# Supplementary material for: Extensive microRNA-mediated crosstalk between lncRNAs and mRNAs in mouse embryonic stem cells
Source: HighWire-hosted journal article supplement (doi:10.1101/gr.181974.114), 2015-03-19
Supplement: Supplemental_TableS1.xlsx [file Supplemental_TableS1.xlsx]

## Sheet: mESC_miRNA_expression
Supplementary table S1.Expression levels of mESC-expressed miRNAs. Unique miRNAs were grouped into miRNA families.
* Red shading indicates top 25% most highly expressed miRNA families
miRNA	seed	miRNA family	Normalized count	St. Dev.
mmu-miR-295	AAGUGCU	miR-93/93a/105/106a/291a-3p/294/295/302abcde/372/373/428/519a/520be/520acd-3p/1378/1420ac	66241.1	3875.69
mmu-miR-294	AAGUGCU	miR-93/93a/105/106a/291a-3p/294/295/302abcde/372/373/428/519a/520be/520acd-3p/1378/1420ac	19856.6	672.527
mmu-miR-293	GUGCCGC	miR-293	18749.7	1579.68
mmu-miR-720	UCUCGCU	miR-720.m	16455.5	2556.43
mmu-miR-292-3p	AAGUGCC	miR-290-3p/292-3p/467a/1420b	10372.4	611.902
mmu-miR-20a	AAAGUGC	miR-17/17-5p/20ab/20b-5p/93/106ab/427/518a-3p/519d	7935.67	687.207
mmu-miR-20b	AAAGUGC	miR-17/17-5p/20ab/20b-5p/93/106ab/427/518a-3p/519d	7935.67	687.207
mmu-miR-292-5p	CUCAAAC	miR-290-5p/292-5p/371-5p/293	4130.43	366.478
mmu-miR-291a-3p	AAGUGCU	miR-93/93a/105/106a/291a-3p/294/295/302abcde/372/373/428/519a/520be/520acd-3p/1378/1420ac	3975.01	394.962
mmu-miR-25	AUUGCAC	miR-25/32/92abc/363/363-3p/367	3430.23	206.58
mmu-miR-106a	AAAGUGC	miR-17/17-5p/20ab/20b-5p/93/106ab/427/518a-3p/519d	3396.26	359.49
mmu-miR-17	AAAGUGC	miR-17/17-5p/20ab/20b-5p/93/106ab/427/518a-3p/519d	3396.26	359.49
mmu-miR-34c	GGCAGUG	miR-34ac/34bc-5p/449abc/449c-5p	2653.09	245.704
mmu-miR-1945	CUUCGCG	miR-1945	2617.62	213.071
mmu-miR-291a-5p	AUCAAAG	miR-291ab-5p	2461.25	355.616
mmu-miR-22	AGCUGCC	miR-22/22-3p	2316.55	156.826
mmu-miR-16	AGCAGCA	miR-15abc/16/16abc/195/322/424/497/1907	1987.97	170.269
mmu-miR-96	UUGGCAC	miR-96/507/1271	1865.81	237.036
mmu-miR-669f-3p	AUAUACA	miR-669f-3p	1712.96	250.57
mmu-miR-669f-5p	GUUGUGU	miR-669pl/669af-5p/2304	1712.96	250.57
mmu-miR-15b	AGCAGCA	miR-15abc/16/16abc/195/322/424/497/1907	1678.67	119.019
mmu-miR-21	AGCUUAU	miR-21/590-5p	1604.05	122.98
mmu-miR-130a	AGUGCAA	miR-130ac/301ab/301b/301b-3p/454/721/4295/3666	1584.62	161.578
mmu-miR-466a-3p	AUACAUA	miR-297b-3p/466ade-3p/467g	1353.77	121.315
mmu-miR-466b-3p	UACAUAC	miR-466bcp-3p	1353.77	121.315
mmu-miR-19a	GUGCAAA	miR-19ab	1287.45	130.248
mmu-miR-302d	AAGUGCU	miR-93/93a/105/106a/291a-3p/294/295/302abcde/372/373/428/519a/520be/520acd-3p/1378/1420ac	1268.4	100.016
mmu-miR-125a-5p	CCCUGAG	miR-125a-5p/125b-5p/351/670/4319	1128.81	114.4
mmu-miR-1224	UGAGGAC	miR-1224-5p/1671	982.401	85.5948
mmu-miR-19b	GUGCAAA	miR-19ab	783.476	79.8554
mmu-miR-183	AUGGCAC	miR-183	770.909	51.9425
mmu-miR-130b	AGUGCAA	miR-130ac/301ab/301b/301b-3p/454/721/4295/3666	679.196	41.0899
mmu-miR-543	AACAUUC	miR-543	666.305	30.6965
mmu-miR-15a	AGCAGCA	miR-15abc/16/16abc/195/322/424/497/1907	654.42	72.3049
mmu-miR-205	CCUUCAU	miR-205/205ab	610.147	24.8348
mmu-miR-27a	UCACAGU	miR-27abc/27a-3p	607.434	49.7941
mmu-miR-302a	AAGUGCU	miR-93/93a/105/106a/291a-3p/294/295/302abcde/372/373/428/519a/520be/520acd-3p/1378/1420ac	589.088	82.3941
mmu-miR-495	AACAAAC	miR-495/1192	577.614	39.6259
mmu-miR-155	UAAUGCU	miR-155	570.2	46.6391
mmu-miR-301a	AGUGCAA	miR-130ac/301ab/301b/301b-3p/454/721/4295/3666	535.908	34.2666
mmu-miR-429	AAUACUG	miR-200bc/429/548a	519.704	47.2927
mmu-miR-200b	AAUACUG	miR-200bc/429/548a	481.955	52.496
mmu-miR-367	AUUGCAC	miR-25/32/92abc/363/363-3p/367	448.1	26.7699
mmu-miR-467c	AAGUGCG	miR-467cd/1420ef	405.777	30.8198
mmu-miR-376b	UCAUAGA	miR-376abd/376b-3p	404.496	52.6103
mmu-miR-136	CUCCAUU	miR-136	395.049	40.9287
mmu-miR-28	AGGAGCU	miR-28-5p/708/1407/1653/3139	362.791	28.8102
mmu-miR-467f	UAUACAC	miR-467f/4789-5p	351.32	26.8033
mmu-miR-125b-5p	CCCUGAG	miR-125a-5p/125b-5p/351/670/4319	343.879	28.9509
mmu-miR-99b	ACCCGUA	miR-99ab/100	337.058	25.2767
mmu-miR-106b	AAAGUGC	miR-17/17-5p/20ab/20b-5p/93/106ab/427/518a-3p/519d	326.745	80.6272
mmu-miR-1983	UCACCUG	miR-412-3p/1983	304.652	31.997
mmu-miR-369-3p	AUAAUAC	miR-369-3p	298.479	11.4262
mmu-miR-23a	UCACAUU	miR-23abc/23b-3p	298.012	11.2694
mmu-miR-191	AACGGAA	miR-191	283.624	23.8594
mmu-miR-200c	AAUACUG	miR-200bc/429/548a	283.252	19.1238
mmu-miR-669a-3p	CAUAACA	miR-669ao-3p/669a-3-3p	281.848	14.0536
mmu-miR-669a-5p	GUUGUGU	miR-669pl/669af-5p/2304	281.848	14.0536
mmu-miR-467a	AAGUGCC	miR-290-3p/292-3p/467a/1420b	280.915	30.9056
mmu-miR-291b-3p	AAGUGCA	miR-519a/519bc-3p/291b-3p/1347	265.487	16.165
mmu-let-7a	GAGGUAG	let-7/98/4458/4500	255.018	30.0304
mmu-miR-93	AAAGUGC	miR-17/17-5p/20ab/20b-5p/93/106ab/427/518a-3p/519d	254.135	28.8775
mmu-miR-148a	CAGUGCA	miR-148ab-3p/152	231.79	25.3311
mmu-miR-467e	UAAGUGU	miR-467eh	228.664	26.5553
mmu-miR-376c	ACAUAGA	miR-376c/741-5p	226.449	34.8148
mmu-miR-410	AUAUAAC	miR-410/344de/344b-1-3p	208.416	19.2042
mmu-miR-669o-3p	CAUAACA	miR-669ao-3p/669a-3-3p	206.786	9.07188
mmu-miR-669o-5p	AGUUGUG	miR-669o-5p	206.786	9.07188
mmu-miR-804	GUGAGUU	miR-804	203.854	10.9878
mmu-miR-467h	UAAGUGU	miR-467eh	203.502	36.3569
mmu-miR-669d	CUUGUGU	miR-581/669d	203.502	36.3569
mmu-miR-669l	GUUGUGU	miR-669pl/669af-5p/2304	203.502	36.3569
mmu-miR-377	UCACACA	miR-377	201.596	10.3889
mmu-miR-323-3p	ACAUUAC	miR-323/323-3p	198.448	20.8653
mmu-miR-126-3p	CGUACCG	miR-126-3p	197.994	22.5368
mmu-miR-674	CACUGAG	miR-674/674-5p/3473d	193.498	11.2001
mmu-miR-32	AUUGCAC	miR-25/32/92abc/363/363-3p/367	191.162	5.06295
mmu-miR-103	GCAGCAU	miR-103a/107/107ab	188.994	19.4164
mmu-miR-363-3p	AUUGCAC	miR-25/32/92abc/363/363-3p/367	187.476	20.2789
mmu-miR-296-5p	GGGCCCC	miR-296-5p	178.771	13.6368
mmu-miR-124	AAGGCAC	miR-124/124ab/506	169.761	22.2174
mmu-miR-23b	UCACAUU	miR-23abc/23b-3p	169.529	10.1076
mmu-miR-434-3p	UUGAACC	miR-434-3p	167.565	10.6914
mmu-miR-30b	GUAAACA	miR-30abcdef/30abe-5p/384-5p	166.507	20.4382
mmu-miR-376a	UCGUAGA	miR-376a	164.109	75.0072
mmu-miR-29a	AGCACCA	miR-29abcd	159.489	9.55244
mmu-miR-1196	AAUCUAC	miR-1196	158.968	9.55432
mmu-miR-374	UAUAAUA	miR-374ab	157.308	20.472
mmu-miR-145	UCCAGUU	miR-145	157.221	7.60271
mmu-miR-200a	AACACUG	miR-141/200a	151.385	6.16611
mmu-miR-382	AAGUUGU	miR-382	147.668	7.25446
mmu-miR-423-3p	GCUCGGU	miR-423-3p	146.898	6.05266
mmu-miR-151-5p	CGAGGAG	miR-151-5p/151b	145.542	8.60555
mmu-miR-127	CGGAUCC	miR-127/127-3p	144.469	11.0869
mmu-miR-532-5p	AUGCCUU	miR-532-5p/511	143.551	16.9925
mmu-miR-1952	CUCCACC	miR-1952	143.05	25.4261
mmu-miR-150	CUCCCAA	miR-150/5127	142.847	7.74456
mmu-miR-431	GUCUUGC	miR-431	141.793	18.1764
mmu-let-7g	GAGGUAG	let-7/98/4458/4500	141.256	5.55865
mmu-miR-193b	ACUGGCC	miR-193/193b/193a-3p	138.756	14.3222
mmu-miR-29b	AGCACCA	miR-29abcd	137.611	15.2551
mmu-miR-1935	GGCAGAG	miR-1935	134.47	10.0177
mmu-miR-297a	UGUAUGU	miR-297ac/297b-5p	134.112	9.24076
mmu-miR-466f	CGUGUGU	miR-466f	134.112	9.24076
mmu-miR-101b	ACAGUAC	miR-101/101ab	133.418	33.5014
mmu-miR-134	GUGACUG	miR-134/3118	130.934	14.8086
mmu-miR-433	UCAUGAU	miR-433	129.919	6.0734
mmu-miR-18b	AAGGUGC	miR-18ab/4735-3p	127.652	9.31588
mmu-miR-421	UCAACAG	miR-421	127.401	8.66247
mmu-miR-340-5p	UAUAAAG	miR-340-5p	126.655	12.664
mmu-miR-142-3p	GUAGUGU	miR-142-3p	124.699	10.7669
mmu-miR-541	AGGGAUU	miR-541	123.545	6.62115
mmu-miR-466c-3p	UACAUAC	miR-466bcp-3p	122.262	3.32625
mmu-miR-335-3p	UUUUCAU	miR-335-3p	118.82	10.7307
mmu-let-7c	GAGGUAG	let-7/98/4458/4500	114.772	8.66816
mmu-miR-297c	UGUAUGU	miR-297ac/297b-5p	114.63	10.0082
mmu-miR-291b-5p	AUCAAAG	miR-291ab-5p	114.083	22.5962
mmu-miR-30d	GUAAACA	miR-30abcdef/30abe-5p/384-5p	114.04	9.97716
mmu-miR-378	CUGGACU	miR-378/422a/378bcdefhi	113.736	3.04727
mmu-miR-142-5p	AUAAAGU	miR-142-5p	111.878	18.4082
mmu-miR-29c	AGCACCA	miR-29abcd	110.83	3.14523
mmu-miR-872	AGGUUAC	miR-872/1421acal	106.88	14.1928
mmu-miR-381	AUACAAG	miR-300/381/539-3p	104.528	10.5576
mmu-miR-26b	UCAAGUA	miR-26ab/1297/4465	103.705	10.7295
mmu-miR-30a	GUAAACA	miR-30abcdef/30abe-5p/384-5p	102.455	10.3152
mmu-miR-484	CAGGCUC	miR-344a-5p/484/3155/3155b	97.6254	15.5757
mmu-let-7e	GAGGUAG	let-7/98/4458/4500	96.1607	14.2926
mmu-miR-423-5p	GAGGGGC	miR-423a/423-5p/3184/3573-5p	95.6397	8.5182
mmu-miR-1893	GCGCGGG	miR-1893/2277-5p	94.3156	6.80562
mmu-miR-466g	UACAGAC	miR-466g	94.0996	9.67791
mmu-miR-335-5p	CAAGAGC	miR-335/335-5p	93.7236	15.5799
mmu-miR-713	GCACUGA	miR-713	93.5073	11.9678
mmu-miR-148b	CAGUGCA	miR-148ab-3p/152	93.113	6.43213
mmu-miR-350	UCACAAA	miR-350	92.8027	13.3535
mmu-miR-26a	UCAAGUA	miR-26ab/1297/4465	92.3871	9.72906
mmu-miR-129-1-3p	AGCCCUU	miR-129-3p/129ab-3p/129-1-3p/129-2-3p	91.8095	4.58452
mmu-miR-129-2-3p	AGCCCUU	miR-129-3p/129ab-3p/129-1-3p/129-2-3p	91.8095	4.58452
mmu-miR-33	UGCAUUG	miR-33ab/33-5p	91.4518	12.0231
mmu-miR-154	AGGUUAU	miR-154/872	90.5991	7.88962
mmu-miR-152	CAGUGCA	miR-148ab-3p/152	90.293	11.9195
mmu-miR-141	AACACUG	miR-141/200a	89.3079	9.83211
mmu-miR-329	ACACACC	miR-329/329ab/362-3p	89.0287	14.3037
mmu-miR-182	UUGGCAA	miR-182	88.4728	19.5933
mmu-miR-290-3p	AAGUGCC	miR-290-3p/292-3p/467a/1420b	87.4225	19.9161
mmu-miR-741	GAGAGAU	miR-741	84.4467	10.1579
mmu-miR-1198-3p	AGCUAGC	miR-1198-3p	84.2979	6.66992
mmu-miR-1198-5p	AUGUGUU	miR-1198-5p	84.2979	6.66992
mmu-miR-762	GGGCUGG	miR-762/4492/4498	83.5157	16.4324
mmu-miR-202-3p	GAGGUAU	miR-202-3p	83.2554	11.7446
mmu-miR-132	AACAGUC	miR-132/212/212-3p	82.6854	6.02877
mmu-miR-181a	ACAUUCA	miR-181abcd/4262	82.4334	5.97214
mmu-miR-487b	AUCGUAC	miR-487b	82.4192	10.6766
mmu-miR-1960	CAGUGCU	miR-1419d/1960	81.051	6.78681
mmu-miR-195	AGCAGCA	miR-15abc/16/16abc/195/322/424/497/1907	80.9862	10.2249
mmu-miR-672	GAGGUUG	miR-377/672	80.3859	8.11183
mmu-miR-34a	GGCAGUG	miR-34ac/34bc-5p/449abc/449c-5p	79.4087	10.725
mmu-miR-330	CUCUGGG	miR-326/330/330-5p	77.1556	9.35766
mmu-miR-468	AUGACUG	miR-468	76.8022	9.71174
mmu-miR-760-3p	GGCUCUG	miR-760-3p/1842	76.6817	5.76303
mmu-miR-760-5p	CCCUCAG	miR-760-5p	76.6817	5.76303
mmu-let-7i	GAGGUAG	let-7/98/4458/4500	76.3297	6.11328
mmu-miR-135b	AUGGCUU	miR-135ab/135a-5p	75.3016	15.0222
mmu-miR-708	AGGAGCU	miR-28-5p/708/1407/1653/3139	74.5562	4.24178
mmu-miR-2139	GCUGCGC	miR-2139	74.5005	11.1199
mmu-miR-361	UAUCAGA	miR-361-5p	73.4206	10.3095
mmu-miR-3472	AAUAGCC	miR-3472	72.9578	11.2086
mmu-miR-467b	UAAGUGC	miR-467b	72.9055	3.86656
mmu-let-7f	GAGGUAG	let-7/98/4458/4500	72.8156	4.6949
mmu-miR-539-5p	GAGAAAU	miR-539/539-5p	72.7584	15.3268
mmu-miR-24	GGCUCAG	miR-24/24ab/24-3p	72.3908	10.0047
mmu-miR-690	AAGGCUA	miR-690	72.0324	6.32609
mmu-miR-181c	ACAUUCA	miR-181abcd/4262	71.8927	12.7307
mmu-miR-128	CACAGUG	miR-128/128ab	70.1184	4.14072
mmu-miR-450a	UUUGCGA	miR-450a/451a	69.6704	8.85008
mmu-miR-770-3p	GUGGGCC	miR-770-3p	69.5362	5.15742
mmu-miR-574-5p	GAGUGUG	miR-574-5p	69.1442	10.105
mmu-miR-432	CUUGGAG	miR-432	68.4887	3.50675
mmu-miR-1940	UGGAGGA	miR-1940/2893	67.9446	6.60547
mmu-miR-201	ACUCAGU	miR-201	67.4686	7.47789
mmu-miR-879	GAGGCUU	miR-879/3188	67.3499	6.18233
mmu-miR-574-3p	ACGCUCA	miR-574-3p	66.3059	15.2126
mmu-miR-654-3p	AUGUCUG	miR-654-3p	66.0056	6.32803
mmu-miR-1942	CAGAUGU	miR-1942	65.9475	7.16834
mmu-miR-668	GUCACUC	miR-668	65.7452	6.3286
mmu-miR-1967	GAGGAUC	miR-1967	65.7082	8.1062
mmu-miR-30e	GUAAACA	miR-30abcdef/30abe-5p/384-5p	65.5967	11.7617
mmu-miR-1187	AUGUGUG	miR-466b/466aep-5p/1187	65.16	13.8992
mmu-miR-135a	AUGGCUU	miR-135ab/135a-5p	65.1234	2.13111
mmu-miR-764-5p	GUGCUCA	miR-764-5p	65.1006	6.16929
mmu-miR-202-5p	UCCUAUG	miR-202-5p/337-3p	64.9199	8.26819
mmu-miR-483	AGACGGG	miR-483-5p	64.5646	12.1646
mmu-miR-675-5p	GGUGCGG	miR-675-5p/4466	64.4805	8.05093
mmu-miR-146a	GAGAACU	miR-146ac/146b-5p	64.4377	10.9293
mmu-miR-2137	CCGGCGG	miR-2137	64.3441	4.63839
mmu-miR-338-3p	CCAGCAU	miR-338/338-3p	64.1649	12.0954
mmu-miR-7a	GGAAGAC	miR-7/7ab	63.7364	4.69795
mmu-miR-501-5p	AUCCUUU	miR-501-5p	63.0364	10.0337
mmu-miR-875-3p	CUGAAAA	miR-875-3p.m	62.875	7.52159
mmu-miR-3470a	CACUUUG	miR-3470a	62.8509	7.95122
mmu-miR-3470b	CACUCUG	miR-2461-5p/3470b	62.8509	7.95122
mmu-miR-707	AGUCAUG	miR-707	62.379	6.79867
mmu-miR-331-5p	UAGGUAU	miR-331-5p	61.4692	7.58518
mmu-miR-322	AGCAGCA	miR-15abc/16/16abc/195/322/424/497/1907	61.372	8.3176
mmu-miR-99a	ACCCGUA	miR-99ab/100	61.342	10.6866
mmu-miR-2183	UGAACCC	miR-2183	61.1917	11.8092
mmu-miR-709	GAGGCAG	miR-709/1827	61.0993	9.9348
mmu-miR-466l-3p	AUAAAUA	miR-466l-3p	59.9543	2.71255
mmu-miR-466l-5p	UGUGUGU	miR-466d/466l-5p	59.9543	2.71255
mmu-miR-194	GUAACAG	miR-194	59.5692	4.65616
mmu-miR-30c	GUAAACA	miR-30abcdef/30abe-5p/384-5p	59.2496	4.18509
mmu-miR-1964-3p	CGACUUC	miR-1964-3p	59.1056	1.31055
mmu-miR-676	CGUCCUG	miR-676.m	58.8424	5.78291
mmu-miR-125a-3p	CAGGUGA	miR-125a-3p/1554	58.5059	13.6632
mmu-miR-669j	GCAUAUA	miR-669ij	58.4861	10.573
mmu-miR-434-5p	CUCGACU	miR-434-5p	58.4837	10.1568
mmu-miR-678	UCUCGGU	miR-678.m	57.6986	5.23679
mmu-miR-759	CAGAGUG	miR-759	57.3645	8.12244
mmu-miR-682	UGCAGUC	miR-682	57.3096	2.29029
mmu-miR-463	GAUAGAC	miR-463	57.0591	6.839
mmu-miR-466e-5p	AUGUGUG	miR-466b/466aep-5p/1187	56.4654	7.12552
mmu-miR-671-3p	CCGGUUC	miR-671-3p	56.4223	8.47135
mmu-miR-669h-5p	UGCAUGG	miR-669h-5p	56.4037	9.18637
mmu-miR-873	CAGGAAC	miR-873	56.3397	7.05054
mmu-let-7d	GAGGUAG	let-7/98/4458/4500	56.0893	1.99749
mmu-miR-302b	AAGUGCU	miR-93/93a/105/106a/291a-3p/294/295/302abcde/372/373/428/519a/520be/520acd-3p/1378/1420ac	55.9651	4.71155
mmu-miR-342-3p	CUCACAC	miR-342-3p	55.6821	8.11505
mmu-miR-380-5p	UGGUUGA	miR-380-5p/2448	55.384	4.16398
mmu-miR-466k	GUGUGUG	miR-466k/466di-5p	55.0618	14.4539
mmu-miR-717	UCAGACA	miR-717	54.6286	5.50037
mmu-miR-1928	GCUACAU	miR-221/222/222ab/1928	54.6078	5.25454
mmu-miR-670	UCCCUGA	miR-670	53.9882	5.47236
mmu-miR-331-3p	CCCCUGG	miR-331/331-3p	53.6147	7.41059
mmu-miR-761	CAGCAGG	miR-214/761/3619-5p	53.4316	2.83958
mmu-miR-107	GCAGCAU	miR-103a/107/107ab	53.2753	5.79672
mmu-miR-882	GGAGAGA	miR-185/882/3473/4306/4644	52.9528	5.21631
mmu-miR-1965	AGCCGGG	miR-1965	52.478	4.34506
mmu-miR-669e	GUCUUGU	miR-669e	52.1133	2.40787
mmu-miR-337-3p	UCAGCUC	miR-337/337-3p	51.9409	5.96314
mmu-miR-149	CUGGCUC	miR-149	51.4382	2.7453
mmu-miR-764-3p	GGAGGCC	miR-764-3p/1421i	51.1289	2.95955
mmu-miR-1904	UUCUGCU	miR-1904	51.1286	4.09389
mmu-miR-129-5p	UUUUUGC	miR-129-5p/129ab-5p	51.063	9.26241
mmu-miR-1958	AGGAAAG	miR-1958	51.0494	4.87649
mmu-miR-1956	GUCCAGG	miR-1956	51.0365	12.091
mmu-miR-133a	UUGGUCC	miR-133abc	50.3319	5.26472
mmu-miR-300	AUGCAAG	miR-300/300-3p	50.275	2.24802
mmu-miR-691	UUCCUGA	miR-691	49.9403	11.3245
mmu-miR-652	AUGGCGC	miR-652	49.8253	5.64407
mmu-miR-1929	UCUAGGA	miR-1929	49.7522	4.51907
mmu-miR-320	AAAGCUG	miR-320abcd/4429	49.3795	13.1534
mmu-miR-224	AAGUCAC	miR-224	49.29	6.62204
mmu-miR-1964-5p	GCUGGAG	miR-1964-5p/3135b	49.1827	7.12166
mmu-miR-3471	GAGAUCC	miR-3471	49.01	8.77901
mmu-miR-365	AAUGCCC	miR-33a-3p/365/365-3p	48.8078	4.55948
mmu-miR-411	AGUAGAC	miR-411	48.8072	4.7186
mmu-miR-199a-3p	CAGUAGU	miR-199ab-3p/3129-5p	48.5794	10.4083
mmu-miR-192	UGACCUA	miR-192/215	48.4241	5.87787
mmu-miR-1197	AGGACAC	miR-1197	48.3352	7.68116
mmu-miR-582-5p	ACAGUUG	miR-582-5p.dmrz	48.3271	11.0337
mmu-miR-883b-3p	AACUGCA	miR-883ab-3p	48.3077	8.01214
mmu-miR-490-3p	AACCUGG	miR-490-3p	48.0338	2.41905
mmu-miR-490-5p	CAUGGAU	miR-490-5p	48.0338	2.41905
mmu-miR-34b-3p	AUCACUA	miR-34bc-3p	47.9988	12.0094
mmu-miR-466a-5p	AUGUGUG	miR-466b/466aep-5p/1187	47.9768	3.11302
mmu-miR-883b-5p	ACUGAGA	miR-883b-5p	47.8685	5.69473
mmu-miR-100	ACCCGUA	miR-99ab/100	47.8561	3.94742
mmu-miR-493	GAAGGUC	miR-493/493b	47.6234	7.78292
mmu-miR-1943	AGGGAGG	miR-1321/1943/4739/4756-5p	47.5633	11.5356
mmu-miR-210	UGUGCGU	miR-210	47.5113	2.78126
mmu-miR-1306-3p	CGUUGGC	miR-1306/1306-3p	47.3277	18.8243
mmu-miR-369-5p	GAUCGAC	miR-369-5p	47.2249	8.66186
mmu-miR-345-5p	CUGACCC	miR-345-5p.m	47.1148	11.687
mmu-miR-742	AAAGCCA	miR-742	46.9105	8.50313
mmu-miR-1900	GCCGCCC	miR-1900/4632	46.753	4.34854
mmu-miR-547	UUGGUAC	miR-547	46.6021	5.74123
mmu-miR-185	GGAGAGA	miR-185/882/3473/4306/4644	46.5677	3.84194
mmu-miR-1963	GGGACGA	miR-1963	46.5615	6.31089
mmu-miR-380-3p	AUGUAGU	miR-380-3p	46.3629	8.29033
mmu-miR-31	GGCAAGA	miR-31	46.189	8.00521
mmu-miR-667	GACACCU	miR-667	45.882	5.1753
mmu-miR-324-5p	GCAUCCC	miR-324-5p	45.5194	9.13391
mmu-miR-875-5p	AUACCUC	miR-875-5p	45.3266	5.98908
mmu-miR-3474	CCUGGGA	miR-3474	45.1983	8.92626
mmu-miR-290-5p	CUCAAAC	miR-290-5p/292-5p/371-5p/293	45.1072	8.77806
mmu-miR-34b-5p	GGCAGUG	miR-34ac/34bc-5p/449abc/449c-5p	44.9002	8.09621
mmu-miR-1188	GGUGUGA	miR-1188/1188-5p	44.8509	8.84593
mmu-miR-140	AGUGGUU	miR-140/140-5p/876-3p/1244	44.5221	6.66385
mmu-miR-190	GAUAUGU	miR-190/190ab	44.4698	8.37144
mmu-miR-665	CCAGGAG	miR-665	44.2968	3.70026
mmu-miR-876-3p	AGUGGUU	miR-140/140-5p/876-3p/1244	44.2765	6.58324
mmu-miR-509-5p	ACUCCAG	miR-508-5p/509-5p	44.2717	5.84172
mmu-miR-767	GCACCAU	miR-767-5p	43.5282	4.3901
mmu-miR-485	GAGGCUG	miR-485-5p/1698/1703/1962	43.522	1.14464
mmu-miR-338-5p	ACAAUAU	miR-338-5p	43.5082	4.10594
mmu-miR-101a	ACAGUAC	miR-101/101ab	43.433	12.1593
mmu-miR-146b	GAGAACU	miR-146ac/146b-5p	43.4121	7.06845
mmu-miR-1962	GAGGCUG	miR-485-5p/1698/1703/1962	43.2534	7.33171
mmu-miR-425	AUGACAC	miR-425/425-5p/489	43.0848	7.32203
mmu-miR-139-5p	CUACAGU	miR-139-5p	42.9063	5.07665
mmu-miR-3072	GCCCCCU	miR-3072/4313	42.2966	5.10308
mmu-miR-181b	ACAUUCA	miR-181abcd/4262	42.2852	4.68459
mmu-miR-181d	ACAUUCA	miR-181abcd/4262	42.2852	4.68459
mmu-miR-1903	CUUCUUC	miR-1903/4778-3p	42.2438	10.1325
mmu-miR-669i	GCAUAUA	miR-669ij	42.1785	3.50207
mmu-miR-467g	AUACAUA	miR-297b-3p/466ade-3p/467g	42.1589	9.96837
mmu-miR-1839-5p	AGGUAGA	miR-1348/1839/1839-5p/3927	41.9793	3.05525
mmu-miR-27b	UCACAGU	miR-27abc/27a-3p	41.8092	5.58669
mmu-miR-92b	AUUGCAC	miR-25/32/92abc/363/363-3p/367	41.6554	6.7915
mmu-miR-203	UGAAAUG	miR-203	41.5143	2.01106
mmu-miR-877	UAGAGGA	miR-877	40.865	11.9677
mmu-miR-542-5p	UCGGGGA	miR-542-5p.hmr	40.1438	7.52574
mmu-miR-187	CGUGUCU	miR-187	40.1306	1.39083
mmu-miR-219-3p	GAAUUGU	miR-219-2-3p/219-3p	39.9604	3.43781
mmu-miR-219-5p	GAUUGUC	miR-219-5p/508/508-3p/4782-3p	39.9604	3.43781
mmu-miR-1898	GGUCAAG	miR-1898	39.8387	7.57232
mmu-miR-499	UAAGACU	miR-499-5p	39.6762	8.43168
mmu-miR-1894-5p	UCUCCCC	miR-1894-5p/2394	39.6625	5.03002
mmu-miR-673-5p	UCACAGC	miR-673-5p	39.6068	11.8689
mmu-miR-551b	CGACCCA	miR-551a	39.5638	7.95196
mmu-miR-206	GGAAUGU	miR-1ab/206/613	39.4665	6.03549
mmu-miR-881	ACUGUGU	miR-881/892a	39.4627	11.6467
mmu-miR-370	CCUGCUG	miR-370	39.3769	2.99635
mmu-miR-542-3p	GUGACAG	miR-542-3p	39.2498	5.58695
mmu-miR-105	CAAGUGC	miR-105	39.1755	7.82095
mmu-miR-489	AUGACAC	miR-425/425-5p/489	38.8985	5.82504
mmu-miR-409-5p	GGUUACC	miR-409-5p/409a	38.866	2.86139
mmu-miR-532-3p	CUCCCAC	miR-532-3p	38.6695	10.6159
mmu-miR-337-5p	AACGGCG	miR-337-5p.m	38.2331	2.87277
mmu-miR-1193-3p	AGGUCAC	miR-1193-3p/1421x	37.9923	6.40515
mmu-miR-1193-5p	GGUAGAC	miR-379/1193-5p/3529	37.9923	6.40515
mmu-miR-7b	GGAAGAC	miR-7/7ab	37.9836	7.67583
mmu-miR-190b	GAUAUGU	miR-190/190ab	37.8813	5.34259
mmu-miR-684	GUUUUCC	miR-684	37.7232	5.36713
mmu-miR-18a	AAGGUGC	miR-18ab/4735-3p	37.6898	3.94214
mmu-miR-1906	GCAGCAG	miR-1906	37.5319	10.5296
mmu-miR-1946b	CCGGGCA	miR-1946b	37.5316	7.74178
mmu-miR-379	GGUAGAC	miR-379/1193-5p/3529	37.2862	4.62889
mmu-miR-2861	GGGCCUG	miR-2861/3091-3p	37.2591	6.54849
mmu-miR-1a	GGAAUGU	miR-1ab/206/613	37.2332	7.89566
mmu-miR-1b-3p	GGGUACA	miR-1b-3p	37.2332	7.89566
mmu-miR-1b-5p	ACAUACU	miR-1b-5p	37.2332	7.89566
mmu-miR-204	UCCCUUU	miR-204/204b/211	37.0757	4.13081
mmu-miR-151-3p	UAGACUG	miR-151-3p	37.074	6.67873
mmu-miR-1941-3p	AUCUUAG	miR-1941-3p	37.0393	5.46733
mmu-miR-540-3p	GGUCAGA	miR-540-3p	36.9812	3.49019
mmu-miR-184	GGACGGA	miR-184	36.6276	7.9129
mmu-miR-666-5p	GCGGGCA	miR-666-5p	36.3596	7.78316
mmu-miR-1190	CAGCUGA	miR-1190/1691	36.3323	3.87042
mmu-miR-1957	AGUGGUA	miR-1957	36.2926	7.41252
mmu-miR-126-5p	AUUAUUA	miR-126-5p	36.2682	8.05023
mmu-miR-3099	AGGCUAG	miR-3099	36.171	7.81112
mmu-miR-465b-5p	AUUUAGA	miR-465abc-5p	35.9613	5.7303
mmu-miR-883a-3p	AACUGCA	miR-883ab-3p	35.8206	3.49833
mmu-miR-770-5p	GCACCAC	miR-770-5p	35.721	7.57274
mmu-miR-883a-5p	GCUGAGA	miR-883a-5p	35.5788	5.14034
mmu-miR-669g	GCAUUGU	miR-669g	35.4111	4.16547
mmu-miR-683	CUGCUGU	miR-683	34.9694	5.30003
mmu-miR-505-3p	GUCAACA	miR-505/505-3p	34.8334	8.28102
mmu-miR-328	UGGCCCU	miR-328a/328b-3p	34.7883	6.69633
mmu-miR-1894-3p	CAAGGGA	miR-1894-3p	34.7689	8.5506
mmu-miR-143	GAGAUGA	miR-143/1721/4770	34.7245	8.46291
mmu-miR-688	CGCAGGC	miR-688	34.3489	7.51844
mmu-miR-694	UGAAAAU	miR-694	33.9426	5.20908
mmu-miR-298	GCAGAGG	miR-298/2347/2467-3p	33.7548	6.01066
mmu-miR-590-5p	AGCUUAU	miR-21/590-5p	33.7314	5.23435
mmu-miR-497	AGCAGCA	miR-15abc/16/16abc/195/322/424/497/1907	33.5933	4.70684
mmu-miR-695	GAUUGGG	miR-695	33.582	3.41002
mmu-miR-216a	AAUCUCA	miR-216a	33.5505	7.08131
mmu-miR-701	UAGCCGC	miR-701	33.4679	5.40267
mmu-miR-1895	CCCCGAG	miR-1895	33.4654	3.68691
mmu-miR-500	AUGCACC	miR-501-3p/502-3p/500/502a	33.3199	3.79757
mmu-miR-666-3p	GCUGCAG	miR-666-3p	33.224	6.2874
mmu-miR-471-3p	GAAAGGU	miR-471-3p	33.1423	5.17415
mmu-miR-471-5p	ACGUAGU	miR-471-5p	33.1423	5.17415
mmu-miR-221	GCUACAU	miR-221/222/222ab/1928	33.1329	6.40272
mmu-miR-92a	AUUGCAC	miR-25/32/92abc/363/363-3p/367	32.7766	8.89537
mmu-miR-466c-5p	GAUGUGU	miR-466bco-5p	32.6847	3.02718
mmu-miR-511-5p	UGCCUUU	miR-511-5p	32.6052	8.11907
mmu-miR-214	CAGCAGG	miR-214/761/3619-5p	32.3951	6.10458
mmu-miR-1947	GGACGAG	miR-1947	32.366	2.7759
mmu-miR-384-3p	UUCCUAG	miR-384/384-3p	32.1877	5.05551
mmu-miR-1966	AGGGAGC	miR-1966	31.8469	8.55932
mmu-miR-125b-1-3p	CGGGUUA	miR-125b-1-3p/125b-3p	31.7508	6.4264
mmu-miR-125b-2-3p	CAAGUCA	miR-125b-2-3p	31.7508	6.4264
mmu-miR-323-5p	GGUGGUC	miR-323-5p/1421qns	31.4072	4.9957
mmu-miR-3473	GGAGAGA	miR-185/882/3473/4306/4644	31.0741	5.47058
mmu-miR-653	UGUUGAA	miR-653	30.8276	6.69285
mmu-miR-1901	CGCUCGU	miR-1901	30.8083	5.25973
mmu-miR-711	GGACCCG	miR-711.m	30.8011	9.04777
mmu-miR-465c-5p	AUUUAGA	miR-465abc-5p	30.7516	8.26575
mmu-miR-470	UCUUGGA	miR-470	30.6551	2.22157
mmu-miR-450b-5p	UUUGCAG	miR-450b-5p.m	30.617	6.86284
mmu-miR-465a-3p	AUCAGGG	miR-465abc-3p	30.5557	6.30781
mmu-miR-218	UGUGCUU	miR-218/218a	30.4187	5.44415
mmu-miR-448-3p	UGCAUAU	miR-448/448-3p	30.1812	7.0257
mmu-miR-1892	UUUGGGG	miR-1892	29.9224	6.19421
mmu-miR-876-5p	GGAUUUC	miR-876-5p/3167	29.8601	6.52685
mmu-miR-1199	CUGAGUC	miR-1199	29.7775	5.29993
mmu-miR-133b	UUGGUCC	miR-133abc	29.6438	5.86768
mmu-miR-383	GAUCAGA	miR-383	29.54	3.22604
mmu-miR-1941-5p	GGGAGAU	miR-1941-5p	29.5361	4.96769
mmu-miR-3475	CUGGAGG	miR-1843/3475	29.4788	6.03015
mmu-miR-1194	AAUGAGU	miR-1194	29.368	7.77487
mmu-miR-1961	GAGGUAG	let-7/98/4458/4500	29.2909	5.32733
mmu-miR-340-3p	CCGUCUC	miR-340-3p	29.0638	7.19439
mmu-miR-302c	AGUGCUU	miR-302ac/520f	29.0002	1.56261
mmu-miR-496	GAGUAUU	miR-496	28.7047	6.08731
mmu-miR-486	CCUGUAC	miR-486-5p/3107	28.647	8.264
mmu-miR-452-3p	CAGUCUC	miR-452-3p	28.5758	1.6886
mmu-miR-452-5p	GUUUGCA	miR-452-5p	28.5758	1.6886
mmu-miR-696	CGUGUGC	miR-696	28.5196	4.79278
mmu-miR-409-3p	AAUGUUG	miR-409-3p	28.4532	4.45021
mmu-miR-346	GUCUGCC	miR-346	28.3211	1.79495
mmu-miR-207	CUUCUCC	miR-207	28.2689	4.17339
mmu-miR-743b-3p	AAAGACA	miR-743a/743b-3p	28.148	8.80148
mmu-miR-664	AUUCAUU	miR-664/664b	28.1392	5.50309
mmu-miR-1195	GAGUUCG	miR-1195	28.0219	4.63557
mmu-miR-345-3p	CUGAACU	miR-345-3p/4539	27.9496	4.03283
mmu-miR-455	CAGUCCA	miR-455-3p	27.7645	8.85106
mmu-miR-344	GAUCUAG	miR-344a-3p/344c	27.6357	7.45955
mmu-miR-1907	AGCAGCA	miR-15abc/16/16abc/195/322/424/497/1907	27.5963	3.66081
mmu-miR-98	GAGGUAG	let-7/98/4458/4500	27.393	7.41204
mmu-miR-10a	ACCCUGU	miR-10abc/10a-5p	27.2664	2.69751
mmu-miR-362-3p	ACACACC	miR-329/329ab/362-3p	27.1387	4.33662
mmu-miR-138	GCUGGUG	miR-138/138ab	26.7239	9.09904
mmu-miR-9	CUUUGGU	miR-9/9ab	26.6591	3.16085
mmu-miR-297b-3p	AUACAUA	miR-297b-3p/466ade-3p/467g	26.508	6.42852
mmu-miR-1955-5p	GUCCCAG	miR-1955-5p	26.4249	4.56651
mmu-miR-880	ACUCCAU	miR-880	26.2466	4.62942
mmu-miR-1946a	GCCGGGC	miR-1946a	25.9135	3.49457
mmu-miR-144	ACAGUAU	miR-144	25.8905	4.80717
mmu-miR-466h-3p	ACGCACG	miR-466h-3p	25.6197	8.48388
mmu-miR-466h-5p	GUGUGCA	miR-466h-5p/466j/466m-5p/669m-5p	25.6197	8.48388
mmu-miR-1902	GAGGUGC	miR-1902	25.6195	5.17226
mmu-miR-222	GCUACAU	miR-221/222/222ab/1928	25.6013	8.23221
mmu-miR-186	AAAGAAU	miR-186	25.4496	4.51667
mmu-miR-743a	AAAGACA	miR-743a/743b-3p	25.4047	4.10892
mmu-miR-362-5p	AUCCUUG	miR-362-5p/500b	25.3691	5.82781
mmu-miR-1953	GGGAAAG	miR-1953/3153	25.314	3.875
mmu-miR-1933-5p	GUCAUGG	miR-1933-5p	25.173	5.30574
mmu-miR-491	GUGGGGA	miR-491-5p	25.157	4.99822
mmu-miR-1839-3p	GACCUAC	miR-1839-3p	25.0212	2.62476
mmu-miR-540-5p	AAGGGUC	miR-540-5p	24.9379	4.86287
mmu-miR-301b	AGUGCAA	miR-130ac/301ab/301b/301b-3p/454/721/4295/3666	24.8715	5.43066
mmu-miR-878-3p	CAUGACA	miR-878-3p	24.8342	7.72264
mmu-miR-467d	AAGUGCG	miR-467cd/1420ef	24.7465	3.7834
mmu-miR-296-3p	AGGGUUG	miR-296-3p	24.718	5.9378
mmu-miR-412-3p	UCACCUG	miR-412-3p/1983	24.6737	2.32393
mmu-miR-412-5p	GGUCGAC	miR-412-5p	24.6737	2.32393
mmu-miR-1951	UAGUGGA	miR-1951	24.4686	5.23981
mmu-miR-494	GAAACAU	miR-494	24.3529	3.35183
mmu-miR-1968	GCAGCUG	miR-1968	24.3135	7.29335
mmu-miR-705	GUGGGAG	miR-705/2897	24.2748	3.30734
mmu-miR-211	UCCCUUU	miR-204/204b/211	24.2709	4.94025
mmu-miR-504	GACCCUG	miR-504/4725-5p	23.3976	5.12099
mmu-miR-326	CUCUGGG	miR-326/330/330-5p	23.3957	4.06941
mmu-miR-680	GGCAUCU	miR-680	23.3544	4.26533
mmu-miR-199a-5p	CCAGUGU	miR-199ab-5p	23.3125	5.62697
mmu-miR-451	AACCGUU	miR-451	23.2981	2.60537
mmu-miR-1191	AGUCUUA	miR-1191	23.2234	2.90949
mmu-miR-466j	GUGUGCA	miR-466h-5p/466j/466m-5p/669m-5p	23.1585	1.39586
mmu-miR-677	UCAGUGA	miR-677/4276	23.0196	5.22046
mmu-miR-544-3p	UUCUGCA	miR-544/544ab/544-3p	23.0045	4.34631
mmu-miR-878-5p	AUCUAGU	miR-878-5p	22.6876	7.49635
mmu-miR-450b-3p	UUGGGAA	miR-450b-3p	22.629	3.42297
mmu-miR-297b-5p	UGUAUGU	miR-297ac/297b-5p	22.611	5.36247
mmu-miR-704	GACAUGU	miR-704	22.549	2.62328
mmu-miR-466f-5p	ACGUGUG	miR-466f-5p/2408	22.3186	1.88121
mmu-miR-2182	CGCCACA	miR-2182	22.2484	3.42668
mmu-miR-465a-5p	AUUUAGA	miR-465abc-5p	22.2216	3.99677
mmu-miR-325	UUAUUGA	miR-325-3p	22.2009	5.98552
mmu-miR-592	UUGUGUC	miR-592/599	22.1433	2.98989
mmu-miR-1971	UAAAGGC	miR-1971/1981	21.9998	1.77734
mmu-miR-223	GUCAGUU	miR-223	21.9574	4.97866
mmu-miR-196a	AGGUAGU	miR-196abc	21.8715	3.77263
mmu-miR-216b	AAUCUCU	miR-216b/216b-5p	21.6905	1.384
mmu-miR-568	UGUAUAA	miR-568	21.6402	4.5326
mmu-miR-703	AAACCUU	miR-703	21.5993	8.01805
mmu-miR-341	CGGUCGA	miR-341	21.4933	2.99019
mmu-miR-448-5p	AACAUCC	miR-448-5p	21.4503	2.71139
mmu-miR-193	ACUGGCC	miR-193/193b/193a-3p	21.3528	0.996954
mmu-miR-582-3p	CUGUUGA	miR-582-3p/1267/1396	21.2924	4.95978
mmu-miR-1186	AGUGCUG	miR-93b/512-3p/1186	21.2142	8.79996
mmu-miR-501-3p	AUGCACC	miR-501-3p/502-3p/500/502a	21.1673	8.26675
mmu-miR-188-3p	UCCCACA	miR-188-3p	21.1619	2.74786
mmu-miR-692	UCUCUUU	miR-692/4753-3p	21.1067	4.14729
mmu-miR-1931	UGCAAGG	miR-1931	21.0127	4.22648
mmu-miR-122	GGAGUGU	miR-122/122a/1352	20.8436	1.85783
mmu-miR-599	UGUGUCA	miR-592/599.m	20.6423	2.60209
mmu-miR-188-5p	AUCCCUU	miR-188-5p	20.6161	3.2593
mmu-miR-139-3p	GGAGACG	miR-139-3p.dmr	20.5689	6.45093
mmu-miR-2136	UGGGUGU	miR-2136	20.5667	3.44085
mmu-miR-874	UGCCCUG	miR-874	20.4187	3.14153
mmu-miR-1930	CCUCCAU	miR-1930	20.3068	2.68831
mmu-miR-1949	UAUACCA	miR-1949.m	20.1656	3.04166
mmu-miR-718	UUCCGCC	miR-718	19.9229	1.12846
mmu-miR-137	UAUUGCU	miR-137/137ab	19.7071	7.26215
mmu-miR-1192	AACAAAC	miR-495/1192	19.6438	2.5722
mmu-miR-449c	GGCAGUG	miR-34ac/34bc-5p/449abc/449c-5p	19.5467	3.79677
mmu-miR-509-3p	GAUUGAC	miR-509-3p/514	19.3694	4.82202
mmu-miR-1970	GUGUCAC	miR-597/1970	19.355	5.15245
mmu-miR-706	GAGAAAC	miR-706	19.3472	3.93105
mmu-miR-763	CAGCUGG	miR-763/1207-3p/1655	19.3407	2.51238
mmu-miR-1954	CUGCAGA	miR-1954/3158-5p	19.27	5.67629
mmu-miR-327	CUUGAGG	miR-327	19.2634	3.30714
mmu-miR-488	UGAAAGG	miR-488	19.1754	2.9384
mmu-miR-208a-3p	UAAGACG	miR-208ab/208ab-3p	19.1133	6.06832
mmu-miR-1936	AACUGAC	miR-1936	19.0071	5.02881
mmu-miR-719	UCUCGGC	miR-719	18.9752	4.5801
mmu-miR-669m-3p	UAUACAU	miR-669m-3p	18.4619	7.78184
mmu-miR-669m-5p	GUGUGCA	miR-466h-5p/466j/466m-5p/669m-5p	18.4619	7.78184
mmu-miR-10b	ACCCUGU	miR-10abc/10a-5p	18.2032	2.66238
mmu-miR-712	UCCUUCA	miR-712	18.0854	1.24883
mmu-miR-744	GCGGGGC	miR-744/1716	17.8604	1.47264
mmu-miR-743b-5p	GUUCAGA	miR-743b-5p	17.8501	8.44895
mmu-miR-342-5p	GGGGUGC	miR-342-5p/4664-5p	17.7353	6.58673
mmu-miR-802	CAGUAAC	miR-802.mpr	17.6436	6.65539
mmu-miR-654-5p	GGUAAGC	miR-654-5p	17.444	3.73667
mmu-miR-681	AGCCUCG	miR-681	17.4292	3.3745
mmu-miR-871-3p	GACUGGC	miR-871-3p	17.3473	2.74627
mmu-miR-871-5p	AUUCAGA	miR-871-5p/892b	17.3473	2.74627
mmu-miR-1982.1	CUCACCC	miR-1982.1	17.2965	2.62298
mmu-miR-1982.2	CACCCUA	miR-1982.2	17.2965	2.62298
mmu-miR-466i-3p	UACACAC	miR-466i-3p/3941	17.1725	0.326265
mmu-miR-466i-5p	GUGUGUG	miR-466k/466di-5p	17.1725	0.326265
mmu-miR-1186b	GGGAUUA	miR-1186b	17.1233	3.15317
mmu-miR-1933-3p	CAGGACC	miR-1933-3p	16.9302	3.62587
mmu-let-7b	GAGGUAG	let-7/98/4458/4500	16.7541	20.5257
mmu-miR-702	GCCCACC	miR-702/702-3p	16.538	1.64441
mmu-miR-299	AUGUGGG	miR-299/299-3p/3563-3p	16.2656	5.38423
mmu-miR-208b	UAAGACG	miR-208ab/208ab-3p	16.238	4.50299
mmu-miR-343	CUCCCUU	miR-343/4287/4685-3p	16.1516	7.18406
mmu-miR-375	UUGUUCG	miR-375	16.1449	7.41663
mmu-miR-196b	AGGUAGU	miR-196abc	16.0373	3.61829
mmu-miR-1927	ACCUCUG	miR-1927	15.8971	2.19627
mmu-miR-384-5p	GUAAACA	miR-30abcdef/30abe-5p/384-5p	15.8529	2.86729
mmu-miR-1934	CUGGUCC	miR-1934	15.6902	2.48713
mmu-miR-686	UUGCUUC	miR-686	15.6813	1.47539
mmu-miR-1896	UCUCUGA	miR-1756b/1896	15.6289	1.68804
mmu-miR-679-3p	GCAAGGU	miR-679-3p	15.5516	1.84619
mmu-miR-679-5p	GACUGUG	miR-679-5p	15.5516	1.84619
mmu-miR-698	AUUCUCG	miR-698	15.5019	2.3871
mmu-miR-546	UGGUGGC	miR-546	15.4425	1.00121
mmu-miR-1897-3p	CAACUCG	miR-1897-3p	15.4219	4.81897
mmu-miR-693-5p	AGCCACA	miR-693-5p	15.1345	1.50709
mmu-miR-675-3p	UGUAUGC	miR-675-3p	14.6842	1.6994
mmu-miR-1969	AGAUGGA	miR-1969	14.6809	4.06406
mmu-miR-217	ACUGCAU	miR-217	14.5653	5.15103
mmu-miR-693-3p	CAGCUUU	miR-693-3p	14.5475	1.93145
mmu-miR-590-3p	AAUUUUA	miR-590-3p	14.4761	5.07268
mmu-miR-339-3p	GAGCGCC	miR-339-3p	14.2722	5.57121
mmu-miR-1955-3p	AGCAUUG	miR-1955-3p	14.1458	2.64215
mmu-miR-758	UUGUGAC	miR-758	13.9618	3.78336
mmu-miR-147	UGUGCGG	miR-147/147b	13.6336	3.83116
mmu-miR-697	ACAUCCU	miR-697	13.4305	4.59031
mmu-miR-1950	CUGCAUC	miR-1421ag/1950	13.4197	3.804
mmu-miR-503	AGCAGCG	miR-503	13.2403	1.49824
mmu-miR-339-5p	CCCUGUC	miR-339b/339-5p/3586-5p	13.08	3.0911
mmu-miR-1932	UUGCGGA	miR-1932	12.9463	1.10017
mmu-miR-671-5p	GGAAGCC	miR-671-5p	12.7061	2.57237
mmu-miR-453	GGUUGCC	miR-453	12.5701	3.72677
mmu-miR-687	UAUCCUG	miR-687	12.5471	1.68266
mmu-miR-324-3p	CACUGCC	miR-324-3p	12.2645	3.74252
mmu-miR-615-3p	CCGAGCC	miR-615-3p	12.0986	2.3965
mmu-miR-673-3p	CCGGGGC	miR-673-3p/1394	12.0956	2.12082
mmu-miR-710	CAAGUCU	miR-710	12.0675	2.18131
mmu-miR-714	GACGAGG	miR-714	11.9851	3.81525
mmu-miR-449a	GGCAGUG	miR-34ac/34bc-5p/449abc/449c-5p	11.9616	4.19157
mmu-miR-615-5p	GGGGUCC	miR-615-5p	11.8304	3.90245
mmu-miR-351	CCCUGAG	miR-125a-5p/125b-5p/351/670/4319	11.8136	2.75635
mmu-miR-449b	GGCAGUG	miR-34ac/34bc-5p/449abc/449c-5p	11.6922	5.49835
mmu-miR-1938	GGUGGGA	miR-1938	11.3717	1.86584
mmu-miR-1981	UAAAGGC	miR-1971/1981	11.3346	2.04545
mmu-miR-212-3p	AACAGUC	miR-132/212/212-3p	10.2911	2.2175
mmu-miR-1948	UUAGGCA	miR-1948	9.68342	4.18244
mmu-miR-1899	GCGAUGG	miR-1899	8.63885	2.93224
mmu-miR-700	ACGCGGG	miR-700	8.11256	1.40843
mmu-miR-1905	ACCAGUC	miR-1905	7.46177	1.01647
mmu-miR-153	UGCAUAG	miR-153	5.35272	2.19609
