# Supplementary material for: Extensive microRNA-mediated crosstalk between lncRNAs and mRNAs in mouse embryonic stem cells
Source: HighWire-hosted journal article supplement (doi:10.1101/gr.181974.114), 2015-03-19
Supplement: Supplemental_TableS2.xlsx [file Supplemental_TableS2.xlsx]

## Sheet: 25% miRNAs
Supplementary table S2. Number of ceRNAts and miRNA-independent target mRNAs per lncRNA predicted using the top 25% most highly expressed miRNAs.
	lncRNA	ceRNAts		miRNA-independent target mRNAs		Total number of lncRNA-affected genes
		Number	%	Number	%
	linc1230	56	0.337349	110	0.662651	166
	linc1235	2	0.0206186	95	0.979381	97
	linc1239	4	0.0210526	186	0.978947	190
	linc1242	16	0.0496894	306	0.950311	322
	linc1244	27	0.284211	68	0.715789	95
	linc1245	114	0.230769	380	0.769231	494
	linc1251	1	0.5	1	0.5	2
	linc1252	42	0.336	83	0.664	125
	linc1253	17	0.232877	56	0.767123	73
	linc1256	45	0.226131	154	0.773869	199
	linc1257	0	0	58	1	58
	linc1259	47	0.321918	99	0.678082	146
	linc1260	7	0.170732	34	0.829268	41
	linc1261	31	0.116105	236	0.883895	267
	linc1262	32	0.192771	134	0.807229	166
	linc1267	110	0.345912	208	0.654088	318
	linc1270	46	0.285714	115	0.714286	161
	linc1274	0	0	5	1	5
	linc1281	376	0.401709	560	0.598291	936
	linc1282	62	0.284404	156	0.715596	218
	linc1283	60	0.451128	73	0.548872	133
	linc1289	0	0	0	0	0
	linc1290	174	0.465241	200	0.534759	374
	linc1293	4	0.0740741	50	0.925926	54
	linc1296	105	0.351171	194	0.648829	299
	linc1300	37	0.310924	82	0.689076	119
	linc1304	12	0.155844	65	0.844156	77
	linc1307	39	0.19697	159	0.80303	198
	linc1312	64	0.380952	104	0.619048	168
	linc1313	9	0.0638298	132	0.93617	141
	linc1315	35	0.406977	51	0.593023	86
	linc1316	65	0.460993	76	0.539007	141
	linc1317	3	0.5	3	0.5	6
	linc1327	115	0.309973	256	0.690027	371
	linc1328	0	0	7	1	7
	linc1331	13	0.0844156	141	0.915584	154
	linc1335	32	0.278261	83	0.721739	115
	linc1337	0	0	8	1	8
	linc1338	50	0.236967	161	0.763033	211
	linc1346	94	0.284848	236	0.715152	330
	linc1347	37	0.19171	156	0.80829	193
	linc1349	9	0.115385	69	0.884615	78
	linc1354	241	0.315033	524	0.684967	765
	linc1356	96	0.375	160	0.625	256
	linc1359	5	0.0862069	53	0.913793	58
	linc1361	7	0.1	63	0.9	70
	linc1366	9	0.12	66	0.88	75
	linc1368	23	0.163121	118	0.836879	141
	linc1369	10	0.243902	31	0.756098	41
	linc1382	48	0.510638	46	0.489362	94
	linc1385	52	0.237443	167	0.762557	219
	linc1386	5	0.0925926	49	0.907407	54
	linc1388	12	0.214286	44	0.785714	56
	linc1389	17	0.314815	37	0.685185	54
	linc1390	74	0.198391	299	0.801609	373
	linc1391	7	0.122807	50	0.877193	57
	linc1393	113	0.359873	201	0.640127	314
	linc1400	12	0.193548	50	0.806452	62
	linc1405	120	0.364742	209	0.635258	329
	linc1406	2	1	0	0	2
	linc1410	65	0.234657	212	0.765343	277
	linc1411	42	0.347107	79	0.652893	121
	linc1412	6	0.0618557	91	0.938144	97
	linc1413	8	0.0410256	187	0.958974	195
	linc1418	71	0.141717	430	0.858283	501
	linc1419	14	0.089172	143	0.910828	157
	linc1421	11	0.22	39	0.78	50
	linc1422	6	0.162162	31	0.837838	37
	linc1425	52	0.385185	83	0.614815	135
	linc1427	125	0.492126	129	0.507874	254
	linc1428	14	0.153846	77	0.846154	91
	linc1434	11	0.123596	78	0.876404	89
	linc1435	13	0.282609	33	0.717391	46
	linc1448	17	0.0674603	235	0.93254	252
	linc1450	23	0.252747	68	0.747253	91
	linc1454	21	0.105528	178	0.894472	199
	linc1456	39	0.19598	160	0.80402	199
	linc1457	4	0.032	121	0.968	125
	linc1463	37	0.324561	77	0.675439	114
	linc1465	3	0.0461538	62	0.953846	65
	linc1468	10	0.4	15	0.6	25
	linc1470	17	0.165049	86	0.834951	103
	linc1471	170	0.196759	694	0.803241	864
	linc1473	8	0.0754717	98	0.924528	106
	linc1477	7	0.125	49	0.875	56
	linc1483	13	0.254902	38	0.745098	51
	linc1484	1	0.166667	5	0.833333	6
	linc1490	7	0.116667	53	0.883333	60
	linc1503	18	0.514286	17	0.485714	35
	linc1505	67	0.224832	231	0.775168	298
	linc1506	0	0	5	1	5
	linc1510	25	0.225225	86	0.774775	111
	linc1517	4	0.0930233	39	0.906977	43
	linc1524	5	0.0328947	147	0.967105	152
	linc1526	0	0	35	1	35
	linc1536	58	0.244726	179	0.755274	237
	linc1537	8	0.242424	25	0.757576	33
	linc1540	75	0.46875	85	0.53125	160
	linc1543	13	0.288889	32	0.711111	45
	linc1547	17	0.0934066	165	0.906593	182
	linc1552	5	0.049505	96	0.950495	101
	linc1555	110	0.339506	214	0.660494	324
	linc1557	54	0.219512	192	0.780488	246
	linc1558	18	0.153846	99	0.846154	117
	linc1559	200	0.353357	366	0.646643	566
	linc1562	31	0.233083	102	0.766917	133
	linc1563	71	0.365979	123	0.634021	194
	linc1572	24	0.358209	43	0.641791	67
	linc1581	39	0.232143	129	0.767857	168
	linc1582	17	0.191011	72	0.808989	89
	linc1588	0	0	20	1	20
	linc1589	0	0	25	1	25
	linc1592	0	0	1	1	1
	linc1595	0	0	245	1	245
	linc1596	8	0.32	17	0.68	25
	linc1598	1	0.03125	31	0.96875	32
	linc1599	4	0.121212	29	0.878788	33
	linc1600	2	0.0769231	24	0.923077	26
	linc1601	18	0.178218	83	0.821782	101
	linc1602	17	0.137097	107	0.862903	124
	linc1603	56	0.18543	246	0.81457	302
	linc1604	13	0.0541667	227	0.945833	240
	linc1607	65	0.179558	297	0.820442	362
	linc1608	0	0	44	1	44
	linc1609	1	0.0217391	45	0.978261	46
	linc1610	0	0	563	1	563
	linc1611	8	0.0245399	318	0.97546	326
	linc1612	16	0.0981595	147	0.90184	163
	linc1613	18	0.2	72	0.8	90
	linc1614	3	0.030303	96	0.969697	99
	linc1615	9	0.126761	62	0.873239	71
	linc1616	15	0.0815217	169	0.918478	184
	linc1617	10	0.0442478	216	0.955752	226
	linc1618	1	0.03125	31	0.96875	32
	linc1621	57	0.148438	327	0.851562	384
	linc1622	18	0.1125	142	0.8875	160
	linc1623	20	0.0539084	351	0.946092	371
	linc1624	0	0	34	1	34
	linc1626	83	0.162745	427	0.837255	510
	linc1627	5	0.047619	100	0.952381	105
	linc1629	14	0.0484429	275	0.951557	289
	linc1630	1	0.0263158	37	0.973684	38
	linc1631	7	0.205882	27	0.794118	34
	linc1632	25	0.362319	44	0.637681	69
	linc1633	5	0.0588235	80	0.941176	85
	linc1634	9	0.0681818	123	0.931818	132
	linc1635	88	0.261128	249	0.738872	337
