# Supplementary material for: Extensive microRNA-mediated crosstalk between lncRNAs and mRNAs in mouse embryonic stem cells
Source: HighWire-hosted journal article supplement (doi:10.1101/gr.181974.114), 2015-03-19
Supplement: Supplemental_TableS4.xlsx [file Supplemental_TableS4.xlsx]

## Sheet: Sheet1
Supplementary table S4. lncRNAs removed from the initial set of lncRNAs because of their overlap with annotated protein-coding gene annotations.
	Name	Overlapping protein-coding gene
	linc1293	ENSMUSG00000016664
	linc1313	ENSMUSG00000036452
	linc1349	ENSMUSG00000054280
	linc1359	ENSMUSG00000052419
	linc1382	ENSMUSG00000092416
	linc1386	ENSMUSG00000055652
	linc1389	ENSMUSG00000040139
	linc1425	ENSMUSG00000026715
	linc1434	ENSMUSG00000073427
	linc1435	ENSMUSG00000087651
	linc1456	ENSMUSG00000073000
	linc1465	ENSMUSG00000055560, ENSMUSG00000058246
	linc1490	ENSMUSG00000061544
	linc1506	ENSMUSG00000036792
	linc1540	ENSMUSG00000079065
	linc1559	ENSMUSG00000072704
	linc1562	ENSMUSG00000053367
	linc1563	ENSMUSG00000057093, ENSMUSG00000037640, ENSMUSG00000030604, ENSMUSG00000030604, ENSMUSG00000030604, ENSMUSG00000078779, ENSMUSG00000078779, ENSMUSG00000078779, ENSMUSG00000020420, ENSMUSG00000070709, ENSMUSG00000070709, ENSMUSG00000070709, ENSMUSG00000070709, ENSMUSG00000063047, ENSMUSG00000063047, ENSMUSG00000063047, ENSMUSG00000063047, ENSMUSG00000096916
	linc1581	ENSMUSG00000052446
	linc1589	ENSMUSG00000032425
	linc1604	ENSMUSG00000078640
	linc1618	ENSMUSG00000097187
	linc1622	ENSMUSG00000038598
	linc1633	ENSMUSG00000095026
