# Supplementary material for: Extensive microRNA-mediated crosstalk between lncRNAs and mRNAs in mouse embryonic stem cells
Source: HighWire-hosted journal article supplement (doi:10.1101/gr.181974.114), 2015-03-19
Supplement: Supplemental_TableS5.xlsx [file Supplemental_TableS5.xlsx]

## Sheet: lnceRNAs
Supplementary table S5. Pairwise correlation coefficient between lncRNAs and their ceRNAts and miRNA-independent targets.
Pairwise correlation coefficient (R) of (Sheet 1) 53 lnceRNAs and (Sheet 2) 51 non-lnceRNAs with their ceRNAts (red) and miRNA-independent target mRNAs (grey). The median correlation coefficient for each lncRNA with their respective ceRNAts and miRNA-independent targets is compared to a distribution of randomly sampled (n=1,000) gene sets of the same size.
	lnceRNA	ceRNAts		miRNA-independent target mRNAs
		Median correlation coefficient (R)	Median empirical p value	Median correlation coefficient (R)	Median empirical p value
	linc1230	0.191836	0.039	0.0410029	0.641
	linc1235	0.67264	0.021	0.0193647	0.624
	linc1239	0.294203	0.033	0.176268	0.374
	linc1245	0.665496	0	0.173341	0.001
	linc1256	0.403762	0	-0.274873	0.91
	linc1267	0.152346	0.001	0.430236	0.002
	linc1270	0.105494	0.022	0.27137	0.193
	linc1281	0.721653	0	0.536925	0.113
	linc1282	0.606396	0.041	0.199132	0.271
	linc1283	0.644896	0.027	0.393366	0.138
	linc1296	0.620952	0.041	0.161036	0.214
	linc1307	0.046374	0.041	0.0650551	0.134
	linc1312	0.529878	0.032	0.315011	0.159
	linc1315	0.53422	0	0.305946	0.069
	linc1316	0.140872	0.046	-0.214102	0.967
	linc1335	0.334121	0.01	0.157089	0.42
	linc1347	0.556356	0.044	-0.0182075	0.115
	linc1354	0.161386	0.045	0.176229	0.536
	linc1356	0.252047	0	-0.0556998	0.893
	linc1366	0.292486	0.016	0.0240845	0.662
	linc1385	0.406787	0.048	0.199862	0.273
	linc1390	0.0636011	0.019	0.48725	0.07
	linc1391	0.693418	0.037	0.0421134	0.547
	linc1393	0.400859	0.028	-0.0522518	0.188
	linc1405	0.769998	0.005	0.00587259	0.4
	linc1410	0.585869	0	-0.0216767	0.098
	linc1413	0.974169	0.009	-0.136813	0.83
	linc1427	0.111828	0.022	-0.0319711	0.965
	linc1448	0.212383	0.049	-0.517819	1
	linc1454	0.346747	0	-0.409372	0.74
	linc1457	0.301757	0.05	0.230893	0.11
	linc1463	0.252341	0.041	0.00815994	0.174
	linc1470	0.333902	0.049	-0.457938	0.962
	linc1471	0.174399	0.038	0.529926	0
	linc1483	0.61615	0.044	0.180038	0.467
	linc1503	0.32641	0.022	0.110983	0.055
	linc1505	0.751103	0	0.237363	0.721
	linc1510	0.662762	0.038	0.186953	0.062
	linc1524	0.367182	0.015	0.209594	0.538
	linc1537	0.492511	0.038	0.355106	0.118
	linc1547	0.327776	0.045	-0.0765749	1
	linc1552	0.503988	0.042	-0.61857	1
	linc1555	0.283744	0.038	0.526933	0.005
	linc1557	0.218122	0.01	-0.182388	0.348
	linc1582	0.182079	0.038	-0.0553789	0.547
	linc1611	0.273572	0.037	0.152724	0.626
	linc1615	0.154535	0.045	0.404087	0.067
	linc1617	0.323824	0.048	-0.222856	0.346
	linc1621	0.610983	0.036	-0.0279109	0.008
	linc1623	0.105957	0.04	0.153097	0.542
	linc1626	0.389386	0.014	0.366674	0.004
	linc1627	0.656498	0.047	0.356803	0.011
	linc1635	0.597372	0	0.32348	0.006

## Sheet: non-lnceRNAs
	Non-lnceRNAs	ceRNAts		miRNA-independent target mRNAs
		Median correlation coefficient (R)	Median empirical p value	Median correlation coefficient (R)	Median empirical p value
	linc1242	-0.210215	0.902	0.0999212	0.766
	linc1244	-0.220582	0.95	-0.142919	0.86
	linc1252	-0.106794	0.456	-0.0461704	0.401
	linc1253	-0.422867	0.952	-0.256868	0.769
	linc1260	-0.0984483	0.316	0.0932201	0.027
	linc1261	-0.712884	1	-0.00152792	0.145
	linc1262	-0.532906	1	-0.448462	1
	linc1290	-0.45892	1	-0.139613	0.779
	linc1300	-0.255491	0.967	-0.147465	0.777
	linc1304	0.0176071	0.36	-0.293207	0.749
	linc1317	0.254129	0.381	0.633106	0.107
	linc1327	-0.185165	0.683	-0.361721	1
	linc1331	0.0685608	0.356	-0.498973	1
	linc1338	-0.242407	0.58	-0.000677165	0.026
	linc1346	0.225145	0.465	0.188404	0.601
	linc1361	-0.0261198	0.447	-0.382219	0.971
	linc1368	0.0461971	0.188	-0.364924	0.892
	linc1369	-0.625767	1	-0.287296	0.93
	linc1388	0.0554914	0.673	-0.00588801	0.766
	linc1400	0.0704201	0.13	-0.136016	0.521
	linc1411	-0.463814	1	-0.419323	1
	linc1412	-0.0788502	0.302	-0.229224	0.613
	linc1418	0.26669	0.266	0.145019	1
	linc1419	-0.210544	0.89	0.0716049	0.751
	linc1421	-0.527407	0.966	-0.182554	0.839
	linc1422	-0.209748	0.654	-0.0973585	0.504
	linc1428	-0.617474	0.975	-0.161123	0.231
	linc1450	-0.682568	1	-0.57439	1
	linc1468	-0.0449798	0.255	0.0174161	0.228
	linc1473	-0.0062125	0.321	-0.122299	0.541
	linc1477	-0.454118	0.952	-0.0593322	0.645
	linc1517	-0.342047	0.709	-0.441257	1
	linc1536	-0.0458112	0.914	-0.231871	1
	linc1543	-0.689304	1	-0.202019	0.683
	linc1558	-0.726539	1	-0.221826	0.65
	linc1572	-0.364939	0.672	-0.192673	0.455
	linc1596	-0.671028	1	0.0995054	0.238
	linc1599	-0.180235	0.496	0.141568	0.057
	linc1600	0.177525	0.268	0.145169	0.173
	linc1601	-0.606464	1	-0.502198	1
	linc1602	-0.600278	1	-0.369052	1
	linc1603	-0.363611	0.978	-0.261633	0.976
	linc1607	0.0614826	0.6	-0.00818488	0.991
	linc1612	-0.102709	0.872	0.0498982	0.863
	linc1613	-0.16702	0.502	-0.213466	0.686
	linc1614	-0.541403	0.81	-0.415016	1
	linc1616	-0.000154704	0.499	0.0125829	0.26
	linc1629	-0.734029	1	-0.00306839	0.232
	linc1631	-0.503453	0.873	-0.262691	0.805
	linc1632	-0.64966	1	-0.502754	1
	linc1634	0.106832	0.424	-0.179897	0.908
		-0.210544
