# Supplementary material for: Extensive microRNA-mediated crosstalk between lncRNAs and mRNAs in mouse embryonic stem cells
Source: HighWire-hosted journal article supplement (doi:10.1101/gr.181974.114), 2015-03-19
Supplement: Supplemental_TableS6.xlsx [file Supplemental_TableS6.xlsx]

## Sheet: All mESC lnceRNAs
Supplementary table S6. Relative expression levels in the cytoplasmic and nuclear subcellular fractions of mESC lncRNAs.
Relative expression levels of mESC-expressed lncRNAs, 53 lnceRNAs (red) and 51 non-lnceRNAs (grey), in the cytoplasmic (FPKM) and nuclear (FPKM) subcellular fractions.
	lncRNAs	Ratio (Cytoplasm FPKM/ Nuclear FPKM)
	linc1230	0.83449
	linc1235	0
	linc1239	0.383496
	linc1245	0.0556327
	linc1256	0.497609
	linc1267	0.0674336
	linc1270	0.622129
	linc1281	0.988672
	linc1282	0.370885
	linc1283	0.556327
	linc1296	0.892354
	linc1307	0.368214
	linc1312	0.649048
	linc1315	0.919149
	linc1316	0.429272
	linc1335	2.67037
	linc1347	0.532139
	linc1354	1.13145
	linc1356	0.68471
	linc1366	1.37757
	linc1385	0.255498
	linc1390	2
	linc1391	1.01728
	linc1393	1.24637
	linc1405	0.359084
	linc1410	0.141852
	linc1413	0.990719
	linc1427	0.728033
	linc1448	0.264918
	linc1454	1.14913
	linc1457	0
	linc1463	0.682765
	linc1470	0.598402
	linc1471	0.787642
	linc1483	2
	linc1503	0.513101
	linc1505	1.85286
	linc1510	0.450341
	linc1524	0.500586
	linc1537	0.604726
	linc1547	0.276672
	linc1552	0.0745064
	linc1555	0.427584
	linc1557	0.487949
	linc1582	0.878923
	linc1611	1.06191
	linc1615	0.5949
	linc1617	0.75799
	linc1621	0.676179
	linc1623	0.045696
	linc1626	1.77612
	linc1627	0.570112
	linc1635	0
	linc1242	0.699168
	linc1244	0.202301
	linc1252	0.6484
	linc1253	0.478864
	linc1260	0.29175
	linc1261	0.876215
	linc1262	0.225538
	linc1290	0.730698
	linc1300	0.989026
	linc1304	1.11265
	linc1317	0.258538
	linc1327	0.130551
	linc1331	0.429445
	linc1338	0.211934
	linc1346	0.311543
	linc1361	0.222531
	linc1368	0.184305
	linc1369	0.191676
	linc1388	0.306939
	linc1400	0.278163
	linc1411	0.774494
	linc1412	0.87208
	linc1418	0
	linc1419	0.370885
	linc1421	0.296708
	linc1422	0.17897
	linc1428	0.83449
	linc1450	0.528848
	linc1468	0.480273
	linc1473	0.283618
	linc1477	0.194843
	linc1517	0.0839739
	linc1536	0.576196
	linc1543	0.921592
	linc1558	0.59664
	linc1572	0.246373
	linc1596	0.397376
	linc1599	0.556327
	linc1600	0.247256
	linc1601	0.678447
	linc1602	0.357639
	linc1603	0.587817
	linc1607	3.33796
	linc1612	0.247256
	linc1613	0.656868
	linc1614	0.735483
	linc1616	0.667592
	linc1629	0.222531
	linc1631	1.11265
	linc1632	0.370885
	linc1634	0.211934
