# Supplementary material for: Extensive microRNA-mediated crosstalk between lncRNAs and mRNAs in mouse embryonic stem cells
Source: HighWire-hosted journal article supplement (doi:10.1101/gr.181974.114), 2015-03-19
Supplement: Supplemental_TableS7.xlsx [file Supplemental_TableS7.xlsx]

## Sheet: Human conserved lnceRNAs
Supplementary table S7. Human conserved lnceRNAs.
Genomic coordinates in mouse (mm9) human (hg19) of conserved lnceRNAs. Conserved lnceRNAs in human were estimated using human H1 embryonic stem cell RNAseq data (Bernstein et al. 2012) with at least 20% of the syntenic mouse transcript covered by 5 or more reads
lnceRNA	Mouse lnceRNAs (mm9)	Human lnceRNAs (hg19)
	Genomic coordinates	Genomic coordinates	Number of reads
linc1239	chr1:162933175-162936722(-)	chr1:173868905-173872330(+)	892
linc1267	chr11:120049396-120050818(-)	chr17:79317799-79319476(-)	7
linc1270	chr12:72110268-72116930(-)	chr14:58763633-58764846(-)	373
linc1307	chr17:35086206-35090401(-)	chr6:31803187-31805059(+)	5808
linc1316	chr18:75518147-75526822(-)	chr18:46478702-46489126(+)	5
linc1347	chr5:23203260-23218473(-)	chr7:22894379-22896175(+)	116
linc1354	chr5:100848961-100859422(-)	chr4:83816845-83822167(-)	1299
linc1385	chr7:67113886-67120883(-)	chr15:25240479-25247484(+)	7199
linc1390	chr8:37604721-37608880(-)	chr19:5576754-5576963(+)	122
linc1391	chr8:59966768-59969609(-)	chr4:174291124-174291851(+)	19
linc1393	chr8:67551222-67562049(-)	chr4:165798087-165817519(+)	9090
linc1410	chrX:50407668-50410215(-)	chrX:133681158-133683623(-)	11
linc1412	chrX:102234195-102265437(-)	chrX:75364668-75365145(-)	10
linc1552	chr6:86477160-86515273(+)	chr2:70278381-70313556(-)	1368
linc1558	chr6:128389009-128393776(+)	chr12:2903163-2903908(-)	18
linc1562	chr7:6222066-6234211(+)	chr19:56807164-56821895(+)	32
linc1582	chr8:89996652-90050351(+)	chr16:49316028-49372821(+)	20
linc1623	chr4:99320307-99322058(-)	chr1:63786321-63787459(-)	4431
linc1626	chr5:115653674-115655290(+)	chr12:121068161-121069024(-)	21
