# Supplementary material for: Extensive microRNA-mediated crosstalk between lncRNAs and mRNAs in mouse embryonic stem cells
Source: HighWire-hosted journal article supplement (doi:10.1101/gr.181974.114), 2015-03-19
Supplement: Supplemental_TableS8.xlsx [file Supplemental_TableS8.xlsx]

## Sheet: lncRNAs
Supplementary table S8. Density of MREs predicted within lncRNAs and protein-coding transcripts for the top 25% most highly expressed miRNAs in mESCs.
lncRNA	Length (kb)	Number of MREs	MRE density (sites/kb)	ESC miRNAs
linc1230	0.464	8	17.2414	mmu-miR-484; mmu-miR-103; mmu-miR-335-3p; mmu-miR-145; mmu-miR-760-3p; mmu-miR-369-3p; mmu-miR-741
linc1235	0.106	2	18.8679	mmu-miR-205; mmu-miR-713
linc1239	2.976	83	27.8898	mmu-miR-495; mmu-miR-29b; mmu-miR-93; mmu-miR-804; mmu-miR-335-5p; mmu-miR-96; mmu-miR-130a; mmu-miR-19a; mmu-miR-130b; mmu-miR-20a; mmu-miR-291a-5p; mmu-miR-323-3p; mmu-miR-434-3p; mmu-miR-29c; mmu-miR-205; mmu-miR-291b-5p; mmu-miR-132; mmu-miR-669o-3p; mmu-miR-34a; mmu-miR-27a; mmu-miR-468; mmu-miR-182; mmu-miR-106a; mmu-miR-17; mmu-miR-202-3p; mmu-miR-19b; mmu-miR-669a-3p; mmu-miR-195; mmu-miR…
linc1242	1.407	23	16.3468	mmu-miR-195; mmu-miR-145; mmu-miR-124; mmu-miR-713; mmu-miR-872; mmu-miR-16; mmu-miR-760-5p; mmu-miR-484; mmu-miR-291a-5p; mmu-miR-134; mmu-miR-291b-5p; mmu-miR-376a; mmu-miR-15a; mmu-miR-27a; mmu-miR-1983; mmu-miR-468; mmu-miR-1224; mmu-miR-26b; mmu-miR-154; mmu-miR-26a; mmu-miR-15b
linc1244	0.458	13	28.3843	mmu-miR-434-3p; mmu-miR-297c; mmu-miR-376a; mmu-miR-136; mmu-miR-1198-5p; mmu-miR-466g; mmu-miR-193b; mmu-miR-669d; mmu-miR-484; mmu-miR-381; mmu-miR-297a; mmu-miR-292-5p; mmu-miR-377
linc1245	1.533	16	10.4371	mmu-miR-330; mmu-miR-1945; mmu-miR-804; mmu-miR-335-5p; mmu-miR-96; mmu-miR-466g; mmu-miR-484; mmu-miR-672; mmu-miR-142-5p; mmu-miR-340-5p; mmu-miR-762; mmu-miR-1935; mmu-miR-741; mmu-miR-377
linc1252	2.401	58	24.1566	mmu-miR-467e; mmu-miR-145; mmu-miR-804; mmu-miR-335-5p; mmu-miR-130a; mmu-miR-431; mmu-miR-130b; mmu-miR-674; mmu-miR-340-5p; mmu-miR-434-3p; mmu-miR-181a; mmu-miR-669f-3p; mmu-let-7a; mmu-miR-27a; mmu-miR-191; mmu-miR-1198-5p; mmu-miR-467h; mmu-miR-182; mmu-miR-129-2-3p; mmu-miR-202-3p; mmu-miR-1952; mmu-miR-154; mmu-miR-129-1-3p; mmu-miR-423-5p; mmu-let-7g; mmu-miR-124; mmu-miR-1960; mmu-miR-29…
linc1253	2.436	51	20.936	mmu-miR-495; mmu-miR-145; mmu-miR-804; mmu-miR-200b; mmu-miR-150; mmu-miR-674; mmu-miR-291a-5p; mmu-miR-205; mmu-miR-155; mmu-miR-291b-5p; mmu-miR-27a; mmu-miR-381; mmu-miR-1952; mmu-miR-423-5p; mmu-miR-195; mmu-miR-148b; mmu-miR-1960; mmu-miR-297c; mmu-miR-429; mmu-miR-136; mmu-miR-125a-5p; mmu-miR-16; mmu-miR-148a; mmu-miR-669d; mmu-miR-484; mmu-miR-125b-5p; mmu-miR-23b; mmu-miR-741; mmu-miR-37…
linc1256	5.094	116	22.7719	mmu-miR-495; mmu-miR-145; mmu-miR-713; mmu-miR-335-5p; mmu-miR-96; mmu-miR-340-5p; mmu-miR-466b-3p; mmu-miR-30d; mmu-miR-30a; mmu-miR-434-3p; mmu-miR-21; mmu-miR-29c; mmu-miR-669f-3p; mmu-let-7a; mmu-miR-541; mmu-miR-202-3p; mmu-miR-672; mmu-miR-381; mmu-miR-466a-3p; mmu-let-7g; mmu-miR-195; mmu-miR-433; mmu-miR-148b; mmu-miR-669l; mmu-miR-136; mmu-miR-1198-3p; mmu-miR-148a; mmu-miR-669f-5p; mmu-…
linc1260	3.721	91	24.4558	mmu-miR-495; mmu-miR-145; mmu-miR-93; mmu-miR-804; mmu-miR-96; mmu-miR-130a; mmu-miR-466g; mmu-miR-130b; mmu-miR-674; mmu-miR-20a; mmu-miR-467f; mmu-miR-340-5p; mmu-miR-323-3p; mmu-miR-21; mmu-miR-290-3p; mmu-miR-205; mmu-miR-155; mmu-miR-132; mmu-miR-669o-3p; mmu-miR-467a; mmu-miR-27a; mmu-miR-541; mmu-miR-182; mmu-miR-106a; mmu-miR-103; mmu-miR-17; mmu-miR-129-2-3p; mmu-miR-26b; mmu-miR-421; mm…
linc1261	1.26	34	26.9841	mmu-miR-195; mmu-miR-142-3p; mmu-miR-297c; mmu-miR-335-5p; mmu-miR-16; mmu-miR-23b; mmu-miR-296-5p; mmu-miR-34c; mmu-miR-330; mmu-miR-335-3p; mmu-miR-205; mmu-miR-134; mmu-miR-34a; mmu-miR-15a; mmu-miR-532-5p; mmu-miR-103; mmu-miR-129-2-3p; mmu-miR-1224; mmu-miR-381; mmu-miR-129-1-3p; mmu-miR-297a; mmu-miR-15b; mmu-miR-23a; mmu-miR-292-5p; mmu-miR-423-5p
linc1262	0.61	8	13.1148	mmu-miR-669a-3p; mmu-miR-495; mmu-miR-335-3p; mmu-miR-129-2-3p; mmu-miR-669o-3p; mmu-miR-421; mmu-miR-129-1-3p
linc1267	0.494	4	8.09717	mmu-miR-330; mmu-miR-350; mmu-miR-335-3p; mmu-miR-741
linc1270	1.332	18	13.5135	mmu-miR-200a; mmu-miR-804; mmu-miR-429; mmu-miR-200b; mmu-miR-1198-3p; mmu-miR-369-3p; mmu-miR-340-5p; mmu-miR-141; mmu-miR-181a; mmu-miR-205; mmu-miR-335-3p; mmu-miR-760-3p; mmu-miR-193b; mmu-miR-1983; mmu-miR-1224; mmu-miR-200c; mmu-miR-1952
linc1281	1.469	42	28.5909	mmu-miR-145; mmu-miR-130a; mmu-miR-200b; mmu-miR-466g; mmu-miR-19a; mmu-miR-130b; mmu-miR-369-3p; mmu-miR-467f; mmu-miR-434-3p; mmu-miR-669o-5p; mmu-miR-205; mmu-let-7a; mmu-miR-27a; mmu-miR-541; mmu-miR-202-3p; mmu-miR-19b; mmu-let-7g; mmu-miR-466a-3p; mmu-miR-148b; mmu-miR-669l; mmu-miR-429; mmu-miR-374; mmu-miR-148a; mmu-miR-669d; mmu-miR-669f-5p; mmu-miR-484; mmu-let-7c; mmu-miR-152; mmu-miR-…
linc1282	0.764	10	13.089	mmu-miR-669a-3p; mmu-miR-434-3p; mmu-miR-205; mmu-miR-669o-3p; mmu-miR-335-5p; mmu-miR-150; mmu-miR-674; mmu-miR-467f; mmu-miR-292-5p
linc1283	1.024	39	38.0859	mmu-miR-804; mmu-miR-713; mmu-miR-466g; mmu-miR-467c; mmu-miR-150; mmu-miR-30d; mmu-miR-296-5p; mmu-miR-323-3p; mmu-miR-30a; mmu-miR-669o-5p; mmu-miR-290-3p; mmu-miR-467a; mmu-miR-30b; mmu-miR-1198-5p; mmu-miR-26b; mmu-miR-1952; mmu-miR-292-3p; mmu-miR-302a; mmu-miR-302d; mmu-miR-124; mmu-miR-297c; mmu-miR-350; mmu-miR-136; mmu-miR-295; mmu-miR-720; mmu-miR-762; mmu-miR-377; mmu-miR-291b-3p; mmu-…
linc1290	1.342	28	20.8644	mmu-miR-195; mmu-miR-713; mmu-miR-136; mmu-miR-16; mmu-miR-466g; mmu-miR-669d; mmu-miR-19a; mmu-miR-484; mmu-miR-150; mmu-miR-467f; mmu-miR-23b; mmu-miR-741; mmu-miR-377; mmu-miR-28; mmu-miR-330; mmu-miR-15a; mmu-miR-378; mmu-miR-129-2-3p; mmu-miR-129-1-3p; mmu-miR-15b; mmu-miR-23a; mmu-miR-19b
linc1296	0.807	22	27.2615	mmu-miR-669a-3p; mmu-let-7g; mmu-miR-495; mmu-miR-29b; mmu-miR-145; mmu-miR-669l; mmu-miR-374; mmu-miR-669f-5p; mmu-miR-674; mmu-miR-369-3p; mmu-miR-340-5p; mmu-let-7c; mmu-miR-434-3p; mmu-miR-29a; mmu-miR-29c; mmu-miR-760-3p; mmu-let-7a; mmu-miR-669o-3p; mmu-miR-669a-5p; mmu-miR-103; mmu-let-7e; mmu-miR-423-5p
linc1300	0.395	7	17.7215	mmu-miR-376b; mmu-miR-182; mmu-miR-350; mmu-miR-760-3p; mmu-miR-1935; mmu-miR-136; mmu-miR-423-5p
linc1304	1.103	21	19.039	mmu-miR-1960; mmu-miR-148b; mmu-miR-124; mmu-miR-429; mmu-miR-96; mmu-miR-200b; mmu-miR-431; mmu-miR-148a; mmu-miR-669d; mmu-miR-150; mmu-miR-674; mmu-miR-28; mmu-miR-152; mmu-miR-760-3p; mmu-miR-134; mmu-miR-543; mmu-miR-1224; mmu-miR-200c; mmu-miR-1952; mmu-miR-292-5p
linc1307	1.097	36	32.8168	mmu-miR-302d; mmu-miR-195; mmu-miR-1960; mmu-miR-148b; mmu-miR-429; mmu-miR-200b; mmu-miR-16; mmu-miR-148a; mmu-miR-295; mmu-miR-762; mmu-miR-296-5p; mmu-miR-1196; mmu-miR-330; mmu-miR-152; mmu-miR-21; mmu-miR-335-3p; mmu-miR-205; mmu-miR-760-3p; mmu-miR-15a; mmu-miR-532-5p; mmu-miR-129-2-3p; mmu-miR-291a-3p; mmu-miR-200c; mmu-miR-129-1-3p; mmu-miR-302a; mmu-miR-15b; mmu-miR-466f; mmu-miR-423-5p;…
linc1312	0.258	8	31.0078	mmu-miR-433; mmu-miR-760-3p; mmu-miR-27a; mmu-miR-1983; mmu-miR-202-3p; mmu-miR-142-5p; mmu-miR-340-5p; mmu-miR-467f
linc1315	0.818	17	20.7824	mmu-let-7g; mmu-miR-495; mmu-miR-350; mmu-miR-125a-5p; mmu-miR-760-5p; mmu-miR-125b-5p; mmu-let-7c; mmu-miR-741; mmu-miR-330; mmu-let-7a; mmu-miR-132; mmu-miR-134; mmu-miR-760-3p; mmu-let-7e; mmu-miR-1983; mmu-miR-421; mmu-miR-1935
linc1316	2.457	50	20.35	mmu-miR-804; mmu-miR-335-5p; mmu-miR-200b; mmu-miR-467c; mmu-miR-291a-5p; mmu-miR-28; mmu-miR-181a; mmu-miR-205; mmu-miR-291b-5p; mmu-miR-34a; mmu-miR-27a; mmu-miR-103; mmu-miR-1983; mmu-miR-129-2-3p; mmu-miR-672; mmu-miR-381; mmu-miR-1952; mmu-miR-129-1-3p; mmu-miR-669l; mmu-miR-429; mmu-miR-136; mmu-miR-125a-5p; mmu-miR-760-5p; mmu-miR-669f-5p; mmu-miR-484; mmu-miR-125b-5p; mmu-miR-18b; mmu-miR…
linc1317	3.205	74	23.0889	mmu-miR-200a; mmu-miR-467e; mmu-miR-29b; mmu-miR-93; mmu-miR-713; mmu-miR-335-5p; mmu-miR-150; mmu-miR-20a; mmu-miR-467f; mmu-miR-296-5p; mmu-miR-291a-5p; mmu-miR-181a; mmu-miR-29c; mmu-miR-290-3p; mmu-miR-205; mmu-miR-669f-3p; mmu-miR-543; mmu-miR-291b-5p; mmu-miR-467a; mmu-miR-27a; mmu-miR-191; mmu-miR-1198-5p; mmu-miR-467h; mmu-miR-541; mmu-miR-468; mmu-miR-1983; mmu-miR-182; mmu-miR-106a; mmu…
linc1327	3.424	80	23.3645	mmu-miR-495; mmu-miR-145; mmu-miR-713; mmu-miR-335-5p; mmu-miR-466g; mmu-miR-431; mmu-miR-467c; mmu-miR-19a; mmu-miR-340-5p; mmu-miR-296-5p; mmu-miR-28; mmu-miR-21; mmu-miR-290-3p; mmu-miR-669f-3p; mmu-let-7a; mmu-miR-468; mmu-miR-202-3p; mmu-miR-381; mmu-miR-292-3p; mmu-miR-302a; mmu-miR-302d; mmu-let-7g; mmu-miR-433; mmu-miR-124; mmu-miR-148b; mmu-miR-136; mmu-miR-125a-5p; mmu-miR-760-5p; mmu-m…
linc1331	0.321	3	9.34579	mmu-miR-468; mmu-miR-674; mmu-miR-423-3p
linc1335	0.25	2	8	mmu-miR-433; mmu-miR-1952
linc1338	0.623	13	20.8668	mmu-miR-467e; mmu-miR-145; mmu-miR-760-3p; mmu-miR-669f-3p; mmu-miR-27a; mmu-miR-136; mmu-miR-872; mmu-miR-532-5p; mmu-miR-467h; mmu-miR-26b; mmu-miR-329; mmu-miR-381; mmu-miR-26a
linc1346	3.024	53	17.5265	mmu-miR-200a; mmu-miR-145; mmu-miR-713; mmu-miR-335-5p; mmu-miR-96; mmu-miR-466g; mmu-miR-150; mmu-miR-674; mmu-miR-369-3p; mmu-miR-367; mmu-let-7a; mmu-miR-34a; mmu-miR-27a; mmu-miR-541; mmu-miR-1983; mmu-miR-182; mmu-miR-202-3p; mmu-miR-1952; mmu-miR-423-5p; mmu-let-7g; mmu-miR-32; mmu-miR-1960; mmu-miR-669l; mmu-miR-136; mmu-miR-125a-5p; mmu-miR-669f-5p; mmu-miR-363-3p; mmu-miR-125b-5p; mmu-mi…
linc1347	3.446	80	23.2153	mmu-miR-495; mmu-miR-467e; mmu-miR-29b; mmu-miR-145; mmu-miR-713; mmu-miR-335-5p; mmu-miR-96; mmu-miR-467c; mmu-miR-150; mmu-miR-674; mmu-miR-369-3p; mmu-miR-340-5p; mmu-miR-30d; mmu-miR-30a; mmu-miR-28; mmu-miR-669o-5p; mmu-miR-29c; mmu-miR-290-3p; mmu-miR-205; mmu-miR-132; mmu-miR-669o-3p; mmu-miR-467a; mmu-miR-27a; mmu-miR-30b; mmu-miR-191; mmu-miR-467h; mmu-miR-103; mmu-miR-1983; mmu-miR-129-…
linc1354	1.572	33	20.9924	mmu-miR-302d; mmu-miR-495; mmu-miR-467e; mmu-miR-350; mmu-miR-29b; mmu-miR-467c; mmu-miR-19a; mmu-miR-150; mmu-miR-295; mmu-miR-466b-3p; mmu-miR-377; mmu-miR-466c-3p; mmu-miR-434-3p; mmu-miR-291b-3p; mmu-miR-335-3p; mmu-miR-290-3p; mmu-miR-29a; mmu-miR-29c; mmu-miR-543; mmu-miR-1893; mmu-miR-467a; mmu-miR-467h; mmu-miR-423-3p; mmu-miR-291a-3p; mmu-miR-1224; mmu-miR-142-5p; mmu-miR-292-3p; mmu-miR…
linc1356	0.469	6	12.7932	mmu-miR-34c; mmu-miR-145; mmu-miR-34a; mmu-miR-125b-5p; mmu-miR-27a; mmu-miR-125a-5p
linc1361	0.986	10	10.142	mmu-miR-434-3p; mmu-miR-467e; mmu-miR-382; mmu-miR-191; mmu-miR-532-5p; mmu-miR-467h; mmu-miR-466g; mmu-miR-431; mmu-miR-1198-3p; mmu-miR-103
linc1366	1.21	30	24.7934	mmu-miR-29b; mmu-miR-145; mmu-miR-124; mmu-miR-760-5p; mmu-miR-466g; mmu-miR-431; mmu-miR-484; mmu-miR-150; mmu-miR-23b; mmu-miR-762; mmu-miR-296-5p; mmu-miR-291a-5p; mmu-miR-34c; mmu-miR-330; mmu-miR-29a; mmu-miR-29c; mmu-miR-335-3p; mmu-miR-760-3p; mmu-miR-132; mmu-miR-291b-5p; mmu-miR-34a; mmu-miR-183; mmu-miR-1224; mmu-miR-23a; mmu-miR-292-5p
linc1368	0.964	24	24.8963	mmu-let-7g; mmu-miR-433; mmu-miR-145; mmu-miR-429; mmu-miR-200b; mmu-miR-674; mmu-miR-30d; mmu-let-7c; mmu-miR-30a; mmu-miR-28; mmu-miR-101b; mmu-miR-669o-5p; mmu-miR-330; mmu-miR-21; mmu-miR-155; mmu-let-7a; mmu-miR-382; mmu-miR-30b; mmu-miR-1983; mmu-let-7e; mmu-miR-200c; mmu-miR-33; mmu-miR-1935
linc1369	1.394	26	18.6514	mmu-miR-350; mmu-miR-29b; mmu-miR-96; mmu-miR-760-5p; mmu-miR-19a; mmu-miR-18b; mmu-miR-1196; mmu-miR-669o-5p; mmu-miR-21; mmu-miR-330; mmu-miR-205; mmu-miR-29a; mmu-miR-29c; mmu-miR-760-3p; mmu-miR-132; mmu-miR-382; mmu-miR-27a; mmu-miR-541; mmu-miR-182; mmu-miR-202-3p; mmu-miR-421; mmu-miR-381; mmu-miR-33; mmu-miR-19b
linc1385	3.188	88	27.6035	mmu-miR-495; mmu-miR-29b; mmu-miR-145; mmu-miR-96; mmu-miR-200b; mmu-miR-466g; mmu-miR-431; mmu-miR-369-3p; mmu-miR-467f; mmu-miR-340-5p; mmu-miR-466b-3p; mmu-miR-30d; mmu-miR-30a; mmu-miR-21; mmu-miR-181a; mmu-miR-29c; mmu-miR-155; mmu-miR-669f-3p; mmu-miR-543; mmu-let-7a; mmu-miR-132; mmu-miR-669o-3p; mmu-miR-27a; mmu-miR-30b; mmu-miR-1198-5p; mmu-miR-182; mmu-miR-381; mmu-miR-1952; mmu-miR-669…
linc1388	0.238	10	42.0168	mmu-miR-195; mmu-miR-484; mmu-miR-350; mmu-miR-329; mmu-miR-1952; mmu-miR-27a; mmu-miR-15a; mmu-miR-16; mmu-miR-15b; mmu-miR-101b
linc1390	0.629	13	20.6677	mmu-miR-466c-3p; mmu-miR-466a-3p; mmu-miR-195; mmu-miR-205; mmu-miR-669f-3p; mmu-miR-15a; mmu-miR-136; mmu-miR-16; mmu-miR-467f; mmu-miR-381; mmu-miR-466b-3p; mmu-miR-15b
linc1391	0.4	10	25	mmu-miR-205; mmu-miR-293; mmu-miR-136; mmu-miR-484; mmu-miR-129-2-3p; mmu-miR-720; mmu-miR-762; mmu-miR-129-1-3p; mmu-miR-466f
linc1393	1.525	35	22.9508	mmu-miR-200a; mmu-miR-467e; mmu-miR-669l; mmu-miR-429; mmu-miR-872; mmu-miR-200b; mmu-miR-19a; mmu-miR-669f-5p; mmu-miR-150; mmu-miR-674; mmu-miR-340-5p; mmu-miR-762; mmu-miR-741; mmu-miR-323-3p; mmu-miR-141; mmu-miR-669o-5p; mmu-miR-669a-5p; mmu-miR-22; mmu-miR-1198-5p; mmu-miR-532-5p; mmu-miR-467h; mmu-miR-183; mmu-miR-129-2-3p; mmu-miR-200c; mmu-miR-26b; mmu-miR-672; mmu-miR-129-1-3p; mmu-miR-…
linc1400	2.088	38	18.1992	mmu-miR-302d; mmu-miR-433; mmu-miR-200a; mmu-miR-495; mmu-miR-297c; mmu-miR-145; mmu-miR-669l; mmu-miR-431; mmu-miR-669d; mmu-miR-669f-5p; mmu-miR-295; mmu-miR-340-5p; mmu-miR-23b; mmu-miR-296-5p; mmu-miR-141; mmu-miR-669o-5p; mmu-miR-330; mmu-miR-205; mmu-miR-760-3p; mmu-miR-132; mmu-miR-669a-5p; mmu-miR-378; mmu-miR-291a-3p; mmu-miR-1224; mmu-miR-1935; mmu-miR-297a; mmu-miR-23a; mmu-miR-302a; m…
linc1405	5.419	120	22.1443	mmu-miR-145; mmu-miR-335-5p; mmu-miR-466g; mmu-miR-431; mmu-miR-340-5p; mmu-miR-466b-3p; mmu-miR-30d; mmu-miR-323-3p; mmu-miR-30a; mmu-miR-434-3p; mmu-miR-29c; mmu-miR-669f-3p; mmu-miR-541; mmu-miR-468; mmu-miR-129-2-3p; mmu-miR-381; mmu-miR-154; mmu-miR-129-1-3p; mmu-miR-302a; mmu-miR-466a-3p; mmu-miR-302d; mmu-miR-195; mmu-miR-136; mmu-miR-125a-5p; mmu-miR-760-5p; mmu-miR-1198-3p; mmu-miR-295; …
linc1410	1.806	25	13.8427	mmu-miR-669a-3p; mmu-miR-433; mmu-miR-142-3p; mmu-miR-350; mmu-miR-1960; mmu-miR-429; mmu-miR-200b; mmu-miR-431; mmu-miR-340-5p; mmu-miR-101b; mmu-miR-181a; mmu-miR-21; mmu-miR-330; mmu-miR-543; mmu-miR-669o-3p; mmu-miR-376a; mmu-miR-382; mmu-miR-200c; mmu-miR-142-5p; mmu-miR-33; mmu-miR-381
linc1411	2.912	49	16.8269	mmu-miR-145; mmu-miR-93; mmu-miR-96; mmu-miR-130a; mmu-miR-130b; mmu-miR-150; mmu-miR-20a; mmu-miR-467f; mmu-miR-30d; mmu-miR-296-5p; mmu-miR-30a; mmu-miR-30b; mmu-miR-106a; mmu-miR-103; mmu-miR-182; mmu-miR-17; mmu-miR-1952; mmu-miR-148b; mmu-miR-297c; mmu-miR-136; mmu-miR-125a-5p; mmu-miR-148a; mmu-miR-760-5p; mmu-miR-20b; mmu-miR-125b-5p; mmu-miR-377; mmu-miR-152; mmu-miR-134; mmu-miR-760-3p; …
linc1412	0.641	7	10.9204	mmu-miR-1196; mmu-miR-467e; mmu-miR-335-5p; mmu-miR-1952; mmu-miR-741; mmu-miR-467h; mmu-miR-431
linc1413	0.748	27	36.0963	mmu-miR-302d; mmu-miR-195; mmu-miR-350; mmu-miR-16; mmu-miR-466g; mmu-miR-467c; mmu-miR-150; mmu-miR-295; mmu-miR-762; mmu-miR-741; mmu-miR-291b-3p; mmu-miR-669o-5p; mmu-miR-290-3p; mmu-miR-335-3p; mmu-miR-15a; mmu-miR-467a; mmu-miR-291a-3p; mmu-miR-672; mmu-miR-292-3p; mmu-miR-15b; mmu-miR-302a; mmu-miR-294
linc1418	0.1	3	30	mmu-miR-335-3p; mmu-miR-132; mmu-miR-421
linc1419	1.387	25	18.0245	mmu-miR-433; mmu-miR-145; mmu-miR-669l; mmu-miR-804; mmu-miR-466g; mmu-miR-431; mmu-miR-669d; mmu-miR-669f-5p; mmu-miR-340-5p; mmu-miR-18b; mmu-miR-762; mmu-miR-377; mmu-miR-669o-5p; mmu-miR-181a; mmu-miR-330; mmu-miR-543; mmu-miR-669a-5p; mmu-miR-672; mmu-miR-1952; mmu-miR-142-5p; mmu-miR-1935; mmu-miR-292-5p
linc1421	2.154	57	26.4624	mmu-miR-93; mmu-miR-335-5p; mmu-miR-130a; mmu-miR-200b; mmu-miR-466g; mmu-miR-19a; mmu-miR-130b; mmu-miR-674; mmu-miR-369-3p; mmu-miR-20a; mmu-miR-340-5p; mmu-miR-466b-3p; mmu-miR-30d; mmu-miR-323-3p; mmu-miR-30a; mmu-miR-543; mmu-miR-669o-3p; mmu-miR-30b; mmu-miR-106a; mmu-miR-1983; mmu-miR-17; mmu-miR-381; mmu-miR-302a; mmu-miR-19b; mmu-miR-669a-3p; mmu-miR-302d; mmu-miR-124; mmu-miR-148b; mmu-…
linc1422	0.579	6	10.3627	mmu-miR-674; mmu-miR-125b-5p; mmu-miR-125a-5p; mmu-miR-423-3p
linc1427	1.56	35	22.4359	mmu-miR-302d; mmu-miR-195; mmu-miR-200a; mmu-miR-1960; mmu-miR-148b; mmu-miR-335-5p; mmu-miR-16; mmu-miR-760-5p; mmu-miR-148a; mmu-miR-295; mmu-miR-434-3p; mmu-miR-141; mmu-miR-669o-5p; mmu-miR-330; mmu-miR-152; mmu-miR-181a; mmu-miR-205; mmu-miR-760-3p; mmu-miR-543; mmu-miR-132; mmu-miR-378; mmu-miR-15a; mmu-miR-468; mmu-miR-291a-3p; mmu-miR-129-2-3p; mmu-miR-1224; mmu-miR-129-1-3p; mmu-miR-302a…
linc1428	0.375	8	21.3333	mmu-miR-330; mmu-miR-152; mmu-miR-1960; mmu-miR-148b; mmu-miR-183; mmu-miR-148a; mmu-miR-18b; mmu-miR-421
linc1448	0.468	2	4.2735	mmu-miR-495; mmu-miR-804
linc1450	2.591	53	20.4554	mmu-miR-145; mmu-miR-713; mmu-miR-150; mmu-miR-674; mmu-miR-467f; mmu-miR-434-3p; mmu-miR-669o-5p; mmu-miR-205; mmu-miR-34a; mmu-miR-27a; mmu-miR-182; mmu-miR-129-2-3p; mmu-miR-154; mmu-miR-1952; mmu-miR-129-1-3p; mmu-miR-148b; mmu-miR-136; mmu-miR-374; mmu-miR-760-5p; mmu-miR-148a; mmu-miR-484; mmu-miR-23b; mmu-miR-762; mmu-miR-377; mmu-miR-741; mmu-miR-152; mmu-miR-330; mmu-miR-34c; mmu-miR-335…
linc1454	0.687	3	4.36681	mmu-miR-484; mmu-miR-376b; mmu-miR-335-3p
linc1457	0.066	2	30.303	mmu-miR-125b-5p; mmu-miR-125a-5p
linc1463	1.547	29	18.746	mmu-miR-495; mmu-miR-669l; mmu-miR-804; mmu-miR-669f-5p; mmu-miR-18b; mmu-miR-466b-3p; mmu-miR-291a-5p; mmu-miR-377; mmu-miR-101b; mmu-miR-466c-3p; mmu-miR-290-3p; mmu-miR-134; mmu-miR-291b-5p; mmu-miR-669a-5p; mmu-miR-27a; mmu-miR-467a; mmu-miR-532-5p; mmu-miR-183; mmu-miR-468; mmu-miR-103; mmu-miR-376b; mmu-miR-1224; mmu-miR-1952; mmu-miR-292-3p; mmu-miR-421
linc1468	7.645	128	16.743	mmu-miR-495; mmu-miR-93; mmu-miR-335-5p; mmu-miR-466g; mmu-miR-431; mmu-miR-19a; mmu-miR-20a; mmu-miR-340-5p; mmu-miR-466b-3p; mmu-miR-296-5p; mmu-miR-323-3p; mmu-miR-28; mmu-miR-434-3p; mmu-miR-21; mmu-miR-155; mmu-miR-669f-3p; mmu-miR-367; mmu-let-7a; mmu-miR-191; mmu-miR-541; mmu-miR-106a; mmu-miR-17; mmu-miR-129-2-3p; mmu-miR-202-3p; mmu-miR-672; mmu-miR-129-1-3p; mmu-miR-669a-3p; mmu-miR-466…
linc1470	1.285	52	40.4669	mmu-miR-29b; mmu-miR-93; mmu-miR-335-5p; mmu-miR-466g; mmu-miR-20a; mmu-miR-669o-5p; mmu-miR-29c; mmu-let-7a; mmu-miR-34a; mmu-miR-1983; mmu-miR-106a; mmu-miR-129-2-3p; mmu-miR-17; mmu-miR-202-3p; mmu-miR-129-1-3p; mmu-miR-423-5p; mmu-let-7g; mmu-miR-195; mmu-miR-669l; mmu-miR-125a-5p; mmu-miR-16; mmu-miR-760-5p; mmu-miR-669f-5p; mmu-miR-20b; mmu-miR-125b-5p; mmu-miR-762; mmu-let-7c; mmu-miR-151-…
linc1471	1.294	30	23.1839	mmu-let-7g; mmu-miR-495; mmu-miR-1960; mmu-miR-148b; mmu-miR-93; mmu-miR-148a; mmu-miR-19a; mmu-miR-20b; mmu-miR-20a; mmu-miR-762; mmu-let-7c; mmu-miR-741; mmu-miR-101b; mmu-miR-1196; mmu-miR-152; mmu-miR-669f-3p; mmu-miR-543; mmu-let-7a; mmu-miR-134; mmu-miR-106b; mmu-miR-376b; mmu-miR-106a; mmu-let-7e; mmu-miR-17; mmu-miR-26b; mmu-miR-421; mmu-miR-381; mmu-miR-154; mmu-miR-26a; mmu-miR-19b
linc1473	0.346	4	11.5607	mmu-miR-205; mmu-miR-762; mmu-miR-191; mmu-miR-423-3p
linc1477	1.153	27	23.4172	mmu-miR-302d; mmu-miR-195; mmu-miR-495; mmu-miR-93; mmu-miR-136; mmu-miR-16; mmu-miR-125a-5p; mmu-miR-1198-3p; mmu-miR-20b; mmu-miR-295; mmu-miR-20a; mmu-miR-23b; mmu-miR-125b-5p; mmu-miR-762; mmu-miR-323-3p; mmu-miR-28; mmu-miR-378; mmu-miR-15a; mmu-miR-106b; mmu-miR-106a; mmu-miR-17; mmu-miR-291a-3p; mmu-miR-33; mmu-miR-302a; mmu-miR-15b; mmu-miR-23a; mmu-miR-294
linc1483	1.125	28	24.8889	mmu-miR-669a-3p; mmu-miR-195; mmu-miR-433; mmu-miR-29b; mmu-miR-804; mmu-miR-713; mmu-miR-136; mmu-miR-16; mmu-miR-431; mmu-miR-674; mmu-miR-18b; mmu-miR-741; mmu-miR-151-5p; mmu-miR-29a; mmu-miR-29c; mmu-miR-669o-3p; mmu-miR-15a; mmu-miR-103; mmu-miR-376b; mmu-miR-1952; mmu-miR-1935; mmu-miR-15b
linc1503	1.571	24	15.2769	mmu-miR-195; mmu-miR-145; mmu-miR-713; mmu-miR-429; mmu-miR-136; mmu-miR-200b; mmu-miR-16; mmu-miR-760-5p; mmu-miR-19a; mmu-miR-484; mmu-miR-150; mmu-miR-762; mmu-miR-28; mmu-miR-330; mmu-miR-669f-3p; mmu-miR-15a; mmu-miR-27a; mmu-miR-532-5p; mmu-miR-376b; mmu-miR-200c; mmu-miR-1952; mmu-miR-15b; mmu-miR-19b
linc1505	0.446	9	20.1794	mmu-miR-32; mmu-miR-297c; mmu-miR-367; mmu-miR-378; mmu-miR-1198-5p; mmu-miR-25; mmu-miR-1983; mmu-miR-363-3p; mmu-miR-297a
linc1510	7.66	198	25.8486	mmu-miR-495; mmu-miR-145; mmu-miR-93; mmu-miR-713; mmu-miR-335-5p; mmu-miR-431; mmu-miR-20a; mmu-miR-340-5p; mmu-miR-466b-3p; mmu-miR-30d; mmu-miR-296-5p; mmu-miR-323-3p; mmu-miR-30a; mmu-miR-434-3p; mmu-miR-21; mmu-miR-29c; mmu-miR-155; mmu-miR-669f-3p; mmu-let-7a; mmu-miR-468; mmu-miR-106a; mmu-miR-17; mmu-miR-129-2-3p; mmu-miR-202-3p; mmu-miR-672; mmu-miR-381; mmu-miR-154; mmu-miR-129-1-3p; mm…
linc1517	2.009	61	30.3634	mmu-miR-467e; mmu-miR-93; mmu-miR-804; mmu-miR-335-5p; mmu-miR-96; mmu-miR-431; mmu-miR-150; mmu-miR-674; mmu-miR-20a; mmu-miR-323-3p; mmu-miR-669o-5p; mmu-miR-181a; mmu-miR-290-3p; mmu-miR-205; mmu-miR-467a; mmu-miR-1198-5p; mmu-miR-467h; mmu-miR-106a; mmu-miR-182; mmu-miR-17; mmu-miR-421; mmu-miR-292-3p; mmu-miR-154; mmu-miR-124; mmu-miR-148b; mmu-miR-1960; mmu-miR-297c; mmu-miR-669l; mmu-miR-8…
linc1524	0.35	5	14.2857	mmu-miR-195; mmu-miR-154; mmu-miR-15a; mmu-miR-16; mmu-miR-15b
linc1536	1.322	27	20.4236	mmu-miR-32; mmu-miR-145; mmu-miR-124; mmu-miR-429; mmu-miR-96; mmu-miR-136; mmu-miR-200b; mmu-miR-669d; mmu-miR-363-3p; mmu-miR-340-5p; mmu-miR-23b; mmu-miR-330; mmu-miR-34c; mmu-miR-367; mmu-miR-34a; mmu-miR-378; mmu-miR-27a; mmu-miR-25; mmu-miR-182; mmu-miR-200c; mmu-miR-421; mmu-miR-142-5p; mmu-miR-23a; mmu-miR-292-5p; mmu-miR-410
linc1537	1.231	30	24.3704	mmu-miR-302d; mmu-let-7g; mmu-miR-1960; mmu-miR-804; mmu-miR-96; mmu-miR-130a; mmu-miR-760-5p; mmu-miR-130b; mmu-miR-295; mmu-miR-340-5p; mmu-miR-466b-3p; mmu-let-7c; mmu-miR-151-5p; mmu-miR-466c-3p; mmu-miR-330; mmu-miR-335-3p; mmu-miR-543; mmu-let-7a; mmu-miR-27a; mmu-miR-301a; mmu-miR-376b; mmu-miR-182; mmu-let-7e; mmu-miR-291a-3p; mmu-miR-202-3p; mmu-miR-142-5p; mmu-miR-302a; mmu-miR-294
linc1543	3.279	76	23.1778	mmu-miR-431; mmu-miR-466b-3p; mmu-miR-296-5p; mmu-miR-28; mmu-miR-29c; mmu-miR-290-3p; mmu-miR-191; mmu-miR-292-3p; mmu-miR-154; mmu-miR-466a-3p; mmu-miR-195; mmu-miR-433; mmu-miR-124; mmu-miR-148b; mmu-miR-136; mmu-miR-125a-5p; mmu-miR-760-5p; mmu-miR-148a; mmu-miR-125b-5p; mmu-miR-377; mmu-miR-466c-3p; mmu-miR-1196; mmu-miR-34c; mmu-miR-330; mmu-miR-152; mmu-miR-335-3p; mmu-miR-22; mmu-miR-378;…
linc1547	5.659	117	20.675	mmu-miR-495; mmu-miR-145; mmu-miR-93; mmu-miR-804; mmu-miR-335-5p; mmu-miR-96; mmu-miR-431; mmu-miR-19a; mmu-miR-20a; mmu-miR-323-3p; mmu-miR-28; mmu-miR-434-3p; mmu-miR-541; mmu-miR-106a; mmu-miR-17; mmu-miR-129-2-3p; mmu-miR-672; mmu-miR-129-1-3p; mmu-miR-466a-3p; mmu-miR-148b; mmu-miR-669l; mmu-miR-136; mmu-miR-125a-5p; mmu-miR-760-5p; mmu-miR-1198-3p; mmu-miR-148a; mmu-miR-669f-5p; mmu-miR-20…
linc1552	0.896	14	15.625	mmu-miR-669a-3p; mmu-miR-466c-3p; mmu-miR-29c; mmu-miR-29b; mmu-miR-29a; mmu-miR-205; mmu-miR-124; mmu-miR-669o-3p; mmu-miR-136; mmu-miR-374; mmu-miR-468; mmu-miR-466b-3p; mmu-miR-151-5p; mmu-miR-377
linc1555	0.449	5	11.1359	mmu-miR-467f; mmu-miR-381; mmu-miR-154; mmu-miR-762; mmu-miR-136
linc1557	1.038	21	20.2312	mmu-let-7g; mmu-miR-136; mmu-miR-130a; mmu-miR-466g; mmu-miR-19a; mmu-miR-130b; mmu-miR-466b-3p; mmu-miR-376c; mmu-let-7c; mmu-miR-466c-3p; mmu-miR-291b-3p; mmu-let-7a; mmu-miR-134; mmu-miR-27a; mmu-miR-301a; mmu-let-7e; mmu-miR-1935; mmu-miR-466f; mmu-miR-19b
linc1558	1.317	19	14.4267	mmu-miR-669l; mmu-miR-669f-5p; mmu-miR-484; mmu-miR-340-5p; mmu-miR-23b; mmu-miR-762; mmu-miR-28; mmu-miR-669o-5p; mmu-miR-760-3p; mmu-miR-669a-5p; mmu-miR-27a; mmu-miR-382; mmu-miR-1983; mmu-miR-1224; mmu-miR-33; mmu-miR-421; mmu-miR-1935; mmu-miR-23a
linc1572	0.527	9	17.0778	mmu-miR-124; mmu-miR-27a; mmu-miR-374; mmu-miR-466g; mmu-miR-183; mmu-miR-669d; mmu-miR-329; mmu-miR-1952; mmu-miR-423-5p
linc1582	0.755	14	18.543	mmu-miR-291b-3p; mmu-miR-34c; mmu-miR-467e; mmu-miR-93; mmu-miR-34a; mmu-miR-382; mmu-miR-106b; mmu-miR-467h; mmu-miR-106a; mmu-miR-20b; mmu-miR-17; mmu-miR-674; mmu-miR-20a; mmu-miR-28
linc1596	0.255	8	31.3725	mmu-miR-495; mmu-miR-335-3p; mmu-miR-760-3p; mmu-miR-291b-5p; mmu-miR-22; mmu-miR-129-2-3p; mmu-miR-129-1-3p; mmu-miR-291a-5p
linc1599	0.077	1	12.987	mmu-miR-136
linc1600	0.178	4	22.4719	mmu-miR-22; mmu-miR-125b-5p; mmu-miR-762; mmu-miR-125a-5p
linc1601	0.255	6	23.5294	mmu-miR-23b; mmu-miR-30d; mmu-miR-30b; mmu-miR-292-5p; mmu-miR-23a; mmu-miR-30a
linc1602	0.235	1	4.25532	mmu-miR-1952
linc1603	0.255	4	15.6863	mmu-miR-466a-3p; mmu-miR-155; mmu-miR-762; mmu-miR-376c
linc1607	0.23	4	17.3913	mmu-miR-103; mmu-miR-134; mmu-miR-340-5p; mmu-miR-191
linc1611	0.157	6	38.2166	mmu-miR-195; mmu-miR-103; mmu-miR-33; mmu-miR-15a; mmu-miR-16; mmu-miR-15b
linc1612	0.255	4	15.6863	mmu-miR-495; mmu-miR-421; mmu-miR-22; mmu-miR-1935
linc1613	0.255	8	31.3725	mmu-miR-669a-3p; mmu-miR-297c; mmu-miR-669o-3p; mmu-miR-297a; mmu-miR-466f; mmu-miR-423-3p
linc1614	0.255	2	7.84314	mmu-miR-1945; mmu-miR-423-3p
linc1615	0.215	4	18.6047	mmu-miR-669f-5p; mmu-miR-669l; mmu-miR-669a-5p; mmu-miR-423-5p
linc1616	0.173	1	5.78035	mmu-miR-741
linc1617	0.189	1	5.29101	mmu-miR-292-5p
linc1621	0.255	1	3.92157	mmu-miR-1935
linc1623	0.255	1	3.92157	mmu-miR-421
linc1626	0.255	2	7.84314	mmu-miR-1983; mmu-miR-27a
linc1627	0.255	4	15.6863	mmu-miR-330; mmu-miR-543; mmu-miR-23b; mmu-miR-23a
linc1629	0.255	4	15.6863	mmu-miR-669d; mmu-miR-150; mmu-miR-129-2-3p; mmu-miR-129-1-3p
linc1631	0.255	8	31.3725	mmu-let-7g; mmu-miR-134; mmu-let-7a; mmu-miR-27a; mmu-let-7e; mmu-miR-484; mmu-miR-202-3p; mmu-let-7c
linc1632	0.212	7	33.0189	mmu-miR-669o-5p; mmu-miR-669f-5p; mmu-miR-330; mmu-miR-103; mmu-miR-674; mmu-miR-669l; mmu-miR-669a-5p
linc1634	0.255	1	3.92157	mmu-miR-431
linc1635	0.255	5	19.6078	mmu-miR-1983; mmu-miR-760-3p; mmu-miR-125b-5p; mmu-miR-1935; mmu-miR-125a-5p

## Sheet: protein-coding genes
Protein-coding gene	Length (kb)	Number of MREs	MRE density (sites/kb)	ESC miRNAs
0610007P14RIK	2.219	26	11.717	mmu-miR-195; mmu-miR-466a-3p; mmu-miR-669l; mmu-miR-16; mmu-miR-1198-3p; mmu-miR-669f-5p; mmu-miR-674; mmu-miR-467f; mmu-miR-340-5p; mmu-miR-296-5p; mmu-miR-466b-3p; mmu-miR-151-5p; mmu-miR-28; mmu-miR-466c-3p; mmu-miR-181a; mmu-miR-330; mmu-miR-205; mmu-miR-376a; mmu-miR-669a-5p; mmu-miR-27a; mmu-miR-15a; mmu-miR-183; mmu-miR-103; mmu-miR-129-2-3p; mmu-miR-129-1-3p; mmu-miR-15b
0610009B22RIK	1.414	12	8.48656	mmu-miR-195; mmu-miR-433; mmu-miR-669f-3p; mmu-miR-376a; mmu-miR-15a; mmu-miR-27a; mmu-miR-16; mmu-miR-541; mmu-miR-103; mmu-miR-26b; mmu-miR-26a; mmu-miR-15b
0610009D07RIK	0.645	15	23.2558	mmu-miR-433; mmu-miR-155; mmu-miR-543; mmu-miR-1198-5p; mmu-miR-872; mmu-miR-183; mmu-miR-431; mmu-miR-484; mmu-miR-674; mmu-miR-23b; mmu-miR-672; mmu-miR-1935; mmu-miR-762; mmu-miR-292-5p; mmu-miR-23a
0610009L18RIK	1.025	12	11.7073	mmu-miR-181a; mmu-miR-127; mmu-miR-145; mmu-miR-290-3p; mmu-miR-467a; mmu-miR-125a-5p; mmu-miR-760-5p; mmu-miR-484; mmu-miR-292-3p; mmu-miR-125b-5p; mmu-miR-762; mmu-miR-151-5p
0610009O20RIK	0.972	12	12.3457	mmu-miR-330; mmu-miR-124; mmu-miR-1960; mmu-miR-193b; mmu-miR-484; mmu-miR-376b; mmu-miR-1983; mmu-miR-329; mmu-miR-1952; mmu-miR-762; mmu-miR-292-5p; mmu-miR-423-5p
0610010F05RIK	6.92	32	4.62428	mmu-miR-200a; mmu-miR-148b; mmu-miR-1960; mmu-miR-350; mmu-miR-495; mmu-miR-429; mmu-miR-125a-5p; mmu-miR-200b; mmu-miR-374; mmu-miR-148a; mmu-miR-466g; mmu-miR-674; mmu-miR-125b-5p; mmu-miR-467f; mmu-miR-30d; mmu-miR-376c; mmu-miR-466b-3p; mmu-miR-30a; mmu-miR-141; mmu-miR-466c-3p; mmu-miR-330; mmu-miR-152; mmu-miR-543; mmu-miR-126-3p; mmu-miR-30b; mmu-miR-532-5p; mmu-miR-376b; mmu-miR-200c; mmu…
0610010K14RIK	5.96	17	2.85235	mmu-miR-200a; mmu-miR-713; mmu-miR-96; mmu-miR-374; mmu-miR-760-5p; mmu-miR-484; mmu-miR-674; mmu-miR-23b; mmu-miR-377; mmu-miR-741; mmu-miR-141; mmu-miR-27a; mmu-miR-182; mmu-miR-129-2-3p; mmu-miR-129-1-3p; mmu-miR-23a; mmu-miR-423-5p
0610011F06RIK	1.655	11	6.64653	mmu-miR-302d; mmu-miR-330; mmu-miR-193b; mmu-miR-150; mmu-miR-291a-3p; mmu-miR-295; mmu-miR-762; mmu-miR-302a; mmu-miR-423-5p; mmu-miR-294; mmu-miR-741
0610012H03RIK	1.167	35	29.9914	mmu-miR-495; mmu-miR-713; mmu-miR-804; mmu-miR-431; mmu-miR-30d; mmu-miR-30a; mmu-miR-669o-5p; mmu-miR-543; mmu-miR-34a; mmu-miR-27a; mmu-miR-30b; mmu-miR-1198-5p; mmu-miR-182; mmu-miR-672; mmu-miR-1952; mmu-miR-124; mmu-miR-148b; mmu-miR-1960; mmu-miR-350; mmu-miR-669l; mmu-miR-125a-5p; mmu-miR-1198-3p; mmu-miR-148a; mmu-miR-669f-5p; mmu-miR-125b-5p; mmu-miR-101b; mmu-miR-152; mmu-miR-330; mmu-m…
0610030E20RIK	4.347	78	17.9434	mmu-miR-145; mmu-miR-335-5p; mmu-miR-713; mmu-miR-804; mmu-miR-93; mmu-miR-96; mmu-miR-431; mmu-miR-466g; mmu-miR-19a; mmu-miR-20a; mmu-miR-340-5p; mmu-miR-28; mmu-miR-434-3p; mmu-miR-21; mmu-miR-29c; mmu-miR-669f-3p; mmu-let-7a; mmu-miR-106a; mmu-miR-17; mmu-miR-154; mmu-miR-381; mmu-miR-302a; mmu-miR-302d; mmu-let-7g; mmu-miR-124; mmu-miR-148b; mmu-miR-125a-5p; mmu-miR-760-5p; mmu-miR-1198-3p; …
0610031J06RIK	6.639	43	6.47688	mmu-miR-804; mmu-miR-674; mmu-miR-466b-3p; mmu-miR-296-5p; mmu-miR-291a-5p; mmu-miR-323-3p; mmu-miR-434-3p; mmu-miR-181a; mmu-miR-21; mmu-miR-543; mmu-miR-291b-5p; mmu-miR-132; mmu-miR-34a; mmu-miR-27a; mmu-miR-541; mmu-miR-182; mmu-miR-26b; mmu-miR-672; mmu-miR-423-5p; mmu-miR-195; mmu-miR-466a-3p; mmu-miR-297c; mmu-miR-350; mmu-miR-136; mmu-miR-16; mmu-miR-760-5p; mmu-miR-484; mmu-miR-741; mmu-…
0610037L13RIK	26.48	57	2.15257	mmu-miR-467e; mmu-miR-431; mmu-miR-466g; mmu-miR-467c; mmu-miR-674; mmu-miR-30d; mmu-miR-30a; mmu-miR-21; mmu-miR-290-3p; mmu-miR-543; mmu-miR-669o-3p; mmu-miR-467a; mmu-miR-27a; mmu-miR-30b; mmu-miR-191; mmu-miR-467h; mmu-miR-541; mmu-miR-103; mmu-miR-468; mmu-miR-292-3p; mmu-miR-381; mmu-miR-302a; mmu-miR-669a-3p; mmu-miR-466a-3p; mmu-miR-195; mmu-miR-302d; mmu-miR-142-3p; mmu-miR-350; mmu-miR-…
0610040J01RIK	1.665	44	26.4264	mmu-miR-467e; mmu-miR-335-5p; mmu-miR-30d; mmu-miR-291a-5p; mmu-miR-30a; mmu-miR-28; mmu-miR-181a; mmu-miR-205; mmu-miR-155; mmu-miR-291b-5p; mmu-let-7a; mmu-miR-27a; mmu-miR-30b; mmu-miR-467h; mmu-miR-103; mmu-miR-129-2-3p; mmu-miR-26b; mmu-miR-202-3p; mmu-miR-1952; mmu-miR-421; mmu-miR-129-1-3p; mmu-let-7g; mmu-miR-195; mmu-miR-669l; mmu-miR-136; mmu-miR-125a-5p; mmu-miR-16; mmu-miR-669f-5p; mm…
1110001A16RIK	2.292	21	9.1623	mmu-miR-195; mmu-miR-145; mmu-miR-335-5p; mmu-miR-125a-5p; mmu-miR-16; mmu-miR-374; mmu-miR-466g; mmu-miR-150; mmu-miR-125b-5p; mmu-miR-23b; mmu-miR-291b-3p; mmu-miR-181a; mmu-miR-335-3p; mmu-miR-15a; mmu-miR-193b; mmu-miR-468; mmu-miR-1983; mmu-miR-26b; mmu-miR-26a; mmu-miR-23a; mmu-miR-15b
1110001J03RIK	0.291	4	13.7457	mmu-miR-129-2-3p; mmu-miR-1224; mmu-miR-129-1-3p; mmu-miR-1935
1110002L01RIK	9.626	47	4.88261	mmu-miR-145; mmu-miR-29b; mmu-miR-495; mmu-miR-804; mmu-miR-466g; mmu-miR-340-5p; mmu-miR-466b-3p; mmu-miR-296-5p; mmu-miR-28; mmu-miR-323-3p; mmu-miR-434-3p; mmu-miR-29c; mmu-miR-669f-3p; mmu-miR-367; mmu-let-7a; mmu-miR-27a; mmu-miR-1198-5p; mmu-miR-1983; mmu-miR-129-2-3p; mmu-miR-202-3p; mmu-miR-381; mmu-miR-129-1-3p; mmu-miR-466a-3p; mmu-let-7g; mmu-miR-32; mmu-miR-669l; mmu-miR-136; mmu-miR-…
1110004E09RIK	1.614	11	6.81537	mmu-miR-145; mmu-miR-495; mmu-miR-543; mmu-miR-760-3p; mmu-miR-136; mmu-miR-669d; mmu-miR-484; mmu-miR-103; mmu-miR-1983; mmu-miR-672; mmu-miR-762
1110007C09RIK	0.297	8	26.936	mmu-miR-195; mmu-miR-340-5p; mmu-miR-376a; mmu-miR-15a; mmu-miR-1198-5p; mmu-miR-15b; mmu-miR-16; mmu-miR-466g
1110008F13RIK	0.521	10	19.1939	mmu-miR-34c; mmu-miR-127; mmu-miR-350; mmu-miR-34a; mmu-miR-429; mmu-miR-200b; mmu-miR-200c; mmu-miR-26b; mmu-miR-421; mmu-miR-26a
1110008L16RIK	0.235	4	17.0213	mmu-miR-330; mmu-miR-1935; mmu-miR-27a; mmu-miR-96
1110008P14RIK	1.113	11	9.8832	mmu-miR-32; mmu-miR-34c; mmu-miR-367; mmu-miR-34a; mmu-miR-125a-5p; mmu-miR-25; mmu-miR-363-3p; mmu-miR-103; mmu-miR-18b; mmu-miR-125b-5p; mmu-miR-762
1110018G07RIK	6.551	70	10.6854	mmu-miR-145; mmu-miR-495; mmu-miR-335-5p; mmu-miR-93; mmu-miR-96; mmu-miR-19a; mmu-miR-20a; mmu-miR-30d; mmu-miR-30a; mmu-let-7a; mmu-miR-468; mmu-miR-106a; mmu-miR-17; mmu-miR-202-3p; mmu-miR-672; mmu-miR-302a; mmu-miR-302d; mmu-let-7g; mmu-miR-195; mmu-miR-124; mmu-miR-148b; mmu-miR-125a-5p; mmu-miR-148a; mmu-miR-20b; mmu-miR-295; mmu-miR-23b; mmu-miR-125b-5p; mmu-miR-377; mmu-miR-152; mmu-miR-…
1110032F04RIK	2.578	40	15.5159	mmu-miR-200a; mmu-miR-29b; mmu-miR-466g; mmu-miR-467f; mmu-miR-340-5p; mmu-miR-466b-3p; mmu-miR-296-5p; mmu-miR-291a-5p; mmu-miR-323-3p; mmu-miR-29c; mmu-miR-205; mmu-miR-291b-5p; mmu-miR-132; mmu-miR-1893; mmu-miR-27a; mmu-miR-103; mmu-miR-466a-3p; mmu-miR-195; mmu-miR-125a-5p; mmu-miR-16; mmu-miR-374; mmu-miR-125b-5p; mmu-miR-23b; mmu-miR-762; mmu-miR-376c; mmu-miR-466c-3p; mmu-miR-141; mmu-miR…
1110034G24RIK	1.686	29	17.2005	mmu-let-7g; mmu-miR-195; mmu-miR-32; mmu-miR-124; mmu-miR-713; mmu-miR-16; mmu-miR-1198-3p; mmu-miR-363-3p; mmu-miR-23b; mmu-let-7c; mmu-miR-34c; mmu-miR-330; mmu-miR-181a; mmu-miR-21; mmu-miR-127; mmu-let-7a; mmu-miR-760-3p; mmu-miR-367; mmu-miR-22; mmu-miR-34a; mmu-miR-15a; mmu-miR-193b; mmu-miR-25; mmu-miR-541; mmu-let-7e; mmu-miR-376b; mmu-miR-23a; mmu-miR-15b; mmu-miR-466f
1110037F02RIK	2.28	21	9.21053	mmu-let-7g; mmu-miR-200a; mmu-miR-145; mmu-miR-495; mmu-miR-374; mmu-miR-369-3p; mmu-miR-340-5p; mmu-let-7c; mmu-miR-291a-5p; mmu-miR-101b; mmu-miR-141; mmu-miR-205; mmu-miR-669f-3p; mmu-let-7a; mmu-miR-291b-5p; mmu-miR-541; mmu-let-7e; mmu-miR-202-3p; mmu-miR-381; mmu-miR-142-5p; mmu-miR-410
1110038F14RIK	0.481	13	27.027	mmu-miR-195; mmu-miR-434-3p; mmu-miR-1945; mmu-miR-205; mmu-miR-669f-3p; mmu-miR-760-3p; mmu-miR-15a; mmu-miR-16; mmu-miR-674; mmu-miR-381; mmu-miR-15b; mmu-miR-410; mmu-miR-741
1110051M20RIK	5.008	54	10.7827	mmu-miR-29b; mmu-miR-335-5p; mmu-miR-713; mmu-miR-804; mmu-miR-96; mmu-miR-431; mmu-miR-150; mmu-miR-674; mmu-miR-340-5p; mmu-miR-669o-5p; mmu-miR-29c; mmu-miR-205; mmu-let-7a; mmu-miR-34a; mmu-miR-27a; mmu-miR-182; mmu-miR-1983; mmu-miR-103; mmu-miR-129-2-3p; mmu-miR-26b; mmu-miR-1952; mmu-miR-129-1-3p; mmu-miR-423-5p; mmu-let-7g; mmu-miR-124; mmu-miR-297c; mmu-miR-669l; mmu-miR-136; mmu-miR-872…
1110058L19RIK	0.683	18	26.3543	mmu-miR-195; mmu-miR-335-5p; mmu-miR-136; mmu-miR-16; mmu-miR-484; mmu-miR-18b; mmu-miR-30d; mmu-miR-30a; mmu-miR-669o-5p; mmu-miR-760-3p; mmu-miR-15a; mmu-miR-191; mmu-miR-30b; mmu-miR-103; mmu-miR-329; mmu-miR-672; mmu-miR-15b; mmu-miR-423-5p
1110059E24RIK	5.139	41	7.97821	mmu-miR-200a; mmu-miR-467e; mmu-miR-93; mmu-miR-96; mmu-miR-466g; mmu-miR-20a; mmu-miR-467f; mmu-miR-340-5p; mmu-miR-30d; mmu-miR-291a-5p; mmu-miR-28; mmu-miR-30a; mmu-miR-205; mmu-miR-669f-3p; mmu-miR-291b-5p; mmu-miR-27a; mmu-miR-30b; mmu-miR-467h; mmu-miR-1983; mmu-miR-106a; mmu-miR-182; mmu-miR-468; mmu-miR-17; mmu-miR-26b; mmu-miR-1952; mmu-miR-381; mmu-miR-466a-3p; mmu-miR-142-3p; mmu-miR-1…
1110059G10RIK	6.04	64	10.596	mmu-miR-200a; mmu-miR-467e; mmu-miR-713; mmu-miR-804; mmu-miR-93; mmu-miR-431; mmu-miR-674; mmu-miR-20a; mmu-miR-467f; mmu-miR-466b-3p; mmu-miR-30d; mmu-miR-291a-5p; mmu-miR-28; mmu-miR-30a; mmu-miR-434-3p; mmu-miR-205; mmu-miR-543; mmu-miR-291b-5p; mmu-miR-132; mmu-miR-669f-3p; mmu-miR-367; mmu-let-7a; mmu-miR-34a; mmu-miR-30b; mmu-miR-1198-5p; mmu-miR-467h; mmu-miR-106a; mmu-miR-17; mmu-miR-26b…
1190002N15RIK	2.783	41	14.7323	mmu-miR-495; mmu-miR-96; mmu-miR-200b; mmu-miR-674; mmu-miR-369-3p; mmu-miR-340-5p; mmu-miR-291a-5p; mmu-miR-21; mmu-miR-290-3p; mmu-miR-669f-3p; mmu-miR-291b-5p; mmu-miR-132; mmu-miR-467a; mmu-miR-182; mmu-miR-292-3p; mmu-miR-302a; mmu-miR-466a-3p; mmu-miR-302d; mmu-miR-124; mmu-miR-148b; mmu-miR-1960; mmu-miR-350; mmu-miR-429; mmu-miR-374; mmu-miR-148a; mmu-miR-484; mmu-miR-295; mmu-miR-23b; mm…
1190003J15RIK	0.572	4	6.99301	mmu-miR-195; mmu-miR-15a; mmu-miR-15b; mmu-miR-16
1190007I07RIK	0.734	6	8.17439	mmu-miR-466a-3p; mmu-miR-376b; mmu-miR-1960; mmu-miR-672; mmu-miR-27a; mmu-miR-96
1200011I18RIK	4.515	79	17.4972	mmu-miR-145; mmu-miR-495; mmu-miR-335-5p; mmu-miR-804; mmu-miR-93; mmu-miR-466g; mmu-miR-20a; mmu-miR-340-5p; mmu-miR-296-5p; mmu-miR-30d; mmu-miR-466b-3p; mmu-miR-30a; mmu-miR-434-3p; mmu-miR-21; mmu-miR-29c; mmu-miR-669f-3p; mmu-miR-541; mmu-miR-106a; mmu-miR-129-2-3p; mmu-miR-17; mmu-miR-381; mmu-miR-129-1-3p; mmu-miR-302a; mmu-miR-466a-3p; mmu-miR-302d; mmu-miR-195; mmu-miR-433; mmu-miR-124; …
1200014J11RIK	1.277	18	14.0955	mmu-miR-29b; mmu-miR-335-5p; mmu-miR-713; mmu-miR-466g; mmu-miR-760-5p; mmu-miR-369-3p; mmu-miR-741; mmu-miR-205; mmu-miR-29a; mmu-miR-29c; mmu-miR-27a; mmu-miR-103; mmu-miR-468; mmu-miR-26b; mmu-miR-1224; mmu-miR-421; mmu-miR-26a; mmu-miR-410
1300017J02RIK	1.972	18	9.12779	mmu-miR-142-3p; mmu-miR-200a; mmu-miR-433; mmu-miR-96; mmu-miR-484; mmu-miR-674; mmu-miR-296-5p; mmu-miR-141; mmu-miR-34c; mmu-miR-132; mmu-miR-543; mmu-miR-34a; mmu-miR-183; mmu-miR-193b; mmu-miR-182; mmu-miR-421; mmu-miR-1935; mmu-miR-423-5p
1500011B03RIK	2.272	21	9.24296	mmu-miR-195; mmu-miR-302d; mmu-miR-669a-3p; mmu-miR-130a; mmu-miR-16; mmu-miR-467c; mmu-miR-130b; mmu-miR-295; mmu-miR-23b; mmu-miR-291b-3p; mmu-miR-290-3p; mmu-miR-669o-3p; mmu-miR-467a; mmu-miR-15a; mmu-miR-301a; mmu-miR-291a-3p; mmu-miR-292-3p; mmu-miR-302a; mmu-miR-15b; mmu-miR-23a; mmu-miR-294
1500012F01RIK	0.176	5	28.4091	mmu-miR-130b; mmu-miR-33; mmu-miR-130a; mmu-miR-762; mmu-miR-301a
1500015O10RIK	0.334	2	5.98802	mmu-miR-467e; mmu-miR-467h
1600002K03RIK	0.33	7	21.2121	mmu-miR-195; mmu-miR-484; mmu-miR-760-3p; mmu-miR-136; mmu-miR-15a; mmu-miR-15b; mmu-miR-16
1600012H06RIK	7.11	54	7.59494	mmu-miR-200a; mmu-miR-29b; mmu-miR-495; mmu-miR-93; mmu-miR-431; mmu-miR-19a; mmu-miR-20a; mmu-miR-340-5p; mmu-miR-467f; mmu-miR-466b-3p; mmu-miR-323-3p; mmu-miR-181a; mmu-miR-29c; mmu-let-7a; mmu-miR-132; mmu-miR-27a; mmu-miR-1983; mmu-miR-468; mmu-miR-106a; mmu-miR-17; mmu-miR-202-3p; mmu-miR-26b; mmu-miR-154; mmu-miR-421; mmu-miR-302a; mmu-miR-19b; mmu-miR-302d; mmu-let-7g; mmu-miR-760-5p; mmu…
1600014C10RIK	5.72	42	7.34266	mmu-miR-29b; mmu-miR-495; mmu-miR-335-5p; mmu-miR-713; mmu-miR-431; mmu-miR-296-5p; mmu-miR-291a-5p; mmu-miR-28; mmu-miR-29c; mmu-miR-290-3p; mmu-miR-291b-5p; mmu-let-7a; mmu-miR-132; mmu-miR-34a; mmu-miR-467a; mmu-miR-27a; mmu-miR-202-3p; mmu-miR-292-3p; mmu-miR-672; mmu-let-7g; mmu-miR-195; mmu-miR-466a-3p; mmu-miR-136; mmu-miR-16; mmu-miR-760-5p; mmu-miR-484; mmu-miR-762; mmu-miR-376c; mmu-let…
1600014C23RIK	0.259	4	15.444	mmu-miR-466c-3p; mmu-miR-1224; mmu-miR-674; mmu-miR-466b-3p
1600029D21RIK	1.363	14	10.2715	mmu-miR-141; mmu-miR-291b-3p; mmu-miR-200a; mmu-miR-205; mmu-miR-335-3p; mmu-miR-27a; mmu-miR-96; mmu-miR-872; mmu-miR-193b; mmu-miR-760-5p; mmu-miR-182; mmu-miR-1224; mmu-miR-421; mmu-miR-672
1700001C02RIK	0.555	11	19.8198	mmu-miR-205; mmu-miR-760-3p; mmu-miR-429; mmu-miR-27a; mmu-miR-378; mmu-miR-125a-5p; mmu-miR-200b; mmu-miR-431; mmu-miR-484; mmu-miR-200c; mmu-miR-125b-5p
1700001G17RIK	0.87	11	12.6437	mmu-miR-1893; mmu-miR-713; mmu-miR-136; mmu-miR-19a; mmu-miR-669d; mmu-miR-484; mmu-miR-672; mmu-miR-33; mmu-miR-292-5p; mmu-miR-19b; mmu-miR-151-5p
1700001L19RIK	1.402	43	30.6705	mmu-miR-200a; mmu-miR-29b; mmu-miR-495; mmu-miR-335-5p; mmu-miR-93; mmu-miR-19a; mmu-miR-20a; mmu-miR-296-5p; mmu-miR-181a; mmu-miR-29c; mmu-miR-155; mmu-miR-543; mmu-miR-34a; mmu-miR-106a; mmu-miR-1983; mmu-miR-17; mmu-miR-421; mmu-miR-302a; mmu-miR-19b; mmu-miR-302d; mmu-miR-148b; mmu-miR-1960; mmu-miR-297c; mmu-miR-136; mmu-miR-125a-5p; mmu-miR-148a; mmu-miR-484; mmu-miR-20b; mmu-miR-295; mmu-…
1700001O22RIK	18.777	29	1.54444	mmu-miR-148b; mmu-miR-29b; mmu-miR-669l; mmu-miR-130a; mmu-miR-125a-5p; mmu-miR-148a; mmu-miR-431; mmu-miR-669f-5p; mmu-miR-130b; mmu-miR-150; mmu-miR-125b-5p; mmu-miR-487b; mmu-miR-34c; mmu-miR-330; mmu-miR-152; mmu-miR-29a; mmu-miR-29c; mmu-miR-760-3p; mmu-miR-126-3p; mmu-miR-34a; mmu-miR-669a-5p; mmu-miR-382; mmu-miR-301a; mmu-miR-1983; mmu-miR-103; mmu-miR-129-2-3p; mmu-miR-154; mmu-miR-672; …
1700003E16RIK	2.794	34	12.1689	mmu-miR-130a; mmu-miR-200b; mmu-miR-431; mmu-miR-130b; mmu-miR-150; mmu-miR-296-5p; mmu-miR-434-3p; mmu-miR-1893; mmu-miR-541; mmu-miR-103; mmu-miR-1983; mmu-miR-129-2-3p; mmu-miR-26b; mmu-miR-672; mmu-miR-1952; mmu-miR-129-1-3p; mmu-miR-124; mmu-miR-669l; mmu-miR-429; mmu-miR-760-5p; mmu-miR-1198-3p; mmu-miR-669d; mmu-miR-484; mmu-miR-669f-5p; mmu-miR-151-5p; mmu-miR-760-3p; mmu-miR-669a-5p; mmu…
1700003M02RIK	2.953	32	10.8364	mmu-miR-145; mmu-miR-495; mmu-miR-335-5p; mmu-miR-130a; mmu-miR-130b; mmu-miR-369-3p; mmu-miR-467f; mmu-miR-30d; mmu-miR-291a-5p; mmu-miR-30a; mmu-miR-155; mmu-miR-132; mmu-miR-291b-5p; mmu-miR-669o-3p; mmu-miR-1198-5p; mmu-miR-30b; mmu-miR-1983; mmu-miR-103; mmu-miR-423-5p; mmu-miR-669a-3p; mmu-miR-1960; mmu-miR-374; mmu-miR-720; mmu-miR-762; mmu-miR-377; mmu-miR-330; mmu-miR-134; mmu-miR-293; m…
1700007K13RIK	0.947	8	8.44773	mmu-miR-34c; mmu-miR-543; mmu-miR-760-3p; mmu-miR-34a; mmu-miR-125a-5p; mmu-miR-468; mmu-miR-1224; mmu-miR-125b-5p
1700008O03RIK	1.742	14	8.03674	mmu-miR-181a; mmu-miR-136; mmu-miR-27a; mmu-miR-378; mmu-miR-374; mmu-miR-19a; mmu-miR-484; mmu-miR-103; mmu-miR-1952; mmu-miR-1935; mmu-miR-762; mmu-miR-19b; mmu-miR-28; mmu-miR-423-5p
1700009P17RIK	1.709	6	3.51083	mmu-miR-669d; mmu-miR-142-3p; mmu-miR-669o-5p; mmu-miR-672; mmu-miR-378; mmu-miR-431
1700010I14RIK	0.846	18	21.2766	mmu-miR-195; mmu-miR-145; mmu-miR-93; mmu-miR-136; mmu-miR-16; mmu-miR-466g; mmu-miR-20b; mmu-miR-20a; mmu-miR-340-5p; mmu-miR-467f; mmu-miR-15a; mmu-miR-106b; mmu-miR-106a; mmu-miR-103; mmu-miR-1983; mmu-miR-17; mmu-miR-142-5p; mmu-miR-15b
1700013F07RIK	0.147	2	13.6054	mmu-miR-495; mmu-miR-136
1700016H13RIK	6.877	32	4.65319	mmu-miR-32; mmu-miR-200a; mmu-miR-335-5p; mmu-miR-804; mmu-miR-93; mmu-miR-136; mmu-miR-363-3p; mmu-miR-20b; mmu-miR-150; mmu-miR-20a; mmu-miR-762; mmu-miR-141; mmu-miR-335-3p; mmu-miR-290-3p; mmu-miR-205; mmu-miR-760-3p; mmu-miR-367; mmu-miR-467a; mmu-miR-27a; mmu-miR-106b; mmu-miR-1198-5p; mmu-miR-193b; mmu-miR-25; mmu-miR-376b; mmu-miR-106a; mmu-miR-17; mmu-miR-329; mmu-miR-26b; mmu-miR-33; mm…
1700016K19RIK	0.566	11	19.4346	mmu-let-7g; mmu-let-7e; mmu-miR-330; mmu-miR-127; mmu-miR-155; mmu-let-7a; mmu-miR-760-3p; mmu-miR-1952; mmu-miR-762; mmu-let-7c; mmu-miR-28
1700017B05RIK	2.008	39	19.4223	mmu-miR-467e; mmu-miR-335-5p; mmu-miR-804; mmu-miR-150; mmu-miR-434-3p; mmu-miR-669o-5p; mmu-miR-181a; mmu-let-7a; mmu-miR-132; mmu-miR-34a; mmu-miR-467h; mmu-miR-541; mmu-miR-468; mmu-miR-129-2-3p; mmu-miR-202-3p; mmu-miR-26b; mmu-miR-129-1-3p; mmu-miR-302a; mmu-let-7g; mmu-miR-302d; mmu-miR-124; mmu-miR-136; mmu-miR-760-5p; mmu-miR-484; mmu-miR-295; mmu-miR-762; mmu-let-7c; mmu-miR-377; mmu-miR…
1700018A14RIK	0.711	19	26.7229	mmu-miR-291b-3p; mmu-miR-302d; mmu-miR-152; mmu-miR-290-3p; mmu-miR-148b; mmu-miR-467e; mmu-miR-467a; mmu-miR-130a; mmu-miR-301a; mmu-miR-467h; mmu-miR-148a; mmu-miR-760-5p; mmu-miR-467c; mmu-miR-130b; mmu-miR-291a-3p; mmu-miR-295; mmu-miR-292-3p; mmu-miR-302a; mmu-miR-294
1700019A02RIK	0.212	4	18.8679	mmu-miR-466c-3p; mmu-miR-340-5p; mmu-miR-376c; mmu-miR-466b-3p
1700019G17RIK	5.126	50	9.75419	mmu-miR-200a; mmu-miR-145; mmu-miR-130a; mmu-miR-96; mmu-miR-431; mmu-miR-466g; mmu-miR-19a; mmu-miR-130b; mmu-miR-150; mmu-miR-291a-5p; mmu-miR-205; mmu-miR-669f-3p; mmu-miR-291b-5p; mmu-let-7a; mmu-miR-669o-3p; mmu-miR-1198-5p; mmu-miR-541; mmu-miR-129-2-3p; mmu-miR-202-3p; mmu-miR-26b; mmu-miR-1952; mmu-miR-129-1-3p; mmu-miR-19b; mmu-miR-669a-3p; mmu-miR-466a-3p; mmu-let-7g; mmu-miR-433; mmu-m…
1700021F05RIK	1.401	11	7.85153	mmu-miR-330; mmu-miR-335-3p; mmu-miR-543; mmu-miR-126-3p; mmu-miR-376a; mmu-miR-1198-5p; mmu-miR-374; mmu-miR-376b; mmu-miR-484; mmu-miR-150; mmu-miR-381
1700021K19RIK	17.919	66	3.68324	mmu-miR-145; mmu-miR-335-5p; mmu-miR-713; mmu-miR-804; mmu-miR-93; mmu-miR-431; mmu-miR-467c; mmu-miR-20a; mmu-miR-296-5p; mmu-miR-28; mmu-miR-29c; mmu-miR-290-3p; mmu-miR-541; mmu-miR-106a; mmu-miR-129-2-3p; mmu-miR-17; mmu-miR-292-3p; mmu-miR-129-1-3p; mmu-miR-302a; mmu-miR-302d; mmu-miR-195; mmu-miR-124; mmu-miR-136; mmu-miR-760-5p; mmu-miR-20b; mmu-miR-295; mmu-miR-330; mmu-miR-335-3p; mmu-mi…
1700023E05RIK	1.323	9	6.80272	mmu-miR-669d; mmu-miR-21; mmu-miR-29a; mmu-miR-29b; mmu-miR-29c; mmu-miR-381; mmu-miR-421; mmu-miR-762; mmu-miR-377
1700025G04RIK	26.865	96	3.57342	mmu-miR-495; mmu-miR-713; mmu-miR-804; mmu-miR-93; mmu-miR-431; mmu-miR-466g; mmu-miR-20a; mmu-miR-340-5p; mmu-miR-434-3p; mmu-miR-29c; mmu-miR-669f-3p; mmu-miR-191; mmu-miR-541; mmu-miR-106a; mmu-miR-17; mmu-miR-129-2-3p; mmu-miR-202-3p; mmu-miR-154; mmu-miR-672; mmu-miR-129-1-3p; mmu-miR-669a-3p; mmu-miR-195; mmu-miR-124; mmu-miR-148b; mmu-miR-669l; mmu-miR-136; mmu-miR-125a-5p; mmu-miR-760-5p;…
1700026L06RIK	1.338	30	22.4215	mmu-miR-302d; mmu-miR-32; mmu-miR-142-3p; mmu-miR-1960; mmu-miR-93; mmu-miR-125a-5p; mmu-miR-760-5p; mmu-miR-20b; mmu-miR-363-3p; mmu-miR-20a; mmu-miR-295; mmu-miR-125b-5p; mmu-miR-101b; mmu-miR-34c; mmu-miR-21; mmu-miR-760-3p; mmu-miR-367; mmu-miR-34a; mmu-miR-106b; mmu-miR-193b; mmu-miR-25; mmu-miR-541; mmu-miR-1983; mmu-miR-103; mmu-miR-106a; mmu-miR-291a-3p; mmu-miR-17; mmu-miR-142-5p; mmu-mi…
1700029J07RIK	0.414	5	12.0773	mmu-miR-669f-5p; mmu-miR-155; mmu-miR-1224; mmu-miR-669l; mmu-miR-669a-5p
1700029P11RIK	1.024	15	14.6484	mmu-miR-141; mmu-miR-466c-3p; mmu-miR-181a; mmu-miR-200a; mmu-miR-330; mmu-miR-96; mmu-miR-193b; mmu-miR-182; mmu-miR-150; mmu-miR-26b; mmu-miR-26a; mmu-miR-1935; mmu-miR-296-5p; mmu-miR-466b-3p; mmu-miR-28
1700030C10RIK	2.178	18	8.26446	mmu-miR-335-5p; mmu-miR-804; mmu-miR-125a-5p; mmu-miR-1198-3p; mmu-miR-466g; mmu-miR-484; mmu-miR-150; mmu-miR-674; mmu-miR-125b-5p; mmu-miR-377; mmu-miR-21; mmu-miR-330; mmu-miR-335-3p; mmu-miR-22; mmu-miR-1952; mmu-miR-1935; mmu-miR-466f; mmu-miR-423-5p
1700030J22RIK	2.662	41	15.402	mmu-miR-145; mmu-miR-495; mmu-miR-335-5p; mmu-miR-96; mmu-miR-431; mmu-miR-150; mmu-miR-467f; mmu-miR-340-5p; mmu-miR-669o-5p; mmu-miR-34a; mmu-miR-27a; mmu-miR-1983; mmu-miR-129-2-3p; mmu-miR-381; mmu-miR-129-1-3p; mmu-miR-423-5p; mmu-miR-195; mmu-miR-148b; mmu-miR-1960; mmu-miR-136; mmu-miR-16; mmu-miR-760-5p; mmu-miR-148a; mmu-miR-484; mmu-miR-762; mmu-miR-741; mmu-miR-1196; mmu-miR-152; mmu-m…
1700037H04RIK	5.415	18	3.3241	mmu-miR-195; mmu-miR-16; mmu-miR-150; mmu-miR-762; mmu-miR-291a-5p; mmu-miR-377; mmu-miR-330; mmu-miR-335-3p; mmu-miR-760-3p; mmu-miR-291b-5p; mmu-miR-293; mmu-miR-15a; mmu-miR-103; mmu-miR-129-2-3p; mmu-miR-1935; mmu-miR-129-1-3p; mmu-miR-15b; mmu-miR-423-5p
1700049G17RIK	10.275	104	10.1217	mmu-miR-145; mmu-miR-495; mmu-miR-713; mmu-miR-804; mmu-miR-93; mmu-miR-431; mmu-miR-466g; mmu-miR-467c; mmu-miR-20a; mmu-miR-340-5p; mmu-miR-296-5p; mmu-miR-30d; mmu-miR-466b-3p; mmu-miR-28; mmu-miR-30a; mmu-miR-155; mmu-miR-290-3p; mmu-let-7a; mmu-miR-367; mmu-miR-669f-3p; mmu-miR-106a; mmu-miR-468; mmu-miR-129-2-3p; mmu-miR-17; mmu-miR-202-3p; mmu-miR-292-3p; mmu-miR-381; mmu-miR-129-1-3p; mmu…
1700052N19RIK	5.176	40	7.72798	mmu-miR-200a; mmu-miR-145; mmu-miR-335-5p; mmu-miR-713; mmu-miR-130a; mmu-miR-431; mmu-miR-130b; mmu-miR-674; mmu-miR-30d; mmu-miR-291a-5p; mmu-miR-28; mmu-miR-30a; mmu-miR-21; mmu-miR-132; mmu-miR-543; mmu-miR-291b-5p; mmu-let-7a; mmu-miR-34a; mmu-miR-191; mmu-miR-1198-5p; mmu-miR-30b; mmu-miR-103; mmu-miR-202-3p; mmu-miR-1952; mmu-miR-421; mmu-let-7g; mmu-miR-125a-5p; mmu-miR-1198-3p; mmu-miR-1…
1700055D18RIK	1.57	31	19.7452	mmu-let-7g; mmu-miR-142-3p; mmu-miR-433; mmu-miR-148b; mmu-miR-1960; mmu-miR-467e; mmu-miR-148a; mmu-miR-19a; mmu-miR-18b; mmu-miR-30d; mmu-miR-376c; mmu-let-7c; mmu-miR-291a-5p; mmu-miR-28; mmu-miR-30a; mmu-miR-21; mmu-miR-152; mmu-miR-205; mmu-miR-335-3p; mmu-let-7a; mmu-miR-291b-5p; mmu-miR-543; mmu-miR-760-3p; mmu-miR-30b; mmu-miR-423-3p; mmu-miR-467h; mmu-miR-541; mmu-let-7e; mmu-miR-292-5p;…
1700056E22RIK	0.967	15	15.5119	mmu-miR-1893; mmu-miR-293; mmu-miR-335-5p; mmu-miR-27a; mmu-miR-125a-5p; mmu-miR-674; mmu-miR-202-3p; mmu-miR-23b; mmu-miR-1952; mmu-miR-125b-5p; mmu-miR-421; mmu-miR-296-5p; mmu-miR-762; mmu-miR-23a; mmu-miR-423-5p
1700066M21RIK	2.681	64	23.8717	mmu-miR-495; mmu-miR-93; mmu-miR-19a; mmu-miR-20a; mmu-miR-340-5p; mmu-miR-323-3p; mmu-miR-290-3p; mmu-miR-669f-3p; mmu-miR-106a; mmu-miR-17; mmu-miR-292-3p; mmu-miR-381; mmu-miR-302a; mmu-miR-195; mmu-miR-466a-3p; mmu-miR-302d; mmu-miR-433; mmu-miR-124; mmu-miR-125a-5p; mmu-miR-20b; mmu-miR-295; mmu-miR-23b; mmu-miR-125b-5p; mmu-miR-15a; mmu-miR-1224; mmu-miR-26a; mmu-miR-410; mmu-miR-200a; mmu-…
1700101E01RIK	0.616	15	24.3506	mmu-miR-152; mmu-miR-433; mmu-miR-148b; mmu-miR-1960; mmu-miR-22; mmu-miR-335-5p; mmu-miR-429; mmu-miR-136; mmu-miR-200b; mmu-miR-148a; mmu-miR-129-2-3p; mmu-miR-200c; mmu-miR-672; mmu-miR-129-1-3p; mmu-miR-323-3p
1700102P08RIK	0.571	11	19.2644	mmu-miR-34c; mmu-miR-297c; mmu-miR-132; mmu-miR-760-3p; mmu-miR-34a; mmu-miR-382; mmu-miR-541; mmu-miR-1224; mmu-miR-381; mmu-miR-421; mmu-miR-297a
1700106J16RIK	1.219	22	18.0476	mmu-let-7g; mmu-miR-145; mmu-miR-148b; mmu-miR-1960; mmu-miR-148a; mmu-miR-760-5p; mmu-let-7c; mmu-miR-434-3p; mmu-miR-34c; mmu-miR-152; mmu-miR-205; mmu-miR-760-3p; mmu-let-7a; mmu-miR-1893; mmu-miR-34a; mmu-miR-191; mmu-miR-1983; mmu-miR-468; mmu-let-7e; mmu-miR-1224; mmu-miR-421; mmu-miR-1935
1700123O20RIK	0.939	19	20.2343	mmu-miR-195; mmu-miR-142-3p; mmu-miR-124; mmu-miR-145; mmu-miR-1960; mmu-miR-467e; mmu-miR-495; mmu-miR-713; mmu-miR-16; mmu-miR-674; mmu-miR-720; mmu-miR-296-5p; mmu-miR-34c; mmu-miR-22; mmu-miR-34a; mmu-miR-15a; mmu-miR-467h; mmu-miR-421; mmu-miR-15b
1810009A15RIK	0.33	8	24.2424	mmu-miR-541; mmu-miR-152; mmu-miR-148b; mmu-miR-1960; mmu-miR-669f-3p; mmu-miR-467f; mmu-miR-762; mmu-miR-148a
1810011O10RIK	1.509	24	15.9046	mmu-miR-124; mmu-miR-145; mmu-miR-148b; mmu-miR-1960; mmu-miR-297c; mmu-miR-713; mmu-miR-804; mmu-miR-96; mmu-miR-148a; mmu-miR-19a; mmu-miR-484; mmu-miR-296-5p; mmu-miR-762; mmu-miR-152; mmu-miR-181a; mmu-miR-155; mmu-miR-543; mmu-miR-760-3p; mmu-miR-27a; mmu-miR-382; mmu-miR-182; mmu-miR-297a; mmu-miR-292-5p; mmu-miR-19b
1810013L24RIK	3.123	67	21.4537	mmu-miR-495; mmu-miR-335-5p; mmu-miR-713; mmu-miR-93; mmu-miR-431; mmu-miR-20a; mmu-miR-29c; mmu-miR-367; mmu-let-7a; mmu-miR-106a; mmu-miR-17; mmu-miR-202-3p; mmu-miR-302a; mmu-miR-302d; mmu-let-7g; mmu-miR-195; mmu-miR-148b; mmu-miR-760-5p; mmu-miR-148a; mmu-miR-20b; mmu-miR-295; mmu-miR-23b; mmu-miR-377; mmu-miR-152; mmu-miR-335-3p; mmu-miR-378; mmu-miR-15a; mmu-miR-183; mmu-let-7e; mmu-miR-32…
1810019J16RIK	1.512	6	3.96825	mmu-miR-103; mmu-miR-297c; mmu-miR-132; mmu-miR-134; mmu-miR-421; mmu-miR-297a
1810022K09RIK	0.089	1	11.236	mmu-miR-335-3p
1810024B03RIK	2.364	51	21.5736	mmu-miR-145; mmu-miR-29b; mmu-miR-467e; mmu-miR-495; mmu-miR-466g; mmu-miR-467c; mmu-miR-340-5p; mmu-miR-291a-5p; mmu-miR-669o-5p; mmu-miR-181a; mmu-miR-21; mmu-miR-29c; mmu-miR-205; mmu-miR-290-3p; mmu-miR-367; mmu-miR-291b-5p; mmu-miR-669o-3p; mmu-miR-27a; mmu-miR-467a; mmu-miR-1198-5p; mmu-miR-467h; mmu-miR-1983; mmu-miR-103; mmu-miR-129-2-3p; mmu-miR-292-3p; mmu-miR-421; mmu-miR-129-1-3p; mmu…
1810026J23RIK	2.821	57	20.2056	mmu-miR-495; mmu-miR-335-5p; mmu-miR-804; mmu-miR-130a; mmu-miR-96; mmu-miR-466g; mmu-miR-19a; mmu-miR-130b; mmu-miR-674; mmu-miR-291a-5p; mmu-miR-205; mmu-miR-669f-3p; mmu-miR-367; mmu-miR-291b-5p; mmu-miR-132; mmu-miR-34a; mmu-miR-27a; mmu-miR-1983; mmu-miR-182; mmu-miR-103; mmu-miR-468; mmu-miR-1952; mmu-miR-302a; mmu-miR-19b; mmu-miR-466a-3p; mmu-miR-302d; mmu-miR-32; mmu-miR-433; mmu-miR-350…
1810030O07RIK	1.771	33	18.6335	mmu-miR-200a; mmu-miR-145; mmu-miR-804; mmu-miR-130a; mmu-miR-96; mmu-miR-431; mmu-miR-130b; mmu-miR-674; mmu-miR-340-5p; mmu-miR-467f; mmu-miR-669f-3p; mmu-miR-543; mmu-miR-669o-3p; mmu-miR-34a; mmu-miR-468; mmu-miR-182; mmu-miR-129-2-3p; mmu-miR-381; mmu-miR-129-1-3p; mmu-miR-669a-3p; mmu-miR-124; mmu-miR-350; mmu-miR-762; mmu-miR-141; mmu-miR-330; mmu-miR-34c; mmu-miR-335-3p; mmu-miR-301a; mmu…
1810032O08RIK	11.992	23	1.91795	mmu-miR-195; mmu-miR-124; mmu-miR-495; mmu-miR-96; mmu-miR-125a-5p; mmu-miR-16; mmu-miR-1198-3p; mmu-miR-760-5p; mmu-miR-125b-5p; mmu-miR-340-5p; mmu-miR-376c; mmu-miR-762; mmu-miR-181a; mmu-miR-330; mmu-miR-15a; mmu-miR-193b; mmu-miR-183; mmu-miR-103; mmu-miR-329; mmu-miR-1224; mmu-miR-142-5p; mmu-miR-672; mmu-miR-15b
1810037I17RIK	0.715	21	29.3706	mmu-miR-302d; mmu-miR-350; mmu-miR-335-5p; mmu-miR-374; mmu-miR-466g; mmu-miR-467c; mmu-miR-369-3p; mmu-miR-295; mmu-miR-30d; mmu-miR-466b-3p; mmu-miR-30a; mmu-miR-466c-3p; mmu-miR-291b-3p; mmu-miR-290-3p; mmu-miR-22; mmu-miR-467a; mmu-miR-30b; mmu-miR-291a-3p; mmu-miR-292-3p; mmu-miR-302a; mmu-miR-294
1810043G02RIK	2.032	28	13.7795	mmu-miR-302d; mmu-miR-124; mmu-miR-93; mmu-miR-96; mmu-miR-760-5p; mmu-miR-20b; mmu-miR-150; mmu-miR-295; mmu-miR-20a; mmu-miR-466b-3p; mmu-miR-466c-3p; mmu-miR-34c; mmu-miR-205; mmu-miR-760-3p; mmu-miR-132; mmu-miR-22; mmu-miR-34a; mmu-miR-106b; mmu-miR-183; mmu-miR-182; mmu-miR-103; mmu-miR-106a; mmu-miR-291a-3p; mmu-miR-17; mmu-miR-1224; mmu-miR-292-5p; mmu-miR-302a; mmu-miR-294
1810043H04RIK	0.531	5	9.4162	mmu-miR-329; mmu-miR-381; mmu-miR-292-5p; mmu-miR-28; mmu-miR-410
1810055G02RIK	1.391	32	23.005	mmu-miR-29b; mmu-miR-713; mmu-miR-96; mmu-miR-467c; mmu-miR-29c; mmu-miR-290-3p; mmu-miR-367; mmu-miR-467a; mmu-miR-103; mmu-miR-182; mmu-miR-292-3p; mmu-miR-302a; mmu-miR-423-5p; mmu-miR-32; mmu-miR-302d; mmu-miR-433; mmu-miR-125a-5p; mmu-miR-760-5p; mmu-miR-669d; mmu-miR-484; mmu-miR-363-3p; mmu-miR-295; mmu-miR-125b-5p; mmu-miR-291b-3p; mmu-miR-330; mmu-miR-29a; mmu-miR-193b; mmu-miR-25; mmu-m…
1810062G17RIK	0.524	8	15.2672	mmu-miR-297c; mmu-miR-669f-3p; mmu-miR-378; mmu-miR-103; mmu-miR-484; mmu-miR-329; mmu-miR-381; mmu-miR-297a
2010001E11RIK	1.81	43	23.7569	mmu-miR-29b; mmu-miR-467e; mmu-miR-130a; mmu-miR-466g; mmu-miR-130b; mmu-miR-150; mmu-miR-467f; mmu-miR-291a-5p; mmu-miR-323-3p; mmu-miR-29c; mmu-miR-669f-3p; mmu-miR-291b-5p; mmu-miR-27a; mmu-miR-467h; mmu-miR-468; mmu-miR-1983; mmu-miR-129-2-3p; mmu-miR-1952; mmu-miR-381; mmu-miR-129-1-3p; mmu-miR-466a-3p; mmu-miR-142-3p; mmu-miR-124; mmu-miR-669l; mmu-miR-125a-5p; mmu-miR-760-5p; mmu-miR-669f-…
2010012O05RIK	1.868	35	18.7366	mmu-miR-335-5p; mmu-miR-713; mmu-miR-150; mmu-miR-467f; mmu-miR-296-5p; mmu-miR-367; mmu-let-7a; mmu-miR-1198-5p; mmu-miR-202-3p; mmu-miR-421; mmu-miR-381; mmu-let-7g; mmu-miR-195; mmu-miR-32; mmu-miR-142-3p; mmu-miR-350; mmu-miR-669l; mmu-miR-16; mmu-miR-669d; mmu-miR-363-3p; mmu-miR-669f-5p; mmu-miR-376c; mmu-let-7c; mmu-miR-330; mmu-miR-335-3p; mmu-miR-134; mmu-miR-669a-5p; mmu-miR-15a; mmu-mi…
2010015L04RIK	1.746	24	13.7457	mmu-miR-142-3p; mmu-miR-200a; mmu-miR-124; mmu-miR-713; mmu-miR-804; mmu-miR-125a-5p; mmu-miR-431; mmu-miR-760-5p; mmu-miR-467c; mmu-miR-669d; mmu-miR-150; mmu-miR-674; mmu-miR-125b-5p; mmu-miR-762; mmu-miR-741; mmu-miR-141; mmu-miR-1945; mmu-miR-293; mmu-miR-378; mmu-miR-103; mmu-miR-1224; mmu-miR-1952; mmu-miR-672; mmu-miR-466f
2010107E04RIK	0.163	7	42.9448	mmu-miR-669d; mmu-miR-155; mmu-miR-467e; mmu-miR-495; mmu-miR-340-5p; mmu-miR-27a; mmu-miR-467h
2010300C02RIK	1.446	14	9.68188	mmu-miR-34c; mmu-miR-467e; mmu-miR-132; mmu-miR-543; mmu-miR-22; mmu-miR-34a; mmu-miR-713; mmu-miR-27a; mmu-miR-30b; mmu-miR-193b; mmu-miR-467h; mmu-miR-674; mmu-miR-30d; mmu-miR-30a
2200002D01RIK	2.628	24	9.13242	mmu-let-7g; mmu-miR-136; mmu-miR-374; mmu-miR-484; mmu-miR-150; mmu-miR-720; mmu-miR-18b; mmu-let-7c; mmu-miR-28; mmu-miR-34c; mmu-miR-760-3p; mmu-let-7a; mmu-miR-34a; mmu-miR-1893; mmu-miR-22; mmu-miR-183; mmu-miR-193b; mmu-miR-1983; mmu-let-7e; mmu-miR-329; mmu-miR-26b; mmu-miR-26a; mmu-miR-1935; mmu-miR-423-5p
2210016F16RIK	1.964	34	17.3116	mmu-miR-335-5p; mmu-miR-96; mmu-miR-150; mmu-miR-674; mmu-miR-466b-3p; mmu-miR-205; mmu-miR-367; mmu-miR-27a; mmu-miR-468; mmu-miR-182; mmu-miR-129-2-3p; mmu-miR-421; mmu-miR-381; mmu-miR-1952; mmu-miR-129-1-3p; mmu-miR-195; mmu-miR-32; mmu-miR-136; mmu-miR-125a-5p; mmu-miR-16; mmu-miR-374; mmu-miR-760-5p; mmu-miR-363-3p; mmu-miR-484; mmu-miR-125b-5p; mmu-miR-376c; mmu-miR-466c-3p; mmu-miR-134; m…
2210016L21RIK	4.885	31	6.34596	mmu-miR-195; mmu-miR-297c; mmu-miR-713; mmu-miR-136; mmu-miR-16; mmu-miR-466g; mmu-miR-484; mmu-miR-150; mmu-miR-762; mmu-miR-101b; mmu-miR-34c; mmu-miR-330; mmu-miR-335-3p; mmu-miR-155; mmu-miR-134; mmu-miR-760-3p; mmu-miR-543; mmu-miR-22; mmu-miR-34a; mmu-miR-15a; mmu-miR-378; mmu-miR-193b; mmu-miR-1983; mmu-miR-103; mmu-miR-468; mmu-miR-1224; mmu-miR-297a; mmu-miR-1935; mmu-miR-15b; mmu-miR-41…
2210018M11RIK	4.051	79	19.5014	mmu-miR-495; mmu-miR-335-5p; mmu-miR-713; mmu-miR-804; mmu-miR-93; mmu-miR-96; mmu-miR-466g; mmu-miR-19a; mmu-miR-20a; mmu-miR-30d; mmu-miR-466b-3p; mmu-miR-30a; mmu-miR-323-3p; mmu-miR-29c; mmu-miR-669f-3p; mmu-miR-541; mmu-miR-106a; mmu-miR-468; mmu-miR-17; mmu-miR-129-2-3p; mmu-miR-381; mmu-miR-129-1-3p; mmu-miR-302a; mmu-miR-669a-3p; mmu-miR-466a-3p; mmu-miR-302d; mmu-miR-148b; mmu-miR-1198-3…
2210408I21RIK	0.791	11	13.9064	mmu-miR-21; mmu-miR-124; mmu-miR-1960; mmu-miR-205; mmu-miR-297c; mmu-miR-350; mmu-miR-132; mmu-miR-134; mmu-miR-376b; mmu-miR-154; mmu-miR-297a
2300009A05RIK	0.229	11	48.0349	mmu-miR-205; mmu-miR-132; mmu-miR-134; mmu-miR-429; mmu-miR-200b; mmu-miR-374; mmu-miR-183; mmu-miR-329; mmu-miR-200c; mmu-miR-369-3p; mmu-miR-142-5p
2310008H04RIK	0.559	20	35.7782	mmu-miR-195; mmu-miR-669a-3p; mmu-miR-142-3p; mmu-miR-200a; mmu-miR-16; mmu-miR-374; mmu-miR-466g; mmu-miR-674; mmu-miR-369-3p; mmu-miR-291a-5p; mmu-miR-141; mmu-miR-291b-5p; mmu-miR-669o-3p; mmu-miR-22; mmu-miR-15a; mmu-miR-193b; mmu-miR-202-3p; mmu-miR-1952; mmu-miR-15b; mmu-miR-410
2310009B15RIK	0.195	3	15.3846	mmu-miR-23b; mmu-miR-382; mmu-miR-23a
2310014L17RIK	3.188	57	17.8795	mmu-miR-200a; mmu-miR-145; mmu-miR-93; mmu-miR-96; mmu-miR-466g; mmu-miR-19a; mmu-miR-20a; mmu-miR-28; mmu-miR-205; mmu-miR-367; mmu-let-7a; mmu-miR-34a; mmu-miR-1893; mmu-miR-468; mmu-miR-106a; mmu-miR-17; mmu-miR-202-3p; mmu-miR-302a; mmu-miR-19b; mmu-miR-466a-3p; mmu-miR-32; mmu-miR-302d; mmu-let-7g; mmu-miR-297c; mmu-miR-148b; mmu-miR-125a-5p; mmu-miR-760-5p; mmu-miR-1198-3p; mmu-miR-148a; mm…
2310022A10RIK	1.758	27	15.3584	mmu-let-7g; mmu-miR-148b; mmu-miR-1960; mmu-miR-350; mmu-miR-148a; mmu-miR-484; mmu-miR-720; mmu-miR-376c; mmu-miR-291a-5p; mmu-let-7c; mmu-miR-28; mmu-miR-434-3p; mmu-miR-330; mmu-miR-152; mmu-miR-290-3p; mmu-miR-134; mmu-miR-132; mmu-miR-291b-5p; mmu-let-7a; mmu-miR-27a; mmu-miR-467a; mmu-miR-193b; mmu-let-7e; mmu-miR-1224; mmu-miR-292-3p; mmu-miR-1935; mmu-miR-292-5p
2310022B05RIK	2.199	28	12.7331	mmu-miR-433; mmu-miR-1960; mmu-miR-29b; mmu-miR-335-5p; mmu-miR-96; mmu-miR-484; mmu-miR-674; mmu-miR-376c; mmu-miR-762; mmu-miR-291a-5p; mmu-miR-323-3p; mmu-miR-34c; mmu-miR-127; mmu-miR-29a; mmu-miR-29c; mmu-miR-291b-5p; mmu-miR-669f-3p; mmu-miR-134; mmu-miR-22; mmu-miR-34a; mmu-miR-193b; mmu-miR-182; mmu-miR-329; mmu-miR-1224; mmu-miR-33; mmu-miR-1952; mmu-miR-381; mmu-miR-421
2310030G06RIK	1.059	21	19.83	mmu-miR-93; mmu-miR-872; mmu-miR-19a; mmu-miR-20b; mmu-miR-20a; mmu-miR-23b; mmu-miR-466b-3p; mmu-miR-466c-3p; mmu-miR-291b-3p; mmu-miR-335-3p; mmu-miR-132; mmu-miR-376a; mmu-miR-106b; mmu-miR-191; mmu-miR-106a; mmu-miR-376b; mmu-miR-17; mmu-miR-154; mmu-miR-421; mmu-miR-23a; mmu-miR-19b
2310033P09RIK	0.512	6	11.7188	mmu-miR-330; mmu-miR-329; mmu-miR-760-3p; mmu-miR-335-5p; mmu-miR-762; mmu-miR-431
2310035C23RIK	3.372	54	16.0142	mmu-miR-145; mmu-miR-495; mmu-miR-335-5p; mmu-miR-93; mmu-miR-130a; mmu-miR-200b; mmu-miR-466g; mmu-miR-19a; mmu-miR-130b; mmu-miR-369-3p; mmu-miR-20a; mmu-miR-323-3p; mmu-miR-21; mmu-miR-155; mmu-miR-543; mmu-miR-1198-5p; mmu-miR-103; mmu-miR-106a; mmu-miR-17; mmu-miR-26b; mmu-miR-381; mmu-miR-302a; mmu-miR-19b; mmu-miR-466a-3p; mmu-miR-302d; mmu-miR-124; mmu-miR-148b; mmu-miR-669l; mmu-miR-429;…
2310039H08RIK	0.773	10	12.9366	mmu-miR-152; mmu-miR-127; mmu-miR-148b; mmu-miR-378; mmu-miR-96; mmu-miR-148a; mmu-miR-532-5p; mmu-miR-182; mmu-miR-672; mmu-miR-28
2310044G17RIK	3.583	48	13.3966	mmu-miR-145; mmu-miR-804; mmu-miR-200b; mmu-miR-467c; mmu-miR-674; mmu-miR-369-3p; mmu-miR-28; mmu-miR-669o-5p; mmu-miR-290-3p; mmu-miR-205; mmu-miR-132; mmu-miR-467a; mmu-miR-27a; mmu-miR-1198-5p; mmu-miR-468; mmu-miR-26b; mmu-miR-292-3p; mmu-miR-381; mmu-miR-302a; mmu-miR-302d; mmu-miR-297c; mmu-miR-669l; mmu-miR-429; mmu-miR-125a-5p; mmu-miR-760-5p; mmu-miR-669f-5p; mmu-miR-484; mmu-miR-295; m…
2310045N01RIK	3.137	38	12.1135	mmu-miR-145; mmu-miR-335-5p; mmu-miR-96; mmu-miR-200b; mmu-miR-466g; mmu-miR-155; mmu-miR-27a; mmu-miR-182; mmu-miR-129-2-3p; mmu-miR-154; mmu-miR-129-1-3p; mmu-miR-148b; mmu-miR-1960; mmu-miR-297c; mmu-miR-669l; mmu-miR-429; mmu-miR-125a-5p; mmu-miR-872; mmu-miR-148a; mmu-miR-669d; mmu-miR-484; mmu-miR-669f-5p; mmu-miR-125b-5p; mmu-miR-18b; mmu-miR-23b; mmu-miR-377; mmu-miR-152; mmu-miR-760-3p; …
2310047M10RIK	1.802	21	11.6537	mmu-miR-195; mmu-miR-125a-5p; mmu-miR-16; mmu-miR-872; mmu-miR-760-5p; mmu-miR-150; mmu-miR-18b; mmu-miR-125b-5p; mmu-miR-296-5p; mmu-miR-762; mmu-miR-377; mmu-miR-181a; mmu-miR-21; mmu-miR-127; mmu-miR-155; mmu-miR-15a; mmu-miR-423-3p; mmu-miR-1983; mmu-miR-1952; mmu-miR-154; mmu-miR-15b
2310057M21RIK	1.087	32	29.4388	mmu-miR-466a-3p; mmu-miR-200a; mmu-miR-29b; mmu-miR-350; mmu-miR-495; mmu-miR-713; mmu-miR-136; mmu-miR-374; mmu-miR-466g; mmu-miR-369-3p; mmu-miR-30d; mmu-miR-101b; mmu-miR-28; mmu-miR-30a; mmu-miR-377; mmu-miR-291b-3p; mmu-miR-141; mmu-miR-21; mmu-miR-330; mmu-miR-29c; mmu-miR-29a; mmu-miR-205; mmu-miR-335-3p; mmu-miR-132; mmu-miR-669f-3p; mmu-miR-1198-5p; mmu-miR-30b; mmu-miR-1983; mmu-miR-376…
2310067B10RIK	2.184	12	5.49451	mmu-miR-181a; mmu-miR-145; mmu-miR-760-3p; mmu-miR-335-5p; mmu-miR-103; mmu-miR-468; mmu-miR-150; mmu-miR-674; mmu-miR-296-5p; mmu-miR-762; mmu-miR-292-5p; mmu-miR-423-5p
2410002F23RIK	10.242	41	4.00312	mmu-miR-200a; mmu-miR-467e; mmu-miR-93; mmu-miR-466g; mmu-miR-467c; mmu-miR-20a; mmu-miR-340-5p; mmu-miR-296-5p; mmu-miR-290-3p; mmu-miR-467a; mmu-miR-27a; mmu-miR-1198-5p; mmu-miR-467h; mmu-miR-106a; mmu-miR-103; mmu-miR-1983; mmu-miR-17; mmu-miR-292-3p; mmu-miR-302a; mmu-miR-302d; mmu-miR-142-3p; mmu-miR-297c; mmu-miR-350; mmu-miR-136; mmu-miR-20b; mmu-miR-295; mmu-miR-18b; mmu-miR-762; mmu-miR…
2410004B18RIK	3.751	21	5.59851	mmu-miR-142-3p; mmu-miR-124; mmu-miR-148b; mmu-miR-1960; mmu-miR-350; mmu-miR-136; mmu-miR-148a; mmu-miR-431; mmu-miR-340-5p; mmu-miR-101b; mmu-miR-291b-3p; mmu-miR-152; mmu-miR-330; mmu-miR-27a; mmu-miR-182; mmu-miR-376b; mmu-miR-103; mmu-miR-1224; mmu-miR-381; mmu-miR-1935; mmu-miR-292-5p
2410004P03RIK	1.307	15	11.4767	mmu-let-7g; mmu-miR-330; mmu-miR-145; mmu-let-7a; mmu-miR-134; mmu-miR-760-3p; mmu-miR-136; mmu-let-7e; mmu-miR-484; mmu-miR-329; mmu-miR-376c; mmu-miR-762; mmu-miR-292-5p; mmu-let-7c; mmu-miR-377
2410012M07RIK	1.82	40	21.978	mmu-miR-145; mmu-miR-467c; mmu-miR-340-5p; mmu-miR-466b-3p; mmu-miR-30d; mmu-miR-323-3p; mmu-miR-30a; mmu-miR-28; mmu-miR-434-3p; mmu-miR-290-3p; mmu-let-7a; mmu-miR-1893; mmu-miR-467a; mmu-miR-30b; mmu-miR-103; mmu-miR-202-3p; mmu-miR-292-3p; mmu-miR-302a; mmu-let-7g; mmu-miR-195; mmu-miR-302d; mmu-miR-1960; mmu-miR-350; mmu-miR-16; mmu-miR-295; mmu-miR-762; mmu-miR-376c; mmu-let-7c; mmu-miR-151…
2410015M20RIK	0.39	12	30.7692	mmu-let-7g; mmu-miR-155; mmu-let-7a; mmu-miR-22; mmu-miR-760-5p; mmu-miR-468; mmu-let-7e; mmu-miR-202-3p; mmu-miR-376c; mmu-let-7c; mmu-miR-377; mmu-miR-323-3p
2410016O06RIK	2.346	32	13.6402	mmu-let-7g; mmu-miR-195; mmu-miR-32; mmu-miR-145; mmu-miR-350; mmu-miR-713; mmu-miR-96; mmu-miR-16; mmu-miR-431; mmu-miR-760-5p; mmu-miR-363-3p; mmu-miR-484; mmu-miR-150; mmu-miR-296-5p; mmu-let-7c; mmu-miR-28; mmu-miR-330; mmu-miR-181a; mmu-miR-127; mmu-let-7a; mmu-miR-367; mmu-miR-293; mmu-miR-22; mmu-miR-15a; mmu-miR-423-3p; mmu-miR-25; mmu-miR-182; mmu-let-7e; mmu-miR-103; mmu-miR-202-3p; mmu…
2410066E13RIK	4.874	64	13.1309	mmu-miR-145; mmu-miR-29b; mmu-miR-467e; mmu-miR-495; mmu-miR-335-5p; mmu-miR-713; mmu-miR-804; mmu-miR-96; mmu-miR-431; mmu-miR-466g; mmu-miR-150; mmu-miR-674; mmu-miR-291a-5p; mmu-miR-181a; mmu-miR-29c; mmu-miR-291b-5p; mmu-miR-27a; mmu-miR-467h; mmu-miR-103; mmu-miR-182; mmu-miR-1983; mmu-miR-302a; mmu-miR-302d; mmu-miR-195; mmu-miR-350; mmu-miR-297c; mmu-miR-148b; mmu-miR-1960; mmu-miR-136; mm…
2410076I21RIK	0.545	10	18.3486	mmu-miR-330; mmu-miR-205; mmu-miR-22; mmu-miR-429; mmu-miR-200b; mmu-miR-376b; mmu-miR-369-3p; mmu-miR-329; mmu-miR-674; mmu-miR-200c
2410089E03RIK	0.488	12	24.5902	mmu-miR-152; mmu-miR-148b; mmu-miR-1960; mmu-miR-669l; mmu-miR-429; mmu-miR-669a-5p; mmu-miR-200b; mmu-miR-148a; mmu-miR-669f-5p; mmu-miR-200c; mmu-miR-421; mmu-miR-323-3p
2410124H12RIK	0.323	7	21.6718	mmu-miR-468; mmu-miR-145; mmu-miR-495; mmu-miR-291b-5p; mmu-miR-672; mmu-miR-291a-5p; mmu-miR-183
2410131K14RIK	4.994	77	15.4185	mmu-miR-713; mmu-miR-804; mmu-miR-93; mmu-miR-431; mmu-miR-466g; mmu-miR-20a; mmu-miR-340-5p; mmu-miR-30d; mmu-miR-28; mmu-miR-30a; mmu-miR-323-3p; mmu-miR-434-3p; mmu-miR-29c; mmu-miR-290-3p; mmu-miR-669f-3p; mmu-miR-106a; mmu-miR-17; mmu-miR-129-2-3p; mmu-miR-292-3p; mmu-miR-381; mmu-miR-129-1-3p; mmu-miR-302a; mmu-miR-466a-3p; mmu-miR-302d; mmu-miR-195; mmu-miR-124; mmu-miR-148b; mmu-miR-136; …
2510002D24RIK	1.069	13	12.1609	mmu-miR-152; mmu-miR-145; mmu-miR-148b; mmu-miR-1960; mmu-miR-350; mmu-miR-148a; mmu-miR-431; mmu-miR-674; mmu-miR-26b; mmu-miR-18b; mmu-miR-26a; mmu-miR-762; mmu-miR-323-3p
2510003E04RIK	7.364	41	5.56763	mmu-miR-145; mmu-miR-335-5p; mmu-miR-713; mmu-miR-804; mmu-miR-466g; mmu-miR-19a; mmu-miR-150; mmu-miR-466b-3p; mmu-miR-28; mmu-miR-181a; mmu-miR-205; mmu-miR-543; mmu-miR-27a; mmu-miR-129-2-3p; mmu-miR-26b; mmu-miR-1952; mmu-miR-421; mmu-miR-154; mmu-miR-129-1-3p; mmu-miR-19b; mmu-miR-195; mmu-miR-136; mmu-miR-125a-5p; mmu-miR-16; mmu-miR-760-5p; mmu-miR-669d; mmu-miR-484; mmu-miR-720; mmu-miR-1…
2510009E07RIK	4.714	78	16.5465	mmu-miR-145; mmu-miR-495; mmu-miR-335-5p; mmu-miR-804; mmu-miR-93; mmu-miR-96; mmu-miR-466g; mmu-miR-19a; mmu-miR-20a; mmu-miR-340-5p; mmu-miR-296-5p; mmu-miR-466b-3p; mmu-miR-290-3p; mmu-miR-155; mmu-miR-669f-3p; mmu-miR-106a; mmu-miR-17; mmu-miR-129-2-3p; mmu-miR-292-3p; mmu-miR-381; mmu-miR-672; mmu-miR-129-1-3p; mmu-miR-124; mmu-miR-148b; mmu-miR-669l; mmu-miR-136; mmu-miR-125a-5p; mmu-miR-11…
2510039O18RIK	0.714	16	22.409	mmu-miR-330; mmu-miR-152; mmu-miR-124; mmu-miR-148b; mmu-miR-1960; mmu-miR-132; mmu-miR-148a; mmu-miR-431; mmu-miR-669d; mmu-miR-19a; mmu-miR-150; mmu-miR-26b; mmu-miR-421; mmu-miR-18b; mmu-miR-26a; mmu-miR-19b
2610001J05RIK	6.012	43	7.15236	mmu-miR-495; mmu-miR-130a; mmu-miR-200b; mmu-miR-466g; mmu-miR-19a; mmu-miR-130b; mmu-miR-674; mmu-miR-369-3p; mmu-miR-340-5p; mmu-miR-296-5p; mmu-miR-28; mmu-miR-434-3p; mmu-miR-205; mmu-miR-155; mmu-miR-543; mmu-miR-132; mmu-miR-34a; mmu-miR-381; mmu-miR-421; mmu-miR-19b; mmu-miR-195; mmu-miR-433; mmu-miR-148b; mmu-miR-1960; mmu-miR-429; mmu-miR-136; mmu-miR-16; mmu-miR-374; mmu-miR-148a; mmu-m…
2610002J02RIK	3.731	16	4.28839	mmu-miR-152; mmu-miR-181a; mmu-miR-330; mmu-miR-124; mmu-miR-148b; mmu-miR-1960; mmu-miR-713; mmu-miR-130a; mmu-miR-136; mmu-miR-27a; mmu-miR-301a; mmu-miR-148a; mmu-miR-130b; mmu-miR-484; mmu-miR-674; mmu-miR-423-5p
2610002M06RIK	5.103	85	16.6569	mmu-miR-145; mmu-miR-495; mmu-miR-335-5p; mmu-miR-713; mmu-miR-804; mmu-miR-93; mmu-miR-431; mmu-miR-19a; mmu-miR-20a; mmu-miR-340-5p; mmu-miR-466b-3p; mmu-miR-323-3p; mmu-miR-21; mmu-miR-29c; mmu-miR-155; mmu-miR-669f-3p; mmu-let-7a; mmu-miR-106a; mmu-miR-129-2-3p; mmu-miR-17; mmu-miR-202-3p; mmu-miR-154; mmu-miR-129-1-3p; mmu-miR-302a; mmu-miR-669a-3p; mmu-miR-466a-3p; mmu-miR-302d; mmu-let-7g;…
2610008E11RIK	3.678	55	14.9538	mmu-miR-145; mmu-miR-495; mmu-miR-335-5p; mmu-miR-713; mmu-miR-804; mmu-miR-93; mmu-miR-150; mmu-miR-674; mmu-miR-20a; mmu-miR-340-5p; mmu-miR-30d; mmu-miR-28; mmu-miR-30a; mmu-miR-181a; mmu-let-7a; mmu-miR-669f-3p; mmu-miR-543; mmu-miR-669o-3p; mmu-miR-27a; mmu-miR-1198-5p; mmu-miR-30b; mmu-miR-541; mmu-miR-1983; mmu-miR-106a; mmu-miR-468; mmu-miR-17; mmu-miR-202-3p; mmu-miR-26b; mmu-miR-381; mm…
2610015P09RIK	24.258	90	3.71012	mmu-miR-145; mmu-miR-335-5p; mmu-miR-713; mmu-miR-804; mmu-miR-93; mmu-miR-431; mmu-miR-466g; mmu-miR-19a; mmu-miR-20a; mmu-miR-296-5p; mmu-miR-28; mmu-miR-323-3p; mmu-miR-21; mmu-miR-290-3p; mmu-miR-155; mmu-miR-669f-3p; mmu-miR-541; mmu-miR-106a; mmu-miR-468; mmu-miR-129-2-3p; mmu-miR-17; mmu-miR-292-3p; mmu-miR-129-1-3p; mmu-miR-302a; mmu-miR-466a-3p; mmu-miR-302d; mmu-miR-195; mmu-miR-136; mm…
2610018G03RIK	3.596	32	8.89878	mmu-miR-302d; mmu-miR-669a-3p; mmu-miR-124; mmu-miR-297c; mmu-miR-350; mmu-miR-495; mmu-miR-335-5p; mmu-miR-96; mmu-miR-669d; mmu-miR-295; mmu-miR-23b; mmu-miR-18b; mmu-miR-340-5p; mmu-miR-376c; mmu-miR-101b; mmu-miR-323-3p; mmu-miR-377; mmu-miR-34c; mmu-miR-335-3p; mmu-miR-132; mmu-miR-34a; mmu-miR-669o-3p; mmu-miR-182; mmu-miR-291a-3p; mmu-miR-26b; mmu-miR-1952; mmu-miR-33; mmu-miR-297a; mmu-mi…
2610019F03RIK	2.127	30	14.1044	mmu-miR-200a; mmu-miR-148b; mmu-miR-350; mmu-miR-669l; mmu-miR-335-5p; mmu-miR-136; mmu-miR-148a; mmu-miR-669f-5p; mmu-miR-150; mmu-miR-674; mmu-miR-23b; mmu-miR-101b; mmu-miR-151-5p; mmu-miR-377; mmu-miR-434-3p; mmu-miR-141; mmu-miR-181a; mmu-miR-152; mmu-miR-335-3p; mmu-miR-134; mmu-miR-543; mmu-miR-669a-5p; mmu-miR-27a; mmu-miR-1983; mmu-miR-129-2-3p; mmu-miR-329; mmu-miR-33; mmu-miR-129-1-3p;…
2610021A01RIK	3.281	51	15.544	mmu-miR-145; mmu-miR-495; mmu-miR-804; mmu-miR-130a; mmu-miR-96; mmu-miR-19a; mmu-miR-130b; mmu-miR-369-3p; mmu-miR-340-5p; mmu-miR-467f; mmu-miR-30d; mmu-miR-466b-3p; mmu-miR-28; mmu-miR-30a; mmu-miR-434-3p; mmu-miR-205; mmu-let-7a; mmu-miR-543; mmu-miR-669f-3p; mmu-miR-669o-3p; mmu-miR-1198-5p; mmu-miR-30b; mmu-miR-182; mmu-miR-468; mmu-miR-421; mmu-miR-19b; mmu-miR-669a-3p; mmu-miR-466a-3p; mm…
2610034B18RIK	1.49	22	14.7651	mmu-miR-124; mmu-miR-669l; mmu-miR-429; mmu-miR-804; mmu-miR-125a-5p; mmu-miR-200b; mmu-miR-1198-3p; mmu-miR-760-5p; mmu-miR-669f-5p; mmu-miR-125b-5p; mmu-miR-762; mmu-miR-291a-5p; mmu-miR-434-3p; mmu-miR-127; mmu-miR-134; mmu-miR-291b-5p; mmu-miR-669a-5p; mmu-miR-378; mmu-miR-103; mmu-miR-200c; mmu-miR-1224; mmu-miR-466f
2610301B20RIK	3.06	22	7.18954	mmu-miR-466a-3p; mmu-miR-145; mmu-miR-429; mmu-miR-713; mmu-miR-804; mmu-miR-200b; mmu-miR-369-3p; mmu-miR-762; mmu-miR-377; mmu-miR-101b; mmu-miR-34c; mmu-miR-669f-3p; mmu-miR-293; mmu-miR-34a; mmu-miR-27a; mmu-miR-532-5p; mmu-miR-183; mmu-miR-1224; mmu-miR-200c; mmu-miR-329; mmu-miR-421; mmu-miR-381
2610301G19RIK	0.771	26	33.7224	mmu-miR-302d; mmu-miR-495; mmu-miR-431; mmu-miR-467c; mmu-miR-19a; mmu-miR-484; mmu-miR-295; mmu-miR-762; mmu-miR-466b-3p; mmu-miR-291b-3p; mmu-miR-466c-3p; mmu-miR-669o-5p; mmu-miR-290-3p; mmu-miR-760-3p; mmu-miR-669f-3p; mmu-miR-22; mmu-miR-293; mmu-miR-467a; mmu-miR-532-5p; mmu-miR-182; mmu-miR-291a-3p; mmu-miR-381; mmu-miR-292-3p; mmu-miR-302a; mmu-miR-294; mmu-miR-19b
2610318N02RIK	0.228	3	13.1579	mmu-miR-350; mmu-miR-760-3p; mmu-miR-193b
2610507B11RIK	1.451	29	19.9862	mmu-let-7g; mmu-miR-195; mmu-miR-142-3p; mmu-miR-148b; mmu-miR-136; mmu-miR-96; mmu-miR-16; mmu-miR-148a; mmu-miR-760-5p; mmu-miR-150; mmu-miR-340-5p; mmu-miR-467f; mmu-miR-762; mmu-let-7c; mmu-miR-741; mmu-miR-21; mmu-miR-152; mmu-miR-330; mmu-miR-34c; mmu-let-7a; mmu-miR-34a; mmu-miR-15a; mmu-let-7e; mmu-miR-202-3p; mmu-miR-26b; mmu-miR-1952; mmu-miR-672; mmu-miR-26a; mmu-miR-15b
2610524H06RIK	0.791	25	31.6056	mmu-miR-195; mmu-miR-302d; mmu-miR-29b; mmu-miR-350; mmu-miR-335-5p; mmu-miR-130a; mmu-miR-16; mmu-miR-374; mmu-miR-19a; mmu-miR-130b; mmu-miR-295; mmu-miR-30d; mmu-miR-30a; mmu-miR-434-3p; mmu-miR-291b-3p; mmu-miR-29c; mmu-miR-29a; mmu-miR-15a; mmu-miR-301a; mmu-miR-30b; mmu-miR-291a-3p; mmu-miR-15b; mmu-miR-302a; mmu-miR-294; mmu-miR-19b
2610528J11RIK	1.5	12	8	mmu-miR-335-3p; mmu-miR-335-5p; mmu-miR-713; mmu-miR-136; mmu-miR-96; mmu-miR-125a-5p; mmu-miR-484; mmu-miR-182; mmu-miR-1224; mmu-miR-33; mmu-miR-125b-5p; mmu-miR-1935
2700029M09RIK	1.776	8	4.5045	mmu-miR-145; mmu-miR-335-3p; mmu-miR-804; mmu-miR-136; mmu-miR-142-5p; mmu-miR-340-5p; mmu-miR-381; mmu-miR-467f
2700049A03RIK	1.39	18	12.9496	mmu-miR-200a; mmu-miR-433; mmu-miR-124; mmu-miR-669l; mmu-miR-125a-5p; mmu-miR-466g; mmu-miR-19a; mmu-miR-669f-5p; mmu-miR-150; mmu-miR-125b-5p; mmu-miR-141; mmu-miR-205; mmu-miR-293; mmu-miR-669a-5p; mmu-miR-378; mmu-miR-1198-5p; mmu-miR-103; mmu-miR-19b
2700050L05RIK	5.201	38	7.30629	mmu-miR-200a; mmu-miR-467e; mmu-miR-335-5p; mmu-miR-713; mmu-miR-19a; mmu-miR-30d; mmu-miR-30a; mmu-miR-28; mmu-miR-434-3p; mmu-miR-669o-5p; mmu-miR-21; mmu-miR-543; mmu-miR-34a; mmu-miR-27a; mmu-miR-30b; mmu-miR-467h; mmu-miR-103; mmu-miR-26b; mmu-miR-381; mmu-miR-19b; mmu-miR-423-5p; mmu-miR-195; mmu-miR-142-3p; mmu-miR-124; mmu-miR-350; mmu-miR-16; mmu-miR-762; mmu-miR-741; mmu-miR-151-5p; mmu…
2700060E02RIK	0.836	16	19.1388	mmu-miR-495; mmu-miR-760-5p; mmu-miR-669d; mmu-miR-150; mmu-miR-674; mmu-miR-18b; mmu-miR-376c; mmu-miR-30d; mmu-miR-30a; mmu-miR-290-3p; mmu-miR-467a; mmu-miR-30b; mmu-miR-103; mmu-miR-421; mmu-miR-292-3p; mmu-miR-410
2700062C07RIK	0.497	15	30.1811	mmu-miR-181a; mmu-miR-1960; mmu-miR-290-3p; mmu-miR-291b-5p; mmu-miR-713; mmu-miR-467a; mmu-miR-376b; mmu-miR-103; mmu-miR-1224; mmu-miR-23b; mmu-miR-292-3p; mmu-miR-23a; mmu-miR-291a-5p; mmu-miR-151-5p; mmu-miR-741
2700094K13RIK	1.314	17	12.9376	mmu-miR-195; mmu-miR-145; mmu-miR-136; mmu-miR-16; mmu-miR-431; mmu-miR-720; mmu-miR-291a-5p; mmu-miR-21; mmu-miR-330; mmu-miR-291b-5p; mmu-miR-22; mmu-miR-15a; mmu-miR-183; mmu-miR-103; mmu-miR-1224; mmu-miR-421; mmu-miR-15b
2810004N23RIK	0.612	9	14.7059	mmu-miR-330; mmu-miR-124; mmu-miR-543; mmu-miR-27a; mmu-miR-191; mmu-miR-467c; mmu-miR-103; mmu-miR-674; mmu-miR-323-3p
2810006K23RIK	1.236	30	24.2718	mmu-let-7g; mmu-miR-302d; mmu-miR-145; mmu-miR-297c; mmu-miR-429; mmu-miR-804; mmu-miR-200b; mmu-miR-374; mmu-miR-150; mmu-miR-295; mmu-miR-720; mmu-let-7c; mmu-miR-323-3p; mmu-miR-330; mmu-miR-127; mmu-miR-155; mmu-let-7a; mmu-miR-532-5p; mmu-miR-541; mmu-miR-1983; mmu-let-7e; mmu-miR-103; mmu-miR-291a-3p; mmu-miR-202-3p; mmu-miR-200c; mmu-miR-672; mmu-miR-1935; mmu-miR-297a; mmu-miR-302a; mmu-m…
2810025M15RIK	0.367	8	21.7984	mmu-miR-25; mmu-miR-32; mmu-miR-363-3p; mmu-miR-376b; mmu-miR-205; mmu-miR-367; mmu-miR-292-5p; mmu-miR-431
2810032G03RIK	2.808	17	6.05413	mmu-miR-350; mmu-miR-467e; mmu-miR-495; mmu-miR-429; mmu-miR-713; mmu-miR-200b; mmu-miR-669d; mmu-miR-741; mmu-miR-330; mmu-miR-335-3p; mmu-miR-467h; mmu-miR-329; mmu-miR-200c; mmu-miR-33; mmu-miR-1952; mmu-miR-154; mmu-miR-423-5p
2810403A07RIK	1.371	24	17.5055	mmu-miR-466a-3p; mmu-miR-145; mmu-miR-96; mmu-miR-374; mmu-miR-19a; mmu-miR-674; mmu-miR-18b; mmu-miR-720; mmu-miR-467f; mmu-miR-291a-5p; mmu-miR-28; mmu-miR-741; mmu-miR-1196; mmu-miR-291b-3p; mmu-miR-34c; mmu-miR-335-3p; mmu-miR-205; mmu-miR-291b-5p; mmu-miR-34a; mmu-miR-191; mmu-miR-182; mmu-miR-33; mmu-miR-381; mmu-miR-19b
2810407C02RIK	2.593	52	20.054	mmu-miR-713; mmu-miR-804; mmu-miR-431; mmu-miR-150; mmu-miR-674; mmu-miR-369-3p; mmu-miR-340-5p; mmu-miR-466b-3p; mmu-miR-291a-5p; mmu-miR-434-3p; mmu-miR-155; mmu-miR-205; mmu-let-7a; mmu-miR-669f-3p; mmu-miR-543; mmu-miR-367; mmu-miR-291b-5p; mmu-miR-669o-3p; mmu-miR-27a; mmu-miR-1198-5p; mmu-miR-468; mmu-miR-26b; mmu-miR-202-3p; mmu-miR-381; mmu-miR-672; mmu-miR-669a-3p; mmu-miR-466a-3p; mmu-l…
2810408A11RIK	10.444	44	4.21295	mmu-miR-145; mmu-miR-713; mmu-miR-804; mmu-miR-130a; mmu-miR-431; mmu-miR-467c; mmu-miR-130b; mmu-miR-674; mmu-miR-291a-5p; mmu-miR-290-3p; mmu-miR-205; mmu-miR-291b-5p; mmu-miR-34a; mmu-miR-467a; mmu-miR-541; mmu-miR-1983; mmu-miR-182; mmu-miR-129-2-3p; mmu-miR-1952; mmu-miR-292-3p; mmu-miR-129-1-3p; mmu-miR-302a; mmu-miR-302d; mmu-miR-142-3p; mmu-miR-148b; mmu-miR-136; mmu-miR-148a; mmu-miR-484…
2810408M09RIK	3.482	29	8.32855	mmu-miR-466a-3p; mmu-miR-124; mmu-miR-148b; mmu-miR-1960; mmu-miR-495; mmu-miR-713; mmu-miR-136; mmu-miR-125a-5p; mmu-miR-148a; mmu-miR-466g; mmu-miR-760-5p; mmu-miR-484; mmu-miR-125b-5p; mmu-miR-376c; mmu-miR-762; mmu-miR-291a-5p; mmu-miR-669o-5p; mmu-miR-152; mmu-miR-335-3p; mmu-miR-205; mmu-miR-127; mmu-miR-291b-5p; mmu-miR-132; mmu-miR-378; mmu-miR-1198-5p; mmu-miR-292-5p; mmu-miR-410; mmu-mi…
2810417H13RIK	1.709	32	18.7244	mmu-miR-467e; mmu-miR-495; mmu-miR-804; mmu-miR-340-5p; mmu-miR-28; mmu-miR-543; mmu-miR-669o-3p; mmu-miR-467h; mmu-miR-103; mmu-miR-129-2-3p; mmu-miR-26b; mmu-miR-381; mmu-miR-129-1-3p; mmu-miR-669a-3p; mmu-miR-297c; mmu-miR-1960; mmu-miR-148b; mmu-miR-669l; mmu-miR-136; mmu-miR-148a; mmu-miR-669d; mmu-miR-669f-5p; mmu-miR-376c; mmu-miR-152; mmu-miR-335-3p; mmu-miR-669a-5p; mmu-miR-329; mmu-miR-…
2810428I15RIK	3.543	12	3.38696	mmu-miR-195; mmu-miR-760-3p; mmu-miR-15a; mmu-miR-16; mmu-miR-103; mmu-miR-1983; mmu-miR-468; mmu-miR-26b; mmu-miR-674; mmu-miR-26a; mmu-miR-762; mmu-miR-15b
2810459M11RIK	5.014	49	9.77264	mmu-miR-200a; mmu-miR-145; mmu-miR-495; mmu-miR-130a; mmu-miR-96; mmu-miR-200b; mmu-miR-130b; mmu-miR-674; mmu-miR-467f; mmu-miR-296-5p; mmu-miR-323-3p; mmu-miR-434-3p; mmu-miR-205; mmu-let-7a; mmu-miR-132; mmu-miR-27a; mmu-miR-182; mmu-miR-129-2-3p; mmu-miR-202-3p; mmu-miR-421; mmu-miR-129-1-3p; mmu-miR-466a-3p; mmu-let-7g; mmu-miR-195; mmu-miR-124; mmu-miR-148b; mmu-miR-1960; mmu-miR-429; mmu-m…
2810474O19RIK	2.134	23	10.7779	mmu-let-7g; mmu-miR-350; mmu-miR-495; mmu-miR-713; mmu-miR-804; mmu-miR-136; mmu-miR-669d; mmu-miR-674; mmu-miR-30d; mmu-let-7c; mmu-miR-30a; mmu-miR-181a; mmu-let-7a; mmu-miR-134; mmu-miR-378; mmu-miR-30b; mmu-let-7e; mmu-miR-26b; mmu-miR-202-3p; mmu-miR-421; mmu-miR-26a; mmu-miR-1935; mmu-miR-292-5p
2900011O08RIK	3.499	37	10.5744	mmu-miR-200a; mmu-miR-495; mmu-miR-713; mmu-miR-804; mmu-miR-431; mmu-miR-466g; mmu-miR-369-3p; mmu-miR-340-5p; mmu-miR-467f; mmu-miR-296-5p; mmu-miR-30d; mmu-miR-30a; mmu-miR-669f-3p; mmu-miR-669o-3p; mmu-miR-27a; mmu-miR-1198-5p; mmu-miR-30b; mmu-miR-541; mmu-miR-103; mmu-miR-154; mmu-miR-423-5p; mmu-miR-669a-3p; mmu-miR-297c; mmu-miR-872; mmu-miR-374; mmu-miR-484; mmu-miR-762; mmu-miR-377; mmu…
2900026A02RIK	4.795	56	11.6788	mmu-miR-29b; mmu-miR-335-5p; mmu-miR-431; mmu-miR-466g; mmu-miR-150; mmu-miR-674; mmu-miR-466b-3p; mmu-miR-30d; mmu-miR-28; mmu-miR-30a; mmu-miR-323-3p; mmu-miR-434-3p; mmu-miR-669o-5p; mmu-miR-29c; mmu-miR-205; mmu-miR-669f-3p; mmu-miR-27a; mmu-miR-30b; mmu-miR-1198-5p; mmu-miR-541; mmu-miR-103; mmu-miR-1983; mmu-miR-129-2-3p; mmu-miR-381; mmu-miR-421; mmu-miR-129-1-3p; mmu-miR-423-5p; mmu-miR-4…
2900055J20RIK	0.723	16	22.13	mmu-miR-434-3p; mmu-miR-152; mmu-miR-148b; mmu-miR-669l; mmu-miR-335-5p; mmu-miR-669a-5p; mmu-miR-378; mmu-miR-1198-5p; mmu-miR-148a; mmu-miR-103; mmu-miR-669f-5p; mmu-miR-202-3p; mmu-miR-674; mmu-miR-23b; mmu-miR-23a; mmu-miR-741
3110001D03RIK	0.416	7	16.8269	mmu-miR-19a; mmu-miR-350; mmu-miR-760-3p; mmu-miR-292-5p; mmu-miR-374; mmu-miR-19b; mmu-miR-466f
3110002H16RIK	0.548	9	16.4234	mmu-miR-155; mmu-miR-1960; mmu-miR-291b-5p; mmu-miR-760-3p; mmu-miR-27a; mmu-miR-193b; mmu-miR-1983; mmu-miR-762; mmu-miR-291a-5p
3110021A11RIK	2.879	64	22.2299	mmu-miR-467e; mmu-miR-495; mmu-miR-335-5p; mmu-miR-804; mmu-miR-96; mmu-miR-431; mmu-miR-466g; mmu-miR-467c; mmu-miR-150; mmu-miR-340-5p; mmu-miR-467f; mmu-miR-28; mmu-miR-21; mmu-miR-290-3p; mmu-miR-669f-3p; mmu-miR-1893; mmu-miR-467a; mmu-miR-1198-5p; mmu-miR-467h; mmu-miR-541; mmu-miR-182; mmu-miR-129-2-3p; mmu-miR-292-3p; mmu-miR-672; mmu-miR-129-1-3p; mmu-miR-302a; mmu-miR-423-5p; mmu-miR-46…
3110040N11RIK	2.187	24	10.9739	mmu-miR-195; mmu-miR-145; mmu-miR-148b; mmu-miR-1960; mmu-miR-335-5p; mmu-miR-96; mmu-miR-16; mmu-miR-148a; mmu-miR-150; mmu-miR-340-5p; mmu-miR-720; mmu-miR-30d; mmu-miR-30a; mmu-miR-330; mmu-miR-152; mmu-miR-15a; mmu-miR-30b; mmu-miR-193b; mmu-miR-182; mmu-miR-103; mmu-miR-1952; mmu-miR-142-5p; mmu-miR-33; mmu-miR-15b
3110043O21RIK	7.429	63	8.48028	mmu-miR-200a; mmu-miR-145; mmu-miR-29b; mmu-miR-495; mmu-miR-431; mmu-miR-466g; mmu-miR-467c; mmu-miR-19a; mmu-miR-150; mmu-miR-674; mmu-miR-340-5p; mmu-miR-296-5p; mmu-miR-30d; mmu-miR-30a; mmu-miR-21; mmu-miR-290-3p; mmu-miR-29c; mmu-miR-132; mmu-let-7a; mmu-miR-27a; mmu-miR-467a; mmu-miR-30b; mmu-miR-103; mmu-miR-182; mmu-miR-1983; mmu-miR-292-3p; mmu-miR-302a; mmu-miR-19b; mmu-miR-423-5p; mmu…
3110047P20RIK	9.061	121	13.3539	mmu-miR-145; mmu-miR-495; mmu-miR-335-5p; mmu-miR-93; mmu-miR-96; mmu-miR-466g; mmu-miR-20a; mmu-miR-340-5p; mmu-miR-466b-3p; mmu-miR-28; mmu-miR-323-3p; mmu-miR-434-3p; mmu-miR-155; mmu-miR-669f-3p; mmu-miR-367; mmu-let-7a; mmu-miR-191; mmu-miR-541; mmu-miR-106a; mmu-miR-468; mmu-miR-129-2-3p; mmu-miR-17; mmu-miR-202-3p; mmu-miR-154; mmu-miR-381; mmu-miR-129-1-3p; mmu-miR-302a; mmu-miR-669a-3p; …
3110057O12RIK	16.522	79	4.7815	mmu-miR-145; mmu-miR-335-5p; mmu-miR-713; mmu-miR-804; mmu-miR-96; mmu-miR-431; mmu-miR-340-5p; mmu-miR-30d; mmu-miR-30a; mmu-miR-323-3p; mmu-miR-29c; mmu-miR-669f-3p; mmu-miR-541; mmu-miR-468; mmu-miR-129-2-3p; mmu-miR-381; mmu-miR-129-1-3p; mmu-miR-302a; mmu-miR-466a-3p; mmu-miR-302d; mmu-miR-433; mmu-miR-148b; mmu-miR-1198-3p; mmu-miR-148a; mmu-miR-295; mmu-miR-23b; mmu-miR-34c; mmu-miR-152; m…
3110062M04RIK	9.275	44	4.74394	mmu-miR-495; mmu-miR-674; mmu-miR-340-5p; mmu-miR-30d; mmu-miR-296-5p; mmu-miR-30a; mmu-miR-28; mmu-miR-21; mmu-miR-205; mmu-miR-27a; mmu-miR-30b; mmu-miR-541; mmu-miR-182; mmu-miR-129-2-3p; mmu-miR-129-1-3p; mmu-miR-195; mmu-miR-433; mmu-miR-148b; mmu-miR-1960; mmu-miR-350; mmu-miR-136; mmu-miR-125a-5p; mmu-miR-16; mmu-miR-760-5p; mmu-miR-148a; mmu-miR-484; mmu-miR-125b-5p; mmu-miR-18b; mmu-miR-…
3110079O15RIK	0.131	3	22.9008	mmu-miR-29a; mmu-miR-29b; mmu-miR-29c
3222401L13RIK	2.831	50	17.6616	mmu-miR-145; mmu-miR-29b; mmu-miR-713; mmu-miR-130a; mmu-miR-96; mmu-miR-200b; mmu-miR-130b; mmu-miR-150; mmu-miR-340-5p; mmu-miR-466b-3p; mmu-miR-28; mmu-miR-29c; mmu-miR-205; mmu-miR-155; mmu-miR-132; mmu-let-7a; mmu-miR-669f-3p; mmu-miR-543; mmu-miR-34a; mmu-miR-27a; mmu-miR-182; mmu-miR-1983; mmu-miR-26b; mmu-let-7g; mmu-miR-124; mmu-miR-148b; mmu-miR-429; mmu-miR-136; mmu-miR-872; mmu-miR-76…
3300002I08RIK	1.357	14	10.3169	mmu-miR-195; mmu-miR-181a; mmu-miR-335-3p; mmu-miR-136; mmu-miR-15a; mmu-miR-27a; mmu-miR-1198-5p; mmu-miR-16; mmu-miR-376b; mmu-miR-468; mmu-miR-1224; mmu-miR-23b; mmu-miR-23a; mmu-miR-15b
3632451O06RIK	1.978	21	10.6168	mmu-miR-195; mmu-miR-200a; mmu-miR-16; mmu-miR-431; mmu-miR-150; mmu-miR-467f; mmu-miR-762; mmu-miR-141; mmu-miR-1945; mmu-miR-330; mmu-miR-155; mmu-miR-15a; mmu-miR-532-5p; mmu-miR-129-2-3p; mmu-miR-329; mmu-miR-381; mmu-miR-33; mmu-miR-672; mmu-miR-1935; mmu-miR-129-1-3p; mmu-miR-15b
4632415L05RIK	2.299	47	20.4437	mmu-miR-200a; mmu-miR-145; mmu-miR-713; mmu-miR-19a; mmu-miR-369-3p; mmu-miR-340-5p; mmu-miR-466b-3p; mmu-miR-669f-3p; mmu-miR-1198-5p; mmu-miR-103; mmu-miR-26b; mmu-miR-421; mmu-miR-381; mmu-miR-1952; mmu-miR-302a; mmu-miR-19b; mmu-miR-466a-3p; mmu-miR-195; mmu-miR-302d; mmu-miR-148b; mmu-miR-1960; mmu-miR-350; mmu-miR-669l; mmu-miR-374; mmu-miR-16; mmu-miR-148a; mmu-miR-669d; mmu-miR-669f-5p; m…
4632428N05RIK	11.349	61	5.37492	mmu-miR-145; mmu-miR-29b; mmu-miR-335-5p; mmu-miR-713; mmu-miR-93; mmu-miR-466g; mmu-miR-150; mmu-miR-674; mmu-miR-20a; mmu-miR-467f; mmu-miR-28; mmu-miR-21; mmu-miR-181a; mmu-miR-29c; mmu-miR-290-3p; mmu-miR-132; mmu-miR-669f-3p; mmu-miR-543; mmu-miR-34a; mmu-miR-27a; mmu-miR-467a; mmu-miR-106a; mmu-miR-17; mmu-miR-26b; mmu-miR-292-3p; mmu-miR-195; mmu-miR-124; mmu-miR-148b; mmu-miR-1960; mmu-mi…
4632434I11RIK	2.784	61	21.9109	mmu-miR-145; mmu-miR-29b; mmu-miR-495; mmu-miR-335-5p; mmu-miR-804; mmu-miR-431; mmu-miR-467c; mmu-miR-19a; mmu-miR-340-5p; mmu-miR-467f; mmu-miR-30d; mmu-miR-30a; mmu-miR-181a; mmu-miR-155; mmu-miR-29c; mmu-miR-290-3p; mmu-miR-205; mmu-miR-132; mmu-let-7a; mmu-miR-34a; mmu-miR-27a; mmu-miR-467a; mmu-miR-1198-5p; mmu-miR-30b; mmu-miR-468; mmu-miR-202-3p; mmu-miR-292-3p; mmu-miR-381; mmu-miR-421; …
4732440D04RIK	0.413	4	9.68523	mmu-miR-330; mmu-miR-34c; mmu-miR-34a; mmu-miR-296-5p
4833403I15RIK	0.231	10	43.29	mmu-miR-302d; mmu-miR-434-3p; mmu-miR-30b; mmu-miR-291a-3p; mmu-miR-295; mmu-miR-30d; mmu-miR-302a; mmu-miR-30a; mmu-miR-101b; mmu-miR-294
4833420G17RIK	0.391	15	38.3632	mmu-miR-141; mmu-miR-200a; mmu-miR-205; mmu-miR-335-3p; mmu-miR-291b-5p; mmu-miR-429; mmu-miR-200b; mmu-miR-374; mmu-miR-431; mmu-miR-200c; mmu-miR-1224; mmu-miR-329; mmu-miR-369-3p; mmu-miR-467f; mmu-miR-291a-5p
4833424O15RIK	5.784	58	10.0277	mmu-miR-29b; mmu-miR-467e; mmu-miR-93; mmu-miR-200b; mmu-miR-674; mmu-miR-20a; mmu-miR-467f; mmu-miR-340-5p; mmu-miR-296-5p; mmu-miR-291a-5p; mmu-miR-28; mmu-miR-323-3p; mmu-miR-434-3p; mmu-miR-181a; mmu-miR-155; mmu-miR-29c; mmu-miR-290-3p; mmu-let-7a; mmu-miR-291b-5p; mmu-miR-34a; mmu-miR-27a; mmu-miR-467a; mmu-miR-467h; mmu-miR-541; mmu-miR-103; mmu-miR-106a; mmu-miR-17; mmu-miR-292-3p; mmu-mi…
4833439L19RIK	7.603	37	4.8665	mmu-miR-495; mmu-miR-335-5p; mmu-miR-93; mmu-miR-431; mmu-miR-19a; mmu-miR-20a; mmu-miR-669o-5p; mmu-miR-181a; mmu-miR-27a; mmu-miR-1198-5p; mmu-miR-106a; mmu-miR-1983; mmu-miR-17; mmu-miR-672; mmu-miR-381; mmu-miR-1952; mmu-miR-19b; mmu-miR-423-5p; mmu-miR-433; mmu-miR-148b; mmu-miR-1960; mmu-miR-136; mmu-miR-148a; mmu-miR-20b; mmu-miR-762; mmu-miR-1196; mmu-miR-152; mmu-miR-330; mmu-miR-378; mm…
4921507P07RIK	1.215	19	15.6379	mmu-miR-669a-3p; mmu-miR-433; mmu-miR-124; mmu-miR-350; mmu-miR-467e; mmu-miR-713; mmu-miR-181a; mmu-miR-335-3p; mmu-miR-760-3p; mmu-miR-669o-3p; mmu-miR-378; mmu-miR-382; mmu-miR-1198-5p; mmu-miR-467h; mmu-miR-541; mmu-miR-376b; mmu-miR-154; mmu-miR-421; mmu-miR-423-5p
4921522P10RIK	1.734	42	24.2215	mmu-miR-145; mmu-miR-713; mmu-miR-96; mmu-miR-466b-3p; mmu-miR-30d; mmu-miR-30a; mmu-miR-669o-5p; mmu-miR-21; mmu-let-7a; mmu-miR-132; mmu-miR-30b; mmu-miR-468; mmu-miR-1983; mmu-miR-103; mmu-miR-182; mmu-miR-202-3p; mmu-let-7g; mmu-miR-466a-3p; mmu-miR-148b; mmu-miR-1960; mmu-miR-297c; mmu-miR-669l; mmu-miR-125a-5p; mmu-miR-760-5p; mmu-miR-148a; mmu-miR-669f-5p; mmu-miR-125b-5p; mmu-miR-23b; mmu…
4921524J17RIK	1.132	28	24.735	mmu-miR-466a-3p; mmu-miR-200a; mmu-miR-29b; mmu-miR-350; mmu-miR-429; mmu-miR-136; mmu-miR-200b; mmu-miR-374; mmu-miR-872; mmu-miR-150; mmu-miR-369-3p; mmu-miR-30d; mmu-miR-466b-3p; mmu-miR-30a; mmu-miR-377; mmu-miR-141; mmu-miR-1196; mmu-miR-466c-3p; mmu-miR-330; mmu-miR-181a; mmu-miR-29c; mmu-miR-29a; mmu-miR-543; mmu-miR-99b; mmu-miR-30b; mmu-miR-200c; mmu-miR-154; mmu-miR-410
4921536K21RIK	2.222	37	16.6517	mmu-miR-200a; mmu-miR-29b; mmu-miR-431; mmu-miR-466g; mmu-miR-150; mmu-miR-291a-5p; mmu-miR-323-3p; mmu-miR-28; mmu-miR-29c; mmu-miR-669f-3p; mmu-miR-291b-5p; mmu-miR-27a; mmu-miR-421; mmu-miR-423-5p; mmu-miR-195; mmu-miR-466a-3p; mmu-miR-124; mmu-miR-1960; mmu-miR-136; mmu-miR-872; mmu-miR-16; mmu-miR-760-5p; mmu-miR-762; mmu-miR-101b; mmu-miR-141; mmu-miR-1196; mmu-miR-330; mmu-miR-29a; mmu-miR…
4922501C03RIK	6.477	81	12.5058	mmu-miR-495; mmu-miR-804; mmu-miR-93; mmu-miR-96; mmu-miR-431; mmu-miR-466g; mmu-miR-19a; mmu-miR-20a; mmu-miR-340-5p; mmu-miR-30d; mmu-miR-466b-3p; mmu-miR-28; mmu-miR-30a; mmu-let-7a; mmu-miR-106a; mmu-miR-17; mmu-miR-129-2-3p; mmu-miR-202-3p; mmu-miR-154; mmu-miR-129-1-3p; mmu-miR-669a-3p; mmu-miR-195; mmu-let-7g; mmu-miR-433; mmu-miR-124; mmu-miR-148b; mmu-miR-136; mmu-miR-125a-5p; mmu-miR-76…
4922501L14RIK	0.694	11	15.8501	mmu-miR-1945; mmu-miR-34c; mmu-miR-34a; mmu-miR-423-3p; mmu-miR-466g; mmu-miR-760-5p; mmu-miR-669d; mmu-miR-129-2-3p; mmu-miR-33; mmu-miR-129-1-3p; mmu-miR-762
4922505E12RIK	2.055	37	18.0049	mmu-miR-466a-3p; mmu-miR-195; mmu-miR-29b; mmu-miR-136; mmu-miR-96; mmu-miR-16; mmu-miR-125a-5p; mmu-miR-1198-3p; mmu-miR-760-5p; mmu-miR-669d; mmu-miR-484; mmu-miR-125b-5p; mmu-miR-340-5p; mmu-miR-762; mmu-miR-466b-3p; mmu-miR-296-5p; mmu-miR-466c-3p; mmu-miR-434-3p; mmu-miR-34c; mmu-miR-330; mmu-miR-29a; mmu-miR-127; mmu-miR-29c; mmu-miR-205; mmu-miR-760-3p; mmu-miR-669f-3p; mmu-miR-34a; mmu-mi…
4930402H24RIK	18.321	104	5.67655	mmu-miR-145; mmu-miR-713; mmu-miR-93; mmu-miR-96; mmu-miR-431; mmu-miR-466g; mmu-miR-19a; mmu-miR-20a; mmu-miR-30d; mmu-miR-466b-3p; mmu-miR-30a; mmu-miR-323-3p; mmu-miR-434-3p; mmu-miR-290-3p; mmu-miR-155; mmu-miR-367; mmu-let-7a; mmu-miR-1893; mmu-miR-541; mmu-miR-106a; mmu-miR-17; mmu-miR-202-3p; mmu-miR-154; mmu-miR-292-3p; mmu-miR-672; mmu-miR-302a; mmu-miR-669a-3p; mmu-miR-302d; mmu-let-7g;…
4930422G04RIK	1.355	36	26.5683	mmu-miR-145; mmu-miR-93; mmu-miR-130a; mmu-miR-19a; mmu-miR-130b; mmu-miR-369-3p; mmu-miR-20a; mmu-miR-323-3p; mmu-miR-669o-5p; mmu-miR-669f-3p; mmu-miR-106a; mmu-miR-17; mmu-miR-302a; mmu-miR-19b; mmu-miR-195; mmu-miR-302d; mmu-miR-148b; mmu-miR-1960; mmu-miR-350; mmu-miR-669l; mmu-miR-16; mmu-miR-148a; mmu-miR-20b; mmu-miR-484; mmu-miR-669f-5p; mmu-miR-295; mmu-miR-377; mmu-miR-152; mmu-miR-669…
4930426L09RIK	1.459	24	16.4496	mmu-miR-29b; mmu-miR-495; mmu-miR-93; mmu-miR-96; mmu-miR-431; mmu-miR-669d; mmu-miR-484; mmu-miR-20b; mmu-miR-150; mmu-miR-20a; mmu-miR-18b; mmu-miR-296-5p; mmu-miR-377; mmu-miR-330; mmu-miR-29a; mmu-miR-29c; mmu-miR-106b; mmu-miR-468; mmu-miR-106a; mmu-miR-129-2-3p; mmu-miR-17; mmu-miR-1952; mmu-miR-129-1-3p; mmu-miR-1935
4930427A07RIK	2.617	36	13.7562	mmu-miR-145; mmu-miR-29b; mmu-miR-495; mmu-miR-713; mmu-miR-804; mmu-miR-150; mmu-miR-674; mmu-miR-28; mmu-miR-181a; mmu-miR-29c; mmu-miR-543; mmu-miR-367; mmu-miR-27a; mmu-miR-468; mmu-miR-129-2-3p; mmu-miR-129-1-3p; mmu-miR-195; mmu-miR-32; mmu-miR-136; mmu-miR-16; mmu-miR-669d; mmu-miR-363-3p; mmu-miR-484; mmu-miR-23b; mmu-miR-29a; mmu-miR-760-3p; mmu-miR-99b; mmu-miR-15a; mmu-miR-193b; mmu-mi…
4930429B21RIK	2.601	43	16.5321	mmu-miR-713; mmu-miR-466g; mmu-miR-150; mmu-miR-181a; mmu-miR-669f-3p; mmu-miR-132; mmu-miR-1198-5p; mmu-miR-191; mmu-miR-103; mmu-miR-26b; mmu-miR-202-3p; mmu-miR-672; mmu-miR-421; mmu-miR-381; mmu-miR-154; mmu-miR-423-5p; mmu-miR-148b; mmu-miR-1960; mmu-miR-297c; mmu-miR-350; mmu-miR-669l; mmu-miR-872; mmu-miR-125a-5p; mmu-miR-1198-3p; mmu-miR-148a; mmu-miR-669f-5p; mmu-miR-484; mmu-miR-125b-5p…
4930430F08RIK	1.487	30	20.1748	mmu-miR-466a-3p; mmu-miR-148b; mmu-miR-297c; mmu-miR-429; mmu-miR-200b; mmu-miR-374; mmu-miR-1198-3p; mmu-miR-148a; mmu-miR-23b; mmu-miR-340-5p; mmu-miR-467f; mmu-miR-291a-5p; mmu-miR-323-3p; mmu-miR-434-3p; mmu-miR-152; mmu-miR-21; mmu-miR-205; mmu-miR-335-3p; mmu-miR-291b-5p; mmu-miR-191; mmu-miR-468; mmu-miR-26b; mmu-miR-200c; mmu-miR-142-5p; mmu-miR-421; mmu-miR-26a; mmu-miR-297a; mmu-miR-292…
4930432K21RIK	0.866	7	8.08314	mmu-miR-103; mmu-miR-468; mmu-miR-124; mmu-miR-495; mmu-miR-1935; mmu-miR-292-5p; mmu-miR-760-5p
4930444A02RIK	3.041	47	15.4554	mmu-miR-29b; mmu-miR-335-5p; mmu-miR-713; mmu-miR-93; mmu-miR-467c; mmu-miR-150; mmu-miR-20a; mmu-miR-30d; mmu-miR-296-5p; mmu-miR-291a-5p; mmu-miR-30a; mmu-miR-29c; mmu-miR-290-3p; mmu-miR-205; mmu-miR-291b-5p; mmu-miR-132; mmu-miR-27a; mmu-miR-467a; mmu-miR-191; mmu-miR-30b; mmu-miR-1983; mmu-miR-103; mmu-miR-106a; mmu-miR-17; mmu-miR-292-3p; mmu-miR-302a; mmu-miR-302d; mmu-miR-195; mmu-miR-433…
4930447C04RIK	6.491	46	7.08674	mmu-miR-145; mmu-miR-495; mmu-miR-431; mmu-miR-466g; mmu-miR-369-3p; mmu-miR-467f; mmu-miR-291a-5p; mmu-miR-181a; mmu-miR-21; mmu-miR-155; mmu-miR-205; mmu-miR-543; mmu-miR-291b-5p; mmu-miR-132; mmu-miR-34a; mmu-miR-1198-5p; mmu-miR-26b; mmu-miR-1952; mmu-miR-154; mmu-miR-381; mmu-miR-421; mmu-miR-423-5p; mmu-miR-433; mmu-miR-297c; mmu-miR-669l; mmu-miR-136; mmu-miR-374; mmu-miR-669f-5p; mmu-miR-…
4930451C15RIK	5.549	48	8.65021	mmu-miR-200a; mmu-miR-145; mmu-miR-335-5p; mmu-miR-804; mmu-miR-150; mmu-miR-674; mmu-miR-467f; mmu-miR-466b-3p; mmu-miR-28; mmu-miR-132; mmu-miR-1198-5p; mmu-miR-468; mmu-miR-1983; mmu-miR-672; mmu-miR-1952; mmu-miR-423-5p; mmu-miR-142-3p; mmu-miR-148b; mmu-miR-1960; mmu-miR-297c; mmu-miR-669l; mmu-miR-136; mmu-miR-125a-5p; mmu-miR-374; mmu-miR-1198-3p; mmu-miR-148a; mmu-miR-669d; mmu-miR-669f-5…
4930452B06RIK	0.527	10	18.9753	mmu-miR-141; mmu-miR-142-3p; mmu-miR-200a; mmu-miR-543; mmu-miR-136; mmu-miR-129-2-3p; mmu-miR-129-1-3p; mmu-miR-296-5p; mmu-miR-28; mmu-miR-410
4930453N24RIK	10.142	73	7.19779	mmu-miR-495; mmu-miR-713; mmu-miR-804; mmu-miR-431; mmu-miR-466g; mmu-miR-340-5p; mmu-miR-466b-3p; mmu-miR-296-5p; mmu-miR-323-3p; mmu-miR-434-3p; mmu-miR-669f-3p; mmu-let-7a; mmu-miR-541; mmu-miR-381; mmu-miR-302a; mmu-miR-466a-3p; mmu-miR-302d; mmu-let-7g; mmu-miR-195; mmu-miR-124; mmu-miR-125a-5p; mmu-miR-1198-3p; mmu-miR-295; mmu-miR-720; mmu-miR-125b-5p; mmu-miR-23b; mmu-miR-466c-3p; mmu-miR…
4930503L19RIK	0.249	4	16.0643	mmu-miR-1983; mmu-miR-150; mmu-miR-134; mmu-miR-193b
4930505A04RIK	0.988	4	4.04858	mmu-miR-145; mmu-miR-150; mmu-miR-369-3p; mmu-miR-762
4930506M07RIK	3.702	35	9.45435	mmu-miR-495; mmu-miR-713; mmu-miR-93; mmu-miR-200b; mmu-miR-19a; mmu-miR-20a; mmu-miR-467f; mmu-miR-323-3p; mmu-miR-21; mmu-miR-132; mmu-miR-669o-3p; mmu-miR-106a; mmu-miR-103; mmu-miR-1983; mmu-miR-17; mmu-miR-26b; mmu-miR-19b; mmu-miR-423-5p; mmu-miR-669a-3p; mmu-miR-142-3p; mmu-miR-433; mmu-miR-429; mmu-miR-136; mmu-miR-125a-5p; mmu-miR-760-5p; mmu-miR-20b; mmu-miR-484; mmu-miR-125b-5p; mmu-mi…
4930523C07RIK	3.398	69	20.3061	mmu-miR-145; mmu-miR-335-5p; mmu-miR-713; mmu-miR-466g; mmu-miR-467c; mmu-miR-19a; mmu-miR-466b-3p; mmu-miR-296-5p; mmu-miR-28; mmu-miR-323-3p; mmu-miR-290-3p; mmu-miR-669f-3p; mmu-miR-367; mmu-let-7a; mmu-miR-129-2-3p; mmu-miR-202-3p; mmu-miR-292-3p; mmu-miR-129-1-3p; mmu-miR-302a; mmu-miR-669a-3p; mmu-miR-466a-3p; mmu-miR-302d; mmu-let-7g; mmu-miR-195; mmu-miR-433; mmu-miR-124; mmu-miR-148b; mm…
4930524B15RIK	1.658	31	18.6972	mmu-miR-466a-3p; mmu-miR-433; mmu-miR-145; mmu-miR-1960; mmu-miR-297c; mmu-miR-350; mmu-miR-713; mmu-miR-466g; mmu-miR-669d; mmu-miR-484; mmu-miR-23b; mmu-miR-340-5p; mmu-miR-466b-3p; mmu-miR-323-3p; mmu-miR-377; mmu-miR-466c-3p; mmu-miR-34c; mmu-miR-181a; mmu-miR-335-3p; mmu-miR-205; mmu-miR-543; mmu-miR-34a; mmu-miR-382; mmu-miR-532-5p; mmu-miR-103; mmu-miR-1224; mmu-miR-33; mmu-miR-1952; mmu-m…
4930550C14RIK	0.401	4	9.97506	mmu-miR-1196; mmu-miR-376b; mmu-miR-335-3p; mmu-miR-487b
4930579G24RIK	1.689	35	20.7223	mmu-miR-200b; mmu-miR-431; mmu-miR-19a; mmu-miR-150; mmu-miR-467f; mmu-miR-340-5p; mmu-miR-323-3p; mmu-miR-205; mmu-miR-132; mmu-miR-27a; mmu-miR-1198-5p; mmu-miR-468; mmu-miR-129-2-3p; mmu-miR-26b; mmu-miR-129-1-3p; mmu-miR-19b; mmu-miR-350; mmu-miR-669l; mmu-miR-429; mmu-miR-1198-3p; mmu-miR-669d; mmu-miR-669f-5p; mmu-miR-18b; mmu-miR-23b; mmu-miR-101b; mmu-miR-335-3p; mmu-miR-376a; mmu-miR-669…
4930579K19RIK	0.652	10	15.3374	mmu-miR-330; mmu-miR-34c; mmu-miR-495; mmu-miR-34a; mmu-miR-96; mmu-miR-125a-5p; mmu-miR-182; mmu-miR-125b-5p; mmu-miR-376c; mmu-miR-296-5p
4930589L23RIK	0.357	7	19.6078	mmu-miR-468; mmu-miR-29a; mmu-miR-29b; mmu-miR-29c; mmu-miR-329; mmu-miR-1198-5p; mmu-miR-292-5p
4931406P16RIK	7.635	84	11.002	mmu-miR-145; mmu-miR-495; mmu-miR-713; mmu-miR-804; mmu-miR-93; mmu-miR-96; mmu-miR-19a; mmu-miR-20a; mmu-miR-340-5p; mmu-miR-30d; mmu-miR-466b-3p; mmu-miR-28; mmu-miR-30a; mmu-miR-323-3p; mmu-miR-29c; mmu-let-7a; mmu-miR-669f-3p; mmu-miR-367; mmu-miR-541; mmu-miR-106a; mmu-miR-129-2-3p; mmu-miR-17; mmu-miR-202-3p; mmu-miR-129-1-3p; mmu-miR-302a; mmu-miR-466a-3p; mmu-miR-302d; mmu-let-7g; mmu-miR…
4931428F04RIK	3.47	27	7.78098	mmu-let-7g; mmu-miR-466a-3p; mmu-miR-433; mmu-miR-29b; mmu-miR-495; mmu-miR-335-5p; mmu-miR-713; mmu-miR-804; mmu-miR-150; mmu-miR-296-5p; mmu-miR-762; mmu-let-7c; mmu-miR-101b; mmu-miR-28; mmu-miR-377; mmu-miR-741; mmu-miR-29c; mmu-miR-29a; mmu-miR-205; mmu-let-7a; mmu-miR-27a; mmu-miR-378; mmu-miR-1198-5p; mmu-miR-376b; mmu-let-7e; mmu-miR-202-3p; mmu-miR-423-5p
4931429I11RIK	2.046	25	12.219	mmu-miR-148b; mmu-miR-297c; mmu-miR-93; mmu-miR-136; mmu-miR-148a; mmu-miR-20b; mmu-miR-20a; mmu-miR-34c; mmu-miR-152; mmu-miR-181a; mmu-miR-335-3p; mmu-miR-155; mmu-miR-205; mmu-miR-543; mmu-miR-34a; mmu-miR-106b; mmu-miR-1198-5p; mmu-miR-423-3p; mmu-miR-532-5p; mmu-miR-106a; mmu-miR-17; mmu-miR-329; mmu-miR-142-5p; mmu-miR-297a; mmu-miR-410
4931440F15RIK	3.274	43	13.1338	mmu-miR-495; mmu-miR-130a; mmu-miR-130b; mmu-miR-150; mmu-miR-296-5p; mmu-miR-669o-5p; mmu-miR-205; mmu-let-7a; mmu-miR-34a; mmu-miR-1983; mmu-miR-103; mmu-miR-129-2-3p; mmu-miR-202-3p; mmu-miR-381; mmu-miR-1952; mmu-miR-129-1-3p; mmu-miR-423-5p; mmu-let-7g; mmu-miR-195; mmu-miR-142-3p; mmu-miR-350; mmu-miR-124; mmu-miR-148b; mmu-miR-1960; mmu-miR-125a-5p; mmu-miR-16; mmu-miR-148a; mmu-miR-484; m…
4931440L10RIK	6.408	36	5.61798	mmu-miR-335-5p; mmu-miR-804; mmu-miR-96; mmu-miR-466g; mmu-miR-674; mmu-miR-369-3p; mmu-miR-466b-3p; mmu-miR-30d; mmu-miR-30a; mmu-miR-181a; mmu-miR-205; mmu-miR-27a; mmu-miR-30b; mmu-miR-1198-5p; mmu-miR-182; mmu-miR-1983; mmu-miR-1952; mmu-miR-672; mmu-miR-142-3p; mmu-miR-125a-5p; mmu-miR-374; mmu-miR-669d; mmu-miR-125b-5p; mmu-miR-18b; mmu-miR-762; mmu-miR-151-5p; mmu-miR-377; mmu-miR-466c-3p;…
4932431P20RIK	12.18	51	4.18719	mmu-miR-200a; mmu-miR-145; mmu-miR-335-5p; mmu-miR-804; mmu-miR-96; mmu-miR-19a; mmu-miR-150; mmu-miR-467f; mmu-miR-205; mmu-miR-132; mmu-miR-1198-5p; mmu-miR-541; mmu-miR-1983; mmu-miR-182; mmu-miR-103; mmu-miR-129-2-3p; mmu-miR-202-3p; mmu-miR-1952; mmu-miR-381; mmu-miR-129-1-3p; mmu-miR-19b; mmu-miR-195; mmu-miR-433; mmu-miR-297c; mmu-miR-148b; mmu-miR-1960; mmu-miR-136; mmu-miR-16; mmu-miR-76…
4932438A13RIK	11.13	59	5.30099	mmu-miR-145; mmu-miR-467e; mmu-miR-200b; mmu-miR-431; mmu-miR-19a; mmu-miR-674; mmu-miR-369-3p; mmu-miR-467f; mmu-miR-466b-3p; mmu-miR-30d; mmu-miR-30a; mmu-miR-669o-5p; mmu-miR-181a; mmu-miR-205; mmu-miR-132; mmu-miR-669f-3p; mmu-miR-367; mmu-miR-27a; mmu-miR-30b; mmu-miR-467h; mmu-miR-103; mmu-miR-468; mmu-miR-26b; mmu-miR-1952; mmu-miR-381; mmu-miR-421; mmu-miR-19b; mmu-miR-423-5p; mmu-miR-466…
4932442L08RIK	6.885	54	7.84314	mmu-miR-200a; mmu-miR-145; mmu-miR-335-5p; mmu-miR-713; mmu-miR-130a; mmu-miR-96; mmu-miR-467c; mmu-miR-19a; mmu-miR-130b; mmu-miR-150; mmu-miR-340-5p; mmu-miR-467f; mmu-miR-466b-3p; mmu-miR-290-3p; mmu-miR-467a; mmu-miR-1198-5p; mmu-miR-182; mmu-miR-26b; mmu-miR-292-3p; mmu-miR-421; mmu-miR-672; mmu-miR-302a; mmu-miR-19b; mmu-miR-302d; mmu-miR-433; mmu-miR-142-3p; mmu-miR-148b; mmu-miR-297c; mmu…
4933405L10RIK	0.584	9	15.411	mmu-miR-330; mmu-miR-1960; mmu-miR-191; mmu-miR-760-5p; mmu-miR-1983; mmu-miR-484; mmu-miR-1952; mmu-miR-1935; mmu-miR-423-5p
4933406J08RIK	1.587	32	20.1638	mmu-miR-350; mmu-miR-467e; mmu-miR-429; mmu-miR-713; mmu-miR-93; mmu-miR-200b; mmu-miR-1198-3p; mmu-miR-20b; mmu-miR-674; mmu-miR-369-3p; mmu-miR-20a; mmu-miR-23b; mmu-miR-340-5p; mmu-miR-467f; mmu-miR-30d; mmu-miR-30a; mmu-miR-1196; mmu-miR-434-3p; mmu-miR-669f-3p; mmu-miR-106b; mmu-miR-30b; mmu-miR-193b; mmu-miR-467h; mmu-miR-106a; mmu-miR-17; mmu-miR-200c; mmu-miR-26b; mmu-miR-33; mmu-miR-142-…
4933406P04RIK	1.789	37	20.6819	mmu-miR-145; mmu-miR-467e; mmu-miR-96; mmu-miR-431; mmu-miR-466g; mmu-miR-296-5p; mmu-miR-669o-5p; mmu-miR-155; mmu-miR-205; mmu-miR-367; mmu-miR-467h; mmu-miR-541; mmu-miR-182; mmu-miR-129-2-3p; mmu-miR-154; mmu-miR-672; mmu-miR-421; mmu-miR-129-1-3p; mmu-miR-32; mmu-miR-124; mmu-miR-148b; mmu-miR-1960; mmu-miR-872; mmu-miR-374; mmu-miR-148a; mmu-miR-363-3p; mmu-miR-484; mmu-miR-23b; mmu-miR-741…
4933411G11RIK	1.846	17	9.2091	mmu-miR-350; mmu-miR-713; mmu-miR-125a-5p; mmu-miR-374; mmu-miR-760-5p; mmu-miR-674; mmu-miR-369-3p; mmu-miR-125b-5p; mmu-miR-466b-3p; mmu-miR-466c-3p; mmu-miR-205; mmu-miR-543; mmu-miR-760-3p; mmu-miR-22; mmu-miR-376b; mmu-miR-329; mmu-miR-421
4933411K20RIK	9.018	75	8.3167	mmu-miR-495; mmu-miR-713; mmu-miR-93; mmu-miR-96; mmu-miR-431; mmu-miR-466g; mmu-miR-467c; mmu-miR-20a; mmu-miR-340-5p; mmu-miR-466b-3p; mmu-miR-290-3p; mmu-miR-669f-3p; mmu-miR-367; mmu-miR-541; mmu-miR-468; mmu-miR-106a; mmu-miR-17; mmu-miR-154; mmu-miR-292-3p; mmu-miR-302a; mmu-miR-669a-3p; mmu-miR-302d; mmu-miR-195; mmu-miR-433; mmu-miR-136; mmu-miR-20b; mmu-miR-295; mmu-miR-377; mmu-miR-466c…
4933416C03RIK	2.254	44	19.5209	mmu-miR-29b; mmu-miR-467e; mmu-miR-96; mmu-miR-674; mmu-miR-340-5p; mmu-miR-296-5p; mmu-miR-323-3p; mmu-miR-29c; mmu-let-7a; mmu-miR-669o-3p; mmu-miR-191; mmu-miR-467h; mmu-miR-182; mmu-miR-1983; mmu-miR-26b; mmu-miR-202-3p; mmu-miR-302a; mmu-miR-669a-3p; mmu-let-7g; mmu-miR-302d; mmu-miR-125a-5p; mmu-miR-484; mmu-miR-295; mmu-miR-125b-5p; mmu-miR-23b; mmu-miR-762; mmu-miR-376c; mmu-let-7c; mmu-m…
4933426M11RIK	3.74	59	15.7754	mmu-miR-335-5p; mmu-miR-93; mmu-miR-130a; mmu-miR-96; mmu-miR-431; mmu-miR-466g; mmu-miR-130b; mmu-miR-150; mmu-miR-20a; mmu-miR-340-5p; mmu-miR-30d; mmu-miR-30a; mmu-miR-205; mmu-miR-669f-3p; mmu-miR-34a; mmu-miR-27a; mmu-miR-1198-5p; mmu-miR-30b; mmu-miR-182; mmu-miR-103; mmu-miR-106a; mmu-miR-1983; mmu-miR-468; mmu-miR-17; mmu-miR-302a; mmu-miR-423-5p; mmu-miR-466a-3p; mmu-miR-302d; mmu-miR-12…
4933427G17RIK	0.536	7	13.0597	mmu-miR-484; mmu-miR-125b-5p; mmu-miR-142-5p; mmu-miR-340-5p; mmu-miR-713; mmu-miR-125a-5p; mmu-miR-28
4933430I17RIK	0.461	9	19.5228	mmu-miR-330; mmu-miR-669o-5p; mmu-miR-543; mmu-miR-669l; mmu-miR-22; mmu-miR-669a-5p; mmu-miR-872; mmu-miR-669f-5p; mmu-miR-672
5031414D18RIK	0.564	23	40.7801	mmu-miR-195; mmu-miR-200a; mmu-miR-148b; mmu-miR-350; mmu-miR-495; mmu-miR-130a; mmu-miR-16; mmu-miR-148a; mmu-miR-669d; mmu-miR-130b; mmu-miR-30d; mmu-miR-30a; mmu-miR-141; mmu-miR-152; mmu-miR-181a; mmu-miR-543; mmu-miR-132; mmu-miR-1893; mmu-miR-15a; mmu-miR-30b; mmu-miR-301a; mmu-miR-421; mmu-miR-15b
5031439G07RIK	17.493	89	5.08775	mmu-miR-145; mmu-miR-495; mmu-miR-93; mmu-miR-96; mmu-miR-431; mmu-miR-466g; mmu-miR-20a; mmu-miR-466b-3p; mmu-miR-28; mmu-miR-434-3p; mmu-miR-29c; mmu-miR-290-3p; mmu-miR-669f-3p; mmu-miR-367; mmu-let-7a; mmu-miR-1893; mmu-miR-106a; mmu-miR-129-2-3p; mmu-miR-17; mmu-miR-202-3p; mmu-miR-292-3p; mmu-miR-672; mmu-miR-129-1-3p; mmu-miR-302a; mmu-miR-302d; mmu-let-7g; mmu-miR-195; mmu-miR-669l; mmu-m…
5033430I15RIK	1.017	27	26.5487	mmu-miR-148b; mmu-miR-1960; mmu-miR-713; mmu-miR-130a; mmu-miR-125a-5p; mmu-miR-872; mmu-miR-1198-3p; mmu-miR-148a; mmu-miR-130b; mmu-miR-150; mmu-miR-674; mmu-miR-125b-5p; mmu-miR-762; mmu-miR-101b; mmu-miR-28; mmu-miR-152; mmu-miR-290-3p; mmu-miR-132; mmu-miR-760-3p; mmu-miR-1893; mmu-miR-467a; mmu-miR-301a; mmu-miR-182; mmu-miR-129-2-3p; mmu-miR-292-3p; mmu-miR-129-1-3p; mmu-miR-292-5p
5330417C22RIK	9.528	68	7.13686	mmu-miR-495; mmu-miR-93; mmu-miR-431; mmu-miR-19a; mmu-miR-20a; mmu-miR-340-5p; mmu-miR-106a; mmu-miR-17; mmu-miR-672; mmu-miR-302a; mmu-miR-302d; mmu-miR-433; mmu-miR-124; mmu-miR-148b; mmu-miR-125a-5p; mmu-miR-760-5p; mmu-miR-1198-3p; mmu-miR-148a; mmu-miR-20b; mmu-miR-295; mmu-miR-125b-5p; mmu-miR-377; mmu-miR-1196; mmu-miR-330; mmu-miR-152; mmu-miR-22; mmu-miR-532-5p; mmu-miR-1224; mmu-miR-20…
5330426P16RIK	1.881	45	23.9234	mmu-miR-200a; mmu-miR-145; mmu-miR-495; mmu-miR-130a; mmu-miR-130b; mmu-miR-150; mmu-miR-467f; mmu-miR-340-5p; mmu-miR-466b-3p; mmu-miR-323-3p; mmu-miR-132; mmu-miR-669o-3p; mmu-miR-34a; mmu-miR-27a; mmu-miR-1983; mmu-miR-26b; mmu-miR-154; mmu-miR-672; mmu-miR-302a; mmu-miR-669a-3p; mmu-miR-302d; mmu-miR-433; mmu-miR-1960; mmu-miR-136; mmu-miR-1198-3p; mmu-miR-484; mmu-miR-295; mmu-miR-23b; mmu-m…
5430403G16RIK	2.847	37	12.9961	mmu-miR-200a; mmu-miR-200b; mmu-miR-19a; mmu-miR-150; mmu-miR-674; mmu-miR-340-5p; mmu-miR-291a-5p; mmu-miR-181a; mmu-miR-205; mmu-miR-291b-5p; mmu-miR-34a; mmu-miR-1198-5p; mmu-miR-541; mmu-miR-468; mmu-miR-26b; mmu-miR-154; mmu-miR-302a; mmu-miR-19b; mmu-miR-302d; mmu-miR-429; mmu-miR-136; mmu-miR-295; mmu-miR-18b; mmu-miR-23b; mmu-miR-141; mmu-miR-34c; mmu-miR-335-3p; mmu-miR-376b; mmu-miR-291…
5730409E04RIK	5.392	40	7.4184	mmu-miR-145; mmu-miR-29b; mmu-miR-200b; mmu-miR-466g; mmu-miR-150; mmu-miR-467f; mmu-miR-466b-3p; mmu-miR-296-5p; mmu-miR-28; mmu-miR-181a; mmu-miR-29c; mmu-miR-669f-3p; mmu-miR-27a; mmu-miR-1983; mmu-miR-129-2-3p; mmu-miR-1952; mmu-miR-421; mmu-miR-129-1-3p; mmu-miR-466a-3p; mmu-miR-148b; mmu-miR-429; mmu-miR-760-5p; mmu-miR-148a; mmu-miR-669d; mmu-miR-484; mmu-miR-18b; mmu-miR-23b; mmu-miR-101b…
5730508B09RIK	1.313	23	17.5171	mmu-miR-466a-3p; mmu-miR-29b; mmu-miR-350; mmu-miR-495; mmu-miR-713; mmu-miR-96; mmu-miR-374; mmu-miR-369-3p; mmu-miR-466b-3p; mmu-miR-291a-5p; mmu-miR-323-3p; mmu-miR-466c-3p; mmu-miR-29a; mmu-miR-29c; mmu-miR-335-3p; mmu-miR-132; mmu-miR-291b-5p; mmu-miR-183; mmu-miR-182; mmu-miR-468; mmu-miR-1224; mmu-miR-421; mmu-miR-1935
5730522E02RIK	0.812	62	76.3547	mmu-miR-200a; mmu-miR-495; mmu-miR-713; mmu-miR-804; mmu-miR-466g; mmu-miR-150; mmu-miR-340-5p; mmu-miR-466b-3p; mmu-miR-30d; mmu-miR-291a-5p; mmu-miR-30a; mmu-miR-434-3p; mmu-miR-21; mmu-miR-205; mmu-miR-543; mmu-miR-291b-5p; mmu-miR-34a; mmu-miR-669o-3p; mmu-miR-1893; mmu-miR-27a; mmu-miR-1198-5p; mmu-miR-191; mmu-miR-30b; mmu-miR-468; mmu-miR-1952; mmu-miR-302a; mmu-miR-423-5p; mmu-miR-669a-3p…
5730559C18RIK	2.036	15	7.36739	mmu-miR-330; mmu-miR-124; mmu-miR-205; mmu-miR-713; mmu-miR-96; mmu-miR-191; mmu-miR-183; mmu-miR-760-5p; mmu-miR-541; mmu-miR-182; mmu-miR-33; mmu-miR-672; mmu-miR-296-5p; mmu-miR-1935; mmu-miR-423-5p
5830415F09RIK	0.894	10	11.1857	mmu-miR-29a; mmu-miR-29b; mmu-miR-29c; mmu-miR-335-5p; mmu-miR-374; mmu-miR-183; mmu-miR-541; mmu-miR-369-3p; mmu-miR-340-5p; mmu-miR-741
5830418K08RIK	60.126	109	1.81286	mmu-miR-145; mmu-miR-495; mmu-miR-713; mmu-miR-804; mmu-miR-96; mmu-miR-431; mmu-miR-466g; mmu-miR-467c; mmu-miR-19a; mmu-miR-340-5p; mmu-miR-30d; mmu-miR-466b-3p; mmu-miR-28; mmu-miR-30a; mmu-miR-323-3p; mmu-miR-434-3p; mmu-miR-290-3p; mmu-let-7a; mmu-miR-669f-3p; mmu-miR-541; mmu-miR-468; mmu-miR-202-3p; mmu-miR-292-3p; mmu-miR-381; mmu-miR-672; mmu-miR-302a; mmu-miR-669a-3p; mmu-miR-466a-3p; m…
5830454E08RIK	0.727	5	6.87758	mmu-miR-330; mmu-miR-124; mmu-miR-150; mmu-miR-1952; mmu-miR-672
5930403N24RIK	2.488	29	11.6559	mmu-miR-200a; mmu-miR-433; mmu-miR-495; mmu-miR-466g; mmu-miR-150; mmu-miR-720; mmu-miR-467f; mmu-miR-30d; mmu-miR-30a; mmu-miR-323-3p; mmu-miR-377; mmu-miR-741; mmu-miR-434-3p; mmu-miR-141; mmu-miR-335-3p; mmu-miR-760-3p; mmu-miR-22; mmu-miR-382; mmu-miR-30b; mmu-miR-423-3p; mmu-miR-541; mmu-miR-376b; mmu-miR-103; mmu-miR-182; mmu-miR-468; mmu-miR-329; mmu-miR-26b; mmu-miR-26a; mmu-miR-410
6030419C18RIK	0.778	9	11.5681	mmu-miR-330; mmu-miR-433; mmu-miR-145; mmu-miR-713; mmu-miR-27a; mmu-miR-674; mmu-miR-1952; mmu-miR-762; mmu-miR-423-5p
6030445D17RIK	1.728	22	12.7315	mmu-miR-124; mmu-miR-297c; mmu-miR-467e; mmu-miR-429; mmu-miR-136; mmu-miR-96; mmu-miR-200b; mmu-miR-669d; mmu-miR-484; mmu-miR-296-5p; mmu-miR-377; mmu-miR-330; mmu-miR-1893; mmu-miR-27a; mmu-miR-467h; mmu-miR-182; mmu-miR-468; mmu-miR-329; mmu-miR-200c; mmu-miR-1952; mmu-miR-297a; mmu-miR-466f
6030458C11RIK	2.668	77	28.8606	mmu-miR-495; mmu-miR-335-5p; mmu-miR-713; mmu-miR-804; mmu-miR-93; mmu-miR-466g; mmu-miR-20a; mmu-miR-340-5p; mmu-miR-296-5p; mmu-miR-30d; mmu-miR-466b-3p; mmu-miR-30a; mmu-miR-290-3p; mmu-miR-155; mmu-miR-669f-3p; mmu-let-7a; mmu-miR-191; mmu-miR-106a; mmu-miR-17; mmu-miR-292-3p; mmu-miR-381; mmu-miR-672; mmu-miR-302a; mmu-miR-466a-3p; mmu-miR-302d; mmu-let-7g; mmu-miR-195; mmu-miR-124; mmu-miR-…
6330403A02RIK	5.977	68	11.3769	mmu-miR-495; mmu-miR-335-5p; mmu-miR-713; mmu-miR-96; mmu-miR-431; mmu-miR-340-5p; mmu-miR-296-5p; mmu-miR-28; mmu-miR-21; mmu-miR-29c; mmu-let-7a; mmu-miR-541; mmu-miR-129-2-3p; mmu-miR-202-3p; mmu-miR-129-1-3p; mmu-let-7g; mmu-miR-433; mmu-miR-148b; mmu-miR-669l; mmu-miR-125a-5p; mmu-miR-760-5p; mmu-miR-148a; mmu-miR-669f-5p; mmu-miR-125b-5p; mmu-miR-34c; mmu-miR-152; mmu-miR-134; mmu-miR-22; m…
6330416G13RIK	5.168	50	9.67492	mmu-miR-200a; mmu-miR-495; mmu-miR-335-5p; mmu-miR-93; mmu-miR-674; mmu-miR-20a; mmu-miR-467f; mmu-miR-340-5p; mmu-miR-28; mmu-let-7a; mmu-miR-1893; mmu-miR-27a; mmu-miR-541; mmu-miR-468; mmu-miR-106a; mmu-miR-103; mmu-miR-17; mmu-miR-202-3p; mmu-miR-154; mmu-miR-381; mmu-miR-672; mmu-miR-466a-3p; mmu-let-7g; mmu-miR-195; mmu-miR-350; mmu-miR-124; mmu-miR-136; mmu-miR-872; mmu-miR-374; mmu-miR-12…
6430531B16RIK	1.84	36	19.5652	mmu-miR-145; mmu-miR-713; mmu-miR-431; mmu-miR-19a; mmu-miR-674; mmu-miR-28; mmu-miR-205; mmu-miR-132; mmu-miR-103; mmu-miR-129-2-3p; mmu-miR-202-3p; mmu-miR-421; mmu-miR-154; mmu-miR-1952; mmu-miR-129-1-3p; mmu-miR-302a; mmu-miR-19b; mmu-miR-302d; mmu-miR-148b; mmu-miR-1960; mmu-miR-350; mmu-miR-125a-5p; mmu-miR-760-5p; mmu-miR-148a; mmu-miR-295; mmu-miR-125b-5p; mmu-miR-762; mmu-miR-376c; mmu-m…
6430571L13RIK	1.739	39	22.4267	mmu-miR-145; mmu-miR-713; mmu-miR-150; mmu-miR-674; mmu-miR-466b-3p; mmu-miR-30d; mmu-miR-296-5p; mmu-miR-291a-5p; mmu-miR-30a; mmu-miR-181a; mmu-miR-155; mmu-miR-291b-5p; mmu-let-7a; mmu-miR-30b; mmu-miR-103; mmu-miR-129-2-3p; mmu-miR-129-1-3p; mmu-miR-302a; mmu-let-7g; mmu-miR-195; mmu-miR-302d; mmu-miR-125a-5p; mmu-miR-16; mmu-miR-295; mmu-miR-125b-5p; mmu-let-7c; mmu-miR-377; mmu-miR-466c-3p;…
6430573F11RIK	12.101	64	5.28882	mmu-miR-145; mmu-miR-495; mmu-miR-93; mmu-miR-96; mmu-miR-20a; mmu-miR-28; mmu-miR-367; mmu-miR-106a; mmu-miR-468; mmu-miR-17; mmu-miR-381; mmu-miR-302a; mmu-miR-302d; mmu-miR-195; mmu-miR-136; mmu-miR-20b; mmu-miR-295; mmu-miR-720; mmu-miR-1196; mmu-miR-330; mmu-miR-335-3p; mmu-miR-134; mmu-miR-15a; mmu-miR-329; mmu-miR-1224; mmu-miR-200c; mmu-miR-410; mmu-miR-200a; mmu-miR-130a; mmu-miR-200b; m…
6820408C15RIK	1.521	35	23.0112	mmu-miR-200a; mmu-miR-93; mmu-miR-96; mmu-miR-431; mmu-miR-20a; mmu-miR-340-5p; mmu-miR-290-3p; mmu-let-7a; mmu-miR-669o-3p; mmu-miR-467a; mmu-miR-106a; mmu-miR-1983; mmu-miR-17; mmu-miR-26b; mmu-miR-202-3p; mmu-miR-1952; mmu-miR-292-3p; mmu-miR-421; mmu-miR-423-5p; mmu-let-7g; mmu-miR-195; mmu-miR-669a-3p; mmu-miR-16; mmu-miR-20b; mmu-miR-720; mmu-let-7c; mmu-miR-141; mmu-miR-330; mmu-miR-15a; m…
8030462N17RIK	3.955	73	18.4576	mmu-miR-145; mmu-miR-495; mmu-miR-713; mmu-miR-804; mmu-miR-93; mmu-miR-431; mmu-miR-466g; mmu-miR-19a; mmu-miR-20a; mmu-miR-290-3p; mmu-miR-669f-3p; mmu-miR-367; mmu-miR-191; mmu-miR-468; mmu-miR-106a; mmu-miR-17; mmu-miR-292-3p; mmu-miR-466a-3p; mmu-miR-124; mmu-miR-148b; mmu-miR-669l; mmu-miR-125a-5p; mmu-miR-760-5p; mmu-miR-148a; mmu-miR-669f-5p; mmu-miR-20b; mmu-miR-125b-5p; mmu-miR-23b; mmu…
8030474K03RIK	1.656	5	3.01932	mmu-miR-19a; mmu-miR-350; mmu-miR-674; mmu-miR-292-5p; mmu-miR-19b
8430419L09RIK	2.456	38	15.4723	mmu-miR-200a; mmu-miR-495; mmu-miR-335-5p; mmu-miR-96; mmu-miR-340-5p; mmu-miR-291a-5p; mmu-miR-291b-5p; mmu-miR-669o-3p; mmu-miR-191; mmu-miR-468; mmu-miR-672; mmu-miR-421; mmu-miR-302a; mmu-miR-302d; mmu-miR-669a-3p; mmu-miR-124; mmu-miR-136; mmu-miR-125a-5p; mmu-miR-760-5p; mmu-miR-669d; mmu-miR-484; mmu-miR-295; mmu-miR-125b-5p; mmu-miR-23b; mmu-miR-762; mmu-miR-376c; mmu-miR-101b; mmu-miR-37…
8430427H17RIK	10.579	96	9.07458	mmu-miR-145; mmu-miR-335-5p; mmu-miR-713; mmu-miR-93; mmu-miR-96; mmu-miR-431; mmu-miR-466g; mmu-miR-467c; mmu-miR-20a; mmu-miR-30d; mmu-miR-28; mmu-miR-30a; mmu-miR-21; mmu-miR-29c; mmu-miR-290-3p; mmu-let-7a; mmu-miR-669f-3p; mmu-miR-367; mmu-miR-106a; mmu-miR-468; mmu-miR-17; mmu-miR-202-3p; mmu-miR-292-3p; mmu-miR-672; mmu-miR-302a; mmu-miR-302d; mmu-let-7g; mmu-miR-195; mmu-miR-148b; mmu-miR…
8430432A02RIK	1.248	15	12.0192	mmu-miR-1945; mmu-miR-21; mmu-miR-330; mmu-miR-205; mmu-miR-713; mmu-miR-804; mmu-miR-27a; mmu-miR-382; mmu-miR-96; mmu-miR-182; mmu-miR-376b; mmu-miR-1952; mmu-miR-142-5p; mmu-miR-340-5p; mmu-miR-421
9030612E09RIK	1.859	18	9.68263	mmu-miR-466a-3p; mmu-miR-150; mmu-miR-720; mmu-miR-23b; mmu-miR-466b-3p; mmu-miR-101b; mmu-miR-466c-3p; mmu-miR-181a; mmu-miR-330; mmu-miR-335-3p; mmu-miR-760-3p; mmu-miR-132; mmu-miR-1893; mmu-miR-103; mmu-miR-1952; mmu-miR-1935; mmu-miR-23a; mmu-miR-410
9030624J02RIK	1.176	2	1.70068	mmu-miR-495; mmu-miR-335-5p
9130008F23RIK	2.952	34	11.5176	mmu-miR-200a; mmu-miR-495; mmu-miR-804; mmu-miR-340-5p; mmu-miR-296-5p; mmu-miR-21; mmu-miR-205; mmu-let-7a; mmu-miR-34a; mmu-miR-27a; mmu-miR-1198-5p; mmu-miR-468; mmu-miR-1983; mmu-let-7g; mmu-miR-466a-3p; mmu-miR-433; mmu-miR-297c; mmu-miR-136; mmu-miR-1198-3p; mmu-miR-484; mmu-miR-720; mmu-miR-762; mmu-let-7c; mmu-miR-741; mmu-miR-141; mmu-miR-1196; mmu-miR-330; mmu-miR-34c; mmu-miR-134; mmu-…
9130011E15RIK	1.616	28	17.3267	mmu-miR-195; mmu-miR-124; mmu-miR-145; mmu-miR-148b; mmu-miR-29b; mmu-miR-16; mmu-miR-148a; mmu-miR-674; mmu-miR-762; mmu-miR-30d; mmu-miR-28; mmu-miR-30a; mmu-miR-377; mmu-miR-152; mmu-miR-669o-5p; mmu-miR-34c; mmu-miR-330; mmu-miR-29c; mmu-miR-29a; mmu-miR-205; mmu-miR-760-3p; mmu-miR-34a; mmu-miR-15a; mmu-miR-382; mmu-miR-30b; mmu-miR-672; mmu-miR-15b; mmu-miR-423-5p
9130019O22RIK	6.742	44	6.52625	mmu-miR-145; mmu-miR-713; mmu-miR-804; mmu-miR-93; mmu-miR-130a; mmu-miR-431; mmu-miR-130b; mmu-miR-674; mmu-miR-20a; mmu-miR-669o-5p; mmu-miR-155; mmu-miR-669o-3p; mmu-miR-106a; mmu-miR-103; mmu-miR-1983; mmu-miR-17; mmu-miR-381; mmu-miR-302a; mmu-miR-669a-3p; mmu-miR-195; mmu-miR-302d; mmu-miR-124; mmu-miR-350; mmu-miR-136; mmu-miR-16; mmu-miR-484; mmu-miR-20b; mmu-miR-295; mmu-miR-762; mmu-miR…
9130023H24RIK	3.581	48	13.4041	mmu-miR-29b; mmu-miR-713; mmu-miR-804; mmu-miR-466g; mmu-miR-19a; mmu-miR-28; mmu-miR-181a; mmu-miR-29c; mmu-miR-205; mmu-miR-155; mmu-let-7a; mmu-miR-669o-3p; mmu-miR-126-3p; mmu-miR-27a; mmu-miR-191; mmu-miR-1983; mmu-miR-202-3p; mmu-miR-1952; mmu-miR-19b; mmu-miR-423-5p; mmu-miR-669a-3p; mmu-let-7g; mmu-miR-433; mmu-miR-297c; mmu-miR-350; mmu-miR-669l; mmu-miR-136; mmu-miR-669d; mmu-miR-669f-5…
9130213A22RIK	1.531	22	14.3697	mmu-miR-145; mmu-miR-495; mmu-miR-93; mmu-miR-20b; mmu-miR-674; mmu-miR-20a; mmu-miR-467f; mmu-miR-340-5p; mmu-miR-741; mmu-miR-1196; mmu-miR-290-3p; mmu-miR-1893; mmu-miR-467a; mmu-miR-106b; mmu-miR-106a; mmu-miR-1983; mmu-miR-129-2-3p; mmu-miR-17; mmu-miR-33; mmu-miR-292-3p; mmu-miR-142-5p; mmu-miR-129-1-3p
9130230L23RIK	6.904	71	10.2839	mmu-miR-495; mmu-miR-335-5p; mmu-miR-713; mmu-miR-431; mmu-miR-467c; mmu-miR-340-5p; mmu-miR-28; mmu-miR-434-3p; mmu-miR-290-3p; mmu-miR-669f-3p; mmu-let-7a; mmu-miR-468; mmu-miR-672; mmu-miR-381; mmu-miR-292-3p; mmu-miR-302a; mmu-miR-466a-3p; mmu-miR-302d; mmu-let-7g; mmu-miR-433; mmu-miR-148b; mmu-miR-136; mmu-miR-125a-5p; mmu-miR-148a; mmu-miR-295; mmu-miR-125b-5p; mmu-miR-1196; mmu-miR-330; m…
9130401M01RIK	0.288	12	41.6667	mmu-miR-32; mmu-miR-34c; mmu-miR-367; mmu-miR-34a; mmu-miR-30b; mmu-miR-25; mmu-miR-363-3p; mmu-miR-1983; mmu-miR-340-5p; mmu-miR-142-5p; mmu-miR-30d; mmu-miR-30a
9230110C19RIK	2.083	36	17.2828	mmu-miR-467e; mmu-miR-495; mmu-miR-335-5p; mmu-miR-466g; mmu-miR-369-3p; mmu-miR-467f; mmu-miR-340-5p; mmu-miR-466b-3p; mmu-miR-296-5p; mmu-miR-434-3p; mmu-miR-669o-5p; mmu-miR-181a; mmu-miR-205; mmu-miR-27a; mmu-miR-191; mmu-miR-467h; mmu-miR-129-2-3p; mmu-miR-129-1-3p; mmu-miR-148b; mmu-miR-1960; mmu-miR-872; mmu-miR-374; mmu-miR-760-5p; mmu-miR-1198-3p; mmu-miR-148a; mmu-miR-23b; mmu-miR-466c-…
9330101J02RIK	8.162	65	7.96373	mmu-miR-145; mmu-miR-335-5p; mmu-miR-431; mmu-miR-466g; mmu-miR-19a; mmu-miR-296-5p; mmu-miR-367; mmu-let-7a; mmu-miR-468; mmu-miR-672; mmu-miR-154; mmu-miR-669a-3p; mmu-miR-466a-3p; mmu-let-7g; mmu-miR-195; mmu-miR-433; mmu-miR-124; mmu-miR-148b; mmu-miR-136; mmu-miR-760-5p; mmu-miR-148a; mmu-miR-720; mmu-miR-23b; mmu-miR-377; mmu-miR-330; mmu-miR-152; mmu-miR-1945; mmu-miR-335-3p; mmu-miR-22; m…
9330182L06RIK	17.953	96	5.3473	mmu-miR-495; mmu-miR-713; mmu-miR-93; mmu-miR-96; mmu-miR-466g; mmu-miR-19a; mmu-miR-20a; mmu-miR-340-5p; mmu-miR-30d; mmu-miR-466b-3p; mmu-miR-30a; mmu-miR-323-3p; mmu-miR-434-3p; mmu-miR-29c; mmu-miR-290-3p; mmu-miR-155; mmu-miR-669f-3p; mmu-miR-541; mmu-miR-106a; mmu-miR-129-2-3p; mmu-miR-17; mmu-miR-154; mmu-miR-292-3p; mmu-miR-381; mmu-miR-672; mmu-miR-129-1-3p; mmu-miR-302a; mmu-miR-466a-3p…
9430016H08RIK	2.298	52	22.6284	mmu-miR-145; mmu-miR-467e; mmu-miR-495; mmu-miR-335-5p; mmu-miR-93; mmu-miR-96; mmu-miR-369-3p; mmu-miR-20a; mmu-miR-467f; mmu-miR-30d; mmu-miR-466b-3p; mmu-miR-30a; mmu-miR-181a; mmu-miR-290-3p; mmu-miR-669f-3p; mmu-miR-543; mmu-miR-27a; mmu-miR-467a; mmu-miR-1198-5p; mmu-miR-30b; mmu-miR-467h; mmu-miR-1983; mmu-miR-106a; mmu-miR-468; mmu-miR-17; mmu-miR-129-2-3p; mmu-miR-202-3p; mmu-miR-292-3p;…
9430020K01RIK	2.643	57	21.5664	mmu-miR-29b; mmu-miR-495; mmu-miR-713; mmu-miR-130a; mmu-miR-96; mmu-miR-466g; mmu-miR-19a; mmu-miR-130b; mmu-miR-369-3p; mmu-miR-340-5p; mmu-miR-467f; mmu-miR-296-5p; mmu-miR-466b-3p; mmu-miR-323-3p; mmu-miR-434-3p; mmu-miR-181a; mmu-miR-205; mmu-miR-29c; mmu-miR-543; mmu-miR-669f-3p; mmu-miR-27a; mmu-miR-1198-5p; mmu-miR-541; mmu-miR-182; mmu-miR-1983; mmu-miR-26b; mmu-miR-1952; mmu-miR-154; mm…
9430023L20RIK	0.69	19	27.5362	mmu-let-7g; mmu-miR-148b; mmu-miR-1960; mmu-miR-130a; mmu-miR-148a; mmu-miR-130b; mmu-miR-720; mmu-let-7c; mmu-miR-101b; mmu-miR-28; mmu-miR-434-3p; mmu-miR-152; mmu-let-7a; mmu-miR-134; mmu-miR-22; mmu-miR-301a; mmu-let-7e; mmu-miR-26b; mmu-miR-26a
9430038I01RIK	2.805	15	5.34759	mmu-miR-434-3p; mmu-miR-466c-3p; mmu-miR-132; mmu-miR-126-3p; mmu-miR-713; mmu-miR-125a-5p; mmu-miR-193b; mmu-miR-466g; mmu-miR-674; mmu-miR-23b; mmu-miR-125b-5p; mmu-miR-376c; mmu-miR-466b-3p; mmu-miR-23a; mmu-miR-323-3p
9530068E07RIK	3.558	43	12.0854	mmu-miR-200a; mmu-miR-29b; mmu-miR-495; mmu-miR-713; mmu-miR-369-3p; mmu-miR-323-3p; mmu-miR-434-3p; mmu-miR-181a; mmu-miR-29c; mmu-miR-290-3p; mmu-miR-543; mmu-miR-367; mmu-miR-467a; mmu-miR-1198-5p; mmu-miR-1983; mmu-miR-292-3p; mmu-miR-302a; mmu-miR-195; mmu-miR-302d; mmu-miR-32; mmu-miR-125a-5p; mmu-miR-16; mmu-miR-484; mmu-miR-363-3p; mmu-miR-295; mmu-miR-125b-5p; mmu-miR-23b; mmu-miR-762; m…
9630033F20RIK	3.187	45	14.1199	mmu-miR-200a; mmu-miR-495; mmu-miR-335-5p; mmu-miR-713; mmu-miR-804; mmu-miR-200b; mmu-miR-466g; mmu-miR-19a; mmu-miR-340-5p; mmu-miR-296-5p; mmu-miR-291a-5p; mmu-miR-181a; mmu-miR-543; mmu-miR-291b-5p; mmu-miR-27a; mmu-miR-1198-5p; mmu-miR-541; mmu-miR-154; mmu-miR-381; mmu-miR-421; mmu-miR-672; mmu-miR-19b; mmu-miR-195; mmu-miR-148b; mmu-miR-1960; mmu-miR-297c; mmu-miR-429; mmu-miR-136; mmu-miR…
9830147E19RIK	4.868	48	9.86031	mmu-miR-29b; mmu-miR-96; mmu-miR-200b; mmu-miR-19a; mmu-miR-369-3p; mmu-miR-340-5p; mmu-miR-466b-3p; mmu-miR-434-3p; mmu-miR-181a; mmu-miR-29c; mmu-miR-205; mmu-miR-34a; mmu-miR-27a; mmu-miR-1198-5p; mmu-miR-541; mmu-miR-468; mmu-miR-182; mmu-miR-1952; mmu-miR-19b; mmu-miR-433; mmu-miR-297c; mmu-miR-350; mmu-miR-669l; mmu-miR-429; mmu-miR-136; mmu-miR-374; mmu-miR-669f-5p; mmu-miR-18b; mmu-miR-23…
9930012K11RIK	5.401	35	6.48028	mmu-miR-145; mmu-miR-29b; mmu-miR-340-5p; mmu-miR-21; mmu-miR-29c; mmu-let-7a; mmu-miR-34a; mmu-miR-1198-5p; mmu-miR-1983; mmu-miR-202-3p; mmu-miR-423-5p; mmu-let-7g; mmu-miR-195; mmu-miR-124; mmu-miR-148b; mmu-miR-16; mmu-miR-760-5p; mmu-miR-148a; mmu-miR-18b; mmu-miR-23b; mmu-miR-762; mmu-let-7c; mmu-miR-377; mmu-miR-741; mmu-miR-152; mmu-miR-330; mmu-miR-34c; mmu-miR-29a; mmu-miR-22; mmu-miR-1…
9930013L23RIK	14.516	99	6.82006	mmu-miR-145; mmu-miR-495; mmu-miR-335-5p; mmu-miR-713; mmu-miR-93; mmu-miR-96; mmu-miR-431; mmu-miR-19a; mmu-miR-20a; mmu-miR-296-5p; mmu-miR-30d; mmu-miR-466b-3p; mmu-miR-28; mmu-miR-30a; mmu-miR-434-3p; mmu-miR-29c; mmu-miR-541; mmu-miR-106a; mmu-miR-129-2-3p; mmu-miR-17; mmu-miR-672; mmu-miR-129-1-3p; mmu-miR-302a; mmu-miR-302d; mmu-miR-195; mmu-miR-433; mmu-miR-124; mmu-miR-148b; mmu-miR-669l…
9930021J03RIK	21.124	67	3.17175	mmu-miR-713; mmu-miR-96; mmu-miR-466g; mmu-miR-466b-3p; mmu-miR-30d; mmu-miR-323-3p; mmu-miR-30a; mmu-miR-28; mmu-miR-434-3p; mmu-miR-21; mmu-miR-155; mmu-miR-541; mmu-miR-202-3p; mmu-miR-381; mmu-miR-466a-3p; mmu-miR-195; mmu-miR-433; mmu-miR-669l; mmu-miR-136; mmu-miR-125a-5p; mmu-miR-1198-3p; mmu-miR-669f-5p; mmu-miR-720; mmu-miR-125b-5p; mmu-miR-23b; mmu-miR-377; mmu-miR-466c-3p; mmu-miR-1196…
A230046K03RIK	2.299	47	20.4437	mmu-miR-467e; mmu-miR-495; mmu-miR-713; mmu-miR-804; mmu-miR-93; mmu-miR-130a; mmu-miR-466g; mmu-miR-130b; mmu-miR-20a; mmu-miR-674; mmu-miR-369-3p; mmu-miR-340-5p; mmu-miR-30d; mmu-miR-291a-5p; mmu-miR-30a; mmu-miR-434-3p; mmu-miR-155; mmu-miR-132; mmu-miR-291b-5p; mmu-miR-34a; mmu-miR-27a; mmu-miR-30b; mmu-miR-467h; mmu-miR-541; mmu-miR-103; mmu-miR-106a; mmu-miR-17; mmu-miR-1952; mmu-miR-433; …
A230050P20RIK	0.766	12	15.6658	mmu-miR-302d; mmu-miR-205; mmu-miR-134; mmu-miR-423-3p; mmu-miR-760-5p; mmu-miR-103; mmu-miR-291a-3p; mmu-miR-295; mmu-miR-1224; mmu-miR-762; mmu-miR-302a; mmu-miR-294
A230065H16RIK	0.354	4	11.2994	mmu-miR-18b; mmu-miR-296-5p; mmu-miR-762; mmu-miR-532-5p
A330008L17RIK	3.025	63	20.8264	mmu-miR-335-5p; mmu-miR-804; mmu-miR-130a; mmu-miR-200b; mmu-miR-431; mmu-miR-466g; mmu-miR-130b; mmu-miR-340-5p; mmu-miR-30d; mmu-miR-466b-3p; mmu-miR-291a-5p; mmu-miR-30a; mmu-miR-155; mmu-let-7a; mmu-miR-543; mmu-miR-367; mmu-miR-291b-5p; mmu-miR-34a; mmu-miR-1198-5p; mmu-miR-30b; mmu-miR-103; mmu-miR-202-3p; mmu-miR-26b; mmu-miR-381; mmu-miR-466a-3p; mmu-miR-32; mmu-let-7g; mmu-miR-142-3p; mm…
A330017A19RIK	5.149	64	12.4296	mmu-miR-200a; mmu-miR-467e; mmu-miR-495; mmu-miR-804; mmu-miR-96; mmu-miR-674; mmu-miR-369-3p; mmu-miR-340-5p; mmu-miR-467f; mmu-miR-296-5p; mmu-miR-30d; mmu-miR-466b-3p; mmu-miR-291a-5p; mmu-miR-28; mmu-miR-30a; mmu-miR-434-3p; mmu-miR-155; mmu-miR-205; mmu-miR-132; mmu-miR-291b-5p; mmu-miR-367; mmu-miR-669f-3p; mmu-miR-669o-3p; mmu-miR-27a; mmu-miR-1198-5p; mmu-miR-30b; mmu-miR-467h; mmu-miR-19…
A330021E22RIK	10.088	90	8.92149	mmu-miR-145; mmu-miR-495; mmu-miR-335-5p; mmu-miR-713; mmu-miR-804; mmu-miR-93; mmu-miR-466g; mmu-miR-467c; mmu-miR-20a; mmu-miR-340-5p; mmu-miR-30d; mmu-miR-466b-3p; mmu-miR-28; mmu-miR-30a; mmu-miR-434-3p; mmu-miR-155; mmu-miR-290-3p; mmu-miR-29c; mmu-let-7a; mmu-miR-669f-3p; mmu-miR-541; mmu-miR-106a; mmu-miR-129-2-3p; mmu-miR-17; mmu-miR-202-3p; mmu-miR-292-3p; mmu-miR-381; mmu-miR-129-1-3p; …
A330050F15RIK	2.08	40	19.2308	mmu-miR-29b; mmu-miR-335-5p; mmu-miR-713; mmu-miR-804; mmu-miR-130a; mmu-miR-466g; mmu-miR-130b; mmu-miR-340-5p; mmu-miR-467f; mmu-miR-30d; mmu-miR-466b-3p; mmu-miR-30a; mmu-miR-434-3p; mmu-miR-29c; mmu-miR-290-3p; mmu-miR-467a; mmu-miR-30b; mmu-miR-1983; mmu-miR-182; mmu-miR-202-3p; mmu-miR-292-3p; mmu-miR-1952; mmu-miR-195; mmu-miR-466a-3p; mmu-miR-142-3p; mmu-miR-16; mmu-miR-484; mmu-miR-762; …
A430005L14RIK	1.77	13	7.34463	mmu-miR-291b-3p; mmu-miR-330; mmu-miR-350; mmu-miR-669f-3p; mmu-miR-760-3p; mmu-miR-96; mmu-miR-125a-5p; mmu-miR-760-5p; mmu-miR-484; mmu-miR-182; mmu-miR-125b-5p; mmu-miR-1935; mmu-miR-762
A430033K04RIK	2.79	56	20.0717	mmu-miR-200a; mmu-miR-467e; mmu-miR-804; mmu-miR-200b; mmu-miR-19a; mmu-miR-674; mmu-miR-466b-3p; mmu-miR-291a-5p; mmu-miR-21; mmu-miR-181a; mmu-miR-367; mmu-miR-291b-5p; mmu-let-7a; mmu-miR-34a; mmu-miR-1198-5p; mmu-miR-467h; mmu-miR-468; mmu-miR-1983; mmu-miR-202-3p; mmu-miR-19b; mmu-miR-466a-3p; mmu-let-7g; mmu-miR-195; mmu-miR-32; mmu-miR-297c; mmu-miR-429; mmu-miR-136; mmu-miR-125a-5p; mmu-m…
A4GALT	3.738	31	8.2932	mmu-miR-195; mmu-miR-200a; mmu-miR-124; mmu-miR-145; mmu-miR-804; mmu-miR-136; mmu-miR-125a-5p; mmu-miR-16; mmu-miR-760-5p; mmu-miR-669d; mmu-miR-125b-5p; mmu-miR-101b; mmu-miR-741; mmu-miR-141; mmu-miR-34c; mmu-miR-760-3p; mmu-miR-293; mmu-miR-34a; mmu-miR-15a; mmu-miR-1198-5p; mmu-miR-193b; mmu-miR-103; mmu-miR-468; mmu-miR-129-2-3p; mmu-miR-1224; mmu-miR-421; mmu-miR-1935; mmu-miR-129-1-3p; mm…
A530054K11RIK	7.282	68	9.33809	mmu-miR-145; mmu-miR-495; mmu-miR-335-5p; mmu-miR-804; mmu-miR-96; mmu-miR-431; mmu-miR-466g; mmu-miR-340-5p; mmu-miR-30d; mmu-miR-466b-3p; mmu-miR-30a; mmu-miR-323-3p; mmu-miR-434-3p; mmu-miR-29c; mmu-miR-541; mmu-miR-468; mmu-miR-381; mmu-miR-302a; mmu-miR-195; mmu-miR-302d; mmu-miR-433; mmu-miR-1198-3p; mmu-miR-295; mmu-miR-23b; mmu-miR-377; mmu-miR-466c-3p; mmu-miR-34c; mmu-miR-335-3p; mmu-mi…
A630007B06RIK	12.968	80	6.16903	mmu-miR-145; mmu-miR-495; mmu-miR-335-5p; mmu-miR-713; mmu-miR-804; mmu-miR-96; mmu-miR-431; mmu-miR-466g; mmu-miR-19a; mmu-miR-30d; mmu-miR-28; mmu-miR-30a; mmu-miR-323-3p; mmu-miR-434-3p; mmu-miR-29c; mmu-miR-155; mmu-miR-367; mmu-miR-468; mmu-miR-129-2-3p; mmu-miR-129-1-3p; mmu-miR-302a; mmu-miR-302d; mmu-miR-195; mmu-miR-1198-3p; mmu-miR-295; mmu-miR-720; mmu-miR-23b; mmu-miR-377; mmu-miR-119…
A730013G03RIK	1.551	19	12.2502	mmu-let-7g; mmu-miR-142-3p; mmu-miR-1960; mmu-miR-29b; mmu-miR-484; mmu-miR-720; mmu-miR-296-5p; mmu-let-7c; mmu-miR-34c; mmu-miR-29a; mmu-miR-29c; mmu-miR-760-3p; mmu-let-7a; mmu-miR-22; mmu-miR-34a; mmu-miR-378; mmu-let-7e; mmu-miR-1983; mmu-miR-292-5p
A730049H05RIK	0.216	4	18.5185	mmu-miR-1983; mmu-miR-376b; mmu-miR-335-3p; mmu-miR-674
A830005F24RIK	0.726	16	22.0386	mmu-miR-434-3p; mmu-miR-330; mmu-miR-1960; mmu-miR-22; mmu-miR-136; mmu-miR-30b; mmu-miR-183; mmu-miR-193b; mmu-miR-423-3p; mmu-miR-431; mmu-miR-674; mmu-miR-33; mmu-miR-296-5p; mmu-miR-30d; mmu-miR-292-5p; mmu-miR-30a
A830018L16RIK	17.145	94	5.48265	mmu-miR-495; mmu-miR-804; mmu-miR-93; mmu-miR-466g; mmu-miR-467c; mmu-miR-20a; mmu-miR-340-5p; mmu-miR-466b-3p; mmu-miR-30d; mmu-miR-30a; mmu-miR-323-3p; mmu-miR-434-3p; mmu-miR-290-3p; mmu-miR-155; mmu-let-7a; mmu-miR-669f-3p; mmu-miR-367; mmu-miR-106a; mmu-miR-468; mmu-miR-17; mmu-miR-202-3p; mmu-miR-154; mmu-miR-292-3p; mmu-miR-381; mmu-miR-302a; mmu-miR-669a-3p; mmu-miR-466a-3p; mmu-miR-302d;…
A830080D01RIK	2.175	22	10.1149	mmu-miR-466a-3p; mmu-miR-350; mmu-miR-429; mmu-miR-125a-5p; mmu-miR-200b; mmu-miR-374; mmu-miR-466g; mmu-miR-369-3p; mmu-miR-125b-5p; mmu-miR-340-5p; mmu-miR-466b-3p; mmu-miR-101b; mmu-miR-741; mmu-miR-466c-3p; mmu-miR-669f-3p; mmu-miR-182; mmu-miR-103; mmu-miR-329; mmu-miR-200c; mmu-miR-26b; mmu-miR-421; mmu-miR-26a
A830092H15RIK	1.229	17	13.8324	mmu-miR-145; mmu-miR-669l; mmu-miR-125a-5p; mmu-miR-669f-5p; mmu-miR-674; mmu-miR-125b-5p; mmu-miR-741; mmu-miR-330; mmu-miR-34c; mmu-miR-669o-5p; mmu-miR-205; mmu-miR-34a; mmu-miR-669a-5p; mmu-miR-376b; mmu-miR-26b; mmu-miR-1952; mmu-miR-26a
A930016O22RIK	3.626	40	11.0314	mmu-miR-145; mmu-miR-804; mmu-miR-296-5p; mmu-miR-291a-5p; mmu-miR-323-3p; mmu-miR-669o-5p; mmu-miR-181a; mmu-miR-205; mmu-miR-669f-3p; mmu-miR-543; mmu-miR-291b-5p; mmu-miR-1893; mmu-miR-1983; mmu-miR-26b; mmu-miR-202-3p; mmu-miR-381; mmu-miR-1952; mmu-miR-195; mmu-miR-466a-3p; mmu-miR-124; mmu-miR-136; mmu-miR-16; mmu-miR-760-5p; mmu-miR-669d; mmu-miR-151-5p; mmu-miR-377; mmu-miR-330; mmu-miR-3…
A930018M24RIK	0.768	16	20.8333	mmu-miR-34c; mmu-miR-29a; mmu-miR-29b; mmu-miR-29c; mmu-miR-335-3p; mmu-miR-760-3p; mmu-miR-34a; mmu-miR-96; mmu-miR-466g; mmu-miR-760-5p; mmu-miR-182; mmu-miR-103; mmu-miR-129-2-3p; mmu-miR-329; mmu-miR-369-3p; mmu-miR-129-1-3p
A930018P22RIK	0.261	5	19.1571	mmu-miR-297c; mmu-miR-335-3p; mmu-miR-132; mmu-miR-22; mmu-miR-297a
AA415398	10.381	59	5.68346	mmu-miR-200a; mmu-miR-200b; mmu-miR-431; mmu-miR-150; mmu-miR-674; mmu-miR-466b-3p; mmu-miR-291a-5p; mmu-miR-669o-5p; mmu-miR-543; mmu-miR-291b-5p; mmu-let-7a; mmu-miR-132; mmu-miR-34a; mmu-miR-27a; mmu-miR-541; mmu-miR-26b; mmu-miR-1952; mmu-miR-381; mmu-miR-672; mmu-miR-302a; mmu-miR-423-5p; mmu-miR-302d; mmu-let-7g; mmu-miR-195; mmu-miR-433; mmu-miR-350; mmu-miR-429; mmu-miR-125a-5p; mmu-miR-1…
AA474408	4.374	93	21.262	mmu-miR-145; mmu-miR-335-5p; mmu-miR-713; mmu-miR-804; mmu-miR-93; mmu-miR-431; mmu-miR-466g; mmu-miR-20a; mmu-miR-340-5p; mmu-miR-296-5p; mmu-miR-466b-3p; mmu-miR-28; mmu-miR-323-3p; mmu-miR-434-3p; mmu-miR-29c; mmu-miR-155; mmu-let-7a; mmu-miR-669f-3p; mmu-miR-541; mmu-miR-106a; mmu-miR-129-2-3p; mmu-miR-17; mmu-miR-202-3p; mmu-miR-154; mmu-miR-381; mmu-miR-129-1-3p; mmu-miR-302a; mmu-miR-669a-…
AA986860	2.473	33	13.3441	mmu-miR-145; mmu-miR-29b; mmu-miR-804; mmu-miR-96; mmu-miR-30d; mmu-miR-28; mmu-miR-30a; mmu-miR-29c; mmu-miR-205; mmu-miR-34a; mmu-miR-669o-3p; mmu-miR-30b; mmu-miR-541; mmu-miR-182; mmu-miR-1983; mmu-miR-468; mmu-miR-381; mmu-miR-672; mmu-miR-423-5p; mmu-miR-669a-3p; mmu-miR-125a-5p; mmu-miR-484; mmu-miR-125b-5p; mmu-miR-762; mmu-miR-376c; mmu-miR-741; mmu-miR-151-5p; mmu-miR-34c; mmu-miR-29a; …
AA987161	9.081	41	4.51492	mmu-miR-29b; mmu-miR-96; mmu-miR-431; mmu-miR-150; mmu-miR-369-3p; mmu-miR-340-5p; mmu-miR-466b-3p; mmu-miR-323-3p; mmu-miR-181a; mmu-miR-29c; mmu-miR-543; mmu-miR-132; mmu-miR-1198-5p; mmu-miR-191; mmu-miR-541; mmu-miR-468; mmu-miR-1983; mmu-miR-26b; mmu-miR-1952; mmu-miR-381; mmu-miR-466a-3p; mmu-miR-433; mmu-miR-297c; mmu-miR-669l; mmu-miR-374; mmu-miR-669d; mmu-miR-669f-5p; mmu-miR-23b; mmu-m…
AAAS	0.259	4	15.444	mmu-miR-433; mmu-miR-202-3p; mmu-miR-672; mmu-miR-423-5p
AACS	1.197	31	25.8981	mmu-miR-195; mmu-miR-200a; mmu-miR-29b; mmu-miR-669l; mmu-miR-93; mmu-miR-16; mmu-miR-669f-5p; mmu-miR-20b; mmu-miR-20a; mmu-miR-141; mmu-miR-29c; mmu-miR-29a; mmu-miR-290-3p; mmu-miR-205; mmu-miR-543; mmu-miR-132; mmu-miR-669a-5p; mmu-miR-15a; mmu-miR-378; mmu-miR-467a; mmu-miR-106b; mmu-miR-183; mmu-miR-541; mmu-miR-1983; mmu-miR-106a; mmu-miR-376b; mmu-miR-17; mmu-miR-26b; mmu-miR-292-3p; mmu-…
AADAT	0.455	21	46.1538	mmu-miR-433; mmu-miR-350; mmu-miR-713; mmu-miR-93; mmu-miR-96; mmu-miR-374; mmu-miR-20b; mmu-miR-20a; mmu-miR-674; mmu-miR-369-3p; mmu-miR-340-5p; mmu-miR-291a-5p; mmu-miR-330; mmu-miR-155; mmu-miR-205; mmu-miR-291b-5p; mmu-miR-106b; mmu-miR-106a; mmu-miR-182; mmu-miR-17; mmu-miR-142-5p
AAGAB	1.683	24	14.2602	mmu-miR-195; mmu-miR-200a; mmu-miR-148b; mmu-miR-1960; mmu-miR-16; mmu-miR-148a; mmu-miR-760-5p; mmu-miR-23b; mmu-miR-762; mmu-miR-296-5p; mmu-miR-101b; mmu-miR-141; mmu-miR-152; mmu-miR-181a; mmu-miR-22; mmu-miR-27a; mmu-miR-15a; mmu-miR-1983; mmu-miR-129-2-3p; mmu-miR-329; mmu-miR-1935; mmu-miR-129-1-3p; mmu-miR-15b; mmu-miR-23a
AAMP	0.946	5	5.28541	mmu-miR-330; mmu-miR-291b-5p; mmu-miR-378; mmu-miR-762; mmu-miR-291a-5p
AAR2	2.584	27	10.4489	mmu-miR-195; mmu-miR-466a-3p; mmu-miR-142-3p; mmu-miR-1960; mmu-miR-429; mmu-miR-96; mmu-miR-16; mmu-miR-200b; mmu-miR-484; mmu-miR-150; mmu-miR-674; mmu-miR-181a; mmu-miR-155; mmu-miR-760-3p; mmu-miR-132; mmu-miR-15a; mmu-miR-193b; mmu-miR-182; mmu-miR-1983; mmu-miR-129-2-3p; mmu-miR-1224; mmu-miR-200c; mmu-miR-1952; mmu-miR-381; mmu-miR-1935; mmu-miR-129-1-3p; mmu-miR-15b
AARD	0.923	17	18.4182	mmu-miR-124; mmu-miR-350; mmu-miR-495; mmu-miR-713; mmu-miR-1198-3p; mmu-miR-150; mmu-miR-720; mmu-miR-181a; mmu-miR-330; mmu-miR-155; mmu-miR-335-3p; mmu-miR-760-3p; mmu-miR-129-2-3p; mmu-miR-1952; mmu-miR-142-5p; mmu-miR-33; mmu-miR-129-1-3p
AARS	2.646	40	15.1172	mmu-miR-200a; mmu-miR-145; mmu-miR-713; mmu-miR-150; mmu-miR-434-3p; mmu-miR-669f-3p; mmu-miR-367; mmu-let-7a; mmu-miR-103; mmu-miR-129-2-3p; mmu-miR-202-3p; mmu-miR-672; mmu-miR-421; mmu-miR-1952; mmu-miR-154; mmu-miR-129-1-3p; mmu-let-7g; mmu-miR-195; mmu-miR-32; mmu-miR-1960; mmu-miR-872; mmu-miR-16; mmu-miR-1198-3p; mmu-miR-484; mmu-miR-363-3p; mmu-miR-23b; mmu-miR-762; mmu-let-7c; mmu-miR-48…
AARS2	0.557	18	32.316	mmu-let-7g; mmu-miR-302d; mmu-miR-433; mmu-miR-125a-5p; mmu-miR-674; mmu-miR-295; mmu-miR-23b; mmu-miR-125b-5p; mmu-let-7c; mmu-let-7a; mmu-miR-22; mmu-let-7e; mmu-miR-291a-3p; mmu-miR-672; mmu-miR-23a; mmu-miR-302a; mmu-miR-466f; mmu-miR-294
AARSD1	2.75	12	4.36364	mmu-miR-195; mmu-miR-15a; mmu-miR-378; mmu-miR-125a-5p; mmu-miR-16; mmu-miR-760-5p; mmu-miR-484; mmu-miR-674; mmu-miR-125b-5p; mmu-miR-1952; mmu-miR-296-5p; mmu-miR-15b
AASDH	14.135	78	5.51822	mmu-miR-145; mmu-miR-495; mmu-miR-96; mmu-miR-466b-3p; mmu-miR-30d; mmu-miR-30a; mmu-miR-28; mmu-miR-434-3p; mmu-miR-21; mmu-miR-29c; mmu-miR-669f-3p; mmu-let-7a; mmu-miR-202-3p; mmu-miR-672; mmu-miR-381; mmu-miR-302a; mmu-miR-302d; mmu-let-7g; mmu-miR-195; mmu-miR-148b; mmu-miR-136; mmu-miR-125a-5p; mmu-miR-760-5p; mmu-miR-148a; mmu-miR-295; mmu-miR-23b; mmu-miR-125b-5p; mmu-miR-377; mmu-miR-466…
AASDHPPT	2.047	24	11.7245	mmu-miR-669a-3p; mmu-miR-142-3p; mmu-miR-200a; mmu-miR-495; mmu-miR-335-5p; mmu-miR-374; mmu-miR-150; mmu-miR-467f; mmu-miR-101b; mmu-miR-434-3p; mmu-miR-141; mmu-miR-1945; mmu-miR-21; mmu-miR-330; mmu-miR-335-3p; mmu-miR-132; mmu-miR-22; mmu-miR-669o-3p; mmu-miR-183; mmu-miR-103; mmu-miR-468; mmu-miR-421; mmu-miR-381; mmu-miR-292-5p
AASS	2.27	39	17.1806	mmu-miR-145; mmu-miR-495; mmu-miR-335-5p; mmu-miR-96; mmu-miR-466g; mmu-miR-150; mmu-miR-466b-3p; mmu-miR-296-5p; mmu-miR-181a; mmu-miR-205; mmu-miR-132; mmu-miR-669o-3p; mmu-miR-34a; mmu-miR-541; mmu-miR-468; mmu-miR-182; mmu-miR-154; mmu-miR-421; mmu-miR-672; mmu-miR-466a-3p; mmu-miR-669a-3p; mmu-miR-124; mmu-miR-136; mmu-miR-872; mmu-miR-125a-5p; mmu-miR-669d; mmu-miR-125b-5p; mmu-miR-376c; mm…
AATF	2.859	33	11.5425	mmu-miR-302d; mmu-miR-433; mmu-miR-142-3p; mmu-miR-124; mmu-miR-467e; mmu-miR-335-5p; mmu-miR-713; mmu-miR-125a-5p; mmu-miR-760-5p; mmu-miR-431; mmu-miR-467c; mmu-miR-484; mmu-miR-150; mmu-miR-295; mmu-miR-125b-5p; mmu-miR-28; mmu-miR-291b-3p; mmu-miR-335-3p; mmu-miR-155; mmu-miR-205; mmu-miR-290-3p; mmu-miR-760-3p; mmu-miR-132; mmu-miR-376a; mmu-miR-467a; mmu-miR-27a; mmu-miR-467h; mmu-miR-182; …
AATK	19.919	69	3.46403	mmu-miR-713; mmu-miR-93; mmu-miR-96; mmu-miR-431; mmu-miR-466g; mmu-miR-20a; mmu-miR-296-5p; mmu-miR-434-3p; mmu-miR-29c; mmu-miR-290-3p; mmu-miR-367; mmu-let-7a; mmu-miR-1893; mmu-miR-106a; mmu-miR-17; mmu-miR-292-3p; mmu-let-7g; mmu-miR-195; mmu-miR-669l; mmu-miR-136; mmu-miR-760-5p; mmu-miR-669f-5p; mmu-miR-20b; mmu-miR-377; mmu-miR-34c; mmu-miR-330; mmu-miR-335-3p; mmu-miR-22; mmu-miR-15a; mm…
AB041803	1.116	24	21.5054	mmu-miR-466a-3p; mmu-miR-669a-3p; mmu-miR-148b; mmu-miR-297c; mmu-miR-467e; mmu-miR-713; mmu-miR-148a; mmu-miR-466g; mmu-miR-484; mmu-miR-150; mmu-miR-466b-3p; mmu-miR-291a-5p; mmu-miR-466c-3p; mmu-miR-152; mmu-miR-205; mmu-miR-669f-3p; mmu-miR-291b-5p; mmu-miR-669o-3p; mmu-miR-467h; mmu-miR-532-5p; mmu-miR-103; mmu-miR-468; mmu-miR-381; mmu-miR-297a
AB041806	1.715	24	13.9942	mmu-miR-302d; mmu-miR-713; mmu-miR-1198-3p; mmu-miR-150; mmu-miR-295; mmu-miR-762; mmu-miR-741; mmu-miR-101b; mmu-miR-181a; mmu-miR-330; mmu-miR-335-3p; mmu-miR-290-3p; mmu-miR-132; mmu-miR-1893; mmu-miR-467a; mmu-miR-378; mmu-miR-182; mmu-miR-291a-3p; mmu-miR-129-2-3p; mmu-miR-1224; mmu-miR-292-3p; mmu-miR-129-1-3p; mmu-miR-302a; mmu-miR-294
ABAT	6.128	42	6.85379	mmu-miR-200a; mmu-miR-495; mmu-miR-335-5p; mmu-miR-713; mmu-miR-96; mmu-miR-200b; mmu-miR-150; mmu-miR-369-3p; mmu-miR-340-5p; mmu-miR-30d; mmu-miR-30a; mmu-miR-434-3p; mmu-miR-367; mmu-miR-27a; mmu-miR-1198-5p; mmu-miR-30b; mmu-miR-103; mmu-miR-468; mmu-miR-421; mmu-miR-423-5p; mmu-miR-32; mmu-miR-433; mmu-miR-429; mmu-miR-125a-5p; mmu-miR-374; mmu-miR-760-5p; mmu-miR-363-3p; mmu-miR-125b-5p; mm…
ABCA1	4.223	84	19.8911	mmu-miR-145; mmu-miR-495; mmu-miR-713; mmu-miR-93; mmu-miR-96; mmu-miR-466g; mmu-miR-19a; mmu-miR-20a; mmu-miR-340-5p; mmu-miR-466b-3p; mmu-miR-669f-3p; mmu-miR-191; mmu-miR-468; mmu-miR-106a; mmu-miR-17; mmu-miR-154; mmu-miR-381; mmu-miR-672; mmu-miR-302a; mmu-miR-669a-3p; mmu-miR-466a-3p; mmu-miR-302d; mmu-miR-124; mmu-miR-148b; mmu-miR-136; mmu-miR-760-5p; mmu-miR-1198-3p; mmu-miR-148a; mmu-mi…
ABCA17	0.284	6	21.1268	mmu-miR-541; mmu-miR-155; mmu-miR-760-3p; mmu-miR-762; mmu-miR-423-5p; mmu-miR-466g
ABCA2	0.703	18	25.6046	mmu-miR-124; mmu-miR-495; mmu-miR-96; mmu-miR-125a-5p; mmu-miR-19a; mmu-miR-125b-5p; mmu-miR-762; mmu-miR-181a; mmu-miR-134; mmu-miR-669f-3p; mmu-miR-760-3p; mmu-miR-22; mmu-miR-182; mmu-miR-129-2-3p; mmu-miR-381; mmu-miR-129-1-3p; mmu-miR-423-5p; mmu-miR-19b
ABCA3	2.799	22	7.85995	mmu-miR-142-3p; mmu-miR-433; mmu-miR-124; mmu-miR-467e; mmu-miR-335-5p; mmu-miR-713; mmu-miR-125a-5p; mmu-miR-669d; mmu-miR-125b-5p; mmu-miR-30d; mmu-miR-376c; mmu-miR-30a; mmu-miR-330; mmu-miR-205; mmu-miR-335-3p; mmu-miR-22; mmu-miR-30b; mmu-miR-467h; mmu-miR-376b; mmu-miR-26b; mmu-miR-33; mmu-miR-26a
ABCA7	0.819	1	1.221	mmu-miR-1952
ABCB1A	1.216	33	27.1382	mmu-miR-200a; mmu-miR-145; mmu-miR-467e; mmu-miR-804; mmu-miR-130a; mmu-miR-130b; mmu-miR-674; mmu-miR-340-5p; mmu-miR-467f; mmu-miR-466b-3p; mmu-miR-291a-5p; mmu-miR-181a; mmu-miR-205; mmu-miR-291b-5p; mmu-miR-543; mmu-miR-669f-3p; mmu-miR-27a; mmu-miR-1198-5p; mmu-miR-467h; mmu-miR-541; mmu-miR-381; mmu-miR-466a-3p; mmu-miR-433; mmu-miR-142-3p; mmu-miR-136; mmu-miR-466c-3p; mmu-miR-141; mmu-miR…
ABCB1B	0.565	8	14.1593	mmu-miR-466a-3p; mmu-miR-129-2-3p; mmu-miR-29a; mmu-miR-29b; mmu-miR-29c; mmu-miR-467f; mmu-miR-129-1-3p; mmu-miR-374
ABCB4	0.257	2	7.7821	mmu-miR-1960; mmu-miR-293
ABCB6	7.906	52	6.57728	mmu-miR-29b; mmu-miR-467c; mmu-miR-674; mmu-miR-296-5p; mmu-miR-434-3p; mmu-miR-29c; mmu-miR-290-3p; mmu-miR-205; mmu-let-7a; mmu-miR-669o-3p; mmu-miR-34a; mmu-miR-467a; mmu-miR-27a; mmu-miR-1983; mmu-miR-103; mmu-miR-129-2-3p; mmu-miR-202-3p; mmu-miR-1952; mmu-miR-292-3p; mmu-miR-672; mmu-miR-129-1-3p; mmu-miR-302a; mmu-miR-669a-3p; mmu-miR-302d; mmu-let-7g; mmu-miR-195; mmu-miR-433; mmu-miR-142…
ABCB7	4.195	62	14.7795	mmu-miR-200a; mmu-miR-145; mmu-miR-467e; mmu-miR-495; mmu-miR-335-5p; mmu-miR-713; mmu-miR-130a; mmu-miR-200b; mmu-miR-431; mmu-miR-19a; mmu-miR-130b; mmu-miR-150; mmu-miR-369-3p; mmu-miR-30d; mmu-miR-291a-5p; mmu-miR-28; mmu-miR-30a; mmu-miR-323-3p; mmu-miR-434-3p; mmu-miR-181a; mmu-miR-21; mmu-miR-291b-5p; mmu-miR-543; mmu-miR-669f-3p; mmu-miR-1198-5p; mmu-miR-30b; mmu-miR-467h; mmu-miR-1983; m…
ABCB8	2.103	14	6.65716	mmu-miR-302d; mmu-miR-760-3p; mmu-miR-130a; mmu-miR-301a; mmu-miR-193b; mmu-miR-431; mmu-miR-484; mmu-miR-130b; mmu-miR-291a-3p; mmu-miR-150; mmu-miR-295; mmu-miR-302a; mmu-miR-294; mmu-miR-741
ABCB9	7.346	82	11.1625	mmu-miR-495; mmu-miR-713; mmu-miR-93; mmu-miR-19a; mmu-miR-20a; mmu-miR-30d; mmu-miR-296-5p; mmu-miR-30a; mmu-miR-28; mmu-miR-29c; mmu-let-7a; mmu-miR-541; mmu-miR-468; mmu-miR-106a; mmu-miR-17; mmu-miR-129-2-3p; mmu-miR-202-3p; mmu-miR-672; mmu-miR-129-1-3p; mmu-miR-302a; mmu-miR-302d; mmu-let-7g; mmu-miR-195; mmu-miR-433; mmu-miR-136; mmu-miR-20b; mmu-miR-295; mmu-miR-23b; mmu-miR-377; mmu-miR-…
ABCC1	16.674	70	4.19815	mmu-miR-145; mmu-miR-495; mmu-miR-713; mmu-miR-804; mmu-miR-93; mmu-miR-431; mmu-miR-466g; mmu-miR-20a; mmu-miR-296-5p; mmu-miR-28; mmu-miR-434-3p; mmu-let-7a; mmu-miR-468; mmu-miR-106a; mmu-miR-17; mmu-miR-129-2-3p; mmu-miR-154; mmu-miR-672; mmu-miR-129-1-3p; mmu-miR-669a-3p; mmu-miR-466a-3p; mmu-let-7g; mmu-miR-195; mmu-miR-148b; mmu-miR-136; mmu-miR-125a-5p; mmu-miR-148a; mmu-miR-20b; mmu-miR-…
ABCC10	6.444	58	9.00062	mmu-miR-145; mmu-miR-29b; mmu-miR-713; mmu-miR-130a; mmu-miR-431; mmu-miR-466g; mmu-miR-130b; mmu-miR-674; mmu-miR-296-5p; mmu-miR-30d; mmu-miR-291a-5p; mmu-miR-28; mmu-miR-30a; mmu-miR-29c; mmu-miR-132; mmu-miR-291b-5p; mmu-let-7a; mmu-miR-34a; mmu-miR-27a; mmu-miR-30b; mmu-miR-103; mmu-miR-182; mmu-miR-129-2-3p; mmu-miR-202-3p; mmu-miR-421; mmu-miR-129-1-3p; mmu-miR-423-5p; mmu-let-7g; mmu-miR-…
ABCC3	5.206	29	5.5705	mmu-miR-29b; mmu-miR-350; mmu-miR-669l; mmu-miR-136; mmu-miR-374; mmu-miR-760-5p; mmu-miR-669f-5p; mmu-miR-150; mmu-miR-369-3p; mmu-miR-18b; mmu-miR-720; mmu-miR-296-5p; mmu-miR-377; mmu-miR-434-3p; mmu-miR-330; mmu-miR-29c; mmu-miR-29a; mmu-miR-127; mmu-miR-760-3p; mmu-miR-22; mmu-miR-669a-5p; mmu-miR-191; mmu-miR-183; mmu-miR-103; mmu-miR-1983; mmu-miR-329; mmu-miR-381; mmu-miR-672; mmu-miR-423…
ABCC4	3.504	45	12.8425	mmu-miR-130a; mmu-miR-466g; mmu-miR-130b; mmu-miR-150; mmu-miR-467f; mmu-miR-340-5p; mmu-miR-30d; mmu-miR-28; mmu-miR-30a; mmu-miR-434-3p; mmu-miR-21; mmu-miR-181a; mmu-miR-669f-3p; mmu-miR-132; mmu-miR-669o-3p; mmu-miR-27a; mmu-miR-30b; mmu-miR-129-2-3p; mmu-miR-26b; mmu-miR-381; mmu-miR-129-1-3p; mmu-miR-669a-3p; mmu-miR-195; mmu-miR-124; mmu-miR-297c; mmu-miR-669l; mmu-miR-125a-5p; mmu-miR-16;…
ABCC5	37.086	112	3.02001	mmu-miR-145; mmu-miR-495; mmu-miR-335-5p; mmu-miR-713; mmu-miR-93; mmu-miR-96; mmu-miR-431; mmu-miR-466g; mmu-miR-19a; mmu-miR-20a; mmu-miR-340-5p; mmu-miR-296-5p; mmu-miR-28; mmu-miR-323-3p; mmu-miR-21; mmu-miR-29c; mmu-let-7a; mmu-miR-367; mmu-miR-106a; mmu-miR-468; mmu-miR-129-2-3p; mmu-miR-17; mmu-miR-202-3p; mmu-miR-154; mmu-miR-672; mmu-miR-129-1-3p; mmu-miR-302a; mmu-miR-669a-3p; mmu-miR-3…
ABCC6	2.384	28	11.745	mmu-miR-124; mmu-miR-1960; mmu-miR-713; mmu-miR-804; mmu-miR-484; mmu-miR-150; mmu-miR-18b; mmu-miR-296-5p; mmu-miR-762; mmu-miR-30d; mmu-miR-28; mmu-miR-30a; mmu-miR-1196; mmu-miR-330; mmu-miR-134; mmu-miR-378; mmu-miR-27a; mmu-miR-30b; mmu-miR-1983; mmu-miR-103; mmu-miR-376b; mmu-miR-202-3p; mmu-miR-1952; mmu-miR-421; mmu-miR-672; mmu-miR-1935; mmu-miR-292-5p; mmu-miR-423-5p
ABCC8	0.239	2	8.3682	mmu-miR-1935; mmu-miR-101b
ABCD1	1.223	18	14.7179	mmu-miR-124; mmu-miR-713; mmu-miR-96; mmu-miR-484; mmu-miR-674; mmu-miR-762; mmu-miR-296-5p; mmu-miR-377; mmu-miR-28; mmu-miR-34c; mmu-miR-205; mmu-miR-335-3p; mmu-miR-34a; mmu-miR-182; mmu-miR-103; mmu-miR-1935; mmu-miR-292-5p; mmu-miR-423-5p
ABCD2	3.322	57	17.1583	mmu-miR-335-5p; mmu-miR-713; mmu-miR-804; mmu-miR-93; mmu-miR-20a; mmu-miR-466b-3p; mmu-miR-30d; mmu-miR-291a-5p; mmu-miR-30a; mmu-miR-669o-5p; mmu-miR-21; mmu-miR-669f-3p; mmu-miR-367; mmu-miR-291b-5p; mmu-miR-132; mmu-miR-30b; mmu-miR-106a; mmu-miR-1983; mmu-miR-17; mmu-miR-129-2-3p; mmu-miR-26b; mmu-miR-154; mmu-miR-129-1-3p; mmu-miR-302a; mmu-miR-466a-3p; mmu-miR-32; mmu-miR-302d; mmu-miR-297…
ABCD3	3.653	36	9.85491	mmu-miR-200a; mmu-miR-804; mmu-miR-431; mmu-miR-150; mmu-miR-467f; mmu-miR-669o-5p; mmu-miR-205; mmu-miR-669f-3p; mmu-miR-543; mmu-miR-132; mmu-miR-1893; mmu-miR-27a; mmu-miR-26b; mmu-miR-381; mmu-miR-154; mmu-miR-195; mmu-miR-433; mmu-miR-148b; mmu-miR-1960; mmu-miR-350; mmu-miR-872; mmu-miR-16; mmu-miR-1198-3p; mmu-miR-148a; mmu-miR-720; mmu-miR-377; mmu-miR-141; mmu-miR-152; mmu-miR-760-3p; mm…
ABCD4	0.629	16	25.4372	mmu-miR-195; mmu-miR-302d; mmu-miR-145; mmu-miR-205; mmu-miR-335-3p; mmu-miR-15a; mmu-miR-16; mmu-miR-150; mmu-miR-129-2-3p; mmu-miR-291a-3p; mmu-miR-295; mmu-miR-340-5p; mmu-miR-129-1-3p; mmu-miR-15b; mmu-miR-302a; mmu-miR-294
ABCE1	1.836	38	20.6972	mmu-miR-145; mmu-miR-29b; mmu-miR-495; mmu-miR-713; mmu-miR-96; mmu-miR-369-3p; mmu-miR-340-5p; mmu-miR-323-3p; mmu-miR-29c; mmu-miR-669f-3p; mmu-miR-543; mmu-miR-669o-3p; mmu-miR-541; mmu-miR-182; mmu-miR-103; mmu-miR-129-2-3p; mmu-miR-381; mmu-miR-421; mmu-miR-129-1-3p; mmu-miR-669a-3p; mmu-miR-466a-3p; mmu-miR-350; mmu-miR-136; mmu-miR-374; mmu-miR-18b; mmu-miR-23b; mmu-miR-762; mmu-miR-376c; …
ABCF1	4.929	33	6.69507	mmu-miR-291a-5p; mmu-miR-28; mmu-miR-205; mmu-miR-543; mmu-miR-291b-5p; mmu-miR-132; mmu-miR-34a; mmu-miR-27a; mmu-miR-541; mmu-miR-103; mmu-miR-129-2-3p; mmu-miR-26b; mmu-miR-672; mmu-miR-1952; mmu-miR-129-1-3p; mmu-miR-423-5p; mmu-miR-195; mmu-miR-142-3p; mmu-miR-125a-5p; mmu-miR-16; mmu-miR-484; mmu-miR-125b-5p; mmu-miR-720; mmu-miR-762; mmu-miR-377; mmu-miR-330; mmu-miR-34c; mmu-miR-760-3p; m…
ABCF2	0.663	20	30.1659	mmu-miR-32; mmu-miR-148b; mmu-miR-429; mmu-miR-200b; mmu-miR-148a; mmu-miR-19a; mmu-miR-363-3p; mmu-miR-296-5p; mmu-miR-762; mmu-miR-376c; mmu-miR-377; mmu-miR-152; mmu-miR-34c; mmu-miR-367; mmu-miR-34a; mmu-miR-25; mmu-miR-103; mmu-miR-200c; mmu-miR-19b; mmu-miR-423-5p
ABCF3	1.197	29	24.2272	mmu-miR-195; mmu-miR-302d; mmu-miR-145; mmu-miR-29b; mmu-miR-136; mmu-miR-16; mmu-miR-669d; mmu-miR-484; mmu-miR-150; mmu-miR-295; mmu-miR-296-5p; mmu-miR-377; mmu-miR-741; mmu-miR-34c; mmu-miR-29a; mmu-miR-205; mmu-miR-29c; mmu-miR-155; mmu-miR-34a; mmu-miR-27a; mmu-miR-15a; mmu-miR-378; mmu-miR-382; mmu-miR-468; mmu-miR-291a-3p; mmu-miR-329; mmu-miR-15b; mmu-miR-302a; mmu-miR-294
ABCG1	1.721	25	14.5264	mmu-let-7g; mmu-miR-200a; mmu-miR-433; mmu-miR-148b; mmu-miR-130a; mmu-miR-148a; mmu-miR-760-5p; mmu-miR-130b; mmu-miR-484; mmu-miR-340-5p; mmu-let-7c; mmu-miR-141; mmu-miR-330; mmu-miR-152; mmu-let-7a; mmu-miR-378; mmu-miR-301a; mmu-miR-183; mmu-miR-423-3p; mmu-let-7e; mmu-miR-1224; mmu-miR-1952; mmu-miR-142-5p; mmu-miR-33; mmu-miR-1935
ABCG3	3.124	23	7.36236	mmu-miR-466a-3p; mmu-miR-433; mmu-miR-350; mmu-miR-429; mmu-miR-804; mmu-miR-200b; mmu-miR-374; mmu-miR-466g; mmu-miR-150; mmu-miR-101b; mmu-miR-377; mmu-miR-741; mmu-miR-155; mmu-miR-335-3p; mmu-miR-760-3p; mmu-miR-669f-3p; mmu-miR-22; mmu-miR-27a; mmu-miR-468; mmu-miR-200c; mmu-miR-26b; mmu-miR-421; mmu-miR-26a
ABCG8	2.016	13	6.44841	mmu-let-7g; mmu-let-7a; mmu-miR-132; mmu-miR-713; mmu-miR-99b; mmu-miR-183; mmu-let-7e; mmu-miR-103; mmu-miR-150; mmu-miR-202-3p; mmu-let-7c; mmu-miR-410; mmu-miR-741
ABHD10	5.648	52	9.2068	mmu-miR-467e; mmu-miR-713; mmu-miR-93; mmu-miR-200b; mmu-miR-466g; mmu-miR-19a; mmu-miR-20a; mmu-miR-340-5p; mmu-miR-466b-3p; mmu-miR-28; mmu-miR-205; mmu-miR-155; mmu-miR-367; mmu-let-7a; mmu-miR-467h; mmu-miR-103; mmu-miR-468; mmu-miR-106a; mmu-miR-17; mmu-miR-202-3p; mmu-miR-26b; mmu-miR-421; mmu-miR-19b; mmu-miR-423-5p; mmu-miR-32; mmu-let-7g; mmu-miR-297c; mmu-miR-124; mmu-miR-429; mmu-miR-1…
ABHD11	0.578	4	6.92042	mmu-miR-125b-5p; mmu-miR-125a-5p; mmu-miR-183; mmu-miR-28
ABHD12	5.485	31	5.65178	mmu-let-7g; mmu-miR-148b; mmu-miR-1960; mmu-miR-29b; mmu-miR-713; mmu-miR-148a; mmu-miR-484; mmu-miR-674; mmu-miR-467f; mmu-miR-720; mmu-miR-30d; mmu-miR-762; mmu-let-7c; mmu-miR-151-5p; mmu-miR-30a; mmu-miR-291b-3p; mmu-miR-152; mmu-miR-330; mmu-miR-29a; mmu-miR-205; mmu-miR-29c; mmu-let-7a; mmu-miR-669f-3p; mmu-miR-760-3p; mmu-miR-378; mmu-miR-30b; mmu-miR-423-3p; mmu-let-7e; mmu-miR-103; mmu-m…
ABHD13	9.542	79	8.27919	mmu-miR-495; mmu-miR-335-5p; mmu-miR-713; mmu-miR-804; mmu-miR-96; mmu-miR-340-5p; mmu-miR-466b-3p; mmu-miR-30d; mmu-miR-28; mmu-miR-30a; mmu-miR-323-3p; mmu-miR-434-3p; mmu-miR-29c; mmu-miR-669f-3p; mmu-miR-367; mmu-miR-541; mmu-miR-468; mmu-miR-129-2-3p; mmu-miR-202-3p; mmu-miR-381; mmu-miR-672; mmu-miR-129-1-3p; mmu-miR-466a-3p; mmu-miR-195; mmu-miR-669l; mmu-miR-136; mmu-miR-760-5p; mmu-miR-6…
ABHD14A	1.062	5	4.7081	mmu-let-7g; mmu-let-7e; mmu-miR-145; mmu-let-7a; mmu-let-7c
ABHD14B	0.932	15	16.0944	mmu-miR-434-3p; mmu-miR-21; mmu-miR-124; mmu-miR-205; mmu-miR-669f-3p; mmu-miR-136; mmu-miR-19a; mmu-miR-484; mmu-miR-150; mmu-miR-129-2-3p; mmu-miR-202-3p; mmu-miR-381; mmu-miR-129-1-3p; mmu-miR-19b; mmu-miR-741
ABHD16A	1.973	41	20.7805	mmu-miR-713; mmu-miR-467c; mmu-miR-28; mmu-miR-669o-5p; mmu-miR-155; mmu-miR-290-3p; mmu-miR-34a; mmu-miR-467a; mmu-miR-1198-5p; mmu-miR-103; mmu-miR-26b; mmu-miR-672; mmu-miR-292-3p; mmu-miR-1952; mmu-miR-302a; mmu-miR-423-5p; mmu-miR-195; mmu-miR-302d; mmu-miR-350; mmu-miR-669l; mmu-miR-16; mmu-miR-669f-5p; mmu-miR-295; mmu-miR-762; mmu-miR-376c; mmu-miR-291b-3p; mmu-miR-34c; mmu-miR-760-3p; mm…
ABHD16B	1.775	50	28.169	mmu-miR-29b; mmu-miR-713; mmu-miR-804; mmu-miR-130a; mmu-miR-96; mmu-miR-130b; mmu-miR-150; mmu-miR-674; mmu-miR-291a-5p; mmu-miR-669o-5p; mmu-miR-181a; mmu-miR-29c; mmu-miR-155; mmu-miR-291b-5p; mmu-miR-132; mmu-miR-27a; mmu-miR-103; mmu-miR-182; mmu-miR-129-2-3p; mmu-miR-26b; mmu-miR-381; mmu-miR-129-1-3p; mmu-miR-195; mmu-miR-350; mmu-miR-148b; mmu-miR-1960; mmu-miR-669l; mmu-miR-125a-5p; mmu-…
ABHD2	5.549	63	11.3534	mmu-miR-29b; mmu-miR-495; mmu-miR-335-5p; mmu-miR-804; mmu-miR-93; mmu-miR-150; mmu-miR-20a; mmu-miR-291a-5p; mmu-miR-28; mmu-miR-669o-5p; mmu-miR-21; mmu-miR-29c; mmu-miR-290-3p; mmu-miR-205; mmu-miR-291b-5p; mmu-miR-34a; mmu-miR-27a; mmu-miR-467a; mmu-miR-106a; mmu-miR-182; mmu-miR-1983; mmu-miR-17; mmu-miR-129-2-3p; mmu-miR-26b; mmu-miR-1952; mmu-miR-292-3p; mmu-miR-129-1-3p; mmu-miR-423-5p; m…
ABHD4	2.804	24	8.5592	mmu-miR-302d; mmu-miR-669a-3p; mmu-miR-124; mmu-miR-29b; mmu-miR-429; mmu-miR-200b; mmu-miR-674; mmu-miR-295; mmu-miR-340-5p; mmu-miR-669o-5p; mmu-miR-34c; mmu-miR-29a; mmu-miR-29c; mmu-miR-132; mmu-miR-669o-3p; mmu-miR-34a; mmu-miR-129-2-3p; mmu-miR-291a-3p; mmu-miR-200c; mmu-miR-1952; mmu-miR-129-1-3p; mmu-miR-302a; mmu-miR-294; mmu-miR-423-5p
ABHD5	7.589	58	7.64264	mmu-miR-200a; mmu-miR-145; mmu-miR-29b; mmu-miR-93; mmu-miR-200b; mmu-miR-467c; mmu-miR-674; mmu-miR-20a; mmu-miR-340-5p; mmu-miR-296-5p; mmu-miR-466b-3p; mmu-miR-323-3p; mmu-miR-669o-5p; mmu-miR-29c; mmu-miR-290-3p; mmu-miR-543; mmu-miR-34a; mmu-miR-27a; mmu-miR-467a; mmu-miR-106a; mmu-miR-17; mmu-miR-26b; mmu-miR-1952; mmu-miR-292-3p; mmu-miR-302a; mmu-miR-423-5p; mmu-miR-302d; mmu-miR-124; mmu…
ABHD6	2.17	10	4.60829	mmu-miR-297c; mmu-miR-136; mmu-miR-382; mmu-miR-125a-5p; mmu-miR-191; mmu-miR-669d; mmu-miR-484; mmu-miR-125b-5p; mmu-miR-297a; mmu-miR-377
ABHD8	0.678	16	23.5988	mmu-miR-141; mmu-miR-195; mmu-miR-200a; mmu-miR-330; mmu-miR-760-3p; mmu-miR-22; mmu-miR-713; mmu-miR-15a; mmu-miR-16; mmu-miR-103; mmu-miR-150; mmu-miR-129-2-3p; mmu-miR-674; mmu-miR-129-1-3p; mmu-miR-15b; mmu-miR-28
ABI2	4.43	90	20.316	mmu-miR-495; mmu-miR-335-5p; mmu-miR-713; mmu-miR-804; mmu-miR-93; mmu-miR-96; mmu-miR-431; mmu-miR-466g; mmu-miR-19a; mmu-miR-20a; mmu-miR-30d; mmu-miR-466b-3p; mmu-miR-30a; mmu-miR-323-3p; mmu-miR-21; mmu-miR-669f-3p; mmu-miR-468; mmu-miR-106a; mmu-miR-129-2-3p; mmu-miR-17; mmu-miR-381; mmu-miR-672; mmu-miR-129-1-3p; mmu-miR-669a-3p; mmu-miR-466a-3p; mmu-miR-195; mmu-miR-433; mmu-miR-148b; mmu-…
ABL1	8.044	52	6.46445	mmu-miR-145; mmu-miR-29b; mmu-miR-335-5p; mmu-miR-713; mmu-miR-96; mmu-miR-674; mmu-miR-30d; mmu-miR-296-5p; mmu-miR-291a-5p; mmu-miR-28; mmu-miR-30a; mmu-miR-29c; mmu-miR-205; mmu-miR-669f-3p; mmu-miR-291b-5p; mmu-miR-132; mmu-miR-34a; mmu-miR-27a; mmu-miR-191; mmu-miR-30b; mmu-miR-182; mmu-miR-129-2-3p; mmu-miR-1952; mmu-miR-421; mmu-miR-672; mmu-miR-129-1-3p; mmu-miR-423-5p; mmu-miR-195; mmu-m…
ABL2	9.052	117	12.9253	mmu-miR-145; mmu-miR-495; mmu-miR-335-5p; mmu-miR-713; mmu-miR-804; mmu-miR-93; mmu-miR-96; mmu-miR-466g; mmu-miR-467c; mmu-miR-19a; mmu-miR-20a; mmu-miR-340-5p; mmu-miR-30d; mmu-miR-28; mmu-miR-30a; mmu-miR-323-3p; mmu-miR-434-3p; mmu-miR-155; mmu-miR-290-3p; mmu-miR-29c; mmu-let-7a; mmu-miR-367; mmu-miR-541; mmu-miR-106a; mmu-miR-468; mmu-miR-129-2-3p; mmu-miR-17; mmu-miR-202-3p; mmu-miR-292-3p…
ABLIM2	12.135	23	1.89534	mmu-miR-200a; mmu-miR-145; mmu-miR-335-5p; mmu-miR-484; mmu-miR-23b; mmu-miR-18b; mmu-miR-762; mmu-miR-296-5p; mmu-miR-377; mmu-miR-141; mmu-miR-669o-5p; mmu-miR-181a; mmu-miR-34c; mmu-miR-205; mmu-miR-543; mmu-miR-34a; mmu-miR-1198-5p; mmu-miR-541; mmu-miR-103; mmu-miR-381; mmu-miR-292-5p; mmu-miR-23a; mmu-miR-423-5p
ABLIM3	4.028	36	8.93744	mmu-miR-495; mmu-miR-431; mmu-miR-674; mmu-miR-467f; mmu-miR-466b-3p; mmu-miR-323-3p; mmu-miR-21; mmu-miR-290-3p; mmu-miR-132; mmu-miR-467a; mmu-miR-103; mmu-miR-129-2-3p; mmu-miR-421; mmu-miR-381; mmu-miR-292-3p; mmu-miR-129-1-3p; mmu-miR-148b; mmu-miR-1960; mmu-miR-669l; mmu-miR-136; mmu-miR-125a-5p; mmu-miR-148a; mmu-miR-669f-5p; mmu-miR-125b-5p; mmu-miR-18b; mmu-miR-376c; mmu-miR-101b; mmu-mi…
ABR	12.801	61	4.76525	mmu-miR-200a; mmu-miR-145; mmu-miR-495; mmu-miR-96; mmu-miR-19a; mmu-miR-369-3p; mmu-miR-340-5p; mmu-miR-296-5p; mmu-miR-291a-5p; mmu-miR-28; mmu-miR-205; mmu-miR-155; mmu-miR-543; mmu-miR-291b-5p; mmu-miR-34a; mmu-miR-27a; mmu-miR-1198-5p; mmu-miR-541; mmu-miR-103; mmu-miR-1983; mmu-miR-129-2-3p; mmu-miR-202-3p; mmu-miR-26b; mmu-miR-1952; mmu-miR-421; mmu-miR-672; mmu-miR-129-1-3p; mmu-miR-19b; …
ABT1	0.797	7	8.78294	mmu-miR-182; mmu-miR-484; mmu-miR-495; mmu-miR-674; mmu-miR-762; mmu-miR-28; mmu-miR-423-5p
ABTB1	0.541	10	18.4843	mmu-miR-297c; mmu-miR-22; mmu-miR-713; mmu-miR-378; mmu-miR-125a-5p; mmu-miR-183; mmu-miR-329; mmu-miR-125b-5p; mmu-miR-297a; mmu-miR-762
ABTB2	1.378	22	15.9652	mmu-miR-195; mmu-miR-124; mmu-miR-335-5p; mmu-miR-136; mmu-miR-16; mmu-miR-760-5p; mmu-miR-467f; mmu-miR-18b; mmu-miR-101b; mmu-miR-330; mmu-miR-181a; mmu-miR-205; mmu-miR-132; mmu-miR-22; mmu-miR-27a; mmu-miR-378; mmu-miR-15a; mmu-miR-129-2-3p; mmu-miR-1224; mmu-miR-381; mmu-miR-129-1-3p; mmu-miR-15b
ACAA1A	1.403	25	17.819	mmu-miR-302d; mmu-miR-32; mmu-miR-93; mmu-miR-760-5p; mmu-miR-363-3p; mmu-miR-20b; mmu-miR-295; mmu-miR-20a; mmu-miR-101b; mmu-miR-330; mmu-miR-367; mmu-miR-293; mmu-miR-378; mmu-miR-27a; mmu-miR-106b; mmu-miR-25; mmu-miR-106a; mmu-miR-1983; mmu-miR-291a-3p; mmu-miR-17; mmu-miR-329; mmu-miR-1952; mmu-miR-302a; mmu-miR-292-5p; mmu-miR-294
ACAA1B	1.231	31	25.1828	mmu-miR-195; mmu-miR-302d; mmu-miR-433; mmu-miR-124; mmu-miR-29b; mmu-miR-335-5p; mmu-miR-713; mmu-miR-93; mmu-miR-16; mmu-miR-20b; mmu-miR-20a; mmu-miR-295; mmu-miR-377; mmu-miR-330; mmu-miR-29c; mmu-miR-29a; mmu-miR-134; mmu-miR-293; mmu-miR-15a; mmu-miR-378; mmu-miR-106b; mmu-miR-1983; mmu-miR-106a; mmu-miR-468; mmu-miR-291a-3p; mmu-miR-17; mmu-miR-329; mmu-miR-1952; mmu-miR-15b; mmu-miR-302a;…
ACAA2	0.356	7	19.6629	mmu-miR-34c; mmu-miR-484; mmu-miR-124; mmu-miR-467e; mmu-miR-34a; mmu-miR-467h; mmu-miR-532-5p
ACACA	4.246	28	6.59444	mmu-miR-429; mmu-miR-713; mmu-miR-136; mmu-miR-125a-5p; mmu-miR-200b; mmu-miR-484; mmu-miR-674; mmu-miR-18b; mmu-miR-125b-5p; mmu-miR-467f; mmu-miR-376c; mmu-miR-466b-3p; mmu-miR-762; mmu-miR-377; mmu-miR-466c-3p; mmu-miR-760-3p; mmu-miR-134; mmu-miR-293; mmu-miR-378; mmu-miR-1198-5p; mmu-miR-183; mmu-miR-200c; mmu-miR-33; mmu-miR-1952; mmu-miR-142-5p; mmu-miR-381; mmu-miR-421; mmu-miR-466f
ACAD10	6.946	58	8.35013	mmu-miR-200a; mmu-miR-145; mmu-miR-29b; mmu-miR-335-5p; mmu-miR-804; mmu-miR-466g; mmu-miR-340-5p; mmu-miR-28; mmu-miR-434-3p; mmu-miR-29c; mmu-miR-205; mmu-miR-27a; mmu-miR-541; mmu-miR-468; mmu-miR-1983; mmu-miR-129-2-3p; mmu-miR-1952; mmu-miR-129-1-3p; mmu-miR-302a; mmu-miR-302d; mmu-miR-195; mmu-miR-433; mmu-miR-124; mmu-miR-148b; mmu-miR-1960; mmu-miR-136; mmu-miR-125a-5p; mmu-miR-16; mmu-mi…
ACAD8	9.167	44	4.79983	mmu-miR-200a; mmu-miR-495; mmu-miR-130a; mmu-miR-200b; mmu-miR-130b; mmu-miR-369-3p; mmu-miR-30d; mmu-miR-296-5p; mmu-miR-28; mmu-miR-30a; mmu-miR-669o-5p; mmu-miR-181a; mmu-miR-155; mmu-miR-205; mmu-miR-132; mmu-miR-34a; mmu-miR-30b; mmu-miR-103; mmu-miR-129-2-3p; mmu-miR-26b; mmu-miR-421; mmu-miR-672; mmu-miR-129-1-3p; mmu-miR-433; mmu-miR-350; mmu-miR-429; mmu-miR-136; mmu-miR-374; mmu-miR-669…
ACAD9	4.399	52	11.8209	mmu-miR-200a; mmu-miR-495; mmu-miR-335-5p; mmu-miR-804; mmu-miR-96; mmu-miR-431; mmu-miR-150; mmu-miR-674; mmu-miR-340-5p; mmu-miR-467f; mmu-miR-296-5p; mmu-miR-466b-3p; mmu-miR-291a-5p; mmu-miR-28; mmu-miR-21; mmu-miR-132; mmu-let-7a; mmu-miR-291b-5p; mmu-miR-669f-3p; mmu-miR-543; mmu-miR-541; mmu-miR-103; mmu-miR-468; mmu-miR-202-3p; mmu-miR-26b; mmu-miR-421; mmu-miR-466a-3p; mmu-let-7g; mmu-mi…
ACADL	1.469	20	13.6147	mmu-miR-466a-3p; mmu-miR-433; mmu-miR-335-5p; mmu-miR-872; mmu-miR-431; mmu-miR-19a; mmu-miR-484; mmu-miR-150; mmu-miR-674; mmu-miR-101b; mmu-miR-330; mmu-miR-760-3p; mmu-miR-669f-3p; mmu-miR-22; mmu-miR-293; mmu-miR-183; mmu-miR-26b; mmu-miR-154; mmu-miR-26a; mmu-miR-19b
ACADM	2.046	29	14.174	mmu-miR-195; mmu-miR-1960; mmu-miR-467e; mmu-miR-669l; mmu-miR-16; mmu-miR-374; mmu-miR-19a; mmu-miR-669f-5p; mmu-miR-484; mmu-miR-340-5p; mmu-miR-291a-5p; mmu-miR-377; mmu-miR-1196; mmu-miR-330; mmu-miR-205; mmu-miR-291b-5p; mmu-miR-132; mmu-miR-760-3p; mmu-miR-669a-5p; mmu-miR-27a; mmu-miR-15a; mmu-miR-467h; mmu-miR-103; mmu-miR-129-2-3p; mmu-miR-329; mmu-miR-129-1-3p; mmu-miR-15b; mmu-miR-19b;…
ACADS	4.541	28	6.16604	mmu-miR-200a; mmu-miR-433; mmu-miR-124; mmu-miR-713; mmu-miR-125a-5p; mmu-miR-669d; mmu-miR-484; mmu-miR-674; mmu-miR-125b-5p; mmu-miR-30d; mmu-miR-151-5p; mmu-miR-30a; mmu-miR-741; mmu-miR-141; mmu-miR-330; mmu-miR-34c; mmu-miR-127; mmu-miR-543; mmu-miR-34a; mmu-miR-376a; mmu-miR-27a; mmu-miR-30b; mmu-miR-103; mmu-miR-1224; mmu-miR-421; mmu-miR-672; mmu-miR-292-5p; mmu-miR-423-5p
ACADSB	3.95	45	11.3924	mmu-miR-200a; mmu-miR-29b; mmu-miR-495; mmu-miR-713; mmu-miR-93; mmu-miR-130a; mmu-miR-19a; mmu-miR-130b; mmu-miR-20a; mmu-miR-369-3p; mmu-miR-340-5p; mmu-miR-467f; mmu-miR-29c; mmu-miR-205; mmu-miR-543; mmu-miR-106a; mmu-miR-17; mmu-miR-26b; mmu-miR-381; mmu-miR-19b; mmu-miR-195; mmu-miR-350; mmu-miR-124; mmu-miR-297c; mmu-miR-136; mmu-miR-872; mmu-miR-16; mmu-miR-20b; mmu-miR-23b; mmu-miR-762; …
ACADVL	3.605	39	10.8183	mmu-miR-713; mmu-miR-804; mmu-miR-96; mmu-miR-150; mmu-miR-674; mmu-miR-296-5p; mmu-miR-291a-5p; mmu-miR-434-3p; mmu-miR-669o-5p; mmu-miR-291b-5p; mmu-miR-132; mmu-miR-541; mmu-miR-103; mmu-miR-182; mmu-miR-129-2-3p; mmu-miR-1952; mmu-miR-129-1-3p; mmu-miR-433; mmu-miR-124; mmu-miR-669l; mmu-miR-125a-5p; mmu-miR-669d; mmu-miR-669f-5p; mmu-miR-125b-5p; mmu-miR-762; mmu-miR-1945; mmu-miR-330; mmu-m…
ACAN	0.934	14	14.9893	mmu-miR-141; mmu-miR-200a; mmu-miR-124; mmu-miR-290-3p; mmu-miR-760-3p; mmu-miR-713; mmu-miR-467a; mmu-miR-96; mmu-miR-374; mmu-miR-183; mmu-miR-760-5p; mmu-miR-484; mmu-miR-182; mmu-miR-292-3p
ACAP2	4.034	76	18.8399	mmu-miR-335-5p; mmu-miR-713; mmu-miR-804; mmu-miR-93; mmu-miR-20a; mmu-miR-340-5p; mmu-miR-466b-3p; mmu-miR-30d; mmu-miR-28; mmu-miR-30a; mmu-miR-323-3p; mmu-miR-29c; mmu-miR-669f-3p; mmu-miR-1893; mmu-miR-106a; mmu-miR-17; mmu-miR-381; mmu-miR-672; mmu-miR-302a; mmu-miR-669a-3p; mmu-miR-466a-3p; mmu-miR-302d; mmu-miR-195; mmu-miR-124; mmu-miR-148b; mmu-miR-669l; mmu-miR-148a; mmu-miR-669f-5p; mm…
ACAP3	2.878	33	11.4663	mmu-miR-195; mmu-miR-142-3p; mmu-miR-29b; mmu-miR-467e; mmu-miR-495; mmu-miR-16; mmu-miR-125a-5p; mmu-miR-1198-3p; mmu-miR-18b; mmu-miR-125b-5p; mmu-miR-762; mmu-miR-30d; mmu-miR-296-5p; mmu-miR-291a-5p; mmu-miR-323-3p; mmu-miR-30a; mmu-miR-34c; mmu-miR-29a; mmu-miR-29c; mmu-miR-291b-5p; mmu-miR-22; mmu-miR-34a; mmu-miR-15a; mmu-miR-30b; mmu-miR-423-3p; mmu-miR-467h; mmu-miR-103; mmu-miR-1224; mm…
ACAT1	18.973	94	4.95441	mmu-miR-495; mmu-miR-713; mmu-miR-804; mmu-miR-93; mmu-miR-96; mmu-miR-466g; mmu-miR-19a; mmu-miR-20a; mmu-miR-340-5p; mmu-miR-30d; mmu-miR-30a; mmu-miR-21; mmu-miR-155; mmu-miR-367; mmu-let-7a; mmu-miR-468; mmu-miR-106a; mmu-miR-17; mmu-miR-381; mmu-miR-302a; mmu-miR-669a-3p; mmu-miR-302d; mmu-let-7g; mmu-miR-195; mmu-miR-433; mmu-miR-124; mmu-miR-148b; mmu-miR-148a; mmu-miR-20b; mmu-miR-295; mm…
ACAT3	3.383	40	11.8238	mmu-miR-145; mmu-miR-467e; mmu-miR-713; mmu-miR-93; mmu-miR-150; mmu-miR-674; mmu-miR-20a; mmu-miR-340-5p; mmu-miR-466b-3p; mmu-miR-434-3p; mmu-miR-669o-5p; mmu-miR-367; mmu-miR-132; mmu-miR-669o-3p; mmu-miR-467h; mmu-miR-1983; mmu-miR-103; mmu-miR-468; mmu-miR-106a; mmu-miR-17; mmu-miR-129-2-3p; mmu-miR-672; mmu-miR-129-1-3p; mmu-miR-669a-3p; mmu-miR-195; mmu-miR-32; mmu-miR-136; mmu-miR-872; mm…
ACBD3	2.045	49	23.9609	mmu-miR-145; mmu-miR-495; mmu-miR-804; mmu-miR-93; mmu-miR-130a; mmu-miR-466g; mmu-miR-19a; mmu-miR-130b; mmu-miR-150; mmu-miR-20a; mmu-miR-369-3p; mmu-miR-340-5p; mmu-miR-291a-5p; mmu-miR-181a; mmu-miR-155; mmu-miR-291b-5p; mmu-miR-669f-3p; mmu-miR-367; mmu-miR-34a; mmu-miR-103; mmu-miR-106a; mmu-miR-17; mmu-miR-1952; mmu-miR-421; mmu-miR-19b; mmu-miR-195; mmu-miR-32; mmu-miR-142-3p; mmu-miR-350…
ACBD4	3.161	21	6.64347	mmu-miR-195; mmu-miR-32; mmu-miR-335-5p; mmu-miR-16; mmu-miR-484; mmu-miR-363-3p; mmu-miR-150; mmu-miR-330; mmu-miR-205; mmu-miR-760-3p; mmu-miR-367; mmu-miR-15a; mmu-miR-378; mmu-miR-382; mmu-miR-25; mmu-miR-1983; mmu-miR-468; mmu-miR-329; mmu-miR-672; mmu-miR-15b; mmu-miR-466f
ACBD5	8.024	50	6.23131	mmu-miR-145; mmu-miR-93; mmu-miR-130a; mmu-miR-19a; mmu-miR-130b; mmu-miR-369-3p; mmu-miR-20a; mmu-miR-340-5p; mmu-miR-30d; mmu-miR-28; mmu-miR-30a; mmu-miR-323-3p; mmu-miR-669o-5p; mmu-miR-21; mmu-miR-155; mmu-miR-205; mmu-miR-367; mmu-miR-669f-3p; mmu-miR-1198-5p; mmu-miR-30b; mmu-miR-106a; mmu-miR-17; mmu-miR-26b; mmu-miR-421; mmu-miR-672; mmu-miR-302a; mmu-miR-19b; mmu-miR-302d; mmu-miR-32; m…
ACBD6	0.376	10	26.5957	mmu-miR-195; mmu-miR-291b-5p; mmu-miR-293; mmu-miR-15a; mmu-miR-27a; mmu-miR-16; mmu-miR-103; mmu-miR-484; mmu-miR-291a-5p; mmu-miR-15b
ACBD7	0.296	3	10.1351	mmu-miR-669a-3p; mmu-miR-669o-3p; mmu-miR-720
ACCS	33.587	81	2.41165	mmu-miR-145; mmu-miR-495; mmu-miR-335-5p; mmu-miR-713; mmu-miR-804; mmu-miR-93; mmu-miR-431; mmu-miR-466g; mmu-miR-467c; mmu-miR-20a; mmu-miR-30d; mmu-miR-28; mmu-miR-30a; mmu-miR-29c; mmu-miR-290-3p; mmu-miR-1893; mmu-miR-541; mmu-miR-106a; mmu-miR-468; mmu-miR-129-2-3p; mmu-miR-17; mmu-miR-292-3p; mmu-miR-672; mmu-miR-129-1-3p; mmu-miR-302a; mmu-miR-302d; mmu-miR-195; mmu-miR-433; mmu-miR-124; …
ACD	0.17	3	17.6471	mmu-miR-200c; mmu-miR-429; mmu-miR-200b
ACE	5.448	29	5.32305	mmu-miR-195; mmu-miR-466a-3p; mmu-miR-145; mmu-miR-1960; mmu-miR-136; mmu-miR-16; mmu-miR-431; mmu-miR-296-5p; mmu-miR-376c; mmu-miR-762; mmu-miR-28; mmu-miR-741; mmu-miR-155; mmu-miR-669f-3p; mmu-miR-27a; mmu-miR-378; mmu-miR-15a; mmu-miR-1198-5p; mmu-miR-193b; mmu-miR-1983; mmu-miR-26b; mmu-miR-1952; mmu-miR-421; mmu-miR-26a; mmu-miR-1935; mmu-miR-15b; mmu-miR-292-5p; mmu-miR-423-5p; mmu-miR-46…
ACER2	9.753	110	11.2786	mmu-miR-145; mmu-miR-713; mmu-miR-804; mmu-miR-93; mmu-miR-96; mmu-miR-466g; mmu-miR-19a; mmu-miR-20a; mmu-miR-340-5p; mmu-miR-30d; mmu-miR-466b-3p; mmu-miR-30a; mmu-miR-323-3p; mmu-miR-434-3p; mmu-miR-155; mmu-miR-29c; mmu-miR-290-3p; mmu-let-7a; mmu-miR-669f-3p; mmu-miR-541; mmu-miR-106a; mmu-miR-468; mmu-miR-17; mmu-miR-292-3p; mmu-miR-381; mmu-miR-672; mmu-miR-302a; mmu-miR-466a-3p; mmu-miR-3…
ACHE	0.7	12	17.1429	mmu-miR-152; mmu-miR-124; mmu-miR-145; mmu-miR-148b; mmu-miR-132; mmu-miR-669f-3p; mmu-miR-148a; mmu-miR-423-3p; mmu-miR-129-2-3p; mmu-miR-129-1-3p; mmu-miR-28; mmu-miR-423-5p
ACIN1	14.665	56	3.81862	mmu-miR-145; mmu-miR-29b; mmu-miR-713; mmu-miR-93; mmu-miR-96; mmu-miR-674; mmu-miR-20a; mmu-miR-340-5p; mmu-miR-29c; mmu-miR-205; mmu-miR-34a; mmu-miR-106a; mmu-miR-103; mmu-miR-182; mmu-miR-129-2-3p; mmu-miR-17; mmu-miR-26b; mmu-miR-421; mmu-miR-672; mmu-miR-129-1-3p; mmu-miR-302a; mmu-miR-423-5p; mmu-miR-302d; mmu-miR-195; mmu-miR-350; mmu-miR-1960; mmu-miR-136; mmu-miR-16; mmu-miR-760-5p; mmu…
ACLY	5.542	48	8.66113	mmu-miR-145; mmu-miR-29b; mmu-miR-804; mmu-miR-96; mmu-miR-466g; mmu-miR-19a; mmu-miR-674; mmu-miR-369-3p; mmu-miR-181a; mmu-miR-29c; mmu-miR-155; mmu-miR-205; mmu-miR-669o-3p; mmu-miR-27a; mmu-miR-1198-5p; mmu-miR-129-2-3p; mmu-miR-1952; mmu-miR-129-1-3p; mmu-miR-302a; mmu-miR-19b; mmu-miR-669a-3p; mmu-miR-302d; mmu-miR-1960; mmu-miR-297c; mmu-miR-669l; mmu-miR-136; mmu-miR-374; mmu-miR-669d; mm…
ACN9	4.126	58	14.0572	mmu-miR-200a; mmu-miR-145; mmu-miR-335-5p; mmu-miR-804; mmu-miR-96; mmu-miR-467c; mmu-miR-19a; mmu-miR-150; mmu-miR-674; mmu-miR-340-5p; mmu-miR-467f; mmu-miR-30d; mmu-miR-291a-5p; mmu-miR-30a; mmu-miR-181a; mmu-miR-155; mmu-miR-205; mmu-let-7a; mmu-miR-291b-5p; mmu-miR-367; mmu-miR-669f-3p; mmu-miR-27a; mmu-miR-1198-5p; mmu-miR-30b; mmu-miR-182; mmu-miR-468; mmu-miR-202-3p; mmu-miR-26b; mmu-miR-…
ACO1	0.785	21	26.7516	mmu-miR-200a; mmu-miR-433; mmu-miR-29b; mmu-miR-350; mmu-miR-429; mmu-miR-136; mmu-miR-200b; mmu-miR-466g; mmu-miR-467c; mmu-miR-28; mmu-miR-141; mmu-miR-34c; mmu-miR-127; mmu-miR-29a; mmu-miR-29c; mmu-miR-335-3p; mmu-miR-760-3p; mmu-miR-34a; mmu-miR-193b; mmu-miR-200c; mmu-miR-1952
ACO2	0.506	3	5.92885	mmu-miR-205; mmu-miR-760-3p; mmu-miR-762
ACOT1	0.891	12	13.468	mmu-miR-434-3p; mmu-miR-669o-5p; mmu-miR-145; mmu-miR-136; mmu-miR-96; mmu-miR-374; mmu-miR-872; mmu-miR-129-2-3p; mmu-miR-369-3p; mmu-miR-720; mmu-miR-154; mmu-miR-129-1-3p
ACOT11	13.689	69	5.04054	mmu-miR-495; mmu-miR-335-5p; mmu-miR-96; mmu-miR-431; mmu-miR-466b-3p; mmu-miR-28; mmu-miR-29c; mmu-miR-155; mmu-let-7a; mmu-miR-129-2-3p; mmu-miR-202-3p; mmu-miR-129-1-3p; mmu-miR-302a; mmu-miR-466a-3p; mmu-miR-302d; mmu-let-7g; mmu-miR-195; mmu-miR-433; mmu-miR-148b; mmu-miR-136; mmu-miR-125a-5p; mmu-miR-148a; mmu-miR-295; mmu-miR-23b; mmu-miR-125b-5p; mmu-miR-377; mmu-miR-466c-3p; mmu-miR-1196…
ACOT13	0.244	3	12.2951	mmu-miR-350; mmu-miR-674; mmu-miR-382
ACOT2	1.372	15	10.9329	mmu-miR-433; mmu-miR-669o-5p; mmu-miR-145; mmu-miR-205; mmu-miR-382; mmu-miR-96; mmu-miR-872; mmu-miR-669d; mmu-miR-376b; mmu-miR-484; mmu-miR-154; mmu-miR-672; mmu-miR-1935; mmu-miR-292-5p; mmu-miR-466f
ACOT4	1.533	19	12.394	mmu-miR-195; mmu-miR-804; mmu-miR-136; mmu-miR-16; mmu-miR-484; mmu-miR-23b; mmu-miR-18b; mmu-miR-296-5p; mmu-miR-1196; mmu-miR-21; mmu-miR-155; mmu-miR-205; mmu-miR-543; mmu-miR-760-3p; mmu-miR-15a; mmu-miR-329; mmu-miR-15b; mmu-miR-23a; mmu-miR-410
ACOT5	1.434	12	8.3682	mmu-miR-181a; mmu-miR-330; mmu-miR-669o-5p; mmu-miR-145; mmu-miR-29a; mmu-miR-29b; mmu-miR-29c; mmu-miR-291b-5p; mmu-miR-374; mmu-miR-532-5p; mmu-miR-369-3p; mmu-miR-291a-5p
ACOT6	2.41	31	12.8631	mmu-miR-145; mmu-miR-297c; mmu-miR-495; mmu-miR-713; mmu-miR-136; mmu-miR-374; mmu-miR-872; mmu-miR-466g; mmu-miR-760-5p; mmu-miR-669d; mmu-miR-150; mmu-miR-674; mmu-miR-18b; mmu-miR-23b; mmu-miR-377; mmu-miR-669o-5p; mmu-miR-330; mmu-miR-205; mmu-miR-132; mmu-miR-760-3p; mmu-miR-376a; mmu-miR-27a; mmu-miR-1198-5p; mmu-miR-193b; mmu-miR-182; mmu-miR-376b; mmu-miR-1224; mmu-miR-672; mmu-miR-297a; …
ACOT7	1.516	7	4.61741	mmu-miR-141; mmu-miR-200a; mmu-miR-330; mmu-miR-205; mmu-miR-134; mmu-miR-760-3p; mmu-miR-377
ACOT8	2.022	31	15.3314	mmu-let-7g; mmu-miR-148b; mmu-miR-1960; mmu-miR-297c; mmu-miR-713; mmu-miR-130a; mmu-miR-148a; mmu-miR-19a; mmu-miR-669d; mmu-miR-130b; mmu-miR-150; mmu-miR-674; mmu-miR-762; mmu-let-7c; mmu-miR-741; mmu-miR-21; mmu-miR-34c; mmu-miR-152; mmu-miR-127; mmu-miR-134; mmu-let-7a; mmu-miR-22; mmu-miR-34a; mmu-miR-301a; mmu-miR-532-5p; mmu-miR-1983; mmu-let-7e; mmu-miR-672; mmu-miR-1935; mmu-miR-297a; m…
ACOT9	0.309	3	9.70874	mmu-miR-376b; mmu-miR-335-3p; mmu-miR-27a
ACOX1	10.86	59	5.43278	mmu-miR-200a; mmu-miR-335-5p; mmu-miR-804; mmu-miR-93; mmu-miR-200b; mmu-miR-431; mmu-miR-20a; mmu-miR-466b-3p; mmu-miR-296-5p; mmu-miR-132; mmu-miR-669o-3p; mmu-miR-34a; mmu-miR-27a; mmu-miR-541; mmu-miR-103; mmu-miR-1983; mmu-miR-106a; mmu-miR-17; mmu-miR-26b; mmu-miR-302a; mmu-miR-669a-3p; mmu-miR-302d; mmu-miR-195; mmu-miR-433; mmu-miR-142-3p; mmu-miR-350; mmu-miR-1960; mmu-miR-429; mmu-miR-1…
ACOX3	3.574	36	10.0727	mmu-miR-335-5p; mmu-miR-19a; mmu-miR-674; mmu-miR-467f; mmu-miR-155; mmu-miR-367; mmu-miR-103; mmu-miR-26b; mmu-miR-421; mmu-miR-19b; mmu-miR-195; mmu-miR-32; mmu-miR-125a-5p; mmu-miR-16; mmu-miR-760-5p; mmu-miR-669d; mmu-miR-363-3p; mmu-miR-484; mmu-miR-125b-5p; mmu-miR-151-5p; mmu-miR-101b; mmu-miR-330; mmu-miR-127; mmu-miR-760-3p; mmu-miR-22; mmu-miR-15a; mmu-miR-193b; mmu-miR-183; mmu-miR-25;…
ACP1	5.256	47	8.94216	mmu-miR-29b; mmu-miR-713; mmu-miR-200b; mmu-miR-467f; mmu-miR-340-5p; mmu-miR-466b-3p; mmu-miR-669o-5p; mmu-miR-181a; mmu-miR-29c; mmu-miR-669f-3p; mmu-miR-543; mmu-let-7a; mmu-miR-132; mmu-miR-103; mmu-miR-129-2-3p; mmu-miR-202-3p; mmu-miR-381; mmu-miR-129-1-3p; mmu-let-7g; mmu-miR-466a-3p; mmu-miR-433; mmu-miR-124; mmu-miR-669l; mmu-miR-429; mmu-miR-125a-5p; mmu-miR-760-5p; mmu-miR-669f-5p; mmu…
ACP2	3.492	63	18.0412	mmu-miR-495; mmu-miR-200b; mmu-miR-466g; mmu-miR-150; mmu-miR-674; mmu-miR-467f; mmu-miR-30d; mmu-miR-296-5p; mmu-miR-28; mmu-miR-30a; mmu-miR-669o-5p; mmu-miR-205; mmu-miR-669f-3p; mmu-miR-34a; mmu-miR-27a; mmu-miR-1198-5p; mmu-miR-30b; mmu-miR-1983; mmu-miR-129-2-3p; mmu-miR-26b; mmu-miR-1952; mmu-miR-154; mmu-miR-381; mmu-miR-672; mmu-miR-129-1-3p; mmu-miR-302a; mmu-miR-466a-3p; mmu-miR-302d; …
ACP6	0.244	8	32.7869	mmu-miR-124; mmu-miR-30b; mmu-miR-466g; mmu-miR-142-5p; mmu-miR-340-5p; mmu-miR-30d; mmu-miR-30a; mmu-miR-410
ACPP	10.092	89	8.81887	mmu-miR-145; mmu-miR-495; mmu-miR-713; mmu-miR-804; mmu-miR-93; mmu-miR-96; mmu-miR-466g; mmu-miR-20a; mmu-miR-340-5p; mmu-miR-30d; mmu-miR-466b-3p; mmu-miR-28; mmu-miR-30a; mmu-miR-434-3p; mmu-miR-29c; mmu-miR-290-3p; mmu-let-7a; mmu-miR-541; mmu-miR-106a; mmu-miR-468; mmu-miR-129-2-3p; mmu-miR-17; mmu-miR-202-3p; mmu-miR-292-3p; mmu-miR-129-1-3p; mmu-miR-302a; mmu-miR-302d; mmu-let-7g; mmu-miR-…
ACSF2	3.121	58	18.5838	mmu-miR-145; mmu-miR-495; mmu-miR-335-5p; mmu-miR-93; mmu-miR-431; mmu-miR-19a; mmu-miR-150; mmu-miR-674; mmu-miR-20a; mmu-miR-296-5p; mmu-miR-291a-5p; mmu-miR-669o-5p; mmu-miR-181a; mmu-miR-205; mmu-miR-669f-3p; mmu-miR-291b-5p; mmu-miR-34a; mmu-miR-669o-3p; mmu-miR-27a; mmu-miR-103; mmu-miR-106a; mmu-miR-468; mmu-miR-17; mmu-miR-129-2-3p; mmu-miR-1952; mmu-miR-421; mmu-miR-129-1-3p; mmu-miR-302…
ACSL1	5.628	46	8.17342	mmu-miR-200a; mmu-miR-804; mmu-miR-93; mmu-miR-130a; mmu-miR-19a; mmu-miR-130b; mmu-miR-369-3p; mmu-miR-20a; mmu-miR-340-5p; mmu-miR-669o-5p; mmu-miR-181a; mmu-miR-205; mmu-miR-669f-3p; mmu-miR-543; mmu-miR-34a; mmu-miR-27a; mmu-miR-106a; mmu-miR-17; mmu-miR-1952; mmu-miR-421; mmu-miR-19b; mmu-miR-195; mmu-miR-124; mmu-miR-297c; mmu-miR-374; mmu-miR-16; mmu-miR-760-5p; mmu-miR-20b; mmu-miR-23b; m…
ACSL3	8.716	56	6.42497	mmu-miR-200a; mmu-miR-145; mmu-miR-29b; mmu-miR-200b; mmu-miR-674; mmu-miR-466b-3p; mmu-miR-28; mmu-miR-21; mmu-miR-29c; mmu-miR-205; mmu-miR-155; mmu-miR-27a; mmu-miR-541; mmu-miR-1983; mmu-miR-103; mmu-miR-129-2-3p; mmu-miR-26b; mmu-miR-1952; mmu-miR-381; mmu-miR-421; mmu-miR-672; mmu-miR-129-1-3p; mmu-miR-466a-3p; mmu-miR-195; mmu-miR-142-3p; mmu-miR-669l; mmu-miR-429; mmu-miR-136; mmu-miR-125…
ACSL4	14.431	78	5.40503	mmu-miR-145; mmu-miR-335-5p; mmu-miR-93; mmu-miR-466g; mmu-miR-467c; mmu-miR-19a; mmu-miR-20a; mmu-miR-340-5p; mmu-miR-466b-3p; mmu-miR-323-3p; mmu-miR-434-3p; mmu-miR-669f-3p; mmu-miR-367; mmu-miR-468; mmu-miR-106a; mmu-miR-17; mmu-miR-381; mmu-miR-669a-3p; mmu-miR-466a-3p; mmu-miR-195; mmu-miR-433; mmu-miR-148b; mmu-miR-669l; mmu-miR-148a; mmu-miR-669f-5p; mmu-miR-20b; mmu-miR-23b; mmu-miR-466c…
ACSL5	0.412	13	31.5534	mmu-miR-142-3p; mmu-miR-1960; mmu-miR-760-3p; mmu-miR-429; mmu-miR-130a; mmu-miR-200b; mmu-miR-301a; mmu-miR-182; mmu-miR-130b; mmu-miR-376b; mmu-miR-200c; mmu-miR-101b; mmu-miR-741
ACSL6	29.576	76	2.56965	mmu-miR-495; mmu-miR-713; mmu-miR-93; mmu-miR-96; mmu-miR-431; mmu-miR-467c; mmu-miR-19a; mmu-miR-20a; mmu-miR-296-5p; mmu-miR-466b-3p; mmu-miR-28; mmu-miR-323-3p; mmu-miR-434-3p; mmu-miR-21; mmu-miR-290-3p; mmu-let-7a; mmu-miR-541; mmu-miR-106a; mmu-miR-468; mmu-miR-17; mmu-miR-202-3p; mmu-miR-292-3p; mmu-miR-381; mmu-miR-672; mmu-miR-302a; mmu-miR-302d; mmu-let-7g; mmu-miR-195; mmu-miR-136; mmu…
ACSS1	4.344	51	11.7403	mmu-miR-145; mmu-miR-29b; mmu-miR-467e; mmu-miR-495; mmu-miR-713; mmu-miR-804; mmu-miR-130a; mmu-miR-19a; mmu-miR-130b; mmu-miR-150; mmu-miR-291a-5p; mmu-miR-181a; mmu-miR-29c; mmu-miR-291b-5p; mmu-let-7a; mmu-miR-27a; mmu-miR-1198-5p; mmu-miR-467h; mmu-miR-103; mmu-miR-1983; mmu-miR-468; mmu-miR-1952; mmu-miR-19b; mmu-let-7g; mmu-miR-195; mmu-miR-433; mmu-miR-350; mmu-miR-124; mmu-miR-136; mmu-m…
ACSS2	2.732	31	11.347	mmu-miR-433; mmu-miR-145; mmu-miR-350; mmu-miR-495; mmu-miR-804; mmu-miR-130a; mmu-miR-125a-5p; mmu-miR-130b; mmu-miR-484; mmu-miR-125b-5p; mmu-miR-376c; mmu-miR-151-5p; mmu-miR-377; mmu-miR-205; mmu-miR-290-3p; mmu-miR-132; mmu-miR-134; mmu-miR-22; mmu-miR-27a; mmu-miR-382; mmu-miR-467a; mmu-miR-301a; mmu-miR-1983; mmu-miR-376b; mmu-miR-26b; mmu-miR-292-3p; mmu-miR-672; mmu-miR-26a; mmu-miR-292-…
ACSS3	1.822	21	11.5258	mmu-miR-32; mmu-miR-433; mmu-miR-136; mmu-miR-466g; mmu-miR-363-3p; mmu-miR-466b-3p; mmu-miR-466c-3p; mmu-miR-434-3p; mmu-miR-330; mmu-miR-543; mmu-miR-367; mmu-miR-22; mmu-miR-382; mmu-miR-25; mmu-miR-129-2-3p; mmu-miR-26b; mmu-miR-672; mmu-miR-33; mmu-miR-129-1-3p; mmu-miR-1935; mmu-miR-26a
ACTB	3.948	26	6.58561	mmu-let-7g; mmu-miR-195; mmu-miR-433; mmu-miR-145; mmu-miR-136; mmu-miR-16; mmu-miR-18b; mmu-let-7c; mmu-miR-28; mmu-miR-487b; mmu-miR-34c; mmu-miR-330; mmu-miR-205; mmu-let-7a; mmu-miR-132; mmu-miR-376a; mmu-miR-34a; mmu-miR-15a; mmu-miR-423-3p; mmu-let-7e; mmu-miR-129-2-3p; mmu-miR-202-3p; mmu-miR-129-1-3p; mmu-miR-15b; mmu-miR-292-5p; mmu-miR-423-5p
ACTG1	7.362	20	2.71665	mmu-let-7g; mmu-miR-433; mmu-miR-145; mmu-miR-1960; mmu-miR-136; mmu-miR-466b-3p; mmu-let-7c; mmu-miR-466c-3p; mmu-miR-330; mmu-let-7a; mmu-miR-532-5p; mmu-miR-103; mmu-let-7e; mmu-miR-1983; mmu-miR-376b; mmu-miR-129-2-3p; mmu-miR-202-3p; mmu-miR-381; mmu-miR-129-1-3p; mmu-miR-423-5p
ACTL10	1.501	22	14.6569	mmu-miR-195; mmu-miR-142-3p; mmu-miR-1960; mmu-miR-29b; mmu-miR-669l; mmu-miR-713; mmu-miR-16; mmu-miR-1198-3p; mmu-miR-431; mmu-miR-669f-5p; mmu-miR-377; mmu-miR-181a; mmu-miR-29a; mmu-miR-29c; mmu-miR-669a-5p; mmu-miR-1893; mmu-miR-15a; mmu-miR-423-3p; mmu-miR-193b; mmu-miR-541; mmu-miR-1952; mmu-miR-15b
ACTL6A	0.447	17	38.0313	mmu-miR-291b-3p; mmu-miR-302d; mmu-miR-181a; mmu-miR-290-3p; mmu-miR-467e; mmu-miR-543; mmu-miR-467a; mmu-miR-467h; mmu-miR-466g; mmu-miR-467c; mmu-miR-291a-3p; mmu-miR-329; mmu-miR-295; mmu-miR-292-3p; mmu-miR-340-5p; mmu-miR-302a; mmu-miR-294
ACTL6B	0.66	3	4.54545	mmu-miR-330; mmu-miR-335-3p; mmu-miR-27a
ACTL7B	1.308	19	14.526	mmu-miR-302d; mmu-miR-200a; mmu-miR-467c; mmu-miR-295; mmu-miR-151-5p; mmu-miR-141; mmu-miR-291b-3p; mmu-miR-669o-5p; mmu-miR-290-3p; mmu-miR-467a; mmu-miR-183; mmu-miR-376b; mmu-miR-129-2-3p; mmu-miR-291a-3p; mmu-miR-1224; mmu-miR-292-3p; mmu-miR-129-1-3p; mmu-miR-302a; mmu-miR-294
ACTN1	0.939	11	11.7146	mmu-miR-669a-3p; mmu-miR-669o-3p; mmu-miR-30b; mmu-miR-374; mmu-miR-1198-3p; mmu-miR-19a; mmu-miR-369-3p; mmu-miR-30d; mmu-miR-30a; mmu-miR-19b; mmu-miR-410
ACTN2	0.454	11	24.2291	mmu-miR-32; mmu-miR-34c; mmu-miR-367; mmu-miR-34a; mmu-miR-466g; mmu-miR-541; mmu-miR-25; mmu-miR-363-3p; mmu-miR-33; mmu-miR-296-5p; mmu-miR-1935
ACTN3	1.263	15	11.8765	mmu-miR-330; mmu-miR-433; mmu-miR-290-3p; mmu-miR-22; mmu-miR-136; mmu-miR-467a; mmu-miR-125a-5p; mmu-miR-183; mmu-miR-423-3p; mmu-miR-1983; mmu-miR-103; mmu-miR-292-3p; mmu-miR-125b-5p; mmu-miR-33; mmu-miR-762
ACTN4	6.375	37	5.80392	mmu-miR-145; mmu-miR-96; mmu-miR-431; mmu-miR-150; mmu-miR-369-3p; mmu-miR-132; mmu-miR-27a; mmu-miR-541; mmu-miR-182; mmu-miR-103; mmu-miR-129-2-3p; mmu-miR-1952; mmu-miR-154; mmu-miR-129-1-3p; mmu-miR-195; mmu-miR-433; mmu-miR-124; mmu-miR-297c; mmu-miR-136; mmu-miR-16; mmu-miR-374; mmu-miR-18b; mmu-miR-762; mmu-miR-741; mmu-miR-330; mmu-miR-127; mmu-miR-15a; mmu-miR-378; mmu-miR-183; mmu-miR-1…
ACTR10	2.878	67	23.2801	mmu-miR-200a; mmu-miR-467e; mmu-miR-29b; mmu-miR-335-5p; mmu-miR-200b; mmu-miR-431; mmu-miR-466g; mmu-miR-467c; mmu-miR-19a; mmu-miR-150; mmu-miR-369-3p; mmu-miR-674; mmu-miR-467f; mmu-miR-466b-3p; mmu-miR-291a-5p; mmu-miR-28; mmu-miR-181a; mmu-miR-21; mmu-miR-29c; mmu-miR-290-3p; mmu-miR-155; mmu-miR-543; mmu-miR-291b-5p; mmu-miR-132; mmu-miR-367; mmu-miR-669o-3p; mmu-miR-467a; mmu-miR-1198-5p; …
ACTR1A	1.656	39	23.5507	mmu-miR-495; mmu-miR-93; mmu-miR-96; mmu-miR-200b; mmu-miR-19a; mmu-miR-150; mmu-miR-20a; mmu-miR-296-5p; mmu-miR-30d; mmu-miR-466b-3p; mmu-miR-30a; mmu-miR-323-3p; mmu-miR-434-3p; mmu-miR-34a; mmu-miR-30b; mmu-miR-106a; mmu-miR-17; mmu-miR-19b; mmu-miR-195; mmu-miR-466a-3p; mmu-miR-429; mmu-miR-136; mmu-miR-16; mmu-miR-484; mmu-miR-20b; mmu-miR-741; mmu-miR-377; mmu-miR-466c-3p; mmu-miR-1945; mm…
ACTR2	3.572	52	14.5577	mmu-miR-200a; mmu-miR-495; mmu-miR-335-5p; mmu-miR-713; mmu-miR-804; mmu-miR-466g; mmu-miR-150; mmu-miR-674; mmu-miR-466b-3p; mmu-miR-296-5p; mmu-miR-323-3p; mmu-miR-669o-5p; mmu-miR-181a; mmu-miR-205; mmu-let-7a; mmu-miR-132; mmu-miR-669o-3p; mmu-miR-1198-5p; mmu-miR-541; mmu-miR-103; mmu-miR-182; mmu-miR-1983; mmu-miR-468; mmu-miR-202-3p; mmu-miR-672; mmu-miR-669a-3p; mmu-let-7g; mmu-miR-195; m…
ACTR3	2.372	23	9.69646	mmu-miR-200a; mmu-miR-433; mmu-miR-145; mmu-miR-350; mmu-miR-429; mmu-miR-200b; mmu-miR-466g; mmu-miR-674; mmu-miR-23b; mmu-miR-340-5p; mmu-miR-467f; mmu-miR-762; mmu-miR-291a-5p; mmu-miR-141; mmu-miR-335-3p; mmu-miR-291b-5p; mmu-miR-669f-3p; mmu-miR-132; mmu-miR-329; mmu-miR-200c; mmu-miR-381; mmu-miR-142-5p; mmu-miR-23a
ACTR3B	0.984	10	10.1626	mmu-miR-330; mmu-miR-132; mmu-miR-543; mmu-miR-126-3p; mmu-miR-26b; mmu-miR-329; mmu-miR-1952; mmu-miR-26a; mmu-miR-377; mmu-miR-423-5p
ACTR5	0.579	29	50.0864	mmu-let-7g; mmu-miR-195; mmu-miR-200a; mmu-miR-148b; mmu-miR-29b; mmu-miR-130a; mmu-miR-16; mmu-miR-148a; mmu-miR-760-5p; mmu-miR-19a; mmu-miR-130b; mmu-miR-484; mmu-miR-674; mmu-let-7c; mmu-miR-141; mmu-miR-152; mmu-miR-205; mmu-miR-29a; mmu-miR-29c; mmu-let-7a; mmu-miR-15a; mmu-miR-301a; mmu-miR-193b; mmu-miR-1983; mmu-let-7e; mmu-miR-376b; mmu-miR-202-3p; mmu-miR-15b; mmu-miR-19b
ACTR6	0.588	9	15.3061	mmu-miR-466c-3p; mmu-miR-495; mmu-miR-132; mmu-miR-291b-5p; mmu-miR-27a; mmu-miR-26b; mmu-miR-466b-3p; mmu-miR-26a; mmu-miR-291a-5p
ACTR8	0.261	6	22.9885	mmu-miR-466a-3p; mmu-miR-466c-3p; mmu-miR-543; mmu-miR-33; mmu-miR-720; mmu-miR-466b-3p
ACVR1	6.48	60	9.25926	mmu-miR-200a; mmu-miR-495; mmu-miR-804; mmu-miR-130a; mmu-miR-96; mmu-miR-431; mmu-miR-467c; mmu-miR-19a; mmu-miR-130b; mmu-miR-150; mmu-miR-467f; mmu-miR-30d; mmu-miR-291a-5p; mmu-miR-30a; mmu-miR-669o-5p; mmu-miR-155; mmu-miR-290-3p; mmu-miR-132; mmu-miR-291b-5p; mmu-miR-27a; mmu-miR-467a; mmu-miR-1198-5p; mmu-miR-30b; mmu-miR-103; mmu-miR-182; mmu-miR-468; mmu-miR-129-2-3p; mmu-miR-292-3p; mmu…
ACVR1B	2.942	50	16.9952	mmu-miR-145; mmu-miR-29b; mmu-miR-467e; mmu-miR-495; mmu-miR-713; mmu-miR-93; mmu-miR-19a; mmu-miR-150; mmu-miR-20a; mmu-miR-674; mmu-miR-467f; mmu-miR-669o-5p; mmu-miR-181a; mmu-miR-29c; mmu-miR-669f-3p; mmu-let-7a; mmu-miR-467h; mmu-miR-541; mmu-miR-106a; mmu-miR-17; mmu-miR-154; mmu-miR-1952; mmu-miR-19b; mmu-let-7g; mmu-miR-195; mmu-miR-669l; mmu-miR-136; mmu-miR-872; mmu-miR-125a-5p; mmu-miR…
ACVR1C	30.364	115	3.78738	mmu-miR-145; mmu-miR-495; mmu-miR-335-5p; mmu-miR-713; mmu-miR-93; mmu-miR-96; mmu-miR-466g; mmu-miR-19a; mmu-miR-20a; mmu-miR-340-5p; mmu-miR-30d; mmu-miR-466b-3p; mmu-miR-30a; mmu-miR-434-3p; mmu-miR-21; mmu-miR-669f-3p; mmu-let-7a; mmu-miR-541; mmu-miR-106a; mmu-miR-468; mmu-miR-129-2-3p; mmu-miR-17; mmu-miR-202-3p; mmu-miR-672; mmu-miR-129-1-3p; mmu-miR-302a; mmu-miR-669a-3p; mmu-miR-466a-3p;…
ACVR2A	3.676	76	20.6746	mmu-miR-145; mmu-miR-495; mmu-miR-335-5p; mmu-miR-93; mmu-miR-96; mmu-miR-466g; mmu-miR-20a; mmu-miR-340-5p; mmu-miR-296-5p; mmu-miR-30d; mmu-miR-466b-3p; mmu-miR-30a; mmu-miR-21; mmu-miR-29c; mmu-miR-155; mmu-miR-669f-3p; mmu-let-7a; mmu-miR-106a; mmu-miR-17; mmu-miR-202-3p; mmu-miR-381; mmu-miR-672; mmu-miR-466a-3p; mmu-let-7g; mmu-miR-195; mmu-miR-433; mmu-miR-124; mmu-miR-669l; mmu-miR-136; m…
ACVR2B	14.168	98	6.917	mmu-miR-495; mmu-miR-335-5p; mmu-miR-713; mmu-miR-93; mmu-miR-96; mmu-miR-431; mmu-miR-466g; mmu-miR-20a; mmu-miR-340-5p; mmu-miR-296-5p; mmu-miR-30d; mmu-miR-28; mmu-miR-30a; mmu-miR-323-3p; mmu-miR-434-3p; mmu-miR-21; mmu-miR-29c; mmu-let-7a; mmu-miR-541; mmu-miR-106a; mmu-miR-129-2-3p; mmu-miR-17; mmu-miR-202-3p; mmu-miR-154; mmu-miR-672; mmu-miR-129-1-3p; mmu-miR-302a; mmu-miR-302d; mmu-let-7…
ACVRL1	11.964	30	2.50752	mmu-miR-302d; mmu-miR-124; mmu-miR-145; mmu-miR-335-5p; mmu-miR-713; mmu-miR-484; mmu-miR-150; mmu-miR-674; mmu-miR-295; mmu-miR-23b; mmu-miR-762; mmu-miR-28; mmu-miR-377; mmu-miR-741; mmu-miR-21; mmu-miR-669o-5p; mmu-miR-330; mmu-miR-205; mmu-miR-134; mmu-miR-760-3p; mmu-miR-1983; mmu-miR-376b; mmu-miR-291a-3p; mmu-miR-129-2-3p; mmu-miR-329; mmu-miR-129-1-3p; mmu-miR-1935; mmu-miR-302a; mmu-miR-…
ACY1	0.291	3	10.3093	mmu-miR-291b-3p; mmu-miR-34c; mmu-miR-34a
ACYP1	1.29	8	6.20155	mmu-miR-1196; mmu-miR-495; mmu-miR-200c; mmu-miR-429; mmu-miR-467f; mmu-miR-1198-5p; mmu-miR-200b; mmu-miR-760-5p
ACYP2	0.449	10	22.2717	mmu-miR-152; mmu-miR-148b; mmu-miR-669f-3p; mmu-miR-130a; mmu-miR-301a; mmu-miR-374; mmu-miR-148a; mmu-miR-130b; mmu-miR-150; mmu-miR-369-3p
ADA	0.807	17	21.0657	mmu-let-7g; mmu-miR-93; mmu-miR-431; mmu-miR-20b; mmu-miR-20a; mmu-miR-466b-3p; mmu-let-7c; mmu-miR-291b-3p; mmu-miR-466c-3p; mmu-miR-330; mmu-let-7a; mmu-miR-106b; mmu-miR-106a; mmu-let-7e; mmu-miR-17; mmu-miR-1224; mmu-miR-202-3p
ADAD1	2.318	23	9.92235	mmu-miR-466a-3p; mmu-miR-200a; mmu-miR-297c; mmu-miR-350; mmu-miR-495; mmu-miR-374; mmu-miR-466g; mmu-miR-674; mmu-miR-369-3p; mmu-miR-23b; mmu-miR-340-5p; mmu-miR-467f; mmu-miR-466b-3p; mmu-miR-741; mmu-miR-141; mmu-miR-466c-3p; mmu-miR-1196; mmu-miR-335-3p; mmu-miR-1198-5p; mmu-miR-329; mmu-miR-142-5p; mmu-miR-297a; mmu-miR-23a
ADAL	6.73	33	4.90342	mmu-miR-195; mmu-miR-200a; mmu-miR-350; mmu-miR-467e; mmu-miR-495; mmu-miR-429; mmu-miR-713; mmu-miR-374; mmu-miR-16; mmu-miR-125a-5p; mmu-miR-200b; mmu-miR-669d; mmu-miR-125b-5p; mmu-miR-762; mmu-miR-296-5p; mmu-miR-291b-3p; mmu-miR-141; mmu-miR-155; mmu-miR-669f-3p; mmu-miR-132; mmu-miR-15a; mmu-miR-1198-5p; mmu-miR-467h; mmu-miR-541; mmu-miR-376b; mmu-miR-103; mmu-miR-1983; mmu-miR-200c; mmu-m…
ADAM10	5.101	67	13.1347	mmu-miR-145; mmu-miR-804; mmu-miR-93; mmu-miR-466g; mmu-miR-20a; mmu-miR-30d; mmu-miR-323-3p; mmu-miR-30a; mmu-miR-290-3p; mmu-miR-155; mmu-miR-367; mmu-miR-106a; mmu-miR-17; mmu-miR-292-3p; mmu-miR-154; mmu-miR-302a; mmu-miR-302d; mmu-miR-148b; mmu-miR-136; mmu-miR-1198-3p; mmu-miR-148a; mmu-miR-20b; mmu-miR-295; mmu-miR-23b; mmu-miR-34c; mmu-miR-152; mmu-miR-335-3p; mmu-miR-1224; mmu-miR-297a; …
ADAM11	5.876	41	6.97754	mmu-miR-467e; mmu-miR-713; mmu-miR-466g; mmu-miR-19a; mmu-miR-674; mmu-miR-30d; mmu-miR-296-5p; mmu-miR-30a; mmu-miR-181a; mmu-miR-34a; mmu-miR-126-3p; mmu-miR-27a; mmu-miR-30b; mmu-miR-467h; mmu-miR-202-3p; mmu-miR-421; mmu-miR-19b; mmu-miR-423-5p; mmu-miR-297c; mmu-miR-136; mmu-miR-872; mmu-miR-125a-5p; mmu-miR-669d; mmu-miR-484; mmu-miR-18b; mmu-miR-125b-5p; mmu-miR-23b; mmu-miR-762; mmu-miR-3…
ADAM15	10.246	46	4.48956	mmu-miR-713; mmu-miR-96; mmu-miR-150; mmu-miR-674; mmu-miR-296-5p; mmu-miR-28; mmu-miR-181a; mmu-let-7a; mmu-miR-34a; mmu-miR-27a; mmu-miR-541; mmu-miR-1983; mmu-miR-182; mmu-miR-129-2-3p; mmu-miR-1952; mmu-miR-129-1-3p; mmu-let-7g; mmu-miR-195; mmu-miR-148b; mmu-miR-1960; mmu-miR-136; mmu-miR-125a-5p; mmu-miR-16; mmu-miR-148a; mmu-miR-484; mmu-miR-720; mmu-miR-125b-5p; mmu-miR-23b; mmu-miR-762; …
ADAM17	14.495	78	5.38117	mmu-miR-145; mmu-miR-495; mmu-miR-335-5p; mmu-miR-713; mmu-miR-804; mmu-miR-466g; mmu-miR-467c; mmu-miR-340-5p; mmu-miR-296-5p; mmu-miR-466b-3p; mmu-miR-21; mmu-miR-29c; mmu-miR-290-3p; mmu-miR-669f-3p; mmu-miR-367; mmu-miR-541; mmu-miR-468; mmu-miR-129-2-3p; mmu-miR-292-3p; mmu-miR-381; mmu-miR-129-1-3p; mmu-miR-302a; mmu-miR-466a-3p; mmu-miR-302d; mmu-miR-433; mmu-miR-124; mmu-miR-148b; mmu-miR…
ADAM19	3.552	67	18.8626	mmu-miR-200a; mmu-miR-29b; mmu-miR-145; mmu-miR-335-5p; mmu-miR-93; mmu-miR-96; mmu-miR-431; mmu-miR-466g; mmu-miR-150; mmu-miR-20a; mmu-miR-30d; mmu-miR-28; mmu-miR-30a; mmu-miR-434-3p; mmu-miR-669o-5p; mmu-miR-29c; mmu-miR-669f-3p; mmu-miR-367; mmu-miR-34a; mmu-miR-27a; mmu-miR-30b; mmu-miR-541; mmu-miR-1983; mmu-miR-182; mmu-miR-106a; mmu-miR-17; mmu-miR-26b; mmu-miR-672; mmu-miR-381; mmu-miR-…
ADAM32	1.998	22	11.011	mmu-miR-195; mmu-miR-302d; mmu-miR-466a-3p; mmu-miR-713; mmu-miR-16; mmu-miR-467c; mmu-miR-674; mmu-miR-295; mmu-miR-467f; mmu-miR-291b-3p; mmu-miR-330; mmu-miR-290-3p; mmu-miR-376a; mmu-miR-467a; mmu-miR-15a; mmu-miR-103; mmu-miR-291a-3p; mmu-miR-1224; mmu-miR-292-3p; mmu-miR-302a; mmu-miR-15b; mmu-miR-294
ADAM33	33.836	65	1.92103	mmu-miR-145; mmu-miR-495; mmu-miR-335-5p; mmu-miR-804; mmu-miR-96; mmu-miR-30d; mmu-miR-30a; mmu-miR-28; mmu-miR-29c; mmu-miR-367; mmu-let-7a; mmu-miR-1893; mmu-miR-541; mmu-miR-672; mmu-let-7g; mmu-miR-195; mmu-miR-669l; mmu-miR-136; mmu-miR-760-5p; mmu-miR-669f-5p; mmu-miR-34c; mmu-miR-330; mmu-miR-1945; mmu-miR-134; mmu-miR-22; mmu-miR-378; mmu-miR-15a; mmu-miR-183; mmu-let-7e; mmu-miR-1224; m…
ADAM9	2.8	38	13.5714	mmu-miR-200a; mmu-miR-495; mmu-miR-93; mmu-miR-20a; mmu-miR-467f; mmu-miR-340-5p; mmu-miR-30d; mmu-miR-30a; mmu-miR-669f-3p; mmu-miR-543; mmu-miR-126-3p; mmu-miR-30b; mmu-miR-106a; mmu-miR-182; mmu-miR-17; mmu-miR-26b; mmu-miR-302a; mmu-miR-302d; mmu-miR-433; mmu-miR-125a-5p; mmu-miR-669d; mmu-miR-20b; mmu-miR-295; mmu-miR-125b-5p; mmu-miR-23b; mmu-miR-741; mmu-miR-101b; mmu-miR-377; mmu-miR-141;…
ADAMTS1	2.862	45	15.7233	mmu-miR-713; mmu-miR-130a; mmu-miR-96; mmu-miR-431; mmu-miR-19a; mmu-miR-130b; mmu-miR-340-5p; mmu-miR-30d; mmu-miR-28; mmu-miR-30a; mmu-miR-181a; mmu-miR-205; mmu-miR-155; mmu-miR-669f-3p; mmu-miR-543; mmu-miR-132; mmu-miR-34a; mmu-miR-1198-5p; mmu-miR-30b; mmu-miR-182; mmu-miR-103; mmu-miR-468; mmu-miR-1952; mmu-miR-19b; mmu-miR-466a-3p; mmu-miR-433; mmu-miR-142-3p; mmu-miR-148b; mmu-miR-1960; …
ADAMTS10	32.18	56	1.74021	mmu-miR-29b; mmu-miR-804; mmu-miR-96; mmu-miR-466g; mmu-miR-19a; mmu-miR-150; mmu-miR-674; mmu-miR-296-5p; mmu-miR-291a-5p; mmu-miR-29c; mmu-miR-290-3p; mmu-miR-205; mmu-miR-291b-5p; mmu-miR-132; mmu-miR-34a; mmu-miR-27a; mmu-miR-467a; mmu-miR-1198-5p; mmu-miR-541; mmu-miR-182; mmu-miR-103; mmu-miR-129-2-3p; mmu-miR-1952; mmu-miR-292-3p; mmu-miR-672; mmu-miR-129-1-3p; mmu-miR-19b; mmu-miR-142-3p;…
ADAMTS14	3.748	28	7.47065	mmu-let-7g; mmu-miR-195; mmu-miR-335-5p; mmu-miR-125a-5p; mmu-miR-16; mmu-miR-1198-3p; mmu-miR-760-5p; mmu-miR-484; mmu-miR-125b-5p; mmu-miR-18b; mmu-miR-23b; mmu-miR-762; mmu-let-7c; mmu-miR-330; mmu-let-7a; mmu-miR-378; mmu-miR-15a; mmu-let-7e; mmu-miR-468; mmu-miR-202-3p; mmu-miR-1224; mmu-miR-421; mmu-miR-672; mmu-miR-1935; mmu-miR-23a; mmu-miR-15b; mmu-miR-292-5p; mmu-miR-423-5p
ADAMTS15	3.635	60	16.5062	mmu-miR-200a; mmu-miR-29b; mmu-miR-467e; mmu-miR-804; mmu-miR-93; mmu-miR-150; mmu-miR-674; mmu-miR-20a; mmu-miR-467f; mmu-miR-28; mmu-miR-669o-5p; mmu-miR-29c; mmu-miR-290-3p; mmu-miR-669f-3p; mmu-let-7a; mmu-miR-132; mmu-miR-34a; mmu-miR-27a; mmu-miR-467a; mmu-miR-467h; mmu-miR-541; mmu-miR-103; mmu-miR-106a; mmu-miR-1983; mmu-miR-17; mmu-miR-202-3p; mmu-miR-1952; mmu-miR-292-3p; mmu-miR-466a-3…
ADAMTS16	5.846	74	12.6582	mmu-miR-145; mmu-miR-713; mmu-miR-96; mmu-miR-431; mmu-miR-466g; mmu-miR-19a; mmu-miR-340-5p; mmu-miR-296-5p; mmu-miR-323-3p; mmu-miR-29c; mmu-miR-367; mmu-let-7a; mmu-miR-541; mmu-miR-202-3p; mmu-miR-672; mmu-miR-381; mmu-miR-466a-3p; mmu-let-7g; mmu-miR-195; mmu-miR-148b; mmu-miR-669l; mmu-miR-125a-5p; mmu-miR-760-5p; mmu-miR-148a; mmu-miR-669f-5p; mmu-miR-125b-5p; mmu-miR-377; mmu-miR-34c; mmu…
ADAMTS17	5.76	49	8.50694	mmu-miR-200a; mmu-miR-29b; mmu-miR-467e; mmu-miR-713; mmu-miR-804; mmu-miR-431; mmu-miR-150; mmu-miR-674; mmu-miR-29c; mmu-miR-205; mmu-miR-669f-3p; mmu-miR-669o-3p; mmu-miR-34a; mmu-miR-1198-5p; mmu-miR-467h; mmu-miR-26b; mmu-miR-1952; mmu-miR-421; mmu-miR-423-5p; mmu-miR-669a-3p; mmu-miR-466a-3p; mmu-miR-148b; mmu-miR-1960; mmu-miR-125a-5p; mmu-miR-148a; mmu-miR-669d; mmu-miR-484; mmu-miR-125b-…
ADAMTS18	1.959	54	27.5651	mmu-miR-29b; mmu-miR-335-5p; mmu-miR-804; mmu-miR-93; mmu-miR-130a; mmu-miR-96; mmu-miR-466g; mmu-miR-19a; mmu-miR-130b; mmu-miR-674; mmu-miR-20a; mmu-miR-340-5p; mmu-miR-291a-5p; mmu-miR-434-3p; mmu-miR-181a; mmu-miR-155; mmu-miR-205; mmu-miR-29c; mmu-miR-291b-5p; mmu-miR-27a; mmu-miR-1198-5p; mmu-miR-182; mmu-miR-106a; mmu-miR-17; mmu-miR-26b; mmu-miR-381; mmu-miR-421; mmu-miR-672; mmu-miR-302a…
ADAMTS19	1.142	35	30.648	mmu-miR-29b; mmu-miR-495; mmu-miR-804; mmu-miR-431; mmu-miR-150; mmu-miR-369-3p; mmu-miR-340-5p; mmu-miR-291a-5p; mmu-miR-181a; mmu-miR-29c; mmu-miR-291b-5p; mmu-miR-27a; mmu-miR-103; mmu-miR-26b; mmu-miR-672; mmu-miR-466a-3p; mmu-miR-142-3p; mmu-miR-148b; mmu-miR-1960; mmu-miR-297c; mmu-miR-374; mmu-miR-148a; mmu-miR-484; mmu-miR-376c; mmu-miR-101b; mmu-miR-291b-3p; mmu-miR-152; mmu-miR-29a; mmu…
ADAMTS2	4.005	54	13.4831	mmu-miR-29b; mmu-miR-713; mmu-miR-93; mmu-miR-130a; mmu-miR-96; mmu-miR-431; mmu-miR-466g; mmu-miR-130b; mmu-miR-20a; mmu-miR-296-5p; mmu-miR-466b-3p; mmu-miR-669o-5p; mmu-miR-181a; mmu-miR-29c; mmu-miR-669f-3p; mmu-miR-191; mmu-miR-103; mmu-miR-106a; mmu-miR-1983; mmu-miR-17; mmu-miR-129-2-3p; mmu-miR-202-3p; mmu-miR-1952; mmu-miR-381; mmu-miR-421; mmu-miR-672; mmu-miR-129-1-3p; mmu-miR-423-5p; …
ADAMTS20	5.338	88	16.4856	mmu-miR-145; mmu-miR-495; mmu-miR-466g; mmu-miR-19a; mmu-miR-340-5p; mmu-miR-323-3p; mmu-miR-21; mmu-miR-29c; mmu-miR-669f-3p; mmu-miR-367; mmu-let-7a; mmu-miR-468; mmu-miR-202-3p; mmu-miR-672; mmu-miR-669a-3p; mmu-miR-466a-3p; mmu-let-7g; mmu-miR-433; mmu-miR-148b; mmu-miR-669l; mmu-miR-136; mmu-miR-125a-5p; mmu-miR-760-5p; mmu-miR-1198-3p; mmu-miR-148a; mmu-miR-669f-5p; mmu-miR-720; mmu-miR-23b…
ADAMTS3	8.172	70	8.56583	mmu-miR-335-5p; mmu-miR-713; mmu-miR-93; mmu-miR-431; mmu-miR-19a; mmu-miR-20a; mmu-miR-340-5p; mmu-miR-466b-3p; mmu-miR-30d; mmu-miR-30a; mmu-miR-21; mmu-miR-29c; mmu-miR-669f-3p; mmu-miR-106a; mmu-miR-17; mmu-miR-202-3p; mmu-miR-154; mmu-miR-381; mmu-miR-672; mmu-miR-466a-3p; mmu-miR-195; mmu-miR-124; mmu-miR-136; mmu-miR-125a-5p; mmu-miR-1198-3p; mmu-miR-20b; mmu-miR-125b-5p; mmu-miR-466c-3p; …
ADAMTS5	5.008	86	17.1725	mmu-miR-145; mmu-miR-495; mmu-miR-713; mmu-miR-93; mmu-miR-466g; mmu-miR-467c; mmu-miR-20a; mmu-miR-340-5p; mmu-miR-466b-3p; mmu-miR-434-3p; mmu-miR-21; mmu-miR-290-3p; mmu-miR-669f-3p; mmu-miR-367; mmu-let-7a; mmu-miR-191; mmu-miR-468; mmu-miR-106a; mmu-miR-17; mmu-miR-154; mmu-miR-292-3p; mmu-miR-381; mmu-miR-302a; mmu-miR-466a-3p; mmu-miR-302d; mmu-let-7g; mmu-miR-195; mmu-miR-433; mmu-miR-148…
ADAMTS7	6.961	45	6.46459	mmu-miR-200a; mmu-miR-145; mmu-miR-29b; mmu-miR-495; mmu-miR-335-5p; mmu-miR-713; mmu-miR-130a; mmu-miR-466g; mmu-miR-19a; mmu-miR-130b; mmu-miR-150; mmu-miR-674; mmu-miR-296-5p; mmu-miR-29c; mmu-miR-34a; mmu-miR-27a; mmu-miR-26b; mmu-miR-1952; mmu-miR-421; mmu-miR-19b; mmu-miR-142-3p; mmu-miR-350; mmu-miR-148b; mmu-miR-136; mmu-miR-125a-5p; mmu-miR-760-5p; mmu-miR-1198-3p; mmu-miR-148a; mmu-miR-…
ADAMTS8	5.388	66	12.2494	mmu-miR-145; mmu-miR-495; mmu-miR-335-5p; mmu-miR-713; mmu-miR-804; mmu-miR-431; mmu-miR-467c; mmu-miR-296-5p; mmu-miR-28; mmu-miR-434-3p; mmu-miR-29c; mmu-miR-290-3p; mmu-let-7a; mmu-miR-129-2-3p; mmu-miR-202-3p; mmu-miR-672; mmu-miR-292-3p; mmu-miR-129-1-3p; mmu-miR-302a; mmu-miR-302d; mmu-let-7g; mmu-miR-195; mmu-miR-136; mmu-miR-295; mmu-miR-23b; mmu-miR-377; mmu-miR-34c; mmu-miR-330; mmu-miR…
ADAMTS9	7.959	80	10.0515	mmu-miR-495; mmu-miR-335-5p; mmu-miR-713; mmu-miR-96; mmu-miR-431; mmu-miR-19a; mmu-miR-340-5p; mmu-miR-30d; mmu-miR-28; mmu-miR-30a; mmu-miR-434-3p; mmu-miR-29c; mmu-miR-155; mmu-miR-669f-3p; mmu-let-7a; mmu-miR-191; mmu-miR-129-2-3p; mmu-miR-202-3p; mmu-miR-129-1-3p; mmu-miR-302a; mmu-miR-302d; mmu-let-7g; mmu-miR-124; mmu-miR-669l; mmu-miR-136; mmu-miR-760-5p; mmu-miR-669f-5p; mmu-miR-295; mmu…
ADAMTSL1	8.632	66	7.64597	mmu-miR-200a; mmu-miR-467e; mmu-miR-145; mmu-miR-713; mmu-miR-804; mmu-miR-96; mmu-miR-431; mmu-miR-466g; mmu-miR-150; mmu-miR-674; mmu-miR-467f; mmu-miR-340-5p; mmu-miR-296-5p; mmu-miR-323-3p; mmu-miR-181a; mmu-miR-205; mmu-miR-132; mmu-miR-669f-3p; mmu-miR-367; mmu-miR-1893; mmu-miR-27a; mmu-miR-1198-5p; mmu-miR-467h; mmu-miR-182; mmu-miR-129-2-3p; mmu-miR-1952; mmu-miR-381; mmu-miR-129-1-3p; m…
ADAMTSL3	4.118	55	13.356	mmu-miR-495; mmu-miR-804; mmu-miR-200b; mmu-miR-19a; mmu-miR-340-5p; mmu-miR-291a-5p; mmu-miR-434-3p; mmu-miR-669o-5p; mmu-miR-669f-3p; mmu-miR-367; mmu-miR-291b-5p; mmu-let-7a; mmu-miR-27a; mmu-miR-1198-5p; mmu-miR-468; mmu-miR-103; mmu-miR-129-2-3p; mmu-miR-154; mmu-miR-1952; mmu-miR-381; mmu-miR-421; mmu-miR-672; mmu-miR-129-1-3p; mmu-miR-19b; mmu-let-7g; mmu-miR-195; mmu-miR-32; mmu-miR-142-3…
ADAMTSL4	2.844	22	7.73558	mmu-let-7g; mmu-miR-200a; mmu-miR-124; mmu-miR-669l; mmu-miR-335-5p; mmu-miR-669f-5p; mmu-miR-150; mmu-let-7c; mmu-miR-151-5p; mmu-miR-141; mmu-miR-669o-5p; mmu-miR-330; mmu-miR-34c; mmu-miR-335-3p; mmu-let-7a; mmu-miR-34a; mmu-miR-669a-5p; mmu-miR-378; mmu-let-7e; mmu-miR-329; mmu-miR-33; mmu-miR-410
ADAMTSL5	20.476	82	4.00469	mmu-miR-335-5p; mmu-miR-713; mmu-miR-93; mmu-miR-431; mmu-miR-466g; mmu-miR-467c; mmu-miR-20a; mmu-miR-296-5p; mmu-miR-466b-3p; mmu-miR-30d; mmu-miR-30a; mmu-miR-29c; mmu-miR-669f-3p; mmu-let-7a; mmu-miR-1893; mmu-miR-191; mmu-miR-541; mmu-miR-106a; mmu-miR-17; mmu-miR-202-3p; mmu-miR-672; mmu-miR-302a; mmu-miR-669a-3p; mmu-miR-466a-3p; mmu-miR-302d; mmu-let-7g; mmu-miR-195; mmu-miR-124; mmu-miR-…
ADAP1	7.463	38	5.09179	mmu-miR-29b; mmu-miR-96; mmu-miR-150; mmu-miR-296-5p; mmu-miR-434-3p; mmu-miR-29c; mmu-miR-205; mmu-miR-34a; mmu-miR-27a; mmu-miR-1983; mmu-miR-103; mmu-miR-26b; mmu-miR-672; mmu-miR-1952; mmu-miR-423-5p; mmu-miR-195; mmu-miR-433; mmu-miR-148b; mmu-miR-136; mmu-miR-125a-5p; mmu-miR-16; mmu-miR-760-5p; mmu-miR-148a; mmu-miR-125b-5p; mmu-miR-18b; mmu-miR-762; mmu-miR-152; mmu-miR-34c; mmu-miR-127; …
ADAP2	3.843	68	17.6945	mmu-miR-495; mmu-miR-335-5p; mmu-miR-804; mmu-miR-431; mmu-miR-466g; mmu-miR-340-5p; mmu-miR-466b-3p; mmu-miR-434-3p; mmu-miR-155; mmu-miR-669f-3p; mmu-let-7a; mmu-miR-129-2-3p; mmu-miR-202-3p; mmu-miR-381; mmu-miR-129-1-3p; mmu-miR-466a-3p; mmu-let-7g; mmu-miR-433; mmu-miR-669l; mmu-miR-136; mmu-miR-125a-5p; mmu-miR-669f-5p; mmu-miR-720; mmu-miR-125b-5p; mmu-miR-377; mmu-miR-466c-3p; mmu-miR-330…
ADAR	12.59	30	2.38284	mmu-miR-148b; mmu-miR-297c; mmu-miR-350; mmu-miR-125a-5p; mmu-miR-148a; mmu-miR-466g; mmu-miR-669d; mmu-miR-19a; mmu-miR-125b-5p; mmu-miR-30d; mmu-miR-291a-5p; mmu-miR-30a; mmu-miR-34c; mmu-miR-330; mmu-miR-152; mmu-miR-760-3p; mmu-miR-291b-5p; mmu-miR-34a; mmu-miR-1198-5p; mmu-miR-30b; mmu-miR-193b; mmu-miR-532-5p; mmu-miR-1983; mmu-miR-103; mmu-miR-376b; mmu-miR-1224; mmu-miR-297a; mmu-miR-1935…
ADARB1	35.762	99	2.7683	mmu-miR-145; mmu-miR-495; mmu-miR-335-5p; mmu-miR-713; mmu-miR-93; mmu-miR-467c; mmu-miR-19a; mmu-miR-20a; mmu-miR-340-5p; mmu-miR-296-5p; mmu-miR-30d; mmu-miR-466b-3p; mmu-miR-28; mmu-miR-30a; mmu-miR-290-3p; mmu-miR-669f-3p; mmu-miR-541; mmu-miR-106a; mmu-miR-468; mmu-miR-129-2-3p; mmu-miR-17; mmu-miR-292-3p; mmu-miR-129-1-3p; mmu-miR-302a; mmu-miR-466a-3p; mmu-miR-302d; mmu-miR-195; mmu-miR-12…
ADARB2	1.946	44	22.6105	mmu-miR-335-5p; mmu-miR-93; mmu-miR-130a; mmu-miR-431; mmu-miR-466g; mmu-miR-130b; mmu-miR-20a; mmu-miR-467f; mmu-miR-30d; mmu-miR-466b-3p; mmu-miR-30a; mmu-miR-669o-5p; mmu-miR-205; mmu-miR-669f-3p; mmu-miR-669o-3p; mmu-miR-27a; mmu-miR-30b; mmu-miR-106a; mmu-miR-17; mmu-miR-1952; mmu-miR-302a; mmu-miR-669a-3p; mmu-miR-195; mmu-miR-302d; mmu-miR-433; mmu-miR-136; mmu-miR-16; mmu-miR-484; mmu-miR…
ADAT1	4.291	38	8.85574	mmu-miR-200a; mmu-miR-335-5p; mmu-miR-804; mmu-miR-466g; mmu-miR-674; mmu-miR-369-3p; mmu-miR-340-5p; mmu-miR-205; mmu-miR-34a; mmu-miR-1198-5p; mmu-miR-103; mmu-miR-1983; mmu-miR-129-2-3p; mmu-miR-26b; mmu-miR-672; mmu-miR-129-1-3p; mmu-miR-433; mmu-miR-124; mmu-miR-1960; mmu-miR-297c; mmu-miR-872; mmu-miR-374; mmu-miR-484; mmu-miR-23b; mmu-miR-141; mmu-miR-330; mmu-miR-34c; mmu-miR-335-3p; mmu-…
ADAT2	0.562	7	12.4555	mmu-miR-330; mmu-miR-329; mmu-miR-23b; mmu-miR-713; mmu-miR-27a; mmu-miR-23a; mmu-miR-466g
ADC	6.023	41	6.80724	mmu-miR-29b; mmu-miR-96; mmu-miR-466g; mmu-miR-467c; mmu-miR-19a; mmu-miR-150; mmu-miR-30d; mmu-miR-30a; mmu-miR-29c; mmu-miR-34a; mmu-miR-30b; mmu-miR-103; mmu-miR-26b; mmu-miR-1952; mmu-miR-302a; mmu-miR-19b; mmu-miR-302d; mmu-miR-350; mmu-miR-669l; mmu-miR-760-5p; mmu-miR-669f-5p; mmu-miR-484; mmu-miR-295; mmu-miR-762; mmu-miR-151-5p; mmu-miR-1945; mmu-miR-330; mmu-miR-34c; mmu-miR-127; mmu-mi…
ADCK1	1.41	20	14.1844	mmu-miR-466a-3p; mmu-miR-200a; mmu-miR-433; mmu-miR-1198-3p; mmu-miR-669d; mmu-miR-674; mmu-miR-340-5p; mmu-miR-23b; mmu-miR-141; mmu-miR-330; mmu-miR-669f-3p; mmu-miR-27a; mmu-miR-183; mmu-miR-541; mmu-miR-381; mmu-miR-672; mmu-miR-142-5p; mmu-miR-1935; mmu-miR-23a; mmu-miR-410
ADCK4	2.445	14	5.72597	mmu-miR-34c; mmu-miR-205; mmu-miR-34a; mmu-miR-136; mmu-miR-1198-3p; mmu-miR-193b; mmu-miR-532-5p; mmu-miR-1983; mmu-miR-1224; mmu-miR-23b; mmu-miR-23a; mmu-miR-292-5p; mmu-miR-28; mmu-miR-423-5p
ADCY2	0.83	24	28.9157	mmu-miR-148b; mmu-miR-350; mmu-miR-429; mmu-miR-93; mmu-miR-130a; mmu-miR-200b; mmu-miR-148a; mmu-miR-467c; mmu-miR-20b; mmu-miR-130b; mmu-miR-20a; mmu-miR-467f; mmu-miR-28; mmu-miR-152; mmu-miR-21; mmu-miR-669f-3p; mmu-miR-301a; mmu-miR-106b; mmu-miR-541; mmu-miR-1983; mmu-miR-106a; mmu-miR-17; mmu-miR-200c; mmu-miR-1224
ADCY3	3.68	20	5.43478	mmu-miR-32; mmu-miR-350; mmu-miR-335-5p; mmu-miR-125a-5p; mmu-miR-760-5p; mmu-miR-484; mmu-miR-363-3p; mmu-miR-674; mmu-miR-18b; mmu-miR-125b-5p; mmu-miR-434-3p; mmu-miR-34c; mmu-miR-760-3p; mmu-miR-132; mmu-miR-367; mmu-miR-34a; mmu-miR-382; mmu-miR-27a; mmu-miR-532-5p; mmu-miR-25
ADCY4	0.46	2	4.34783	mmu-miR-1224; mmu-miR-423-3p
ADCY5	2.125	41	19.2941	mmu-miR-29b; mmu-miR-467e; mmu-miR-335-5p; mmu-miR-713; mmu-miR-150; mmu-miR-369-3p; mmu-miR-29c; mmu-miR-543; mmu-miR-132; mmu-miR-34a; mmu-miR-1198-5p; mmu-miR-467h; mmu-miR-26b; mmu-miR-672; mmu-miR-421; mmu-miR-1952; mmu-miR-423-5p; mmu-miR-195; mmu-miR-148b; mmu-miR-136; mmu-miR-125a-5p; mmu-miR-16; mmu-miR-760-5p; mmu-miR-148a; mmu-miR-669d; mmu-miR-125b-5p; mmu-miR-18b; mmu-miR-762; mmu-mi…
ADCY8	0.579	14	24.1796	mmu-miR-152; mmu-miR-148b; mmu-miR-1960; mmu-miR-205; mmu-miR-760-3p; mmu-miR-27a; mmu-miR-148a; mmu-miR-183; mmu-miR-484; mmu-miR-674; mmu-miR-23b; mmu-miR-23a; mmu-miR-410; mmu-miR-741
ADCY9	20.439	80	3.91409	mmu-miR-145; mmu-miR-495; mmu-miR-335-5p; mmu-miR-713; mmu-miR-96; mmu-miR-431; mmu-miR-466g; mmu-miR-19a; mmu-miR-296-5p; mmu-miR-466b-3p; mmu-miR-434-3p; mmu-miR-155; mmu-miR-669f-3p; mmu-let-7a; mmu-miR-191; mmu-miR-202-3p; mmu-miR-669a-3p; mmu-miR-466a-3p; mmu-let-7g; mmu-miR-195; mmu-miR-124; mmu-miR-136; mmu-miR-125a-5p; mmu-miR-760-5p; mmu-miR-1198-3p; mmu-miR-125b-5p; mmu-miR-377; mmu-miR…
ADCYAP1R1	13.407	63	4.69904	mmu-miR-200a; mmu-miR-29b; mmu-miR-335-5p; mmu-miR-713; mmu-miR-93; mmu-miR-130a; mmu-miR-431; mmu-miR-466g; mmu-miR-19a; mmu-miR-130b; mmu-miR-20a; mmu-miR-674; mmu-miR-296-5p; mmu-miR-466b-3p; mmu-miR-291a-5p; mmu-miR-28; mmu-miR-205; mmu-miR-29c; mmu-miR-291b-5p; mmu-miR-669f-3p; mmu-miR-27a; mmu-miR-541; mmu-miR-106a; mmu-miR-1983; mmu-miR-17; mmu-miR-129-2-3p; mmu-miR-154; mmu-miR-1952; mmu-…
ADD1	11.084	29	2.61638	mmu-miR-302d; mmu-miR-466a-3p; mmu-miR-124; mmu-miR-148b; mmu-miR-335-5p; mmu-miR-804; mmu-miR-130a; mmu-miR-148a; mmu-miR-484; mmu-miR-130b; mmu-miR-295; mmu-miR-467f; mmu-miR-34c; mmu-miR-152; mmu-miR-760-3p; mmu-miR-134; mmu-miR-34a; mmu-miR-27a; mmu-miR-301a; mmu-miR-532-5p; mmu-miR-103; mmu-miR-291a-3p; mmu-miR-129-2-3p; mmu-miR-33; mmu-miR-1935; mmu-miR-129-1-3p; mmu-miR-302a; mmu-miR-294; …
ADD3	7.206	40	5.55093	mmu-miR-145; mmu-miR-467e; mmu-miR-96; mmu-miR-19a; mmu-miR-150; mmu-miR-674; mmu-miR-467f; mmu-miR-340-5p; mmu-miR-466b-3p; mmu-miR-323-3p; mmu-miR-21; mmu-miR-155; mmu-miR-669f-3p; mmu-miR-543; mmu-miR-669o-3p; mmu-miR-27a; mmu-miR-1198-5p; mmu-miR-467h; mmu-miR-182; mmu-miR-1952; mmu-miR-381; mmu-miR-19b; mmu-miR-466a-3p; mmu-miR-669a-3p; mmu-miR-433; mmu-miR-350; mmu-miR-669l; mmu-miR-136; mm…
ADH5	0.415	8	19.2771	mmu-miR-195; mmu-miR-433; mmu-miR-205; mmu-miR-467f; mmu-miR-15a; mmu-miR-15b; mmu-miR-16; mmu-miR-377
ADHFE1	3.004	43	14.3142	mmu-miR-200a; mmu-miR-29b; mmu-miR-467e; mmu-miR-335-5p; mmu-miR-804; mmu-miR-96; mmu-miR-200b; mmu-miR-19a; mmu-miR-369-3p; mmu-miR-181a; mmu-miR-29c; mmu-miR-155; mmu-miR-669f-3p; mmu-miR-543; mmu-let-7a; mmu-miR-34a; mmu-miR-467h; mmu-miR-182; mmu-miR-468; mmu-miR-202-3p; mmu-miR-19b; mmu-let-7g; mmu-miR-148b; mmu-miR-429; mmu-miR-125a-5p; mmu-miR-148a; mmu-miR-669d; mmu-miR-125b-5p; mmu-miR-2…
ADIPOR1	3.644	40	10.9769	mmu-miR-200a; mmu-miR-145; mmu-miR-29b; mmu-miR-19a; mmu-miR-323-3p; mmu-miR-669o-5p; mmu-miR-29c; mmu-miR-669f-3p; mmu-miR-132; mmu-miR-34a; mmu-miR-191; mmu-miR-154; mmu-miR-1952; mmu-miR-423-5p; mmu-miR-19b; mmu-miR-195; mmu-miR-466a-3p; mmu-miR-142-3p; mmu-miR-669l; mmu-miR-872; mmu-miR-125a-5p; mmu-miR-16; mmu-miR-374; mmu-miR-760-5p; mmu-miR-669f-5p; mmu-miR-484; mmu-miR-125b-5p; mmu-miR-37…
ADIPOR2	5.622	60	10.6724	mmu-miR-200a; mmu-miR-93; mmu-miR-200b; mmu-miR-431; mmu-miR-19a; mmu-miR-150; mmu-miR-20a; mmu-miR-28; mmu-miR-323-3p; mmu-miR-434-3p; mmu-miR-669o-5p; mmu-miR-205; mmu-let-7a; mmu-miR-132; mmu-miR-669o-3p; mmu-miR-34a; mmu-miR-27a; mmu-miR-106a; mmu-miR-129-2-3p; mmu-miR-17; mmu-miR-202-3p; mmu-miR-129-1-3p; mmu-miR-302a; mmu-miR-19b; mmu-miR-669a-3p; mmu-miR-302d; mmu-let-7g; mmu-miR-195; mmu-…
ADK	0.755	19	25.1656	mmu-miR-32; mmu-miR-495; mmu-miR-429; mmu-miR-713; mmu-miR-200b; mmu-miR-872; mmu-miR-363-3p; mmu-miR-674; mmu-miR-291a-5p; mmu-miR-21; mmu-miR-291b-5p; mmu-miR-367; mmu-miR-22; mmu-miR-183; mmu-miR-25; mmu-miR-200c; mmu-miR-33; mmu-miR-1952; mmu-miR-410
ADM	0.958	13	13.5699	mmu-miR-32; mmu-miR-181a; mmu-miR-34c; mmu-miR-495; mmu-miR-367; mmu-miR-34a; mmu-miR-25; mmu-miR-363-3p; mmu-miR-329; mmu-miR-26b; mmu-miR-1952; mmu-miR-26a; mmu-miR-410
ADM2	0.757	8	10.568	mmu-miR-376b; mmu-miR-330; mmu-miR-125b-5p; mmu-miR-22; mmu-miR-378; mmu-miR-125a-5p; mmu-miR-872; mmu-miR-28
ADNP2	4.678	86	18.3839	mmu-miR-145; mmu-miR-495; mmu-miR-335-5p; mmu-miR-713; mmu-miR-804; mmu-miR-93; mmu-miR-96; mmu-miR-467c; mmu-miR-20a; mmu-miR-296-5p; mmu-miR-30d; mmu-miR-28; mmu-miR-30a; mmu-miR-323-3p; mmu-miR-21; mmu-miR-155; mmu-miR-290-3p; mmu-miR-106a; mmu-miR-468; mmu-miR-17; mmu-miR-292-3p; mmu-miR-672; mmu-miR-302a; mmu-miR-302d; mmu-miR-433; mmu-miR-124; mmu-miR-669l; mmu-miR-125a-5p; mmu-miR-669f-5p;…
ADO	5.111	64	12.522	mmu-miR-495; mmu-miR-335-5p; mmu-miR-713; mmu-miR-804; mmu-miR-466b-3p; mmu-miR-30d; mmu-miR-28; mmu-miR-323-3p; mmu-miR-30a; mmu-miR-669f-3p; mmu-miR-367; mmu-miR-1893; mmu-miR-541; mmu-miR-468; mmu-miR-129-2-3p; mmu-miR-672; mmu-miR-129-1-3p; mmu-miR-466a-3p; mmu-miR-195; mmu-miR-136; mmu-miR-466c-3p; mmu-miR-34c; mmu-miR-22; mmu-miR-15a; mmu-miR-329; mmu-miR-200c; mmu-miR-297a; mmu-miR-410; mm…
ADORA2A	1.762	29	16.4586	mmu-miR-142-3p; mmu-miR-148b; mmu-miR-1960; mmu-miR-495; mmu-miR-136; mmu-miR-125a-5p; mmu-miR-148a; mmu-miR-760-5p; mmu-miR-669d; mmu-miR-125b-5p; mmu-miR-23b; mmu-miR-296-5p; mmu-miR-152; mmu-miR-290-3p; mmu-miR-127; mmu-miR-760-3p; mmu-miR-134; mmu-miR-382; mmu-miR-467a; mmu-miR-99b; mmu-miR-191; mmu-miR-376b; mmu-miR-129-2-3p; mmu-miR-1952; mmu-miR-292-3p; mmu-miR-129-1-3p; mmu-miR-23a; mmu-m…
ADORA2B	1.392	21	15.0862	mmu-miR-145; mmu-miR-669l; mmu-miR-429; mmu-miR-713; mmu-miR-200b; mmu-miR-374; mmu-miR-669d; mmu-miR-669f-5p; mmu-miR-720; mmu-miR-762; mmu-miR-323-3p; mmu-miR-377; mmu-miR-181a; mmu-miR-669o-5p; mmu-miR-22; mmu-miR-669a-5p; mmu-miR-27a; mmu-miR-329; mmu-miR-200c; mmu-miR-1935; mmu-miR-292-5p
ADPGK	1.471	17	11.5568	mmu-miR-466a-3p; mmu-miR-200a; mmu-miR-433; mmu-miR-145; mmu-miR-669d; mmu-miR-150; mmu-miR-674; mmu-miR-340-5p; mmu-miR-377; mmu-miR-141; mmu-miR-291b-3p; mmu-miR-760-3p; mmu-miR-669f-3p; mmu-miR-1198-5p; mmu-miR-468; mmu-miR-329; mmu-miR-1952
ADPRH	0.706	10	14.1643	mmu-miR-205; mmu-miR-495; mmu-miR-760-3p; mmu-miR-541; mmu-miR-154; mmu-miR-1952; mmu-miR-381; mmu-miR-672; mmu-miR-292-5p; mmu-miR-377
ADPRHL2	7.455	28	3.75587	mmu-miR-302d; mmu-miR-124; mmu-miR-350; mmu-miR-484; mmu-miR-150; mmu-miR-295; mmu-miR-340-5p; mmu-miR-18b; mmu-miR-296-5p; mmu-miR-762; mmu-miR-34c; mmu-miR-330; mmu-miR-760-3p; mmu-miR-132; mmu-miR-22; mmu-miR-376a; mmu-miR-34a; mmu-miR-183; mmu-miR-103; mmu-miR-376b; mmu-miR-291a-3p; mmu-miR-1224; mmu-miR-142-5p; mmu-miR-1935; mmu-miR-302a; mmu-miR-294; mmu-miR-423-5p; mmu-miR-466f
ADRA1A	13.389	56	4.18254	mmu-miR-145; mmu-miR-495; mmu-miR-335-5p; mmu-miR-93; mmu-miR-96; mmu-miR-431; mmu-miR-150; mmu-miR-674; mmu-miR-20a; mmu-miR-340-5p; mmu-miR-291a-5p; mmu-miR-434-3p; mmu-miR-669o-5p; mmu-miR-21; mmu-miR-205; mmu-miR-132; mmu-miR-543; mmu-miR-291b-5p; mmu-miR-34a; mmu-miR-669o-3p; mmu-miR-191; mmu-miR-541; mmu-miR-182; mmu-miR-106a; mmu-miR-17; mmu-miR-129-2-3p; mmu-miR-421; mmu-miR-672; mmu-miR-…
ADRA1D	1.145	19	16.5939	mmu-miR-195; mmu-miR-297c; mmu-miR-16; mmu-miR-340-5p; mmu-miR-762; mmu-miR-377; mmu-miR-28; mmu-miR-34c; mmu-miR-1893; mmu-miR-34a; mmu-miR-15a; mmu-miR-378; mmu-miR-183; mmu-miR-541; mmu-miR-672; mmu-miR-142-5p; mmu-miR-297a; mmu-miR-1935; mmu-miR-15b
ADRA2A	3.801	59	15.5222	mmu-miR-200a; mmu-miR-495; mmu-miR-335-5p; mmu-miR-713; mmu-miR-804; mmu-miR-93; mmu-miR-96; mmu-miR-200b; mmu-miR-431; mmu-miR-19a; mmu-miR-150; mmu-miR-20a; mmu-miR-674; mmu-miR-467f; mmu-miR-296-5p; mmu-miR-30d; mmu-miR-466b-3p; mmu-miR-291a-5p; mmu-miR-28; mmu-miR-30a; mmu-miR-669o-5p; mmu-miR-291b-5p; mmu-miR-1893; mmu-miR-191; mmu-miR-30b; mmu-miR-1983; mmu-miR-106a; mmu-miR-182; mmu-miR-17…
ADRB1	2.491	39	15.6564	mmu-miR-200a; mmu-miR-29b; mmu-miR-431; mmu-miR-19a; mmu-miR-150; mmu-miR-30d; mmu-miR-30a; mmu-miR-29c; mmu-let-7a; mmu-miR-1893; mmu-miR-30b; mmu-miR-541; mmu-miR-1983; mmu-miR-202-3p; mmu-miR-672; mmu-miR-19b; mmu-miR-466a-3p; mmu-let-7g; mmu-miR-195; mmu-miR-124; mmu-miR-148b; mmu-miR-16; mmu-miR-148a; mmu-miR-484; mmu-miR-18b; mmu-miR-762; mmu-let-7c; mmu-miR-151-5p; mmu-miR-377; mmu-miR-141…
ADRB2	2.143	46	21.4652	mmu-miR-495; mmu-miR-200b; mmu-miR-30d; mmu-miR-30a; mmu-miR-205; mmu-let-7a; mmu-miR-30b; mmu-miR-541; mmu-miR-182; mmu-miR-26b; mmu-miR-202-3p; mmu-miR-672; mmu-miR-381; mmu-miR-1952; mmu-let-7g; mmu-miR-195; mmu-miR-350; mmu-miR-124; mmu-miR-148b; mmu-miR-429; mmu-miR-136; mmu-miR-125a-5p; mmu-miR-16; mmu-miR-760-5p; mmu-miR-148a; mmu-miR-669d; mmu-miR-484; mmu-miR-125b-5p; mmu-let-7c; mmu-miR…
ADRBK2	4.597	67	14.5747	mmu-miR-495; mmu-miR-804; mmu-miR-93; mmu-miR-431; mmu-miR-467c; mmu-miR-19a; mmu-miR-20a; mmu-miR-340-5p; mmu-miR-296-5p; mmu-miR-28; mmu-miR-434-3p; mmu-miR-106a; mmu-miR-17; mmu-miR-129-2-3p; mmu-miR-672; mmu-miR-154; mmu-miR-129-1-3p; mmu-miR-466a-3p; mmu-miR-195; mmu-miR-433; mmu-miR-124; mmu-miR-148b; mmu-miR-125a-5p; mmu-miR-760-5p; mmu-miR-1198-3p; mmu-miR-148a; mmu-miR-20b; mmu-miR-125b-…
ADSL	3.103	41	13.213	mmu-miR-200a; mmu-miR-804; mmu-miR-130a; mmu-miR-96; mmu-miR-466g; mmu-miR-19a; mmu-miR-130b; mmu-miR-434-3p; mmu-miR-205; mmu-miR-34a; mmu-miR-103; mmu-miR-26b; mmu-miR-381; mmu-miR-1952; mmu-miR-302a; mmu-miR-19b; mmu-miR-195; mmu-miR-302d; mmu-miR-142-3p; mmu-miR-148b; mmu-miR-1960; mmu-miR-16; mmu-miR-148a; mmu-miR-669d; mmu-miR-295; mmu-miR-141; mmu-miR-152; mmu-miR-34c; mmu-miR-22; mmu-miR-…
ADSS	3.602	27	7.49584	mmu-miR-29b; mmu-miR-350; mmu-miR-136; mmu-miR-1198-3p; mmu-miR-19a; mmu-miR-150; mmu-miR-23b; mmu-miR-467f; mmu-miR-340-5p; mmu-miR-291a-5p; mmu-miR-377; mmu-miR-434-3p; mmu-miR-1196; mmu-miR-330; mmu-miR-29a; mmu-miR-335-3p; mmu-miR-29c; mmu-miR-291b-5p; mmu-miR-543; mmu-miR-191; mmu-miR-193b; mmu-miR-1983; mmu-miR-33; mmu-miR-381; mmu-miR-292-5p; mmu-miR-23a; mmu-miR-19b
ADSSL1	0.794	5	6.29723	mmu-miR-466a-3p; mmu-miR-330; mmu-miR-376c; mmu-miR-378; mmu-miR-377
AEBP1	1.688	17	10.0711	mmu-miR-145; mmu-miR-669l; mmu-miR-713; mmu-miR-804; mmu-miR-96; mmu-miR-760-5p; mmu-miR-669f-5p; mmu-miR-674; mmu-miR-487b; mmu-miR-669a-5p; mmu-miR-1198-5p; mmu-miR-376b; mmu-miR-129-2-3p; mmu-miR-1952; mmu-miR-129-1-3p; mmu-miR-292-5p; mmu-miR-423-5p
AEBP2	25.539	67	2.62344	mmu-miR-495; mmu-miR-93; mmu-miR-96; mmu-miR-466g; mmu-miR-19a; mmu-miR-20a; mmu-miR-340-5p; mmu-miR-296-5p; mmu-miR-323-3p; mmu-miR-290-3p; mmu-miR-669f-3p; mmu-miR-468; mmu-miR-106a; mmu-miR-17; mmu-miR-154; mmu-miR-672; mmu-miR-292-3p; mmu-miR-302a; mmu-miR-669a-3p; mmu-miR-466a-3p; mmu-miR-302d; mmu-miR-195; mmu-miR-125a-5p; mmu-miR-760-5p; mmu-miR-20b; mmu-miR-295; mmu-miR-720; mmu-miR-125b-…
AEN	12.198	60	4.91884	mmu-miR-200a; mmu-miR-467e; mmu-miR-335-5p; mmu-miR-200b; mmu-miR-466g; mmu-miR-19a; mmu-miR-150; mmu-miR-467f; mmu-miR-296-5p; mmu-miR-30d; mmu-miR-30a; mmu-miR-323-3p; mmu-miR-21; mmu-miR-205; mmu-miR-155; mmu-miR-132; mmu-let-7a; mmu-miR-669f-3p; mmu-miR-543; mmu-miR-34a; mmu-miR-669o-3p; mmu-miR-30b; mmu-miR-467h; mmu-miR-541; mmu-miR-182; mmu-miR-202-3p; mmu-miR-1952; mmu-miR-19b; mmu-miR-42…
AF529169	1.689	27	15.9858	mmu-miR-195; mmu-miR-124; mmu-miR-29b; mmu-miR-495; mmu-miR-713; mmu-miR-96; mmu-miR-16; mmu-miR-374; mmu-miR-431; mmu-miR-466g; mmu-miR-669d; mmu-miR-369-3p; mmu-miR-151-5p; mmu-miR-28; mmu-miR-330; mmu-miR-29c; mmu-miR-29a; mmu-miR-205; mmu-miR-155; mmu-miR-669f-3p; mmu-miR-15a; mmu-miR-378; mmu-miR-382; mmu-miR-103; mmu-miR-129-2-3p; mmu-miR-129-1-3p; mmu-miR-15b
AFAP1L1	7.08	57	8.05085	mmu-miR-200a; mmu-miR-145; mmu-miR-29b; mmu-miR-467e; mmu-miR-713; mmu-miR-130a; mmu-miR-96; mmu-miR-431; mmu-miR-130b; mmu-miR-296-5p; mmu-miR-28; mmu-miR-669o-5p; mmu-miR-181a; mmu-miR-29c; mmu-miR-205; mmu-miR-27a; mmu-miR-467h; mmu-miR-1983; mmu-miR-468; mmu-miR-129-2-3p; mmu-miR-1952; mmu-miR-421; mmu-miR-672; mmu-miR-129-1-3p; mmu-miR-423-5p; mmu-miR-195; mmu-miR-142-3p; mmu-miR-297c; mmu-m…
AFF1	9.242	62	6.7085	mmu-miR-145; mmu-miR-467e; mmu-miR-495; mmu-miR-335-5p; mmu-miR-713; mmu-miR-804; mmu-miR-130a; mmu-miR-200b; mmu-miR-431; mmu-miR-466g; mmu-miR-19a; mmu-miR-130b; mmu-miR-150; mmu-miR-369-3p; mmu-miR-674; mmu-miR-296-5p; mmu-miR-291a-5p; mmu-miR-28; mmu-miR-181a; mmu-miR-205; mmu-miR-291b-5p; mmu-miR-543; mmu-miR-669f-3p; mmu-miR-27a; mmu-miR-467h; mmu-miR-541; mmu-miR-103; mmu-miR-182; mmu-miR-…
AFF2	1.082	25	23.1054	mmu-miR-142-3p; mmu-miR-124; mmu-miR-467e; mmu-miR-495; mmu-miR-335-5p; mmu-miR-669d; mmu-miR-19a; mmu-miR-467f; mmu-miR-291a-5p; mmu-miR-741; mmu-miR-669o-5p; mmu-miR-181a; mmu-miR-335-3p; mmu-miR-291b-5p; mmu-miR-382; mmu-miR-27a; mmu-miR-378; mmu-miR-467h; mmu-miR-541; mmu-miR-381; mmu-miR-33; mmu-miR-142-5p; mmu-miR-1935; mmu-miR-19b; mmu-miR-466f
AFF4	6.443	107	16.6072	mmu-miR-145; mmu-miR-495; mmu-miR-335-5p; mmu-miR-804; mmu-miR-93; mmu-miR-96; mmu-miR-431; mmu-miR-466g; mmu-miR-20a; mmu-miR-340-5p; mmu-miR-30d; mmu-miR-466b-3p; mmu-miR-30a; mmu-miR-323-3p; mmu-miR-434-3p; mmu-miR-21; mmu-miR-29c; mmu-miR-367; mmu-miR-669f-3p; mmu-miR-541; mmu-miR-106a; mmu-miR-468; mmu-miR-17; mmu-miR-381; mmu-miR-302a; mmu-miR-669a-3p; mmu-miR-466a-3p; mmu-miR-302d; mmu-miR…
AFG3L2	0.748	27	36.0963	mmu-miR-433; mmu-miR-93; mmu-miR-130a; mmu-miR-374; mmu-miR-760-5p; mmu-miR-20b; mmu-miR-130b; mmu-miR-150; mmu-miR-369-3p; mmu-miR-20a; mmu-miR-340-5p; mmu-miR-291b-3p; mmu-miR-669o-5p; mmu-miR-34c; mmu-miR-181a; mmu-miR-760-3p; mmu-miR-132; mmu-miR-22; mmu-miR-34a; mmu-miR-27a; mmu-miR-301a; mmu-miR-106b; mmu-miR-103; mmu-miR-106a; mmu-miR-17; mmu-miR-142-5p; mmu-miR-410
AFTPH	7.593	27	3.55591	mmu-miR-302d; mmu-miR-466a-3p; mmu-miR-669a-3p; mmu-miR-350; mmu-miR-335-5p; mmu-miR-804; mmu-miR-467c; mmu-miR-19a; mmu-miR-295; mmu-miR-467f; mmu-miR-323-3p; mmu-miR-377; mmu-miR-181a; mmu-miR-205; mmu-miR-335-3p; mmu-miR-669f-3p; mmu-miR-543; mmu-miR-669o-3p; mmu-miR-103; mmu-miR-291a-3p; mmu-miR-329; mmu-miR-381; mmu-miR-672; mmu-miR-302a; mmu-miR-292-5p; mmu-miR-19b; mmu-miR-294
AGA	0.246	7	28.4553	mmu-miR-195; mmu-miR-433; mmu-miR-205; mmu-miR-329; mmu-miR-15a; mmu-miR-15b; mmu-miR-16
AGAP2	1.994	26	13.0391	mmu-miR-302d; mmu-miR-804; mmu-miR-93; mmu-miR-136; mmu-miR-484; mmu-miR-20b; mmu-miR-150; mmu-miR-295; mmu-miR-20a; mmu-miR-762; mmu-miR-377; mmu-miR-34c; mmu-miR-155; mmu-miR-760-3p; mmu-miR-34a; mmu-miR-1893; mmu-miR-106b; mmu-miR-1983; mmu-miR-106a; mmu-miR-291a-3p; mmu-miR-17; mmu-miR-329; mmu-miR-1952; mmu-miR-302a; mmu-miR-294; mmu-miR-423-5p
AGAP3	0.651	6	9.21659	mmu-miR-376b; mmu-miR-484; mmu-miR-329; mmu-miR-669f-3p; mmu-miR-467f; mmu-miR-183
AGBL3	3.195	22	6.88576	mmu-miR-195; mmu-miR-466a-3p; mmu-miR-29b; mmu-miR-130a; mmu-miR-16; mmu-miR-1198-3p; mmu-miR-466g; mmu-miR-19a; mmu-miR-130b; mmu-miR-467f; mmu-miR-29a; mmu-miR-29c; mmu-miR-335-3p; mmu-miR-669f-3p; mmu-miR-27a; mmu-miR-378; mmu-miR-15a; mmu-miR-301a; mmu-miR-541; mmu-miR-1935; mmu-miR-15b; mmu-miR-19b
AGBL4	0.393	4	10.1781	mmu-miR-433; mmu-miR-1224; mmu-miR-22; mmu-miR-296-5p
AGFG1	2.554	25	9.78857	mmu-miR-669a-3p; mmu-miR-148b; mmu-miR-350; mmu-miR-495; mmu-miR-429; mmu-miR-130a; mmu-miR-136; mmu-miR-200b; mmu-miR-148a; mmu-miR-130b; mmu-miR-23b; mmu-miR-101b; mmu-miR-152; mmu-miR-181a; mmu-miR-543; mmu-miR-669o-3p; mmu-miR-27a; mmu-miR-382; mmu-miR-1198-5p; mmu-miR-301a; mmu-miR-1983; mmu-miR-103; mmu-miR-200c; mmu-miR-23a; mmu-miR-423-5p
AGGF1	3.149	45	14.2903	mmu-miR-200a; mmu-miR-145; mmu-miR-29b; mmu-miR-335-5p; mmu-miR-804; mmu-miR-150; mmu-miR-369-3p; mmu-miR-340-5p; mmu-miR-467f; mmu-miR-296-5p; mmu-miR-30d; mmu-miR-291a-5p; mmu-miR-28; mmu-miR-30a; mmu-miR-29c; mmu-miR-205; mmu-miR-291b-5p; mmu-miR-367; mmu-miR-543; mmu-miR-1893; mmu-miR-27a; mmu-miR-1198-5p; mmu-miR-30b; mmu-miR-541; mmu-miR-1983; mmu-miR-103; mmu-miR-1952; mmu-miR-423-5p; mmu-…
AGK	1.038	27	26.0116	mmu-miR-195; mmu-miR-148b; mmu-miR-350; mmu-miR-16; mmu-miR-374; mmu-miR-148a; mmu-miR-760-5p; mmu-miR-369-3p; mmu-miR-23b; mmu-miR-762; mmu-miR-741; mmu-miR-291b-3p; mmu-miR-330; mmu-miR-152; mmu-miR-127; mmu-miR-22; mmu-miR-15a; mmu-miR-423-3p; mmu-miR-1983; mmu-miR-103; mmu-miR-129-2-3p; mmu-miR-1952; mmu-miR-421; mmu-miR-129-1-3p; mmu-miR-23a; mmu-miR-15b; mmu-miR-410
AGL	18.383	118	6.41897	mmu-miR-145; mmu-miR-495; mmu-miR-335-5p; mmu-miR-713; mmu-miR-804; mmu-miR-93; mmu-miR-467c; mmu-miR-19a; mmu-miR-20a; mmu-miR-340-5p; mmu-miR-30d; mmu-miR-28; mmu-miR-30a; mmu-miR-434-3p; mmu-miR-290-3p; mmu-miR-155; mmu-let-7a; mmu-miR-669f-3p; mmu-miR-191; mmu-miR-541; mmu-miR-106a; mmu-miR-468; mmu-miR-129-2-3p; mmu-miR-17; mmu-miR-202-3p; mmu-miR-154; mmu-miR-292-3p; mmu-miR-672; mmu-miR-12…
AGPAT1	6.681	11	1.64646	mmu-miR-181a; mmu-miR-205; mmu-miR-484; mmu-miR-103; mmu-miR-182; mmu-miR-1983; mmu-miR-129-2-3p; mmu-miR-1224; mmu-miR-129-1-3p; mmu-miR-423-5p; mmu-miR-101b
AGPAT2	3.384	27	7.97872	mmu-miR-195; mmu-miR-433; mmu-miR-145; mmu-miR-669l; mmu-miR-16; mmu-miR-760-5p; mmu-miR-669d; mmu-miR-484; mmu-miR-669f-5p; mmu-miR-18b; mmu-miR-376c; mmu-miR-466b-3p; mmu-miR-762; mmu-miR-466c-3p; mmu-miR-330; mmu-miR-34c; mmu-miR-205; mmu-miR-134; mmu-miR-760-3p; mmu-miR-34a; mmu-miR-669a-5p; mmu-miR-15a; mmu-miR-1198-5p; mmu-miR-1224; mmu-miR-1952; mmu-miR-1935; mmu-miR-15b
AGPAT3	32.461	58	1.78676	mmu-miR-145; mmu-miR-467e; mmu-miR-713; mmu-miR-804; mmu-miR-130a; mmu-miR-130b; mmu-miR-150; mmu-miR-674; mmu-miR-323-3p; mmu-miR-21; mmu-miR-181a; mmu-miR-155; mmu-let-7a; mmu-miR-27a; mmu-miR-1198-5p; mmu-miR-467h; mmu-miR-202-3p; mmu-miR-26b; mmu-miR-154; mmu-miR-381; mmu-miR-421; mmu-miR-672; mmu-miR-302a; mmu-miR-423-5p; mmu-miR-302d; mmu-let-7g; mmu-miR-433; mmu-miR-350; mmu-miR-297c; mmu-…
AGPAT4	1.854	24	12.945	mmu-miR-195; mmu-miR-29b; mmu-miR-136; mmu-miR-16; mmu-miR-669d; mmu-miR-674; mmu-miR-296-5p; mmu-miR-377; mmu-miR-291b-3p; mmu-miR-330; mmu-miR-335-3p; mmu-miR-29a; mmu-miR-29c; mmu-miR-669f-3p; mmu-miR-1893; mmu-miR-27a; mmu-miR-15a; mmu-miR-129-2-3p; mmu-miR-1224; mmu-miR-329; mmu-miR-129-1-3p; mmu-miR-1935; mmu-miR-15b; mmu-miR-423-5p
AGPAT5	19.248	107	5.55902	mmu-miR-495; mmu-miR-335-5p; mmu-miR-713; mmu-miR-804; mmu-miR-93; mmu-miR-96; mmu-miR-431; mmu-miR-466g; mmu-miR-20a; mmu-miR-340-5p; mmu-miR-30d; mmu-miR-466b-3p; mmu-miR-28; mmu-miR-30a; mmu-miR-323-3p; mmu-miR-21; mmu-miR-290-3p; mmu-miR-29c; mmu-miR-669f-3p; mmu-miR-106a; mmu-miR-468; mmu-miR-129-2-3p; mmu-miR-17; mmu-miR-154; mmu-miR-292-3p; mmu-miR-381; mmu-miR-672; mmu-miR-129-1-3p; mmu-m…
AGPAT6	1.715	33	19.242	mmu-miR-145; mmu-miR-93; mmu-miR-20a; mmu-miR-434-3p; mmu-miR-290-3p; mmu-miR-205; mmu-let-7a; mmu-miR-467a; mmu-miR-103; mmu-miR-106a; mmu-miR-1983; mmu-miR-17; mmu-miR-26b; mmu-miR-202-3p; mmu-miR-292-3p; mmu-miR-1952; mmu-let-7g; mmu-miR-195; mmu-miR-350; mmu-miR-136; mmu-miR-16; mmu-miR-20b; mmu-miR-484; mmu-let-7c; mmu-miR-377; mmu-miR-760-3p; mmu-miR-15a; mmu-miR-106b; mmu-let-7e; mmu-miR-3…
AGPAT9	4.158	20	4.81	mmu-miR-1960; mmu-miR-495; mmu-miR-669l; mmu-miR-335-5p; mmu-miR-804; mmu-miR-136; mmu-miR-466g; mmu-miR-669f-5p; mmu-miR-340-5p; mmu-miR-291a-5p; mmu-miR-205; mmu-miR-132; mmu-miR-291b-5p; mmu-miR-669a-5p; mmu-miR-1198-5p; mmu-miR-376b; mmu-miR-1983; mmu-miR-26b; mmu-miR-1952; mmu-miR-26a
AGPHD1	3.859	60	15.5481	mmu-miR-200a; mmu-miR-145; mmu-miR-467e; mmu-miR-495; mmu-miR-335-5p; mmu-miR-804; mmu-miR-130a; mmu-miR-200b; mmu-miR-466g; mmu-miR-130b; mmu-miR-150; mmu-miR-340-5p; mmu-miR-291a-5p; mmu-miR-434-3p; mmu-miR-181a; mmu-miR-205; mmu-let-7a; mmu-miR-291b-5p; mmu-miR-543; mmu-miR-34a; mmu-miR-1198-5p; mmu-miR-467h; mmu-miR-103; mmu-miR-468; mmu-miR-129-2-3p; mmu-miR-202-3p; mmu-miR-154; mmu-miR-381;…
AGPS	16.597	84	5.06116	mmu-miR-145; mmu-miR-495; mmu-miR-713; mmu-miR-431; mmu-miR-466g; mmu-miR-467c; mmu-miR-340-5p; mmu-miR-466b-3p; mmu-miR-296-5p; mmu-miR-323-3p; mmu-miR-21; mmu-miR-290-3p; mmu-miR-669f-3p; mmu-miR-367; mmu-miR-191; mmu-miR-541; mmu-miR-468; mmu-miR-129-2-3p; mmu-miR-154; mmu-miR-292-3p; mmu-miR-381; mmu-miR-672; mmu-miR-129-1-3p; mmu-miR-302a; mmu-miR-302d; mmu-miR-195; mmu-miR-433; mmu-miR-124;…
AGRN	20.547	90	4.3802	mmu-miR-713; mmu-miR-804; mmu-miR-96; mmu-miR-431; mmu-miR-19a; mmu-miR-296-5p; mmu-miR-28; mmu-miR-434-3p; mmu-miR-29c; mmu-miR-290-3p; mmu-miR-669f-3p; mmu-let-7a; mmu-miR-202-3p; mmu-miR-672; mmu-miR-381; mmu-miR-292-3p; mmu-miR-669a-3p; mmu-miR-466a-3p; mmu-let-7g; mmu-miR-195; mmu-miR-124; mmu-miR-148b; mmu-miR-669l; mmu-miR-125a-5p; mmu-miR-760-5p; mmu-miR-148a; mmu-miR-669f-5p; mmu-miR-720…
AGTPBP1	13.897	80	5.75664	mmu-miR-495; mmu-miR-335-5p; mmu-miR-713; mmu-miR-93; mmu-miR-96; mmu-miR-431; mmu-miR-467c; mmu-miR-20a; mmu-miR-340-5p; mmu-miR-296-5p; mmu-miR-30d; mmu-miR-30a; mmu-miR-434-3p; mmu-let-7a; mmu-miR-106a; mmu-miR-17; mmu-miR-202-3p; mmu-miR-154; mmu-miR-381; mmu-miR-302a; mmu-miR-669a-3p; mmu-miR-466a-3p; mmu-miR-302d; mmu-let-7g; mmu-miR-433; mmu-miR-148b; mmu-miR-136; mmu-miR-125a-5p; mmu-miR-…
AGTR1A	1.966	29	14.7508	mmu-miR-466a-3p; mmu-miR-148b; mmu-miR-297c; mmu-miR-130a; mmu-miR-136; mmu-miR-148a; mmu-miR-130b; mmu-miR-30d; mmu-miR-376c; mmu-miR-466b-3p; mmu-miR-101b; mmu-miR-28; mmu-miR-30a; mmu-miR-466c-3p; mmu-miR-434-3p; mmu-miR-34c; mmu-miR-152; mmu-miR-669f-3p; mmu-miR-34a; mmu-miR-376a; mmu-miR-30b; mmu-miR-301a; mmu-miR-1198-5p; mmu-miR-193b; mmu-miR-541; mmu-miR-1952; mmu-miR-672; mmu-miR-297a; m…
AGTR1B	6.009	30	4.99251	mmu-let-7g; mmu-miR-466a-3p; mmu-miR-142-3p; mmu-miR-200a; mmu-miR-350; mmu-miR-374; mmu-miR-369-3p; mmu-miR-467f; mmu-miR-340-5p; mmu-miR-376c; mmu-miR-466b-3p; mmu-let-7c; mmu-miR-466c-3p; mmu-miR-434-3p; mmu-miR-141; mmu-miR-330; mmu-miR-21; mmu-let-7a; mmu-miR-669f-3p; mmu-miR-27a; mmu-miR-1198-5p; mmu-miR-193b; mmu-miR-541; mmu-let-7e; mmu-miR-468; mmu-miR-202-3p; mmu-miR-421; mmu-miR-672; m…
AHCTF1	11.925	89	7.46331	mmu-miR-145; mmu-miR-495; mmu-miR-335-5p; mmu-miR-713; mmu-miR-93; mmu-miR-96; mmu-miR-431; mmu-miR-466g; mmu-miR-20a; mmu-miR-340-5p; mmu-miR-296-5p; mmu-miR-28; mmu-miR-323-3p; mmu-miR-434-3p; mmu-miR-29c; mmu-miR-669f-3p; mmu-let-7a; mmu-miR-191; mmu-miR-106a; mmu-miR-129-2-3p; mmu-miR-17; mmu-miR-202-3p; mmu-miR-381; mmu-miR-672; mmu-miR-129-1-3p; mmu-miR-302a; mmu-miR-302d; mmu-let-7g; mmu-m…
AHCY	1.595	14	8.77743	mmu-miR-1196; mmu-miR-181a; mmu-miR-543; mmu-miR-1893; mmu-miR-136; mmu-miR-378; mmu-miR-484; mmu-miR-23b; mmu-miR-1952; mmu-miR-18b; mmu-miR-340-5p; mmu-miR-672; mmu-miR-23a; mmu-miR-741
AHCYL1	17.096	79	4.62096	mmu-miR-145; mmu-miR-495; mmu-miR-713; mmu-miR-96; mmu-miR-467c; mmu-miR-19a; mmu-miR-30d; mmu-miR-30a; mmu-miR-21; mmu-miR-29c; mmu-miR-290-3p; mmu-miR-155; mmu-miR-669f-3p; mmu-miR-367; mmu-miR-129-2-3p; mmu-miR-292-3p; mmu-miR-154; mmu-miR-129-1-3p; mmu-miR-302a; mmu-miR-669a-3p; mmu-miR-302d; mmu-miR-195; mmu-miR-124; mmu-miR-148b; mmu-miR-125a-5p; mmu-miR-760-5p; mmu-miR-1198-3p; mmu-miR-148…
AHCYL2	20.161	49	2.43043	mmu-miR-145; mmu-miR-495; mmu-miR-335-5p; mmu-miR-200b; mmu-miR-466g; mmu-miR-150; mmu-miR-674; mmu-miR-467f; mmu-miR-466b-3p; mmu-miR-323-3p; mmu-miR-434-3p; mmu-miR-155; mmu-miR-132; mmu-miR-34a; mmu-miR-1198-5p; mmu-miR-191; mmu-miR-1983; mmu-miR-468; mmu-miR-1952; mmu-miR-381; mmu-miR-672; mmu-miR-302a; mmu-miR-195; mmu-miR-302d; mmu-miR-124; mmu-miR-429; mmu-miR-125a-5p; mmu-miR-16; mmu-miR-…
AHDC1	23.116	65	2.81191	mmu-miR-145; mmu-miR-713; mmu-miR-93; mmu-miR-96; mmu-miR-466g; mmu-miR-20a; mmu-miR-296-5p; mmu-miR-28; mmu-miR-290-3p; mmu-miR-669f-3p; mmu-let-7a; mmu-miR-106a; mmu-miR-17; mmu-miR-672; mmu-miR-381; mmu-miR-292-3p; mmu-let-7g; mmu-miR-195; mmu-miR-433; mmu-miR-148b; mmu-miR-760-5p; mmu-miR-148a; mmu-miR-20b; mmu-miR-720; mmu-miR-23b; mmu-miR-377; mmu-miR-34c; mmu-miR-330; mmu-miR-152; mmu-miR-…
AHNAK	17.498	90	5.14344	mmu-miR-145; mmu-miR-335-5p; mmu-miR-713; mmu-miR-93; mmu-miR-96; mmu-miR-431; mmu-miR-20a; mmu-miR-296-5p; mmu-miR-30d; mmu-miR-28; mmu-miR-30a; mmu-miR-434-3p; mmu-miR-29c; mmu-miR-290-3p; mmu-miR-669f-3p; mmu-miR-541; mmu-miR-106a; mmu-miR-17; mmu-miR-129-2-3p; mmu-miR-292-3p; mmu-miR-381; mmu-miR-672; mmu-miR-129-1-3p; mmu-miR-433; mmu-miR-124; mmu-miR-148b; mmu-miR-669l; mmu-miR-136; mmu-miR…
AHNAK2	10.886	62	5.69539	mmu-miR-200a; mmu-miR-467e; mmu-miR-495; mmu-miR-804; mmu-miR-96; mmu-miR-467c; mmu-miR-674; mmu-miR-467f; mmu-miR-296-5p; mmu-miR-28; mmu-miR-434-3p; mmu-miR-181a; mmu-miR-290-3p; mmu-miR-155; mmu-miR-132; mmu-miR-27a; mmu-miR-467a; mmu-miR-467h; mmu-miR-182; mmu-miR-103; mmu-miR-1983; mmu-miR-1952; mmu-miR-292-3p; mmu-miR-421; mmu-miR-302a; mmu-miR-423-5p; mmu-miR-302d; mmu-miR-195; mmu-miR-124…
AHR	4.981	83	16.6633	mmu-miR-495; mmu-miR-713; mmu-miR-804; mmu-miR-96; mmu-miR-431; mmu-miR-466g; mmu-miR-340-5p; mmu-miR-30d; mmu-miR-466b-3p; mmu-miR-28; mmu-miR-30a; mmu-miR-323-3p; mmu-miR-21; mmu-miR-29c; mmu-miR-155; mmu-miR-367; mmu-let-7a; mmu-miR-202-3p; mmu-miR-381; mmu-miR-302a; mmu-miR-466a-3p; mmu-miR-302d; mmu-let-7g; mmu-miR-195; mmu-miR-433; mmu-miR-124; mmu-miR-148b; mmu-miR-136; mmu-miR-760-5p; mmu…
AHSA1	0.391	16	40.9207	mmu-miR-804; mmu-miR-93; mmu-miR-136; mmu-miR-760-5p; mmu-miR-20b; mmu-miR-20a; mmu-miR-762; mmu-miR-290-3p; mmu-miR-378; mmu-miR-467a; mmu-miR-106b; mmu-miR-532-5p; mmu-miR-106a; mmu-miR-17; mmu-miR-292-3p; mmu-miR-421
AI118078	2.478	24	9.68523	mmu-miR-142-3p; mmu-miR-148b; mmu-miR-1960; mmu-miR-297c; mmu-miR-29b; mmu-miR-148a; mmu-miR-760-5p; mmu-miR-484; mmu-miR-674; mmu-miR-340-5p; mmu-miR-296-5p; mmu-miR-762; mmu-miR-741; mmu-miR-152; mmu-miR-330; mmu-miR-29c; mmu-miR-29a; mmu-miR-134; mmu-miR-760-3p; mmu-miR-378; mmu-miR-27a; mmu-miR-183; mmu-miR-297a; mmu-miR-423-5p
AI314180	5.036	68	13.5028	mmu-miR-145; mmu-miR-713; mmu-miR-804; mmu-miR-96; mmu-miR-466g; mmu-miR-30d; mmu-miR-28; mmu-miR-323-3p; mmu-miR-30a; mmu-miR-434-3p; mmu-miR-21; mmu-miR-155; mmu-miR-669f-3p; mmu-miR-367; mmu-miR-468; mmu-miR-202-3p; mmu-miR-195; mmu-miR-148b; mmu-miR-136; mmu-miR-125a-5p; mmu-miR-148a; mmu-miR-125b-5p; mmu-miR-23b; mmu-miR-377; mmu-miR-330; mmu-miR-152; mmu-miR-335-3p; mmu-miR-134; mmu-miR-15a…
AI317395	2.644	43	16.2632	mmu-miR-145; mmu-miR-29b; mmu-miR-713; mmu-miR-130a; mmu-miR-130b; mmu-miR-150; mmu-miR-467f; mmu-miR-291a-5p; mmu-miR-323-3p; mmu-miR-29c; mmu-miR-543; mmu-miR-291b-5p; mmu-miR-27a; mmu-miR-468; mmu-miR-129-2-3p; mmu-miR-129-1-3p; mmu-miR-466a-3p; mmu-miR-142-3p; mmu-miR-124; mmu-miR-350; mmu-miR-136; mmu-miR-872; mmu-miR-125a-5p; mmu-miR-760-5p; mmu-miR-484; mmu-miR-125b-5p; mmu-miR-18b; mmu-mi…
AI429214	1.957	25	12.7747	mmu-miR-466a-3p; mmu-miR-145; mmu-miR-804; mmu-miR-872; mmu-miR-431; mmu-miR-760-5p; mmu-miR-466b-3p; mmu-miR-323-3p; mmu-miR-487b; mmu-miR-466c-3p; mmu-miR-21; mmu-miR-330; mmu-miR-34c; mmu-miR-335-3p; mmu-miR-669f-3p; mmu-miR-134; mmu-miR-34a; mmu-miR-293; mmu-miR-1198-5p; mmu-miR-193b; mmu-miR-541; mmu-miR-376b; mmu-miR-154; mmu-miR-1952; mmu-miR-672
AI462493	0.601	7	11.6473	mmu-miR-145; mmu-miR-205; mmu-miR-29a; mmu-miR-29b; mmu-miR-29c; mmu-miR-335-3p; mmu-miR-377
AI464131	4.087	58	14.1913	mmu-miR-200a; mmu-miR-145; mmu-miR-29b; mmu-miR-713; mmu-miR-804; mmu-miR-130a; mmu-miR-96; mmu-miR-130b; mmu-miR-150; mmu-miR-466b-3p; mmu-miR-291a-5p; mmu-miR-323-3p; mmu-miR-21; mmu-miR-29c; mmu-let-7a; mmu-miR-669f-3p; mmu-miR-291b-5p; mmu-miR-1893; mmu-miR-27a; mmu-miR-1198-5p; mmu-miR-191; mmu-miR-541; mmu-miR-103; mmu-miR-182; mmu-miR-129-2-3p; mmu-miR-1952; mmu-miR-381; mmu-miR-421; mmu-m…
AI467606	1.881	29	15.4173	mmu-miR-669a-3p; mmu-miR-495; mmu-miR-429; mmu-miR-200b; mmu-miR-466g; mmu-miR-669d; mmu-miR-484; mmu-miR-150; mmu-miR-18b; mmu-miR-340-5p; mmu-miR-30d; mmu-miR-762; mmu-miR-291a-5p; mmu-miR-30a; mmu-miR-741; mmu-miR-330; mmu-miR-291b-5p; mmu-miR-760-3p; mmu-miR-132; mmu-miR-669o-3p; mmu-miR-27a; mmu-miR-382; mmu-miR-30b; mmu-miR-468; mmu-miR-200c; mmu-miR-142-5p; mmu-miR-1952; mmu-miR-381; mmu-m…
AI593442	5.474	78	14.2492	mmu-miR-495; mmu-miR-335-5p; mmu-miR-713; mmu-miR-466g; mmu-miR-340-5p; mmu-miR-466b-3p; mmu-miR-30d; mmu-miR-296-5p; mmu-miR-28; mmu-miR-30a; mmu-miR-323-3p; mmu-miR-21; mmu-miR-29c; mmu-miR-290-3p; mmu-miR-669f-3p; mmu-miR-367; mmu-miR-191; mmu-miR-468; mmu-miR-202-3p; mmu-miR-292-3p; mmu-miR-381; mmu-miR-669a-3p; mmu-miR-466a-3p; mmu-miR-195; mmu-miR-433; mmu-miR-124; mmu-miR-669l; mmu-miR-669…
AI597468	3.34	43	12.8743	mmu-miR-200a; mmu-miR-145; mmu-miR-495; mmu-miR-804; mmu-miR-674; mmu-miR-340-5p; mmu-miR-291a-5p; mmu-miR-323-3p; mmu-miR-434-3p; mmu-miR-181a; mmu-miR-543; mmu-miR-367; mmu-miR-291b-5p; mmu-miR-541; mmu-miR-103; mmu-miR-26b; mmu-miR-154; mmu-miR-381; mmu-miR-421; mmu-miR-32; mmu-miR-124; mmu-miR-669l; mmu-miR-872; mmu-miR-669f-5p; mmu-miR-363-3p; mmu-miR-484; mmu-miR-23b; mmu-miR-487b; mmu-miR-…
AI597479	2.936	48	16.3488	mmu-miR-495; mmu-miR-335-5p; mmu-miR-200b; mmu-miR-150; mmu-miR-674; mmu-miR-467f; mmu-miR-466b-3p; mmu-miR-323-3p; mmu-miR-28; mmu-miR-434-3p; mmu-miR-155; mmu-miR-669f-3p; mmu-miR-543; mmu-miR-367; mmu-miR-34a; mmu-miR-1198-5p; mmu-miR-1983; mmu-miR-129-2-3p; mmu-miR-381; mmu-miR-421; mmu-miR-129-1-3p; mmu-miR-466a-3p; mmu-miR-32; mmu-miR-124; mmu-miR-148b; mmu-miR-1960; mmu-miR-350; mmu-miR-42…
AI661453	3.972	41	10.3223	mmu-miR-145; mmu-miR-29b; mmu-miR-96; mmu-miR-19a; mmu-miR-150; mmu-miR-674; mmu-miR-369-3p; mmu-miR-467f; mmu-miR-296-5p; mmu-miR-29c; mmu-miR-290-3p; mmu-miR-205; mmu-miR-669f-3p; mmu-miR-467a; mmu-miR-182; mmu-miR-1983; mmu-miR-129-2-3p; mmu-miR-26b; mmu-miR-292-3p; mmu-miR-672; mmu-miR-129-1-3p; mmu-miR-19b; mmu-miR-148b; mmu-miR-1960; mmu-miR-669l; mmu-miR-136; mmu-miR-374; mmu-miR-148a; mmu…
AI836003	2.329	35	15.0279	mmu-miR-200a; mmu-miR-713; mmu-miR-200b; mmu-miR-466b-3p; mmu-miR-28; mmu-miR-205; mmu-miR-669o-3p; mmu-miR-1893; mmu-miR-103; mmu-miR-423-5p; mmu-miR-669a-3p; mmu-miR-433; mmu-miR-148b; mmu-miR-1960; mmu-miR-429; mmu-miR-136; mmu-miR-125a-5p; mmu-miR-760-5p; mmu-miR-148a; mmu-miR-669d; mmu-miR-484; mmu-miR-125b-5p; mmu-miR-377; mmu-miR-141; mmu-miR-466c-3p; mmu-miR-152; mmu-miR-330; mmu-miR-335-…
AI837181	1.363	33	24.2113	mmu-miR-335-5p; mmu-miR-130a; mmu-miR-96; mmu-miR-19a; mmu-miR-130b; mmu-miR-30d; mmu-miR-296-5p; mmu-miR-291a-5p; mmu-miR-30a; mmu-miR-28; mmu-miR-155; mmu-miR-291b-5p; mmu-miR-34a; mmu-miR-30b; mmu-miR-103; mmu-miR-129-2-3p; mmu-miR-129-1-3p; mmu-miR-19b; mmu-miR-195; mmu-miR-125a-5p; mmu-miR-16; mmu-miR-125b-5p; mmu-miR-18b; mmu-miR-762; mmu-miR-291b-3p; mmu-miR-34c; mmu-miR-15a; mmu-miR-378; …
AI846148	2.024	44	21.7391	mmu-miR-145; mmu-miR-335-5p; mmu-miR-130a; mmu-miR-466g; mmu-miR-19a; mmu-miR-130b; mmu-miR-28; mmu-miR-434-3p; mmu-miR-21; mmu-miR-181a; mmu-miR-155; mmu-miR-669f-3p; mmu-let-7a; mmu-miR-132; mmu-miR-27a; mmu-miR-1983; mmu-miR-129-2-3p; mmu-miR-26b; mmu-miR-1952; mmu-miR-381; mmu-miR-421; mmu-miR-129-1-3p; mmu-miR-19b; mmu-let-7g; mmu-miR-124; mmu-miR-148b; mmu-miR-1960; mmu-miR-136; mmu-miR-125…
AI848285	0.642	13	20.2492	mmu-miR-152; mmu-miR-181a; mmu-miR-148b; mmu-miR-760-3p; mmu-miR-130a; mmu-miR-301a; mmu-miR-148a; mmu-miR-130b; mmu-miR-484; mmu-miR-129-2-3p; mmu-miR-1952; mmu-miR-129-1-3p; mmu-miR-423-5p
AI987944	1.892	54	28.5412	mmu-miR-495; mmu-miR-93; mmu-miR-130a; mmu-miR-431; mmu-miR-19a; mmu-miR-130b; mmu-miR-674; mmu-miR-20a; mmu-miR-291a-5p; mmu-miR-181a; mmu-miR-290-3p; mmu-miR-205; mmu-miR-669f-3p; mmu-miR-291b-5p; mmu-miR-669o-3p; mmu-miR-467a; mmu-miR-1198-5p; mmu-miR-106a; mmu-miR-468; mmu-miR-17; mmu-miR-292-3p; mmu-miR-302a; mmu-miR-19b; mmu-miR-669a-3p; mmu-miR-302d; mmu-miR-433; mmu-miR-148b; mmu-miR-1960…
AIF1L	2.54	42	16.5354	mmu-miR-145; mmu-miR-335-5p; mmu-miR-466g; mmu-miR-19a; mmu-miR-674; mmu-miR-466b-3p; mmu-miR-669o-5p; mmu-miR-205; mmu-miR-1198-5p; mmu-miR-541; mmu-miR-182; mmu-miR-129-2-3p; mmu-miR-26b; mmu-miR-672; mmu-miR-421; mmu-miR-129-1-3p; mmu-miR-19b; mmu-miR-423-5p; mmu-miR-195; mmu-miR-466a-3p; mmu-miR-124; mmu-miR-669l; mmu-miR-136; mmu-miR-16; mmu-miR-760-5p; mmu-miR-484; mmu-miR-669f-5p; mmu-miR-…
AIFM1	4.001	52	12.9968	mmu-miR-145; mmu-miR-335-5p; mmu-miR-713; mmu-miR-93; mmu-miR-431; mmu-miR-150; mmu-miR-674; mmu-miR-20a; mmu-miR-467f; mmu-let-7a; mmu-miR-34a; mmu-miR-27a; mmu-miR-1983; mmu-miR-106a; mmu-miR-103; mmu-miR-17; mmu-miR-202-3p; mmu-miR-1952; mmu-miR-421; mmu-miR-302a; mmu-let-7g; mmu-miR-195; mmu-miR-302d; mmu-miR-433; mmu-miR-124; mmu-miR-125a-5p; mmu-miR-16; mmu-miR-1198-3p; mmu-miR-669d; mmu-mi…
AIFM3	0.718	2	2.78552	mmu-miR-1935; mmu-miR-96
AIG1	11.428	93	8.13791	mmu-miR-495; mmu-miR-335-5p; mmu-miR-713; mmu-miR-804; mmu-miR-93; mmu-miR-96; mmu-miR-431; mmu-miR-467c; mmu-miR-20a; mmu-miR-340-5p; mmu-miR-30d; mmu-miR-466b-3p; mmu-miR-28; mmu-miR-30a; mmu-miR-434-3p; mmu-miR-155; mmu-miR-290-3p; mmu-miR-367; mmu-miR-1893; mmu-miR-106a; mmu-miR-468; mmu-miR-17; mmu-miR-292-3p; mmu-miR-672; mmu-miR-302a; mmu-miR-466a-3p; mmu-miR-302d; mmu-miR-433; mmu-miR-148…
AIM1	1.651	36	21.805	mmu-miR-200a; mmu-miR-495; mmu-miR-335-5p; mmu-miR-804; mmu-miR-200b; mmu-miR-431; mmu-miR-150; mmu-miR-674; mmu-miR-369-3p; mmu-miR-296-5p; mmu-miR-181a; mmu-miR-34a; mmu-miR-27a; mmu-miR-421; mmu-miR-381; mmu-miR-195; mmu-miR-433; mmu-miR-148b; mmu-miR-1960; mmu-miR-297c; mmu-miR-429; mmu-miR-16; mmu-miR-760-5p; mmu-miR-148a; mmu-miR-669d; mmu-miR-18b; mmu-miR-377; mmu-miR-141; mmu-miR-152; mmu…
AIM1L	0.186	5	26.8817	mmu-miR-21; mmu-miR-29a; mmu-miR-29b; mmu-miR-29c; mmu-miR-27a
AIMP1	0.244	6	24.5902	mmu-miR-1983; mmu-miR-484; mmu-miR-297c; mmu-miR-760-3p; mmu-miR-297a; mmu-miR-466g
AIMP2	1.922	19	9.88554	mmu-miR-1960; mmu-miR-29b; mmu-miR-431; mmu-miR-762; mmu-miR-28; mmu-miR-434-3p; mmu-miR-34c; mmu-miR-669o-5p; mmu-miR-205; mmu-miR-29a; mmu-miR-29c; mmu-miR-34a; mmu-miR-27a; mmu-miR-382; mmu-miR-1198-5p; mmu-miR-376b; mmu-miR-26b; mmu-miR-381; mmu-miR-26a
AIP	1.326	11	8.29563	mmu-miR-127; mmu-miR-205; mmu-miR-669f-3p; mmu-miR-191; mmu-miR-423-3p; mmu-miR-431; mmu-miR-103; mmu-miR-182; mmu-miR-150; mmu-miR-467f; mmu-miR-1935
AJAP1	2.699	21	7.78066	mmu-miR-200a; mmu-miR-433; mmu-miR-297c; mmu-miR-713; mmu-miR-96; mmu-miR-374; mmu-miR-484; mmu-miR-101b; mmu-miR-1196; mmu-miR-141; mmu-miR-330; mmu-miR-34c; mmu-miR-134; mmu-miR-34a; mmu-miR-382; mmu-miR-191; mmu-miR-183; mmu-miR-103; mmu-miR-1952; mmu-miR-297a; mmu-miR-466f
AK129341	1.402	27	19.2582	mmu-miR-32; mmu-miR-466a-3p; mmu-miR-433; mmu-miR-713; mmu-miR-804; mmu-miR-125a-5p; mmu-miR-466g; mmu-miR-363-3p; mmu-miR-484; mmu-miR-674; mmu-miR-125b-5p; mmu-miR-340-5p; mmu-miR-762; mmu-miR-28; mmu-miR-323-3p; mmu-miR-377; mmu-miR-335-3p; mmu-miR-367; mmu-miR-27a; mmu-miR-193b; mmu-miR-25; mmu-miR-1983; mmu-miR-129-2-3p; mmu-miR-142-5p; mmu-miR-129-1-3p; mmu-miR-292-5p; mmu-miR-423-5p
AK2	1.442	22	15.2566	mmu-miR-200a; mmu-miR-124; mmu-miR-467e; mmu-miR-136; mmu-miR-466g; mmu-miR-760-5p; mmu-miR-674; mmu-miR-369-3p; mmu-miR-720; mmu-miR-151-5p; mmu-miR-741; mmu-miR-141; mmu-miR-21; mmu-miR-330; mmu-miR-27a; mmu-miR-1198-5p; mmu-miR-467h; mmu-miR-103; mmu-miR-468; mmu-miR-421; mmu-miR-672; mmu-miR-423-5p
AK4	13.772	73	5.30061	mmu-miR-495; mmu-miR-335-5p; mmu-miR-93; mmu-miR-20a; mmu-miR-340-5p; mmu-miR-30d; mmu-miR-30a; mmu-miR-28; mmu-miR-29c; mmu-miR-367; mmu-miR-468; mmu-miR-106a; mmu-miR-17; mmu-miR-129-2-3p; mmu-miR-129-1-3p; mmu-miR-302a; mmu-miR-302d; mmu-miR-195; mmu-miR-124; mmu-miR-148b; mmu-miR-125a-5p; mmu-miR-760-5p; mmu-miR-1198-3p; mmu-miR-148a; mmu-miR-20b; mmu-miR-295; mmu-miR-125b-5p; mmu-miR-34c; mm…
AK7	0.777	10	12.87	mmu-miR-141; mmu-miR-200a; mmu-miR-335-3p; mmu-miR-134; mmu-miR-429; mmu-miR-1198-5p; mmu-miR-200b; mmu-miR-200c; mmu-miR-421; mmu-miR-323-3p
AK8	0.338	4	11.8343	mmu-miR-134; mmu-miR-669f-3p; mmu-miR-672; mmu-miR-1935
AKAP1	5.859	60	10.2407	mmu-miR-130a; mmu-miR-96; mmu-miR-431; mmu-miR-466g; mmu-miR-467c; mmu-miR-19a; mmu-miR-130b; mmu-miR-150; mmu-miR-467f; mmu-miR-30d; mmu-miR-291a-5p; mmu-miR-30a; mmu-miR-290-3p; mmu-miR-132; mmu-miR-669f-3p; mmu-miR-367; mmu-miR-291b-5p; mmu-miR-126-3p; mmu-miR-34a; mmu-miR-467a; mmu-miR-30b; mmu-miR-103; mmu-miR-182; mmu-miR-1952; mmu-miR-292-3p; mmu-miR-381; mmu-miR-421; mmu-miR-672; mmu-miR-…
AKAP11	7.402	69	9.3218	mmu-miR-335-5p; mmu-miR-713; mmu-miR-93; mmu-miR-466g; mmu-miR-20a; mmu-miR-466b-3p; mmu-miR-30d; mmu-miR-28; mmu-miR-30a; mmu-miR-323-3p; mmu-miR-669f-3p; mmu-miR-106a; mmu-miR-17; mmu-miR-202-3p; mmu-miR-381; mmu-miR-302a; mmu-miR-669a-3p; mmu-miR-466a-3p; mmu-miR-302d; mmu-miR-195; mmu-miR-124; mmu-miR-148b; mmu-miR-148a; mmu-miR-20b; mmu-miR-295; mmu-miR-23b; mmu-miR-466c-3p; mmu-miR-1196; mm…
AKAP12	5.793	62	10.7026	mmu-miR-145; mmu-miR-335-5p; mmu-miR-713; mmu-miR-200b; mmu-miR-431; mmu-miR-466g; mmu-miR-19a; mmu-miR-150; mmu-miR-369-3p; mmu-miR-674; mmu-miR-291a-5p; mmu-miR-434-3p; mmu-miR-205; mmu-let-7a; mmu-miR-669f-3p; mmu-miR-543; mmu-miR-291b-5p; mmu-miR-27a; mmu-miR-1198-5p; mmu-miR-103; mmu-miR-202-3p; mmu-miR-1952; mmu-miR-381; mmu-miR-421; mmu-miR-19b; mmu-miR-466a-3p; mmu-let-7g; mmu-miR-195; mm…
AKAP13	8.072	70	8.67195	mmu-miR-335-5p; mmu-miR-713; mmu-miR-804; mmu-miR-93; mmu-miR-466g; mmu-miR-20a; mmu-miR-323-3p; mmu-miR-28; mmu-miR-29c; mmu-miR-106a; mmu-miR-17; mmu-miR-202-3p; mmu-miR-302a; mmu-miR-466a-3p; mmu-miR-302d; mmu-miR-195; mmu-miR-124; mmu-miR-148b; mmu-miR-669l; mmu-miR-136; mmu-miR-125a-5p; mmu-miR-760-5p; mmu-miR-148a; mmu-miR-669f-5p; mmu-miR-20b; mmu-miR-295; mmu-miR-125b-5p; mmu-miR-34c; mmu…
AKAP17B	4.448	71	15.9622	mmu-miR-145; mmu-miR-495; mmu-miR-335-5p; mmu-miR-713; mmu-miR-93; mmu-miR-96; mmu-miR-431; mmu-miR-466g; mmu-miR-20a; mmu-miR-340-5p; mmu-miR-323-3p; mmu-miR-434-3p; mmu-miR-29c; mmu-miR-290-3p; mmu-miR-155; mmu-miR-669f-3p; mmu-miR-106a; mmu-miR-17; mmu-miR-129-2-3p; mmu-miR-154; mmu-miR-292-3p; mmu-miR-381; mmu-miR-672; mmu-miR-129-1-3p; mmu-miR-302a; mmu-miR-669a-3p; mmu-miR-302d; mmu-miR-195…
AKAP5	16.846	103	6.11421	mmu-miR-145; mmu-miR-495; mmu-miR-713; mmu-miR-804; mmu-miR-93; mmu-miR-431; mmu-miR-466g; mmu-miR-467c; mmu-miR-19a; mmu-miR-20a; mmu-miR-340-5p; mmu-miR-466b-3p; mmu-miR-323-3p; mmu-miR-434-3p; mmu-miR-29c; mmu-miR-290-3p; mmu-let-7a; mmu-miR-669f-3p; mmu-miR-541; mmu-miR-106a; mmu-miR-17; mmu-miR-202-3p; mmu-miR-292-3p; mmu-miR-381; mmu-miR-302a; mmu-miR-466a-3p; mmu-miR-302d; mmu-let-7g; mmu-…
AKAP8L	2.412	50	20.7297	mmu-miR-495; mmu-miR-713; mmu-miR-804; mmu-miR-93; mmu-miR-466g; mmu-miR-369-3p; mmu-miR-20a; mmu-miR-340-5p; mmu-miR-467f; mmu-miR-291a-5p; mmu-miR-155; mmu-miR-205; mmu-miR-291b-5p; mmu-let-7a; mmu-miR-669o-3p; mmu-miR-34a; mmu-miR-27a; mmu-miR-103; mmu-miR-106a; mmu-miR-17; mmu-miR-202-3p; mmu-miR-1952; mmu-miR-669a-3p; mmu-let-7g; mmu-miR-148b; mmu-miR-374; mmu-miR-148a; mmu-miR-20b; mmu-miR-…
AKAP9	1.274	26	20.4082	mmu-miR-195; mmu-miR-466a-3p; mmu-miR-145; mmu-miR-29b; mmu-miR-350; mmu-miR-16; mmu-miR-374; mmu-miR-18b; mmu-miR-467f; mmu-miR-340-5p; mmu-miR-101b; mmu-miR-377; mmu-miR-29a; mmu-miR-29c; mmu-miR-669f-3p; mmu-miR-132; mmu-miR-376a; mmu-miR-15a; mmu-miR-532-5p; mmu-miR-1983; mmu-miR-103; mmu-miR-26b; mmu-miR-142-5p; mmu-miR-381; mmu-miR-26a; mmu-miR-15b
AKIP1	0.44	8	18.1818	mmu-miR-141; mmu-miR-200a; mmu-miR-124; mmu-miR-145; mmu-miR-29a; mmu-miR-29b; mmu-miR-29c; mmu-miR-323-3p
AKIRIN1	3.328	62	18.6298	mmu-miR-200a; mmu-miR-145; mmu-miR-29b; mmu-miR-467e; mmu-miR-495; mmu-miR-467c; mmu-miR-150; mmu-miR-369-3p; mmu-miR-467f; mmu-miR-296-5p; mmu-miR-466b-3p; mmu-miR-30d; mmu-miR-291a-5p; mmu-miR-30a; mmu-miR-21; mmu-miR-181a; mmu-miR-290-3p; mmu-miR-29c; mmu-miR-132; mmu-miR-291b-5p; mmu-miR-669f-3p; mmu-miR-27a; mmu-miR-467a; mmu-miR-1198-5p; mmu-miR-30b; mmu-miR-467h; mmu-miR-129-2-3p; mmu-miR-…
AKIRIN2	0.694	16	23.0548	mmu-miR-466c-3p; mmu-miR-142-3p; mmu-miR-181a; mmu-miR-433; mmu-miR-1960; mmu-miR-130a; mmu-miR-27a; mmu-miR-301a; mmu-miR-193b; mmu-miR-130b; mmu-miR-103; mmu-miR-369-3p; mmu-miR-142-5p; mmu-miR-340-5p; mmu-miR-381; mmu-miR-466b-3p
AKR1A1	2.178	17	7.80533	mmu-miR-145; mmu-miR-148b; mmu-miR-350; mmu-miR-804; mmu-miR-148a; mmu-miR-484; mmu-miR-674; mmu-miR-152; mmu-miR-330; mmu-miR-34c; mmu-miR-205; mmu-miR-335-3p; mmu-miR-669f-3p; mmu-miR-34a; mmu-miR-541; mmu-miR-1224; mmu-miR-1952
AKR1B10	0.678	8	11.7994	mmu-miR-25; mmu-miR-32; mmu-miR-182; mmu-miR-363-3p; mmu-miR-468; mmu-miR-367; mmu-miR-713; mmu-miR-28
AKR1B3	2.628	29	11.035	mmu-miR-145; mmu-miR-350; mmu-miR-467e; mmu-miR-130a; mmu-miR-96; mmu-miR-125a-5p; mmu-miR-669d; mmu-miR-484; mmu-miR-130b; mmu-miR-18b; mmu-miR-125b-5p; mmu-miR-23b; mmu-miR-466b-3p; mmu-miR-762; mmu-miR-466c-3p; mmu-miR-434-3p; mmu-miR-34c; mmu-miR-669o-5p; mmu-miR-205; mmu-miR-34a; mmu-miR-301a; mmu-miR-467h; mmu-miR-532-5p; mmu-miR-1983; mmu-miR-182; mmu-miR-26b; mmu-miR-1224; mmu-miR-26a; mm…
AKR1E1	2.079	23	11.063	mmu-let-7g; mmu-miR-466g; mmu-miR-669d; mmu-miR-150; mmu-miR-674; mmu-miR-369-3p; mmu-miR-466b-3p; mmu-let-7c; mmu-miR-377; mmu-miR-466c-3p; mmu-miR-34c; mmu-miR-290-3p; mmu-let-7a; mmu-miR-132; mmu-miR-134; mmu-miR-34a; mmu-miR-467a; mmu-miR-378; mmu-miR-541; mmu-let-7e; mmu-miR-202-3p; mmu-miR-292-3p; mmu-miR-292-5p
AKR7A5	0.335	4	11.9403	mmu-miR-468; mmu-miR-132; mmu-miR-672; mmu-miR-1935
AKT2	16.59	60	3.61664	mmu-miR-145; mmu-miR-335-5p; mmu-miR-713; mmu-miR-93; mmu-miR-200b; mmu-miR-431; mmu-miR-467c; mmu-miR-150; mmu-miR-20a; mmu-miR-340-5p; mmu-miR-296-5p; mmu-miR-323-3p; mmu-miR-181a; mmu-miR-543; mmu-let-7a; mmu-miR-34a; mmu-miR-106a; mmu-miR-1983; mmu-miR-17; mmu-miR-1952; mmu-miR-302a; mmu-miR-423-5p; mmu-miR-302d; mmu-let-7g; mmu-miR-195; mmu-miR-124; mmu-miR-148b; mmu-miR-429; mmu-miR-136; mm…
AKT3	10.222	81	7.92409	mmu-miR-495; mmu-miR-335-5p; mmu-miR-804; mmu-miR-93; mmu-miR-96; mmu-miR-466g; mmu-miR-19a; mmu-miR-20a; mmu-miR-340-5p; mmu-miR-296-5p; mmu-miR-466b-3p; mmu-miR-28; mmu-miR-21; mmu-miR-29c; mmu-let-7a; mmu-miR-106a; mmu-miR-17; mmu-miR-129-2-3p; mmu-miR-202-3p; mmu-miR-381; mmu-miR-672; mmu-miR-129-1-3p; mmu-let-7g; mmu-miR-195; mmu-miR-124; mmu-miR-136; mmu-miR-125a-5p; mmu-miR-20b; mmu-miR-12…
AKTIP	3.652	34	9.30997	mmu-miR-200a; mmu-miR-93; mmu-miR-20a; mmu-miR-467f; mmu-miR-340-5p; mmu-miR-30d; mmu-miR-30a; mmu-miR-434-3p; mmu-miR-155; mmu-miR-30b; mmu-miR-1198-5p; mmu-miR-106a; mmu-miR-17; mmu-miR-672; mmu-miR-381; mmu-miR-1952; mmu-miR-302a; mmu-miR-302d; mmu-miR-433; mmu-miR-136; mmu-miR-20b; mmu-miR-484; mmu-miR-295; mmu-miR-376c; mmu-miR-101b; mmu-miR-377; mmu-miR-291b-3p; mmu-miR-141; mmu-miR-335-3p;…
ALAD	1.49	17	11.4094	mmu-miR-713; mmu-miR-136; mmu-miR-96; mmu-miR-19a; mmu-miR-291a-5p; mmu-miR-34c; mmu-miR-205; mmu-miR-291b-5p; mmu-miR-760-3p; mmu-miR-34a; mmu-miR-378; mmu-miR-423-3p; mmu-miR-1983; mmu-miR-182; mmu-miR-421; mmu-miR-672; mmu-miR-19b
ALDH16A1	8.88	31	3.49099	mmu-miR-142-3p; mmu-miR-148b; mmu-miR-1960; mmu-miR-350; mmu-miR-335-5p; mmu-miR-713; mmu-miR-804; mmu-miR-136; mmu-miR-148a; mmu-miR-760-5p; mmu-miR-150; mmu-miR-376c; mmu-miR-762; mmu-miR-291a-5p; mmu-miR-28; mmu-miR-741; mmu-miR-330; mmu-miR-152; mmu-miR-669o-5p; mmu-miR-291b-5p; mmu-miR-760-3p; mmu-miR-378; mmu-miR-423-3p; mmu-miR-541; mmu-miR-182; mmu-miR-1224; mmu-miR-1952; mmu-miR-672; mmu…
ALDH18A1	5.78	49	8.47751	mmu-miR-200a; mmu-miR-335-5p; mmu-miR-96; mmu-miR-431; mmu-miR-19a; mmu-miR-150; mmu-miR-674; mmu-miR-30d; mmu-miR-28; mmu-miR-30a; mmu-miR-205; mmu-miR-34a; mmu-miR-27a; mmu-miR-30b; mmu-miR-1198-5p; mmu-miR-1983; mmu-miR-182; mmu-miR-103; mmu-miR-129-2-3p; mmu-miR-1952; mmu-miR-421; mmu-miR-129-1-3p; mmu-miR-19b; mmu-miR-423-5p; mmu-miR-350; mmu-miR-297c; mmu-miR-760-5p; mmu-miR-669d; mmu-miR-4…
ALDH1A2	0.722	19	26.3158	mmu-miR-1960; mmu-miR-669l; mmu-miR-713; mmu-miR-96; mmu-miR-1198-3p; mmu-miR-669f-5p; mmu-miR-484; mmu-miR-340-5p; mmu-miR-23b; mmu-miR-377; mmu-miR-34c; mmu-miR-760-3p; mmu-miR-132; mmu-miR-34a; mmu-miR-669a-5p; mmu-miR-182; mmu-miR-154; mmu-miR-23a; mmu-miR-466f
ALDH1A3	5.176	61	11.7852	mmu-miR-200a; mmu-miR-145; mmu-miR-467e; mmu-miR-713; mmu-miR-804; mmu-miR-96; mmu-miR-466g; mmu-miR-150; mmu-miR-674; mmu-miR-340-5p; mmu-miR-296-5p; mmu-miR-291a-5p; mmu-miR-323-3p; mmu-miR-434-3p; mmu-miR-21; mmu-let-7a; mmu-miR-543; mmu-miR-291b-5p; mmu-miR-669o-3p; mmu-miR-467h; mmu-miR-103; mmu-miR-182; mmu-miR-1983; mmu-miR-468; mmu-miR-129-2-3p; mmu-miR-202-3p; mmu-miR-129-1-3p; mmu-miR-6…
ALDH1B1	2.15	46	21.3953	mmu-miR-200a; mmu-miR-467e; mmu-miR-467c; mmu-miR-674; mmu-miR-296-5p; mmu-miR-21; mmu-miR-290-3p; mmu-miR-205; mmu-let-7a; mmu-miR-467a; mmu-miR-467h; mmu-miR-541; mmu-miR-468; mmu-miR-1983; mmu-miR-26b; mmu-miR-1952; mmu-miR-672; mmu-miR-292-3p; mmu-miR-302a; mmu-let-7g; mmu-miR-195; mmu-miR-302d; mmu-miR-433; mmu-miR-142-3p; mmu-miR-16; mmu-miR-484; mmu-miR-295; mmu-miR-762; mmu-let-7c; mmu-mi…
ALDH1L1	2.634	14	5.31511	mmu-miR-669o-5p; mmu-miR-1960; mmu-miR-669f-3p; mmu-miR-335-5p; mmu-miR-27a; mmu-miR-125a-5p; mmu-miR-484; mmu-miR-468; mmu-miR-674; mmu-miR-421; mmu-miR-125b-5p; mmu-miR-467f; mmu-miR-376c; mmu-miR-1935
ALDH1L2	19.612	129	6.57761	mmu-miR-145; mmu-miR-713; mmu-miR-804; mmu-miR-96; mmu-miR-19a; mmu-miR-20a; mmu-miR-466b-3p; mmu-miR-30d; mmu-miR-30a; mmu-miR-323-3p; mmu-miR-434-3p; mmu-miR-29c; mmu-miR-290-3p; mmu-miR-367; mmu-miR-106a; mmu-miR-381; mmu-miR-292-3p; mmu-miR-466a-3p; mmu-miR-195; mmu-miR-433; mmu-miR-124; mmu-miR-669l; mmu-miR-136; mmu-miR-760-5p; mmu-miR-1198-3p; mmu-miR-148a; mmu-miR-669f-5p; mmu-miR-335-3p;…
ALDH2	5.339	64	11.9873	mmu-miR-29b; mmu-miR-335-5p; mmu-miR-713; mmu-miR-130a; mmu-miR-19a; mmu-miR-130b; mmu-miR-150; mmu-miR-674; mmu-miR-340-5p; mmu-miR-467f; mmu-miR-296-5p; mmu-miR-30d; mmu-miR-28; mmu-miR-30a; mmu-miR-669o-5p; mmu-miR-21; mmu-miR-205; mmu-miR-29c; mmu-miR-367; mmu-miR-669f-3p; mmu-miR-27a; mmu-miR-191; mmu-miR-30b; mmu-miR-182; mmu-miR-103; mmu-miR-1983; mmu-miR-129-2-3p; mmu-miR-1952; mmu-miR-67…
ALDH3A2	4.442	76	17.1094	mmu-miR-713; mmu-miR-804; mmu-miR-93; mmu-miR-467c; mmu-miR-19a; mmu-miR-20a; mmu-miR-296-5p; mmu-miR-28; mmu-miR-290-3p; mmu-miR-106a; mmu-miR-468; mmu-miR-17; mmu-miR-292-3p; mmu-miR-302a; mmu-miR-466a-3p; mmu-miR-302d; mmu-miR-195; mmu-miR-433; mmu-miR-124; mmu-miR-148b; mmu-miR-125a-5p; mmu-miR-1198-3p; mmu-miR-148a; mmu-miR-20b; mmu-miR-295; mmu-miR-720; mmu-miR-125b-5p; mmu-miR-34c; mmu-miR…
ALDH5A1	4.188	61	14.5654	mmu-miR-200a; mmu-miR-145; mmu-miR-495; mmu-miR-713; mmu-miR-804; mmu-miR-466g; mmu-miR-674; mmu-miR-340-5p; mmu-miR-467f; mmu-miR-30d; mmu-miR-466b-3p; mmu-miR-291a-5p; mmu-miR-28; mmu-miR-30a; mmu-miR-669o-5p; mmu-miR-181a; mmu-miR-205; mmu-miR-132; mmu-miR-291b-5p; mmu-miR-543; mmu-miR-669f-3p; mmu-miR-34a; mmu-miR-27a; mmu-miR-1198-5p; mmu-miR-30b; mmu-miR-182; mmu-miR-129-2-3p; mmu-miR-26b; …
ALDH6A1	1.826	43	23.5487	mmu-miR-495; mmu-miR-93; mmu-miR-96; mmu-miR-200b; mmu-miR-674; mmu-miR-20a; mmu-miR-340-5p; mmu-miR-669o-5p; mmu-let-7a; mmu-miR-541; mmu-miR-106a; mmu-miR-182; mmu-miR-17; mmu-miR-202-3p; mmu-miR-154; mmu-let-7g; mmu-miR-195; mmu-miR-433; mmu-miR-124; mmu-miR-350; mmu-miR-669l; mmu-miR-429; mmu-miR-872; mmu-miR-16; mmu-miR-669f-5p; mmu-miR-20b; mmu-miR-484; mmu-miR-18b; mmu-miR-762; mmu-let-7c;…
ALDH7A1	2.708	23	8.49335	mmu-miR-195; mmu-miR-145; mmu-miR-350; mmu-miR-804; mmu-miR-125a-5p; mmu-miR-16; mmu-miR-19a; mmu-miR-484; mmu-miR-674; mmu-miR-125b-5p; mmu-miR-376c; mmu-miR-434-3p; mmu-miR-34c; mmu-miR-205; mmu-miR-34a; mmu-miR-15a; mmu-miR-27a; mmu-miR-183; mmu-miR-541; mmu-miR-103; mmu-miR-376b; mmu-miR-15b; mmu-miR-19b
ALDH9A1	1.126	34	30.1954	mmu-miR-200a; mmu-miR-467e; mmu-miR-93; mmu-miR-431; mmu-miR-150; mmu-miR-20a; mmu-miR-674; mmu-miR-28; mmu-miR-669o-5p; mmu-miR-290-3p; mmu-miR-467a; mmu-miR-467h; mmu-miR-106a; mmu-miR-17; mmu-miR-1952; mmu-miR-292-3p; mmu-miR-302a; mmu-miR-302d; mmu-miR-124; mmu-miR-872; mmu-miR-20b; mmu-miR-295; mmu-miR-762; mmu-miR-377; mmu-miR-141; mmu-miR-760-3p; mmu-miR-134; mmu-miR-22; mmu-miR-106b; mmu-…
ALDOC	0.998	6	6.01202	mmu-miR-124; mmu-miR-205; mmu-miR-134; mmu-miR-1952; mmu-miR-33; mmu-miR-762
ALG1	0.926	11	11.879	mmu-miR-302d; mmu-miR-466a-3p; mmu-miR-669f-3p; mmu-miR-22; mmu-miR-804; mmu-miR-468; mmu-miR-484; mmu-miR-291a-3p; mmu-miR-295; mmu-miR-302a; mmu-miR-294
ALG10B	6.149	74	12.0345	mmu-miR-495; mmu-miR-335-5p; mmu-miR-713; mmu-miR-804; mmu-miR-431; mmu-miR-466g; mmu-miR-19a; mmu-miR-340-5p; mmu-miR-466b-3p; mmu-miR-28; mmu-miR-323-3p; mmu-miR-434-3p; mmu-miR-669f-3p; mmu-miR-191; mmu-miR-468; mmu-miR-202-3p; mmu-miR-381; mmu-miR-672; mmu-miR-669a-3p; mmu-miR-466a-3p; mmu-miR-195; mmu-miR-433; mmu-miR-124; mmu-miR-23b; mmu-miR-466c-3p; mmu-miR-34c; mmu-miR-330; mmu-miR-134; …
ALG11	7.494	65	8.67361	mmu-miR-804; mmu-miR-93; mmu-miR-466g; mmu-miR-19a; mmu-miR-20a; mmu-miR-340-5p; mmu-miR-30d; mmu-miR-30a; mmu-miR-323-3p; mmu-miR-434-3p; mmu-miR-669f-3p; mmu-let-7a; mmu-miR-191; mmu-miR-541; mmu-miR-106a; mmu-miR-17; mmu-miR-202-3p; mmu-miR-381; mmu-miR-302a; mmu-miR-466a-3p; mmu-let-7g; mmu-miR-302d; mmu-miR-433; mmu-miR-669l; mmu-miR-136; mmu-miR-1198-3p; mmu-miR-669f-5p; mmu-miR-20b; mmu-mi…
ALG12	3.716	39	10.4952	mmu-miR-29b; mmu-miR-200b; mmu-miR-674; mmu-miR-467f; mmu-miR-291a-5p; mmu-miR-434-3p; mmu-miR-181a; mmu-miR-29c; mmu-miR-669f-3p; mmu-miR-291b-5p; mmu-miR-34a; mmu-miR-126-3p; mmu-miR-103; mmu-miR-381; mmu-miR-1952; mmu-miR-195; mmu-miR-466a-3p; mmu-miR-142-3p; mmu-miR-148b; mmu-miR-297c; mmu-miR-429; mmu-miR-16; mmu-miR-148a; mmu-miR-669d; mmu-miR-484; mmu-miR-762; mmu-miR-376c; mmu-miR-101b; m…
ALG13	5.734	73	12.7311	mmu-miR-145; mmu-miR-495; mmu-miR-335-5p; mmu-miR-804; mmu-miR-96; mmu-miR-431; mmu-miR-19a; mmu-miR-340-5p; mmu-miR-30d; mmu-miR-30a; mmu-miR-29c; mmu-miR-290-3p; mmu-miR-669f-3p; mmu-let-7a; mmu-miR-541; mmu-miR-468; mmu-miR-129-2-3p; mmu-miR-202-3p; mmu-miR-292-3p; mmu-miR-129-1-3p; mmu-miR-669a-3p; mmu-let-7g; mmu-miR-136; mmu-miR-34c; mmu-miR-330; mmu-miR-335-3p; mmu-miR-127; mmu-miR-134; mm…
ALG14	0.456	5	10.9649	mmu-miR-125b-5p; mmu-miR-1952; mmu-miR-376c; mmu-miR-125a-5p; mmu-miR-466f
ALG2	5.252	71	13.5187	mmu-miR-145; mmu-miR-495; mmu-miR-713; mmu-miR-93; mmu-miR-466g; mmu-miR-467c; mmu-miR-20a; mmu-miR-340-5p; mmu-miR-30d; mmu-miR-30a; mmu-miR-434-3p; mmu-miR-290-3p; mmu-miR-541; mmu-miR-468; mmu-miR-106a; mmu-miR-17; mmu-miR-292-3p; mmu-miR-381; mmu-miR-302a; mmu-miR-669a-3p; mmu-miR-302d; mmu-miR-195; mmu-miR-124; mmu-miR-148b; mmu-miR-136; mmu-miR-125a-5p; mmu-miR-148a; mmu-miR-20b; mmu-miR-29…
ALG3	2.461	26	10.5648	mmu-let-7g; mmu-miR-195; mmu-miR-124; mmu-miR-148b; mmu-miR-1960; mmu-miR-29b; mmu-miR-804; mmu-miR-16; mmu-miR-148a; mmu-miR-18b; mmu-let-7c; mmu-miR-34c; mmu-miR-152; mmu-miR-181a; mmu-miR-205; mmu-miR-29c; mmu-miR-29a; mmu-let-7a; mmu-miR-34a; mmu-miR-15a; mmu-miR-541; mmu-miR-182; mmu-let-7e; mmu-miR-103; mmu-miR-1935; mmu-miR-15b
ALG5	2.138	22	10.29	mmu-miR-433; mmu-miR-145; mmu-miR-29b; mmu-miR-350; mmu-miR-467e; mmu-miR-125a-5p; mmu-miR-466g; mmu-miR-125b-5p; mmu-miR-434-3p; mmu-miR-34c; mmu-miR-29a; mmu-miR-29c; mmu-miR-669f-3p; mmu-miR-34a; mmu-miR-183; mmu-miR-532-5p; mmu-miR-467h; mmu-miR-468; mmu-miR-26b; mmu-miR-381; mmu-miR-142-5p; mmu-miR-26a
ALG6	1.629	31	19.0301	mmu-miR-302d; mmu-miR-466a-3p; mmu-miR-669a-3p; mmu-miR-495; mmu-miR-335-5p; mmu-miR-93; mmu-miR-125a-5p; mmu-miR-466g; mmu-miR-484; mmu-miR-20b; mmu-miR-20a; mmu-miR-295; mmu-miR-125b-5p; mmu-miR-467f; mmu-miR-376c; mmu-miR-1196; mmu-miR-181a; mmu-miR-335-3p; mmu-miR-669f-3p; mmu-miR-760-3p; mmu-miR-669o-3p; mmu-miR-106b; mmu-miR-106a; mmu-miR-468; mmu-miR-291a-3p; mmu-miR-17; mmu-miR-381; mmu-m…
ALG8	0.626	16	25.5591	mmu-miR-195; mmu-miR-200a; mmu-miR-16; mmu-miR-431; mmu-miR-466g; mmu-miR-760-5p; mmu-miR-101b; mmu-miR-141; mmu-miR-205; mmu-miR-15a; mmu-miR-27a; mmu-miR-26b; mmu-miR-421; mmu-miR-26a; mmu-miR-15b; mmu-miR-292-5p
ALKBH2	1.02	4	3.92157	mmu-miR-1952; mmu-miR-293; mmu-miR-720; mmu-miR-762
ALKBH3	4.59	33	7.18954	mmu-miR-467e; mmu-miR-495; mmu-miR-804; mmu-miR-296-5p; mmu-miR-434-3p; mmu-miR-205; mmu-miR-467h; mmu-miR-129-2-3p; mmu-miR-26b; mmu-miR-1952; mmu-miR-672; mmu-miR-129-1-3p; mmu-miR-302a; mmu-miR-423-5p; mmu-miR-302d; mmu-miR-124; mmu-miR-136; mmu-miR-125a-5p; mmu-miR-760-5p; mmu-miR-669d; mmu-miR-295; mmu-miR-23b; mmu-miR-125b-5p; mmu-miR-151-5p; mmu-miR-330; mmu-miR-760-3p; mmu-miR-378; mmu-mi…
ALKBH4	6.686	35	5.23482	mmu-miR-29b; mmu-miR-335-5p; mmu-miR-713; mmu-miR-340-5p; mmu-miR-296-5p; mmu-miR-291a-5p; mmu-miR-28; mmu-miR-29c; mmu-miR-367; mmu-miR-291b-5p; mmu-let-7a; mmu-miR-103; mmu-miR-672; mmu-miR-1952; mmu-let-7g; mmu-miR-32; mmu-miR-350; mmu-miR-125a-5p; mmu-miR-363-3p; mmu-miR-484; mmu-miR-125b-5p; mmu-miR-23b; mmu-let-7c; mmu-miR-377; mmu-miR-1196; mmu-miR-330; mmu-miR-29a; mmu-miR-378; mmu-miR-25…
ALKBH5	4.275	72	16.8421	mmu-miR-145; mmu-miR-495; mmu-miR-335-5p; mmu-miR-713; mmu-miR-93; mmu-miR-96; mmu-miR-466g; mmu-miR-20a; mmu-miR-340-5p; mmu-miR-323-3p; mmu-miR-29c; mmu-miR-669f-3p; mmu-miR-191; mmu-miR-468; mmu-miR-106a; mmu-miR-17; mmu-miR-381; mmu-miR-302a; mmu-miR-669a-3p; mmu-miR-466a-3p; mmu-miR-302d; mmu-miR-195; mmu-miR-760-5p; mmu-miR-1198-3p; mmu-miR-20b; mmu-miR-295; mmu-miR-377; mmu-miR-34c; mmu-mi…
ALKBH6	1.243	13	10.4586	mmu-miR-433; mmu-miR-29a; mmu-miR-29b; mmu-miR-29c; mmu-miR-350; mmu-miR-293; mmu-miR-136; mmu-miR-376b; mmu-miR-484; mmu-miR-1224; mmu-miR-762; mmu-miR-151-5p; mmu-miR-466f
ALKBH7	0.786	5	6.36132	mmu-miR-350; mmu-miR-674; mmu-miR-760-3p; mmu-miR-1935; mmu-miR-760-5p
ALKBH8	12.698	90	7.08773	mmu-miR-495; mmu-miR-335-5p; mmu-miR-804; mmu-miR-93; mmu-miR-19a; mmu-miR-20a; mmu-miR-340-5p; mmu-miR-466b-3p; mmu-miR-30d; mmu-miR-28; mmu-miR-30a; mmu-miR-323-3p; mmu-miR-434-3p; mmu-miR-21; mmu-miR-29c; mmu-miR-155; mmu-let-7a; mmu-miR-669f-3p; mmu-miR-106a; mmu-miR-17; mmu-miR-129-2-3p; mmu-miR-202-3p; mmu-miR-381; mmu-miR-672; mmu-miR-129-1-3p; mmu-miR-669a-3p; mmu-miR-466a-3p; mmu-let-7g;…
ALMS1	0.16	3	18.75	mmu-miR-124; mmu-miR-760-3p; mmu-miR-377
ALOX12	2.402	38	15.8201	mmu-miR-335-5p; mmu-miR-150; mmu-miR-467f; mmu-miR-181a; mmu-let-7a; mmu-miR-669o-3p; mmu-miR-34a; mmu-miR-1198-5p; mmu-miR-129-2-3p; mmu-miR-26b; mmu-miR-202-3p; mmu-miR-672; mmu-miR-1952; mmu-miR-129-1-3p; mmu-miR-669a-3p; mmu-let-7g; mmu-miR-195; mmu-miR-124; mmu-miR-125a-5p; mmu-miR-16; mmu-miR-374; mmu-miR-125b-5p; mmu-miR-18b; mmu-miR-23b; mmu-let-7c; mmu-miR-377; mmu-miR-330; mmu-miR-34c; …
ALOX12B	0.247	10	40.4858	mmu-miR-34c; mmu-miR-669l; mmu-miR-34a; mmu-miR-429; mmu-miR-669a-5p; mmu-miR-200b; mmu-miR-669f-5p; mmu-miR-200c; mmu-miR-672; mmu-miR-741
ALOX12E	2.384	17	7.13087	mmu-miR-433; mmu-miR-148b; mmu-miR-1960; mmu-miR-297c; mmu-miR-136; mmu-miR-148a; mmu-miR-762; mmu-miR-741; mmu-miR-152; mmu-miR-330; mmu-miR-205; mmu-miR-541; mmu-miR-376b; mmu-miR-1224; mmu-miR-33; mmu-miR-297a; mmu-miR-1935
ALOX15	1.411	11	7.79589	mmu-miR-669a-3p; mmu-miR-152; mmu-miR-330; mmu-miR-148b; mmu-miR-495; mmu-miR-669o-3p; mmu-miR-136; mmu-miR-1198-5p; mmu-miR-148a; mmu-miR-376b; mmu-miR-1935
ALOX5	5.84	42	7.19178	mmu-miR-145; mmu-miR-29b; mmu-miR-495; mmu-miR-335-5p; mmu-miR-713; mmu-miR-96; mmu-miR-674; mmu-miR-30d; mmu-miR-291a-5p; mmu-miR-30a; mmu-miR-29c; mmu-miR-205; mmu-miR-291b-5p; mmu-let-7a; mmu-miR-30b; mmu-miR-182; mmu-miR-202-3p; mmu-miR-1952; mmu-let-7g; mmu-miR-195; mmu-miR-136; mmu-miR-16; mmu-miR-760-5p; mmu-miR-720; mmu-miR-762; mmu-let-7c; mmu-miR-330; mmu-miR-127; mmu-miR-29a; mmu-miR-3…
ALOXE3	1.16	21	18.1034	mmu-miR-195; mmu-miR-200a; mmu-miR-124; mmu-miR-125a-5p; mmu-miR-16; mmu-miR-760-5p; mmu-miR-484; mmu-miR-125b-5p; mmu-miR-28; mmu-miR-141; mmu-miR-669o-5p; mmu-miR-330; mmu-miR-34c; mmu-miR-760-3p; mmu-miR-34a; mmu-miR-15a; mmu-miR-1983; mmu-miR-1952; mmu-miR-1935; mmu-miR-15b; mmu-miR-423-5p
ALPK1	8.334	77	9.23926	mmu-miR-145; mmu-miR-495; mmu-miR-335-5p; mmu-miR-713; mmu-miR-431; mmu-miR-466g; mmu-miR-19a; mmu-miR-30d; mmu-miR-28; mmu-miR-30a; mmu-miR-323-3p; mmu-miR-434-3p; mmu-miR-669f-3p; mmu-let-7a; mmu-miR-541; mmu-miR-468; mmu-miR-202-3p; mmu-miR-381; mmu-miR-302a; mmu-miR-466a-3p; mmu-miR-302d; mmu-let-7g; mmu-miR-195; mmu-miR-433; mmu-miR-124; mmu-miR-148b; mmu-miR-136; mmu-miR-148a; mmu-miR-295; …
ALPK3	1.642	45	27.4056	mmu-miR-200a; mmu-miR-495; mmu-miR-335-5p; mmu-miR-130a; mmu-miR-467c; mmu-miR-19a; mmu-miR-130b; mmu-miR-296-5p; mmu-miR-30d; mmu-miR-30a; mmu-miR-290-3p; mmu-miR-367; mmu-let-7a; mmu-miR-467a; mmu-miR-27a; mmu-miR-30b; mmu-miR-103; mmu-miR-129-2-3p; mmu-miR-292-3p; mmu-miR-129-1-3p; mmu-miR-302a; mmu-miR-19b; mmu-miR-423-5p; mmu-miR-32; mmu-let-7g; mmu-miR-302d; mmu-miR-124; mmu-miR-136; mmu-mi…
ALPL	1.71	25	14.6199	mmu-miR-195; mmu-miR-124; mmu-miR-669l; mmu-miR-125a-5p; mmu-miR-16; mmu-miR-431; mmu-miR-760-5p; mmu-miR-669d; mmu-miR-669f-5p; mmu-miR-150; mmu-miR-125b-5p; mmu-miR-18b; mmu-miR-296-5p; mmu-miR-762; mmu-miR-669o-5p; mmu-miR-335-3p; mmu-miR-669a-5p; mmu-miR-15a; mmu-miR-193b; mmu-miR-182; mmu-miR-1224; mmu-miR-1952; mmu-miR-672; mmu-miR-1935; mmu-miR-15b
ALS2	6.352	59	9.28841	mmu-miR-200a; mmu-miR-145; mmu-miR-29b; mmu-miR-495; mmu-miR-713; mmu-miR-130a; mmu-miR-96; mmu-miR-431; mmu-miR-130b; mmu-miR-340-5p; mmu-miR-28; mmu-miR-323-3p; mmu-miR-29c; mmu-miR-205; mmu-miR-543; mmu-let-7a; mmu-miR-34a; mmu-miR-669o-3p; mmu-miR-182; mmu-miR-103; mmu-miR-1983; mmu-miR-202-3p; mmu-miR-26b; mmu-miR-1952; mmu-miR-421; mmu-miR-672; mmu-miR-669a-3p; mmu-let-7g; mmu-miR-433; mmu-…
ALS2CL	6.345	38	5.98897	mmu-miR-200a; mmu-miR-335-5p; mmu-miR-713; mmu-miR-150; mmu-miR-674; mmu-miR-467f; mmu-miR-669o-5p; mmu-miR-155; mmu-miR-669o-3p; mmu-miR-34a; mmu-miR-27a; mmu-miR-191; mmu-miR-103; mmu-miR-154; mmu-miR-466a-3p; mmu-miR-669a-3p; mmu-miR-148b; mmu-miR-1960; mmu-miR-350; mmu-miR-872; mmu-miR-125a-5p; mmu-miR-760-5p; mmu-miR-148a; mmu-miR-125b-5p; mmu-miR-376c; mmu-miR-741; mmu-miR-377; mmu-miR-141;…
ALX1	5.241	28	5.34249	mmu-miR-124; mmu-miR-145; mmu-miR-297c; mmu-miR-350; mmu-miR-495; mmu-miR-429; mmu-miR-200b; mmu-miR-431; mmu-miR-18b; mmu-miR-23b; mmu-miR-340-5p; mmu-miR-467f; mmu-miR-291a-5p; mmu-miR-434-3p; mmu-miR-1945; mmu-miR-21; mmu-miR-205; mmu-miR-291b-5p; mmu-miR-1198-5p; mmu-miR-541; mmu-miR-129-2-3p; mmu-miR-200c; mmu-miR-1952; mmu-miR-129-1-3p; mmu-miR-297a; mmu-miR-292-5p; mmu-miR-23a; mmu-miR-423…
ALX3	0.999	12	12.012	mmu-miR-145; mmu-miR-335-3p; mmu-miR-132; mmu-miR-126-3p; mmu-miR-378; mmu-miR-125a-5p; mmu-miR-125b-5p; mmu-miR-154; mmu-miR-296-5p; mmu-miR-762; mmu-miR-28; mmu-miR-423-5p
ALX4	8.216	79	9.61538	mmu-miR-335-5p; mmu-miR-713; mmu-miR-804; mmu-miR-93; mmu-miR-96; mmu-miR-431; mmu-miR-467c; mmu-miR-20a; mmu-miR-296-5p; mmu-miR-28; mmu-miR-21; mmu-miR-290-3p; mmu-miR-367; mmu-miR-191; mmu-miR-106a; mmu-miR-17; mmu-miR-154; mmu-miR-672; mmu-miR-292-3p; mmu-miR-302a; mmu-miR-669a-3p; mmu-miR-302d; mmu-miR-195; mmu-miR-124; mmu-miR-148b; mmu-miR-125a-5p; mmu-miR-760-5p; mmu-miR-148a; mmu-miR-20b…
ALYREF	1.849	25	13.5208	mmu-miR-466a-3p; mmu-miR-713; mmu-miR-93; mmu-miR-130a; mmu-miR-669d; mmu-miR-20b; mmu-miR-130b; mmu-miR-20a; mmu-miR-467f; mmu-miR-291b-3p; mmu-miR-181a; mmu-miR-1945; mmu-miR-335-3p; mmu-miR-127; mmu-miR-382; mmu-miR-301a; mmu-miR-106b; mmu-miR-191; mmu-miR-183; mmu-miR-106a; mmu-miR-376b; mmu-miR-17; mmu-miR-329; mmu-miR-1952; mmu-miR-33
ALYREF2	1.273	13	10.2121	mmu-miR-1945; mmu-miR-124; mmu-miR-127; mmu-miR-145; mmu-miR-335-3p; mmu-miR-96; mmu-miR-1198-5p; mmu-miR-193b; mmu-miR-669d; mmu-miR-376b; mmu-miR-329; mmu-miR-33; mmu-miR-1952
AMACR	1.785	44	24.6499	mmu-miR-467e; mmu-miR-495; mmu-miR-713; mmu-miR-96; mmu-miR-431; mmu-miR-19a; mmu-miR-369-3p; mmu-miR-340-5p; mmu-miR-467f; mmu-miR-21; mmu-miR-367; mmu-miR-467h; mmu-miR-541; mmu-miR-182; mmu-miR-26b; mmu-miR-423-5p; mmu-miR-19b; mmu-miR-195; mmu-miR-32; mmu-miR-148b; mmu-miR-1960; mmu-miR-669l; mmu-miR-16; mmu-miR-374; mmu-miR-148a; mmu-miR-669f-5p; mmu-miR-363-3p; mmu-miR-762; mmu-miR-377; mmu…
AMBRA1	7.615	25	3.28299	mmu-miR-148b; mmu-miR-429; mmu-miR-136; mmu-miR-200b; mmu-miR-148a; mmu-miR-760-5p; mmu-miR-484; mmu-miR-674; mmu-miR-23b; mmu-miR-762; mmu-miR-377; mmu-miR-741; mmu-miR-152; mmu-miR-34c; mmu-miR-205; mmu-miR-335-3p; mmu-miR-134; mmu-miR-760-3p; mmu-miR-34a; mmu-miR-376b; mmu-miR-1224; mmu-miR-200c; mmu-miR-1952; mmu-miR-23a; mmu-miR-423-5p
AMD1	2.012	26	12.9225	mmu-miR-32; mmu-miR-145; mmu-miR-350; mmu-miR-713; mmu-miR-804; mmu-miR-136; mmu-miR-374; mmu-miR-466g; mmu-miR-760-5p; mmu-miR-363-3p; mmu-miR-369-3p; mmu-miR-18b; mmu-miR-340-5p; mmu-miR-291a-5p; mmu-miR-1196; mmu-miR-181a; mmu-miR-335-3p; mmu-miR-291b-5p; mmu-miR-132; mmu-miR-367; mmu-miR-543; mmu-miR-193b; mmu-miR-183; mmu-miR-25; mmu-miR-1983; mmu-miR-292-5p
AMDHD1	1.165	18	15.4506	mmu-miR-669a-3p; mmu-miR-433; mmu-miR-467e; mmu-miR-713; mmu-miR-19a; mmu-miR-150; mmu-miR-674; mmu-miR-23b; mmu-miR-376c; mmu-miR-434-3p; mmu-miR-181a; mmu-miR-543; mmu-miR-669o-3p; mmu-miR-467h; mmu-miR-376b; mmu-miR-381; mmu-miR-23a; mmu-miR-19b
AMDHD2	2.819	35	12.4158	mmu-miR-29b; mmu-miR-713; mmu-miR-93; mmu-miR-130a; mmu-miR-431; mmu-miR-130b; mmu-miR-674; mmu-miR-20a; mmu-miR-296-5p; mmu-miR-29c; mmu-let-7a; mmu-miR-27a; mmu-miR-468; mmu-miR-106a; mmu-miR-17; mmu-miR-672; mmu-miR-1952; mmu-let-7g; mmu-miR-148b; mmu-miR-1960; mmu-miR-148a; mmu-miR-760-5p; mmu-miR-20b; mmu-miR-484; mmu-miR-762; mmu-let-7c; mmu-miR-291b-3p; mmu-miR-152; mmu-miR-29a; mmu-miR-29…
AMFR	5.547	39	7.03083	mmu-miR-29b; mmu-miR-200b; mmu-miR-19a; mmu-miR-150; mmu-miR-674; mmu-miR-369-3p; mmu-miR-340-5p; mmu-miR-291a-5p; mmu-miR-29c; mmu-miR-291b-5p; mmu-miR-132; mmu-miR-669o-3p; mmu-miR-103; mmu-miR-1983; mmu-miR-421; mmu-miR-1952; mmu-miR-19b; mmu-miR-669a-3p; mmu-miR-195; mmu-miR-148b; mmu-miR-1960; mmu-miR-350; mmu-miR-429; mmu-miR-125a-5p; mmu-miR-16; mmu-miR-148a; mmu-miR-484; mmu-miR-125b-5p; …
AMIGO1	20.784	87	4.18591	mmu-miR-145; mmu-miR-495; mmu-miR-335-5p; mmu-miR-431; mmu-miR-467c; mmu-miR-340-5p; mmu-miR-30d; mmu-miR-296-5p; mmu-miR-28; mmu-miR-30a; mmu-miR-29c; mmu-miR-290-3p; mmu-miR-155; mmu-let-7a; mmu-miR-541; mmu-miR-129-2-3p; mmu-miR-202-3p; mmu-miR-154; mmu-miR-292-3p; mmu-miR-672; mmu-miR-129-1-3p; mmu-miR-302a; mmu-miR-302d; mmu-miR-195; mmu-let-7g; mmu-miR-124; mmu-miR-148b; mmu-miR-669l; mmu-m…
AMIGO2	2.84	43	15.1408	mmu-miR-93; mmu-miR-431; mmu-miR-467c; mmu-miR-150; mmu-miR-20a; mmu-miR-340-5p; mmu-miR-434-3p; mmu-miR-290-3p; mmu-miR-205; mmu-miR-132; mmu-miR-34a; mmu-miR-467a; mmu-miR-27a; mmu-miR-541; mmu-miR-106a; mmu-miR-17; mmu-miR-292-3p; mmu-miR-381; mmu-miR-421; mmu-miR-195; mmu-miR-433; mmu-miR-297c; mmu-miR-669l; mmu-miR-136; mmu-miR-16; mmu-miR-669f-5p; mmu-miR-484; mmu-miR-20b; mmu-miR-18b; mmu-…
AMIGO3	2.543	44	17.3024	mmu-miR-29b; mmu-miR-335-5p; mmu-miR-713; mmu-miR-19a; mmu-miR-669o-5p; mmu-miR-21; mmu-miR-29c; mmu-miR-290-3p; mmu-miR-34a; mmu-miR-467a; mmu-miR-541; mmu-miR-103; mmu-miR-129-2-3p; mmu-miR-421; mmu-miR-292-3p; mmu-miR-129-1-3p; mmu-miR-423-5p; mmu-miR-19b; mmu-miR-195; mmu-miR-124; mmu-miR-148b; mmu-miR-1960; mmu-miR-669l; mmu-miR-125a-5p; mmu-miR-16; mmu-miR-148a; mmu-miR-669f-5p; mmu-miR-484…
AMMECR1	4.529	73	16.1183	mmu-miR-495; mmu-miR-466g; mmu-miR-19a; mmu-miR-340-5p; mmu-miR-466b-3p; mmu-miR-30d; mmu-miR-30a; mmu-miR-28; mmu-miR-21; mmu-miR-29c; mmu-miR-669f-3p; mmu-miR-191; mmu-miR-468; mmu-miR-129-2-3p; mmu-miR-381; mmu-miR-129-1-3p; mmu-miR-669a-3p; mmu-miR-466a-3p; mmu-miR-195; mmu-miR-433; mmu-miR-124; mmu-miR-148b; mmu-miR-760-5p; mmu-miR-1198-3p; mmu-miR-148a; mmu-miR-720; mmu-miR-23b; mmu-miR-466…
AMMECR1L	3.428	56	16.3361	mmu-miR-200a; mmu-miR-145; mmu-miR-29b; mmu-miR-495; mmu-miR-335-5p; mmu-miR-713; mmu-miR-200b; mmu-miR-466g; mmu-miR-674; mmu-miR-340-5p; mmu-miR-296-5p; mmu-miR-291a-5p; mmu-miR-29c; mmu-miR-205; mmu-let-7a; mmu-miR-543; mmu-miR-291b-5p; mmu-miR-34a; mmu-miR-27a; mmu-miR-191; mmu-miR-541; mmu-miR-182; mmu-miR-103; mmu-miR-1983; mmu-miR-129-2-3p; mmu-miR-202-3p; mmu-miR-381; mmu-miR-672; mmu-miR…
AMN	0.411	11	26.764	mmu-miR-141; mmu-miR-200a; mmu-miR-155; mmu-miR-495; mmu-miR-132; mmu-miR-136; mmu-miR-872; mmu-miR-532-5p; mmu-miR-26b; mmu-miR-1224; mmu-miR-26a
AMN1	8.109	29	3.57627	mmu-miR-466a-3p; mmu-miR-433; mmu-miR-495; mmu-miR-335-5p; mmu-miR-130a; mmu-miR-96; mmu-miR-1198-3p; mmu-miR-19a; mmu-miR-669d; mmu-miR-130b; mmu-miR-467f; mmu-miR-466b-3p; mmu-miR-101b; mmu-miR-28; mmu-miR-323-3p; mmu-miR-741; mmu-miR-291b-3p; mmu-miR-434-3p; mmu-miR-466c-3p; mmu-miR-34c; mmu-miR-205; mmu-miR-34a; mmu-miR-27a; mmu-miR-382; mmu-miR-301a; mmu-miR-182; mmu-miR-26b; mmu-miR-26a; mm…
AMOT	11.363	71	6.24835	mmu-miR-145; mmu-miR-495; mmu-miR-466g; mmu-miR-19a; mmu-miR-30d; mmu-miR-323-3p; mmu-miR-30a; mmu-miR-28; mmu-miR-29c; mmu-miR-155; mmu-miR-669f-3p; mmu-let-7a; mmu-miR-541; mmu-miR-468; mmu-miR-202-3p; mmu-miR-669a-3p; mmu-miR-466a-3p; mmu-let-7g; mmu-miR-195; mmu-miR-124; mmu-miR-148b; mmu-miR-125a-5p; mmu-miR-760-5p; mmu-miR-148a; mmu-miR-23b; mmu-miR-125b-5p; mmu-miR-377; mmu-miR-152; mmu-mi…
AMOTL1	12.65	94	7.43083	mmu-miR-495; mmu-miR-335-5p; mmu-miR-804; mmu-miR-93; mmu-miR-431; mmu-miR-466g; mmu-miR-467c; mmu-miR-19a; mmu-miR-20a; mmu-miR-30d; mmu-miR-466b-3p; mmu-miR-28; mmu-miR-30a; mmu-miR-323-3p; mmu-miR-29c; mmu-miR-290-3p; mmu-miR-106a; mmu-miR-17; mmu-miR-292-3p; mmu-miR-381; mmu-miR-672; mmu-miR-302a; mmu-miR-466a-3p; mmu-miR-302d; mmu-miR-195; mmu-miR-124; mmu-miR-148b; mmu-miR-136; mmu-miR-125a…
AMOTL2	7.261	40	5.50888	mmu-miR-145; mmu-miR-495; mmu-miR-96; mmu-miR-200b; mmu-miR-150; mmu-miR-674; mmu-miR-466b-3p; mmu-miR-30d; mmu-miR-291a-5p; mmu-miR-28; mmu-miR-30a; mmu-miR-205; mmu-miR-669f-3p; mmu-miR-291b-5p; mmu-miR-27a; mmu-miR-30b; mmu-miR-541; mmu-miR-1983; mmu-miR-182; mmu-miR-103; mmu-miR-26b; mmu-miR-381; mmu-miR-195; mmu-miR-433; mmu-miR-124; mmu-miR-350; mmu-miR-429; mmu-miR-16; mmu-miR-1198-3p; mmu…
AMPD2	6.05	54	8.92562	mmu-miR-200a; mmu-miR-29b; mmu-miR-495; mmu-miR-713; mmu-miR-93; mmu-miR-467c; mmu-miR-150; mmu-miR-674; mmu-miR-20a; mmu-miR-28; mmu-miR-29c; mmu-miR-290-3p; mmu-miR-205; mmu-miR-132; mmu-miR-669o-3p; mmu-miR-34a; mmu-miR-27a; mmu-miR-467a; mmu-miR-106a; mmu-miR-17; mmu-miR-1952; mmu-miR-292-3p; mmu-miR-381; mmu-miR-302a; mmu-miR-669a-3p; mmu-miR-302d; mmu-miR-195; mmu-miR-148b; mmu-miR-1960; mm…
AMPD3	3.344	30	8.97129	mmu-miR-124; mmu-miR-495; mmu-miR-93; mmu-miR-130a; mmu-miR-96; mmu-miR-125a-5p; mmu-miR-669d; mmu-miR-19a; mmu-miR-130b; mmu-miR-20b; mmu-miR-20a; mmu-miR-125b-5p; mmu-miR-376c; mmu-miR-28; mmu-miR-434-3p; mmu-miR-291b-3p; mmu-miR-335-3p; mmu-miR-134; mmu-miR-27a; mmu-miR-1198-5p; mmu-miR-106b; mmu-miR-301a; mmu-miR-182; mmu-miR-106a; mmu-miR-17; mmu-miR-33; mmu-miR-381; mmu-miR-421; mmu-miR-193…
AMPH	1.18	14	11.8644	mmu-miR-330; mmu-miR-205; mmu-miR-713; mmu-miR-378; mmu-miR-96; mmu-miR-466g; mmu-miR-182; mmu-miR-468; mmu-miR-103; mmu-miR-26b; mmu-miR-674; mmu-miR-340-5p; mmu-miR-26a; mmu-miR-28
AMT	0.216	6	27.7778	mmu-miR-484; mmu-miR-369-3p; mmu-miR-27a; mmu-miR-374; mmu-miR-101b; mmu-miR-183
AMZ2	3.172	33	10.4035	mmu-miR-29b; mmu-miR-495; mmu-miR-713; mmu-miR-93; mmu-miR-19a; mmu-miR-674; mmu-miR-20a; mmu-miR-29c; mmu-miR-27a; mmu-miR-106a; mmu-miR-103; mmu-miR-1983; mmu-miR-17; mmu-miR-129-2-3p; mmu-miR-672; mmu-miR-129-1-3p; mmu-miR-302a; mmu-miR-19b; mmu-miR-302d; mmu-miR-1960; mmu-miR-125a-5p; mmu-miR-20b; mmu-miR-484; mmu-miR-295; mmu-miR-125b-5p; mmu-miR-101b; mmu-miR-29a; mmu-miR-106b; mmu-miR-291a…
ANAPC1	7.976	90	11.2839	mmu-miR-145; mmu-miR-495; mmu-miR-335-5p; mmu-miR-804; mmu-miR-93; mmu-miR-96; mmu-miR-431; mmu-miR-20a; mmu-miR-340-5p; mmu-miR-466b-3p; mmu-miR-28; mmu-miR-323-3p; mmu-miR-29c; mmu-miR-290-3p; mmu-let-7a; mmu-miR-468; mmu-miR-106a; mmu-miR-17; mmu-miR-202-3p; mmu-miR-154; mmu-miR-292-3p; mmu-miR-672; mmu-miR-302a; mmu-miR-466a-3p; mmu-miR-302d; mmu-let-7g; mmu-miR-195; mmu-miR-148b; mmu-miR-136…
ANAPC10	2.39	33	13.8075	mmu-miR-495; mmu-miR-804; mmu-miR-150; mmu-miR-674; mmu-miR-340-5p; mmu-miR-30d; mmu-miR-30a; mmu-miR-669o-5p; mmu-miR-543; mmu-miR-27a; mmu-miR-30b; mmu-miR-1983; mmu-miR-26b; mmu-miR-421; mmu-miR-423-5p; mmu-miR-148b; mmu-miR-1960; mmu-miR-297c; mmu-miR-669l; mmu-miR-148a; mmu-miR-669f-5p; mmu-miR-741; mmu-miR-152; mmu-miR-335-3p; mmu-miR-669a-5p; mmu-miR-183; mmu-miR-1224; mmu-miR-142-5p; mmu-…
ANAPC11	0.992	24	24.1935	mmu-miR-195; mmu-miR-148b; mmu-miR-1960; mmu-miR-93; mmu-miR-16; mmu-miR-148a; mmu-miR-20b; mmu-miR-20a; mmu-miR-434-3p; mmu-miR-34c; mmu-miR-330; mmu-miR-152; mmu-miR-335-3p; mmu-miR-132; mmu-miR-34a; mmu-miR-15a; mmu-miR-106b; mmu-miR-103; mmu-miR-106a; mmu-miR-376b; mmu-miR-17; mmu-miR-1224; mmu-miR-142-5p; mmu-miR-15b
ANAPC13	0.228	3	13.1579	mmu-miR-27a; mmu-miR-423-3p; mmu-miR-431
ANAPC16	0.93	22	23.6559	mmu-miR-302d; mmu-miR-136; mmu-miR-96; mmu-miR-125a-5p; mmu-miR-295; mmu-miR-125b-5p; mmu-miR-762; mmu-miR-151-5p; mmu-miR-181a; mmu-miR-543; mmu-miR-134; mmu-miR-378; mmu-miR-182; mmu-miR-129-2-3p; mmu-miR-291a-3p; mmu-miR-26b; mmu-miR-26a; mmu-miR-1935; mmu-miR-129-1-3p; mmu-miR-292-5p; mmu-miR-302a; mmu-miR-294
ANAPC2	0.665	5	7.5188	mmu-miR-1196; mmu-miR-129-2-3p; mmu-miR-22; mmu-miR-381; mmu-miR-129-1-3p
ANAPC4	5.124	69	13.466	mmu-miR-335-5p; mmu-miR-713; mmu-miR-804; mmu-miR-93; mmu-miR-96; mmu-miR-466g; mmu-miR-20a; mmu-miR-340-5p; mmu-miR-466b-3p; mmu-miR-434-3p; mmu-miR-155; mmu-miR-669f-3p; mmu-miR-106a; mmu-miR-129-2-3p; mmu-miR-17; mmu-miR-381; mmu-miR-129-1-3p; mmu-miR-302a; mmu-miR-466a-3p; mmu-miR-302d; mmu-miR-195; mmu-miR-136; mmu-miR-20b; mmu-miR-295; mmu-miR-377; mmu-miR-466c-3p; mmu-miR-330; mmu-miR-335-…
ANAPC5	0.55	13	23.6364	mmu-miR-434-3p; mmu-miR-495; mmu-miR-22; mmu-miR-335-5p; mmu-miR-125a-5p; mmu-miR-183; mmu-miR-431; mmu-miR-466g; mmu-miR-19a; mmu-miR-674; mmu-miR-125b-5p; mmu-miR-672; mmu-miR-19b
ANAPC7	2.218	21	9.46799	mmu-miR-302d; mmu-miR-29b; mmu-miR-350; mmu-miR-136; mmu-miR-431; mmu-miR-484; mmu-miR-295; mmu-miR-23b; mmu-miR-762; mmu-miR-291a-5p; mmu-miR-291b-3p; mmu-miR-29a; mmu-miR-29c; mmu-miR-291b-5p; mmu-miR-99b; mmu-miR-291a-3p; mmu-miR-1952; mmu-miR-302a; mmu-miR-23a; mmu-miR-292-5p; mmu-miR-294
ANGEL1	11.675	54	4.62527	mmu-miR-145; mmu-miR-467e; mmu-miR-495; mmu-miR-467c; mmu-miR-674; mmu-miR-467f; mmu-miR-296-5p; mmu-miR-28; mmu-miR-434-3p; mmu-miR-290-3p; mmu-let-7a; mmu-miR-34a; mmu-miR-467a; mmu-miR-467h; mmu-miR-182; mmu-miR-468; mmu-miR-103; mmu-miR-154; mmu-miR-1952; mmu-miR-292-3p; mmu-miR-672; mmu-miR-302a; mmu-miR-423-5p; mmu-let-7g; mmu-miR-195; mmu-miR-302d; mmu-miR-433; mmu-miR-124; mmu-miR-1960; m…
ANGPTL2	1.631	43	26.3642	mmu-miR-200a; mmu-miR-145; mmu-miR-130a; mmu-miR-130b; mmu-miR-467f; mmu-miR-28; mmu-miR-669o-5p; mmu-miR-669f-3p; mmu-miR-367; mmu-let-7a; mmu-miR-132; mmu-miR-34a; mmu-miR-1198-5p; mmu-miR-202-3p; mmu-miR-672; mmu-miR-381; mmu-miR-423-5p; mmu-let-7g; mmu-miR-32; mmu-miR-124; mmu-miR-148b; mmu-miR-669l; mmu-miR-148a; mmu-miR-669f-5p; mmu-miR-363-3p; mmu-miR-18b; mmu-let-7c; mmu-miR-741; mmu-miR-…
ANGPTL4	5.232	44	8.40979	mmu-miR-145; mmu-miR-29b; mmu-miR-96; mmu-miR-150; mmu-miR-674; mmu-miR-29c; mmu-miR-290-3p; mmu-miR-34a; mmu-miR-467a; mmu-miR-27a; mmu-miR-191; mmu-miR-468; mmu-miR-182; mmu-miR-129-2-3p; mmu-miR-1952; mmu-miR-672; mmu-miR-292-3p; mmu-miR-129-1-3p; mmu-miR-302a; mmu-miR-302d; mmu-miR-142-3p; mmu-miR-148b; mmu-miR-1960; mmu-miR-297c; mmu-miR-136; mmu-miR-872; mmu-miR-148a; mmu-miR-484; mmu-miR-2…
ANK	1.806	22	12.1816	mmu-miR-669a-3p; mmu-miR-433; mmu-miR-335-5p; mmu-miR-136; mmu-miR-872; mmu-miR-431; mmu-miR-674; mmu-miR-340-5p; mmu-miR-467f; mmu-miR-720; mmu-miR-466b-3p; mmu-miR-762; mmu-miR-101b; mmu-miR-466c-3p; mmu-miR-181a; mmu-miR-330; mmu-miR-669f-3p; mmu-miR-134; mmu-miR-669o-3p; mmu-miR-129-2-3p; mmu-miR-672; mmu-miR-129-1-3p
ANKFY1	15.289	107	6.9985	mmu-miR-495; mmu-miR-713; mmu-miR-93; mmu-miR-96; mmu-miR-466g; mmu-miR-19a; mmu-miR-20a; mmu-miR-296-5p; mmu-miR-30d; mmu-miR-28; mmu-miR-30a; mmu-miR-323-3p; mmu-miR-434-3p; mmu-miR-21; mmu-miR-29c; mmu-let-7a; mmu-miR-541; mmu-miR-106a; mmu-miR-468; mmu-miR-129-2-3p; mmu-miR-17; mmu-miR-202-3p; mmu-miR-381; mmu-miR-672; mmu-miR-129-1-3p; mmu-miR-669a-3p; mmu-miR-466a-3p; mmu-miR-195; mmu-let-7…
ANKIB1	3.539	95	26.8437	mmu-miR-145; mmu-miR-495; mmu-miR-335-5p; mmu-miR-713; mmu-miR-93; mmu-miR-96; mmu-miR-467c; mmu-miR-19a; mmu-miR-20a; mmu-miR-340-5p; mmu-miR-466b-3p; mmu-miR-323-3p; mmu-miR-290-3p; mmu-miR-669f-3p; mmu-miR-367; mmu-miR-541; mmu-miR-106a; mmu-miR-468; mmu-miR-17; mmu-miR-154; mmu-miR-292-3p; mmu-miR-381; mmu-miR-672; mmu-miR-302a; mmu-miR-669a-3p; mmu-miR-302d; mmu-miR-195; mmu-miR-433; mmu-miR…
ANKLE1	11.236	69	6.14098	mmu-miR-145; mmu-miR-495; mmu-miR-713; mmu-miR-804; mmu-miR-431; mmu-miR-467c; mmu-miR-19a; mmu-miR-340-5p; mmu-miR-28; mmu-miR-323-3p; mmu-miR-21; mmu-miR-29c; mmu-miR-290-3p; mmu-miR-155; mmu-miR-669f-3p; mmu-miR-129-2-3p; mmu-miR-292-3p; mmu-miR-129-1-3p; mmu-miR-302a; mmu-miR-669a-3p; mmu-miR-466a-3p; mmu-miR-302d; mmu-miR-124; mmu-miR-148b; mmu-miR-669l; mmu-miR-136; mmu-miR-760-5p; mmu-miR-…
ANKLE2	4.702	44	9.35772	mmu-miR-200a; mmu-miR-145; mmu-miR-495; mmu-miR-713; mmu-miR-804; mmu-miR-431; mmu-miR-19a; mmu-miR-150; mmu-miR-340-5p; mmu-miR-30d; mmu-miR-291a-5p; mmu-miR-30a; mmu-miR-323-3p; mmu-miR-669o-5p; mmu-miR-181a; mmu-miR-205; mmu-miR-291b-5p; mmu-miR-669f-3p; mmu-miR-34a; mmu-miR-30b; mmu-miR-182; mmu-miR-26b; mmu-miR-421; mmu-miR-302a; mmu-miR-19b; mmu-miR-466a-3p; mmu-miR-302d; mmu-miR-124; mmu-m…
ANKMY2	1.072	39	36.3806	mmu-miR-467e; mmu-miR-713; mmu-miR-93; mmu-miR-19a; mmu-miR-674; mmu-miR-20a; mmu-miR-28; mmu-miR-181a; mmu-miR-543; mmu-miR-27a; mmu-miR-467h; mmu-miR-541; mmu-miR-106a; mmu-miR-17; mmu-miR-26b; mmu-miR-421; mmu-miR-302a; mmu-miR-19b; mmu-miR-195; mmu-miR-302d; mmu-miR-297c; mmu-miR-350; mmu-miR-16; mmu-miR-669d; mmu-miR-20b; mmu-miR-295; mmu-miR-18b; mmu-miR-23b; mmu-miR-15a; mmu-miR-106b; mmu-…
ANKRA2	3.441	36	10.4621	mmu-miR-200a; mmu-miR-145; mmu-miR-335-5p; mmu-miR-93; mmu-miR-130a; mmu-miR-96; mmu-miR-19a; mmu-miR-130b; mmu-miR-20a; mmu-miR-340-5p; mmu-miR-30d; mmu-miR-30a; mmu-miR-367; mmu-miR-30b; mmu-miR-106a; mmu-miR-17; mmu-miR-381; mmu-miR-19b; mmu-miR-32; mmu-miR-148b; mmu-miR-136; mmu-miR-872; mmu-miR-125a-5p; mmu-miR-148a; mmu-miR-20b; mmu-miR-363-3p; mmu-miR-125b-5p; mmu-miR-101b; mmu-miR-141; mm…
ANKRD10	1.366	33	24.1581	mmu-miR-495; mmu-miR-713; mmu-miR-130a; mmu-miR-130b; mmu-miR-674; mmu-miR-340-5p; mmu-miR-155; mmu-let-7a; mmu-miR-27a; mmu-miR-103; mmu-miR-202-3p; mmu-miR-26b; mmu-miR-421; mmu-miR-195; mmu-let-7g; mmu-miR-142-3p; mmu-miR-350; mmu-miR-148b; mmu-miR-136; mmu-miR-16; mmu-miR-148a; mmu-let-7c; mmu-miR-152; mmu-miR-335-3p; mmu-miR-15a; mmu-miR-301a; mmu-let-7e; mmu-miR-142-5p; mmu-miR-26a; mmu-miR…
ANKRD12	16.557	101	6.10014	mmu-miR-145; mmu-miR-495; mmu-miR-335-5p; mmu-miR-804; mmu-miR-96; mmu-miR-431; mmu-miR-466g; mmu-miR-467c; mmu-miR-19a; mmu-miR-340-5p; mmu-miR-296-5p; mmu-miR-466b-3p; mmu-miR-28; mmu-miR-434-3p; mmu-miR-290-3p; mmu-miR-669f-3p; mmu-miR-468; mmu-miR-129-2-3p; mmu-miR-292-3p; mmu-miR-381; mmu-miR-129-1-3p; mmu-miR-302a; mmu-miR-466a-3p; mmu-miR-302d; mmu-miR-195; mmu-miR-433; mmu-miR-124; mmu-mi…
ANKRD13A	1.972	43	21.8053	mmu-miR-145; mmu-miR-29b; mmu-miR-335-5p; mmu-miR-96; mmu-miR-466g; mmu-miR-467c; mmu-miR-150; mmu-miR-296-5p; mmu-miR-291a-5p; mmu-miR-434-3p; mmu-miR-29c; mmu-miR-290-3p; mmu-miR-291b-5p; mmu-miR-669o-3p; mmu-miR-126-3p; mmu-miR-467a; mmu-miR-541; mmu-miR-182; mmu-miR-26b; mmu-miR-292-3p; mmu-miR-302a; mmu-miR-423-5p; mmu-miR-302d; mmu-miR-669a-3p; mmu-miR-124; mmu-miR-669d; mmu-miR-484; mmu-mi…
ANKRD13B	13.657	63	4.61302	mmu-miR-145; mmu-miR-29b; mmu-miR-713; mmu-miR-93; mmu-miR-431; mmu-miR-467c; mmu-miR-674; mmu-miR-20a; mmu-miR-296-5p; mmu-miR-291a-5p; mmu-miR-28; mmu-miR-434-3p; mmu-miR-29c; mmu-miR-290-3p; mmu-miR-205; mmu-miR-291b-5p; mmu-miR-126-3p; mmu-miR-467a; mmu-miR-1198-5p; mmu-miR-106a; mmu-miR-182; mmu-miR-17; mmu-miR-292-3p; mmu-miR-672; mmu-miR-302a; mmu-miR-302d; mmu-miR-195; mmu-miR-297c; mmu-m…
ANKRD13C	4.614	54	11.7035	mmu-miR-200a; mmu-miR-29b; mmu-miR-495; mmu-miR-93; mmu-miR-130a; mmu-miR-466g; mmu-miR-130b; mmu-miR-674; mmu-miR-20a; mmu-miR-467f; mmu-miR-466b-3p; mmu-miR-434-3p; mmu-miR-181a; mmu-miR-29c; mmu-miR-543; mmu-miR-367; mmu-miR-27a; mmu-miR-1198-5p; mmu-miR-1983; mmu-miR-106a; mmu-miR-468; mmu-miR-17; mmu-miR-421; mmu-miR-302a; mmu-miR-466a-3p; mmu-miR-302d; mmu-miR-32; mmu-miR-433; mmu-miR-148b;…
ANKRD13D	5.061	34	6.71804	mmu-miR-200a; mmu-miR-145; mmu-miR-335-5p; mmu-miR-804; mmu-miR-340-5p; mmu-miR-296-5p; mmu-miR-434-3p; mmu-miR-1983; mmu-miR-103; mmu-miR-182; mmu-miR-129-2-3p; mmu-miR-129-1-3p; mmu-miR-423-5p; mmu-miR-195; mmu-miR-433; mmu-miR-148b; mmu-miR-1960; mmu-miR-872; mmu-miR-16; mmu-miR-148a; mmu-miR-669d; mmu-miR-484; mmu-miR-762; mmu-miR-141; mmu-miR-152; mmu-miR-134; mmu-miR-760-3p; mmu-miR-15a; mm…
ANKRD16	9.941	57	5.73383	mmu-miR-495; mmu-miR-96; mmu-miR-200b; mmu-miR-466g; mmu-miR-150; mmu-miR-674; mmu-miR-369-3p; mmu-miR-340-5p; mmu-miR-296-5p; mmu-miR-30d; mmu-miR-466b-3p; mmu-miR-291a-5p; mmu-miR-28; mmu-miR-30a; mmu-miR-434-3p; mmu-miR-181a; mmu-miR-205; mmu-miR-155; mmu-miR-132; mmu-miR-291b-5p; mmu-miR-543; mmu-miR-669f-3p; mmu-miR-1893; mmu-miR-30b; mmu-miR-182; mmu-miR-129-2-3p; mmu-miR-421; mmu-miR-129-1…
ANKRD17	4.304	40	9.29368	mmu-miR-804; mmu-miR-93; mmu-miR-674; mmu-miR-20a; mmu-miR-466b-3p; mmu-miR-30d; mmu-miR-323-3p; mmu-miR-30a; mmu-miR-669f-3p; mmu-miR-27a; mmu-miR-30b; mmu-miR-1198-5p; mmu-miR-106a; mmu-miR-17; mmu-miR-26b; mmu-miR-154; mmu-miR-421; mmu-miR-381; mmu-miR-302a; mmu-miR-466a-3p; mmu-miR-302d; mmu-miR-142-3p; mmu-miR-350; mmu-miR-125a-5p; mmu-miR-374; mmu-miR-20b; mmu-miR-295; mmu-miR-125b-5p; mmu-…
ANKRD26	1.644	27	16.4234	mmu-miR-302d; mmu-miR-466a-3p; mmu-miR-148b; mmu-miR-1960; mmu-miR-467e; mmu-miR-429; mmu-miR-200b; mmu-miR-148a; mmu-miR-150; mmu-miR-295; mmu-miR-369-3p; mmu-miR-23b; mmu-miR-434-3p; mmu-miR-152; mmu-miR-335-3p; mmu-miR-132; mmu-miR-22; mmu-miR-467h; mmu-miR-468; mmu-miR-291a-3p; mmu-miR-26b; mmu-miR-200c; mmu-miR-26a; mmu-miR-292-5p; mmu-miR-23a; mmu-miR-302a; mmu-miR-294
ANKRD27	1.224	18	14.7059	mmu-miR-466a-3p; mmu-miR-181a; mmu-miR-330; mmu-miR-124; mmu-miR-145; mmu-miR-29a; mmu-miR-29b; mmu-miR-29c; mmu-miR-350; mmu-miR-804; mmu-miR-96; mmu-miR-191; mmu-miR-423-3p; mmu-miR-182; mmu-miR-26b; mmu-miR-340-5p; mmu-miR-26a; mmu-miR-423-5p
ANKRD28	3.502	68	19.4175	mmu-miR-145; mmu-miR-495; mmu-miR-713; mmu-miR-93; mmu-miR-96; mmu-miR-20a; mmu-miR-340-5p; mmu-miR-296-5p; mmu-miR-466b-3p; mmu-miR-28; mmu-miR-323-3p; mmu-miR-290-3p; mmu-miR-669f-3p; mmu-miR-367; mmu-let-7a; mmu-miR-106a; mmu-miR-17; mmu-miR-202-3p; mmu-miR-292-3p; mmu-miR-669a-3p; mmu-miR-466a-3p; mmu-let-7g; mmu-miR-433; mmu-miR-148b; mmu-miR-136; mmu-miR-760-5p; mmu-miR-148a; mmu-miR-20b; m…
ANKRD29	7.394	57	7.70895	mmu-miR-200a; mmu-miR-145; mmu-miR-495; mmu-miR-335-5p; mmu-miR-713; mmu-miR-130a; mmu-miR-96; mmu-miR-200b; mmu-miR-19a; mmu-miR-130b; mmu-miR-674; mmu-miR-340-5p; mmu-miR-467f; mmu-miR-30d; mmu-miR-30a; mmu-miR-323-3p; mmu-miR-21; mmu-miR-669o-5p; mmu-miR-290-3p; mmu-miR-543; mmu-miR-126-3p; mmu-miR-34a; mmu-miR-669o-3p; mmu-miR-467a; mmu-miR-1198-5p; mmu-miR-30b; mmu-miR-103; mmu-miR-292-3p; m…
ANKRD32	4.17	54	12.9496	mmu-miR-29b; mmu-miR-495; mmu-miR-713; mmu-miR-93; mmu-miR-130a; mmu-miR-96; mmu-miR-200b; mmu-miR-431; mmu-miR-467c; mmu-miR-130b; mmu-miR-369-3p; mmu-miR-20a; mmu-miR-340-5p; mmu-miR-29c; mmu-miR-290-3p; mmu-miR-543; mmu-miR-367; mmu-miR-467a; mmu-miR-1198-5p; mmu-miR-182; mmu-miR-106a; mmu-miR-17; mmu-miR-1952; mmu-miR-292-3p; mmu-miR-302a; mmu-miR-466a-3p; mmu-miR-302d; mmu-miR-32; mmu-miR-12…
ANKRD33B	28.228	107	3.79056	mmu-miR-145; mmu-miR-335-5p; mmu-miR-713; mmu-miR-93; mmu-miR-96; mmu-miR-431; mmu-miR-466g; mmu-miR-19a; mmu-miR-20a; mmu-miR-340-5p; mmu-miR-296-5p; mmu-miR-466b-3p; mmu-miR-28; mmu-miR-323-3p; mmu-miR-434-3p; mmu-miR-155; mmu-miR-290-3p; mmu-miR-29c; mmu-let-7a; mmu-miR-669f-3p; mmu-miR-191; mmu-miR-106a; mmu-miR-468; mmu-miR-129-2-3p; mmu-miR-17; mmu-miR-202-3p; mmu-miR-292-3p; mmu-miR-381; m…
ANKRD34B	6.84	55	8.04094	mmu-miR-200a; mmu-miR-93; mmu-miR-130a; mmu-miR-96; mmu-miR-200b; mmu-miR-466g; mmu-miR-130b; mmu-miR-20a; mmu-miR-296-5p; mmu-miR-466b-3p; mmu-miR-291a-5p; mmu-miR-434-3p; mmu-miR-181a; mmu-miR-205; mmu-miR-291b-5p; mmu-miR-1198-5p; mmu-miR-541; mmu-miR-106a; mmu-miR-182; mmu-miR-468; mmu-miR-17; mmu-miR-202-3p; mmu-miR-26b; mmu-miR-1952; mmu-miR-466a-3p; mmu-miR-195; mmu-miR-142-3p; mmu-miR-429…
ANKRD35	4.449	51	11.4633	mmu-miR-29b; mmu-miR-467e; mmu-miR-335-5p; mmu-miR-804; mmu-miR-431; mmu-miR-150; mmu-miR-296-5p; mmu-miR-291a-5p; mmu-miR-28; mmu-miR-434-3p; mmu-miR-21; mmu-miR-29c; mmu-miR-205; mmu-miR-291b-5p; mmu-miR-34a; mmu-miR-467h; mmu-miR-103; mmu-miR-1952; mmu-miR-195; mmu-miR-433; mmu-miR-350; mmu-miR-1960; mmu-miR-297c; mmu-miR-669l; mmu-miR-136; mmu-miR-125a-5p; mmu-miR-16; mmu-miR-760-5p; mmu-miR-…
ANKRD37	2.754	14	5.08351	mmu-miR-141; mmu-miR-32; mmu-miR-200a; mmu-miR-433; mmu-miR-367; mmu-miR-22; mmu-miR-378; mmu-miR-193b; mmu-miR-25; mmu-miR-1983; mmu-miR-363-3p; mmu-miR-150; mmu-miR-674; mmu-miR-1952
ANKRD39	4.479	52	11.6097	mmu-miR-200a; mmu-miR-145; mmu-miR-467e; mmu-miR-495; mmu-miR-335-5p; mmu-miR-713; mmu-miR-804; mmu-miR-674; mmu-miR-340-5p; mmu-miR-30d; mmu-miR-466b-3p; mmu-miR-30a; mmu-miR-323-3p; mmu-miR-181a; mmu-miR-669f-3p; mmu-miR-543; mmu-miR-34a; mmu-miR-669o-3p; mmu-miR-1198-5p; mmu-miR-30b; mmu-miR-467h; mmu-miR-541; mmu-miR-1983; mmu-miR-103; mmu-miR-26b; mmu-miR-1952; mmu-miR-154; mmu-miR-381; mmu-…
ANKRD40	4.578	33	7.20839	mmu-miR-200a; mmu-miR-145; mmu-miR-495; mmu-miR-200b; mmu-miR-369-3p; mmu-miR-340-5p; mmu-miR-543; mmu-miR-132; mmu-miR-34a; mmu-miR-27a; mmu-miR-468; mmu-miR-421; mmu-miR-302a; mmu-miR-423-5p; mmu-miR-302d; mmu-miR-148b; mmu-miR-429; mmu-miR-760-5p; mmu-miR-148a; mmu-miR-669d; mmu-miR-295; mmu-miR-101b; mmu-miR-377; mmu-miR-141; mmu-miR-152; mmu-miR-34c; mmu-miR-335-3p; mmu-miR-134; mmu-miR-760-…
ANKRD42	5.464	44	8.05271	mmu-miR-29b; mmu-miR-335-5p; mmu-miR-713; mmu-miR-96; mmu-miR-150; mmu-miR-296-5p; mmu-miR-669o-5p; mmu-miR-29c; mmu-miR-205; mmu-miR-543; mmu-let-7a; mmu-miR-1893; mmu-miR-27a; mmu-miR-103; mmu-miR-1983; mmu-miR-421; mmu-miR-423-5p; mmu-let-7g; mmu-miR-195; mmu-miR-433; mmu-miR-142-3p; mmu-miR-124; mmu-miR-297c; mmu-miR-350; mmu-miR-136; mmu-miR-16; mmu-miR-669d; mmu-let-7c; mmu-miR-741; mmu-miR…
ANKRD44	19.442	115	5.91503	mmu-miR-495; mmu-miR-335-5p; mmu-miR-713; mmu-miR-93; mmu-miR-96; mmu-miR-431; mmu-miR-466g; mmu-miR-19a; mmu-miR-20a; mmu-miR-340-5p; mmu-miR-30d; mmu-miR-466b-3p; mmu-miR-28; mmu-miR-30a; mmu-miR-323-3p; mmu-miR-155; mmu-miR-290-3p; mmu-miR-29c; mmu-let-7a; mmu-miR-367; mmu-miR-669f-3p; mmu-miR-541; mmu-miR-106a; mmu-miR-468; mmu-miR-129-2-3p; mmu-miR-17; mmu-miR-292-3p; mmu-miR-381; mmu-miR-12…
ANKRD45	2.988	77	25.7697	mmu-miR-804; mmu-miR-93; mmu-miR-96; mmu-miR-431; mmu-miR-467c; mmu-miR-20a; mmu-miR-340-5p; mmu-miR-466b-3p; mmu-miR-323-3p; mmu-miR-29c; mmu-miR-290-3p; mmu-miR-468; mmu-miR-106a; mmu-miR-17; mmu-miR-129-2-3p; mmu-miR-154; mmu-miR-292-3p; mmu-miR-381; mmu-miR-129-1-3p; mmu-miR-302a; mmu-miR-669a-3p; mmu-miR-466a-3p; mmu-miR-302d; mmu-miR-195; mmu-miR-433; mmu-miR-124; mmu-miR-148b; mmu-miR-125a…
ANKRD46	1.806	33	18.2724	mmu-miR-495; mmu-miR-431; mmu-miR-466g; mmu-miR-150; mmu-miR-340-5p; mmu-miR-466b-3p; mmu-miR-296-5p; mmu-miR-434-3p; mmu-miR-205; mmu-miR-367; mmu-miR-132; mmu-miR-129-2-3p; mmu-miR-26b; mmu-miR-672; mmu-miR-421; mmu-miR-129-1-3p; mmu-miR-195; mmu-miR-32; mmu-miR-1960; mmu-miR-136; mmu-miR-16; mmu-miR-363-3p; mmu-miR-484; mmu-miR-377; mmu-miR-466c-3p; mmu-miR-127; mmu-miR-376a; mmu-miR-15a; mmu-…
ANKRD50	18.293	106	5.79457	mmu-miR-495; mmu-miR-335-5p; mmu-miR-713; mmu-miR-804; mmu-miR-93; mmu-miR-96; mmu-miR-19a; mmu-miR-20a; mmu-miR-340-5p; mmu-miR-28; mmu-miR-323-3p; mmu-miR-29c; mmu-let-7a; mmu-miR-541; mmu-miR-468; mmu-miR-106a; mmu-miR-17; mmu-miR-154; mmu-miR-381; mmu-miR-672; mmu-miR-669a-3p; mmu-miR-195; mmu-let-7g; mmu-miR-148b; mmu-miR-136; mmu-miR-125a-5p; mmu-miR-760-5p; mmu-miR-148a; mmu-miR-20b; mmu-m…
ANKRD52	5.506	94	17.0723	mmu-miR-145; mmu-miR-335-5p; mmu-miR-713; mmu-miR-93; mmu-miR-96; mmu-miR-431; mmu-miR-467c; mmu-miR-20a; mmu-miR-30d; mmu-miR-466b-3p; mmu-miR-28; mmu-miR-30a; mmu-miR-29c; mmu-miR-290-3p; mmu-miR-669f-3p; mmu-let-7a; mmu-miR-541; mmu-miR-106a; mmu-miR-129-2-3p; mmu-miR-17; mmu-miR-202-3p; mmu-miR-154; mmu-miR-292-3p; mmu-miR-129-1-3p; mmu-miR-302a; mmu-miR-669a-3p; mmu-miR-302d; mmu-let-7g; mmu…
ANKRD53	0.937	16	17.0758	mmu-miR-200a; mmu-miR-93; mmu-miR-20b; mmu-miR-20a; mmu-miR-291a-5p; mmu-miR-323-3p; mmu-miR-151-5p; mmu-miR-141; mmu-miR-335-3p; mmu-miR-291b-5p; mmu-miR-376a; mmu-miR-106b; mmu-miR-106a; mmu-miR-17; mmu-miR-381; mmu-miR-292-5p
ANKRD54	5.682	29	5.10384	mmu-let-7g; mmu-miR-302d; mmu-miR-142-3p; mmu-miR-148b; mmu-miR-350; mmu-miR-136; mmu-miR-148a; mmu-miR-466g; mmu-miR-760-5p; mmu-miR-295; mmu-miR-674; mmu-miR-720; mmu-miR-296-5p; mmu-miR-762; mmu-let-7c; mmu-miR-28; mmu-miR-741; mmu-miR-152; mmu-let-7a; mmu-miR-760-3p; mmu-miR-1893; mmu-miR-376a; mmu-miR-1983; mmu-let-7e; mmu-miR-103; mmu-miR-291a-3p; mmu-miR-1935; mmu-miR-302a; mmu-miR-294
ANKRD6	14.925	57	3.8191	mmu-miR-200a; mmu-miR-29b; mmu-miR-495; mmu-miR-335-5p; mmu-miR-96; mmu-miR-200b; mmu-miR-150; mmu-miR-674; mmu-miR-291a-5p; mmu-miR-28; mmu-miR-323-3p; mmu-miR-29c; mmu-miR-205; mmu-miR-155; mmu-let-7a; mmu-miR-291b-5p; mmu-miR-669f-3p; mmu-miR-543; mmu-miR-34a; mmu-miR-27a; mmu-miR-1198-5p; mmu-miR-202-3p; mmu-miR-1952; mmu-miR-381; mmu-let-7g; mmu-miR-433; mmu-miR-350; mmu-miR-124; mmu-miR-148…
ANKRD63	4.861	63	12.9603	mmu-miR-200a; mmu-miR-145; mmu-miR-29b; mmu-miR-335-5p; mmu-miR-713; mmu-miR-804; mmu-miR-431; mmu-miR-467c; mmu-miR-674; mmu-miR-30d; mmu-miR-296-5p; mmu-miR-28; mmu-miR-30a; mmu-miR-434-3p; mmu-miR-205; mmu-miR-29c; mmu-miR-290-3p; mmu-miR-1893; mmu-miR-467a; mmu-miR-191; mmu-miR-1198-5p; mmu-miR-30b; mmu-miR-103; mmu-miR-129-2-3p; mmu-miR-26b; mmu-miR-1952; mmu-miR-292-3p; mmu-miR-129-1-3p; mm…
ANKRD9	8.378	36	4.29697	mmu-miR-93; mmu-miR-20a; mmu-miR-28; mmu-miR-290-3p; mmu-miR-34a; mmu-miR-467a; mmu-miR-27a; mmu-miR-103; mmu-miR-106a; mmu-miR-129-2-3p; mmu-miR-17; mmu-miR-292-3p; mmu-miR-129-1-3p; mmu-miR-195; mmu-miR-142-3p; mmu-miR-125a-5p; mmu-miR-16; mmu-miR-1198-3p; mmu-miR-20b; mmu-miR-125b-5p; mmu-miR-23b; mmu-miR-762; mmu-miR-101b; mmu-miR-151-5p; mmu-miR-377; mmu-miR-34c; mmu-miR-760-3p; mmu-miR-22; …
ANKS1	9.921	47	4.73743	mmu-miR-335-5p; mmu-miR-713; mmu-miR-431; mmu-miR-674; mmu-miR-291a-5p; mmu-miR-28; mmu-miR-290-3p; mmu-miR-205; mmu-miR-543; mmu-miR-291b-5p; mmu-miR-132; mmu-miR-669o-3p; mmu-miR-34a; mmu-miR-467a; mmu-miR-27a; mmu-miR-1198-5p; mmu-miR-103; mmu-miR-26b; mmu-miR-1952; mmu-miR-292-3p; mmu-miR-669a-3p; mmu-miR-195; mmu-miR-142-3p; mmu-miR-124; mmu-miR-1960; mmu-miR-136; mmu-miR-16; mmu-miR-1198-3p…
ANKS1B	7.836	26	3.31802	mmu-miR-466a-3p; mmu-miR-124; mmu-miR-350; mmu-miR-495; mmu-miR-93; mmu-miR-669d; mmu-miR-20b; mmu-miR-20a; mmu-miR-720; mmu-miR-466b-3p; mmu-miR-323-3p; mmu-miR-466c-3p; mmu-miR-155; mmu-miR-669f-3p; mmu-miR-543; mmu-miR-106b; mmu-miR-541; mmu-miR-106a; mmu-miR-17; mmu-miR-26b; mmu-miR-421; mmu-miR-381; mmu-miR-26a; mmu-miR-1935; mmu-miR-292-5p; mmu-miR-410
ANKS3	0.472	8	16.9492	mmu-miR-22; mmu-miR-136; mmu-miR-183; mmu-miR-431; mmu-miR-466g; mmu-miR-1952; mmu-miR-33; mmu-miR-762
ANKS6	4.087	28	6.85099	mmu-miR-145; mmu-miR-29b; mmu-miR-335-5p; mmu-miR-804; mmu-miR-96; mmu-miR-125a-5p; mmu-miR-760-5p; mmu-miR-484; mmu-miR-674; mmu-miR-23b; mmu-miR-125b-5p; mmu-miR-762; mmu-miR-377; mmu-miR-669o-5p; mmu-miR-330; mmu-miR-34c; mmu-miR-29c; mmu-miR-29a; mmu-miR-760-3p; mmu-miR-34a; mmu-miR-382; mmu-miR-532-5p; mmu-miR-468; mmu-miR-1952; mmu-miR-1935; mmu-miR-23a; mmu-miR-292-5p; mmu-miR-410
ANKZF1	2.028	26	12.8205	mmu-let-7g; mmu-miR-433; mmu-miR-145; mmu-miR-29b; mmu-miR-429; mmu-miR-136; mmu-miR-200b; mmu-miR-150; mmu-miR-674; mmu-miR-18b; mmu-miR-762; mmu-let-7c; mmu-miR-101b; mmu-miR-21; mmu-miR-29a; mmu-miR-29c; mmu-miR-205; mmu-let-7a; mmu-miR-22; mmu-miR-193b; mmu-miR-423-3p; mmu-let-7e; mmu-miR-376b; mmu-miR-200c; mmu-miR-329; mmu-miR-672
ANLN	1.96	35	17.8571	mmu-miR-200b; mmu-miR-369-3p; mmu-miR-340-5p; mmu-miR-466b-3p; mmu-miR-30d; mmu-miR-30a; mmu-miR-181a; mmu-miR-21; mmu-miR-205; mmu-miR-669f-3p; mmu-miR-543; mmu-miR-30b; mmu-miR-1983; mmu-miR-672; mmu-miR-466a-3p; mmu-miR-142-3p; mmu-miR-429; mmu-miR-374; mmu-miR-1198-3p; mmu-miR-484; mmu-miR-18b; mmu-miR-23b; mmu-miR-376c; mmu-miR-377; mmu-miR-466c-3p; mmu-miR-330; mmu-miR-335-3p; mmu-miR-134; …
ANO10	0.6	8	13.3333	mmu-miR-669a-3p; mmu-miR-205; mmu-miR-134; mmu-miR-669o-3p; mmu-miR-541; mmu-miR-484; mmu-miR-377; mmu-miR-741
ANO5	5.086	97	19.072	mmu-miR-495; mmu-miR-713; mmu-miR-804; mmu-miR-93; mmu-miR-431; mmu-miR-20a; mmu-miR-340-5p; mmu-miR-466b-3p; mmu-miR-30d; mmu-miR-30a; mmu-miR-434-3p; mmu-miR-29c; mmu-miR-155; mmu-miR-669f-3p; mmu-let-7a; mmu-miR-541; mmu-miR-106a; mmu-miR-17; mmu-miR-129-2-3p; mmu-miR-202-3p; mmu-miR-381; mmu-miR-129-1-3p; mmu-miR-302a; mmu-miR-466a-3p; mmu-miR-302d; mmu-let-7g; mmu-miR-433; mmu-miR-124; mmu-m…
ANO6	2.97	48	16.1616	mmu-miR-200a; mmu-miR-145; mmu-miR-713; mmu-miR-93; mmu-miR-96; mmu-miR-200b; mmu-miR-19a; mmu-miR-20a; mmu-miR-291a-5p; mmu-miR-28; mmu-miR-323-3p; mmu-miR-669f-3p; mmu-miR-291b-5p; mmu-let-7a; mmu-miR-27a; mmu-miR-191; mmu-miR-182; mmu-miR-106a; mmu-miR-17; mmu-miR-202-3p; mmu-miR-1952; mmu-miR-302a; mmu-miR-19b; mmu-miR-302d; mmu-let-7g; mmu-miR-350; mmu-miR-124; mmu-miR-429; mmu-miR-125a-5p; …
ANO8	0.899	9	10.0111	mmu-miR-32; mmu-miR-367; mmu-miR-1893; mmu-miR-293; mmu-miR-25; mmu-miR-363-3p; mmu-miR-1224; mmu-miR-33; mmu-miR-296-5p
ANO9	0.888	15	16.8919	mmu-miR-466a-3p; mmu-miR-466c-3p; mmu-miR-127; mmu-miR-669f-3p; mmu-miR-293; mmu-miR-335-5p; mmu-miR-376a; mmu-miR-431; mmu-miR-760-5p; mmu-miR-484; mmu-miR-329; mmu-miR-381; mmu-miR-1952; mmu-miR-467f; mmu-miR-466b-3p
ANP32A	2.518	26	10.3257	mmu-miR-32; mmu-miR-124; mmu-miR-297c; mmu-miR-495; mmu-miR-804; mmu-miR-93; mmu-miR-466g; mmu-miR-363-3p; mmu-miR-20b; mmu-miR-20a; mmu-miR-34c; mmu-miR-330; mmu-miR-1945; mmu-miR-760-3p; mmu-miR-367; mmu-miR-132; mmu-miR-34a; mmu-miR-106b; mmu-miR-25; mmu-miR-1983; mmu-miR-106a; mmu-miR-17; mmu-miR-33; mmu-miR-142-5p; mmu-miR-297a; mmu-miR-1935
ANP32B	0.571	8	14.0105	mmu-miR-182; mmu-miR-34c; mmu-miR-760-3p; mmu-miR-34a; mmu-miR-421; mmu-miR-96; mmu-miR-191; mmu-miR-377
ANP32E	13.479	43	3.19015	mmu-miR-200a; mmu-miR-150; mmu-miR-674; mmu-miR-467f; mmu-miR-340-5p; mmu-miR-291a-5p; mmu-miR-323-3p; mmu-miR-434-3p; mmu-miR-181a; mmu-miR-290-3p; mmu-miR-205; mmu-miR-367; mmu-miR-291b-5p; mmu-miR-132; mmu-miR-467a; mmu-miR-27a; mmu-miR-129-2-3p; mmu-miR-292-3p; mmu-miR-129-1-3p; mmu-miR-423-5p; mmu-miR-466a-3p; mmu-miR-195; mmu-miR-32; mmu-miR-1960; mmu-miR-136; mmu-miR-16; mmu-miR-484; mmu-m…
ANPEP	2.237	23	10.2816	mmu-let-7g; mmu-miR-96; mmu-miR-125a-5p; mmu-miR-669d; mmu-miR-484; mmu-miR-125b-5p; mmu-let-7c; mmu-miR-101b; mmu-miR-741; mmu-miR-28; mmu-miR-1196; mmu-miR-34c; mmu-miR-21; mmu-miR-205; mmu-miR-760-3p; mmu-let-7a; mmu-miR-22; mmu-miR-34a; mmu-let-7e; mmu-miR-329; mmu-miR-202-3p; mmu-miR-1224; mmu-miR-1935
ANTXR1	3.502	61	17.4186	mmu-miR-29b; mmu-miR-335-5p; mmu-miR-713; mmu-miR-93; mmu-miR-200b; mmu-miR-19a; mmu-miR-674; mmu-miR-20a; mmu-miR-467f; mmu-miR-30d; mmu-miR-466b-3p; mmu-miR-291a-5p; mmu-miR-28; mmu-miR-30a; mmu-miR-29c; mmu-miR-669f-3p; mmu-miR-291b-5p; mmu-miR-34a; mmu-miR-669o-3p; mmu-miR-1198-5p; mmu-miR-30b; mmu-miR-541; mmu-miR-106a; mmu-miR-17; mmu-miR-381; mmu-miR-672; mmu-miR-19b; mmu-miR-423-5p; mmu-m…
ANTXR2	3.818	69	18.0723	mmu-miR-145; mmu-miR-495; mmu-miR-713; mmu-miR-96; mmu-miR-431; mmu-miR-466g; mmu-miR-19a; mmu-miR-340-5p; mmu-miR-466b-3p; mmu-miR-434-3p; mmu-miR-29c; mmu-miR-155; mmu-miR-669f-3p; mmu-miR-129-2-3p; mmu-miR-381; mmu-miR-129-1-3p; mmu-miR-669a-3p; mmu-miR-433; mmu-miR-124; mmu-miR-148b; mmu-miR-669l; mmu-miR-136; mmu-miR-125a-5p; mmu-miR-148a; mmu-miR-669f-5p; mmu-miR-125b-5p; mmu-miR-23b; mmu-m…
ANXA11	0.794	14	17.6322	mmu-miR-181a; mmu-miR-124; mmu-miR-495; mmu-miR-804; mmu-miR-96; mmu-miR-125a-5p; mmu-miR-466g; mmu-miR-182; mmu-miR-125b-5p; mmu-miR-296-5p; mmu-miR-323-3p; mmu-miR-101b; mmu-miR-423-5p; mmu-miR-741
ANXA2	0.7	7	10	mmu-miR-182; mmu-miR-129-2-3p; mmu-miR-129-1-3p; mmu-miR-96; mmu-miR-101b; mmu-miR-28; mmu-miR-431
ANXA3	0.468	12	25.641	mmu-miR-32; mmu-miR-434-3p; mmu-miR-367; mmu-miR-335-5p; mmu-miR-713; mmu-miR-96; mmu-miR-431; mmu-miR-25; mmu-miR-363-3p; mmu-miR-33; mmu-miR-1952; mmu-miR-101b
ANXA4	6.806	25	3.67323	mmu-miR-433; mmu-miR-124; mmu-miR-148b; mmu-miR-1960; mmu-miR-297c; mmu-miR-148a; mmu-miR-431; mmu-miR-669d; mmu-miR-340-5p; mmu-miR-152; mmu-miR-181a; mmu-miR-155; mmu-miR-205; mmu-miR-132; mmu-miR-468; mmu-miR-1983; mmu-miR-129-2-3p; mmu-miR-26b; mmu-miR-142-5p; mmu-miR-33; mmu-miR-381; mmu-miR-297a; mmu-miR-26a; mmu-miR-1935; mmu-miR-129-1-3p
ANXA5	0.482	8	16.5975	mmu-miR-195; mmu-miR-376b; mmu-miR-124; mmu-miR-350; mmu-miR-15a; mmu-miR-15b; mmu-miR-16; mmu-miR-741
ANXA6	2.513	27	10.7441	mmu-miR-195; mmu-miR-433; mmu-miR-124; mmu-miR-297c; mmu-miR-16; mmu-miR-431; mmu-miR-720; mmu-miR-101b; mmu-miR-28; mmu-miR-434-3p; mmu-miR-330; mmu-miR-335-3p; mmu-miR-205; mmu-miR-293; mmu-miR-15a; mmu-miR-193b; mmu-miR-183; mmu-miR-103; mmu-miR-376b; mmu-miR-129-2-3p; mmu-miR-26b; mmu-miR-26a; mmu-miR-1935; mmu-miR-129-1-3p; mmu-miR-297a; mmu-miR-15b; mmu-miR-292-5p
AOX1	0.484	12	24.7934	mmu-miR-127; mmu-miR-145; mmu-miR-1960; mmu-miR-335-5p; mmu-miR-382; mmu-miR-374; mmu-miR-19a; mmu-miR-484; mmu-miR-381; mmu-miR-762; mmu-miR-377; mmu-miR-19b
AP1AR	1.49	27	18.1208	mmu-miR-148b; mmu-miR-1960; mmu-miR-297c; mmu-miR-350; mmu-miR-495; mmu-miR-713; mmu-miR-148a; mmu-miR-431; mmu-miR-466g; mmu-miR-760-5p; mmu-miR-150; mmu-miR-674; mmu-miR-340-5p; mmu-miR-466b-3p; mmu-miR-291a-5p; mmu-miR-466c-3p; mmu-miR-152; mmu-miR-181a; mmu-miR-127; mmu-miR-291b-5p; mmu-miR-27a; mmu-miR-378; mmu-miR-99b; mmu-miR-103; mmu-miR-142-5p; mmu-miR-297a; mmu-miR-1935
AP1B1	3.222	27	8.37989	mmu-miR-466a-3p; mmu-miR-713; mmu-miR-136; mmu-miR-96; mmu-miR-760-5p; mmu-miR-484; mmu-miR-674; mmu-miR-762; mmu-miR-291a-5p; mmu-miR-377; mmu-miR-330; mmu-miR-34c; mmu-miR-760-3p; mmu-miR-669f-3p; mmu-miR-291b-5p; mmu-miR-34a; mmu-miR-378; mmu-miR-193b; mmu-miR-541; mmu-miR-468; mmu-miR-129-2-3p; mmu-miR-1224; mmu-miR-421; mmu-miR-381; mmu-miR-1952; mmu-miR-129-1-3p; mmu-miR-1935
AP1G1	1.096	51	46.5328	mmu-miR-145; mmu-miR-29b; mmu-miR-495; mmu-miR-93; mmu-miR-130a; mmu-miR-466g; mmu-miR-431; mmu-miR-19a; mmu-miR-130b; mmu-miR-150; mmu-miR-20a; mmu-miR-674; mmu-miR-466b-3p; mmu-miR-434-3p; mmu-miR-181a; mmu-miR-205; mmu-miR-29c; mmu-miR-543; mmu-miR-191; mmu-miR-106a; mmu-miR-129-2-3p; mmu-miR-17; mmu-miR-421; mmu-miR-381; mmu-miR-129-1-3p; mmu-miR-19b; mmu-miR-423-5p; mmu-miR-466a-3p; mmu-miR-…
AP1G2	15.634	42	2.68645	mmu-miR-713; mmu-miR-93; mmu-miR-466g; mmu-miR-20a; mmu-miR-21; mmu-miR-290-3p; mmu-miR-34a; mmu-miR-467a; mmu-miR-27a; mmu-miR-106a; mmu-miR-103; mmu-miR-17; mmu-miR-292-3p; mmu-miR-1952; mmu-miR-195; mmu-miR-433; mmu-miR-124; mmu-miR-1960; mmu-miR-125a-5p; mmu-miR-16; mmu-miR-760-5p; mmu-miR-484; mmu-miR-20b; mmu-miR-720; mmu-miR-125b-5p; mmu-miR-18b; mmu-miR-762; mmu-miR-330; mmu-miR-34c; mmu-…
AP1M1	0.651	27	41.4747	mmu-miR-302d; mmu-miR-200a; mmu-miR-467e; mmu-miR-495; mmu-miR-804; mmu-miR-125a-5p; mmu-miR-466g; mmu-miR-467c; mmu-miR-484; mmu-miR-295; mmu-miR-125b-5p; mmu-miR-762; mmu-miR-377; mmu-miR-141; mmu-miR-291b-3p; mmu-miR-290-3p; mmu-miR-22; mmu-miR-467a; mmu-miR-467h; mmu-miR-103; mmu-miR-291a-3p; mmu-miR-1224; mmu-miR-292-3p; mmu-miR-1935; mmu-miR-302a; mmu-miR-294; mmu-miR-410
AP1M2	0.796	9	11.3065	mmu-miR-152; mmu-miR-124; mmu-miR-148b; mmu-miR-1960; mmu-miR-350; mmu-miR-1198-5p; mmu-miR-148a; mmu-miR-296-5p; mmu-miR-741
AP1S1	1.736	21	12.0968	mmu-let-7g; mmu-miR-302d; mmu-miR-431; mmu-miR-674; mmu-miR-295; mmu-miR-18b; mmu-miR-762; mmu-miR-296-5p; mmu-let-7c; mmu-miR-741; mmu-let-7a; mmu-miR-1893; mmu-miR-22; mmu-miR-103; mmu-let-7e; mmu-miR-291a-3p; mmu-miR-142-5p; mmu-miR-1935; mmu-miR-302a; mmu-miR-292-5p; mmu-miR-294
AP1S3	7.513	45	5.98962	mmu-miR-29b; mmu-miR-335-5p; mmu-miR-96; mmu-miR-431; mmu-miR-466g; mmu-miR-19a; mmu-miR-369-3p; mmu-miR-340-5p; mmu-miR-467f; mmu-miR-291a-5p; mmu-miR-28; mmu-miR-323-3p; mmu-miR-181a; mmu-miR-29c; mmu-miR-155; mmu-miR-132; mmu-miR-291b-5p; mmu-miR-367; mmu-miR-669f-3p; mmu-miR-543; mmu-miR-27a; mmu-miR-182; mmu-miR-103; mmu-miR-26b; mmu-miR-1952; mmu-miR-381; mmu-miR-421; mmu-miR-19b; mmu-miR-4…
AP2A1	4.784	34	7.10702	mmu-miR-200a; mmu-miR-467e; mmu-miR-130a; mmu-miR-130b; mmu-miR-369-3p; mmu-miR-30d; mmu-miR-296-5p; mmu-miR-30a; mmu-miR-434-3p; mmu-miR-1893; mmu-miR-27a; mmu-miR-30b; mmu-miR-467h; mmu-miR-103; mmu-miR-672; mmu-miR-1952; mmu-miR-195; mmu-miR-148b; mmu-miR-16; mmu-miR-148a; mmu-miR-484; mmu-miR-762; mmu-miR-151-5p; mmu-miR-377; mmu-miR-141; mmu-miR-152; mmu-miR-22; mmu-miR-293; mmu-miR-15a; mmu…
AP2A2	1.72	36	20.9302	mmu-miR-200a; mmu-miR-145; mmu-miR-335-5p; mmu-miR-130a; mmu-miR-200b; mmu-miR-466g; mmu-miR-130b; mmu-miR-467f; mmu-miR-466b-3p; mmu-miR-323-3p; mmu-miR-434-3p; mmu-miR-181a; mmu-miR-34a; mmu-miR-27a; mmu-miR-541; mmu-miR-129-2-3p; mmu-miR-129-1-3p; mmu-miR-466a-3p; mmu-miR-148b; mmu-miR-1960; mmu-miR-429; mmu-miR-148a; mmu-miR-484; mmu-miR-720; mmu-miR-23b; mmu-miR-762; mmu-miR-741; mmu-miR-141…
AP2B1	4.932	44	8.92133	mmu-miR-200a; mmu-miR-145; mmu-miR-29b; mmu-miR-335-5p; mmu-miR-713; mmu-miR-96; mmu-miR-19a; mmu-miR-150; mmu-miR-674; mmu-miR-291a-5p; mmu-miR-29c; mmu-miR-290-3p; mmu-miR-291b-5p; mmu-miR-132; mmu-miR-669o-3p; mmu-miR-467a; mmu-miR-1198-5p; mmu-miR-468; mmu-miR-292-3p; mmu-miR-421; mmu-miR-19b; mmu-miR-669a-3p; mmu-miR-195; mmu-miR-142-3p; mmu-miR-350; mmu-miR-125a-5p; mmu-miR-16; mmu-miR-484;…
AP2M1	3.198	31	9.69356	mmu-miR-195; mmu-miR-200a; mmu-miR-148b; mmu-miR-1960; mmu-miR-350; mmu-miR-713; mmu-miR-125a-5p; mmu-miR-16; mmu-miR-1198-3p; mmu-miR-148a; mmu-miR-674; mmu-miR-125b-5p; mmu-miR-23b; mmu-miR-296-5p; mmu-miR-376c; mmu-miR-377; mmu-miR-741; mmu-miR-141; mmu-miR-152; mmu-miR-543; mmu-miR-15a; mmu-miR-193b; mmu-miR-183; mmu-miR-26b; mmu-miR-329; mmu-miR-381; mmu-miR-26a; mmu-miR-23a; mmu-miR-15b; mm…
AP2S1	0.379	12	31.6623	mmu-miR-330; mmu-miR-34c; mmu-miR-127; mmu-miR-34a; mmu-miR-30b; mmu-miR-183; mmu-miR-103; mmu-miR-329; mmu-miR-30d; mmu-miR-762; mmu-miR-1935; mmu-miR-30a
AP3B1	0.712	25	35.1124	mmu-miR-195; mmu-miR-433; mmu-miR-669l; mmu-miR-713; mmu-miR-16; mmu-miR-872; mmu-miR-669f-5p; mmu-miR-23b; mmu-miR-340-5p; mmu-miR-762; mmu-miR-291a-5p; mmu-miR-151-5p; mmu-miR-377; mmu-miR-205; mmu-miR-134; mmu-miR-291b-5p; mmu-miR-22; mmu-miR-669a-5p; mmu-miR-15a; mmu-miR-103; mmu-miR-1935; mmu-miR-292-5p; mmu-miR-15b; mmu-miR-23a; mmu-miR-423-5p
AP3B2	4.232	41	9.68809	mmu-miR-145; mmu-miR-804; mmu-miR-431; mmu-miR-150; mmu-miR-466b-3p; mmu-miR-205; mmu-miR-155; mmu-miR-132; mmu-miR-34a; mmu-miR-1893; mmu-miR-27a; mmu-miR-468; mmu-miR-1983; mmu-miR-103; mmu-miR-129-2-3p; mmu-miR-1952; mmu-miR-129-1-3p; mmu-miR-423-5p; mmu-miR-195; mmu-miR-433; mmu-miR-124; mmu-miR-1960; mmu-miR-136; mmu-miR-16; mmu-miR-484; mmu-miR-720; mmu-miR-23b; mmu-miR-376c; mmu-miR-741; m…
AP3D1	1.006	33	32.8032	mmu-miR-713; mmu-miR-93; mmu-miR-674; mmu-miR-20a; mmu-miR-291a-5p; mmu-miR-155; mmu-miR-367; mmu-miR-291b-5p; mmu-miR-106a; mmu-miR-103; mmu-miR-1983; mmu-miR-17; mmu-miR-421; mmu-miR-1952; mmu-miR-195; mmu-miR-32; mmu-miR-142-3p; mmu-miR-124; mmu-miR-136; mmu-miR-16; mmu-miR-20b; mmu-miR-363-3p; mmu-miR-23b; mmu-miR-101b; mmu-miR-377; mmu-miR-15a; mmu-miR-378; mmu-miR-106b; mmu-miR-25; mmu-miR-…
AP3M1	33.495	105	3.1348	mmu-miR-145; mmu-miR-495; mmu-miR-335-5p; mmu-miR-96; mmu-miR-466g; mmu-miR-467c; mmu-miR-340-5p; mmu-miR-30d; mmu-miR-466b-3p; mmu-miR-30a; mmu-miR-323-3p; mmu-miR-21; mmu-miR-29c; mmu-miR-290-3p; mmu-miR-155; mmu-miR-367; mmu-let-7a; mmu-miR-202-3p; mmu-miR-154; mmu-miR-292-3p; mmu-miR-381; mmu-miR-672; mmu-miR-302a; mmu-miR-466a-3p; mmu-miR-302d; mmu-let-7g; mmu-miR-195; mmu-miR-433; mmu-miR-1…
AP3M2	2.1	34	16.1905	mmu-miR-466a-3p; mmu-miR-32; mmu-miR-302d; mmu-miR-350; mmu-miR-1960; mmu-miR-148b; mmu-miR-467e; mmu-miR-148a; mmu-miR-466g; mmu-miR-467c; mmu-miR-363-3p; mmu-miR-150; mmu-miR-295; mmu-miR-674; mmu-miR-377; mmu-miR-291b-3p; mmu-miR-34c; mmu-miR-152; mmu-miR-205; mmu-miR-290-3p; mmu-miR-134; mmu-miR-669f-3p; mmu-miR-367; mmu-miR-34a; mmu-miR-467a; mmu-miR-532-5p; mmu-miR-467h; mmu-miR-25; mmu-miR…
AP3S1	0.93	23	24.7312	mmu-miR-466a-3p; mmu-miR-200a; mmu-miR-145; mmu-miR-335-5p; mmu-miR-429; mmu-miR-96; mmu-miR-200b; mmu-miR-150; mmu-miR-674; mmu-miR-30d; mmu-miR-466b-3p; mmu-miR-762; mmu-miR-101b; mmu-miR-30a; mmu-miR-466c-3p; mmu-miR-141; mmu-miR-335-3p; mmu-miR-205; mmu-miR-132; mmu-miR-30b; mmu-miR-532-5p; mmu-miR-182; mmu-miR-200c
AP3S2	5.288	88	16.6415	mmu-miR-145; mmu-miR-495; mmu-miR-335-5p; mmu-miR-713; mmu-miR-804; mmu-miR-93; mmu-miR-431; mmu-miR-466g; mmu-miR-20a; mmu-miR-296-5p; mmu-miR-434-3p; mmu-miR-29c; mmu-miR-290-3p; mmu-miR-669f-3p; mmu-let-7a; mmu-miR-106a; mmu-miR-17; mmu-miR-129-2-3p; mmu-miR-202-3p; mmu-miR-154; mmu-miR-292-3p; mmu-miR-672; mmu-miR-129-1-3p; mmu-miR-302a; mmu-miR-669a-3p; mmu-miR-302d; mmu-let-7g; mmu-miR-195;…
AP4B1	2.76	21	7.6087	mmu-let-7g; mmu-miR-466a-3p; mmu-miR-713; mmu-miR-669d; mmu-miR-484; mmu-miR-674; mmu-miR-30d; mmu-let-7c; mmu-miR-30a; mmu-miR-181a; mmu-miR-290-3p; mmu-let-7a; mmu-miR-27a; mmu-miR-378; mmu-miR-467a; mmu-miR-30b; mmu-miR-541; mmu-let-7e; mmu-miR-202-3p; mmu-miR-292-3p; mmu-miR-292-5p
AP4E1	5.655	90	15.9151	mmu-miR-495; mmu-miR-804; mmu-miR-93; mmu-miR-96; mmu-miR-431; mmu-miR-467c; mmu-miR-19a; mmu-miR-20a; mmu-miR-340-5p; mmu-miR-30d; mmu-miR-466b-3p; mmu-miR-28; mmu-miR-30a; mmu-miR-21; mmu-miR-155; mmu-miR-29c; mmu-miR-290-3p; mmu-let-7a; mmu-miR-669f-3p; mmu-miR-106a; mmu-miR-129-2-3p; mmu-miR-17; mmu-miR-154; mmu-miR-292-3p; mmu-miR-381; mmu-miR-672; mmu-miR-129-1-3p; mmu-miR-302a; mmu-miR-669…
AP4S1	0.387	4	10.3359	mmu-miR-760-3p; mmu-miR-27a; mmu-miR-292-5p; mmu-miR-423-5p
APAF1	12.364	69	5.58072	mmu-miR-145; mmu-miR-93; mmu-miR-96; mmu-miR-19a; mmu-miR-20a; mmu-miR-340-5p; mmu-miR-30d; mmu-miR-28; mmu-miR-323-3p; mmu-miR-30a; mmu-miR-29c; mmu-miR-155; mmu-miR-669f-3p; mmu-miR-367; mmu-let-7a; mmu-miR-106a; mmu-miR-17; mmu-miR-381; mmu-miR-672; mmu-miR-669a-3p; mmu-let-7g; mmu-miR-148b; mmu-miR-136; mmu-miR-148a; mmu-miR-20b; mmu-miR-23b; mmu-miR-377; mmu-miR-1196; mmu-miR-34c; mmu-miR-15…
APBA1	4.634	74	15.9689	mmu-miR-145; mmu-miR-495; mmu-miR-335-5p; mmu-miR-466g; mmu-miR-19a; mmu-miR-340-5p; mmu-miR-296-5p; mmu-miR-466b-3p; mmu-miR-30d; mmu-miR-28; mmu-miR-30a; mmu-miR-323-3p; mmu-miR-669f-3p; mmu-let-7a; mmu-miR-541; mmu-miR-468; mmu-miR-154; mmu-miR-381; mmu-miR-302a; mmu-miR-302d; mmu-let-7g; mmu-miR-195; mmu-miR-433; mmu-miR-125a-5p; mmu-miR-295; mmu-miR-23b; mmu-miR-125b-5p; mmu-miR-377; mmu-miR…
APBA2	3.279	15	4.57457	mmu-miR-195; mmu-miR-181a; mmu-miR-205; mmu-miR-350; mmu-miR-15a; mmu-miR-27a; mmu-miR-96; mmu-miR-16; mmu-miR-329; mmu-miR-672; mmu-miR-23b; mmu-miR-1935; mmu-miR-296-5p; mmu-miR-23a; mmu-miR-15b
APBA3	0.198	4	20.202	mmu-miR-124; mmu-miR-1224; mmu-miR-369-3p; mmu-miR-381
APBB1IP	0.854	6	7.02576	mmu-miR-433; mmu-miR-335-3p; mmu-miR-18b; mmu-miR-421; mmu-miR-378; mmu-miR-323-3p
APBB2	37.636	97	2.57732	mmu-miR-495; mmu-miR-335-5p; mmu-miR-804; mmu-miR-93; mmu-miR-431; mmu-miR-466g; mmu-miR-467c; mmu-miR-19a; mmu-miR-20a; mmu-miR-340-5p; mmu-miR-30d; mmu-miR-466b-3p; mmu-miR-28; mmu-miR-30a; mmu-miR-290-3p; mmu-miR-367; mmu-miR-1893; mmu-miR-106a; mmu-miR-17; mmu-miR-154; mmu-miR-292-3p; mmu-miR-381; mmu-miR-672; mmu-miR-302a; mmu-miR-466a-3p; mmu-miR-302d; mmu-miR-195; mmu-miR-433; mmu-miR-124;…
APC	31.274	114	3.6452	mmu-miR-145; mmu-miR-495; mmu-miR-713; mmu-miR-804; mmu-miR-96; mmu-miR-431; mmu-miR-466g; mmu-miR-19a; mmu-miR-340-5p; mmu-miR-296-5p; mmu-miR-30d; mmu-miR-466b-3p; mmu-miR-28; mmu-miR-30a; mmu-miR-323-3p; mmu-miR-434-3p; mmu-miR-155; mmu-miR-290-3p; mmu-miR-29c; mmu-miR-669f-3p; mmu-miR-541; mmu-miR-129-2-3p; mmu-miR-202-3p; mmu-miR-292-3p; mmu-miR-381; mmu-miR-672; mmu-miR-129-1-3p; mmu-miR-30…
APC2	14.462	64	4.42539	mmu-miR-145; mmu-miR-335-5p; mmu-miR-713; mmu-miR-431; mmu-miR-296-5p; mmu-miR-28; mmu-miR-21; mmu-let-7a; mmu-miR-202-3p; mmu-miR-672; mmu-let-7g; mmu-miR-195; mmu-miR-433; mmu-miR-148b; mmu-miR-669l; mmu-miR-136; mmu-miR-125a-5p; mmu-miR-760-5p; mmu-miR-148a; mmu-miR-669f-5p; mmu-miR-720; mmu-miR-23b; mmu-miR-125b-5p; mmu-miR-34c; mmu-miR-330; mmu-miR-152; mmu-miR-127; mmu-miR-134; mmu-miR-22; …
APCDD1	3.966	58	14.6243	mmu-miR-145; mmu-miR-29b; mmu-miR-713; mmu-miR-93; mmu-miR-130a; mmu-miR-431; mmu-miR-130b; mmu-miR-369-3p; mmu-miR-20a; mmu-miR-340-5p; mmu-miR-28; mmu-miR-669o-5p; mmu-miR-181a; mmu-miR-29c; mmu-miR-205; mmu-let-7a; mmu-miR-1198-5p; mmu-miR-541; mmu-miR-106a; mmu-miR-468; mmu-miR-17; mmu-miR-202-3p; mmu-miR-26b; mmu-miR-1952; mmu-miR-421; mmu-let-7g; mmu-miR-195; mmu-miR-350; mmu-miR-669l; mmu-…
APEH	0.261	5	19.1571	mmu-miR-433; mmu-miR-350; mmu-miR-1952; mmu-miR-22; mmu-miR-335-5p
APEX1	1.368	9	6.57895	mmu-miR-433; mmu-miR-145; mmu-miR-150; mmu-miR-1960; mmu-miR-543; mmu-miR-33; mmu-miR-335-5p; mmu-miR-27a; mmu-miR-377
APH1B	12.665	80	6.31662	mmu-miR-145; mmu-miR-495; mmu-miR-713; mmu-miR-804; mmu-miR-93; mmu-miR-431; mmu-miR-466g; mmu-miR-19a; mmu-miR-20a; mmu-miR-29c; mmu-miR-367; mmu-miR-106a; mmu-miR-17; mmu-miR-129-2-3p; mmu-miR-202-3p; mmu-miR-154; mmu-miR-672; mmu-miR-381; mmu-miR-129-1-3p; mmu-miR-195; mmu-miR-124; mmu-miR-148b; mmu-miR-136; mmu-miR-760-5p; mmu-miR-1198-3p; mmu-miR-148a; mmu-miR-20b; mmu-miR-23b; mmu-miR-377; …
APH1C	8.936	65	7.27395	mmu-miR-495; mmu-miR-335-5p; mmu-miR-713; mmu-miR-431; mmu-miR-466g; mmu-miR-466b-3p; mmu-miR-28; mmu-miR-29c; mmu-miR-367; mmu-let-7a; mmu-miR-129-2-3p; mmu-miR-202-3p; mmu-miR-381; mmu-miR-154; mmu-miR-129-1-3p; mmu-miR-302a; mmu-miR-466a-3p; mmu-miR-302d; mmu-let-7g; mmu-miR-124; mmu-miR-148b; mmu-miR-125a-5p; mmu-miR-148a; mmu-miR-295; mmu-miR-125b-5p; mmu-miR-466c-3p; mmu-miR-1196; mmu-miR-3…
API5	5.583	58	10.3887	mmu-miR-200a; mmu-miR-495; mmu-miR-335-5p; mmu-miR-713; mmu-miR-130a; mmu-miR-19a; mmu-miR-130b; mmu-miR-340-5p; mmu-miR-467f; mmu-miR-466b-3p; mmu-miR-291a-5p; mmu-miR-323-3p; mmu-miR-181a; mmu-miR-669f-3p; mmu-miR-543; mmu-miR-291b-5p; mmu-miR-191; mmu-miR-1198-5p; mmu-miR-468; mmu-miR-129-2-3p; mmu-miR-1952; mmu-miR-672; mmu-miR-129-1-3p; mmu-miR-19b; mmu-miR-423-5p; mmu-miR-466a-3p; mmu-miR-1…
APIP	0.18	5	27.7778	mmu-miR-141; mmu-miR-669a-3p; mmu-miR-200a; mmu-miR-124; mmu-miR-669o-3p
APITD1	2.327	6	2.57843	mmu-miR-291b-3p; mmu-miR-130b; mmu-miR-22; mmu-miR-720; mmu-miR-130a; mmu-miR-301a
APLF	3.494	35	10.0172	mmu-miR-804; mmu-miR-130a; mmu-miR-19a; mmu-miR-130b; mmu-miR-674; mmu-miR-340-5p; mmu-miR-466b-3p; mmu-miR-291a-5p; mmu-miR-323-3p; mmu-miR-28; mmu-miR-669o-5p; mmu-miR-669f-3p; mmu-miR-291b-5p; mmu-miR-468; mmu-miR-1983; mmu-miR-26b; mmu-miR-1952; mmu-miR-154; mmu-miR-421; mmu-miR-19b; mmu-miR-195; mmu-miR-466a-3p; mmu-miR-350; mmu-miR-16; mmu-miR-872; mmu-miR-18b; mmu-miR-291b-3p; mmu-miR-466c…
APLN	2.734	55	20.117	mmu-miR-467e; mmu-miR-335-5p; mmu-miR-93; mmu-miR-96; mmu-miR-19a; mmu-miR-20a; mmu-miR-340-5p; mmu-miR-296-5p; mmu-miR-466b-3p; mmu-miR-367; mmu-miR-27a; mmu-miR-467h; mmu-miR-182; mmu-miR-106a; mmu-miR-103; mmu-miR-17; mmu-miR-129-2-3p; mmu-miR-154; mmu-miR-381; mmu-miR-129-1-3p; mmu-miR-19b; mmu-miR-423-5p; mmu-miR-466a-3p; mmu-miR-195; mmu-miR-32; mmu-miR-433; mmu-miR-124; mmu-miR-148b; mmu-m…
APLP1	0.414	5	12.0773	mmu-miR-466a-3p; mmu-miR-466c-3p; mmu-miR-18b; mmu-miR-466b-3p; mmu-miR-28
APLP2	2.84	42	14.7887	mmu-miR-495; mmu-miR-93; mmu-miR-200b; mmu-miR-20a; mmu-miR-467f; mmu-miR-466b-3p; mmu-miR-30d; mmu-miR-30a; mmu-miR-181a; mmu-let-7a; mmu-miR-669o-3p; mmu-miR-30b; mmu-miR-106a; mmu-miR-103; mmu-miR-129-2-3p; mmu-miR-17; mmu-miR-202-3p; mmu-miR-1952; mmu-miR-129-1-3p; mmu-miR-423-5p; mmu-miR-669a-3p; mmu-let-7g; mmu-miR-466a-3p; mmu-miR-148b; mmu-miR-1960; mmu-miR-429; mmu-miR-872; mmu-miR-148a;…
APMAP	2.141	35	16.3475	mmu-miR-145; mmu-miR-130a; mmu-miR-130b; mmu-miR-150; mmu-miR-674; mmu-miR-30d; mmu-miR-296-5p; mmu-miR-291a-5p; mmu-miR-323-3p; mmu-miR-30a; mmu-miR-21; mmu-miR-291b-5p; mmu-miR-132; mmu-miR-30b; mmu-miR-26b; mmu-miR-1952; mmu-miR-421; mmu-miR-381; mmu-miR-195; mmu-miR-124; mmu-miR-350; mmu-miR-136; mmu-miR-872; mmu-miR-125a-5p; mmu-miR-16; mmu-miR-125b-5p; mmu-miR-762; mmu-miR-377; mmu-miR-291b…
APOA1BP	0.254	7	27.5591	mmu-miR-106a; mmu-miR-20b; mmu-miR-17; mmu-miR-20a; mmu-miR-804; mmu-miR-93; mmu-miR-106b
APOBEC1	6.648	65	9.77738	mmu-miR-495; mmu-miR-335-5p; mmu-miR-804; mmu-miR-431; mmu-miR-466g; mmu-miR-466b-3p; mmu-miR-296-5p; mmu-miR-323-3p; mmu-miR-434-3p; mmu-miR-21; mmu-miR-155; mmu-miR-669f-3p; mmu-miR-541; mmu-miR-468; mmu-miR-129-2-3p; mmu-miR-154; mmu-miR-672; mmu-miR-381; mmu-miR-129-1-3p; mmu-miR-302a; mmu-miR-302d; mmu-miR-433; mmu-miR-148b; mmu-miR-125a-5p; mmu-miR-760-5p; mmu-miR-148a; mmu-miR-295; mmu-miR…
APOBEC3	7.053	22	3.11924	mmu-let-7g; mmu-miR-124; mmu-miR-145; mmu-miR-350; mmu-miR-495; mmu-miR-804; mmu-miR-125a-5p; mmu-miR-484; mmu-miR-125b-5p; mmu-miR-720; mmu-let-7c; mmu-miR-330; mmu-miR-760-3p; mmu-let-7a; mmu-miR-378; mmu-let-7e; mmu-miR-26b; mmu-miR-202-3p; mmu-miR-1952; mmu-miR-26a; mmu-miR-292-5p; mmu-miR-423-5p
APOC1	0.306	2	6.53595	mmu-miR-205; mmu-miR-323-3p
APOE	3.98	14	3.51759	mmu-miR-152; mmu-miR-34c; mmu-miR-124; mmu-miR-148b; mmu-miR-1960; mmu-miR-293; mmu-miR-34a; mmu-miR-136; mmu-miR-148a; mmu-miR-183; mmu-miR-423-3p; mmu-miR-129-2-3p; mmu-miR-1952; mmu-miR-129-1-3p
APOO	1.272	8	6.28931	mmu-miR-429; mmu-miR-200b; mmu-miR-183; mmu-miR-200c; mmu-miR-23b; mmu-miR-1935; mmu-miR-23a; mmu-miR-323-3p
APOOL	1.124	11	9.78648	mmu-miR-466a-3p; mmu-miR-466c-3p; mmu-miR-335-3p; mmu-miR-99b; mmu-miR-484; mmu-miR-26b; mmu-miR-23b; mmu-miR-33; mmu-miR-466b-3p; mmu-miR-26a; mmu-miR-23a
APP	1.038	35	33.7187	mmu-miR-93; mmu-miR-431; mmu-miR-20a; mmu-miR-340-5p; mmu-miR-291a-5p; mmu-miR-323-3p; mmu-miR-669f-3p; mmu-miR-291b-5p; mmu-miR-1893; mmu-miR-191; mmu-miR-106a; mmu-miR-17; mmu-miR-26b; mmu-miR-381; mmu-miR-302a; mmu-miR-195; mmu-miR-302d; mmu-miR-297c; mmu-miR-350; mmu-miR-16; mmu-miR-669d; mmu-miR-20b; mmu-miR-295; mmu-miR-741; mmu-miR-101b; mmu-miR-330; mmu-miR-99b; mmu-miR-15a; mmu-miR-382; …
APPBP2	4.638	65	14.0147	mmu-miR-145; mmu-miR-495; mmu-miR-713; mmu-miR-804; mmu-miR-466g; mmu-miR-340-5p; mmu-miR-466b-3p; mmu-miR-29c; mmu-miR-669f-3p; mmu-let-7a; mmu-miR-541; mmu-miR-468; mmu-miR-202-3p; mmu-miR-381; mmu-let-7g; mmu-miR-195; mmu-miR-433; mmu-miR-669l; mmu-miR-136; mmu-miR-760-5p; mmu-miR-669f-5p; mmu-miR-23b; mmu-miR-377; mmu-miR-466c-3p; mmu-miR-34c; mmu-miR-15a; mmu-let-7e; mmu-miR-329; mmu-miR-122…
APPL1	7.635	86	11.2639	mmu-miR-145; mmu-miR-495; mmu-miR-93; mmu-miR-96; mmu-miR-466g; mmu-miR-19a; mmu-miR-20a; mmu-miR-30d; mmu-miR-30a; mmu-miR-323-3p; mmu-miR-434-3p; mmu-miR-21; mmu-miR-29c; mmu-miR-290-3p; mmu-miR-669f-3p; mmu-miR-367; mmu-miR-1893; mmu-miR-106a; mmu-miR-468; mmu-miR-17; mmu-miR-292-3p; mmu-miR-381; mmu-miR-669a-3p; mmu-miR-466a-3p; mmu-miR-195; mmu-miR-433; mmu-miR-148b; mmu-miR-760-5p; mmu-miR-…
APPL2	10.123	80	7.9028	mmu-miR-145; mmu-miR-495; mmu-miR-804; mmu-miR-93; mmu-miR-431; mmu-miR-466g; mmu-miR-19a; mmu-miR-20a; mmu-miR-340-5p; mmu-miR-30d; mmu-miR-466b-3p; mmu-miR-28; mmu-miR-30a; mmu-miR-434-3p; mmu-let-7a; mmu-miR-1893; mmu-miR-191; mmu-miR-106a; mmu-miR-17; mmu-miR-202-3p; mmu-miR-672; mmu-miR-302a; mmu-miR-302d; mmu-let-7g; mmu-miR-195; mmu-miR-148b; mmu-miR-669l; mmu-miR-125a-5p; mmu-miR-760-5p; …
AQP11	2.635	45	17.0778	mmu-miR-495; mmu-miR-804; mmu-miR-200b; mmu-miR-674; mmu-miR-467f; mmu-miR-669o-5p; mmu-miR-181a; mmu-miR-205; mmu-miR-543; mmu-miR-27a; mmu-miR-1983; mmu-miR-103; mmu-miR-129-2-3p; mmu-miR-154; mmu-miR-129-1-3p; mmu-miR-466a-3p; mmu-miR-195; mmu-miR-142-3p; mmu-miR-124; mmu-miR-148b; mmu-miR-297c; mmu-miR-669l; mmu-miR-429; mmu-miR-872; mmu-miR-125a-5p; mmu-miR-16; mmu-miR-148a; mmu-miR-669f-5p;…
AQP3	1.318	21	15.9332	mmu-miR-297c; mmu-miR-350; mmu-miR-136; mmu-miR-125a-5p; mmu-miR-669d; mmu-miR-150; mmu-miR-23b; mmu-miR-125b-5p; mmu-miR-291a-5p; mmu-miR-101b; mmu-miR-181a; mmu-miR-291b-5p; mmu-miR-293; mmu-miR-378; mmu-miR-376b; mmu-miR-182; mmu-miR-329; mmu-miR-297a; mmu-miR-1935; mmu-miR-23a; mmu-miR-410
AQP5	1.39	10	7.19424	mmu-miR-34c; mmu-miR-350; mmu-miR-293; mmu-miR-34a; mmu-miR-96; mmu-miR-183; mmu-miR-193b; mmu-miR-182; mmu-miR-741; mmu-miR-151-5p
AQP6	1.589	16	10.0692	mmu-miR-200a; mmu-miR-124; mmu-miR-297c; mmu-miR-335-5p; mmu-miR-18b; mmu-miR-762; mmu-miR-323-3p; mmu-miR-141; mmu-miR-205; mmu-miR-760-3p; mmu-miR-27a; mmu-miR-1224; mmu-miR-329; mmu-miR-297a; mmu-miR-292-5p; mmu-miR-423-5p
AQR	6.531	65	9.95253	mmu-miR-145; mmu-miR-93; mmu-miR-96; mmu-miR-431; mmu-miR-20a; mmu-miR-340-5p; mmu-miR-28; mmu-miR-434-3p; mmu-miR-155; mmu-miR-669f-3p; mmu-let-7a; mmu-miR-541; mmu-miR-106a; mmu-miR-468; mmu-miR-17; mmu-miR-202-3p; mmu-miR-381; mmu-miR-672; mmu-let-7g; mmu-miR-195; mmu-miR-148b; mmu-miR-669l; mmu-miR-148a; mmu-miR-760-5p; mmu-miR-20b; mmu-miR-669f-5p; mmu-miR-152; mmu-miR-330; mmu-miR-34c; mmu-…
AR	6.491	77	11.8626	mmu-miR-495; mmu-miR-335-5p; mmu-miR-713; mmu-miR-93; mmu-miR-96; mmu-miR-466g; mmu-miR-19a; mmu-miR-20a; mmu-miR-340-5p; mmu-miR-30d; mmu-miR-466b-3p; mmu-miR-30a; mmu-miR-323-3p; mmu-miR-155; mmu-miR-669f-3p; mmu-miR-367; mmu-miR-106a; mmu-miR-468; mmu-miR-17; mmu-miR-202-3p; mmu-miR-154; mmu-miR-466a-3p; mmu-miR-433; mmu-miR-124; mmu-miR-136; mmu-miR-125a-5p; mmu-miR-20b; mmu-miR-125b-5p; mmu-…
ARAF	4.153	51	12.2803	mmu-miR-200a; mmu-miR-495; mmu-miR-713; mmu-miR-431; mmu-miR-466g; mmu-miR-674; mmu-miR-369-3p; mmu-miR-467f; mmu-miR-30d; mmu-miR-466b-3p; mmu-miR-30a; mmu-miR-323-3p; mmu-miR-669f-3p; mmu-miR-543; mmu-let-7a; mmu-miR-34a; mmu-miR-669o-3p; mmu-miR-27a; mmu-miR-30b; mmu-miR-468; mmu-miR-1952; mmu-miR-421; mmu-miR-669a-3p; mmu-miR-466a-3p; mmu-let-7g; mmu-miR-195; mmu-miR-124; mmu-miR-125a-5p; mmu…
ARAP1	6.415	23	3.58535	mmu-miR-29b; mmu-miR-335-5p; mmu-miR-713; mmu-miR-484; mmu-miR-30d; mmu-miR-296-5p; mmu-miR-291a-5p; mmu-miR-30a; mmu-miR-34c; mmu-miR-330; mmu-miR-29a; mmu-miR-29c; mmu-miR-760-3p; mmu-miR-669f-3p; mmu-miR-291b-5p; mmu-miR-293; mmu-miR-34a; mmu-miR-27a; mmu-miR-30b; mmu-miR-183; mmu-miR-1983; mmu-miR-329; mmu-miR-466f
ARAP2	5.47	68	12.4314	mmu-miR-145; mmu-miR-495; mmu-miR-713; mmu-miR-93; mmu-miR-96; mmu-miR-466g; mmu-miR-19a; mmu-miR-20a; mmu-miR-340-5p; mmu-miR-296-5p; mmu-miR-30d; mmu-miR-466b-3p; mmu-miR-30a; mmu-miR-323-3p; mmu-miR-669f-3p; mmu-miR-367; mmu-miR-106a; mmu-miR-468; mmu-miR-129-2-3p; mmu-miR-17; mmu-miR-381; mmu-miR-129-1-3p; mmu-miR-466a-3p; mmu-miR-148b; mmu-miR-136; mmu-miR-125a-5p; mmu-miR-760-5p; mmu-miR-14…
ARC	6.114	44	7.1966	mmu-miR-495; mmu-miR-804; mmu-miR-431; mmu-miR-466g; mmu-miR-19a; mmu-miR-28; mmu-miR-669o-5p; mmu-miR-367; mmu-let-7a; mmu-miR-34a; mmu-miR-1983; mmu-miR-182; mmu-miR-202-3p; mmu-miR-672; mmu-miR-421; mmu-miR-1952; mmu-miR-19b; mmu-miR-423-5p; mmu-let-7g; mmu-miR-32; mmu-miR-669l; mmu-miR-760-5p; mmu-miR-669f-5p; mmu-miR-484; mmu-miR-363-3p; mmu-miR-720; mmu-miR-23b; mmu-miR-762; mmu-let-7c; mmu…
ARCN1	4.382	61	13.9206	mmu-miR-200a; mmu-miR-145; mmu-miR-29b; mmu-miR-467e; mmu-miR-713; mmu-miR-804; mmu-miR-96; mmu-miR-200b; mmu-miR-674; mmu-miR-369-3p; mmu-miR-467f; mmu-miR-30d; mmu-miR-30a; mmu-miR-434-3p; mmu-miR-29c; mmu-miR-543; mmu-let-7a; mmu-miR-1893; mmu-miR-30b; mmu-miR-467h; mmu-miR-182; mmu-miR-1983; mmu-miR-202-3p; mmu-miR-26b; mmu-miR-1952; mmu-miR-421; mmu-let-7g; mmu-miR-195; mmu-miR-433; mmu-miR-…
AREG	0.347	8	23.0548	mmu-miR-141; mmu-miR-182; mmu-miR-200a; mmu-miR-205; mmu-miR-125b-5p; mmu-miR-33; mmu-miR-125a-5p; mmu-miR-377
ARF1	2.564	19	7.4103	mmu-miR-32; mmu-miR-1960; mmu-miR-713; mmu-miR-363-3p; mmu-miR-674; mmu-miR-296-5p; mmu-miR-291a-5p; mmu-miR-377; mmu-miR-323-3p; mmu-miR-205; mmu-miR-291b-5p; mmu-miR-367; mmu-miR-25; mmu-miR-376b; mmu-miR-26b; mmu-miR-329; mmu-miR-381; mmu-miR-26a; mmu-miR-423-5p
ARF2	3.5	37	10.5714	mmu-miR-200a; mmu-miR-29b; mmu-miR-335-5p; mmu-miR-96; mmu-miR-200b; mmu-miR-674; mmu-miR-340-5p; mmu-miR-291a-5p; mmu-miR-323-3p; mmu-miR-29c; mmu-miR-543; mmu-miR-367; mmu-miR-291b-5p; mmu-miR-182; mmu-miR-421; mmu-miR-1952; mmu-miR-195; mmu-miR-32; mmu-miR-124; mmu-miR-350; mmu-miR-429; mmu-miR-16; mmu-miR-669d; mmu-miR-363-3p; mmu-miR-101b; mmu-miR-141; mmu-miR-330; mmu-miR-29a; mmu-miR-22; m…
ARF3	4.613	56	12.1396	mmu-miR-145; mmu-miR-29b; mmu-miR-495; mmu-miR-335-5p; mmu-miR-713; mmu-miR-466g; mmu-miR-467c; mmu-miR-674; mmu-miR-467f; mmu-miR-28; mmu-miR-181a; mmu-miR-29c; mmu-miR-205; mmu-miR-669f-3p; mmu-miR-543; mmu-miR-132; mmu-miR-1893; mmu-miR-34a; mmu-miR-27a; mmu-miR-103; mmu-miR-154; mmu-miR-1952; mmu-miR-421; mmu-miR-672; mmu-miR-423-5p; mmu-miR-195; mmu-miR-433; mmu-miR-142-3p; mmu-miR-148b; mmu…
ARF4	4.423	33	7.461	mmu-miR-130a; mmu-miR-96; mmu-miR-466g; mmu-miR-130b; mmu-miR-674; mmu-miR-340-5p; mmu-miR-30d; mmu-miR-291a-5p; mmu-miR-30a; mmu-miR-434-3p; mmu-miR-155; mmu-miR-205; mmu-miR-367; mmu-miR-291b-5p; mmu-miR-30b; mmu-miR-182; mmu-miR-103; mmu-miR-381; mmu-miR-195; mmu-miR-32; mmu-miR-16; mmu-miR-760-5p; mmu-miR-669d; mmu-miR-363-3p; mmu-miR-484; mmu-miR-15a; mmu-miR-301a; mmu-miR-25; mmu-miR-376b; …
ARF5	1.062	5	4.7081	mmu-miR-484; mmu-miR-145; mmu-miR-29a; mmu-miR-29b; mmu-miR-29c
ARF6	3.656	41	11.2144	mmu-miR-145; mmu-miR-29b; mmu-miR-467e; mmu-miR-200b; mmu-miR-431; mmu-miR-466g; mmu-miR-19a; mmu-miR-467f; mmu-miR-340-5p; mmu-miR-28; mmu-miR-323-3p; mmu-miR-181a; mmu-miR-29c; mmu-miR-543; mmu-miR-27a; mmu-miR-467h; mmu-miR-1983; mmu-miR-26b; mmu-miR-154; mmu-miR-1952; mmu-miR-381; mmu-miR-19b; mmu-miR-350; mmu-miR-429; mmu-miR-136; mmu-miR-872; mmu-miR-760-5p; mmu-miR-1198-3p; mmu-miR-484; mm…
ARFGAP1	7.45	35	4.69799	mmu-miR-29b; mmu-miR-713; mmu-miR-804; mmu-miR-93; mmu-miR-130a; mmu-miR-19a; mmu-miR-130b; mmu-miR-150; mmu-miR-20a; mmu-miR-674; mmu-miR-28; mmu-miR-29c; mmu-miR-367; mmu-miR-34a; mmu-miR-27a; mmu-miR-106a; mmu-miR-17; mmu-miR-26b; mmu-miR-1952; mmu-miR-19b; mmu-miR-32; mmu-miR-125a-5p; mmu-miR-20b; mmu-miR-363-3p; mmu-miR-484; mmu-miR-125b-5p; mmu-miR-762; mmu-miR-377; mmu-miR-291b-3p; mmu-miR…
ARFGAP2	2.334	23	9.85433	mmu-miR-195; mmu-miR-148b; mmu-miR-1960; mmu-miR-125a-5p; mmu-miR-16; mmu-miR-148a; mmu-miR-150; mmu-miR-125b-5p; mmu-miR-296-5p; mmu-miR-377; mmu-miR-330; mmu-miR-152; mmu-miR-22; mmu-miR-15a; mmu-miR-27a; mmu-miR-183; mmu-miR-103; mmu-miR-1224; mmu-miR-329; mmu-miR-672; mmu-miR-15b; mmu-miR-292-5p; mmu-miR-423-5p
ARFGAP3	0.965	29	30.0518	mmu-miR-302d; mmu-miR-145; mmu-miR-350; mmu-miR-467e; mmu-miR-495; mmu-miR-669l; mmu-miR-374; mmu-miR-431; mmu-miR-466g; mmu-miR-467c; mmu-miR-669f-5p; mmu-miR-295; mmu-miR-23b; mmu-miR-376c; mmu-miR-762; mmu-miR-28; mmu-miR-291b-3p; mmu-miR-290-3p; mmu-miR-669a-5p; mmu-miR-467a; mmu-miR-467h; mmu-miR-376b; mmu-miR-291a-3p; mmu-miR-33; mmu-miR-292-3p; mmu-miR-302a; mmu-miR-292-5p; mmu-miR-23a; mm…
ARFGEF1	3.214	56	17.4238	mmu-miR-145; mmu-miR-467e; mmu-miR-495; mmu-miR-335-5p; mmu-miR-713; mmu-miR-130a; mmu-miR-200b; mmu-miR-466g; mmu-miR-19a; mmu-miR-130b; mmu-miR-150; mmu-miR-340-5p; mmu-miR-467f; mmu-miR-30d; mmu-miR-466b-3p; mmu-miR-30a; mmu-miR-323-3p; mmu-miR-21; mmu-miR-205; mmu-miR-367; mmu-miR-543; mmu-miR-669f-3p; mmu-miR-27a; mmu-miR-30b; mmu-miR-467h; mmu-miR-26b; mmu-miR-381; mmu-miR-421; mmu-miR-19b;…
ARFGEF2	3.441	64	18.5992	mmu-miR-335-5p; mmu-miR-713; mmu-miR-466g; mmu-miR-19a; mmu-miR-466b-3p; mmu-miR-28; mmu-miR-29c; mmu-let-7a; mmu-miR-191; mmu-miR-541; mmu-miR-202-3p; mmu-miR-381; mmu-miR-302a; mmu-miR-669a-3p; mmu-miR-466a-3p; mmu-miR-302d; mmu-let-7g; mmu-miR-433; mmu-miR-124; mmu-miR-125a-5p; mmu-miR-295; mmu-miR-125b-5p; mmu-miR-23b; mmu-miR-377; mmu-miR-466c-3p; mmu-miR-34c; mmu-miR-330; mmu-miR-335-3p; mm…
ARFIP1	5.397	49	9.07912	mmu-miR-467e; mmu-miR-495; mmu-miR-335-5p; mmu-miR-93; mmu-miR-130a; mmu-miR-466g; mmu-miR-19a; mmu-miR-130b; mmu-miR-150; mmu-miR-20a; mmu-miR-369-3p; mmu-miR-340-5p; mmu-miR-30d; mmu-miR-466b-3p; mmu-miR-291a-5p; mmu-miR-30a; mmu-miR-669o-5p; mmu-miR-291b-5p; mmu-miR-30b; mmu-miR-191; mmu-miR-467h; mmu-miR-103; mmu-miR-106a; mmu-miR-468; mmu-miR-17; mmu-miR-421; mmu-miR-19b; mmu-miR-350; mmu-mi…
ARFIP2	17.403	61	3.50514	mmu-miR-145; mmu-miR-335-5p; mmu-miR-713; mmu-miR-93; mmu-miR-130a; mmu-miR-130b; mmu-miR-674; mmu-miR-20a; mmu-miR-467f; mmu-miR-30d; mmu-miR-466b-3p; mmu-miR-28; mmu-miR-30a; mmu-miR-323-3p; mmu-miR-21; mmu-miR-1893; mmu-miR-27a; mmu-miR-1198-5p; mmu-miR-191; mmu-miR-30b; mmu-miR-103; mmu-miR-106a; mmu-miR-1983; mmu-miR-17; mmu-miR-1952; mmu-miR-381; mmu-miR-421; mmu-miR-672; mmu-miR-302a; mmu-…
ARFRP1	18.811	33	1.75429	mmu-miR-145; mmu-miR-674; mmu-miR-340-5p; mmu-miR-466b-3p; mmu-miR-434-3p; mmu-miR-669o-5p; mmu-miR-543; mmu-let-7a; mmu-miR-132; mmu-miR-27a; mmu-miR-26b; mmu-miR-202-3p; mmu-miR-672; mmu-miR-1952; mmu-let-7g; mmu-miR-1960; mmu-miR-136; mmu-miR-125a-5p; mmu-miR-1198-3p; mmu-miR-125b-5p; mmu-miR-18b; mmu-miR-376c; mmu-let-7c; mmu-miR-377; mmu-miR-466c-3p; mmu-miR-22; mmu-miR-382; mmu-miR-183; mmu…
ARGLU1	0.84	12	14.2857	mmu-miR-335-3p; mmu-miR-713; mmu-miR-378; mmu-miR-30b; mmu-miR-541; mmu-miR-19a; mmu-miR-340-5p; mmu-miR-421; mmu-miR-154; mmu-miR-30d; mmu-miR-30a; mmu-miR-19b
ARHGAP1	6.46	35	5.41796	mmu-miR-93; mmu-miR-130a; mmu-miR-19a; mmu-miR-130b; mmu-miR-20a; mmu-miR-296-5p; mmu-miR-290-3p; mmu-miR-155; mmu-miR-34a; mmu-miR-467a; mmu-miR-27a; mmu-miR-106a; mmu-miR-103; mmu-miR-17; mmu-miR-202-3p; mmu-miR-292-3p; mmu-miR-423-5p; mmu-miR-19b; mmu-miR-195; mmu-miR-124; mmu-miR-16; mmu-miR-20b; mmu-miR-18b; mmu-miR-762; mmu-miR-741; mmu-miR-291b-3p; mmu-miR-330; mmu-miR-34c; mmu-miR-335-3p;…
ARHGAP10	0.642	5	7.78816	mmu-miR-124; mmu-miR-22; mmu-miR-28; mmu-miR-423-5p; mmu-miR-466g
ARHGAP11A	17.808	35	1.96541	mmu-miR-200a; mmu-miR-145; mmu-miR-495; mmu-miR-431; mmu-miR-19a; mmu-miR-674; mmu-miR-340-5p; mmu-miR-28; mmu-miR-323-3p; mmu-miR-205; mmu-miR-543; mmu-miR-27a; mmu-miR-1198-5p; mmu-miR-468; mmu-miR-1983; mmu-miR-26b; mmu-miR-421; mmu-miR-19b; mmu-miR-423-5p; mmu-miR-433; mmu-miR-297c; mmu-miR-484; mmu-miR-23b; mmu-miR-141; mmu-miR-330; mmu-miR-335-3p; mmu-miR-134; mmu-miR-376b; mmu-miR-329; mmu…
ARHGAP12	4.566	56	12.2646	mmu-miR-200a; mmu-miR-145; mmu-miR-467e; mmu-miR-495; mmu-miR-335-5p; mmu-miR-93; mmu-miR-130a; mmu-miR-19a; mmu-miR-130b; mmu-miR-20a; mmu-miR-369-3p; mmu-miR-340-5p; mmu-miR-466b-3p; mmu-miR-28; mmu-miR-323-3p; mmu-miR-669f-3p; mmu-let-7a; mmu-miR-669o-3p; mmu-miR-27a; mmu-miR-467h; mmu-miR-541; mmu-miR-106a; mmu-miR-468; mmu-miR-17; mmu-miR-202-3p; mmu-miR-1952; mmu-miR-381; mmu-miR-421; mmu-m…
ARHGAP17	2.998	18	6.004	mmu-miR-124; mmu-miR-350; mmu-miR-429; mmu-miR-136; mmu-miR-96; mmu-miR-200b; mmu-miR-377; mmu-miR-335-3p; mmu-miR-543; mmu-miR-376a; mmu-miR-183; mmu-miR-193b; mmu-miR-182; mmu-miR-103; mmu-miR-26b; mmu-miR-200c; mmu-miR-1224; mmu-miR-26a
ARHGAP19	14.436	61	4.22555	mmu-miR-200a; mmu-miR-145; mmu-miR-495; mmu-miR-713; mmu-miR-804; mmu-miR-130a; mmu-miR-200b; mmu-miR-130b; mmu-miR-150; mmu-miR-369-3p; mmu-miR-674; mmu-miR-466b-3p; mmu-miR-291a-5p; mmu-miR-434-3p; mmu-miR-181a; mmu-miR-205; mmu-miR-291b-5p; mmu-miR-669f-3p; mmu-miR-34a; mmu-miR-669o-3p; mmu-miR-27a; mmu-miR-1198-5p; mmu-miR-103; mmu-miR-182; mmu-miR-202-3p; mmu-miR-154; mmu-miR-1952; mmu-miR-4…
ARHGAP20	10.926	92	8.42028	mmu-miR-335-5p; mmu-miR-93; mmu-miR-96; mmu-miR-431; mmu-miR-466g; mmu-miR-20a; mmu-miR-340-5p; mmu-miR-30d; mmu-miR-466b-3p; mmu-miR-28; mmu-miR-30a; mmu-miR-669f-3p; mmu-miR-367; mmu-let-7a; mmu-miR-541; mmu-miR-468; mmu-miR-106a; mmu-miR-17; mmu-miR-154; mmu-miR-381; mmu-miR-669a-3p; mmu-miR-466a-3p; mmu-let-7g; mmu-miR-195; mmu-miR-433; mmu-miR-148b; mmu-miR-136; mmu-miR-125a-5p; mmu-miR-760-…
ARHGAP21	24.739	75	3.03165	mmu-miR-145; mmu-miR-495; mmu-miR-335-5p; mmu-miR-713; mmu-miR-804; mmu-miR-96; mmu-miR-466g; mmu-miR-19a; mmu-miR-466b-3p; mmu-miR-29c; mmu-miR-290-3p; mmu-miR-669f-3p; mmu-miR-468; mmu-miR-129-2-3p; mmu-miR-381; mmu-miR-292-3p; mmu-miR-129-1-3p; mmu-miR-195; mmu-miR-433; mmu-miR-148b; mmu-miR-136; mmu-miR-760-5p; mmu-miR-148a; mmu-miR-720; mmu-miR-23b; mmu-miR-377; mmu-miR-466c-3p; mmu-miR-330;…
ARHGAP23	9.715	31	3.19094	mmu-miR-466a-3p; mmu-miR-200a; mmu-miR-148b; mmu-miR-1960; mmu-miR-495; mmu-miR-713; mmu-miR-374; mmu-miR-148a; mmu-miR-760-5p; mmu-miR-150; mmu-miR-369-3p; mmu-miR-18b; mmu-miR-340-5p; mmu-miR-296-5p; mmu-miR-28; mmu-miR-377; mmu-miR-141; mmu-miR-181a; mmu-miR-152; mmu-miR-34c; mmu-miR-134; mmu-miR-760-3p; mmu-miR-22; mmu-miR-34a; mmu-miR-423-3p; mmu-miR-103; mmu-miR-1224; mmu-miR-329; mmu-miR-1…
ARHGAP24	5.118	23	4.49394	mmu-miR-302d; mmu-miR-200a; mmu-miR-145; mmu-miR-467e; mmu-miR-136; mmu-miR-96; mmu-miR-467c; mmu-miR-295; mmu-miR-340-5p; mmu-miR-720; mmu-miR-467f; mmu-miR-141; mmu-miR-291b-3p; mmu-miR-21; mmu-miR-290-3p; mmu-miR-467a; mmu-miR-467h; mmu-miR-291a-3p; mmu-miR-329; mmu-miR-292-3p; mmu-miR-302a; mmu-miR-410; mmu-miR-294
ARHGAP27	8.758	42	4.79562	mmu-miR-200a; mmu-miR-145; mmu-miR-713; mmu-miR-467c; mmu-miR-150; mmu-miR-674; mmu-miR-296-5p; mmu-miR-28; mmu-miR-181a; mmu-miR-132; mmu-miR-27a; mmu-miR-129-2-3p; mmu-miR-672; mmu-miR-1952; mmu-miR-129-1-3p; mmu-miR-302a; mmu-miR-302d; mmu-miR-433; mmu-miR-148b; mmu-miR-1960; mmu-miR-148a; mmu-miR-484; mmu-miR-295; mmu-miR-23b; mmu-miR-762; mmu-miR-377; mmu-miR-151-5p; mmu-miR-141; mmu-miR-330…
ARHGAP28	6.522	66	10.1196	mmu-miR-145; mmu-miR-495; mmu-miR-335-5p; mmu-miR-93; mmu-miR-431; mmu-miR-20a; mmu-miR-466b-3p; mmu-miR-434-3p; mmu-miR-29c; mmu-miR-155; mmu-let-7a; mmu-miR-191; mmu-miR-106a; mmu-miR-17; mmu-miR-202-3p; mmu-miR-669a-3p; mmu-let-7g; mmu-miR-195; mmu-miR-124; mmu-miR-760-5p; mmu-miR-20b; mmu-miR-466c-3p; mmu-miR-34c; mmu-miR-330; mmu-miR-134; mmu-miR-378; mmu-miR-15a; mmu-let-7e; mmu-miR-200c; m…
ARHGAP29	10.452	86	8.22809	mmu-miR-145; mmu-miR-495; mmu-miR-713; mmu-miR-804; mmu-miR-96; mmu-miR-466g; mmu-miR-467c; mmu-miR-340-5p; mmu-miR-30d; mmu-miR-30a; mmu-miR-323-3p; mmu-miR-21; mmu-miR-290-3p; mmu-miR-155; mmu-let-7a; mmu-miR-669f-3p; mmu-miR-367; mmu-miR-202-3p; mmu-miR-292-3p; mmu-miR-381; mmu-miR-672; mmu-miR-302a; mmu-miR-669a-3p; mmu-miR-466a-3p; mmu-miR-302d; mmu-let-7g; mmu-miR-195; mmu-miR-136; mmu-miR-…
ARHGAP31	7.563	78	10.3134	mmu-miR-145; mmu-miR-495; mmu-miR-335-5p; mmu-miR-713; mmu-miR-804; mmu-miR-96; mmu-miR-431; mmu-miR-466g; mmu-miR-296-5p; mmu-miR-28; mmu-miR-434-3p; mmu-miR-21; mmu-miR-29c; mmu-miR-155; mmu-miR-367; mmu-miR-1893; mmu-miR-541; mmu-miR-129-2-3p; mmu-miR-672; mmu-miR-129-1-3p; mmu-miR-302a; mmu-miR-302d; mmu-miR-195; mmu-miR-433; mmu-miR-136; mmu-miR-295; mmu-miR-23b; mmu-miR-34c; mmu-miR-330; mm…
ARHGAP33	1.647	19	11.5361	mmu-miR-713; mmu-miR-136; mmu-miR-125a-5p; mmu-miR-19a; mmu-miR-484; mmu-miR-125b-5p; mmu-miR-18b; mmu-miR-296-5p; mmu-miR-376c; mmu-miR-762; mmu-miR-330; mmu-miR-760-3p; mmu-miR-134; mmu-miR-193b; mmu-miR-532-5p; mmu-miR-541; mmu-miR-376b; mmu-miR-423-5p; mmu-miR-19b
ARHGAP39	6.972	59	8.46242	mmu-miR-145; mmu-miR-29b; mmu-miR-335-5p; mmu-miR-804; mmu-miR-96; mmu-miR-674; mmu-miR-467f; mmu-miR-296-5p; mmu-miR-466b-3p; mmu-miR-28; mmu-miR-29c; mmu-miR-669f-3p; mmu-let-7a; mmu-miR-669o-3p; mmu-miR-34a; mmu-miR-1893; mmu-miR-129-2-3p; mmu-miR-202-3p; mmu-miR-1952; mmu-miR-129-1-3p; mmu-miR-302a; mmu-miR-423-5p; mmu-miR-669a-3p; mmu-miR-466a-3p; mmu-miR-302d; mmu-let-7g; mmu-miR-195; mmu-m…
ARHGAP42	3.315	52	15.6863	mmu-miR-200a; mmu-miR-145; mmu-miR-130a; mmu-miR-200b; mmu-miR-431; mmu-miR-466g; mmu-miR-130b; mmu-miR-150; mmu-miR-369-3p; mmu-miR-340-5p; mmu-miR-467f; mmu-miR-466b-3p; mmu-miR-28; mmu-miR-323-3p; mmu-miR-205; mmu-miR-155; mmu-miR-669f-3p; mmu-miR-27a; mmu-miR-1198-5p; mmu-miR-1983; mmu-miR-26b; mmu-miR-1952; mmu-miR-381; mmu-miR-421; mmu-miR-433; mmu-miR-142-3p; mmu-miR-297c; mmu-miR-350; mmu…
ARHGAP8	1.281	1	0.78064	mmu-miR-136
ARHGAP9	0.445	8	17.9775	mmu-miR-1983; mmu-miR-495; mmu-miR-200c; mmu-miR-22; mmu-miR-429; mmu-miR-382; mmu-miR-200b; mmu-miR-28
ARHGDIA	2.654	21	7.91258	mmu-miR-195; mmu-miR-124; mmu-miR-429; mmu-miR-96; mmu-miR-16; mmu-miR-200b; mmu-miR-760-5p; mmu-miR-484; mmu-miR-150; mmu-miR-762; mmu-miR-205; mmu-miR-134; mmu-miR-15a; mmu-miR-532-5p; mmu-miR-182; mmu-miR-129-2-3p; mmu-miR-200c; mmu-miR-1935; mmu-miR-129-1-3p; mmu-miR-15b; mmu-miR-423-5p
ARHGDIG	2.478	15	6.05327	mmu-miR-152; mmu-miR-330; mmu-miR-145; mmu-miR-148b; mmu-miR-1960; mmu-miR-205; mmu-miR-335-3p; mmu-miR-350; mmu-miR-543; mmu-miR-760-3p; mmu-miR-148a; mmu-miR-466g; mmu-miR-1983; mmu-miR-1952; mmu-miR-1935
ARHGEF10	5.301	42	7.92303	mmu-miR-200a; mmu-miR-145; mmu-miR-29b; mmu-miR-93; mmu-miR-19a; mmu-miR-150; mmu-miR-674; mmu-miR-20a; mmu-miR-291a-5p; mmu-miR-29c; mmu-miR-291b-5p; mmu-miR-132; mmu-miR-1198-5p; mmu-miR-468; mmu-miR-106a; mmu-miR-182; mmu-miR-17; mmu-miR-26b; mmu-miR-302a; mmu-miR-19b; mmu-miR-195; mmu-miR-302d; mmu-miR-16; mmu-miR-760-5p; mmu-miR-484; mmu-miR-20b; mmu-miR-295; mmu-miR-762; mmu-miR-377; mmu-mi…
ARHGEF11	4.687	55	11.7346	mmu-miR-335-5p; mmu-miR-93; mmu-miR-431; mmu-miR-674; mmu-miR-20a; mmu-miR-467f; mmu-miR-323-3p; mmu-miR-28; mmu-miR-155; mmu-miR-669f-3p; mmu-miR-543; mmu-miR-132; mmu-miR-27a; mmu-miR-541; mmu-miR-103; mmu-miR-1983; mmu-miR-106a; mmu-miR-17; mmu-miR-1952; mmu-miR-466a-3p; mmu-miR-195; mmu-miR-350; mmu-miR-297c; mmu-miR-148b; mmu-miR-1960; mmu-miR-136; mmu-miR-125a-5p; mmu-miR-16; mmu-miR-760-5p…
ARHGEF12	16.056	101	6.29048	mmu-miR-495; mmu-miR-335-5p; mmu-miR-713; mmu-miR-93; mmu-miR-96; mmu-miR-466g; mmu-miR-467c; mmu-miR-19a; mmu-miR-20a; mmu-miR-296-5p; mmu-miR-30d; mmu-miR-30a; mmu-miR-323-3p; mmu-miR-21; mmu-miR-29c; mmu-miR-290-3p; mmu-let-7a; mmu-miR-191; mmu-miR-106a; mmu-miR-468; mmu-miR-129-2-3p; mmu-miR-17; mmu-miR-202-3p; mmu-miR-292-3p; mmu-miR-381; mmu-miR-672; mmu-miR-129-1-3p; mmu-miR-466a-3p; mmu-m…
ARHGEF15	7.248	65	8.96799	mmu-miR-93; mmu-miR-20a; mmu-miR-340-5p; mmu-miR-296-5p; mmu-miR-28; mmu-miR-290-3p; mmu-miR-669f-3p; mmu-miR-367; mmu-let-7a; mmu-miR-106a; mmu-miR-129-2-3p; mmu-miR-17; mmu-miR-292-3p; mmu-miR-129-1-3p; mmu-miR-466a-3p; mmu-let-7g; mmu-miR-195; mmu-miR-433; mmu-miR-148b; mmu-miR-136; mmu-miR-148a; mmu-miR-760-5p; mmu-miR-20b; mmu-miR-23b; mmu-miR-377; mmu-miR-152; mmu-miR-330; mmu-miR-134; mmu-…
ARHGEF17	3.851	72	18.6964	mmu-miR-495; mmu-miR-804; mmu-miR-431; mmu-miR-466g; mmu-miR-467c; mmu-miR-19a; mmu-miR-434-3p; mmu-miR-290-3p; mmu-miR-367; mmu-miR-541; mmu-miR-468; mmu-miR-129-2-3p; mmu-miR-292-3p; mmu-miR-154; mmu-miR-129-1-3p; mmu-miR-302a; mmu-miR-669a-3p; mmu-miR-302d; mmu-miR-124; mmu-miR-148b; mmu-miR-125a-5p; mmu-miR-760-5p; mmu-miR-148a; mmu-miR-295; mmu-miR-720; mmu-miR-125b-5p; mmu-miR-23b; mmu-miR-…
ARHGEF18	2.23	49	21.9731	mmu-miR-200a; mmu-miR-495; mmu-miR-93; mmu-miR-19a; mmu-miR-150; mmu-miR-369-3p; mmu-miR-20a; mmu-miR-467f; mmu-miR-434-3p; mmu-miR-290-3p; mmu-miR-669f-3p; mmu-miR-34a; mmu-miR-467a; mmu-miR-27a; mmu-miR-1198-5p; mmu-miR-541; mmu-miR-106a; mmu-miR-17; mmu-miR-292-3p; mmu-miR-302a; mmu-miR-19b; mmu-miR-466a-3p; mmu-miR-302d; mmu-miR-142-3p; mmu-miR-350; mmu-miR-297c; mmu-miR-136; mmu-miR-374; mmu…
ARHGEF19	0.843	17	20.1661	mmu-miR-297c; mmu-miR-760-5p; mmu-miR-19a; mmu-miR-150; mmu-miR-296-5p; mmu-miR-669o-5p; mmu-miR-290-3p; mmu-miR-134; mmu-miR-293; mmu-miR-27a; mmu-miR-467a; mmu-miR-182; mmu-miR-1952; mmu-miR-292-3p; mmu-miR-672; mmu-miR-297a; mmu-miR-19b
ARHGEF2	10.104	16	1.58353	mmu-let-7g; mmu-miR-713; mmu-miR-760-5p; mmu-miR-674; mmu-let-7c; mmu-miR-323-3p; mmu-miR-28; mmu-miR-290-3p; mmu-miR-543; mmu-let-7a; mmu-miR-376a; mmu-miR-467a; mmu-let-7e; mmu-miR-202-3p; mmu-miR-33; mmu-miR-292-3p
ARHGEF26	2.018	44	21.8038	mmu-miR-200a; mmu-miR-145; mmu-miR-467e; mmu-miR-93; mmu-miR-96; mmu-miR-369-3p; mmu-miR-20a; mmu-miR-340-5p; mmu-miR-466b-3p; mmu-miR-28; mmu-miR-21; mmu-miR-205; mmu-miR-155; mmu-miR-543; mmu-miR-27a; mmu-miR-1198-5p; mmu-miR-467h; mmu-miR-541; mmu-miR-106a; mmu-miR-182; mmu-miR-17; mmu-miR-26b; mmu-miR-1952; mmu-miR-433; mmu-miR-148b; mmu-miR-1960; mmu-miR-297c; mmu-miR-350; mmu-miR-136; mmu-m…
ARHGEF37	1.256	34	27.0701	mmu-miR-93; mmu-miR-431; mmu-miR-20a; mmu-miR-669o-5p; mmu-miR-181a; mmu-miR-205; mmu-miR-543; mmu-let-7a; mmu-miR-132; mmu-miR-27a; mmu-miR-106a; mmu-miR-1983; mmu-miR-17; mmu-miR-1952; mmu-let-7g; mmu-miR-195; mmu-miR-124; mmu-miR-669l; mmu-miR-136; mmu-miR-16; mmu-miR-20b; mmu-miR-484; mmu-miR-669f-5p; mmu-let-7c; mmu-miR-741; mmu-miR-377; mmu-miR-291b-3p; mmu-miR-330; mmu-miR-669a-5p; mmu-miR…
ARHGEF39	7.667	29	3.78244	mmu-let-7g; mmu-miR-142-3p; mmu-miR-29b; mmu-miR-495; mmu-miR-713; mmu-miR-136; mmu-miR-484; mmu-miR-674; mmu-miR-18b; mmu-let-7c; mmu-miR-741; mmu-miR-181a; mmu-miR-29c; mmu-miR-127; mmu-miR-29a; mmu-let-7a; mmu-miR-760-3p; mmu-miR-669f-3p; mmu-miR-22; mmu-miR-126-3p; mmu-miR-378; mmu-miR-423-3p; mmu-let-7e; mmu-miR-376b; mmu-miR-129-2-3p; mmu-miR-329; mmu-miR-381; mmu-miR-1935; mmu-miR-129-1-3p
ARHGEF5	0.707	18	25.4597	mmu-miR-330; mmu-miR-433; mmu-miR-290-3p; mmu-miR-29a; mmu-miR-29b; mmu-miR-29c; mmu-miR-713; mmu-miR-136; mmu-miR-467a; mmu-miR-1983; mmu-miR-103; mmu-miR-1224; mmu-miR-292-3p; mmu-miR-23b; mmu-miR-672; mmu-miR-762; mmu-miR-23a; mmu-miR-741
ARHGEF7	6.75	41	6.07407	mmu-miR-93; mmu-miR-200b; mmu-miR-466g; mmu-miR-467c; mmu-miR-674; mmu-miR-20a; mmu-miR-296-5p; mmu-miR-291a-5p; mmu-miR-290-3p; mmu-miR-291b-5p; mmu-miR-132; mmu-miR-467a; mmu-miR-191; mmu-miR-541; mmu-miR-1983; mmu-miR-106a; mmu-miR-103; mmu-miR-17; mmu-miR-292-3p; mmu-miR-302a; mmu-miR-423-5p; mmu-miR-302d; mmu-miR-124; mmu-miR-350; mmu-miR-429; mmu-miR-20b; mmu-miR-295; mmu-miR-720; mmu-miR-2…
ARID1A	13.092	67	5.11763	mmu-miR-145; mmu-miR-713; mmu-miR-804; mmu-miR-431; mmu-miR-466g; mmu-miR-19a; mmu-miR-340-5p; mmu-miR-30d; mmu-miR-28; mmu-miR-30a; mmu-miR-434-3p; mmu-miR-21; mmu-miR-290-3p; mmu-miR-669f-3p; mmu-miR-468; mmu-miR-292-3p; mmu-miR-381; mmu-miR-672; mmu-miR-195; mmu-miR-669l; mmu-miR-125a-5p; mmu-miR-1198-3p; mmu-miR-669f-5p; mmu-miR-720; mmu-miR-125b-5p; mmu-miR-377; mmu-miR-330; mmu-miR-335-3p; …
ARID1B	18.882	93	4.92533	mmu-miR-145; mmu-miR-495; mmu-miR-335-5p; mmu-miR-96; mmu-miR-19a; mmu-miR-340-5p; mmu-miR-466b-3p; mmu-miR-296-5p; mmu-miR-28; mmu-miR-323-3p; mmu-miR-21; mmu-miR-29c; mmu-miR-669f-3p; mmu-miR-367; mmu-let-7a; mmu-miR-154; mmu-miR-669a-3p; mmu-miR-466a-3p; mmu-let-7g; mmu-miR-195; mmu-miR-433; mmu-miR-669l; mmu-miR-136; mmu-miR-125a-5p; mmu-miR-669f-5p; mmu-miR-23b; mmu-miR-125b-5p; mmu-miR-377;…
ARID2	3.04	56	18.4211	mmu-miR-467e; mmu-miR-335-5p; mmu-miR-713; mmu-miR-96; mmu-miR-200b; mmu-miR-466g; mmu-miR-467c; mmu-miR-369-3p; mmu-miR-340-5p; mmu-miR-467f; mmu-miR-30d; mmu-miR-466b-3p; mmu-miR-30a; mmu-miR-434-3p; mmu-miR-290-3p; mmu-miR-155; mmu-miR-132; mmu-miR-543; mmu-miR-27a; mmu-miR-467a; mmu-miR-30b; mmu-miR-467h; mmu-miR-541; mmu-miR-182; mmu-miR-26b; mmu-miR-292-3p; mmu-miR-302a; mmu-miR-466a-3p; mm…
ARID3A	9.837	47	4.77788	mmu-miR-495; mmu-miR-96; mmu-miR-19a; mmu-miR-674; mmu-miR-30d; mmu-miR-30a; mmu-miR-181a; mmu-miR-669f-3p; mmu-miR-543; mmu-let-7a; mmu-miR-27a; mmu-miR-30b; mmu-miR-1983; mmu-miR-182; mmu-miR-129-2-3p; mmu-miR-202-3p; mmu-miR-26b; mmu-miR-1952; mmu-miR-381; mmu-miR-672; mmu-miR-129-1-3p; mmu-miR-19b; mmu-let-7g; mmu-miR-433; mmu-miR-124; mmu-miR-1960; mmu-miR-136; mmu-miR-125a-5p; mmu-miR-760-5…
ARID3B	19.03	62	3.25801	mmu-miR-200a; mmu-miR-29b; mmu-miR-335-5p; mmu-miR-713; mmu-miR-96; mmu-miR-431; mmu-miR-466g; mmu-miR-150; mmu-miR-467f; mmu-miR-466b-3p; mmu-miR-28; mmu-miR-181a; mmu-miR-29c; mmu-miR-543; mmu-let-7a; mmu-miR-34a; mmu-miR-103; mmu-miR-182; mmu-miR-1983; mmu-miR-468; mmu-miR-202-3p; mmu-miR-1952; mmu-miR-381; mmu-miR-672; mmu-miR-423-5p; mmu-miR-466a-3p; mmu-let-7g; mmu-miR-195; mmu-miR-124; mmu…
ARID3C	1.503	12	7.98403	mmu-let-7g; mmu-miR-181a; mmu-miR-205; mmu-let-7a; mmu-miR-22; mmu-miR-1198-3p; mmu-let-7e; mmu-miR-1983; mmu-miR-202-3p; mmu-miR-23b; mmu-let-7c; mmu-miR-23a
ARID4A	1.738	48	27.618	mmu-miR-145; mmu-miR-495; mmu-miR-93; mmu-miR-96; mmu-miR-467c; mmu-miR-369-3p; mmu-miR-20a; mmu-miR-467f; mmu-miR-30d; mmu-miR-466b-3p; mmu-miR-30a; mmu-miR-21; mmu-miR-155; mmu-miR-290-3p; mmu-miR-34a; mmu-miR-27a; mmu-miR-467a; mmu-miR-30b; mmu-miR-1983; mmu-miR-103; mmu-miR-106a; mmu-miR-182; mmu-miR-17; mmu-miR-292-3p; mmu-miR-381; mmu-miR-302a; mmu-miR-466a-3p; mmu-miR-302d; mmu-miR-350; mm…
ARID4B	5.663	67	11.8312	mmu-miR-495; mmu-miR-713; mmu-miR-93; mmu-miR-467c; mmu-miR-19a; mmu-miR-20a; mmu-miR-466b-3p; mmu-miR-30d; mmu-miR-30a; mmu-miR-323-3p; mmu-miR-434-3p; mmu-miR-290-3p; mmu-miR-669f-3p; mmu-miR-106a; mmu-miR-17; mmu-miR-381; mmu-miR-292-3p; mmu-miR-302a; mmu-miR-669a-3p; mmu-miR-466a-3p; mmu-miR-302d; mmu-miR-195; mmu-miR-669l; mmu-miR-669f-5p; mmu-miR-20b; mmu-miR-295; mmu-miR-377; mmu-miR-466c-…
ARID5A	24.246	49	2.02095	mmu-miR-145; mmu-miR-29b; mmu-miR-335-5p; mmu-miR-804; mmu-miR-130a; mmu-miR-96; mmu-miR-431; mmu-miR-19a; mmu-miR-130b; mmu-miR-674; mmu-miR-296-5p; mmu-miR-28; mmu-miR-29c; mmu-miR-205; mmu-miR-155; mmu-miR-132; mmu-miR-34a; mmu-miR-27a; mmu-miR-182; mmu-miR-103; mmu-miR-1952; mmu-miR-421; mmu-miR-19b; mmu-miR-423-5p; mmu-miR-433; mmu-miR-1960; mmu-miR-136; mmu-miR-760-5p; mmu-miR-669d; mmu-miR…
ARIH1	9.88	96	9.7166	mmu-miR-495; mmu-miR-335-5p; mmu-miR-713; mmu-miR-804; mmu-miR-93; mmu-miR-431; mmu-miR-466g; mmu-miR-20a; mmu-miR-30d; mmu-miR-28; mmu-miR-30a; mmu-miR-323-3p; mmu-miR-434-3p; mmu-miR-21; mmu-let-7a; mmu-miR-669f-3p; mmu-miR-367; mmu-miR-1893; mmu-miR-541; mmu-miR-106a; mmu-miR-129-2-3p; mmu-miR-17; mmu-miR-202-3p; mmu-miR-154; mmu-miR-381; mmu-miR-129-1-3p; mmu-miR-302a; mmu-miR-302d; mmu-let-7…
ARIH2	2.212	39	17.6311	mmu-miR-29b; mmu-miR-713; mmu-miR-200b; mmu-miR-19a; mmu-miR-150; mmu-miR-674; mmu-miR-466b-3p; mmu-miR-296-5p; mmu-miR-291a-5p; mmu-miR-323-3p; mmu-miR-181a; mmu-miR-29c; mmu-miR-291b-5p; mmu-miR-34a; mmu-miR-27a; mmu-miR-541; mmu-miR-103; mmu-miR-1983; mmu-miR-26b; mmu-miR-19b; mmu-miR-148b; mmu-miR-429; mmu-miR-374; mmu-miR-148a; mmu-miR-23b; mmu-miR-487b; mmu-miR-466c-3p; mmu-miR-152; mmu-miR…
ARL1	1.072	21	19.5896	mmu-miR-466a-3p; mmu-miR-669l; mmu-miR-93; mmu-miR-466g; mmu-miR-669f-5p; mmu-miR-20b; mmu-miR-20a; mmu-miR-467f; mmu-miR-466b-3p; mmu-miR-323-3p; mmu-miR-1196; mmu-miR-466c-3p; mmu-miR-181a; mmu-miR-335-3p; mmu-miR-669f-3p; mmu-miR-669a-5p; mmu-miR-106b; mmu-miR-106a; mmu-miR-17; mmu-miR-381; mmu-miR-410
ARL10	2.045	42	20.5379	mmu-miR-200a; mmu-miR-145; mmu-miR-335-5p; mmu-miR-713; mmu-miR-96; mmu-miR-674; mmu-miR-30d; mmu-miR-30a; mmu-miR-28; mmu-miR-290-3p; mmu-let-7a; mmu-miR-132; mmu-miR-467a; mmu-miR-27a; mmu-miR-30b; mmu-miR-182; mmu-miR-202-3p; mmu-miR-154; mmu-miR-1952; mmu-miR-292-3p; mmu-miR-466a-3p; mmu-let-7g; mmu-miR-195; mmu-miR-1960; mmu-miR-297c; mmu-miR-136; mmu-miR-872; mmu-miR-16; mmu-miR-669d; mmu-m…
ARL13B	4.958	39	7.86608	mmu-miR-200a; mmu-miR-145; mmu-miR-495; mmu-miR-335-5p; mmu-miR-431; mmu-miR-340-5p; mmu-miR-30d; mmu-miR-28; mmu-miR-30a; mmu-miR-323-3p; mmu-miR-181a; mmu-miR-155; mmu-miR-669f-3p; mmu-miR-543; mmu-miR-30b; mmu-miR-1983; mmu-miR-468; mmu-miR-103; mmu-miR-26b; mmu-miR-672; mmu-miR-433; mmu-miR-297c; mmu-miR-350; mmu-miR-125a-5p; mmu-miR-374; mmu-miR-760-5p; mmu-miR-669d; mmu-miR-484; mmu-miR-125…
ARL14EP	6.603	68	10.2983	mmu-miR-145; mmu-miR-335-5p; mmu-miR-713; mmu-miR-431; mmu-miR-466b-3p; mmu-miR-30d; mmu-miR-30a; mmu-miR-191; mmu-miR-129-2-3p; mmu-miR-672; mmu-miR-381; mmu-miR-129-1-3p; mmu-miR-302a; mmu-miR-466a-3p; mmu-miR-302d; mmu-miR-195; mmu-miR-148b; mmu-miR-669l; mmu-miR-760-5p; mmu-miR-148a; mmu-miR-669f-5p; mmu-miR-295; mmu-miR-377; mmu-miR-466c-3p; mmu-miR-34c; mmu-miR-330; mmu-miR-152; mmu-miR-127…
ARL15	2.758	44	15.9536	mmu-miR-467e; mmu-miR-804; mmu-miR-200b; mmu-miR-466g; mmu-miR-674; mmu-miR-369-3p; mmu-miR-466b-3p; mmu-miR-30d; mmu-miR-30a; mmu-miR-155; mmu-miR-205; mmu-miR-669f-3p; mmu-miR-543; mmu-miR-34a; mmu-miR-27a; mmu-miR-30b; mmu-miR-467h; mmu-miR-468; mmu-miR-26b; mmu-miR-466a-3p; mmu-miR-142-3p; mmu-miR-124; mmu-miR-350; mmu-miR-429; mmu-miR-136; mmu-miR-374; mmu-miR-1198-3p; mmu-miR-18b; mmu-miR-2…
ARL16	46.328	40	0.863409	mmu-miR-467e; mmu-miR-335-5p; mmu-miR-93; mmu-miR-96; mmu-miR-200b; mmu-miR-431; mmu-miR-466g; mmu-miR-150; mmu-miR-20a; mmu-miR-674; mmu-miR-291a-5p; mmu-miR-28; mmu-miR-434-3p; mmu-miR-205; mmu-miR-291b-5p; mmu-miR-34a; mmu-miR-467h; mmu-miR-106a; mmu-miR-468; mmu-miR-17; mmu-miR-129-2-3p; mmu-miR-26b; mmu-miR-421; mmu-miR-129-1-3p; mmu-miR-1960; mmu-miR-350; mmu-miR-429; mmu-miR-136; mmu-miR-7…
ARL2	1.837	15	8.16549	mmu-miR-195; mmu-miR-1960; mmu-miR-760-3p; mmu-miR-136; mmu-miR-15a; mmu-miR-96; mmu-miR-16; mmu-miR-182; mmu-miR-1224; mmu-miR-1952; mmu-miR-720; mmu-miR-1935; mmu-miR-292-5p; mmu-miR-15b; mmu-miR-28
ARL2BP	2.802	27	9.63597	mmu-miR-297c; mmu-miR-467e; mmu-miR-495; mmu-miR-429; mmu-miR-200b; mmu-miR-374; mmu-miR-872; mmu-miR-369-3p; mmu-miR-23b; mmu-miR-376c; mmu-miR-741; mmu-miR-434-3p; mmu-miR-21; mmu-miR-34c; mmu-miR-155; mmu-miR-335-3p; mmu-miR-34a; mmu-miR-293; mmu-miR-378; mmu-miR-193b; mmu-miR-467h; mmu-miR-376b; mmu-miR-200c; mmu-miR-154; mmu-miR-1952; mmu-miR-297a; mmu-miR-23a
ARL3	0.199	5	25.1256	mmu-miR-195; mmu-miR-484; mmu-miR-15a; mmu-miR-15b; mmu-miR-16
ARL4A	7.086	69	9.73751	mmu-miR-145; mmu-miR-495; mmu-miR-335-5p; mmu-miR-93; mmu-miR-466g; mmu-miR-20a; mmu-miR-340-5p; mmu-miR-323-3p; mmu-miR-434-3p; mmu-miR-21; mmu-miR-29c; mmu-miR-155; mmu-miR-669f-3p; mmu-miR-367; mmu-miR-541; mmu-miR-468; mmu-miR-106a; mmu-miR-17; mmu-miR-381; mmu-miR-669a-3p; mmu-miR-466a-3p; mmu-miR-125a-5p; mmu-miR-20b; mmu-miR-125b-5p; mmu-miR-23b; mmu-miR-1196; mmu-miR-335-3p; mmu-miR-134; …
ARL4C	7.994	57	7.13035	mmu-miR-145; mmu-miR-93; mmu-miR-96; mmu-miR-200b; mmu-miR-431; mmu-miR-466g; mmu-miR-20a; mmu-miR-340-5p; mmu-miR-296-5p; mmu-miR-30d; mmu-miR-291a-5p; mmu-miR-30a; mmu-miR-323-3p; mmu-miR-290-3p; mmu-miR-291b-5p; mmu-miR-132; mmu-miR-1893; mmu-miR-34a; mmu-miR-27a; mmu-miR-467a; mmu-miR-1198-5p; mmu-miR-30b; mmu-miR-541; mmu-miR-182; mmu-miR-103; mmu-miR-106a; mmu-miR-17; mmu-miR-26b; mmu-miR-2…
ARL4D	1.285	27	21.0117	mmu-let-7g; mmu-miR-148b; mmu-miR-1960; mmu-miR-29b; mmu-miR-495; mmu-miR-136; mmu-miR-148a; mmu-miR-431; mmu-miR-467c; mmu-miR-340-5p; mmu-let-7c; mmu-miR-101b; mmu-miR-28; mmu-miR-330; mmu-miR-152; mmu-miR-205; mmu-miR-29a; mmu-miR-29c; mmu-let-7a; mmu-miR-22; mmu-miR-27a; mmu-miR-378; mmu-let-7e; mmu-miR-129-2-3p; mmu-miR-329; mmu-miR-1952; mmu-miR-129-1-3p
ARL5B	25.572	95	3.715	mmu-miR-145; mmu-miR-495; mmu-miR-713; mmu-miR-804; mmu-miR-96; mmu-miR-466g; mmu-miR-467c; mmu-miR-19a; mmu-miR-340-5p; mmu-miR-296-5p; mmu-miR-466b-3p; mmu-miR-28; mmu-miR-434-3p; mmu-miR-21; mmu-miR-155; mmu-miR-29c; mmu-miR-290-3p; mmu-let-7a; mmu-miR-367; mmu-miR-202-3p; mmu-miR-292-3p; mmu-miR-381; mmu-miR-302a; mmu-miR-302d; mmu-let-7g; mmu-miR-195; mmu-miR-433; mmu-miR-124; mmu-miR-136; m…
ARL5C	1.682	21	12.4851	mmu-miR-29b; mmu-miR-467e; mmu-miR-713; mmu-miR-136; mmu-miR-374; mmu-miR-466g; mmu-miR-484; mmu-miR-150; mmu-miR-762; mmu-miR-323-3p; mmu-miR-377; mmu-miR-741; mmu-miR-330; mmu-miR-29a; mmu-miR-29c; mmu-miR-467h; mmu-miR-468; mmu-miR-1224; mmu-miR-329; mmu-miR-1935; mmu-miR-423-5p
ARL6	2.688	16	5.95238	mmu-miR-433; mmu-miR-96; mmu-miR-760-5p; mmu-miR-674; mmu-miR-340-5p; mmu-miR-466b-3p; mmu-miR-466c-3p; mmu-miR-669o-5p; mmu-miR-205; mmu-miR-335-3p; mmu-miR-669f-3p; mmu-miR-27a; mmu-miR-532-5p; mmu-miR-182; mmu-miR-129-2-3p; mmu-miR-129-1-3p
ARL6IP1	1.52	34	22.3684	mmu-miR-200a; mmu-miR-350; mmu-miR-1960; mmu-miR-148b; mmu-miR-467e; mmu-miR-495; mmu-miR-713; mmu-miR-130a; mmu-miR-148a; mmu-miR-760-5p; mmu-miR-19a; mmu-miR-130b; mmu-miR-150; mmu-miR-30d; mmu-miR-291a-5p; mmu-miR-741; mmu-miR-377; mmu-miR-30a; mmu-miR-1196; mmu-miR-141; mmu-miR-291b-3p; mmu-miR-152; mmu-miR-291b-5p; mmu-miR-376a; mmu-miR-382; mmu-miR-27a; mmu-miR-301a; mmu-miR-30b; mmu-miR-46…
ARL6IP4	0.424	4	9.43396	mmu-miR-124; mmu-miR-350; mmu-miR-762; mmu-miR-760-5p
ARL6IP5	0.916	24	26.2009	mmu-miR-495; mmu-miR-93; mmu-miR-130a; mmu-miR-136; mmu-miR-466g; mmu-miR-484; mmu-miR-20b; mmu-miR-130b; mmu-miR-20a; mmu-miR-369-3p; mmu-miR-296-5p; mmu-miR-30d; mmu-miR-30a; mmu-miR-291b-3p; mmu-miR-335-3p; mmu-miR-205; mmu-miR-30b; mmu-miR-301a; mmu-miR-106b; mmu-miR-183; mmu-miR-532-5p; mmu-miR-106a; mmu-miR-17; mmu-miR-672
ARL6IP6	1.926	37	19.2108	mmu-miR-96; mmu-miR-431; mmu-miR-369-3p; mmu-miR-467f; mmu-miR-340-5p; mmu-miR-466b-3p; mmu-miR-30d; mmu-miR-291a-5p; mmu-miR-30a; mmu-miR-434-3p; mmu-miR-290-3p; mmu-miR-669f-3p; mmu-miR-543; mmu-miR-291b-5p; mmu-miR-467a; mmu-miR-30b; mmu-miR-182; mmu-miR-26b; mmu-miR-292-3p; mmu-miR-466a-3p; mmu-miR-297c; mmu-miR-374; mmu-miR-1198-3p; mmu-miR-669d; mmu-miR-23b; mmu-miR-376c; mmu-miR-101b; mmu-…
ARL8A	2.096	11	5.24809	mmu-miR-466a-3p; mmu-miR-34c; mmu-miR-145; mmu-miR-495; mmu-miR-134; mmu-miR-669f-3p; mmu-miR-34a; mmu-miR-103; mmu-miR-329; mmu-miR-1935; mmu-miR-28
ARL8B	2.221	39	17.5597	mmu-miR-467e; mmu-miR-130a; mmu-miR-200b; mmu-miR-19a; mmu-miR-130b; mmu-miR-30d; mmu-miR-323-3p; mmu-miR-30a; mmu-miR-205; mmu-miR-543; mmu-miR-34a; mmu-miR-27a; mmu-miR-30b; mmu-miR-467h; mmu-miR-103; mmu-miR-129-2-3p; mmu-miR-154; mmu-miR-129-1-3p; mmu-miR-19b; mmu-miR-195; mmu-miR-433; mmu-miR-148b; mmu-miR-429; mmu-miR-16; mmu-miR-1198-3p; mmu-miR-148a; mmu-miR-484; mmu-miR-23b; mmu-miR-377;…
ARMC1	2.083	37	17.7628	mmu-miR-200a; mmu-miR-495; mmu-miR-431; mmu-miR-674; mmu-miR-669o-5p; mmu-miR-181a; mmu-miR-205; mmu-miR-367; mmu-miR-132; mmu-miR-27a; mmu-miR-1198-5p; mmu-miR-468; mmu-miR-103; mmu-miR-182; mmu-miR-129-2-3p; mmu-miR-26b; mmu-miR-1952; mmu-miR-421; mmu-miR-129-1-3p; mmu-miR-32; mmu-miR-466a-3p; mmu-miR-433; mmu-miR-124; mmu-miR-297c; mmu-miR-669d; mmu-miR-363-3p; mmu-miR-376c; mmu-miR-101b; mmu-…
ARMC10	2.811	25	8.89363	mmu-miR-195; mmu-miR-669a-3p; mmu-miR-433; mmu-miR-297c; mmu-miR-467e; mmu-miR-136; mmu-miR-16; mmu-miR-467f; mmu-miR-23b; mmu-miR-28; mmu-miR-741; mmu-miR-434-3p; mmu-miR-34c; mmu-miR-205; mmu-miR-669o-3p; mmu-miR-34a; mmu-miR-378; mmu-miR-15a; mmu-miR-467h; mmu-miR-103; mmu-miR-33; mmu-miR-381; mmu-miR-297a; mmu-miR-15b; mmu-miR-23a
ARMC2	1.382	22	15.919	mmu-miR-148b; mmu-miR-1960; mmu-miR-429; mmu-miR-200b; mmu-miR-148a; mmu-miR-674; mmu-miR-340-5p; mmu-miR-296-5p; mmu-miR-762; mmu-miR-30d; mmu-miR-30a; mmu-miR-152; mmu-miR-181a; mmu-miR-335-3p; mmu-miR-293; mmu-miR-30b; mmu-miR-1198-5p; mmu-miR-183; mmu-miR-423-3p; mmu-miR-26b; mmu-miR-200c; mmu-miR-26a
ARMC5	1.076	17	15.7993	mmu-miR-145; mmu-miR-148b; mmu-miR-125a-5p; mmu-miR-148a; mmu-miR-484; mmu-miR-150; mmu-miR-125b-5p; mmu-miR-296-5p; mmu-miR-28; mmu-miR-741; mmu-miR-291b-3p; mmu-miR-152; mmu-miR-22; mmu-miR-376a; mmu-miR-191; mmu-miR-468; mmu-miR-423-5p
ARMC6	4.387	42	9.57374	mmu-miR-200a; mmu-miR-713; mmu-miR-804; mmu-miR-674; mmu-miR-296-5p; mmu-miR-291a-5p; mmu-miR-205; mmu-miR-291b-5p; mmu-miR-34a; mmu-miR-27a; mmu-miR-1198-5p; mmu-miR-1983; mmu-miR-103; mmu-miR-129-2-3p; mmu-miR-129-1-3p; mmu-miR-195; mmu-miR-350; mmu-miR-148b; mmu-miR-1960; mmu-miR-297c; mmu-miR-125a-5p; mmu-miR-16; mmu-miR-760-5p; mmu-miR-1198-3p; mmu-miR-148a; mmu-miR-484; mmu-miR-125b-5p; mmu…
ARMC8	2.387	55	23.0415	mmu-miR-29b; mmu-miR-93; mmu-miR-200b; mmu-miR-19a; mmu-miR-150; mmu-miR-20a; mmu-miR-340-5p; mmu-miR-296-5p; mmu-miR-21; mmu-miR-181a; mmu-miR-29c; mmu-miR-205; mmu-miR-543; mmu-let-7a; mmu-miR-132; mmu-miR-34a; mmu-miR-103; mmu-miR-106a; mmu-miR-468; mmu-miR-17; mmu-miR-202-3p; mmu-miR-421; mmu-miR-672; mmu-miR-302a; mmu-miR-19b; mmu-miR-302d; mmu-let-7g; mmu-miR-195; mmu-miR-350; mmu-miR-669l;…
ARMCX1	11.304	35	3.09625	mmu-miR-495; mmu-miR-93; mmu-miR-96; mmu-miR-19a; mmu-miR-20a; mmu-miR-467f; mmu-miR-28; mmu-miR-21; mmu-miR-181a; mmu-miR-155; mmu-miR-106a; mmu-miR-182; mmu-miR-1983; mmu-miR-129-2-3p; mmu-miR-17; mmu-miR-1952; mmu-miR-672; mmu-miR-129-1-3p; mmu-miR-19b; mmu-miR-195; mmu-miR-1960; mmu-miR-350; mmu-miR-16; mmu-miR-374; mmu-miR-20b; mmu-miR-377; mmu-miR-487b; mmu-miR-330; mmu-miR-15a; mmu-miR-378…
ARMCX2	15.222	54	3.5475	mmu-miR-145; mmu-miR-335-5p; mmu-miR-130a; mmu-miR-96; mmu-miR-200b; mmu-miR-466g; mmu-miR-130b; mmu-miR-150; mmu-miR-340-5p; mmu-miR-467f; mmu-miR-155; mmu-miR-34a; mmu-miR-182; mmu-miR-103; mmu-miR-129-2-3p; mmu-miR-26b; mmu-miR-202-3p; mmu-miR-154; mmu-miR-1952; mmu-miR-672; mmu-miR-129-1-3p; mmu-miR-195; mmu-miR-142-3p; mmu-miR-429; mmu-miR-125a-5p; mmu-miR-16; mmu-miR-720; mmu-miR-125b-5p; m…
ARMCX4	7.541	59	7.8239	mmu-miR-145; mmu-miR-29b; mmu-miR-495; mmu-miR-335-5p; mmu-miR-713; mmu-miR-96; mmu-miR-431; mmu-miR-150; mmu-miR-674; mmu-miR-340-5p; mmu-miR-28; mmu-miR-323-3p; mmu-miR-434-3p; mmu-miR-29c; mmu-miR-205; mmu-miR-155; mmu-miR-132; mmu-miR-27a; mmu-miR-541; mmu-miR-103; mmu-miR-182; mmu-miR-1983; mmu-miR-129-2-3p; mmu-miR-1952; mmu-miR-129-1-3p; mmu-miR-195; mmu-miR-433; mmu-miR-142-3p; mmu-miR-35…
ARMCX6	7.574	40	5.28123	mmu-miR-93; mmu-miR-96; mmu-miR-431; mmu-miR-20a; mmu-miR-296-5p; mmu-miR-291a-5p; mmu-miR-28; mmu-miR-181a; mmu-miR-205; mmu-miR-543; mmu-miR-291b-5p; mmu-miR-27a; mmu-miR-1983; mmu-miR-468; mmu-miR-106a; mmu-miR-103; mmu-miR-182; mmu-miR-17; mmu-miR-129-2-3p; mmu-miR-381; mmu-miR-129-1-3p; mmu-miR-302a; mmu-miR-195; mmu-miR-302d; mmu-miR-1960; mmu-miR-136; mmu-miR-16; mmu-miR-760-5p; mmu-miR-48…
ARNT	7.748	41	5.29169	mmu-miR-29b; mmu-miR-467e; mmu-miR-495; mmu-miR-467c; mmu-miR-19a; mmu-miR-150; mmu-miR-369-3p; mmu-miR-340-5p; mmu-miR-323-3p; mmu-miR-28; mmu-miR-29c; mmu-miR-290-3p; mmu-miR-543; mmu-miR-467a; mmu-miR-27a; mmu-miR-1198-5p; mmu-miR-467h; mmu-miR-1983; mmu-miR-103; mmu-miR-292-3p; mmu-miR-1952; mmu-miR-302a; mmu-miR-19b; mmu-miR-302d; mmu-miR-433; mmu-miR-297c; mmu-miR-350; mmu-miR-136; mmu-miR-…
ARNTL	0.664	12	18.0723	mmu-miR-141; mmu-miR-142-3p; mmu-miR-200a; mmu-miR-433; mmu-miR-155; mmu-miR-669f-3p; mmu-miR-760-3p; mmu-miR-27a; mmu-miR-1198-3p; mmu-miR-381; mmu-miR-421; mmu-miR-323-3p
ARNTL2	3.052	40	13.1062	mmu-miR-29b; mmu-miR-335-5p; mmu-miR-804; mmu-miR-130a; mmu-miR-431; mmu-miR-130b; mmu-miR-674; mmu-miR-30d; mmu-miR-30a; mmu-miR-181a; mmu-miR-29c; mmu-miR-205; mmu-miR-543; mmu-miR-669o-3p; mmu-miR-30b; mmu-miR-1198-5p; mmu-miR-541; mmu-miR-1983; mmu-miR-26b; mmu-miR-669a-3p; mmu-miR-433; mmu-miR-124; mmu-miR-148b; mmu-miR-1960; mmu-miR-297c; mmu-miR-136; mmu-miR-148a; mmu-miR-376c; mmu-miR-377…
ARPC1A	0.385	4	10.3896	mmu-miR-466c-3p; mmu-miR-23b; mmu-miR-466b-3p; mmu-miR-23a
ARPC1B	1.879	25	13.3049	mmu-miR-433; mmu-miR-124; mmu-miR-1960; mmu-miR-335-5p; mmu-miR-804; mmu-miR-96; mmu-miR-466g; mmu-miR-484; mmu-miR-23b; mmu-miR-34c; mmu-miR-181a; mmu-miR-21; mmu-miR-205; mmu-miR-22; mmu-miR-34a; mmu-miR-382; mmu-miR-532-5p; mmu-miR-541; mmu-miR-182; mmu-miR-129-2-3p; mmu-miR-329; mmu-miR-1952; mmu-miR-129-1-3p; mmu-miR-1935; mmu-miR-23a
ARPC2	1.317	10	7.59301	mmu-miR-32; mmu-miR-434-3p; mmu-miR-367; mmu-miR-382; mmu-miR-760-5p; mmu-miR-25; mmu-miR-363-3p; mmu-miR-33; mmu-miR-154; mmu-miR-18b
ARPC3	1.244	7	5.62701	mmu-miR-433; mmu-miR-484; mmu-miR-150; mmu-miR-350; mmu-miR-1952; mmu-miR-335-5p; mmu-miR-292-5p
ARPC4	3.356	30	8.93921	mmu-miR-302d; mmu-miR-142-3p; mmu-miR-145; mmu-miR-148b; mmu-miR-335-5p; mmu-miR-125a-5p; mmu-miR-872; mmu-miR-1198-3p; mmu-miR-148a; mmu-miR-295; mmu-miR-125b-5p; mmu-miR-296-5p; mmu-miR-762; mmu-miR-377; mmu-miR-741; mmu-miR-152; mmu-miR-27a; mmu-miR-378; mmu-miR-191; mmu-miR-1983; mmu-miR-103; mmu-miR-376b; mmu-miR-291a-3p; mmu-miR-129-2-3p; mmu-miR-1224; mmu-miR-329; mmu-miR-672; mmu-miR-129-…
ARPC5	2.676	30	11.2108	mmu-miR-195; mmu-miR-32; mmu-miR-466a-3p; mmu-miR-200a; mmu-miR-124; mmu-miR-145; mmu-miR-16; mmu-miR-466g; mmu-miR-669d; mmu-miR-363-3p; mmu-miR-674; mmu-miR-30d; mmu-miR-291a-5p; mmu-miR-30a; mmu-miR-741; mmu-miR-141; mmu-miR-181a; mmu-miR-335-3p; mmu-miR-291b-5p; mmu-miR-367; mmu-miR-22; mmu-miR-15a; mmu-miR-378; mmu-miR-30b; mmu-miR-193b; mmu-miR-25; mmu-miR-1952; mmu-miR-142-5p; mmu-miR-421;…
ARPC5L	1.64	13	7.92683	mmu-miR-466c-3p; mmu-miR-181a; mmu-miR-1960; mmu-miR-132; mmu-miR-335-5p; mmu-miR-96; mmu-miR-374; mmu-miR-183; mmu-miR-182; mmu-miR-103; mmu-miR-329; mmu-miR-1952; mmu-miR-466b-3p
ARPP19	36.79	74	2.01142	mmu-miR-495; mmu-miR-713; mmu-miR-96; mmu-miR-466g; mmu-miR-19a; mmu-miR-340-5p; mmu-miR-466b-3p; mmu-miR-30d; mmu-miR-30a; mmu-miR-29c; mmu-miR-367; mmu-let-7a; mmu-miR-468; mmu-miR-129-2-3p; mmu-miR-202-3p; mmu-miR-154; mmu-miR-381; mmu-miR-129-1-3p; mmu-miR-302a; mmu-miR-669a-3p; mmu-miR-466a-3p; mmu-miR-302d; mmu-let-7g; mmu-miR-433; mmu-miR-148b; mmu-miR-148a; mmu-miR-295; mmu-miR-23b; mmu-m…
ARRB1	17.022	81	4.75855	mmu-miR-145; mmu-miR-495; mmu-miR-335-5p; mmu-miR-713; mmu-miR-804; mmu-miR-431; mmu-miR-466g; mmu-miR-19a; mmu-miR-30d; mmu-miR-296-5p; mmu-miR-28; mmu-miR-30a; mmu-miR-29c; mmu-miR-155; mmu-miR-191; mmu-miR-541; mmu-miR-468; mmu-miR-129-2-3p; mmu-miR-129-1-3p; mmu-miR-302a; mmu-miR-302d; mmu-miR-195; mmu-miR-433; mmu-miR-124; mmu-miR-148b; mmu-miR-669l; mmu-miR-125a-5p; mmu-miR-760-5p; mmu-miR-…
ARRB2	5.283	22	4.1643	mmu-miR-124; mmu-miR-29b; mmu-miR-96; mmu-miR-669d; mmu-miR-150; mmu-miR-674; mmu-miR-762; mmu-miR-181a; mmu-miR-29c; mmu-miR-155; mmu-miR-205; mmu-miR-29a; mmu-miR-134; mmu-miR-1893; mmu-miR-22; mmu-miR-27a; mmu-miR-182; mmu-miR-26b; mmu-miR-421; mmu-miR-26a; mmu-miR-1935; mmu-miR-292-5p
ARRDC1	7.807	30	3.84271	mmu-miR-195; mmu-miR-124; mmu-miR-148b; mmu-miR-1960; mmu-miR-29b; mmu-miR-16; mmu-miR-148a; mmu-miR-760-5p; mmu-miR-674; mmu-miR-467f; mmu-miR-296-5p; mmu-miR-762; mmu-miR-291b-3p; mmu-miR-21; mmu-miR-669o-5p; mmu-miR-34c; mmu-miR-152; mmu-miR-29a; mmu-miR-205; mmu-miR-29c; mmu-miR-760-3p; mmu-miR-34a; mmu-miR-27a; mmu-miR-15a; mmu-miR-382; mmu-miR-541; mmu-miR-1983; mmu-miR-376b; mmu-miR-1952; …
ARRDC2	0.863	14	16.2225	mmu-miR-330; mmu-miR-155; mmu-miR-350; mmu-miR-22; mmu-miR-27a; mmu-miR-378; mmu-miR-382; mmu-miR-125a-5p; mmu-miR-1983; mmu-miR-150; mmu-miR-125b-5p; mmu-miR-1935; mmu-miR-292-5p; mmu-miR-410
ARRDC3	8.135	57	7.00676	mmu-miR-29b; mmu-miR-495; mmu-miR-335-5p; mmu-miR-130a; mmu-miR-96; mmu-miR-431; mmu-miR-19a; mmu-miR-130b; mmu-miR-340-5p; mmu-miR-467f; mmu-miR-323-3p; mmu-miR-669o-5p; mmu-miR-181a; mmu-miR-29c; mmu-miR-132; mmu-miR-367; mmu-miR-669f-3p; mmu-miR-543; mmu-miR-669o-3p; mmu-miR-1198-5p; mmu-miR-182; mmu-miR-1983; mmu-miR-468; mmu-miR-129-2-3p; mmu-miR-1952; mmu-miR-129-1-3p; mmu-miR-19b; mmu-miR-…
ARRDC4	3.522	60	17.0358	mmu-miR-29b; mmu-miR-96; mmu-miR-200b; mmu-miR-431; mmu-miR-466g; mmu-miR-19a; mmu-miR-340-5p; mmu-miR-669o-5p; mmu-miR-181a; mmu-miR-29c; mmu-miR-155; mmu-miR-543; mmu-miR-367; mmu-let-7a; mmu-miR-132; mmu-miR-669o-3p; mmu-miR-27a; mmu-miR-541; mmu-miR-103; mmu-miR-182; mmu-miR-129-2-3p; mmu-miR-202-3p; mmu-miR-1952; mmu-miR-421; mmu-miR-129-1-3p; mmu-miR-19b; mmu-miR-669a-3p; mmu-miR-32; mmu-le…
ARSB	2.551	37	14.5041	mmu-miR-200a; mmu-miR-145; mmu-miR-495; mmu-miR-200b; mmu-miR-431; mmu-miR-369-3p; mmu-miR-291a-5p; mmu-miR-543; mmu-miR-291b-5p; mmu-miR-669o-3p; mmu-miR-34a; mmu-miR-27a; mmu-miR-468; mmu-miR-202-3p; mmu-miR-154; mmu-miR-302a; mmu-miR-669a-3p; mmu-miR-302d; mmu-miR-124; mmu-miR-1960; mmu-miR-350; mmu-miR-429; mmu-miR-136; mmu-miR-872; mmu-miR-374; mmu-miR-295; mmu-miR-762; mmu-miR-141; mmu-miR-…
ARSI	2.204	41	18.6025	mmu-miR-29b; mmu-miR-335-5p; mmu-miR-713; mmu-miR-150; mmu-miR-296-5p; mmu-miR-291a-5p; mmu-miR-29c; mmu-miR-291b-5p; mmu-let-7a; mmu-miR-34a; mmu-miR-27a; mmu-miR-1983; mmu-miR-202-3p; mmu-miR-421; mmu-miR-423-5p; mmu-let-7g; mmu-miR-195; mmu-miR-669l; mmu-miR-125a-5p; mmu-miR-16; mmu-miR-374; mmu-miR-669f-5p; mmu-miR-484; mmu-miR-125b-5p; mmu-miR-762; mmu-miR-376c; mmu-let-7c; mmu-miR-34c; mmu-…
ARSJ	2.376	49	20.6229	mmu-miR-145; mmu-miR-96; mmu-miR-19a; mmu-miR-150; mmu-miR-369-3p; mmu-miR-466b-3p; mmu-miR-296-5p; mmu-miR-291a-5p; mmu-miR-21; mmu-miR-181a; mmu-miR-290-3p; mmu-miR-155; mmu-miR-205; mmu-miR-291b-5p; mmu-let-7a; mmu-miR-27a; mmu-miR-467a; mmu-miR-541; mmu-miR-182; mmu-miR-202-3p; mmu-miR-26b; mmu-miR-292-3p; mmu-miR-381; mmu-miR-19b; mmu-miR-423-5p; mmu-miR-466a-3p; mmu-let-7g; mmu-miR-433; mmu…
ARSK	3.472	32	9.21659	mmu-miR-433; mmu-miR-350; mmu-miR-297c; mmu-miR-148b; mmu-miR-124; mmu-miR-145; mmu-miR-29b; mmu-miR-136; mmu-miR-374; mmu-miR-148a; mmu-miR-466g; mmu-miR-23b; mmu-miR-762; mmu-miR-296-5p; mmu-miR-291a-5p; mmu-miR-1196; mmu-miR-291b-3p; mmu-miR-152; mmu-miR-669o-5p; mmu-miR-335-3p; mmu-miR-29a; mmu-miR-127; mmu-miR-29c; mmu-miR-291b-5p; mmu-miR-382; mmu-miR-532-5p; mmu-miR-182; mmu-miR-329; mmu-m…
ART5	0.684	3	4.38596	mmu-miR-376b; mmu-miR-335-5p; mmu-miR-760-5p
ARTN	4.613	26	5.63625	mmu-miR-1960; mmu-miR-136; mmu-miR-1198-3p; mmu-miR-760-5p; mmu-miR-19a; mmu-miR-150; mmu-miR-296-5p; mmu-miR-762; mmu-miR-376c; mmu-miR-377; mmu-miR-669o-5p; mmu-miR-34c; mmu-miR-1945; mmu-miR-127; mmu-miR-760-3p; mmu-miR-22; mmu-miR-34a; mmu-miR-1893; mmu-miR-27a; mmu-miR-1198-5p; mmu-miR-423-3p; mmu-miR-1983; mmu-miR-1952; mmu-miR-672; mmu-miR-1935; mmu-miR-19b
ARV1	1.361	34	24.9816	mmu-miR-29b; mmu-miR-804; mmu-miR-93; mmu-miR-466g; mmu-miR-674; mmu-miR-20a; mmu-miR-29c; mmu-let-7a; mmu-miR-106a; mmu-miR-103; mmu-miR-17; mmu-miR-202-3p; mmu-miR-302a; mmu-let-7g; mmu-miR-195; mmu-miR-302d; mmu-miR-142-3p; mmu-miR-1960; mmu-miR-16; mmu-miR-20b; mmu-miR-295; mmu-miR-762; mmu-let-7c; mmu-miR-377; mmu-miR-741; mmu-miR-29a; mmu-miR-760-3p; mmu-miR-15a; mmu-miR-106b; mmu-miR-193b;…
ARVCF	22.415	50	2.23065	mmu-miR-145; mmu-miR-29b; mmu-miR-495; mmu-miR-335-5p; mmu-miR-713; mmu-miR-804; mmu-miR-96; mmu-miR-431; mmu-miR-674; mmu-miR-340-5p; mmu-miR-296-5p; mmu-miR-30d; mmu-miR-291a-5p; mmu-miR-30a; mmu-miR-290-3p; mmu-miR-29c; mmu-miR-155; mmu-miR-291b-5p; mmu-miR-132; mmu-miR-543; mmu-miR-34a; mmu-miR-467a; mmu-miR-30b; mmu-miR-103; mmu-miR-182; mmu-miR-292-3p; mmu-miR-421; mmu-miR-672; mmu-miR-302a…
ARX	2.39	31	12.9707	mmu-miR-302d; mmu-miR-467e; mmu-miR-713; mmu-miR-130a; mmu-miR-466g; mmu-miR-467c; mmu-miR-130b; mmu-miR-295; mmu-miR-376c; mmu-miR-762; mmu-miR-323-3p; mmu-miR-1196; mmu-miR-291b-3p; mmu-miR-34c; mmu-miR-290-3p; mmu-miR-132; mmu-miR-669f-3p; mmu-miR-543; mmu-miR-1893; mmu-miR-34a; mmu-miR-27a; mmu-miR-467a; mmu-miR-301a; mmu-miR-467h; mmu-miR-291a-3p; mmu-miR-292-3p; mmu-miR-1952; mmu-miR-381; m…
AS3MT	0.635	7	11.0236	mmu-miR-335-3p; mmu-miR-134; mmu-miR-23b; mmu-miR-713; mmu-miR-23a; mmu-miR-466g; mmu-miR-532-5p
ASAH1	6.765	64	9.46046	mmu-miR-145; mmu-miR-495; mmu-miR-335-5p; mmu-miR-713; mmu-miR-804; mmu-miR-431; mmu-miR-340-5p; mmu-miR-30d; mmu-miR-30a; mmu-miR-323-3p; mmu-miR-21; mmu-miR-367; mmu-let-7a; mmu-miR-468; mmu-miR-202-3p; mmu-miR-381; mmu-miR-669a-3p; mmu-miR-466a-3p; mmu-let-7g; mmu-miR-195; mmu-miR-23b; mmu-miR-377; mmu-miR-1196; mmu-miR-335-3p; mmu-miR-134; mmu-miR-15a; mmu-let-7e; mmu-miR-329; mmu-miR-1224; m…
ASAP1	26.799	83	3.09713	mmu-miR-495; mmu-miR-804; mmu-miR-96; mmu-miR-466g; mmu-miR-467c; mmu-miR-19a; mmu-miR-340-5p; mmu-miR-296-5p; mmu-miR-30d; mmu-miR-466b-3p; mmu-miR-30a; mmu-miR-21; mmu-miR-290-3p; mmu-miR-669f-3p; mmu-let-7a; mmu-miR-1893; mmu-miR-191; mmu-miR-468; mmu-miR-202-3p; mmu-miR-154; mmu-miR-292-3p; mmu-miR-302a; mmu-miR-466a-3p; mmu-miR-302d; mmu-let-7g; mmu-miR-195; mmu-miR-148b; mmu-miR-136; mmu-mi…
ASAP3	1.428	14	9.80392	mmu-miR-669o-5p; mmu-miR-145; mmu-miR-669l; mmu-miR-669a-5p; mmu-miR-378; mmu-miR-125a-5p; mmu-miR-466g; mmu-miR-669f-5p; mmu-miR-150; mmu-miR-125b-5p; mmu-miR-762; mmu-miR-28; mmu-miR-101b; mmu-miR-741
ASB1	9.68	77	7.95455	mmu-miR-495; mmu-miR-335-5p; mmu-miR-713; mmu-miR-466g; mmu-miR-467c; mmu-miR-19a; mmu-miR-296-5p; mmu-miR-21; mmu-miR-290-3p; mmu-miR-367; mmu-miR-468; mmu-miR-381; mmu-miR-292-3p; mmu-miR-302a; mmu-miR-466a-3p; mmu-miR-302d; mmu-miR-195; mmu-miR-433; mmu-miR-124; mmu-miR-148b; mmu-miR-136; mmu-miR-125a-5p; mmu-miR-760-5p; mmu-miR-148a; mmu-miR-295; mmu-miR-125b-5p; mmu-miR-23b; mmu-miR-377; mmu…
ASB13	1.595	36	22.5705	mmu-miR-93; mmu-miR-150; mmu-miR-20a; mmu-miR-467f; mmu-miR-290-3p; mmu-miR-669f-3p; mmu-miR-467a; mmu-miR-1198-5p; mmu-miR-106a; mmu-miR-17; mmu-miR-292-3p; mmu-miR-302a; mmu-miR-302d; mmu-miR-466a-3p; mmu-miR-142-3p; mmu-miR-1960; mmu-miR-297c; mmu-miR-125a-5p; mmu-miR-484; mmu-miR-20b; mmu-miR-295; mmu-miR-125b-5p; mmu-miR-762; mmu-miR-1196; mmu-miR-330; mmu-miR-22; mmu-miR-106b; mmu-miR-193b;…
ASB3	4.512	64	14.1844	mmu-miR-200a; mmu-miR-29b; mmu-miR-335-5p; mmu-miR-93; mmu-miR-467c; mmu-miR-369-3p; mmu-miR-20a; mmu-miR-467f; mmu-miR-340-5p; mmu-miR-30d; mmu-miR-291a-5p; mmu-miR-323-3p; mmu-miR-30a; mmu-miR-669o-5p; mmu-miR-29c; mmu-miR-290-3p; mmu-miR-543; mmu-miR-291b-5p; mmu-miR-132; mmu-miR-669f-3p; mmu-miR-467a; mmu-miR-27a; mmu-miR-30b; mmu-miR-1198-5p; mmu-miR-103; mmu-miR-182; mmu-miR-468; mmu-miR-10…
ASB7	7.678	50	6.51211	mmu-miR-200a; mmu-miR-495; mmu-miR-804; mmu-miR-130a; mmu-miR-431; mmu-miR-19a; mmu-miR-130b; mmu-miR-674; mmu-miR-340-5p; mmu-miR-467f; mmu-miR-296-5p; mmu-miR-30d; mmu-miR-30a; mmu-miR-323-3p; mmu-miR-669o-5p; mmu-miR-205; mmu-miR-132; mmu-miR-27a; mmu-miR-1198-5p; mmu-miR-30b; mmu-miR-182; mmu-miR-468; mmu-miR-129-2-3p; mmu-miR-672; mmu-miR-129-1-3p; mmu-miR-19b; mmu-miR-423-5p; mmu-miR-466a-3…
ASCC1	0.814	4	4.914	mmu-miR-330; mmu-miR-484; mmu-miR-762; mmu-miR-292-5p
ASCC2	5.586	64	11.4572	mmu-miR-335-5p; mmu-miR-713; mmu-miR-804; mmu-miR-93; mmu-miR-467c; mmu-miR-19a; mmu-miR-150; mmu-miR-674; mmu-miR-20a; mmu-miR-466b-3p; mmu-miR-28; mmu-miR-669o-5p; mmu-miR-290-3p; mmu-miR-543; mmu-miR-132; mmu-miR-669f-3p; mmu-miR-467a; mmu-miR-27a; mmu-miR-1983; mmu-miR-468; mmu-miR-106a; mmu-miR-17; mmu-miR-26b; mmu-miR-421; mmu-miR-1952; mmu-miR-292-3p; mmu-miR-302a; mmu-miR-19b; mmu-miR-302…
ASCC3	0.742	11	14.8248	mmu-miR-132; mmu-miR-669f-3p; mmu-miR-30b; mmu-miR-376b; mmu-miR-468; mmu-miR-672; mmu-miR-23b; mmu-miR-30d; mmu-miR-23a; mmu-miR-30a; mmu-miR-101b
ASCL1	2.481	34	13.7042	mmu-miR-369-3p; mmu-miR-467f; mmu-miR-291a-5p; mmu-miR-323-3p; mmu-miR-434-3p; mmu-miR-669f-3p; mmu-miR-291b-5p; mmu-miR-34a; mmu-miR-129-2-3p; mmu-miR-26b; mmu-miR-1952; mmu-miR-129-1-3p; mmu-miR-423-5p; mmu-miR-124; mmu-miR-148b; mmu-miR-1960; mmu-miR-350; mmu-miR-136; mmu-miR-125a-5p; mmu-miR-374; mmu-miR-148a; mmu-miR-484; mmu-miR-125b-5p; mmu-miR-18b; mmu-miR-762; mmu-miR-741; mmu-miR-152; m…
ASCL2	2.636	29	11.0015	mmu-let-7g; mmu-miR-302d; mmu-miR-124; mmu-miR-93; mmu-miR-760-5p; mmu-miR-484; mmu-miR-20b; mmu-miR-295; mmu-miR-20a; mmu-miR-296-5p; mmu-miR-30d; mmu-let-7c; mmu-miR-30a; mmu-let-7a; mmu-miR-1893; mmu-miR-30b; mmu-miR-106b; mmu-miR-193b; mmu-let-7e; mmu-miR-106a; mmu-miR-17; mmu-miR-291a-3p; mmu-miR-26b; mmu-miR-1952; mmu-miR-33; mmu-miR-26a; mmu-miR-1935; mmu-miR-302a; mmu-miR-294
ASF1A	1.549	51	32.9245	mmu-miR-145; mmu-miR-713; mmu-miR-804; mmu-miR-93; mmu-miR-200b; mmu-miR-467c; mmu-miR-20a; mmu-miR-340-5p; mmu-miR-30d; mmu-miR-466b-3p; mmu-miR-30a; mmu-miR-669o-5p; mmu-miR-21; mmu-miR-290-3p; mmu-miR-669f-3p; mmu-miR-543; mmu-miR-669o-3p; mmu-miR-27a; mmu-miR-467a; mmu-miR-30b; mmu-miR-106a; mmu-miR-17; mmu-miR-292-3p; mmu-miR-381; mmu-miR-302a; mmu-miR-669a-3p; mmu-miR-302d; mmu-miR-433; mmu…
ASF1B	1.064	26	24.4361	mmu-miR-195; mmu-miR-302d; mmu-miR-130a; mmu-miR-16; mmu-miR-760-5p; mmu-miR-19a; mmu-miR-484; mmu-miR-130b; mmu-miR-295; mmu-miR-340-5p; mmu-miR-467f; mmu-miR-335-3p; mmu-miR-669f-3p; mmu-miR-378; mmu-miR-15a; mmu-miR-301a; mmu-miR-376b; mmu-miR-291a-3p; mmu-miR-329; mmu-miR-142-5p; mmu-miR-381; mmu-miR-302a; mmu-miR-15b; mmu-miR-294; mmu-miR-19b; mmu-miR-410
ASH2L	7.249	27	3.72465	mmu-miR-195; mmu-miR-350; mmu-miR-669l; mmu-miR-16; mmu-miR-872; mmu-miR-669f-5p; mmu-miR-484; mmu-miR-340-5p; mmu-miR-762; mmu-miR-291a-5p; mmu-miR-669o-5p; mmu-miR-21; mmu-miR-34c; mmu-miR-205; mmu-miR-760-3p; mmu-miR-291b-5p; mmu-miR-34a; mmu-miR-669a-5p; mmu-miR-15a; mmu-miR-183; mmu-miR-103; mmu-miR-129-2-3p; mmu-miR-1952; mmu-miR-381; mmu-miR-129-1-3p; mmu-miR-292-5p; mmu-miR-15b
ASNA1	0.329	14	42.5532	mmu-let-7g; mmu-miR-195; mmu-let-7a; mmu-miR-132; mmu-miR-15a; mmu-miR-16; mmu-miR-19a; mmu-let-7e; mmu-miR-1224; mmu-miR-202-3p; mmu-miR-1935; mmu-miR-15b; mmu-let-7c; mmu-miR-19b
ASNS	1.877	14	7.45871	mmu-miR-434-3p; mmu-miR-205; mmu-miR-335-3p; mmu-miR-495; mmu-miR-134; mmu-miR-96; mmu-miR-374; mmu-miR-376b; mmu-miR-103; mmu-miR-182; mmu-miR-674; mmu-miR-1952; mmu-miR-421; mmu-miR-1935
ASNSD1	6.482	42	6.47948	mmu-miR-200a; mmu-miR-145; mmu-miR-335-5p; mmu-miR-713; mmu-miR-96; mmu-miR-431; mmu-miR-466g; mmu-miR-296-5p; mmu-miR-181a; mmu-miR-155; mmu-let-7a; mmu-miR-1983; mmu-miR-182; mmu-miR-103; mmu-miR-129-2-3p; mmu-miR-202-3p; mmu-miR-129-1-3p; mmu-miR-302a; mmu-miR-302d; mmu-let-7g; mmu-miR-195; mmu-miR-350; mmu-miR-124; mmu-miR-297c; mmu-miR-136; mmu-miR-16; mmu-miR-295; mmu-let-7c; mmu-miR-741; m…
ASPG	0.912	21	23.0263	mmu-miR-195; mmu-miR-200a; mmu-miR-145; mmu-miR-16; mmu-miR-1198-3p; mmu-miR-150; mmu-miR-674; mmu-miR-762; mmu-miR-28; mmu-miR-141; mmu-miR-330; mmu-miR-290-3p; mmu-miR-760-3p; mmu-miR-22; mmu-miR-467a; mmu-miR-15a; mmu-miR-103; mmu-miR-1224; mmu-miR-292-3p; mmu-miR-292-5p; mmu-miR-15b
ASPH	24.977	111	4.44409	mmu-miR-145; mmu-miR-495; mmu-miR-335-5p; mmu-miR-713; mmu-miR-804; mmu-miR-93; mmu-miR-96; mmu-miR-431; mmu-miR-466g; mmu-miR-19a; mmu-miR-20a; mmu-miR-340-5p; mmu-miR-30d; mmu-miR-466b-3p; mmu-miR-30a; mmu-miR-323-3p; mmu-miR-434-3p; mmu-let-7a; mmu-miR-367; mmu-miR-669f-3p; mmu-miR-1893; mmu-miR-106a; mmu-miR-468; mmu-miR-129-2-3p; mmu-miR-17; mmu-miR-202-3p; mmu-miR-381; mmu-miR-129-1-3p; mmu…
ASPHD2	1.502	17	11.3182	mmu-miR-130a; mmu-miR-125a-5p; mmu-miR-669d; mmu-miR-19a; mmu-miR-130b; mmu-miR-125b-5p; mmu-miR-330; mmu-miR-34c; mmu-miR-760-3p; mmu-miR-132; mmu-miR-134; mmu-miR-22; mmu-miR-34a; mmu-miR-378; mmu-miR-301a; mmu-miR-33; mmu-miR-19b
ASPM	0.886	8	9.02935	mmu-miR-466a-3p; mmu-miR-466c-3p; mmu-miR-467e; mmu-miR-669f-3p; mmu-miR-183; mmu-miR-467h; mmu-miR-541; mmu-miR-466b-3p
ASPSCR1	2.35	28	11.9149	mmu-miR-195; mmu-miR-124; mmu-miR-145; mmu-miR-669l; mmu-miR-93; mmu-miR-125a-5p; mmu-miR-16; mmu-miR-20b; mmu-miR-669f-5p; mmu-miR-484; mmu-miR-20a; mmu-miR-125b-5p; mmu-miR-296-5p; mmu-miR-762; mmu-miR-741; mmu-miR-291b-3p; mmu-miR-330; mmu-miR-205; mmu-miR-134; mmu-miR-760-3p; mmu-miR-669a-5p; mmu-miR-27a; mmu-miR-15a; mmu-miR-106b; mmu-miR-423-3p; mmu-miR-106a; mmu-miR-17; mmu-miR-15b
ASRGL1	3.665	50	13.6426	mmu-miR-145; mmu-miR-495; mmu-miR-804; mmu-miR-93; mmu-miR-150; mmu-miR-20a; mmu-miR-434-3p; mmu-miR-21; mmu-miR-290-3p; mmu-miR-155; mmu-miR-543; mmu-miR-467a; mmu-miR-27a; mmu-miR-1198-5p; mmu-miR-106a; mmu-miR-468; mmu-miR-1983; mmu-miR-17; mmu-miR-129-2-3p; mmu-miR-26b; mmu-miR-1952; mmu-miR-292-3p; mmu-miR-129-1-3p; mmu-miR-195; mmu-miR-142-3p; mmu-miR-16; mmu-miR-669d; mmu-miR-484; mmu-miR-…
ASS1	0.301	7	23.2558	mmu-miR-182; mmu-miR-34c; mmu-miR-155; mmu-miR-205; mmu-miR-22; mmu-miR-34a; mmu-miR-96
ASTN2	1.774	5	2.81849	mmu-miR-155; mmu-miR-1224; mmu-miR-1952; mmu-miR-335-5p; mmu-miR-760-5p
ASXL1	4.77	66	13.8365	mmu-miR-145; mmu-miR-335-5p; mmu-miR-713; mmu-miR-804; mmu-miR-96; mmu-miR-431; mmu-miR-466g; mmu-miR-29c; mmu-let-7a; mmu-miR-381; mmu-miR-466a-3p; mmu-let-7g; mmu-miR-433; mmu-miR-124; mmu-miR-669l; mmu-miR-136; mmu-miR-125a-5p; mmu-miR-760-5p; mmu-miR-669f-5p; mmu-miR-125b-5p; mmu-miR-23b; mmu-miR-377; mmu-miR-34c; mmu-miR-330; mmu-miR-1945; mmu-miR-335-3p; mmu-miR-134; mmu-miR-183; mmu-let-7e…
ASXL2	22.998	117	5.0874	mmu-miR-145; mmu-miR-495; mmu-miR-335-5p; mmu-miR-713; mmu-miR-93; mmu-miR-96; mmu-miR-431; mmu-miR-466g; mmu-miR-19a; mmu-miR-467c; mmu-miR-20a; mmu-miR-340-5p; mmu-miR-466b-3p; mmu-miR-323-3p; mmu-miR-290-3p; mmu-miR-155; mmu-miR-367; mmu-miR-669f-3p; mmu-miR-106a; mmu-miR-468; mmu-miR-129-2-3p; mmu-miR-17; mmu-miR-154; mmu-miR-292-3p; mmu-miR-381; mmu-miR-129-1-3p; mmu-miR-302a; mmu-miR-669a-3…
ASXL3	16.85	101	5.99407	mmu-miR-145; mmu-miR-495; mmu-miR-335-5p; mmu-miR-713; mmu-miR-93; mmu-miR-96; mmu-miR-19a; mmu-miR-20a; mmu-miR-340-5p; mmu-miR-296-5p; mmu-miR-30d; mmu-miR-28; mmu-miR-30a; mmu-miR-323-3p; mmu-miR-434-3p; mmu-miR-155; mmu-miR-29c; mmu-let-7a; mmu-miR-669f-3p; mmu-miR-106a; mmu-miR-468; mmu-miR-129-2-3p; mmu-miR-17; mmu-miR-202-3p; mmu-miR-672; mmu-miR-129-1-3p; mmu-miR-302a; mmu-miR-302d; mmu-l…
ATAD1	1.802	27	14.9834	mmu-miR-466a-3p; mmu-miR-495; mmu-miR-804; mmu-miR-136; mmu-miR-466g; mmu-miR-760-5p; mmu-miR-669d; mmu-miR-484; mmu-miR-674; mmu-miR-23b; mmu-miR-18b; mmu-miR-340-5p; mmu-miR-467f; mmu-miR-30d; mmu-miR-30a; mmu-miR-323-3p; mmu-miR-434-3p; mmu-miR-1196; mmu-miR-330; mmu-miR-181a; mmu-miR-543; mmu-miR-669f-3p; mmu-miR-30b; mmu-miR-329; mmu-miR-672; mmu-miR-23a; mmu-miR-410
ATAD2	1.525	42	27.541	mmu-miR-467e; mmu-miR-495; mmu-miR-804; mmu-miR-93; mmu-miR-96; mmu-miR-369-3p; mmu-miR-20a; mmu-miR-340-5p; mmu-miR-467f; mmu-miR-296-5p; mmu-miR-30d; mmu-miR-30a; mmu-miR-30b; mmu-miR-467h; mmu-miR-1983; mmu-miR-182; mmu-miR-106a; mmu-miR-17; mmu-miR-26b; mmu-miR-381; mmu-miR-421; mmu-miR-302a; mmu-miR-302d; mmu-miR-466a-3p; mmu-miR-1960; mmu-miR-669l; mmu-miR-136; mmu-miR-374; mmu-miR-669f-5p;…
ATAD3A	4.053	47	11.5963	mmu-miR-29b; mmu-miR-713; mmu-miR-130a; mmu-miR-96; mmu-miR-431; mmu-miR-466g; mmu-miR-130b; mmu-miR-674; mmu-miR-296-5p; mmu-miR-181a; mmu-miR-29c; mmu-miR-205; mmu-let-7a; mmu-miR-34a; mmu-miR-126-3p; mmu-miR-27a; mmu-miR-182; mmu-miR-129-2-3p; mmu-miR-202-3p; mmu-miR-129-1-3p; mmu-let-7g; mmu-miR-433; mmu-miR-350; mmu-miR-148b; mmu-miR-1960; mmu-miR-136; mmu-miR-872; mmu-miR-125a-5p; mmu-miR-1…
ATAD5	3.004	34	11.3182	mmu-miR-29b; mmu-miR-495; mmu-miR-130a; mmu-miR-130b; mmu-miR-369-3p; mmu-miR-467f; mmu-miR-30d; mmu-miR-28; mmu-miR-323-3p; mmu-miR-30a; mmu-miR-434-3p; mmu-miR-181a; mmu-miR-205; mmu-miR-29c; mmu-miR-669f-3p; mmu-miR-543; mmu-miR-27a; mmu-miR-30b; mmu-miR-182; mmu-miR-381; mmu-miR-124; mmu-miR-1960; mmu-miR-350; mmu-miR-374; mmu-miR-720; mmu-miR-377; mmu-miR-29a; mmu-miR-335-3p; mmu-miR-22; mmu…
ATE1	6.768	59	8.71749	mmu-miR-200a; mmu-miR-495; mmu-miR-335-5p; mmu-miR-804; mmu-miR-93; mmu-miR-200b; mmu-miR-431; mmu-miR-150; mmu-miR-20a; mmu-miR-369-3p; mmu-miR-674; mmu-miR-340-5p; mmu-miR-467f; mmu-miR-296-5p; mmu-miR-181a; mmu-miR-155; mmu-miR-205; mmu-miR-132; mmu-miR-543; mmu-miR-669o-3p; mmu-miR-103; mmu-miR-106a; mmu-miR-1983; mmu-miR-17; mmu-miR-154; mmu-miR-302a; mmu-miR-669a-3p; mmu-miR-302d; mmu-miR-1…
ATF1	4.63	24	5.18359	mmu-miR-350; mmu-miR-495; mmu-miR-136; mmu-miR-466g; mmu-miR-760-5p; mmu-miR-340-5p; mmu-miR-466b-3p; mmu-miR-30d; mmu-miR-291a-5p; mmu-miR-30a; mmu-miR-323-3p; mmu-miR-466c-3p; mmu-miR-205; mmu-miR-335-3p; mmu-miR-291b-5p; mmu-miR-27a; mmu-miR-30b; mmu-miR-193b; mmu-miR-423-3p; mmu-miR-142-5p; mmu-miR-154; mmu-miR-1952; mmu-miR-1935; mmu-miR-410
ATF2	32.571	82	2.51758	mmu-miR-495; mmu-miR-335-5p; mmu-miR-713; mmu-miR-804; mmu-miR-93; mmu-miR-96; mmu-miR-466g; mmu-miR-19a; mmu-miR-20a; mmu-miR-340-5p; mmu-miR-30d; mmu-miR-30a; mmu-miR-323-3p; mmu-let-7a; mmu-miR-468; mmu-miR-106a; mmu-miR-17; mmu-miR-202-3p; mmu-miR-381; mmu-miR-672; mmu-miR-669a-3p; mmu-let-7g; mmu-miR-195; mmu-miR-148b; mmu-miR-669l; mmu-miR-136; mmu-miR-148a; mmu-miR-669f-5p; mmu-miR-20b; mm…
ATF3	3.612	48	13.289	mmu-miR-200a; mmu-miR-145; mmu-miR-713; mmu-miR-93; mmu-miR-96; mmu-miR-200b; mmu-miR-466g; mmu-miR-19a; mmu-miR-150; mmu-miR-20a; mmu-miR-674; mmu-miR-291a-5p; mmu-miR-290-3p; mmu-miR-205; mmu-miR-291b-5p; mmu-miR-132; mmu-miR-1893; mmu-miR-467a; mmu-miR-106a; mmu-miR-17; mmu-miR-1952; mmu-miR-292-3p; mmu-miR-19b; mmu-miR-423-5p; mmu-miR-195; mmu-miR-669l; mmu-miR-429; mmu-miR-872; mmu-miR-16; m…
ATF4	0.907	13	14.333	mmu-miR-195; mmu-miR-330; mmu-miR-205; mmu-miR-335-3p; mmu-miR-335-5p; mmu-miR-15a; mmu-miR-16; mmu-miR-431; mmu-miR-541; mmu-miR-484; mmu-miR-15b; mmu-miR-151-5p; mmu-miR-423-5p
ATF5	2.528	21	8.30696	mmu-miR-142-3p; mmu-miR-200a; mmu-miR-145; mmu-miR-350; mmu-miR-713; mmu-miR-125a-5p; mmu-miR-760-5p; mmu-miR-669d; mmu-miR-484; mmu-miR-125b-5p; mmu-miR-467f; mmu-miR-30d; mmu-miR-762; mmu-miR-30a; mmu-miR-141; mmu-miR-205; mmu-miR-30b; mmu-miR-541; mmu-miR-1935; mmu-miR-466f; mmu-miR-423-5p
ATF6	5.631	89	15.8054	mmu-miR-335-5p; mmu-miR-713; mmu-miR-96; mmu-miR-431; mmu-miR-466g; mmu-miR-340-5p; mmu-miR-296-5p; mmu-miR-466b-3p; mmu-miR-30d; mmu-miR-28; mmu-miR-30a; mmu-miR-434-3p; mmu-miR-21; mmu-miR-155; mmu-miR-367; mmu-miR-541; mmu-miR-468; mmu-miR-154; mmu-miR-302a; mmu-miR-466a-3p; mmu-miR-302d; mmu-miR-195; mmu-miR-148b; mmu-miR-669l; mmu-miR-125a-5p; mmu-miR-760-5p; mmu-miR-1198-3p; mmu-miR-148a; m…
ATF7IP	8.794	64	7.27769	mmu-miR-200a; mmu-miR-29b; mmu-miR-495; mmu-miR-335-5p; mmu-miR-713; mmu-miR-93; mmu-miR-130a; mmu-miR-96; mmu-miR-19a; mmu-miR-130b; mmu-miR-20a; mmu-miR-340-5p; mmu-miR-291a-5p; mmu-miR-205; mmu-miR-29c; mmu-miR-543; mmu-miR-291b-5p; mmu-miR-132; mmu-miR-669f-3p; mmu-miR-669o-3p; mmu-miR-27a; mmu-miR-1198-5p; mmu-miR-1983; mmu-miR-468; mmu-miR-106a; mmu-miR-17; mmu-miR-26b; mmu-miR-421; mmu-miR…
ATF7IP2	1.801	53	29.4281	mmu-miR-200a; mmu-miR-495; mmu-miR-130a; mmu-miR-200b; mmu-miR-431; mmu-miR-19a; mmu-miR-130b; mmu-miR-150; mmu-miR-369-3p; mmu-miR-674; mmu-miR-30d; mmu-miR-30a; mmu-miR-181a; mmu-miR-669f-3p; mmu-miR-543; mmu-miR-30b; mmu-miR-202-3p; mmu-miR-1952; mmu-miR-421; mmu-miR-672; mmu-miR-302a; mmu-miR-19b; mmu-miR-195; mmu-miR-302d; mmu-miR-350; mmu-miR-124; mmu-miR-148b; mmu-miR-1960; mmu-miR-429; mm…
ATG10	1.013	17	16.7818	mmu-miR-32; mmu-miR-363-3p; mmu-miR-150; mmu-miR-467f; mmu-miR-340-5p; mmu-miR-291a-5p; mmu-miR-323-3p; mmu-miR-335-3p; mmu-miR-291b-5p; mmu-miR-367; mmu-miR-1198-5p; mmu-miR-193b; mmu-miR-25; mmu-miR-103; mmu-miR-329; mmu-miR-421; mmu-miR-1952
ATG12	2.093	35	16.7224	mmu-miR-431; mmu-miR-466g; mmu-miR-369-3p; mmu-miR-467f; mmu-miR-30d; mmu-miR-323-3p; mmu-miR-30a; mmu-miR-669o-5p; mmu-miR-205; mmu-miR-669f-3p; mmu-miR-543; mmu-miR-132; mmu-miR-30b; mmu-miR-1983; mmu-miR-26b; mmu-miR-421; mmu-miR-466a-3p; mmu-miR-433; mmu-miR-148b; mmu-miR-1960; mmu-miR-297c; mmu-miR-148a; mmu-miR-18b; mmu-miR-376c; mmu-miR-741; mmu-miR-377; mmu-miR-152; mmu-miR-134; mmu-miR-3…
ATG13	9.236	35	3.78952	mmu-miR-495; mmu-miR-335-5p; mmu-miR-466g; mmu-miR-19a; mmu-miR-674; mmu-miR-466b-3p; mmu-miR-205; mmu-miR-669o-3p; mmu-miR-27a; mmu-miR-191; mmu-miR-103; mmu-miR-1983; mmu-miR-423-5p; mmu-miR-19b; mmu-miR-195; mmu-miR-669a-3p; mmu-miR-1960; mmu-miR-350; mmu-miR-16; mmu-miR-484; mmu-miR-376c; mmu-miR-1196; mmu-miR-466c-3p; mmu-miR-330; mmu-miR-335-3p; mmu-miR-760-3p; mmu-miR-134; mmu-miR-22; mmu-…
ATG14	2.25	51	22.6667	mmu-miR-467e; mmu-miR-495; mmu-miR-335-5p; mmu-miR-804; mmu-miR-93; mmu-miR-130a; mmu-miR-466g; mmu-miR-19a; mmu-miR-130b; mmu-miR-150; mmu-miR-20a; mmu-miR-296-5p; mmu-miR-291a-5p; mmu-miR-434-3p; mmu-miR-290-3p; mmu-let-7a; mmu-miR-367; mmu-miR-291b-5p; mmu-miR-467a; mmu-miR-467h; mmu-miR-106a; mmu-miR-468; mmu-miR-17; mmu-miR-202-3p; mmu-miR-154; mmu-miR-1952; mmu-miR-292-3p; mmu-miR-381; mmu-…
ATG16L1	3.639	36	9.89283	mmu-miR-200a; mmu-miR-467e; mmu-miR-713; mmu-miR-93; mmu-miR-130a; mmu-miR-96; mmu-miR-19a; mmu-miR-130b; mmu-miR-20a; mmu-miR-205; mmu-let-7a; mmu-miR-34a; mmu-miR-1198-5p; mmu-miR-467h; mmu-miR-106a; mmu-miR-103; mmu-miR-17; mmu-miR-202-3p; mmu-miR-1952; mmu-miR-19b; mmu-let-7g; mmu-miR-142-3p; mmu-miR-484; mmu-miR-20b; mmu-let-7c; mmu-miR-377; mmu-miR-141; mmu-miR-291b-3p; mmu-miR-330; mmu-miR…
ATG16L2	9.282	39	4.20168	mmu-miR-200a; mmu-miR-145; mmu-miR-29b; mmu-miR-467e; mmu-miR-495; mmu-miR-96; mmu-miR-150; mmu-miR-674; mmu-miR-296-5p; mmu-miR-30d; mmu-miR-28; mmu-miR-30a; mmu-miR-29c; mmu-miR-205; mmu-miR-543; mmu-miR-34a; mmu-miR-27a; mmu-miR-30b; mmu-miR-467h; mmu-miR-182; mmu-miR-423-5p; mmu-miR-148b; mmu-miR-1960; mmu-miR-350; mmu-miR-148a; mmu-miR-669d; mmu-miR-23b; mmu-miR-741; mmu-miR-141; mmu-miR-152…
ATG2A	1.47	14	9.52381	mmu-miR-291b-3p; mmu-miR-127; mmu-miR-205; mmu-miR-93; mmu-miR-27a; mmu-miR-106b; mmu-miR-20b; mmu-miR-106a; mmu-miR-182; mmu-miR-17; mmu-miR-20a; mmu-miR-1935; mmu-miR-296-5p; mmu-miR-762
ATG2B	3.765	68	18.0611	mmu-miR-335-5p; mmu-miR-804; mmu-miR-93; mmu-miR-431; mmu-miR-466g; mmu-miR-20a; mmu-miR-296-5p; mmu-miR-323-3p; mmu-miR-434-3p; mmu-miR-29c; mmu-miR-290-3p; mmu-miR-1893; mmu-miR-106a; mmu-miR-17; mmu-miR-202-3p; mmu-miR-154; mmu-miR-292-3p; mmu-miR-672; mmu-miR-381; mmu-miR-669a-3p; mmu-miR-148b; mmu-miR-136; mmu-miR-760-5p; mmu-miR-148a; mmu-miR-20b; mmu-miR-23b; mmu-miR-377; mmu-miR-152; mmu-…
ATG3	0.879	17	19.3402	mmu-miR-669a-3p; mmu-miR-29b; mmu-miR-350; mmu-miR-431; mmu-miR-669d; mmu-miR-30d; mmu-miR-30a; mmu-miR-155; mmu-miR-29a; mmu-miR-29c; mmu-miR-669o-3p; mmu-miR-30b; mmu-miR-541; mmu-miR-26b; mmu-miR-1952; mmu-miR-381; mmu-miR-26a
ATG4A	1.03	20	19.4175	mmu-miR-145; mmu-miR-297c; mmu-miR-467e; mmu-miR-125a-5p; mmu-miR-466g; mmu-miR-674; mmu-miR-125b-5p; mmu-miR-30d; mmu-miR-291a-5p; mmu-miR-30a; mmu-miR-434-3p; mmu-miR-335-3p; mmu-miR-291b-5p; mmu-miR-30b; mmu-miR-467h; mmu-miR-423-3p; mmu-miR-103; mmu-miR-26b; mmu-miR-297a; mmu-miR-26a
ATG4B	1.749	30	17.1527	mmu-let-7g; mmu-miR-195; mmu-miR-142-3p; mmu-miR-804; mmu-miR-136; mmu-miR-125a-5p; mmu-miR-16; mmu-miR-760-5p; mmu-miR-674; mmu-miR-125b-5p; mmu-miR-762; mmu-let-7c; mmu-miR-28; mmu-miR-34c; mmu-miR-290-3p; mmu-let-7a; mmu-miR-34a; mmu-miR-15a; mmu-miR-467a; mmu-let-7e; mmu-miR-129-2-3p; mmu-miR-202-3p; mmu-miR-26b; mmu-miR-292-3p; mmu-miR-421; mmu-miR-26a; mmu-miR-1935; mmu-miR-129-1-3p; mmu-mi…
ATG4C	2.782	25	8.98634	mmu-let-7g; mmu-miR-142-3p; mmu-miR-124; mmu-miR-145; mmu-miR-350; mmu-miR-335-5p; mmu-miR-374; mmu-miR-466b-3p; mmu-let-7c; mmu-miR-291a-5p; mmu-miR-323-3p; mmu-miR-466c-3p; mmu-miR-335-3p; mmu-miR-669f-3p; mmu-let-7a; mmu-miR-291b-5p; mmu-miR-22; mmu-miR-1198-5p; mmu-let-7e; mmu-miR-376b; mmu-miR-1224; mmu-miR-381; mmu-miR-421; mmu-miR-672; mmu-miR-292-5p
ATG4D	1.115	21	18.8341	mmu-miR-29b; mmu-miR-125a-5p; mmu-miR-19a; mmu-miR-150; mmu-miR-340-5p; mmu-miR-125b-5p; mmu-miR-762; mmu-miR-376c; mmu-miR-28; mmu-miR-377; mmu-miR-29c; mmu-miR-29a; mmu-miR-134; mmu-miR-191; mmu-miR-1224; mmu-miR-26b; mmu-miR-1952; mmu-miR-26a; mmu-miR-1935; mmu-miR-292-5p; mmu-miR-19b
ATG5	1.376	26	18.8953	mmu-miR-200a; mmu-miR-145; mmu-miR-297c; mmu-miR-350; mmu-miR-136; mmu-miR-1198-3p; mmu-miR-30d; mmu-miR-291a-5p; mmu-miR-151-5p; mmu-miR-30a; mmu-miR-141; mmu-miR-181a; mmu-miR-335-3p; mmu-miR-760-3p; mmu-miR-543; mmu-miR-291b-5p; mmu-miR-27a; mmu-miR-30b; mmu-miR-103; mmu-miR-1983; mmu-miR-376b; mmu-miR-26b; mmu-miR-33; mmu-miR-421; mmu-miR-297a; mmu-miR-26a
ATG7	3.462	37	10.6875	mmu-miR-200a; mmu-miR-93; mmu-miR-130a; mmu-miR-96; mmu-miR-130b; mmu-miR-150; mmu-miR-20a; mmu-miR-28; mmu-miR-205; mmu-miR-34a; mmu-miR-1198-5p; mmu-miR-106a; mmu-miR-103; mmu-miR-182; mmu-miR-17; mmu-miR-672; mmu-miR-154; mmu-miR-302a; mmu-miR-302d; mmu-miR-20b; mmu-miR-295; mmu-miR-18b; mmu-miR-762; mmu-miR-141; mmu-miR-34c; mmu-miR-760-3p; mmu-miR-22; mmu-miR-99b; mmu-miR-378; mmu-miR-106b; …
ATG9A	1.066	29	27.2045	mmu-miR-195; mmu-miR-302d; mmu-miR-29b; mmu-miR-136; mmu-miR-96; mmu-miR-16; mmu-miR-669d; mmu-miR-150; mmu-miR-295; mmu-miR-376c; mmu-miR-762; mmu-miR-28; mmu-miR-34c; mmu-miR-335-3p; mmu-miR-29a; mmu-miR-29c; mmu-miR-22; mmu-miR-34a; mmu-miR-15a; mmu-miR-378; mmu-miR-541; mmu-miR-291a-3p; mmu-miR-1224; mmu-miR-1935; mmu-miR-15b; mmu-miR-302a; mmu-miR-294; mmu-miR-410; mmu-miR-423-5p
ATHL1	5.877	23	3.91356	mmu-miR-200a; mmu-miR-1960; mmu-miR-713; mmu-miR-136; mmu-miR-760-5p; mmu-miR-150; mmu-miR-674; mmu-miR-762; mmu-miR-291a-5p; mmu-miR-377; mmu-miR-141; mmu-miR-760-3p; mmu-miR-132; mmu-miR-134; mmu-miR-291b-5p; mmu-miR-378; mmu-miR-193b; mmu-miR-1983; mmu-miR-129-2-3p; mmu-miR-329; mmu-miR-672; mmu-miR-129-1-3p; mmu-miR-423-5p
ATIC	1.08	13	12.037	mmu-miR-330; mmu-miR-124; mmu-miR-145; mmu-miR-804; mmu-miR-468; mmu-miR-1224; mmu-miR-329; mmu-miR-340-5p; mmu-miR-1952; mmu-miR-18b; mmu-miR-376c; mmu-miR-28; mmu-miR-741
ATL2	3.774	35	9.27398	mmu-miR-495; mmu-miR-200b; mmu-miR-466g; mmu-miR-467f; mmu-miR-340-5p; mmu-miR-466b-3p; mmu-miR-30d; mmu-miR-291a-5p; mmu-miR-28; mmu-miR-30a; mmu-miR-205; mmu-miR-669f-3p; mmu-miR-543; mmu-miR-291b-5p; mmu-miR-30b; mmu-miR-154; mmu-miR-381; mmu-miR-466a-3p; mmu-miR-142-3p; mmu-miR-1960; mmu-miR-350; mmu-miR-429; mmu-miR-125a-5p; mmu-miR-374; mmu-miR-125b-5p; mmu-miR-377; mmu-miR-466c-3p; mmu-miR…
ATL3	11.438	88	7.69365	mmu-miR-145; mmu-miR-495; mmu-miR-713; mmu-miR-804; mmu-miR-93; mmu-miR-19a; mmu-miR-20a; mmu-miR-340-5p; mmu-miR-30d; mmu-miR-30a; mmu-miR-323-3p; mmu-miR-669f-3p; mmu-let-7a; mmu-miR-106a; mmu-miR-17; mmu-miR-129-2-3p; mmu-miR-202-3p; mmu-miR-381; mmu-miR-672; mmu-miR-129-1-3p; mmu-miR-302a; mmu-miR-669a-3p; mmu-miR-466a-3p; mmu-miR-302d; mmu-let-7g; mmu-miR-433; mmu-miR-124; mmu-miR-148b; mmu-…
ATM	4.755	70	14.7213	mmu-miR-495; mmu-miR-335-5p; mmu-miR-804; mmu-miR-93; mmu-miR-431; mmu-miR-466g; mmu-miR-19a; mmu-miR-20a; mmu-miR-340-5p; mmu-miR-28; mmu-miR-669f-3p; mmu-miR-541; mmu-miR-106a; mmu-miR-17; mmu-miR-129-2-3p; mmu-miR-381; mmu-miR-129-1-3p; mmu-miR-669a-3p; mmu-miR-466a-3p; mmu-miR-195; mmu-miR-124; mmu-miR-669l; mmu-miR-125a-5p; mmu-miR-1198-3p; mmu-miR-669f-5p; mmu-miR-20b; mmu-miR-125b-5p; mmu-…
ATMIN	4.193	71	16.933	mmu-miR-713; mmu-miR-96; mmu-miR-466g; mmu-miR-467c; mmu-miR-296-5p; mmu-miR-290-3p; mmu-let-7a; mmu-miR-1893; mmu-miR-468; mmu-miR-292-3p; mmu-miR-302a; mmu-miR-302d; mmu-let-7g; mmu-miR-195; mmu-miR-433; mmu-miR-124; mmu-miR-148b; mmu-miR-136; mmu-miR-125a-5p; mmu-miR-760-5p; mmu-miR-148a; mmu-miR-295; mmu-miR-23b; mmu-miR-125b-5p; mmu-miR-1196; mmu-miR-34c; mmu-miR-330; mmu-miR-152; mmu-miR-22…
ATN1	1.821	12	6.58979	mmu-miR-34c; mmu-miR-22; mmu-miR-34a; mmu-miR-484; mmu-miR-1983; mmu-miR-674; mmu-miR-376c; mmu-miR-762; mmu-miR-296-5p; mmu-miR-410; mmu-miR-28; mmu-miR-423-5p
ATOH1	2.088	31	14.8467	mmu-miR-195; mmu-miR-466a-3p; mmu-miR-495; mmu-miR-804; mmu-miR-130a; mmu-miR-16; mmu-miR-467c; mmu-miR-19a; mmu-miR-130b; mmu-miR-150; mmu-miR-296-5p; mmu-miR-466b-3p; mmu-miR-762; mmu-miR-101b; mmu-miR-466c-3p; mmu-miR-291b-3p; mmu-miR-34c; mmu-miR-205; mmu-miR-335-3p; mmu-miR-34a; mmu-miR-15a; mmu-miR-301a; mmu-miR-193b; mmu-miR-532-5p; mmu-miR-1983; mmu-miR-103; mmu-miR-376b; mmu-miR-33; mmu-…
ATOH8	0.979	24	24.5148	mmu-miR-302d; mmu-miR-467e; mmu-miR-96; mmu-miR-125a-5p; mmu-miR-467c; mmu-miR-295; mmu-miR-125b-5p; mmu-miR-762; mmu-miR-741; mmu-miR-291b-3p; mmu-miR-434-3p; mmu-miR-290-3p; mmu-miR-760-3p; mmu-miR-467a; mmu-miR-27a; mmu-miR-467h; mmu-miR-182; mmu-miR-103; mmu-miR-291a-3p; mmu-miR-1224; mmu-miR-292-3p; mmu-miR-1952; mmu-miR-302a; mmu-miR-294
ATOX1	0.685	10	14.5985	mmu-miR-34c; mmu-miR-495; mmu-miR-34a; mmu-miR-378; mmu-miR-760-5p; mmu-miR-468; mmu-miR-150; mmu-miR-1224; mmu-miR-421; mmu-miR-762
ATP10A	1.308	28	21.4067	mmu-miR-297c; mmu-miR-713; mmu-miR-804; mmu-miR-125a-5p; mmu-miR-431; mmu-miR-19a; mmu-miR-674; mmu-miR-125b-5p; mmu-miR-30d; mmu-miR-466b-3p; mmu-miR-151-5p; mmu-miR-30a; mmu-miR-466c-3p; mmu-miR-330; mmu-miR-543; mmu-miR-30b; mmu-miR-1198-5p; mmu-miR-193b; mmu-miR-423-3p; mmu-miR-26b; mmu-miR-202-3p; mmu-miR-329; mmu-miR-297a; mmu-miR-26a; mmu-miR-1935; mmu-miR-292-5p; mmu-miR-19b; mmu-miR-423-…
ATP11A	14.165	99	6.98906	mmu-miR-145; mmu-miR-335-5p; mmu-miR-713; mmu-miR-96; mmu-miR-431; mmu-miR-466g; mmu-miR-19a; mmu-miR-340-5p; mmu-miR-28; mmu-miR-323-3p; mmu-miR-29c; mmu-miR-290-3p; mmu-miR-155; mmu-miR-367; mmu-let-7a; mmu-miR-129-2-3p; mmu-miR-202-3p; mmu-miR-292-3p; mmu-miR-129-1-3p; mmu-miR-466a-3p; mmu-miR-195; mmu-let-7g; mmu-miR-124; mmu-miR-148b; mmu-miR-669l; mmu-miR-136; mmu-miR-125a-5p; mmu-miR-760-5…
ATP11B	2.471	22	8.90328	mmu-miR-495; mmu-miR-335-5p; mmu-miR-429; mmu-miR-200b; mmu-miR-466g; mmu-miR-674; mmu-miR-340-5p; mmu-miR-23b; mmu-miR-466b-3p; mmu-miR-101b; mmu-miR-741; mmu-miR-1196; mmu-miR-466c-3p; mmu-miR-181a; mmu-miR-21; mmu-miR-134; mmu-miR-193b; mmu-miR-468; mmu-miR-1224; mmu-miR-200c; mmu-miR-23a; mmu-miR-410
ATP12A	0.659	12	18.2094	mmu-miR-142-3p; mmu-miR-21; mmu-miR-124; mmu-miR-804; mmu-miR-468; mmu-miR-369-3p; mmu-miR-672; mmu-miR-23b; mmu-miR-376c; mmu-miR-23a; mmu-miR-410; mmu-miR-377
ATP13A1	0.331	10	30.2115	mmu-miR-34c; mmu-miR-124; mmu-miR-1960; mmu-miR-29a; mmu-miR-29b; mmu-miR-29c; mmu-miR-335-5p; mmu-miR-34a; mmu-miR-340-5p; mmu-miR-18b
ATP13A2	0.78	11	14.1026	mmu-miR-145; mmu-miR-134; mmu-miR-22; mmu-miR-93; mmu-miR-106b; mmu-miR-106a; mmu-miR-20b; mmu-miR-17; mmu-miR-20a; mmu-miR-1935; mmu-miR-741
ATP13A3	8.754	61	6.96824	mmu-miR-200a; mmu-miR-29b; mmu-miR-495; mmu-miR-335-5p; mmu-miR-804; mmu-miR-466g; mmu-miR-340-5p; mmu-miR-291a-5p; mmu-miR-323-3p; mmu-miR-29c; mmu-miR-205; mmu-miR-669f-3p; mmu-miR-543; mmu-miR-291b-5p; mmu-miR-669o-3p; mmu-miR-27a; mmu-miR-103; mmu-miR-202-3p; mmu-miR-154; mmu-miR-1952; mmu-miR-381; mmu-miR-421; mmu-miR-672; mmu-miR-669a-3p; mmu-miR-466a-3p; mmu-miR-195; mmu-miR-350; mmu-miR-1…
ATP1A1	1.262	14	11.0935	mmu-miR-141; mmu-miR-200a; mmu-miR-34c; mmu-miR-124; mmu-miR-205; mmu-miR-34a; mmu-miR-136; mmu-miR-378; mmu-miR-374; mmu-miR-466g; mmu-miR-760-5p; mmu-miR-669d; mmu-miR-369-3p; mmu-miR-1952
ATP1A3	4.543	19	4.18226	mmu-miR-124; mmu-miR-713; mmu-miR-431; mmu-miR-669d; mmu-miR-674; mmu-miR-720; mmu-miR-762; mmu-miR-741; mmu-miR-330; mmu-miR-1893; mmu-miR-22; mmu-miR-191; mmu-miR-1983; mmu-miR-376b; mmu-miR-468; mmu-miR-329; mmu-miR-1952; mmu-miR-1935; mmu-miR-466f
ATP1B1	1.409	33	23.4209	mmu-miR-200a; mmu-miR-29b; mmu-miR-467e; mmu-miR-335-5p; mmu-miR-713; mmu-miR-200b; mmu-miR-369-3p; mmu-miR-340-5p; mmu-miR-466b-3p; mmu-miR-291a-5p; mmu-miR-323-3p; mmu-miR-181a; mmu-miR-29c; mmu-miR-543; mmu-miR-291b-5p; mmu-miR-467h; mmu-miR-541; mmu-miR-672; mmu-miR-669l; mmu-miR-429; mmu-miR-125a-5p; mmu-miR-669f-5p; mmu-miR-125b-5p; mmu-miR-762; mmu-miR-101b; mmu-miR-741; mmu-miR-141; mmu-m…
ATP1B2	9.216	34	3.68924	mmu-miR-145; mmu-miR-19a; mmu-miR-340-5p; mmu-miR-296-5p; mmu-miR-28; mmu-miR-669o-5p; mmu-miR-181a; mmu-miR-669f-3p; mmu-miR-543; mmu-let-7a; mmu-miR-34a; mmu-miR-1893; mmu-miR-27a; mmu-miR-541; mmu-miR-103; mmu-miR-1983; mmu-miR-421; mmu-miR-19b; mmu-let-7g; mmu-miR-466a-3p; mmu-miR-484; mmu-miR-18b; mmu-miR-23b; mmu-let-7c; mmu-miR-101b; mmu-miR-330; mmu-miR-34c; mmu-miR-193b; mmu-let-7e; mmu-…
ATP2A2	1.092	36	32.967	mmu-miR-200a; mmu-miR-29b; mmu-miR-200b; mmu-miR-30d; mmu-miR-323-3p; mmu-miR-30a; mmu-miR-181a; mmu-miR-29c; mmu-miR-290-3p; mmu-miR-205; mmu-let-7a; mmu-miR-467a; mmu-miR-30b; mmu-miR-1198-5p; mmu-miR-182; mmu-miR-202-3p; mmu-miR-292-3p; mmu-let-7g; mmu-miR-195; mmu-miR-148b; mmu-miR-1960; mmu-miR-297c; mmu-miR-429; mmu-miR-16; mmu-miR-148a; mmu-miR-762; mmu-let-7c; mmu-miR-141; mmu-miR-152; mm…
ATP2A3	6.78	24	3.53982	mmu-let-7g; mmu-miR-136; mmu-miR-125a-5p; mmu-miR-1198-3p; mmu-miR-760-5p; mmu-miR-669d; mmu-miR-484; mmu-miR-125b-5p; mmu-miR-466b-3p; mmu-let-7c; mmu-miR-28; mmu-miR-466c-3p; mmu-miR-205; mmu-miR-760-3p; mmu-let-7a; mmu-miR-1893; mmu-miR-22; mmu-miR-378; mmu-miR-27a; mmu-let-7e; mmu-miR-329; mmu-miR-1935; mmu-miR-410; mmu-miR-423-5p
ATP2B1	3.336	49	14.6882	mmu-miR-29b; mmu-miR-495; mmu-miR-335-5p; mmu-miR-431; mmu-miR-466g; mmu-miR-150; mmu-miR-674; mmu-miR-340-5p; mmu-miR-467f; mmu-miR-30d; mmu-miR-466b-3p; mmu-miR-28; mmu-miR-30a; mmu-miR-669o-5p; mmu-miR-181a; mmu-miR-155; mmu-miR-29c; mmu-let-7a; mmu-miR-669f-3p; mmu-miR-27a; mmu-miR-1198-5p; mmu-miR-30b; mmu-miR-103; mmu-miR-468; mmu-miR-129-2-3p; mmu-miR-154; mmu-miR-381; mmu-miR-421; mmu-miR…
ATP2B3	0.183	3	16.3934	mmu-miR-350; mmu-miR-33; mmu-miR-101b
ATP2B4	18.678	83	4.44373	mmu-miR-145; mmu-miR-335-5p; mmu-miR-713; mmu-miR-96; mmu-miR-431; mmu-miR-467c; mmu-miR-340-5p; mmu-miR-30d; mmu-miR-466b-3p; mmu-miR-28; mmu-miR-30a; mmu-miR-323-3p; mmu-miR-434-3p; mmu-miR-29c; mmu-miR-290-3p; mmu-miR-669f-3p; mmu-let-7a; mmu-miR-191; mmu-miR-129-2-3p; mmu-miR-202-3p; mmu-miR-292-3p; mmu-miR-672; mmu-miR-129-1-3p; mmu-miR-302a; mmu-miR-669a-3p; mmu-miR-466a-3p; mmu-miR-302d; m…
ATP5A1	1.858	9	4.84392	mmu-miR-145; mmu-miR-350; mmu-miR-183; mmu-miR-376b; mmu-miR-329; mmu-miR-381; mmu-miR-1935; mmu-miR-292-5p; mmu-miR-377
ATP5B	0.373	8	21.4477	mmu-miR-21; mmu-miR-1960; mmu-miR-669f-3p; mmu-miR-760-5p; mmu-miR-669d; mmu-miR-720; mmu-miR-423-5p; mmu-miR-741
ATP5C1	0.47	2	4.25532	mmu-miR-335-3p; mmu-miR-382
ATP5D	1.188	3	2.52525	mmu-miR-1935; mmu-miR-382; mmu-miR-423-5p
ATP5E	0.972	11	11.3169	mmu-miR-195; mmu-miR-434-3p; mmu-miR-350; mmu-miR-15a; mmu-miR-16; mmu-miR-760-5p; mmu-miR-484; mmu-miR-1983; mmu-miR-672; mmu-miR-292-5p; mmu-miR-15b
ATP5F1	3.031	23	7.58825	mmu-miR-32; mmu-miR-145; mmu-miR-29b; mmu-miR-495; mmu-miR-335-5p; mmu-miR-136; mmu-miR-363-3p; mmu-miR-23b; mmu-miR-720; mmu-miR-376c; mmu-miR-762; mmu-miR-330; mmu-miR-29a; mmu-miR-29c; mmu-miR-367; mmu-miR-27a; mmu-miR-1198-5p; mmu-miR-193b; mmu-miR-25; mmu-miR-182; mmu-miR-381; mmu-miR-23a; mmu-miR-423-5p
ATP5G1	17.468	68	3.89283	mmu-miR-145; mmu-miR-495; mmu-miR-804; mmu-miR-96; mmu-miR-466g; mmu-miR-340-5p; mmu-miR-466b-3p; mmu-miR-434-3p; mmu-miR-21; mmu-miR-29c; mmu-miR-155; mmu-miR-669f-3p; mmu-miR-541; mmu-miR-129-2-3p; mmu-miR-381; mmu-miR-154; mmu-miR-129-1-3p; mmu-miR-302a; mmu-miR-302d; mmu-miR-195; mmu-miR-433; mmu-miR-148b; mmu-miR-136; mmu-miR-125a-5p; mmu-miR-760-5p; mmu-miR-1198-3p; mmu-miR-148a; mmu-miR-29…
ATP5G3	1.72	19	11.0465	mmu-miR-200a; mmu-miR-29b; mmu-miR-96; mmu-miR-762; mmu-miR-296-5p; mmu-miR-141; mmu-miR-1945; mmu-miR-330; mmu-miR-34c; mmu-miR-127; mmu-miR-29a; mmu-miR-29c; mmu-miR-335-3p; mmu-miR-34a; mmu-miR-103; mmu-miR-468; mmu-miR-182; mmu-miR-329; mmu-miR-1935
ATP5H	1.904	5	2.62605	mmu-miR-1983; mmu-miR-26b; mmu-miR-26a; mmu-miR-27a; mmu-miR-762
ATP5J	3.35	19	5.67164	mmu-miR-433; mmu-miR-124; mmu-miR-297c; mmu-miR-713; mmu-miR-804; mmu-miR-872; mmu-miR-674; mmu-miR-340-5p; mmu-miR-762; mmu-miR-21; mmu-miR-330; mmu-miR-669o-5p; mmu-miR-335-3p; mmu-miR-1893; mmu-miR-22; mmu-miR-329; mmu-miR-421; mmu-miR-142-5p; mmu-miR-297a
ATP5J2	0.744	1	1.34409	mmu-miR-423-3p
ATP5K	0.559	2	3.57782	mmu-miR-1945; mmu-miR-377
ATP5L	0.217	3	13.8249	mmu-miR-181a; mmu-miR-543; mmu-miR-421
ATP5O	2.226	13	5.84007	mmu-miR-433; mmu-miR-145; mmu-miR-205; mmu-miR-335-5p; mmu-miR-183; mmu-miR-193b; mmu-miR-541; mmu-miR-182; mmu-miR-103; mmu-miR-1952; mmu-miR-672; mmu-miR-1935; mmu-miR-377
ATP5S	0.94	18	19.1489	mmu-miR-1960; mmu-miR-495; mmu-miR-136; mmu-miR-741; mmu-miR-101b; mmu-miR-28; mmu-miR-323-3p; mmu-miR-34c; mmu-miR-34a; mmu-miR-27a; mmu-miR-183; mmu-miR-423-3p; mmu-miR-532-5p; mmu-miR-103; mmu-miR-376b; mmu-miR-468; mmu-miR-33; mmu-miR-672
ATP5SL	1.674	17	10.1553	mmu-miR-302d; mmu-miR-433; mmu-miR-335-5p; mmu-miR-136; mmu-miR-295; mmu-miR-340-5p; mmu-miR-18b; mmu-miR-296-5p; mmu-miR-377; mmu-miR-27a; mmu-miR-291a-3p; mmu-miR-1952; mmu-miR-142-5p; mmu-miR-1935; mmu-miR-292-5p; mmu-miR-302a; mmu-miR-294
ATP6AP1	4.012	33	8.22532	mmu-miR-29b; mmu-miR-130a; mmu-miR-130b; mmu-miR-291a-5p; mmu-miR-29c; mmu-miR-291b-5p; mmu-miR-669o-3p; mmu-miR-34a; mmu-miR-27a; mmu-miR-26b; mmu-miR-1952; mmu-miR-423-5p; mmu-miR-195; mmu-miR-669a-3p; mmu-miR-124; mmu-miR-297c; mmu-miR-350; mmu-miR-16; mmu-miR-760-5p; mmu-miR-1198-3p; mmu-miR-23b; mmu-miR-377; mmu-miR-34c; mmu-miR-29a; mmu-miR-134; mmu-miR-15a; mmu-miR-301a; mmu-miR-1224; mmu-…
ATP6AP2	1.368	20	14.6199	mmu-miR-148b; mmu-miR-1960; mmu-miR-495; mmu-miR-374; mmu-miR-1198-3p; mmu-miR-148a; mmu-miR-19a; mmu-miR-369-3p; mmu-miR-467f; mmu-miR-762; mmu-miR-101b; mmu-miR-323-3p; mmu-miR-152; mmu-miR-669f-3p; mmu-miR-27a; mmu-miR-376b; mmu-miR-129-2-3p; mmu-miR-154; mmu-miR-129-1-3p; mmu-miR-19b
ATP6V0A1	5.632	26	4.61648	mmu-let-7g; mmu-miR-142-3p; mmu-miR-433; mmu-miR-148b; mmu-miR-1960; mmu-miR-148a; mmu-miR-466g; mmu-miR-762; mmu-let-7c; mmu-miR-101b; mmu-miR-151-5p; mmu-miR-34c; mmu-miR-330; mmu-miR-152; mmu-miR-132; mmu-miR-760-3p; mmu-let-7a; mmu-miR-34a; mmu-miR-378; mmu-miR-1198-5p; mmu-miR-1983; mmu-let-7e; mmu-miR-103; mmu-miR-202-3p; mmu-miR-1952; mmu-miR-423-5p
ATP6V0A2	2.758	48	17.4039	mmu-miR-467e; mmu-miR-495; mmu-miR-804; mmu-miR-200b; mmu-miR-466g; mmu-miR-340-5p; mmu-miR-466b-3p; mmu-miR-28; mmu-miR-181a; mmu-miR-205; mmu-miR-669f-3p; mmu-miR-34a; mmu-miR-467h; mmu-miR-129-2-3p; mmu-miR-26b; mmu-miR-1952; mmu-miR-129-1-3p; mmu-miR-466a-3p; mmu-miR-142-3p; mmu-miR-124; mmu-miR-350; mmu-miR-429; mmu-miR-136; mmu-miR-125a-5p; mmu-miR-1198-3p; mmu-miR-484; mmu-miR-125b-5p; mmu…
ATP6V0B	2.386	19	7.96312	mmu-miR-350; mmu-miR-429; mmu-miR-713; mmu-miR-200b; mmu-miR-760-5p; mmu-miR-369-3p; mmu-miR-762; mmu-miR-291a-5p; mmu-miR-132; mmu-miR-291b-5p; mmu-miR-27a; mmu-miR-378; mmu-miR-183; mmu-miR-193b; mmu-miR-200c; mmu-miR-672; mmu-miR-1952; mmu-miR-421; mmu-miR-423-5p
ATP6V0C	3.34	15	4.49102	mmu-miR-34c; mmu-miR-433; mmu-miR-132; mmu-miR-134; mmu-miR-22; mmu-miR-34a; mmu-miR-183; mmu-miR-468; mmu-miR-484; mmu-miR-340-5p; mmu-miR-1952; mmu-miR-467f; mmu-miR-296-5p; mmu-miR-28; mmu-miR-423-5p
ATP6V0D1	0.951	19	19.979	mmu-miR-466a-3p; mmu-miR-148b; mmu-miR-350; mmu-miR-148a; mmu-miR-762; mmu-miR-30d; mmu-miR-30a; mmu-miR-152; mmu-miR-669o-5p; mmu-miR-22; mmu-miR-27a; mmu-miR-30b; mmu-miR-183; mmu-miR-468; mmu-miR-26b; mmu-miR-381; mmu-miR-1935; mmu-miR-26a; mmu-miR-423-5p
ATP6V0E	0.693	15	21.645	mmu-miR-152; mmu-miR-124; mmu-miR-148b; mmu-miR-1960; mmu-miR-335-3p; mmu-miR-669l; mmu-miR-335-5p; mmu-miR-429; mmu-miR-669a-5p; mmu-miR-200b; mmu-miR-148a; mmu-miR-669f-5p; mmu-miR-26b; mmu-miR-200c; mmu-miR-26a
ATP6V0E2	1.498	18	12.016	mmu-miR-96; mmu-miR-150; mmu-miR-762; mmu-miR-28; mmu-miR-330; mmu-miR-669o-5p; mmu-miR-155; mmu-miR-290-3p; mmu-miR-134; mmu-miR-543; mmu-miR-760-3p; mmu-miR-293; mmu-miR-27a; mmu-miR-467a; mmu-miR-421; mmu-miR-292-3p; mmu-miR-1952; mmu-miR-292-5p
ATP6V1A	6.096	70	11.4829	mmu-miR-495; mmu-miR-93; mmu-miR-431; mmu-miR-466g; mmu-miR-20a; mmu-miR-466b-3p; mmu-miR-323-3p; mmu-miR-29c; mmu-miR-290-3p; mmu-miR-669f-3p; mmu-let-7a; mmu-miR-468; mmu-miR-106a; mmu-miR-17; mmu-miR-381; mmu-miR-292-3p; mmu-miR-302a; mmu-miR-466a-3p; mmu-miR-302d; mmu-let-7g; mmu-miR-195; mmu-miR-433; mmu-miR-125a-5p; mmu-miR-1198-3p; mmu-miR-20b; mmu-miR-295; mmu-miR-125b-5p; mmu-miR-23b; mm…
ATP6V1B2	1.282	30	23.4009	mmu-let-7g; mmu-miR-195; mmu-miR-200a; mmu-miR-145; mmu-miR-350; mmu-miR-335-5p; mmu-miR-130a; mmu-miR-16; mmu-miR-760-5p; mmu-miR-19a; mmu-miR-130b; mmu-miR-23b; mmu-let-7c; mmu-miR-323-3p; mmu-miR-141; mmu-miR-335-3p; mmu-miR-134; mmu-let-7a; mmu-miR-543; mmu-miR-15a; mmu-miR-301a; mmu-miR-541; mmu-let-7e; mmu-miR-376b; mmu-miR-1952; mmu-miR-672; mmu-miR-1935; mmu-miR-23a; mmu-miR-15b; mmu-miR-…
ATP6V1C1	0.832	19	22.8365	mmu-miR-195; mmu-miR-1960; mmu-miR-96; mmu-miR-16; mmu-miR-466g; mmu-miR-669d; mmu-miR-340-5p; mmu-miR-30d; mmu-miR-30a; mmu-miR-28; mmu-miR-377; mmu-miR-335-3p; mmu-miR-15a; mmu-miR-1198-5p; mmu-miR-30b; mmu-miR-182; mmu-miR-329; mmu-miR-421; mmu-miR-15b
ATP6V1D	0.622	10	16.0772	mmu-miR-27a; mmu-miR-19a; mmu-miR-376b; mmu-miR-484; mmu-miR-674; mmu-miR-329; mmu-miR-23b; mmu-miR-23a; mmu-miR-292-5p; mmu-miR-19b
ATP6V1E1	0.52	8	15.3846	mmu-miR-103; mmu-miR-142-3p; mmu-miR-674; mmu-miR-23b; mmu-miR-804; mmu-miR-762; mmu-miR-23a; mmu-miR-466g
ATP6V1F	0.892	5	5.60538	mmu-miR-541; mmu-miR-34c; mmu-miR-34a; mmu-miR-762; mmu-miR-423-5p
ATP6V1G1	0.806	11	13.6476	mmu-miR-155; mmu-miR-205; mmu-miR-335-3p; mmu-miR-22; mmu-miR-872; mmu-miR-532-5p; mmu-miR-376b; mmu-miR-154; mmu-miR-292-5p; mmu-miR-487b; mmu-miR-377
ATP6V1H	0.445	12	26.9663	mmu-miR-195; mmu-miR-291b-3p; mmu-miR-669o-5p; mmu-miR-132; mmu-miR-15a; mmu-miR-16; mmu-miR-1983; mmu-miR-150; mmu-miR-381; mmu-miR-672; mmu-miR-467f; mmu-miR-15b
ATP7A	7.638	70	9.1647	mmu-miR-145; mmu-miR-495; mmu-miR-96; mmu-miR-467c; mmu-miR-340-5p; mmu-miR-466b-3p; mmu-miR-30d; mmu-miR-30a; mmu-miR-434-3p; mmu-miR-21; mmu-miR-29c; mmu-miR-290-3p; mmu-miR-669f-3p; mmu-miR-367; mmu-miR-381; mmu-miR-292-3p; mmu-miR-302a; mmu-miR-466a-3p; mmu-miR-302d; mmu-miR-195; mmu-miR-124; mmu-miR-148b; mmu-miR-136; mmu-miR-125a-5p; mmu-miR-1198-3p; mmu-miR-148a; mmu-miR-295; mmu-miR-125b-…
ATP7B	2.14	48	22.4299	mmu-miR-200a; mmu-miR-145; mmu-miR-335-5p; mmu-miR-713; mmu-miR-804; mmu-miR-466g; mmu-miR-19a; mmu-miR-150; mmu-miR-674; mmu-miR-340-5p; mmu-miR-467f; mmu-miR-434-3p; mmu-miR-181a; mmu-miR-669f-3p; mmu-let-7a; mmu-miR-541; mmu-miR-103; mmu-miR-202-3p; mmu-miR-154; mmu-miR-1952; mmu-miR-381; mmu-miR-19b; mmu-let-7g; mmu-miR-195; mmu-miR-124; mmu-miR-1960; mmu-miR-350; mmu-miR-125a-5p; mmu-miR-16;…
ATP8A1	18.032	83	4.60293	mmu-miR-145; mmu-miR-495; mmu-miR-335-5p; mmu-miR-713; mmu-miR-96; mmu-miR-466g; mmu-miR-340-5p; mmu-miR-30d; mmu-miR-28; mmu-miR-30a; mmu-miR-21; mmu-miR-155; mmu-miR-669f-3p; mmu-miR-1893; mmu-miR-191; mmu-miR-154; mmu-miR-381; mmu-miR-672; mmu-miR-669a-3p; mmu-miR-195; mmu-miR-433; mmu-miR-124; mmu-miR-148b; mmu-miR-669l; mmu-miR-148a; mmu-miR-669f-5p; mmu-miR-23b; mmu-miR-377; mmu-miR-34c; mm…
ATP8B1	2.697	40	14.8313	mmu-miR-335-5p; mmu-miR-200b; mmu-miR-431; mmu-miR-674; mmu-miR-467f; mmu-miR-340-5p; mmu-miR-30d; mmu-miR-30a; mmu-miR-323-3p; mmu-miR-181a; mmu-miR-669f-3p; mmu-miR-367; mmu-miR-27a; mmu-miR-30b; mmu-miR-154; mmu-miR-421; mmu-miR-1952; mmu-miR-466a-3p; mmu-miR-32; mmu-miR-433; mmu-miR-142-3p; mmu-miR-297c; mmu-miR-669l; mmu-miR-429; mmu-miR-1198-3p; mmu-miR-669f-5p; mmu-miR-363-3p; mmu-miR-23b;…
ATP8B2	20.857	59	2.82879	mmu-miR-145; mmu-miR-29b; mmu-miR-335-5p; mmu-miR-96; mmu-miR-431; mmu-miR-150; mmu-miR-369-3p; mmu-miR-340-5p; mmu-miR-467f; mmu-miR-296-5p; mmu-miR-30d; mmu-miR-30a; mmu-miR-434-3p; mmu-miR-181a; mmu-miR-29c; mmu-miR-27a; mmu-miR-1198-5p; mmu-miR-30b; mmu-miR-103; mmu-miR-182; mmu-miR-1983; mmu-miR-468; mmu-miR-129-2-3p; mmu-miR-154; mmu-miR-1952; mmu-miR-421; mmu-miR-672; mmu-miR-129-1-3p; mmu…
ATP8B3	0.878	18	20.5011	mmu-miR-429; mmu-miR-713; mmu-miR-136; mmu-miR-200b; mmu-miR-150; mmu-miR-762; mmu-miR-760-3p; mmu-miR-134; mmu-miR-27a; mmu-miR-532-5p; mmu-miR-541; mmu-miR-468; mmu-miR-129-2-3p; mmu-miR-200c; mmu-miR-33; mmu-miR-672; mmu-miR-129-1-3p; mmu-miR-466f
ATP8B5	6.381	55	8.61934	mmu-miR-200a; mmu-miR-145; mmu-miR-29b; mmu-miR-335-5p; mmu-miR-96; mmu-miR-431; mmu-miR-150; mmu-miR-296-5p; mmu-miR-30d; mmu-miR-466b-3p; mmu-miR-30a; mmu-miR-434-3p; mmu-miR-181a; mmu-miR-29c; mmu-miR-205; mmu-let-7a; mmu-miR-27a; mmu-miR-1198-5p; mmu-miR-30b; mmu-miR-182; mmu-miR-103; mmu-miR-1983; mmu-miR-202-3p; mmu-miR-1952; mmu-miR-672; mmu-let-7g; mmu-miR-433; mmu-miR-350; mmu-miR-124; m…
ATP9B	2.007	34	16.9407	mmu-miR-130a; mmu-miR-466g; mmu-miR-19a; mmu-miR-130b; mmu-miR-30d; mmu-miR-291a-5p; mmu-miR-30a; mmu-miR-181a; mmu-miR-669f-3p; mmu-miR-291b-5p; mmu-miR-30b; mmu-miR-191; mmu-miR-26b; mmu-miR-381; mmu-miR-423-5p; mmu-miR-19b; mmu-miR-148b; mmu-miR-1960; mmu-miR-760-5p; mmu-miR-148a; mmu-miR-669d; mmu-miR-484; mmu-miR-762; mmu-miR-152; mmu-miR-330; mmu-miR-760-3p; mmu-miR-293; mmu-miR-22; mmu-miR…
ATPAF1	8.85	41	4.63277	mmu-miR-200a; mmu-miR-335-5p; mmu-miR-713; mmu-miR-466g; mmu-miR-674; mmu-miR-340-5p; mmu-miR-466b-3p; mmu-miR-30d; mmu-miR-28; mmu-miR-30a; mmu-miR-434-3p; mmu-miR-181a; mmu-miR-21; mmu-miR-543; mmu-let-7a; mmu-miR-132; mmu-miR-27a; mmu-miR-30b; mmu-miR-541; mmu-miR-202-3p; mmu-miR-26b; mmu-miR-421; mmu-let-7g; mmu-miR-466a-3p; mmu-miR-142-3p; mmu-miR-124; mmu-miR-125a-5p; mmu-miR-669d; mmu-miR-…
ATPAF2	4.488	29	6.46168	mmu-miR-195; mmu-miR-148b; mmu-miR-1960; mmu-miR-335-5p; mmu-miR-136; mmu-miR-16; mmu-miR-148a; mmu-miR-466g; mmu-miR-760-5p; mmu-miR-19a; mmu-miR-674; mmu-miR-296-5p; mmu-miR-28; mmu-miR-330; mmu-miR-152; mmu-miR-760-3p; mmu-miR-22; mmu-miR-27a; mmu-miR-15a; mmu-miR-1198-5p; mmu-miR-541; mmu-miR-376b; mmu-miR-129-2-3p; mmu-miR-329; mmu-miR-672; mmu-miR-129-1-3p; mmu-miR-15b; mmu-miR-292-5p; mmu-…
ATPBD4	8.949	60	6.70466	mmu-miR-200a; mmu-miR-145; mmu-miR-29b; mmu-miR-713; mmu-miR-804; mmu-miR-93; mmu-miR-150; mmu-miR-20a; mmu-miR-674; mmu-miR-369-3p; mmu-miR-467f; mmu-miR-291a-5p; mmu-miR-434-3p; mmu-miR-669o-5p; mmu-miR-29c; mmu-miR-669f-3p; mmu-miR-291b-5p; mmu-miR-669o-3p; mmu-miR-103; mmu-miR-106a; mmu-miR-468; mmu-miR-17; mmu-miR-129-2-3p; mmu-miR-1952; mmu-miR-381; mmu-miR-421; mmu-miR-129-1-3p; mmu-miR-30…
ATPIF1	0.821	4	4.87211	mmu-miR-669o-5p; mmu-miR-205; mmu-miR-1952; mmu-miR-466g
ATR	0.194	11	56.701	mmu-let-7g; mmu-miR-466c-3p; mmu-miR-205; mmu-miR-297c; mmu-miR-335-3p; mmu-let-7a; mmu-let-7e; mmu-miR-202-3p; mmu-miR-297a; mmu-miR-466b-3p; mmu-let-7c
ATRAID	1.568	15	9.56633	mmu-miR-32; mmu-miR-330; mmu-miR-145; mmu-miR-1960; mmu-miR-205; mmu-miR-132; mmu-miR-367; mmu-miR-543; mmu-miR-25; mmu-miR-669d; mmu-miR-182; mmu-miR-103; mmu-miR-363-3p; mmu-miR-369-3p; mmu-miR-674
ATRIP	9.369	43	4.5896	mmu-miR-200a; mmu-miR-145; mmu-miR-335-5p; mmu-miR-804; mmu-miR-19a; mmu-miR-27a; mmu-miR-1983; mmu-miR-468; mmu-miR-103; mmu-miR-421; mmu-miR-423-5p; mmu-miR-19b; mmu-miR-195; mmu-miR-142-3p; mmu-miR-124; mmu-miR-148b; mmu-miR-1960; mmu-miR-350; mmu-miR-669l; mmu-miR-125a-5p; mmu-miR-16; mmu-miR-760-5p; mmu-miR-148a; mmu-miR-669d; mmu-miR-669f-5p; mmu-miR-484; mmu-miR-125b-5p; mmu-miR-762; mmu-m…
ATRN	4.517	72	15.9398	mmu-miR-495; mmu-miR-335-5p; mmu-miR-804; mmu-miR-93; mmu-miR-467c; mmu-miR-20a; mmu-miR-323-3p; mmu-miR-21; mmu-miR-29c; mmu-miR-669f-3p; mmu-miR-468; mmu-miR-106a; mmu-miR-17; mmu-miR-129-2-3p; mmu-miR-154; mmu-miR-672; mmu-miR-381; mmu-miR-129-1-3p; mmu-miR-302a; mmu-miR-466a-3p; mmu-miR-302d; mmu-miR-148b; mmu-miR-136; mmu-miR-125a-5p; mmu-miR-148a; mmu-miR-20b; mmu-miR-295; mmu-miR-125b-5p; …
ATRNL1	2.246	53	23.5975	mmu-miR-200a; mmu-miR-145; mmu-miR-29b; mmu-miR-495; mmu-miR-804; mmu-miR-93; mmu-miR-200b; mmu-miR-150; mmu-miR-20a; mmu-miR-340-5p; mmu-miR-466b-3p; mmu-miR-291a-5p; mmu-miR-181a; mmu-miR-29c; mmu-miR-132; mmu-miR-291b-5p; mmu-miR-669f-3p; mmu-miR-367; mmu-miR-34a; mmu-miR-27a; mmu-miR-191; mmu-miR-541; mmu-miR-182; mmu-miR-103; mmu-miR-106a; mmu-miR-17; mmu-miR-672; mmu-miR-466a-3p; mmu-miR-32…
ATRX	14.125	96	6.79646	mmu-miR-145; mmu-miR-495; mmu-miR-335-5p; mmu-miR-713; mmu-miR-96; mmu-miR-431; mmu-miR-466g; mmu-miR-19a; mmu-miR-340-5p; mmu-miR-28; mmu-miR-323-3p; mmu-miR-434-3p; mmu-miR-29c; mmu-miR-155; mmu-miR-669f-3p; mmu-miR-367; mmu-miR-129-2-3p; mmu-miR-154; mmu-miR-381; mmu-miR-672; mmu-miR-129-1-3p; mmu-miR-669a-3p; mmu-miR-466a-3p; mmu-miR-195; mmu-miR-433; mmu-miR-124; mmu-miR-148b; mmu-miR-136; m…
ATXN1	24.09	108	4.48319	mmu-miR-145; mmu-miR-495; mmu-miR-335-5p; mmu-miR-713; mmu-miR-93; mmu-miR-96; mmu-miR-431; mmu-miR-466g; mmu-miR-19a; mmu-miR-467c; mmu-miR-20a; mmu-miR-340-5p; mmu-miR-30d; mmu-miR-28; mmu-miR-30a; mmu-miR-290-3p; mmu-miR-29c; mmu-let-7a; mmu-miR-367; mmu-miR-669f-3p; mmu-miR-541; mmu-miR-106a; mmu-miR-17; mmu-miR-202-3p; mmu-miR-292-3p; mmu-miR-381; mmu-miR-302a; mmu-miR-302d; mmu-let-7g; mmu-…
[truncated: 10,077 more rows]
