# Supplementary material for: Extensive microRNA-mediated crosstalk between lncRNAs and mRNAs in mouse embryonic stem cells
Source: HighWire-hosted journal article supplement (doi:10.1101/gr.181974.114), 2015-03-19
Supplement: Supplemental_TableS9.xlsx [file Supplemental_TableS9.xlsx]

## Sheet: ESexpressed_bg
Supplementary table S9. Significantly enriched ceRNAt GO annotations
	Category	Term	Fold Enrichment	Benjamini Hochberg corrected p value
	GO:0032502	developmental process	1.4	8.2e-11
	GO:0032501	multicellular organismal process	1.3	1.1e-08
	GO:0048519	negative regulation of biological process	1.5	3.7e-06
	GO:0001763	morphogenesis of a branching structure	2.8	1.2e-05
	GO:0051239	regulation of multicellular organismal process	1.6	0.00013
	GO:0051301	cell division	1.9	0.00097
	GO:0042127	regulation of cell proliferation	1.6	0.0021
	GO:0016055	Wnt receptor signaling pathway	2.3	0.0022
	GO:0048518	positive regulation of biological process	1.3	0.0022
	GO:0016043	cellular component organization	1.3	0.0035
	GO:0000279	M phase	1.8	0.0066
	GO:0022402	cell cycle process	1.6	0.008
	GO:0007498	mesoderm development	2.9	0.0081
	GO:0006259	DNA metabolic process	1.6	0.008
	GO:0016265	death	1.5	0.014
	GO:0006260	DNA replication	2	0.022
	GO:0006915	apoptosis	1.5	0.029
	GO:0007049	cell cycle	1.4	0.029
	GO:0016477	cell migration	1.7	0.033
	GO:0006928	cell motion	1.6	0.033
	GO:0065007	biological regulation	1.1	0.04
	GO:0010628	positive regulation of gene expression	1.5	0.045
	GO:0009892	negative regulation of metabolic process	1.4	0.047
