# Supplementary material for: Extensive microRNA-mediated crosstalk between lncRNAs and mRNAs in mouse embryonic stem cells
Source: HighWire-hosted journal article supplement (doi:10.1101/gr.181974.114), 2015-03-19
Supplement: Supplemental_TableS10.xlsx [file Supplemental_TableS10.xlsx]

## Sheet: Sheet1
Supplementary table S10. List of qRT-PCR primers used in the study.
Oligo Name	Sequence 5' to 3'
ES dicer knockout cells
Dicer_qPCR.f	CGATATTCGATCCTCCTGTGA
Dicer_qPCR.r	GCCAGCAAGCAGTCTTTTGT
GADPH_qpcr.f	TGTGTCCGTCGTGGATCTGA
GADPH_qpcr.r	CCTGCTTCACCACCTTCTTGA
18S_rRNA_fwd	GTAACCCGTTGAACCCCATT
18S_rRNA_.r	CCATCCAATCGGTAGTAGCG
miRNA markers
miR-302a	TAAGTGCTTCCATGTTTTGGTGA
miR-200a	TAACACTGTCTGGTAACGATGT
miR-290a-3p	AAAGTGCCGCCTAGTTTTAAGCCC
miR-124	TAAGGCACGCGGTGAATGCC
miR-16	TAGCAGCACGTAAATATTGGCG
siRNA oligos
si-linc1283_p1	AGATGTTTGGTGTGATAAATC
si-linc1283_p2	TGTATGGGAGTAAGAACTTAG
si-linc1582_p1	GGCAAAGCCACACCATATATC
si-linc1582_p2	AGAGGTCCAAAGCACGTAAAC
si-linc1582_p3	GAGACCAATTTCGATCAAATA
si-linc1405_p1	GCGACCTCAATACGGCGTTTA
ceRNAt qPCR primers
ADRA2A.f	AGCTGCAAGATCAACGACCA
ADRA2A.r	ACGCTTGGCGATCTGGTAAA
CCNO.f	AATACGGCCAGAGCTGCTAC
CCNO.r	GATTCGGCAGTCACTTGTGG
CD44.f	AGAAGAGCACCCCAGAAAGC
CD44.r	CACAGTTGAGGCAATGGTGG
EGR2.f	CAGACTCAGCCTGAACTGGAC
EGR2.r	AGAATGCTGAAGGATCCTGGT
HMGA2.f	CCTGCTCAGGAGACTGAAGAGA
HMGA2.r	GCAGTGTCTTCTCCCTTCAAAAG
IFIH1.f	GATGTTCTGCGCCAAACTGG
IFIH1.r	ACGAGTTAGCCAAGTCTGTGTT
LEF1.f	CAGCGCGAGACAATTATGGC
LEF1.r	TCTGGGACCTGTACCTGAAGT
PRRX1.f	GGAAGACACTGAAAAGCGCC
PRRX1.r	TCTCAGGTTGGCAATGCTGT
STAT1.f	CCTGCGTGCAGTGATCGTTT
STAT1.r	GGTTCGGGATTCAACACAAGC
PTPRB.f	AGTGGTACCCAGAAGTGCCC
PTPRB.r	CTCCAGTCTGCACGACGCT
CYCS.f	AATCTCCACGGTCTGTTCGG
CYCS.r	CCCCAGGTGATGCCTTTGTT
ENPP1.f	ATGGACCTAGGAGAGGAGCC
ENPP1.r	CTGACAAAACCAGCGACAGC
FAM13B.f	CAGGATAATGGCGGGACTTCT
FAM13B.r	AGAAAGTTCATTAACCTGCTCAGT
NCL.f	TACTGCAGTCGCTTTCGTGT
NCL.r	GTGGGTTTTGCCAGCCTTTG
NUB1.f	GAATGAAAACAAACGGCGGC
NUB1rv	GCCATCCTTGAAAGTAAAACTGCG
SEPSECS.f	CATCTCATTCAGCAGGGGGC
SEPSECS.r	GCACCACCTACTGGAACCAT
SPRY4.f	GACTTCAACGGCGACTGACC
SPRY4.r	GGCTTCTAGGGGTCTTTGAGG
TMEM44.f	GCCCACACGCTGATTCTCTA
TMEM44.r	CGGTGTCACACAGACTCGTT
SENP5.f	AGCAAAGAACGTAGGTACATCCA
SENP5.r	ACCCAGCATTCCATTTCTCAG
RNF41.f	TGAGATCCTCGAGTGGGTGA
RNF41.r	CTTGATGACAGCCTGGAGCA
MAPK14.f	AACAGCATGCACAGGGAAGT
MAPK14.r	GCTTTAACGGTTCTTGGGGC
HNRPDL.f	GGTCAGCAGAGCACTTACGG
HNRPDL.r	TGGTTTCTTTACACCTCCTGCT
ZEB2.f	CCCAGGAGGAAAAACGTGGT
ZEB2.r	GTCCTGGTCCAGAGGGTTTG
CAST.f	CGTTCTCGAGAGGTTCCCAG
CAST.r	TAACATGCGTCTTGTACCACCA
ELK4.f	TTGAGGTCCGAGTGTGAGGA
ELK4.r	ATAGCAATGGGCAGGCAGG
USP22.f	ACCAACTAAACGGGAGCTGG
USP22.r	CAGTCCACGCAGACCTATGG
HMGN1.f	CGCAGCAGTTCGTGTGG
HMGN1.r	CGCTAACCTTCCTCTTGGGC
