# Supplementary material for: Extensive microRNA-mediated crosstalk between lncRNAs and mRNAs in mouse embryonic stem cells
Source: HighWire-hosted journal article supplement (doi:10.1101/gr.181974.114), 2015-03-19
Supplement: SuppTableS8_revised.xlsx [file SuppTableS8_revised.xlsx]

## Sheet: lnceRNAs
Supplementary table S8. Density of MREs predicted within lnceRNAs and 3' UTRs of protein-coding ceRNAt transcripts for the top 25% most highly expressed miRNAs in mESCs.
lncRNA	Length (kb)	Number of MREs	MRE density (sites/kb)	ESC miRNAs
linc1230	0.464	8	17.2414	mmu-miR-484; mmu-miR-103; mmu-miR-335-3p; mmu-miR-145; mmu-miR-760-3p; mmu-miR-369-3p; mmu-miR-741
linc1235	0.106	2	18.8679	mmu-miR-205; mmu-miR-713
linc1239	2.976	83	27.8898	mmu-miR-495; mmu-miR-29b; mmu-miR-93; mmu-miR-804; mmu-miR-335-5p; mmu-miR-96; mmu-miR-130a; mmu-miR-19a; mmu-miR-130b; mmu-miR-20a; mmu-miR-291a-5p; mmu-miR-323-3p; mmu-miR-434-3p; mmu-miR-29c; mmu-miR-205; mmu-miR-291b-5p; mmu-miR-132; mmu-miR-669o-3p; mmu-miR-34a; mmu-miR-27a; mmu-miR-468; mmu-miR-182; mmu-miR-106a; mmu-miR-17; mmu-miR-202-3p; mmu-miR-19b; mmu-miR-669a-3p; mmu-miR-195; mmu-miR…
linc1245	1.533	16	10.4371	mmu-miR-330; mmu-miR-1945; mmu-miR-804; mmu-miR-335-5p; mmu-miR-96; mmu-miR-466g; mmu-miR-484; mmu-miR-672; mmu-miR-142-5p; mmu-miR-340-5p; mmu-miR-762; mmu-miR-1935; mmu-miR-741; mmu-miR-377
linc1256	5.094	116	22.7719	mmu-miR-495; mmu-miR-145; mmu-miR-713; mmu-miR-335-5p; mmu-miR-96; mmu-miR-340-5p; mmu-miR-466b-3p; mmu-miR-30d; mmu-miR-30a; mmu-miR-434-3p; mmu-miR-21; mmu-miR-29c; mmu-miR-669f-3p; mmu-let-7a; mmu-miR-541; mmu-miR-202-3p; mmu-miR-672; mmu-miR-381; mmu-miR-466a-3p; mmu-let-7g; mmu-miR-195; mmu-miR-433; mmu-miR-148b; mmu-miR-669l; mmu-miR-136; mmu-miR-1198-3p; mmu-miR-148a; mmu-miR-669f-5p; mmu-…
linc1267	0.494	4	8.09717	mmu-miR-330; mmu-miR-350; mmu-miR-335-3p; mmu-miR-741
linc1270	1.332	18	13.5135	mmu-miR-200a; mmu-miR-804; mmu-miR-429; mmu-miR-200b; mmu-miR-1198-3p; mmu-miR-369-3p; mmu-miR-340-5p; mmu-miR-141; mmu-miR-181a; mmu-miR-205; mmu-miR-335-3p; mmu-miR-760-3p; mmu-miR-193b; mmu-miR-1983; mmu-miR-1224; mmu-miR-200c; mmu-miR-1952
linc1281	1.469	42	28.5909	mmu-miR-145; mmu-miR-130a; mmu-miR-200b; mmu-miR-466g; mmu-miR-19a; mmu-miR-130b; mmu-miR-369-3p; mmu-miR-467f; mmu-miR-434-3p; mmu-miR-669o-5p; mmu-miR-205; mmu-let-7a; mmu-miR-27a; mmu-miR-541; mmu-miR-202-3p; mmu-miR-19b; mmu-let-7g; mmu-miR-466a-3p; mmu-miR-148b; mmu-miR-669l; mmu-miR-429; mmu-miR-374; mmu-miR-148a; mmu-miR-669d; mmu-miR-669f-5p; mmu-miR-484; mmu-let-7c; mmu-miR-152; mmu-miR-…
linc1282	0.764	10	13.089	mmu-miR-669a-3p; mmu-miR-434-3p; mmu-miR-205; mmu-miR-669o-3p; mmu-miR-335-5p; mmu-miR-150; mmu-miR-674; mmu-miR-467f; mmu-miR-292-5p
linc1283	3.383	57	16.849	mmu-miR-495; mmu-miR-93; mmu-miR-804; mmu-miR-335-5p; mmu-miR-431; mmu-miR-150; mmu-miR-369-3p; mmu-miR-20a; mmu-miR-340-5p; mmu-miR-323-3p; mmu-miR-28; mmu-miR-21; mmu-miR-181a; mmu-miR-205; mmu-miR-543; mmu-let-7a; mmu-miR-132; mmu-miR-669o-3p; mmu-miR-27a; mmu-miR-1198-5p; mmu-miR-106a; mmu-miR-103; mmu-miR-17; mmu-miR-672; mmu-miR-669a-3p; mmu-miR-466a-3p; mmu-let-7g; mmu-miR-148b; mmu-miR-19…
linc1296	0.807	22	27.2615	mmu-miR-669a-3p; mmu-let-7g; mmu-miR-495; mmu-miR-29b; mmu-miR-145; mmu-miR-669l; mmu-miR-374; mmu-miR-669f-5p; mmu-miR-674; mmu-miR-369-3p; mmu-miR-340-5p; mmu-let-7c; mmu-miR-434-3p; mmu-miR-29a; mmu-miR-29c; mmu-miR-760-3p; mmu-let-7a; mmu-miR-669o-3p; mmu-miR-669a-5p; mmu-miR-103; mmu-let-7e; mmu-miR-423-5p
linc1307	1.097	36	32.8168	mmu-miR-302d; mmu-miR-195; mmu-miR-1960; mmu-miR-148b; mmu-miR-429; mmu-miR-200b; mmu-miR-16; mmu-miR-148a; mmu-miR-295; mmu-miR-762; mmu-miR-296-5p; mmu-miR-1196; mmu-miR-330; mmu-miR-152; mmu-miR-21; mmu-miR-335-3p; mmu-miR-205; mmu-miR-760-3p; mmu-miR-15a; mmu-miR-532-5p; mmu-miR-129-2-3p; mmu-miR-291a-3p; mmu-miR-200c; mmu-miR-129-1-3p; mmu-miR-302a; mmu-miR-15b; mmu-miR-466f; mmu-miR-423-5p;…
linc1312	0.258	8	31.0078	mmu-miR-433; mmu-miR-760-3p; mmu-miR-27a; mmu-miR-1983; mmu-miR-202-3p; mmu-miR-142-5p; mmu-miR-340-5p; mmu-miR-467f
linc1315	0.818	17	20.7824	mmu-let-7g; mmu-miR-495; mmu-miR-350; mmu-miR-125a-5p; mmu-miR-760-5p; mmu-miR-125b-5p; mmu-let-7c; mmu-miR-741; mmu-miR-330; mmu-let-7a; mmu-miR-132; mmu-miR-134; mmu-miR-760-3p; mmu-let-7e; mmu-miR-1983; mmu-miR-421; mmu-miR-1935
linc1316	2.457	50	20.35	mmu-miR-804; mmu-miR-335-5p; mmu-miR-200b; mmu-miR-467c; mmu-miR-291a-5p; mmu-miR-28; mmu-miR-181a; mmu-miR-205; mmu-miR-291b-5p; mmu-miR-34a; mmu-miR-27a; mmu-miR-103; mmu-miR-1983; mmu-miR-129-2-3p; mmu-miR-672; mmu-miR-381; mmu-miR-1952; mmu-miR-129-1-3p; mmu-miR-669l; mmu-miR-429; mmu-miR-136; mmu-miR-125a-5p; mmu-miR-760-5p; mmu-miR-669f-5p; mmu-miR-484; mmu-miR-125b-5p; mmu-miR-18b; mmu-miR…
linc1335	0.25	2	8	mmu-miR-433; mmu-miR-1952
linc1347	3.446	80	23.2153	mmu-miR-495; mmu-miR-467e; mmu-miR-29b; mmu-miR-145; mmu-miR-713; mmu-miR-335-5p; mmu-miR-96; mmu-miR-467c; mmu-miR-150; mmu-miR-674; mmu-miR-369-3p; mmu-miR-340-5p; mmu-miR-30d; mmu-miR-30a; mmu-miR-28; mmu-miR-669o-5p; mmu-miR-29c; mmu-miR-290-3p; mmu-miR-205; mmu-miR-132; mmu-miR-669o-3p; mmu-miR-467a; mmu-miR-27a; mmu-miR-30b; mmu-miR-191; mmu-miR-467h; mmu-miR-103; mmu-miR-1983; mmu-miR-129-…
linc1354	1.572	33	20.9924	mmu-miR-302d; mmu-miR-495; mmu-miR-467e; mmu-miR-350; mmu-miR-29b; mmu-miR-467c; mmu-miR-19a; mmu-miR-150; mmu-miR-295; mmu-miR-466b-3p; mmu-miR-377; mmu-miR-466c-3p; mmu-miR-434-3p; mmu-miR-291b-3p; mmu-miR-335-3p; mmu-miR-290-3p; mmu-miR-29a; mmu-miR-29c; mmu-miR-543; mmu-miR-1893; mmu-miR-467a; mmu-miR-467h; mmu-miR-423-3p; mmu-miR-291a-3p; mmu-miR-1224; mmu-miR-142-5p; mmu-miR-292-3p; mmu-miR…
linc1356	0.469	6	12.7932	mmu-miR-34c; mmu-miR-145; mmu-miR-34a; mmu-miR-125b-5p; mmu-miR-27a; mmu-miR-125a-5p
linc1366	1.21	30	24.7934	mmu-miR-29b; mmu-miR-145; mmu-miR-124; mmu-miR-760-5p; mmu-miR-466g; mmu-miR-431; mmu-miR-484; mmu-miR-150; mmu-miR-23b; mmu-miR-762; mmu-miR-296-5p; mmu-miR-291a-5p; mmu-miR-34c; mmu-miR-330; mmu-miR-29a; mmu-miR-29c; mmu-miR-335-3p; mmu-miR-760-3p; mmu-miR-132; mmu-miR-291b-5p; mmu-miR-34a; mmu-miR-183; mmu-miR-1224; mmu-miR-23a; mmu-miR-292-5p
linc1385	3.188	88	27.6035	mmu-miR-495; mmu-miR-29b; mmu-miR-145; mmu-miR-96; mmu-miR-200b; mmu-miR-466g; mmu-miR-431; mmu-miR-369-3p; mmu-miR-467f; mmu-miR-340-5p; mmu-miR-466b-3p; mmu-miR-30d; mmu-miR-30a; mmu-miR-21; mmu-miR-181a; mmu-miR-29c; mmu-miR-155; mmu-miR-669f-3p; mmu-miR-543; mmu-let-7a; mmu-miR-132; mmu-miR-669o-3p; mmu-miR-27a; mmu-miR-30b; mmu-miR-1198-5p; mmu-miR-182; mmu-miR-381; mmu-miR-1952; mmu-miR-669…
linc1390	0.629	13	20.6677	mmu-miR-466c-3p; mmu-miR-466a-3p; mmu-miR-195; mmu-miR-205; mmu-miR-669f-3p; mmu-miR-15a; mmu-miR-136; mmu-miR-16; mmu-miR-467f; mmu-miR-381; mmu-miR-466b-3p; mmu-miR-15b
linc1391	0.4	10	25	mmu-miR-205; mmu-miR-293; mmu-miR-136; mmu-miR-484; mmu-miR-129-2-3p; mmu-miR-720; mmu-miR-762; mmu-miR-129-1-3p; mmu-miR-466f
linc1393	1.525	35	22.9508	mmu-miR-200a; mmu-miR-467e; mmu-miR-669l; mmu-miR-429; mmu-miR-872; mmu-miR-200b; mmu-miR-19a; mmu-miR-669f-5p; mmu-miR-150; mmu-miR-674; mmu-miR-340-5p; mmu-miR-762; mmu-miR-741; mmu-miR-323-3p; mmu-miR-141; mmu-miR-669o-5p; mmu-miR-669a-5p; mmu-miR-22; mmu-miR-1198-5p; mmu-miR-532-5p; mmu-miR-467h; mmu-miR-183; mmu-miR-129-2-3p; mmu-miR-200c; mmu-miR-26b; mmu-miR-672; mmu-miR-129-1-3p; mmu-miR-…
linc1405	5.419	120	22.1443	mmu-miR-145; mmu-miR-335-5p; mmu-miR-466g; mmu-miR-431; mmu-miR-340-5p; mmu-miR-466b-3p; mmu-miR-30d; mmu-miR-323-3p; mmu-miR-30a; mmu-miR-434-3p; mmu-miR-29c; mmu-miR-669f-3p; mmu-miR-541; mmu-miR-468; mmu-miR-129-2-3p; mmu-miR-381; mmu-miR-154; mmu-miR-129-1-3p; mmu-miR-302a; mmu-miR-466a-3p; mmu-miR-302d; mmu-miR-195; mmu-miR-136; mmu-miR-125a-5p; mmu-miR-760-5p; mmu-miR-1198-3p; mmu-miR-295; …
linc1410	1.806	25	13.8427	mmu-miR-669a-3p; mmu-miR-433; mmu-miR-142-3p; mmu-miR-350; mmu-miR-1960; mmu-miR-429; mmu-miR-200b; mmu-miR-431; mmu-miR-340-5p; mmu-miR-101b; mmu-miR-181a; mmu-miR-21; mmu-miR-330; mmu-miR-543; mmu-miR-669o-3p; mmu-miR-376a; mmu-miR-382; mmu-miR-200c; mmu-miR-142-5p; mmu-miR-33; mmu-miR-381
linc1413	0.748	27	36.0963	mmu-miR-302d; mmu-miR-195; mmu-miR-350; mmu-miR-16; mmu-miR-466g; mmu-miR-467c; mmu-miR-150; mmu-miR-295; mmu-miR-762; mmu-miR-741; mmu-miR-291b-3p; mmu-miR-669o-5p; mmu-miR-290-3p; mmu-miR-335-3p; mmu-miR-15a; mmu-miR-467a; mmu-miR-291a-3p; mmu-miR-672; mmu-miR-292-3p; mmu-miR-15b; mmu-miR-302a; mmu-miR-294
linc1427	1.56	35	22.4359	mmu-miR-302d; mmu-miR-195; mmu-miR-200a; mmu-miR-1960; mmu-miR-148b; mmu-miR-335-5p; mmu-miR-16; mmu-miR-760-5p; mmu-miR-148a; mmu-miR-295; mmu-miR-434-3p; mmu-miR-141; mmu-miR-669o-5p; mmu-miR-330; mmu-miR-152; mmu-miR-181a; mmu-miR-205; mmu-miR-760-3p; mmu-miR-543; mmu-miR-132; mmu-miR-378; mmu-miR-15a; mmu-miR-468; mmu-miR-291a-3p; mmu-miR-129-2-3p; mmu-miR-1224; mmu-miR-129-1-3p; mmu-miR-302a…
linc1448	0.468	2	4.2735	mmu-miR-495; mmu-miR-804
linc1454	0.687	3	4.36681	mmu-miR-484; mmu-miR-376b; mmu-miR-335-3p
linc1457	0.066	2	30.303	mmu-miR-125b-5p; mmu-miR-125a-5p
linc1463	1.547	29	18.746	mmu-miR-495; mmu-miR-669l; mmu-miR-804; mmu-miR-669f-5p; mmu-miR-18b; mmu-miR-466b-3p; mmu-miR-291a-5p; mmu-miR-377; mmu-miR-101b; mmu-miR-466c-3p; mmu-miR-290-3p; mmu-miR-134; mmu-miR-291b-5p; mmu-miR-669a-5p; mmu-miR-27a; mmu-miR-467a; mmu-miR-532-5p; mmu-miR-183; mmu-miR-468; mmu-miR-103; mmu-miR-376b; mmu-miR-1224; mmu-miR-1952; mmu-miR-292-3p; mmu-miR-421
linc1470	1.285	52	40.4669	mmu-miR-29b; mmu-miR-93; mmu-miR-335-5p; mmu-miR-466g; mmu-miR-20a; mmu-miR-669o-5p; mmu-miR-29c; mmu-let-7a; mmu-miR-34a; mmu-miR-1983; mmu-miR-106a; mmu-miR-129-2-3p; mmu-miR-17; mmu-miR-202-3p; mmu-miR-129-1-3p; mmu-miR-423-5p; mmu-let-7g; mmu-miR-195; mmu-miR-669l; mmu-miR-125a-5p; mmu-miR-16; mmu-miR-760-5p; mmu-miR-669f-5p; mmu-miR-20b; mmu-miR-125b-5p; mmu-miR-762; mmu-let-7c; mmu-miR-151-…
linc1471	1.294	30	23.1839	mmu-let-7g; mmu-miR-495; mmu-miR-1960; mmu-miR-148b; mmu-miR-93; mmu-miR-148a; mmu-miR-19a; mmu-miR-20b; mmu-miR-20a; mmu-miR-762; mmu-let-7c; mmu-miR-741; mmu-miR-101b; mmu-miR-1196; mmu-miR-152; mmu-miR-669f-3p; mmu-miR-543; mmu-let-7a; mmu-miR-134; mmu-miR-106b; mmu-miR-376b; mmu-miR-106a; mmu-let-7e; mmu-miR-17; mmu-miR-26b; mmu-miR-421; mmu-miR-381; mmu-miR-154; mmu-miR-26a; mmu-miR-19b
linc1483	1.125	28	24.8889	mmu-miR-669a-3p; mmu-miR-195; mmu-miR-433; mmu-miR-29b; mmu-miR-804; mmu-miR-713; mmu-miR-136; mmu-miR-16; mmu-miR-431; mmu-miR-674; mmu-miR-18b; mmu-miR-741; mmu-miR-151-5p; mmu-miR-29a; mmu-miR-29c; mmu-miR-669o-3p; mmu-miR-15a; mmu-miR-103; mmu-miR-376b; mmu-miR-1952; mmu-miR-1935; mmu-miR-15b
linc1503	1.571	24	15.2769	mmu-miR-195; mmu-miR-145; mmu-miR-713; mmu-miR-429; mmu-miR-136; mmu-miR-200b; mmu-miR-16; mmu-miR-760-5p; mmu-miR-19a; mmu-miR-484; mmu-miR-150; mmu-miR-762; mmu-miR-28; mmu-miR-330; mmu-miR-669f-3p; mmu-miR-15a; mmu-miR-27a; mmu-miR-532-5p; mmu-miR-376b; mmu-miR-200c; mmu-miR-1952; mmu-miR-15b; mmu-miR-19b
linc1505	0.446	9	20.1794	mmu-miR-32; mmu-miR-297c; mmu-miR-367; mmu-miR-378; mmu-miR-1198-5p; mmu-miR-25; mmu-miR-1983; mmu-miR-363-3p; mmu-miR-297a
linc1510	7.66	198	25.8486	mmu-miR-495; mmu-miR-145; mmu-miR-93; mmu-miR-713; mmu-miR-335-5p; mmu-miR-431; mmu-miR-20a; mmu-miR-340-5p; mmu-miR-466b-3p; mmu-miR-30d; mmu-miR-296-5p; mmu-miR-323-3p; mmu-miR-30a; mmu-miR-434-3p; mmu-miR-21; mmu-miR-29c; mmu-miR-155; mmu-miR-669f-3p; mmu-let-7a; mmu-miR-468; mmu-miR-106a; mmu-miR-17; mmu-miR-129-2-3p; mmu-miR-202-3p; mmu-miR-672; mmu-miR-381; mmu-miR-154; mmu-miR-129-1-3p; mm…
linc1524	0.35	5	14.2857	mmu-miR-195; mmu-miR-154; mmu-miR-15a; mmu-miR-16; mmu-miR-15b
linc1537	1.231	30	24.3704	mmu-miR-302d; mmu-let-7g; mmu-miR-1960; mmu-miR-804; mmu-miR-96; mmu-miR-130a; mmu-miR-760-5p; mmu-miR-130b; mmu-miR-295; mmu-miR-340-5p; mmu-miR-466b-3p; mmu-let-7c; mmu-miR-151-5p; mmu-miR-466c-3p; mmu-miR-330; mmu-miR-335-3p; mmu-miR-543; mmu-let-7a; mmu-miR-27a; mmu-miR-301a; mmu-miR-376b; mmu-miR-182; mmu-let-7e; mmu-miR-291a-3p; mmu-miR-202-3p; mmu-miR-142-5p; mmu-miR-302a; mmu-miR-294
linc1547	5.659	117	20.675	mmu-miR-495; mmu-miR-145; mmu-miR-93; mmu-miR-804; mmu-miR-335-5p; mmu-miR-96; mmu-miR-431; mmu-miR-19a; mmu-miR-20a; mmu-miR-323-3p; mmu-miR-28; mmu-miR-434-3p; mmu-miR-541; mmu-miR-106a; mmu-miR-17; mmu-miR-129-2-3p; mmu-miR-672; mmu-miR-129-1-3p; mmu-miR-466a-3p; mmu-miR-148b; mmu-miR-669l; mmu-miR-136; mmu-miR-125a-5p; mmu-miR-760-5p; mmu-miR-1198-3p; mmu-miR-148a; mmu-miR-669f-5p; mmu-miR-20…
linc1552	0.896	14	15.625	mmu-miR-669a-3p; mmu-miR-466c-3p; mmu-miR-29c; mmu-miR-29b; mmu-miR-29a; mmu-miR-205; mmu-miR-124; mmu-miR-669o-3p; mmu-miR-136; mmu-miR-374; mmu-miR-468; mmu-miR-466b-3p; mmu-miR-151-5p; mmu-miR-377
linc1555	0.449	5	11.1359	mmu-miR-467f; mmu-miR-381; mmu-miR-154; mmu-miR-762; mmu-miR-136
linc1557	1.038	21	20.2312	mmu-let-7g; mmu-miR-136; mmu-miR-130a; mmu-miR-466g; mmu-miR-19a; mmu-miR-130b; mmu-miR-466b-3p; mmu-miR-376c; mmu-let-7c; mmu-miR-466c-3p; mmu-miR-291b-3p; mmu-let-7a; mmu-miR-134; mmu-miR-27a; mmu-miR-301a; mmu-let-7e; mmu-miR-1935; mmu-miR-466f; mmu-miR-19b
linc1582	0.755	14	18.543	mmu-miR-291b-3p; mmu-miR-34c; mmu-miR-467e; mmu-miR-93; mmu-miR-34a; mmu-miR-382; mmu-miR-106b; mmu-miR-467h; mmu-miR-106a; mmu-miR-20b; mmu-miR-17; mmu-miR-674; mmu-miR-20a; mmu-miR-28
linc1611	0.157	6	38.2166	mmu-miR-195; mmu-miR-103; mmu-miR-33; mmu-miR-15a; mmu-miR-16; mmu-miR-15b
linc1615	0.215	4	18.6047	mmu-miR-669f-5p; mmu-miR-669l; mmu-miR-669a-5p; mmu-miR-423-5p
linc1617	0.189	1	5.29101	mmu-miR-292-5p
linc1621	0.255	1	3.92157	mmu-miR-1935
linc1623	0.255	1	3.92157	mmu-miR-421
linc1626	0.255	2	7.84314	mmu-miR-1983; mmu-miR-27a
linc1627	0.255	4	15.6863	mmu-miR-330; mmu-miR-543; mmu-miR-23b; mmu-miR-23a
linc1635	0.255	5	19.6078	mmu-miR-1983; mmu-miR-760-3p; mmu-miR-125b-5p; mmu-miR-1935; mmu-miR-125a-5p

## Sheet: ceRNAt
Protein-coding gene	Length (kb)	Number of MREs	MRE density (sites/kb)	ESC miRNAs
1600014C10Rik	2.593	27	10.4126	mmu-miR-466a-3p; mmu-let-7g; mmu-miR-495; mmu-miR-335-5p; mmu-miR-484; mmu-miR-762; mmu-miR-376c; mmu-let-7c; mmu-miR-377; mmu-miR-28; mmu-miR-1196; mmu-miR-330; mmu-miR-290-3p; mmu-miR-760-3p; mmu-let-7a; mmu-miR-132; mmu-miR-134; mmu-miR-467a; mmu-miR-27a; mmu-let-7e; mmu-miR-202-3p; mmu-miR-672; mmu-miR-292-3p
1600029D21Rik	0.937	14	14.9413	mmu-miR-291b-3p; mmu-miR-141; mmu-miR-200a; mmu-miR-335-3p; mmu-miR-205; mmu-miR-96; mmu-miR-872; mmu-miR-760-5p; mmu-miR-193b; mmu-miR-182; mmu-miR-1224; mmu-miR-672; mmu-miR-421
1810011O10Rik	1.396	39	27.937	mmu-miR-200a; mmu-miR-145; mmu-miR-713; mmu-miR-335-5p; mmu-miR-96; mmu-miR-369-3p; mmu-miR-466b-3p; mmu-miR-30d; mmu-miR-30a; mmu-miR-155; mmu-miR-205; mmu-miR-290-3p; mmu-miR-543; mmu-miR-34a; mmu-miR-467a; mmu-miR-30b; mmu-miR-182; mmu-miR-129-2-3p; mmu-miR-292-3p; mmu-miR-129-1-3p; mmu-miR-466a-3p; mmu-miR-148b; mmu-miR-125a-5p; mmu-miR-374; mmu-miR-148a; mmu-miR-125b-5p; mmu-miR-376c; mmu-mi…
1810019J16Rik	0.865	11	12.7168	mmu-miR-297c; mmu-miR-669l; mmu-miR-134; mmu-miR-132; mmu-miR-669a-5p; mmu-miR-423-3p; mmu-miR-669f-5p; mmu-miR-103; mmu-miR-421; mmu-miR-297a; mmu-miR-28
1810037I17Rik	0.705	10	14.1844	mmu-miR-466c-3p; mmu-miR-350; mmu-miR-335-5p; mmu-miR-374; mmu-miR-30b; mmu-miR-466g; mmu-miR-369-3p; mmu-miR-30d; mmu-miR-466b-3p; mmu-miR-30a
2010300C02Rik	0.58	14	24.1379	mmu-miR-152; mmu-miR-1960; mmu-miR-148b; mmu-miR-145; mmu-miR-335-5p; mmu-miR-431; mmu-miR-148a; mmu-miR-541; mmu-miR-19a; mmu-miR-376b; mmu-miR-182; mmu-miR-33; mmu-miR-423-5p; mmu-miR-19b
2410002F23Rik	0.792	35	44.1919	mmu-miR-302d; mmu-miR-142-3p; mmu-miR-467e; mmu-miR-350; mmu-miR-297c; mmu-miR-93; mmu-miR-466g; mmu-miR-467c; mmu-miR-20b; mmu-miR-295; mmu-miR-20a; mmu-miR-340-5p; mmu-miR-18b; mmu-miR-291b-3p; mmu-miR-290-3p; mmu-miR-467a; mmu-miR-106b; mmu-miR-467h; mmu-miR-193b; mmu-miR-1983; mmu-miR-106a; mmu-miR-17; mmu-miR-291a-3p; mmu-miR-33; mmu-miR-142-5p; mmu-miR-292-3p; mmu-miR-297a; mmu-miR-1935; mm…
2610528J11Rik	0.433	8	18.4758	mmu-miR-484; mmu-miR-182; mmu-miR-335-3p; mmu-miR-1224; mmu-miR-335-5p; mmu-miR-125b-5p; mmu-miR-96; mmu-miR-125a-5p
2810408A11Rik	1.531	34	22.2077	mmu-miR-495; mmu-miR-29b; mmu-miR-130a; mmu-miR-130b; mmu-miR-150; mmu-miR-674; mmu-miR-323-3p; mmu-miR-29c; mmu-miR-205; mmu-miR-27a; mmu-miR-468; mmu-miR-1952; mmu-miR-195; mmu-miR-124; mmu-miR-148b; mmu-miR-1960; mmu-miR-16; mmu-miR-148a; mmu-miR-760-5p; mmu-miR-18b; mmu-miR-151-5p; mmu-miR-741; mmu-miR-1196; mmu-miR-152; mmu-miR-29a; mmu-miR-760-3p; mmu-miR-15a; mmu-miR-301a; mmu-miR-193b; mm…
2810417H13Rik	1.663	21	12.6278	mmu-miR-669a-3p; mmu-miR-495; mmu-miR-467e; mmu-miR-297c; mmu-miR-669l; mmu-miR-136; mmu-miR-669d; mmu-miR-669f-5p; mmu-miR-340-5p; mmu-miR-376c; mmu-miR-669o-3p; mmu-miR-669a-5p; mmu-miR-467h; mmu-miR-103; mmu-miR-329; mmu-miR-26b; mmu-miR-381; mmu-miR-297a; mmu-miR-26a; mmu-miR-410; mmu-miR-466f
4833439L19Rik	1.394	19	13.6298	mmu-miR-142-3p; mmu-miR-145; mmu-miR-713; mmu-miR-467f; mmu-miR-23b; mmu-miR-466b-3p; mmu-miR-466c-3p; mmu-miR-669o-5p; mmu-miR-290-3p; mmu-miR-760-3p; mmu-miR-543; mmu-miR-27a; mmu-miR-378; mmu-miR-467a; mmu-miR-193b; mmu-miR-1224; mmu-miR-292-3p; mmu-miR-33; mmu-miR-23a
4930432K21Rik	0.303	5	16.5017	mmu-miR-468; mmu-miR-103; mmu-miR-495; mmu-miR-292-5p; mmu-miR-760-5p
5830418K08Rik	0.536	15	27.9851	mmu-miR-466c-3p; mmu-miR-466a-3p; mmu-miR-93; mmu-miR-96; mmu-miR-106b; mmu-miR-541; mmu-miR-468; mmu-miR-106a; mmu-miR-182; mmu-miR-20b; mmu-miR-17; mmu-miR-674; mmu-miR-20a; mmu-miR-142-5p; mmu-miR-466b-3p
9430020K01Rik	2.608	73	27.9908	mmu-miR-495; mmu-miR-29b; mmu-miR-713; mmu-miR-96; mmu-miR-130a; mmu-miR-466g; mmu-miR-19a; mmu-miR-130b; mmu-miR-369-3p; mmu-miR-467f; mmu-miR-340-5p; mmu-miR-466b-3p; mmu-miR-296-5p; mmu-miR-323-3p; mmu-miR-434-3p; mmu-miR-181a; mmu-miR-29c; mmu-miR-205; mmu-miR-669f-3p; mmu-miR-543; mmu-miR-27a; mmu-miR-1198-5p; mmu-miR-541; mmu-miR-1983; mmu-miR-182; mmu-miR-26b; mmu-miR-672; mmu-miR-154; mmu…
9630033F20Rik	2.758	50	18.1291	mmu-miR-200a; mmu-miR-495; mmu-miR-145; mmu-miR-93; mmu-miR-20a; mmu-miR-340-5p; mmu-miR-296-5p; mmu-miR-28; mmu-miR-434-3p; mmu-miR-669o-5p; mmu-miR-669o-3p; mmu-miR-1198-5p; mmu-miR-541; mmu-miR-106a; mmu-miR-17; mmu-miR-421; mmu-miR-302a; mmu-miR-423-5p; mmu-miR-669a-3p; mmu-miR-195; mmu-miR-302d; mmu-miR-124; mmu-miR-297c; mmu-miR-136; mmu-miR-125a-5p; mmu-miR-16; mmu-miR-484; mmu-miR-20b; mm…
9930013L23Rik	2.764	36	13.0246	mmu-miR-32; mmu-miR-433; mmu-miR-467e; mmu-miR-297c; mmu-miR-145; mmu-miR-713; mmu-miR-335-5p; mmu-miR-760-5p; mmu-miR-669d; mmu-miR-363-3p; mmu-miR-674; mmu-miR-762; mmu-miR-741; mmu-miR-323-3p; mmu-miR-101b; mmu-miR-28; mmu-miR-669o-5p; mmu-miR-34c; mmu-miR-21; mmu-miR-335-3p; mmu-miR-760-3p; mmu-miR-669f-3p; mmu-miR-367; mmu-miR-34a; mmu-miR-467h; mmu-miR-25; mmu-miR-468; mmu-miR-1983; mmu-miR…
A230050P20Rik	0.536	9	16.791	mmu-miR-302d; mmu-miR-291a-3p; mmu-miR-205; mmu-miR-295; mmu-miR-134; mmu-miR-1224; mmu-miR-762; mmu-miR-302a; mmu-miR-294
Aars	2.46	42	17.0732	mmu-miR-200a; mmu-miR-145; mmu-miR-713; mmu-miR-434-3p; mmu-miR-669f-3p; mmu-miR-367; mmu-miR-103; mmu-miR-129-2-3p; mmu-miR-202-3p; mmu-miR-672; mmu-miR-421; mmu-miR-154; mmu-miR-1952; mmu-miR-129-1-3p; mmu-miR-195; mmu-miR-32; mmu-miR-1960; mmu-miR-872; mmu-miR-16; mmu-miR-1198-3p; mmu-miR-363-3p; mmu-miR-484; mmu-miR-23b; mmu-miR-762; mmu-miR-487b; mmu-miR-141; mmu-miR-15a; mmu-miR-378; mmu-mi…
Aatk	1.091	19	17.4152	mmu-miR-34c; mmu-miR-330; mmu-miR-142-3p; mmu-miR-134; mmu-miR-34a; mmu-miR-1198-5p; mmu-miR-193b; mmu-miR-129-2-3p; mmu-miR-329; mmu-miR-154; mmu-miR-1952; mmu-miR-762; mmu-miR-296-5p; mmu-miR-129-1-3p
Abat	2.942	43	14.6159	mmu-miR-200a; mmu-miR-495; mmu-miR-713; mmu-miR-335-5p; mmu-miR-96; mmu-miR-200b; mmu-miR-150; mmu-miR-369-3p; mmu-miR-340-5p; mmu-miR-30d; mmu-miR-30a; mmu-miR-434-3p; mmu-miR-367; mmu-miR-27a; mmu-miR-1198-5p; mmu-miR-30b; mmu-miR-468; mmu-miR-103; mmu-miR-423-5p; mmu-miR-32; mmu-miR-429; mmu-miR-374; mmu-miR-760-5p; mmu-miR-363-3p; mmu-miR-762; mmu-miR-101b; mmu-miR-141; mmu-miR-330; mmu-miR-3…
Abca1	3.156	86	27.2497	mmu-miR-495; mmu-miR-145; mmu-miR-804; mmu-miR-713; mmu-miR-130a; mmu-miR-200b; mmu-miR-431; mmu-miR-19a; mmu-miR-130b; mmu-miR-674; mmu-miR-467f; mmu-miR-466b-3p; mmu-miR-291a-5p; mmu-miR-323-3p; mmu-miR-205; mmu-miR-291b-5p; mmu-miR-132; mmu-miR-34a; mmu-miR-1198-5p; mmu-miR-541; mmu-miR-129-2-3p; mmu-miR-26b; mmu-miR-129-1-3p; mmu-miR-423-5p; mmu-miR-19b; mmu-miR-195; mmu-miR-350; mmu-miR-124;…
Abi2	4.243	123	28.9889	mmu-miR-495; mmu-miR-93; mmu-miR-713; mmu-miR-335-5p; mmu-miR-96; mmu-miR-466g; mmu-miR-431; mmu-miR-19a; mmu-miR-20a; mmu-miR-466b-3p; mmu-miR-30d; mmu-miR-323-3p; mmu-miR-30a; mmu-miR-21; mmu-miR-669f-3p; mmu-miR-468; mmu-miR-106a; mmu-miR-17; mmu-miR-129-2-3p; mmu-miR-672; mmu-miR-381; mmu-miR-129-1-3p; mmu-miR-466a-3p; mmu-miR-195; mmu-miR-433; mmu-miR-148b; mmu-miR-669l; mmu-miR-136; mmu-miR…
Acaa1b	0.315	8	25.3968	mmu-miR-433; mmu-miR-181a; mmu-miR-152; mmu-miR-103; mmu-miR-205; mmu-miR-148b; mmu-miR-543; mmu-miR-148a
Acat3	0.827	28	33.8573	mmu-miR-669a-3p; mmu-miR-32; mmu-let-7g; mmu-miR-1960; mmu-miR-148b; mmu-miR-130a; mmu-miR-148a; mmu-miR-484; mmu-miR-363-3p; mmu-miR-130b; mmu-miR-340-5p; mmu-let-7c; mmu-miR-330; mmu-miR-152; mmu-miR-335-3p; mmu-miR-367; mmu-let-7a; mmu-miR-669o-3p; mmu-miR-22; mmu-miR-301a; mmu-miR-25; mmu-let-7e; mmu-miR-1224; mmu-miR-202-3p; mmu-miR-142-5p; mmu-miR-1935
Accs	2.264	15	6.62544	mmu-miR-669o-5p; mmu-miR-669l; mmu-miR-134; mmu-miR-669a-5p; mmu-miR-22; mmu-miR-532-5p; mmu-miR-669f-5p; mmu-miR-329; mmu-miR-381; mmu-miR-421; mmu-miR-762; mmu-miR-101b; mmu-miR-28; mmu-miR-423-5p
Acss1	1.508	15	9.94695	mmu-miR-330; mmu-miR-21; mmu-miR-495; mmu-miR-96; mmu-miR-378; mmu-miR-872; mmu-miR-30b; mmu-miR-1198-5p; mmu-miR-150; mmu-miR-672; mmu-miR-154; mmu-miR-18b; mmu-miR-30d; mmu-miR-296-5p; mmu-miR-30a
Actg1	0.71	13	18.3099	mmu-miR-29c; mmu-miR-29b; mmu-miR-29a; mmu-miR-297c; mmu-miR-1960; mmu-miR-22; mmu-miR-378; mmu-miR-136; mmu-miR-125a-5p; mmu-miR-182; mmu-miR-125b-5p; mmu-miR-297a; mmu-miR-377
Actn3	0.122	2	16.3934	mmu-miR-484; mmu-miR-760-5p
Acvr2b	0.04	1	25	mmu-miR-674
Acyp2	0.334	13	38.9222	mmu-miR-466a-3p; mmu-miR-32; mmu-miR-181a; mmu-miR-543; mmu-miR-367; mmu-miR-713; mmu-miR-25; mmu-miR-363-3p; mmu-miR-26b; mmu-miR-467f; mmu-miR-26a; mmu-miR-323-3p
Adam15	0.899	12	13.3482	mmu-miR-22; mmu-miR-378; mmu-miR-125a-5p; mmu-miR-19a; mmu-miR-150; mmu-miR-1224; mmu-miR-125b-5p; mmu-miR-18b; mmu-miR-762; mmu-miR-423-5p; mmu-miR-377; mmu-miR-19b
Adamts1	1.574	56	35.5781	mmu-miR-93; mmu-miR-713; mmu-miR-130a; mmu-miR-130b; mmu-miR-674; mmu-miR-369-3p; mmu-miR-20a; mmu-miR-467f; mmu-miR-340-5p; mmu-miR-181a; mmu-let-7a; mmu-miR-132; mmu-miR-468; mmu-miR-106a; mmu-miR-17; mmu-miR-202-3p; mmu-miR-672; mmu-miR-421; mmu-miR-381; mmu-miR-423-5p; mmu-let-7g; mmu-miR-466a-3p; mmu-miR-350; mmu-miR-669l; mmu-miR-374; mmu-miR-20b; mmu-miR-669f-5p; mmu-miR-376c; mmu-let-7c; …
Adamts2	3.544	58	16.3657	mmu-miR-29b; mmu-miR-93; mmu-miR-130a; mmu-miR-466g; mmu-miR-431; mmu-miR-130b; mmu-miR-20a; mmu-miR-296-5p; mmu-miR-669o-5p; mmu-miR-181a; mmu-miR-29c; mmu-miR-669f-3p; mmu-miR-191; mmu-miR-1983; mmu-miR-106a; mmu-miR-129-2-3p; mmu-miR-17; mmu-miR-202-3p; mmu-miR-421; mmu-miR-381; mmu-miR-1952; mmu-miR-129-1-3p; mmu-miR-148b; mmu-miR-350; mmu-miR-760-5p; mmu-miR-148a; mmu-miR-20b; mmu-miR-18b; m…
Adamts5	4.44	115	25.9009	mmu-miR-495; mmu-miR-93; mmu-miR-804; mmu-miR-713; mmu-miR-335-5p; mmu-miR-466g; mmu-miR-467c; mmu-miR-19a; mmu-miR-20a; mmu-miR-340-5p; mmu-miR-21; mmu-miR-290-3p; mmu-miR-669f-3p; mmu-miR-541; mmu-miR-468; mmu-miR-106a; mmu-miR-17; mmu-miR-381; mmu-miR-292-3p; mmu-miR-302a; mmu-miR-669a-3p; mmu-miR-302d; mmu-miR-124; mmu-miR-148b; mmu-miR-669l; mmu-miR-136; mmu-miR-148a; mmu-miR-669f-5p; mmu-mi…
Adat1	1.498	19	12.6836	mmu-miR-195; mmu-miR-16; mmu-miR-484; mmu-miR-150; mmu-miR-340-5p; mmu-miR-762; mmu-miR-21; mmu-miR-330; mmu-miR-34c; mmu-miR-155; mmu-miR-205; mmu-miR-22; mmu-miR-34a; mmu-miR-15a; mmu-miR-532-5p; mmu-miR-103; mmu-miR-142-5p; mmu-miR-15b; mmu-miR-292-5p
Add3	2.109	50	23.7079	mmu-miR-467e; mmu-miR-145; mmu-miR-96; mmu-miR-19a; mmu-miR-150; mmu-miR-674; mmu-miR-467f; mmu-miR-340-5p; mmu-miR-466b-3p; mmu-miR-323-3p; mmu-miR-21; mmu-miR-155; mmu-miR-669f-3p; mmu-miR-543; mmu-miR-669o-3p; mmu-miR-27a; mmu-miR-1198-5p; mmu-miR-467h; mmu-miR-182; mmu-miR-381; mmu-miR-1952; mmu-miR-19b; mmu-miR-466a-3p; mmu-miR-669a-3p; mmu-miR-433; mmu-miR-350; mmu-miR-669l; mmu-miR-136; mm…
Adm	0.652	12	18.4049	mmu-miR-32; mmu-miR-34c; mmu-miR-181a; mmu-miR-495; mmu-miR-367; mmu-miR-34a; mmu-miR-25; mmu-miR-363-3p; mmu-miR-26b; mmu-miR-1952; mmu-miR-26a; mmu-miR-410
Adora2b	0.728	17	23.3516	mmu-miR-669o-5p; mmu-miR-145; mmu-miR-669l; mmu-miR-669a-5p; mmu-miR-429; mmu-miR-22; mmu-miR-27a; mmu-miR-374; mmu-miR-200b; mmu-miR-669d; mmu-miR-669f-5p; mmu-miR-200c; mmu-miR-323-3p; mmu-miR-377
Adra2a	1.37	47	34.3066	mmu-miR-200a; mmu-miR-495; mmu-miR-93; mmu-miR-804; mmu-miR-713; mmu-miR-335-5p; mmu-miR-96; mmu-miR-674; mmu-miR-20a; mmu-miR-467f; mmu-miR-466b-3p; mmu-miR-30d; mmu-miR-291a-5p; mmu-miR-30a; mmu-miR-291b-5p; mmu-miR-30b; mmu-miR-191; mmu-miR-182; mmu-miR-106a; mmu-miR-17; mmu-miR-1952; mmu-miR-302a; mmu-miR-302d; mmu-miR-20b; mmu-miR-295; mmu-miR-23b; mmu-miR-762; mmu-miR-376c; mmu-miR-141; mmu…
Aebp1	0.239	1	4.1841	mmu-miR-1198-5p
Afap1l1	2.45	56	22.8571	mmu-miR-200a; mmu-miR-335-5p; mmu-miR-290-3p; mmu-miR-155; mmu-let-7a; mmu-miR-467a; mmu-miR-468; mmu-miR-1983; mmu-miR-103; mmu-miR-129-2-3p; mmu-miR-672; mmu-miR-421; mmu-miR-381; mmu-miR-292-3p; mmu-miR-129-1-3p; mmu-miR-302a; mmu-let-7g; mmu-miR-195; mmu-miR-302d; mmu-miR-148b; mmu-miR-1960; mmu-miR-297c; mmu-miR-16; mmu-miR-760-5p; mmu-miR-148a; mmu-miR-295; mmu-miR-18b; mmu-let-7c; mmu-miR-…
Agpat2	0.53	16	30.1887	mmu-miR-350; mmu-miR-29b; mmu-miR-124; mmu-miR-150; mmu-miR-762; mmu-miR-377; mmu-miR-323-3p; mmu-miR-290-3p; mmu-miR-29a; mmu-miR-29c; mmu-miR-760-3p; mmu-miR-467a; mmu-miR-129-2-3p; mmu-miR-292-3p; mmu-miR-1935; mmu-miR-129-1-3p
Agpat6	1.606	22	13.6986	mmu-miR-804; mmu-miR-125a-5p; mmu-miR-760-5p; mmu-miR-669d; mmu-miR-484; mmu-miR-150; mmu-miR-125b-5p; mmu-miR-762; mmu-miR-296-5p; mmu-miR-205; mmu-miR-335-3p; mmu-miR-134; mmu-miR-293; mmu-miR-27a; mmu-miR-378; mmu-miR-183; mmu-miR-468; mmu-miR-1224; mmu-miR-672; mmu-miR-1935
Ahcy	1.139	22	19.3152	mmu-miR-433; mmu-miR-495; mmu-miR-467e; mmu-miR-350; mmu-miR-297c; mmu-miR-1960; mmu-miR-335-5p; mmu-miR-374; mmu-miR-760-5p; mmu-miR-150; mmu-miR-762; mmu-miR-377; mmu-miR-330; mmu-miR-205; mmu-miR-760-3p; mmu-miR-22; mmu-miR-467h; mmu-miR-1983; mmu-miR-1952; mmu-miR-297a
Ahdc1	1.167	20	17.138	mmu-miR-1960; mmu-miR-148b; mmu-miR-374; mmu-miR-466g; mmu-miR-148a; mmu-miR-150; mmu-miR-369-3p; mmu-miR-720; mmu-miR-152; mmu-miR-330; mmu-miR-760-3p; mmu-miR-669f-3p; mmu-miR-378; mmu-miR-381; mmu-miR-1935; mmu-miR-292-5p; mmu-miR-423-5p
Ahnak	0.871	32	36.7394	mmu-miR-433; mmu-miR-350; mmu-miR-29b; mmu-miR-124; mmu-miR-93; mmu-miR-429; mmu-miR-200b; mmu-miR-20b; mmu-miR-20a; mmu-miR-30d; mmu-miR-291a-5p; mmu-miR-30a; mmu-miR-181a; mmu-miR-29c; mmu-miR-290-3p; mmu-miR-29a; mmu-miR-669f-3p; mmu-miR-291b-5p; mmu-miR-22; mmu-miR-467a; mmu-miR-30b; mmu-miR-106b; mmu-miR-106a; mmu-miR-17; mmu-miR-329; mmu-miR-200c; mmu-miR-381; mmu-miR-33; mmu-miR-292-3p
Ahr	2.715	95	34.9908	mmu-miR-93; mmu-miR-713; mmu-miR-467c; mmu-miR-20a; mmu-miR-340-5p; mmu-miR-466b-3p; mmu-miR-30d; mmu-miR-30a; mmu-miR-434-3p; mmu-miR-29c; mmu-miR-290-3p; mmu-miR-541; mmu-miR-468; mmu-miR-106a; mmu-miR-17; mmu-miR-202-3p; mmu-miR-292-3p; mmu-miR-302a; mmu-miR-302d; mmu-miR-195; mmu-miR-136; mmu-miR-20b; mmu-miR-295; mmu-miR-23b; mmu-miR-466c-3p; mmu-miR-335-3p; mmu-miR-15a; mmu-miR-532-5p; mmu-…
AI661453	1.245	35	28.1124	mmu-miR-29b; mmu-miR-145; mmu-miR-669l; mmu-miR-136; mmu-miR-374; mmu-miR-19a; mmu-miR-669f-5p; mmu-miR-150; mmu-miR-674; mmu-miR-369-3p; mmu-miR-467f; mmu-miR-296-5p; mmu-miR-29c; mmu-miR-205; mmu-miR-290-3p; mmu-miR-29a; mmu-miR-760-3p; mmu-miR-669f-3p; mmu-miR-669a-5p; mmu-miR-467a; mmu-miR-376b; mmu-miR-1983; mmu-miR-182; mmu-miR-129-2-3p; mmu-miR-292-3p; mmu-miR-1935; mmu-miR-129-1-3p; mmu-m…
Aifm1	0.173	3	17.341	mmu-miR-350; mmu-miR-335-3p; mmu-miR-28
Aim1	1.562	31	19.8464	mmu-miR-195; mmu-miR-200a; mmu-miR-495; mmu-miR-297c; mmu-miR-713; mmu-miR-335-5p; mmu-miR-16; mmu-miR-466g; mmu-miR-431; mmu-miR-18b; mmu-miR-101b; mmu-miR-141; mmu-miR-330; mmu-miR-155; mmu-miR-205; mmu-miR-669f-3p; mmu-miR-15a; mmu-miR-27a; mmu-miR-532-5p; mmu-miR-193b; mmu-miR-468; mmu-miR-103; mmu-miR-1983; mmu-miR-421; mmu-miR-297a; mmu-miR-1935; mmu-miR-15b; mmu-miR-292-5p; mmu-miR-423-5p
Aim1l	0.097	2	20.6186	mmu-miR-21; mmu-miR-27a
Ajap1	1.155	18	15.5844	mmu-miR-350; mmu-miR-1960; mmu-miR-148b; mmu-miR-96; mmu-miR-148a; mmu-miR-150; mmu-miR-369-3p; mmu-miR-340-5p; mmu-miR-741; mmu-miR-377; mmu-miR-152; mmu-miR-193b; mmu-miR-182; mmu-miR-129-2-3p; mmu-miR-381; mmu-miR-1935; mmu-miR-129-1-3p
Akap1	1.961	37	18.8679	mmu-miR-195; mmu-miR-200a; mmu-miR-495; mmu-miR-29b; mmu-miR-804; mmu-miR-713; mmu-miR-96; mmu-miR-16; mmu-miR-19a; mmu-miR-484; mmu-miR-674; mmu-miR-762; mmu-miR-466b-3p; mmu-miR-376c; mmu-miR-296-5p; mmu-miR-466c-3p; mmu-miR-141; mmu-miR-335-3p; mmu-miR-29c; mmu-miR-29a; mmu-miR-669f-3p; mmu-miR-22; mmu-miR-378; mmu-miR-15a; mmu-miR-193b; mmu-miR-182; mmu-miR-103; mmu-miR-329; mmu-miR-1952; mmu…
Akap11	3.53	82	23.2295	mmu-miR-495; mmu-miR-93; mmu-miR-713; mmu-miR-467c; mmu-miR-19a; mmu-miR-20a; mmu-miR-340-5p; mmu-miR-323-3p; mmu-miR-290-3p; mmu-miR-155; mmu-miR-367; mmu-miR-106a; mmu-miR-17; mmu-miR-292-3p; mmu-miR-154; mmu-miR-195; mmu-miR-433; mmu-miR-148b; mmu-miR-669l; mmu-miR-136; mmu-miR-125a-5p; mmu-miR-148a; mmu-miR-669f-5p; mmu-miR-20b; mmu-miR-125b-5p; mmu-miR-34c; mmu-miR-152; mmu-miR-335-3p; mmu-m…
Akap13	3.986	92	23.0808	mmu-miR-93; mmu-miR-804; mmu-miR-713; mmu-miR-335-5p; mmu-miR-466g; mmu-miR-20a; mmu-miR-323-3p; mmu-miR-28; mmu-miR-29c; mmu-miR-106a; mmu-miR-17; mmu-miR-202-3p; mmu-miR-302a; mmu-miR-466a-3p; mmu-miR-302d; mmu-miR-195; mmu-miR-124; mmu-miR-148b; mmu-miR-669l; mmu-miR-136; mmu-miR-125a-5p; mmu-miR-760-5p; mmu-miR-148a; mmu-miR-669f-5p; mmu-miR-20b; mmu-miR-295; mmu-miR-125b-5p; mmu-miR-34c; mmu…
Aldh1a2	0.649	24	36.98	mmu-miR-1960; mmu-miR-669l; mmu-miR-713; mmu-miR-96; mmu-miR-1198-3p; mmu-miR-669f-5p; mmu-miR-484; mmu-miR-23b; mmu-miR-340-5p; mmu-miR-377; mmu-miR-34c; mmu-miR-760-3p; mmu-miR-132; mmu-miR-34a; mmu-miR-669a-5p; mmu-miR-182; mmu-miR-154; mmu-miR-23a; mmu-miR-466f
Aldh1b1	0.581	14	24.0964	mmu-miR-141; mmu-miR-330; mmu-miR-21; mmu-miR-200a; mmu-miR-205; mmu-miR-378; mmu-miR-532-5p; mmu-miR-484; mmu-miR-674; mmu-miR-1224; mmu-miR-762; mmu-miR-296-5p
Aldh7a1	2.231	40	17.9292	mmu-miR-200a; mmu-miR-804; mmu-miR-200b; mmu-miR-340-5p; mmu-miR-296-5p; mmu-miR-291a-5p; mmu-miR-28; mmu-miR-155; mmu-miR-291b-5p; mmu-miR-669o-3p; mmu-miR-1198-5p; mmu-miR-1983; mmu-miR-129-2-3p; mmu-miR-672; mmu-miR-129-1-3p; mmu-miR-669a-3p; mmu-miR-1960; mmu-miR-350; mmu-miR-669l; mmu-miR-429; mmu-miR-136; mmu-miR-872; mmu-miR-484; mmu-miR-669f-5p; mmu-miR-377; mmu-miR-141; mmu-miR-330; mmu-…
Aldoc	1.427	36	25.2278	mmu-miR-145; mmu-miR-467c; mmu-miR-19a; mmu-miR-28; mmu-miR-290-3p; mmu-let-7a; mmu-miR-467a; mmu-miR-541; mmu-miR-182; mmu-miR-129-2-3p; mmu-miR-292-3p; mmu-miR-1952; mmu-miR-129-1-3p; mmu-miR-302a; mmu-miR-423-5p; mmu-miR-19b; mmu-let-7g; mmu-miR-302d; mmu-miR-124; mmu-miR-148b; mmu-miR-148a; mmu-miR-295; mmu-miR-762; mmu-let-7c; mmu-miR-291b-3p; mmu-miR-152; mmu-miR-760-3p; mmu-miR-134; mmu-mi…
Alg13	3.682	102	27.7023	mmu-miR-495; mmu-miR-145; mmu-miR-804; mmu-miR-335-5p; mmu-miR-96; mmu-miR-431; mmu-miR-19a; mmu-miR-340-5p; mmu-miR-29c; mmu-miR-290-3p; mmu-miR-669f-3p; mmu-let-7a; mmu-miR-541; mmu-miR-468; mmu-miR-129-2-3p; mmu-miR-202-3p; mmu-miR-292-3p; mmu-miR-129-1-3p; mmu-miR-669a-3p; mmu-let-7g; mmu-miR-136; mmu-miR-34c; mmu-miR-330; mmu-miR-127; mmu-miR-134; mmu-miR-378; mmu-miR-532-5p; mmu-miR-183; mm…
Alg14	1.308	17	12.9969	mmu-miR-142-3p; mmu-miR-495; mmu-miR-804; mmu-miR-872; mmu-miR-374; mmu-miR-532-5p; mmu-miR-329; mmu-miR-369-3p; mmu-miR-154; mmu-miR-1952; mmu-miR-292-5p; mmu-miR-741; mmu-miR-466f
Alkbh3	0.335	5	14.9254	mmu-miR-330; mmu-miR-674; mmu-miR-22; mmu-miR-154; mmu-miR-423-5p
Amd1	1.871	34	18.1721	mmu-miR-302d; mmu-miR-200a; mmu-miR-1960; mmu-miR-148b; mmu-miR-145; mmu-miR-130a; mmu-miR-872; mmu-miR-374; mmu-miR-148a; mmu-miR-467c; mmu-miR-130b; mmu-miR-295; mmu-miR-291a-5p; mmu-miR-141; mmu-miR-291b-3p; mmu-miR-330; mmu-miR-152; mmu-miR-290-3p; mmu-miR-543; mmu-miR-291b-5p; mmu-miR-134; mmu-miR-467a; mmu-miR-378; mmu-miR-27a; mmu-miR-301a; mmu-miR-183; mmu-miR-468; mmu-miR-291a-3p; mmu-mi…
Amot	3.576	88	24.6085	mmu-miR-495; mmu-miR-93; mmu-miR-804; mmu-miR-713; mmu-miR-335-5p; mmu-miR-96; mmu-miR-466g; mmu-miR-431; mmu-miR-20a; mmu-miR-340-5p; mmu-miR-466b-3p; mmu-miR-28; mmu-miR-669f-3p; mmu-miR-468; mmu-miR-106a; mmu-miR-17; mmu-miR-672; mmu-miR-154; mmu-miR-433; mmu-miR-669l; mmu-miR-136; mmu-miR-669f-5p; mmu-miR-20b; mmu-miR-23b; mmu-miR-466c-3p; mmu-miR-330; mmu-miR-335-3p; mmu-miR-134; mmu-miR-22;…
Amotl1	5.826	149	25.575	mmu-miR-93; mmu-miR-804; mmu-miR-713; mmu-miR-335-5p; mmu-miR-96; mmu-miR-466g; mmu-miR-431; mmu-miR-467c; mmu-miR-19a; mmu-miR-20a; mmu-miR-340-5p; mmu-miR-323-3p; mmu-miR-21; mmu-miR-29c; mmu-miR-290-3p; mmu-miR-367; mmu-miR-468; mmu-miR-106a; mmu-miR-17; mmu-miR-672; mmu-miR-292-3p; mmu-miR-302a; mmu-miR-669a-3p; mmu-miR-466a-3p; mmu-miR-302d; mmu-miR-669l; mmu-miR-125a-5p; mmu-miR-669f-5p; mm…
Angptl2	1.431	50	34.9406	mmu-miR-200a; mmu-miR-145; mmu-miR-130a; mmu-miR-130b; mmu-miR-467f; mmu-miR-28; mmu-miR-669o-5p; mmu-miR-669f-3p; mmu-miR-367; mmu-let-7a; mmu-miR-132; mmu-miR-34a; mmu-miR-1198-5p; mmu-miR-202-3p; mmu-miR-381; mmu-miR-423-5p; mmu-let-7g; mmu-miR-32; mmu-miR-124; mmu-miR-148b; mmu-miR-669l; mmu-miR-148a; mmu-miR-669f-5p; mmu-miR-363-3p; mmu-miR-18b; mmu-let-7c; mmu-miR-741; mmu-miR-101b; mmu-miR…
Ank	1.692	27	15.9574	mmu-miR-669a-3p; mmu-miR-433; mmu-miR-335-5p; mmu-miR-872; mmu-miR-431; mmu-miR-674; mmu-miR-720; mmu-miR-467f; mmu-miR-340-5p; mmu-miR-762; mmu-miR-466b-3p; mmu-miR-101b; mmu-miR-466c-3p; mmu-miR-181a; mmu-miR-330; mmu-miR-134; mmu-miR-669f-3p; mmu-miR-669o-3p; mmu-miR-129-2-3p; mmu-miR-672; mmu-miR-129-1-3p
Ankmy2	0.89	32	35.9551	mmu-miR-302d; mmu-miR-467e; mmu-miR-350; mmu-miR-297c; mmu-miR-93; mmu-miR-19a; mmu-miR-20b; mmu-miR-674; mmu-miR-295; mmu-miR-20a; mmu-miR-23b; mmu-miR-18b; mmu-miR-181a; mmu-miR-543; mmu-miR-27a; mmu-miR-106b; mmu-miR-467h; mmu-miR-183; mmu-miR-541; mmu-miR-106a; mmu-miR-17; mmu-miR-291a-3p; mmu-miR-1224; mmu-miR-26b; mmu-miR-421; mmu-miR-297a; mmu-miR-26a; mmu-miR-302a; mmu-miR-23a; mmu-miR-29…
Ankrd13b	1.786	29	16.2374	mmu-miR-195; mmu-miR-1960; mmu-miR-148b; mmu-miR-16; mmu-miR-125a-5p; mmu-miR-760-5p; mmu-miR-148a; mmu-miR-484; mmu-miR-674; mmu-miR-720; mmu-miR-18b; mmu-miR-125b-5p; mmu-miR-762; mmu-miR-291b-3p; mmu-miR-330; mmu-miR-152; mmu-miR-127; mmu-miR-293; mmu-miR-15a; mmu-miR-1198-5p; mmu-miR-103; mmu-miR-129-2-3p; mmu-miR-421; mmu-miR-129-1-3p; mmu-miR-15b
Ankrd13c	2.388	76	31.8258	mmu-miR-200a; mmu-miR-495; mmu-miR-29b; mmu-miR-145; mmu-miR-93; mmu-miR-96; mmu-miR-466g; mmu-miR-674; mmu-miR-20a; mmu-miR-467f; mmu-miR-466b-3p; mmu-miR-434-3p; mmu-miR-181a; mmu-miR-29c; mmu-miR-543; mmu-miR-367; mmu-miR-27a; mmu-miR-1198-5p; mmu-miR-468; mmu-miR-106a; mmu-miR-103; mmu-miR-1983; mmu-miR-17; mmu-miR-421; mmu-miR-302a; mmu-miR-466a-3p; mmu-miR-302d; mmu-miR-32; mmu-miR-136; mmu…
Anln	1.836	56	30.5011	mmu-miR-467e; mmu-miR-466g; mmu-miR-431; mmu-miR-19a; mmu-miR-674; mmu-miR-340-5p; mmu-miR-30d; mmu-miR-30a; mmu-miR-28; mmu-miR-543; mmu-miR-27a; mmu-miR-30b; mmu-miR-1198-5p; mmu-miR-467h; mmu-miR-19b; mmu-miR-195; mmu-miR-433; mmu-miR-1960; mmu-miR-297c; mmu-miR-669l; mmu-miR-16; mmu-miR-374; mmu-miR-669f-5p; mmu-miR-484; mmu-miR-23b; mmu-miR-741; mmu-miR-151-5p; mmu-miR-101b; mmu-miR-377; mmu…
Ano9	0.681	12	17.6211	mmu-miR-669a-3p; mmu-miR-297c; mmu-miR-291b-5p; mmu-miR-669o-3p; mmu-miR-378; mmu-miR-1198-5p; mmu-miR-466g; mmu-miR-541; mmu-miR-297a; mmu-miR-291a-5p
Anp32a	1.197	25	20.8855	mmu-miR-32; mmu-miR-495; mmu-miR-297c; mmu-miR-93; mmu-miR-804; mmu-miR-466g; mmu-miR-363-3p; mmu-miR-20b; mmu-miR-20a; mmu-miR-330; mmu-miR-34c; mmu-miR-760-3p; mmu-miR-367; mmu-miR-132; mmu-miR-34a; mmu-miR-106b; mmu-miR-25; mmu-miR-1983; mmu-miR-106a; mmu-miR-17; mmu-miR-142-5p; mmu-miR-33; mmu-miR-1935; mmu-miR-297a
Anp32e	2.14	40	18.6916	mmu-miR-200a; mmu-miR-674; mmu-miR-467f; mmu-miR-340-5p; mmu-miR-291a-5p; mmu-miR-323-3p; mmu-miR-434-3p; mmu-miR-181a; mmu-miR-290-3p; mmu-miR-367; mmu-miR-291b-5p; mmu-miR-132; mmu-miR-467a; mmu-miR-27a; mmu-miR-129-2-3p; mmu-miR-292-3p; mmu-miR-129-1-3p; mmu-miR-423-5p; mmu-miR-195; mmu-miR-32; mmu-miR-466a-3p; mmu-miR-1960; mmu-miR-16; mmu-miR-484; mmu-miR-363-3p; mmu-miR-720; mmu-miR-23b; mm…
Antxr1	3.241	59	18.2043	mmu-miR-200a; mmu-miR-93; mmu-miR-713; mmu-miR-150; mmu-miR-674; mmu-miR-20a; mmu-miR-340-5p; mmu-miR-466b-3p; mmu-miR-296-5p; mmu-miR-323-3p; mmu-miR-434-3p; mmu-miR-669o-5p; mmu-miR-205; mmu-miR-543; mmu-miR-132; mmu-miR-669o-3p; mmu-miR-34a; mmu-miR-1198-5p; mmu-miR-1983; mmu-miR-106a; mmu-miR-103; mmu-miR-182; mmu-miR-129-2-3p; mmu-miR-17; mmu-miR-421; mmu-miR-1952; mmu-miR-129-1-3p; mmu-miR-…
Antxr2	3.779	97	25.6682	mmu-miR-495; mmu-miR-93; mmu-miR-804; mmu-miR-713; mmu-miR-96; mmu-miR-466g; mmu-miR-20a; mmu-miR-340-5p; mmu-miR-466b-3p; mmu-miR-29c; mmu-miR-669f-3p; mmu-let-7a; mmu-miR-106a; mmu-miR-17; mmu-miR-381; mmu-miR-154; mmu-miR-302a; mmu-miR-669a-3p; mmu-miR-466a-3p; mmu-miR-302d; mmu-let-7g; mmu-miR-195; mmu-miR-433; mmu-miR-148b; mmu-miR-136; mmu-miR-148a; mmu-miR-20b; mmu-miR-295; mmu-miR-23b; mm…
Aox1	0.335	11	32.8358	mmu-miR-19a; mmu-miR-1960; mmu-miR-145; mmu-miR-127; mmu-miR-335-5p; mmu-miR-762; mmu-miR-374; mmu-miR-19b
Ap1m2	0.375	3	8	mmu-miR-804; mmu-miR-713; mmu-miR-22
Ap1s3	2.291	26	11.3488	mmu-miR-467e; mmu-miR-804; mmu-miR-136; mmu-miR-431; mmu-miR-1198-3p; mmu-miR-23b; mmu-miR-18b; mmu-miR-181a; mmu-miR-330; mmu-miR-335-3p; mmu-miR-22; mmu-miR-382; mmu-miR-1198-5p; mmu-miR-532-5p; mmu-miR-467h; mmu-miR-183; mmu-miR-541; mmu-miR-468; mmu-miR-376b; mmu-miR-129-2-3p; mmu-miR-672; mmu-miR-129-1-3p; mmu-miR-23a; mmu-miR-410
Ap3b2	0.25	2	8	mmu-miR-1983; mmu-miR-205
Ap3m1	5.161	128	24.8014	mmu-miR-495; mmu-miR-93; mmu-miR-713; mmu-miR-96; mmu-miR-466g; mmu-miR-20a; mmu-miR-340-5p; mmu-miR-466b-3p; mmu-miR-30d; mmu-miR-323-3p; mmu-miR-30a; mmu-miR-28; mmu-miR-21; mmu-miR-29c; mmu-miR-290-3p; mmu-miR-155; mmu-miR-669f-3p; mmu-let-7a; mmu-miR-541; mmu-miR-106a; mmu-miR-17; mmu-miR-129-2-3p; mmu-miR-202-3p; mmu-miR-672; mmu-miR-381; mmu-miR-292-3p; mmu-miR-129-1-3p; mmu-miR-302a; mmu-m…
Apbb1ip	0.332	2	6.0241	mmu-miR-378; mmu-miR-323-3p
Aph1b	4.3	110	25.5814	mmu-miR-804; mmu-miR-713; mmu-miR-96; mmu-miR-466g; mmu-miR-431; mmu-miR-340-5p; mmu-miR-30d; mmu-miR-296-5p; mmu-miR-30a; mmu-miR-434-3p; mmu-miR-21; mmu-miR-155; mmu-miR-672; mmu-miR-381; mmu-miR-302a; mmu-miR-466a-3p; mmu-miR-302d; mmu-miR-195; mmu-miR-433; mmu-miR-148b; mmu-miR-669l; mmu-miR-125a-5p; mmu-miR-760-5p; mmu-miR-148a; mmu-miR-669f-5p; mmu-miR-295; mmu-miR-125b-5p; mmu-miR-23b; mmu…
Apln	2.567	63	24.5423	mmu-miR-467e; mmu-miR-93; mmu-miR-713; mmu-miR-96; mmu-miR-19a; mmu-miR-150; mmu-miR-369-3p; mmu-miR-20a; mmu-miR-291a-5p; mmu-miR-290-3p; mmu-miR-367; mmu-miR-291b-5p; mmu-miR-34a; mmu-miR-467a; mmu-miR-1198-5p; mmu-miR-467h; mmu-miR-106a; mmu-miR-182; mmu-miR-129-2-3p; mmu-miR-17; mmu-miR-292-3p; mmu-miR-1952; mmu-miR-129-1-3p; mmu-miR-19b; mmu-miR-32; mmu-miR-350; mmu-miR-297c; mmu-miR-374; mm…
Aplp2	1.314	34	25.8752	mmu-miR-32; mmu-miR-467e; mmu-miR-297c; mmu-miR-1960; mmu-miR-145; mmu-miR-124; mmu-miR-713; mmu-miR-484; mmu-miR-363-3p; mmu-miR-467f; mmu-miR-340-5p; mmu-miR-762; mmu-miR-376c; mmu-miR-377; mmu-miR-28; mmu-miR-205; mmu-miR-669f-3p; mmu-miR-367; mmu-miR-134; mmu-miR-467h; mmu-miR-25; mmu-miR-1983; mmu-miR-1224; mmu-miR-1952; mmu-miR-142-5p; mmu-miR-297a; mmu-miR-466f; mmu-miR-410
Apobec1	1.015	10	9.85222	mmu-miR-466c-3p; mmu-miR-466a-3p; mmu-miR-297c; mmu-miR-134; mmu-miR-1198-5p; mmu-miR-431; mmu-miR-297a; mmu-miR-376c; mmu-miR-466b-3p; mmu-miR-423-5p
App	0.891	20	22.4467	mmu-miR-466a-3p; mmu-miR-495; mmu-miR-130a; mmu-miR-669d; mmu-miR-130b; mmu-miR-720; mmu-miR-340-5p; mmu-miR-376c; mmu-miR-291a-5p; mmu-miR-323-3p; mmu-miR-434-3p; mmu-miR-181a; mmu-miR-291b-5p; mmu-miR-669f-3p; mmu-miR-22; mmu-miR-301a; mmu-miR-468; mmu-miR-381
Aqr	0.269	12	44.6097	mmu-let-7g; mmu-miR-291b-5p; mmu-let-7a; mmu-miR-872; mmu-miR-468; mmu-let-7e; mmu-miR-103; mmu-miR-202-3p; mmu-miR-672; mmu-miR-340-5p; mmu-let-7c; mmu-miR-291a-5p
Arf3	2.712	38	14.0118	mmu-miR-29b; mmu-miR-713; mmu-miR-96; mmu-miR-130a; mmu-miR-130b; mmu-miR-28; mmu-miR-181a; mmu-miR-21; mmu-miR-29c; mmu-miR-367; mmu-miR-1198-5p; mmu-miR-541; mmu-miR-468; mmu-miR-182; mmu-miR-1952; mmu-miR-32; mmu-miR-124; mmu-miR-148b; mmu-miR-1960; mmu-miR-125a-5p; mmu-miR-148a; mmu-miR-363-3p; mmu-miR-125b-5p; mmu-miR-741; mmu-miR-152; mmu-miR-330; mmu-miR-29a; mmu-miR-134; mmu-miR-22; mmu-m…
Arf6	2.658	47	17.6825	mmu-miR-467e; mmu-miR-29b; mmu-miR-145; mmu-miR-200b; mmu-miR-466g; mmu-miR-19a; mmu-miR-467f; mmu-miR-340-5p; mmu-miR-323-3p; mmu-miR-28; mmu-miR-181a; mmu-miR-29c; mmu-miR-543; mmu-miR-27a; mmu-miR-467h; mmu-miR-1983; mmu-miR-26b; mmu-miR-381; mmu-miR-154; mmu-miR-19b; mmu-miR-350; mmu-miR-429; mmu-miR-136; mmu-miR-872; mmu-miR-1198-3p; mmu-miR-484; mmu-miR-23b; mmu-miR-762; mmu-miR-377; mmu-mi…
Arfgap2	1.146	27	23.5602	mmu-miR-195; mmu-miR-1960; mmu-miR-148b; mmu-miR-16; mmu-miR-125a-5p; mmu-miR-148a; mmu-miR-150; mmu-miR-125b-5p; mmu-miR-296-5p; mmu-miR-377; mmu-miR-330; mmu-miR-152; mmu-miR-22; mmu-miR-15a; mmu-miR-27a; mmu-miR-183; mmu-miR-103; mmu-miR-329; mmu-miR-1224; mmu-miR-672; mmu-miR-292-5p; mmu-miR-15b; mmu-miR-423-5p
Arfip2	2.035	22	10.8108	mmu-miR-195; mmu-miR-467e; mmu-miR-29b; mmu-miR-713; mmu-miR-16; mmu-miR-674; mmu-miR-23b; mmu-miR-296-5p; mmu-miR-741; mmu-miR-330; mmu-miR-205; mmu-miR-29a; mmu-miR-29c; mmu-miR-22; mmu-miR-15a; mmu-miR-378; mmu-miR-1198-5p; mmu-miR-467h; mmu-miR-142-5p; mmu-miR-33; mmu-miR-15b; mmu-miR-23a
Arhgap19	3.598	63	17.5097	mmu-miR-804; mmu-miR-713; mmu-miR-674; mmu-miR-296-5p; mmu-miR-28; mmu-miR-434-3p; mmu-miR-543; mmu-let-7a; mmu-miR-34a; mmu-miR-1893; mmu-miR-1198-5p; mmu-miR-541; mmu-miR-103; mmu-miR-1983; mmu-miR-202-3p; mmu-miR-302a; mmu-miR-423-5p; mmu-let-7g; mmu-miR-302d; mmu-miR-433; mmu-miR-124; mmu-miR-148b; mmu-miR-1960; mmu-miR-669l; mmu-miR-148a; mmu-miR-669d; mmu-miR-669f-5p; mmu-miR-295; mmu-miR-7…
Arhgap24	0.61	24	39.3443	mmu-miR-302d; mmu-miR-200a; mmu-miR-467e; mmu-miR-145; mmu-miR-96; mmu-miR-136; mmu-miR-467c; mmu-miR-295; mmu-miR-467f; mmu-miR-340-5p; mmu-miR-141; mmu-miR-291b-3p; mmu-miR-21; mmu-miR-290-3p; mmu-miR-467a; mmu-miR-467h; mmu-miR-291a-3p; mmu-miR-329; mmu-miR-292-3p; mmu-miR-302a; mmu-miR-294; mmu-miR-410
Arhgap9	0.273	6	21.978	mmu-miR-1983; mmu-miR-495; mmu-miR-200c; mmu-miR-429; mmu-miR-200b; mmu-miR-28
Arhgef17	3.654	68	18.6097	mmu-miR-467e; mmu-miR-145; mmu-miR-713; mmu-miR-335-5p; mmu-miR-130a; mmu-miR-466g; mmu-miR-467c; mmu-miR-19a; mmu-miR-130b; mmu-miR-30d; mmu-miR-30a; mmu-miR-290-3p; mmu-miR-34a; mmu-miR-467a; mmu-miR-30b; mmu-miR-1198-5p; mmu-miR-467h; mmu-miR-103; mmu-miR-1983; mmu-miR-129-2-3p; mmu-miR-672; mmu-miR-421; mmu-miR-292-3p; mmu-miR-154; mmu-miR-129-1-3p; mmu-miR-302a; mmu-miR-423-5p; mmu-miR-19b; …
Arhgef5	0.549	15	27.3224	mmu-miR-433; mmu-miR-29c; mmu-miR-29b; mmu-miR-29a; mmu-miR-290-3p; mmu-miR-713; mmu-miR-467a; mmu-miR-136; mmu-miR-103; mmu-miR-1224; mmu-miR-23b; mmu-miR-292-3p; mmu-miR-762; mmu-miR-23a; mmu-miR-741
Arid3a	3.082	76	24.6593	mmu-miR-495; mmu-miR-96; mmu-miR-19a; mmu-miR-674; mmu-miR-30d; mmu-miR-30a; mmu-miR-181a; mmu-miR-669f-3p; mmu-miR-543; mmu-let-7a; mmu-miR-27a; mmu-miR-30b; mmu-miR-182; mmu-miR-1983; mmu-miR-129-2-3p; mmu-miR-26b; mmu-miR-202-3p; mmu-miR-672; mmu-miR-381; mmu-miR-1952; mmu-miR-129-1-3p; mmu-miR-19b; mmu-let-7g; mmu-miR-433; mmu-miR-136; mmu-miR-125a-5p; mmu-miR-760-5p; mmu-miR-125b-5p; mmu-miR…
Arih2	2.14	62	28.972	mmu-miR-29b; mmu-miR-713; mmu-miR-335-5p; mmu-miR-96; mmu-miR-130a; mmu-miR-431; mmu-miR-130b; mmu-miR-150; mmu-miR-674; mmu-miR-340-5p; mmu-miR-296-5p; mmu-miR-434-3p; mmu-miR-29c; mmu-let-7a; mmu-miR-1983; mmu-miR-26b; mmu-miR-202-3p; mmu-miR-672; mmu-let-7g; mmu-miR-433; mmu-miR-148b; mmu-miR-1960; mmu-miR-125a-5p; mmu-miR-760-5p; mmu-miR-148a; mmu-miR-669d; mmu-miR-125b-5p; mmu-miR-18b; mmu-m…
Arl4c	2.861	45	15.7288	mmu-miR-804; mmu-miR-19a; mmu-miR-369-3p; mmu-miR-30d; mmu-miR-296-5p; mmu-miR-291a-5p; mmu-miR-30a; mmu-miR-669o-5p; mmu-miR-21; mmu-miR-155; mmu-miR-291b-5p; mmu-let-7a; mmu-miR-34a; mmu-miR-27a; mmu-miR-30b; mmu-miR-1983; mmu-miR-129-2-3p; mmu-miR-202-3p; mmu-miR-129-1-3p; mmu-miR-19b; mmu-miR-466a-3p; mmu-let-7g; mmu-miR-195; mmu-miR-350; mmu-miR-374; mmu-miR-125a-5p; mmu-miR-16; mmu-miR-669d…
Arl4d	0.577	16	27.7296	mmu-let-7g; mmu-miR-330; mmu-miR-495; mmu-miR-205; mmu-let-7a; mmu-miR-27a; mmu-miR-431; mmu-let-7e; mmu-miR-329; mmu-miR-340-5p; mmu-let-7c; mmu-miR-101b
Arl6ip5	0.743	23	30.9556	mmu-miR-495; mmu-miR-93; mmu-miR-130a; mmu-miR-466g; mmu-miR-484; mmu-miR-130b; mmu-miR-20b; mmu-miR-369-3p; mmu-miR-20a; mmu-miR-30d; mmu-miR-296-5p; mmu-miR-30a; mmu-miR-291b-3p; mmu-miR-205; mmu-miR-335-3p; mmu-miR-106b; mmu-miR-301a; mmu-miR-30b; mmu-miR-532-5p; mmu-miR-183; mmu-miR-106a; mmu-miR-17; mmu-miR-672
Arpc5	1.275	33	25.8824	mmu-miR-466a-3p; mmu-miR-32; mmu-miR-200a; mmu-miR-145; mmu-miR-124; mmu-miR-466g; mmu-miR-669d; mmu-miR-363-3p; mmu-miR-674; mmu-miR-30d; mmu-miR-291a-5p; mmu-miR-741; mmu-miR-30a; mmu-miR-141; mmu-miR-181a; mmu-miR-335-3p; mmu-miR-367; mmu-miR-291b-5p; mmu-miR-22; mmu-miR-30b; mmu-miR-193b; mmu-miR-25; mmu-miR-421; mmu-miR-1952; mmu-miR-142-5p
Arrdc4	2.432	68	27.9605	mmu-miR-200a; mmu-miR-145; mmu-miR-93; mmu-miR-130a; mmu-miR-19a; mmu-miR-130b; mmu-miR-20a; mmu-miR-30d; mmu-miR-291a-5p; mmu-miR-323-3p; mmu-miR-30a; mmu-miR-669o-5p; mmu-miR-21; mmu-miR-290-3p; mmu-miR-291b-5p; mmu-miR-132; mmu-miR-34a; mmu-miR-467a; mmu-miR-27a; mmu-miR-30b; mmu-miR-1198-5p; mmu-miR-191; mmu-miR-541; mmu-miR-106a; mmu-miR-17; mmu-miR-26b; mmu-miR-292-3p; mmu-miR-19b; mmu-miR-…
Asap1	2.59	63	24.3243	mmu-miR-495; mmu-miR-804; mmu-miR-713; mmu-miR-96; mmu-miR-466g; mmu-miR-19a; mmu-miR-674; mmu-miR-340-5p; mmu-miR-30d; mmu-miR-30a; mmu-miR-28; mmu-miR-434-3p; mmu-miR-205; mmu-miR-367; mmu-miR-27a; mmu-miR-30b; mmu-miR-1198-5p; mmu-miR-182; mmu-miR-103; mmu-miR-26b; mmu-miR-1952; mmu-miR-19b; mmu-miR-32; mmu-miR-433; mmu-miR-142-3p; mmu-miR-297c; mmu-miR-669l; mmu-miR-136; mmu-miR-125a-5p; mmu-…
Aspg	0.828	22	26.57	mmu-miR-195; mmu-miR-200a; mmu-miR-145; mmu-miR-16; mmu-miR-1198-3p; mmu-miR-150; mmu-miR-674; mmu-miR-28; mmu-miR-141; mmu-miR-330; mmu-miR-290-3p; mmu-miR-760-3p; mmu-miR-22; mmu-miR-467a; mmu-miR-15a; mmu-miR-103; mmu-miR-1224; mmu-miR-292-3p; mmu-miR-15b; mmu-miR-292-5p
Asph	4.216	80	18.9753	mmu-miR-495; mmu-miR-93; mmu-miR-804; mmu-miR-713; mmu-miR-96; mmu-miR-431; mmu-miR-20a; mmu-miR-340-5p; mmu-miR-466b-3p; mmu-miR-30d; mmu-miR-323-3p; mmu-miR-30a; mmu-miR-28; mmu-miR-21; mmu-miR-290-3p; mmu-miR-669f-3p; mmu-miR-106a; mmu-miR-17; mmu-miR-381; mmu-miR-292-3p; mmu-miR-154; mmu-miR-302a; mmu-miR-466a-3p; mmu-miR-195; mmu-miR-302d; mmu-miR-433; mmu-miR-124; mmu-miR-669l; mmu-miR-760-…
Atf3	1.186	24	20.2361	mmu-miR-124; mmu-miR-669l; mmu-miR-93; mmu-miR-335-5p; mmu-miR-431; mmu-miR-669f-5p; mmu-miR-20b; mmu-miR-20a; mmu-miR-377; mmu-miR-181a; mmu-miR-290-3p; mmu-miR-543; mmu-miR-669a-5p; mmu-miR-467a; mmu-miR-106b; mmu-miR-183; mmu-miR-106a; mmu-miR-468; mmu-miR-17; mmu-miR-672; mmu-miR-292-3p; mmu-miR-33
Atf7ip2	1.095	34	31.0502	mmu-miR-195; mmu-miR-200a; mmu-miR-495; mmu-miR-350; mmu-miR-1960; mmu-miR-148b; mmu-miR-124; mmu-miR-130a; mmu-miR-16; mmu-miR-431; mmu-miR-148a; mmu-miR-19a; mmu-miR-130b; mmu-miR-30d; mmu-miR-30a; mmu-miR-141; mmu-miR-152; mmu-miR-181a; mmu-miR-335-3p; mmu-miR-669f-3p; mmu-miR-543; mmu-miR-15a; mmu-miR-30b; mmu-miR-301a; mmu-miR-376b; mmu-miR-202-3p; mmu-miR-1224; mmu-miR-292-5p; mmu-miR-15b; …
Atp13a3	3.281	71	21.6397	mmu-miR-495; mmu-miR-29b; mmu-miR-145; mmu-miR-804; mmu-miR-713; mmu-miR-96; mmu-miR-200b; mmu-miR-466g; mmu-miR-431; mmu-miR-150; mmu-miR-466b-3p; mmu-miR-323-3p; mmu-miR-434-3p; mmu-miR-181a; mmu-miR-29c; mmu-miR-205; mmu-miR-669f-3p; mmu-miR-543; mmu-miR-34a; mmu-miR-1198-5p; mmu-miR-103; mmu-miR-182; mmu-miR-154; mmu-miR-195; mmu-miR-466a-3p; mmu-miR-1960; mmu-miR-350; mmu-miR-429; mmu-miR-87…
Atp1a1	0.337	6	17.8042	mmu-miR-29c; mmu-miR-29b; mmu-miR-29a; mmu-miR-26b; mmu-miR-26a; mmu-miR-191
Atp1a3	0.598	6	10.0334	mmu-miR-330; mmu-miR-760-3p; mmu-miR-291b-5p; mmu-miR-296-5p; mmu-miR-291a-5p; mmu-miR-423-5p
Atp6ap2	1.176	22	18.7075	mmu-miR-495; mmu-miR-1960; mmu-miR-148b; mmu-miR-374; mmu-miR-148a; mmu-miR-1198-3p; mmu-miR-19a; mmu-miR-369-3p; mmu-miR-467f; mmu-miR-762; mmu-miR-323-3p; mmu-miR-152; mmu-miR-669f-3p; mmu-miR-27a; mmu-miR-376b; mmu-miR-129-2-3p; mmu-miR-129-1-3p; mmu-miR-19b
Atp8a1	4.459	103	23.0993	mmu-miR-495; mmu-miR-145; mmu-miR-93; mmu-miR-804; mmu-miR-713; mmu-miR-96; mmu-miR-466g; mmu-miR-431; mmu-miR-19a; mmu-miR-20a; mmu-miR-340-5p; mmu-miR-466b-3p; mmu-miR-669f-3p; mmu-miR-468; mmu-miR-106a; mmu-miR-17; mmu-miR-202-3p; mmu-miR-381; mmu-miR-154; mmu-miR-669a-3p; mmu-miR-195; mmu-miR-433; mmu-miR-124; mmu-miR-148b; mmu-miR-136; mmu-miR-1198-3p; mmu-miR-148a; mmu-miR-20b; mmu-miR-23b;…
Atxn7l3	2.355	37	15.7113	mmu-miR-466a-3p; mmu-miR-495; mmu-miR-1960; mmu-miR-148b; mmu-miR-804; mmu-miR-96; mmu-miR-125a-5p; mmu-miR-760-5p; mmu-miR-148a; mmu-miR-1198-3p; mmu-miR-669d; mmu-miR-720; mmu-miR-125b-5p; mmu-miR-762; mmu-miR-30d; mmu-miR-296-5p; mmu-miR-741; mmu-miR-30a; mmu-miR-28; mmu-miR-152; mmu-miR-760-3p; mmu-miR-22; mmu-miR-378; mmu-miR-30b; mmu-miR-532-5p; mmu-miR-103; mmu-miR-182; mmu-miR-129-2-3p; m…
Avpr1a	1.093	32	29.2772	mmu-miR-466a-3p; mmu-miR-200a; mmu-miR-467e; mmu-miR-1960; mmu-miR-148b; mmu-miR-93; mmu-miR-148a; mmu-miR-20b; mmu-miR-674; mmu-miR-20a; mmu-miR-467f; mmu-miR-340-5p; mmu-miR-23b; mmu-miR-141; mmu-miR-152; mmu-miR-335-3p; mmu-miR-543; mmu-miR-382; mmu-miR-106b; mmu-miR-532-5p; mmu-miR-467h; mmu-miR-106a; mmu-miR-17; mmu-miR-142-5p; mmu-miR-1952; mmu-miR-23a; mmu-miR-292-5p
Axin2	1.388	30	21.6138	mmu-miR-466a-3p; mmu-miR-195; mmu-miR-495; mmu-miR-297c; mmu-miR-374; mmu-miR-16; mmu-miR-484; mmu-miR-467f; mmu-miR-762; mmu-miR-151-5p; mmu-miR-434-3p; mmu-miR-330; mmu-miR-155; mmu-miR-205; mmu-miR-760-3p; mmu-miR-15a; mmu-miR-103; mmu-miR-1935; mmu-miR-297a; mmu-miR-15b; mmu-miR-292-5p
B2m	0.448	9	20.0893	mmu-miR-669f-5p; mmu-miR-433; mmu-miR-182; mmu-miR-495; mmu-miR-669l; mmu-miR-669a-5p; mmu-miR-340-5p; mmu-miR-142-5p; mmu-miR-96
Bach1	3.475	93	26.7626	mmu-miR-495; mmu-miR-335-5p; mmu-miR-467c; mmu-miR-19a; mmu-miR-30d; mmu-miR-30a; mmu-miR-28; mmu-miR-434-3p; mmu-miR-290-3p; mmu-miR-155; mmu-miR-367; mmu-let-7a; mmu-miR-191; mmu-miR-202-3p; mmu-miR-381; mmu-miR-292-3p; mmu-miR-154; mmu-miR-302a; mmu-miR-669a-3p; mmu-miR-302d; mmu-let-7g; mmu-miR-124; mmu-miR-148b; mmu-miR-760-5p; mmu-miR-148a; mmu-miR-295; mmu-miR-23b; mmu-miR-377; mmu-miR-152…
Bak1	1.313	19	14.4707	mmu-miR-713; mmu-miR-431; mmu-miR-19a; mmu-miR-484; mmu-miR-150; mmu-miR-296-5p; mmu-miR-434-3p; mmu-miR-132; mmu-miR-376a; mmu-miR-378; mmu-miR-541; mmu-miR-129-2-3p; mmu-miR-1952; mmu-miR-1935; mmu-miR-129-1-3p; mmu-miR-19b
Basp1	0.944	6	6.35593	mmu-miR-541; mmu-miR-543; mmu-miR-329; mmu-miR-33; mmu-miR-142-5p; mmu-miR-136
BC022687	0.535	5	9.34579	mmu-miR-669d; mmu-miR-103; mmu-miR-760-3p; mmu-miR-421; mmu-miR-532-5p
BC030867	0.553	9	16.2749	mmu-miR-152; mmu-miR-148b; mmu-miR-713; mmu-miR-22; mmu-miR-27a; mmu-miR-431; mmu-miR-148a; mmu-miR-150; mmu-miR-1224
BC055324	0.542	18	33.2103	mmu-miR-1960; mmu-miR-124; mmu-miR-96; mmu-miR-431; mmu-miR-674; mmu-miR-18b; mmu-miR-377; mmu-miR-330; mmu-miR-34c; mmu-miR-335-3p; mmu-miR-134; mmu-miR-34a; mmu-miR-382; mmu-miR-182; mmu-miR-672; mmu-miR-292-5p
Bcam	0.483	7	14.4928	mmu-miR-141; mmu-miR-330; mmu-miR-200a; mmu-miR-150; mmu-miR-760-3p; mmu-miR-762; mmu-miR-378
Bcat1	6.428	100	15.5569	mmu-miR-495; mmu-miR-145; mmu-miR-804; mmu-miR-713; mmu-miR-335-5p; mmu-miR-96; mmu-miR-431; mmu-miR-340-5p; mmu-miR-323-3p; mmu-miR-434-3p; mmu-miR-21; mmu-miR-29c; mmu-miR-290-3p; mmu-miR-669f-3p; mmu-let-7a; mmu-miR-468; mmu-miR-672; mmu-miR-381; mmu-miR-292-3p; mmu-miR-466a-3p; mmu-let-7g; mmu-miR-124; mmu-miR-669l; mmu-miR-136; mmu-miR-760-5p; mmu-miR-669f-5p; mmu-miR-720; mmu-miR-23b; mmu-m…
Bcat2	0.366	10	27.3224	mmu-miR-32; mmu-miR-330; mmu-miR-367; mmu-miR-96; mmu-miR-378; mmu-miR-25; mmu-miR-103; mmu-miR-182; mmu-miR-363-3p
Bclaf1	2.444	60	24.5499	mmu-miR-200a; mmu-miR-495; mmu-miR-467e; mmu-miR-130a; mmu-miR-200b; mmu-miR-19a; mmu-miR-130b; mmu-miR-150; mmu-miR-674; mmu-miR-467f; mmu-miR-340-5p; mmu-miR-291a-5p; mmu-miR-323-3p; mmu-miR-181a; mmu-miR-669f-3p; mmu-miR-291b-5p; mmu-miR-132; mmu-miR-27a; mmu-miR-191; mmu-miR-1198-5p; mmu-miR-467h; mmu-miR-468; mmu-miR-103; mmu-miR-182; mmu-miR-421; mmu-miR-19b; mmu-miR-142-3p; mmu-miR-148b; m…
Bcr	2.594	54	20.8173	mmu-miR-200a; mmu-miR-145; mmu-miR-93; mmu-miR-335-5p; mmu-miR-96; mmu-miR-466g; mmu-miR-431; mmu-miR-20a; mmu-miR-291a-5p; mmu-miR-181a; mmu-miR-291b-5p; mmu-miR-669o-3p; mmu-miR-191; mmu-miR-541; mmu-miR-468; mmu-miR-106a; mmu-miR-17; mmu-miR-26b; mmu-miR-423-5p; mmu-miR-195; mmu-miR-669a-3p; mmu-miR-1960; mmu-miR-872; mmu-miR-16; mmu-miR-20b; mmu-miR-720; mmu-miR-18b; mmu-miR-762; mmu-miR-377;…
Bdnf	2.855	60	21.0158	mmu-miR-200a; mmu-miR-495; mmu-miR-145; mmu-miR-713; mmu-miR-466g; mmu-miR-431; mmu-miR-674; mmu-miR-467f; mmu-miR-30d; mmu-miR-30a; mmu-miR-434-3p; mmu-miR-669o-5p; mmu-miR-181a; mmu-miR-155; mmu-miR-669f-3p; mmu-miR-34a; mmu-miR-27a; mmu-miR-30b; mmu-miR-191; mmu-miR-468; mmu-miR-103; mmu-miR-182; mmu-miR-129-2-3p; mmu-miR-26b; mmu-miR-381; mmu-miR-154; mmu-miR-129-1-3p; mmu-miR-423-5p; mmu-miR…
Bhlhe40	1.593	32	20.0879	mmu-miR-195; mmu-miR-200a; mmu-miR-467e; mmu-miR-350; mmu-miR-804; mmu-miR-16; mmu-miR-669d; mmu-miR-19a; mmu-miR-484; mmu-miR-467f; mmu-miR-762; mmu-miR-291a-5p; mmu-miR-377; mmu-miR-141; mmu-miR-330; mmu-miR-181a; mmu-miR-21; mmu-miR-155; mmu-miR-543; mmu-miR-291b-5p; mmu-miR-15a; mmu-miR-467h; mmu-miR-1983; mmu-miR-1224; mmu-miR-26b; mmu-miR-421; mmu-miR-381; mmu-miR-26a; mmu-miR-292-5p; mmu-m…
Bicc1	2.413	51	21.1355	mmu-miR-200a; mmu-miR-29b; mmu-miR-93; mmu-miR-713; mmu-miR-335-5p; mmu-miR-96; mmu-miR-431; mmu-miR-674; mmu-miR-20a; mmu-miR-340-5p; mmu-miR-466b-3p; mmu-miR-291a-5p; mmu-miR-21; mmu-miR-29c; mmu-miR-290-3p; mmu-miR-291b-5p; mmu-miR-669o-3p; mmu-miR-126-3p; mmu-miR-467a; mmu-miR-1198-5p; mmu-miR-541; mmu-miR-468; mmu-miR-106a; mmu-miR-17; mmu-miR-292-3p; mmu-miR-154; mmu-miR-669a-3p; mmu-miR-19…
Blm	0.266	2	7.5188	mmu-miR-468; mmu-miR-142-3p
Bmf	3.801	50	13.1544	mmu-miR-200a; mmu-miR-467e; mmu-miR-713; mmu-miR-96; mmu-miR-431; mmu-miR-19a; mmu-miR-674; mmu-miR-369-3p; mmu-miR-28; mmu-miR-205; mmu-miR-27a; mmu-miR-467h; mmu-miR-541; mmu-miR-468; mmu-miR-26b; mmu-miR-19b; mmu-miR-466a-3p; mmu-miR-124; mmu-miR-1960; mmu-miR-297c; mmu-miR-350; mmu-miR-136; mmu-miR-374; mmu-miR-18b; mmu-miR-762; mmu-miR-151-5p; mmu-miR-141; mmu-miR-330; mmu-miR-760-3p; mmu-mi…
Bmi1	2.148	44	20.4842	mmu-miR-495; mmu-miR-713; mmu-miR-200b; mmu-miR-467c; mmu-miR-340-5p; mmu-miR-291a-5p; mmu-miR-290-3p; mmu-miR-669f-3p; mmu-miR-132; mmu-miR-291b-5p; mmu-miR-669o-3p; mmu-miR-467a; mmu-miR-27a; mmu-miR-182; mmu-miR-26b; mmu-miR-421; mmu-miR-381; mmu-miR-292-3p; mmu-miR-302a; mmu-miR-669a-3p; mmu-miR-302d; mmu-miR-350; mmu-miR-429; mmu-miR-669d; mmu-miR-295; mmu-miR-23b; mmu-miR-291b-3p; mmu-miR-3…
Bmp1	0.558	5	8.96057	mmu-miR-674; mmu-miR-329; mmu-miR-421; mmu-miR-760-5p
Bmp7	2.125	33	15.5294	mmu-miR-200a; mmu-miR-93; mmu-miR-760-5p; mmu-miR-466g; mmu-miR-669d; mmu-miR-484; mmu-miR-20b; mmu-miR-20a; mmu-miR-762; mmu-miR-30d; mmu-miR-30a; mmu-miR-151-5p; mmu-miR-141; mmu-miR-669o-5p; mmu-miR-205; mmu-miR-760-3p; mmu-miR-132; mmu-miR-134; mmu-miR-22; mmu-miR-27a; mmu-miR-30b; mmu-miR-106b; mmu-miR-193b; mmu-miR-106a; mmu-miR-103; mmu-miR-17; mmu-miR-1224; mmu-miR-202-3p; mmu-miR-672; mm…
Bmp8b	1.554	26	16.731	mmu-let-7g; mmu-miR-29b; mmu-miR-1198-3p; mmu-miR-669d; mmu-miR-484; mmu-miR-376c; mmu-let-7c; mmu-miR-741; mmu-miR-34c; mmu-miR-29a; mmu-miR-29c; mmu-miR-335-3p; mmu-let-7a; mmu-miR-134; mmu-miR-34a; mmu-miR-22; mmu-miR-382; mmu-miR-182; mmu-let-7e; mmu-miR-1224; mmu-miR-26b; mmu-miR-329; mmu-miR-33; mmu-miR-26a; mmu-miR-423-5p
Bmpr2	8.529	166	19.463	mmu-miR-495; mmu-miR-93; mmu-miR-466g; mmu-miR-19a; mmu-miR-20a; mmu-miR-340-5p; mmu-miR-323-3p; mmu-miR-21; mmu-miR-29c; mmu-miR-290-3p; mmu-miR-155; mmu-miR-669f-3p; mmu-miR-367; mmu-miR-191; mmu-miR-541; mmu-miR-468; mmu-miR-106a; mmu-miR-17; mmu-miR-129-2-3p; mmu-miR-381; mmu-miR-292-3p; mmu-miR-129-1-3p; mmu-miR-669a-3p; mmu-miR-466a-3p; mmu-miR-195; mmu-miR-433; mmu-miR-669l; mmu-miR-136; m…
Bnip3	1.079	13	12.0482	mmu-miR-466c-3p; mmu-miR-145; mmu-miR-132; mmu-miR-872; mmu-miR-374; mmu-miR-1198-5p; mmu-miR-1198-3p; mmu-miR-720; mmu-miR-376c; mmu-miR-466b-3p; mmu-miR-377
Bok	0.602	10	16.6113	mmu-miR-330; mmu-miR-27a; mmu-miR-466g; mmu-miR-541; mmu-miR-150; mmu-miR-1952; mmu-miR-467f; mmu-miR-296-5p; mmu-miR-762
Bsdc1	1.425	22	15.4386	mmu-miR-29b; mmu-miR-1960; mmu-miR-804; mmu-miR-335-5p; mmu-miR-96; mmu-miR-669d; mmu-miR-484; mmu-miR-150; mmu-miR-674; mmu-miR-21; mmu-miR-330; mmu-miR-155; mmu-miR-29a; mmu-miR-29c; mmu-miR-22; mmu-miR-293; mmu-miR-27a; mmu-miR-183; mmu-miR-541; mmu-miR-103; mmu-miR-329; mmu-miR-381
Bspry	0.705	14	19.8582	mmu-miR-195; mmu-miR-145; mmu-miR-804; mmu-miR-378; mmu-miR-15a; mmu-miR-16; mmu-miR-760-5p; mmu-miR-1224; mmu-miR-23b; mmu-miR-154; mmu-miR-15b; mmu-miR-23a; mmu-miR-423-5p; mmu-miR-101b
Btbd9	4.849	91	18.7668	mmu-miR-467e; mmu-miR-29b; mmu-miR-145; mmu-miR-804; mmu-miR-713; mmu-miR-431; mmu-miR-19a; mmu-miR-150; mmu-miR-669o-5p; mmu-miR-21; mmu-miR-29c; mmu-miR-205; mmu-miR-367; mmu-let-7a; mmu-miR-132; mmu-miR-34a; mmu-miR-1198-5p; mmu-miR-467h; mmu-miR-1983; mmu-miR-182; mmu-miR-103; mmu-miR-129-2-3p; mmu-miR-202-3p; mmu-miR-421; mmu-miR-381; mmu-miR-129-1-3p; mmu-miR-423-5p; mmu-miR-19b; mmu-miR-32…
Btg2	2.199	42	19.0996	mmu-miR-200a; mmu-miR-713; mmu-miR-335-5p; mmu-miR-200b; mmu-miR-19a; mmu-miR-369-3p; mmu-miR-467f; mmu-miR-340-5p; mmu-miR-30d; mmu-miR-296-5p; mmu-miR-30a; mmu-miR-28; mmu-miR-205; mmu-miR-30b; mmu-miR-541; mmu-miR-103; mmu-miR-672; mmu-miR-1952; mmu-miR-19b; mmu-miR-466a-3p; mmu-miR-124; mmu-miR-297c; mmu-miR-429; mmu-miR-872; mmu-miR-374; mmu-miR-1198-3p; mmu-miR-669d; mmu-miR-18b; mmu-miR-14…
Bub1	0.121	3	24.7934	mmu-miR-335-3p; mmu-miR-297c; mmu-miR-297a
Bub1b	0.272	5	18.3824	mmu-miR-495; mmu-miR-467e; mmu-miR-340-5p; mmu-miR-467h
C1qtnf3	1.475	18	12.2034	mmu-miR-141; mmu-miR-200a; mmu-miR-29c; mmu-miR-29b; mmu-miR-29a; mmu-miR-205; mmu-miR-335-5p; mmu-miR-872; mmu-miR-466g; mmu-miR-484; mmu-miR-26b; mmu-miR-421; mmu-miR-26a; mmu-miR-410
C330007P06Rik	2.557	54	21.1185	mmu-miR-200a; mmu-miR-495; mmu-miR-145; mmu-miR-96; mmu-miR-200b; mmu-miR-431; mmu-miR-150; mmu-miR-467f; mmu-miR-340-5p; mmu-miR-466b-3p; mmu-miR-28; mmu-miR-434-3p; mmu-miR-669o-5p; mmu-miR-21; mmu-miR-205; mmu-miR-669f-3p; mmu-miR-543; mmu-miR-367; mmu-let-7a; mmu-miR-132; mmu-miR-1198-5p; mmu-miR-468; mmu-miR-182; mmu-miR-1983; mmu-miR-423-5p; mmu-let-7g; mmu-miR-32; mmu-miR-429; mmu-miR-136;…
C77370	6.418	162	25.2415	mmu-miR-495; mmu-miR-145; mmu-miR-93; mmu-miR-804; mmu-miR-713; mmu-miR-466g; mmu-miR-431; mmu-miR-467c; mmu-miR-19a; mmu-miR-20a; mmu-miR-340-5p; mmu-miR-296-5p; mmu-miR-434-3p; mmu-miR-29c; mmu-miR-290-3p; mmu-miR-155; mmu-miR-669f-3p; mmu-miR-541; mmu-miR-468; mmu-miR-106a; mmu-miR-17; mmu-miR-292-3p; mmu-miR-302a; mmu-miR-669a-3p; mmu-miR-466a-3p; mmu-miR-302d; mmu-miR-433; mmu-miR-124; mmu-m…
Cachd1	1.444	25	17.313	mmu-miR-669a-3p; mmu-miR-433; mmu-miR-142-3p; mmu-miR-350; mmu-miR-145; mmu-miR-374; mmu-miR-466g; mmu-miR-19a; mmu-miR-484; mmu-miR-369-3p; mmu-miR-467f; mmu-miR-18b; mmu-miR-101b; mmu-miR-1945; mmu-miR-205; mmu-miR-669o-3p; mmu-miR-376a; mmu-miR-1224; mmu-miR-329; mmu-miR-19b; mmu-miR-410
Cacna2d1	3.837	120	31.2744	mmu-miR-495; mmu-miR-93; mmu-miR-713; mmu-miR-335-5p; mmu-miR-96; mmu-miR-466g; mmu-miR-20a; mmu-miR-340-5p; mmu-miR-323-3p; mmu-miR-434-3p; mmu-miR-21; mmu-miR-155; mmu-miR-367; mmu-miR-106a; mmu-miR-17; mmu-miR-381; mmu-miR-154; mmu-miR-195; mmu-miR-433; mmu-miR-124; mmu-miR-669l; mmu-miR-669f-5p; mmu-miR-20b; mmu-miR-720; mmu-miR-23b; mmu-miR-377; mmu-miR-1196; mmu-miR-34c; mmu-miR-330; mmu-mi…
Calca	0.45	21	46.6667	mmu-miR-302d; mmu-miR-200a; mmu-miR-297c; mmu-miR-669l; mmu-miR-467c; mmu-miR-669f-5p; mmu-miR-295; mmu-miR-28; mmu-miR-141; mmu-miR-291b-3p; mmu-miR-290-3p; mmu-miR-134; mmu-miR-669a-5p; mmu-miR-382; mmu-miR-467a; mmu-miR-291a-3p; mmu-miR-292-3p; mmu-miR-297a; mmu-miR-302a; mmu-miR-294
Calcoco2	0.588	7	11.9048	mmu-miR-32; mmu-miR-25; mmu-miR-363-3p; mmu-miR-181a; mmu-miR-297c; mmu-miR-367; mmu-miR-297a
Calcrl	2.828	51	18.0339	mmu-miR-200a; mmu-miR-495; mmu-miR-467e; mmu-miR-93; mmu-miR-804; mmu-miR-713; mmu-miR-200b; mmu-miR-466g; mmu-miR-369-3p; mmu-miR-20a; mmu-miR-340-5p; mmu-miR-434-3p; mmu-miR-290-3p; mmu-miR-155; mmu-miR-467a; mmu-miR-467h; mmu-miR-106a; mmu-miR-103; mmu-miR-17; mmu-miR-26b; mmu-miR-381; mmu-miR-292-3p; mmu-miR-154; mmu-miR-302a; mmu-miR-302d; mmu-miR-350; mmu-miR-429; mmu-miR-760-5p; mmu-miR-20…
Cald1	2.327	52	22.3464	mmu-miR-467e; mmu-miR-93; mmu-miR-804; mmu-miR-369-3p; mmu-miR-20a; mmu-miR-340-5p; mmu-miR-466b-3p; mmu-miR-434-3p; mmu-miR-669o-5p; mmu-miR-181a; mmu-miR-669f-3p; mmu-miR-367; mmu-let-7a; mmu-miR-132; mmu-miR-27a; mmu-miR-467h; mmu-miR-106a; mmu-miR-182; mmu-miR-129-2-3p; mmu-miR-17; mmu-miR-202-3p; mmu-miR-129-1-3p; mmu-miR-466a-3p; mmu-let-7g; mmu-miR-32; mmu-miR-350; mmu-miR-374; mmu-miR-760…
Camkv	1.351	27	19.9852	mmu-miR-195; mmu-miR-200a; mmu-miR-335-5p; mmu-miR-16; mmu-miR-125a-5p; mmu-miR-760-5p; mmu-miR-1198-3p; mmu-miR-484; mmu-miR-150; mmu-miR-23b; mmu-miR-125b-5p; mmu-miR-762; mmu-miR-141; mmu-miR-669f-3p; mmu-miR-15a; mmu-miR-183; mmu-miR-103; mmu-miR-329; mmu-miR-672; mmu-miR-15b; mmu-miR-23a
Caprin1	3.858	89	23.0689	mmu-miR-145; mmu-miR-804; mmu-miR-335-5p; mmu-miR-467c; mmu-miR-30d; mmu-miR-323-3p; mmu-miR-30a; mmu-miR-21; mmu-miR-290-3p; mmu-miR-669f-3p; mmu-miR-468; mmu-miR-292-3p; mmu-miR-302a; mmu-miR-669a-3p; mmu-miR-466a-3p; mmu-miR-302d; mmu-miR-195; mmu-miR-669l; mmu-miR-136; mmu-miR-125a-5p; mmu-miR-1198-3p; mmu-miR-669f-5p; mmu-miR-295; mmu-miR-125b-5p; mmu-miR-377; mmu-miR-1196; mmu-miR-335-3p; m…
Car14	0.378	2	5.29101	mmu-miR-1983; mmu-miR-467f
Car2	0.68	20	29.4118	mmu-miR-433; mmu-miR-495; mmu-miR-350; mmu-miR-669l; mmu-miR-374; mmu-miR-431; mmu-miR-669f-5p; mmu-miR-23b; mmu-miR-323-3p; mmu-miR-181a; mmu-miR-205; mmu-miR-543; mmu-miR-669a-5p; mmu-miR-382; mmu-miR-193b; mmu-miR-468; mmu-miR-33; mmu-miR-1935; mmu-miR-23a; mmu-miR-410
Car4	0.334	14	41.9162	mmu-miR-152; mmu-miR-148b; mmu-miR-429; mmu-miR-126-3p; mmu-miR-136; mmu-miR-200b; mmu-miR-148a; mmu-miR-669d; mmu-miR-1983; mmu-miR-129-2-3p; mmu-miR-150; mmu-miR-200c; mmu-miR-1952; mmu-miR-129-1-3p
Casp6	0.53	13	24.5283	mmu-miR-495; mmu-miR-350; mmu-miR-30b; mmu-miR-183; mmu-miR-129-2-3p; mmu-miR-467f; mmu-miR-340-5p; mmu-miR-142-5p; mmu-miR-129-1-3p; mmu-miR-30d; mmu-miR-323-3p; mmu-miR-101b; mmu-miR-30a
Cast	0.556	8	14.3885	mmu-miR-141; mmu-miR-200a; mmu-miR-155; mmu-miR-669f-3p; mmu-miR-378; mmu-miR-1983; mmu-miR-150; mmu-miR-674
Cav1	1.998	52	26.026	mmu-miR-93; mmu-miR-96; mmu-miR-130a; mmu-miR-466g; mmu-miR-431; mmu-miR-130b; mmu-miR-20a; mmu-miR-340-5p; mmu-miR-291a-5p; mmu-miR-323-3p; mmu-miR-21; mmu-miR-205; mmu-miR-543; mmu-miR-367; mmu-miR-291b-5p; mmu-miR-34a; mmu-miR-27a; mmu-miR-106a; mmu-miR-103; mmu-miR-17; mmu-miR-672; mmu-miR-421; mmu-miR-423-5p; mmu-miR-195; mmu-miR-32; mmu-miR-124; mmu-miR-297c; mmu-miR-16; mmu-miR-363-3p; mmu…
Cav2	2.068	49	23.6944	mmu-miR-200a; mmu-miR-29b; mmu-miR-804; mmu-miR-369-3p; mmu-miR-340-5p; mmu-miR-30d; mmu-miR-323-3p; mmu-miR-30a; mmu-miR-21; mmu-miR-29c; mmu-miR-669f-3p; mmu-miR-543; mmu-miR-132; mmu-miR-27a; mmu-miR-30b; mmu-miR-468; mmu-miR-381; mmu-miR-195; mmu-miR-433; mmu-miR-297c; mmu-miR-16; mmu-miR-374; mmu-miR-1198-3p; mmu-miR-23b; mmu-miR-101b; mmu-miR-141; mmu-miR-29a; mmu-miR-15a; mmu-miR-378; mmu-…
Cbfb	2.055	52	25.3041	mmu-miR-495; mmu-miR-145; mmu-miR-713; mmu-miR-130a; mmu-miR-200b; mmu-miR-466g; mmu-miR-19a; mmu-miR-130b; mmu-miR-674; mmu-miR-369-3p; mmu-miR-466b-3p; mmu-miR-30d; mmu-miR-30a; mmu-miR-669f-3p; mmu-miR-543; mmu-miR-34a; mmu-miR-27a; mmu-miR-30b; mmu-miR-1983; mmu-miR-26b; mmu-miR-381; mmu-miR-19b; mmu-miR-433; mmu-miR-124; mmu-miR-148b; mmu-miR-429; mmu-miR-125a-5p; mmu-miR-374; mmu-miR-148a; …
Cblc	0.144	4	27.7778	mmu-miR-669o-5p; mmu-miR-335-5p; mmu-miR-762; mmu-miR-378
Cbr3	0.226	4	17.6991	mmu-miR-291b-5p; mmu-miR-291a-5p
Cbx4	3.319	43	12.9557	mmu-miR-145; mmu-miR-804; mmu-miR-335-5p; mmu-miR-431; mmu-miR-19a; mmu-miR-340-5p; mmu-miR-205; mmu-let-7a; mmu-miR-34a; mmu-miR-103; mmu-miR-202-3p; mmu-miR-672; mmu-miR-381; mmu-miR-302a; mmu-miR-423-5p; mmu-miR-19b; mmu-let-7g; mmu-miR-302d; mmu-miR-433; mmu-miR-125a-5p; mmu-miR-760-5p; mmu-miR-484; mmu-miR-295; mmu-miR-18b; mmu-miR-125b-5p; mmu-miR-762; mmu-let-7c; mmu-miR-34c; mmu-miR-760-3…
Cbx7	2.509	33	13.1527	mmu-miR-195; mmu-miR-1960; mmu-miR-148b; mmu-miR-96; mmu-miR-16; mmu-miR-760-5p; mmu-miR-148a; mmu-miR-19a; mmu-miR-484; mmu-miR-467f; mmu-miR-340-5p; mmu-miR-23b; mmu-miR-18b; mmu-miR-762; mmu-miR-377; mmu-miR-323-3p; mmu-miR-152; mmu-miR-22; mmu-miR-27a; mmu-miR-15a; mmu-miR-423-3p; mmu-miR-193b; mmu-miR-182; mmu-miR-329; mmu-miR-1224; mmu-miR-672; mmu-miR-1952; mmu-miR-1935; mmu-miR-15b; mmu-m…
Ccdc68	0.449	16	35.6347	mmu-miR-466c-3p; mmu-miR-466a-3p; mmu-miR-1196; mmu-miR-669f-3p; mmu-miR-291b-5p; mmu-miR-429; mmu-miR-200b; mmu-miR-193b; mmu-miR-200c; mmu-miR-467f; mmu-miR-381; mmu-miR-466b-3p; mmu-miR-291a-5p; mmu-miR-410
Ccnb1	1.028	38	36.965	mmu-miR-495; mmu-miR-145; mmu-miR-96; mmu-miR-431; mmu-miR-150; mmu-miR-467f; mmu-miR-466b-3p; mmu-miR-21; mmu-miR-205; mmu-miR-669f-3p; mmu-miR-367; mmu-miR-132; mmu-miR-191; mmu-miR-26b; mmu-miR-421; mmu-miR-32; mmu-miR-466a-3p; mmu-miR-148b; mmu-miR-1960; mmu-miR-350; mmu-miR-148a; mmu-miR-363-3p; mmu-miR-376c; mmu-miR-291b-3p; mmu-miR-1196; mmu-miR-466c-3p; mmu-miR-152; mmu-miR-134; mmu-miR-2…
Ccnb1ip1	0.564	17	30.1418	mmu-miR-433; mmu-miR-21; mmu-miR-335-3p; mmu-miR-132; mmu-miR-125a-5p; mmu-miR-19a; mmu-miR-376b; mmu-miR-33; mmu-miR-23b; mmu-miR-125b-5p; mmu-miR-142-5p; mmu-miR-23a; mmu-miR-377; mmu-miR-19b
Ccnb2	0.23	7	30.4348	mmu-miR-350; mmu-miR-297c; mmu-miR-378; mmu-miR-297a; mmu-miR-292-5p
Ccnc	2.452	41	16.721	mmu-miR-467e; mmu-miR-145; mmu-miR-335-5p; mmu-miR-466g; mmu-miR-19a; mmu-miR-340-5p; mmu-miR-323-3p; mmu-miR-669f-3p; mmu-miR-543; mmu-miR-367; mmu-miR-27a; mmu-miR-1198-5p; mmu-miR-467h; mmu-miR-421; mmu-miR-381; mmu-miR-19b; mmu-miR-32; mmu-miR-466a-3p; mmu-miR-433; mmu-miR-297c; mmu-miR-350; mmu-miR-1198-3p; mmu-miR-760-5p; mmu-miR-363-3p; mmu-miR-18b; mmu-miR-762; mmu-miR-101b; mmu-miR-335-3…
Ccnd1	2.676	49	18.3109	mmu-miR-29b; mmu-miR-96; mmu-miR-466g; mmu-miR-296-5p; mmu-miR-29c; mmu-miR-205; mmu-miR-34a; mmu-miR-27a; mmu-miR-541; mmu-miR-182; mmu-miR-26b; mmu-miR-672; mmu-miR-423-5p; mmu-miR-148b; mmu-miR-1960; mmu-miR-350; mmu-miR-669l; mmu-miR-125a-5p; mmu-miR-760-5p; mmu-miR-1198-3p; mmu-miR-148a; mmu-miR-669f-5p; mmu-miR-125b-5p; mmu-miR-720; mmu-miR-762; mmu-miR-741; mmu-miR-377; mmu-miR-152; mmu-mi…
Ccnd2	4.556	104	22.827	mmu-miR-145; mmu-miR-93; mmu-miR-804; mmu-miR-431; mmu-miR-19a; mmu-miR-20a; mmu-miR-340-5p; mmu-miR-466b-3p; mmu-miR-30d; mmu-miR-30a; mmu-miR-28; mmu-miR-434-3p; mmu-miR-29c; mmu-miR-290-3p; mmu-let-7a; mmu-miR-468; mmu-miR-106a; mmu-miR-17; mmu-miR-672; mmu-miR-292-3p; mmu-miR-154; mmu-miR-302a; mmu-miR-466a-3p; mmu-miR-302d; mmu-let-7g; mmu-miR-195; mmu-miR-148b; mmu-miR-136; mmu-miR-760-5p; …
Ccne2	1.681	58	34.5033	mmu-miR-200a; mmu-miR-495; mmu-miR-93; mmu-miR-335-5p; mmu-miR-19a; mmu-miR-150; mmu-miR-369-3p; mmu-miR-20a; mmu-miR-467f; mmu-miR-340-5p; mmu-miR-30d; mmu-miR-291a-5p; mmu-miR-30a; mmu-miR-21; mmu-miR-669f-3p; mmu-miR-367; mmu-miR-291b-5p; mmu-miR-34a; mmu-miR-30b; mmu-miR-1198-5p; mmu-miR-106a; mmu-miR-17; mmu-miR-26b; mmu-miR-381; mmu-miR-19b; mmu-miR-466a-3p; mmu-miR-32; mmu-miR-148b; mmu-mi…
Ccno	0.721	16	22.1914	mmu-miR-195; mmu-miR-124; mmu-miR-22; mmu-miR-27a; mmu-miR-15a; mmu-miR-130a; mmu-miR-374; mmu-miR-301a; mmu-miR-16; mmu-miR-669d; mmu-miR-103; mmu-miR-130b; mmu-miR-369-3p; mmu-miR-15b; mmu-miR-28; mmu-miR-101b
Ccnyl1	2.005	40	19.9501	mmu-miR-200a; mmu-miR-467e; mmu-miR-29b; mmu-miR-804; mmu-miR-713; mmu-miR-335-5p; mmu-miR-200b; mmu-miR-19a; mmu-miR-150; mmu-miR-674; mmu-miR-291a-5p; mmu-miR-323-3p; mmu-miR-669o-5p; mmu-miR-29c; mmu-miR-291b-5p; mmu-miR-27a; mmu-miR-467h; mmu-miR-103; mmu-miR-1983; mmu-miR-19b; mmu-miR-195; mmu-miR-433; mmu-miR-124; mmu-miR-350; mmu-miR-429; mmu-miR-16; mmu-miR-741; mmu-miR-141; mmu-miR-1945;…
Cd109	1.195	26	21.7573	mmu-miR-302d; mmu-miR-195; mmu-miR-467e; mmu-miR-16; mmu-miR-467c; mmu-miR-674; mmu-miR-295; mmu-miR-340-5p; mmu-miR-466b-3p; mmu-miR-466c-3p; mmu-miR-291b-3p; mmu-miR-181a; mmu-miR-290-3p; mmu-miR-543; mmu-miR-467a; mmu-miR-15a; mmu-miR-467h; mmu-miR-103; mmu-miR-291a-3p; mmu-miR-421; mmu-miR-142-5p; mmu-miR-292-3p; mmu-miR-15b; mmu-miR-302a; mmu-miR-294
Cd14	0.226	1	4.42478	mmu-miR-350
Cd302	0.299	6	20.0669	mmu-miR-669d; mmu-miR-19a; mmu-miR-335-3p; mmu-miR-19b
Cd34	1.485	40	26.936	mmu-miR-96; mmu-miR-431; mmu-miR-340-5p; mmu-miR-296-5p; mmu-miR-434-3p; mmu-miR-181a; mmu-miR-21; mmu-let-7a; mmu-miR-27a; mmu-miR-103; mmu-miR-182; mmu-miR-129-2-3p; mmu-miR-202-3p; mmu-miR-1952; mmu-miR-129-1-3p; mmu-miR-302a; mmu-let-7g; mmu-miR-302d; mmu-miR-124; mmu-miR-297c; mmu-miR-350; mmu-miR-125a-5p; mmu-miR-295; mmu-miR-125b-5p; mmu-miR-23b; mmu-miR-376c; mmu-let-7c; mmu-miR-330; mmu-…
Cd3e	0.788	18	22.8426	mmu-miR-1960; mmu-miR-93; mmu-miR-96; mmu-miR-136; mmu-miR-484; mmu-miR-20b; mmu-miR-20a; mmu-miR-330; mmu-miR-335-3p; mmu-miR-378; mmu-miR-106b; mmu-miR-106a; mmu-miR-17; mmu-miR-129-2-3p; mmu-miR-142-5p; mmu-miR-421; mmu-miR-129-1-3p
Cd40	2.035	32	15.7248	mmu-miR-466a-3p; mmu-miR-195; mmu-miR-148b; mmu-miR-713; mmu-miR-374; mmu-miR-16; mmu-miR-466g; mmu-miR-431; mmu-miR-148a; mmu-miR-369-3p; mmu-miR-720; mmu-miR-762; mmu-miR-466b-3p; mmu-miR-487b; mmu-miR-28; mmu-miR-466c-3p; mmu-miR-152; mmu-miR-330; mmu-miR-760-3p; mmu-miR-22; mmu-miR-382; mmu-miR-15a; mmu-miR-1198-5p; mmu-miR-129-2-3p; mmu-miR-129-1-3p; mmu-miR-15b; mmu-miR-292-5p; mmu-miR-410
Cd44	2.992	64	21.3904	mmu-miR-145; mmu-miR-93; mmu-miR-200b; mmu-miR-369-3p; mmu-miR-20a; mmu-miR-466b-3p; mmu-miR-30d; mmu-miR-291a-5p; mmu-miR-323-3p; mmu-miR-30a; mmu-miR-28; mmu-miR-434-3p; mmu-miR-205; mmu-miR-291b-5p; mmu-miR-669o-3p; mmu-miR-30b; mmu-miR-1198-5p; mmu-miR-541; mmu-miR-468; mmu-miR-106a; mmu-miR-103; mmu-miR-1983; mmu-miR-129-2-3p; mmu-miR-17; mmu-miR-381; mmu-miR-154; mmu-miR-1952; mmu-miR-129-1…
Cd47	4.133	94	22.7438	mmu-miR-145; mmu-miR-804; mmu-miR-713; mmu-miR-96; mmu-miR-466g; mmu-miR-431; mmu-miR-467c; mmu-miR-19a; mmu-miR-340-5p; mmu-miR-28; mmu-miR-21; mmu-miR-29c; mmu-miR-290-3p; mmu-miR-155; mmu-miR-669f-3p; mmu-miR-468; mmu-miR-292-3p; mmu-miR-302a; mmu-miR-466a-3p; mmu-miR-302d; mmu-miR-195; mmu-miR-148b; mmu-miR-760-5p; mmu-miR-1198-3p; mmu-miR-148a; mmu-miR-295; mmu-miR-1196; mmu-miR-34c; mmu-miR…
Cd55	1.285	26	20.2335	mmu-miR-433; mmu-miR-495; mmu-miR-350; mmu-miR-429; mmu-miR-374; mmu-miR-200b; mmu-miR-369-3p; mmu-miR-340-5p; mmu-miR-30d; mmu-miR-487b; mmu-miR-30a; mmu-miR-434-3p; mmu-miR-21; mmu-miR-27a; mmu-miR-1198-5p; mmu-miR-30b; mmu-miR-183; mmu-miR-376b; mmu-miR-200c; mmu-miR-142-5p; mmu-miR-410
Cd59a	1.174	19	16.184	mmu-miR-195; mmu-miR-16; mmu-miR-125a-5p; mmu-miR-1198-3p; mmu-miR-125b-5p; mmu-miR-762; mmu-miR-377; mmu-miR-669o-5p; mmu-miR-181a; mmu-miR-543; mmu-miR-132; mmu-miR-15a; mmu-miR-382; mmu-miR-103; mmu-miR-26b; mmu-miR-329; mmu-miR-26a; mmu-miR-15b; mmu-miR-410
Cdc42	1.407	21	14.9254	mmu-miR-32; mmu-miR-433; mmu-miR-142-3p; mmu-miR-495; mmu-miR-467e; mmu-miR-350; mmu-miR-145; mmu-miR-669d; mmu-miR-363-3p; mmu-miR-434-3p; mmu-miR-134; mmu-miR-367; mmu-miR-467h; mmu-miR-25; mmu-miR-129-2-3p; mmu-miR-1952; mmu-miR-129-1-3p
Cdc42ep3	0.7	4	5.71429	mmu-miR-182; mmu-miR-421; mmu-miR-96; mmu-miR-762
Cdc42ep4	1.664	29	17.4279	mmu-miR-302d; mmu-miR-200a; mmu-miR-466g; mmu-miR-669d; mmu-miR-674; mmu-miR-295; mmu-miR-762; mmu-miR-296-5p; mmu-miR-323-3p; mmu-miR-1196; mmu-miR-141; mmu-miR-34c; mmu-miR-330; mmu-miR-127; mmu-miR-760-3p; mmu-miR-134; mmu-miR-34a; mmu-miR-541; mmu-miR-1983; mmu-miR-103; mmu-miR-291a-3p; mmu-miR-329; mmu-miR-302a; mmu-miR-294
Cdc42ep5	0.075	2	26.6667	mmu-miR-672; mmu-miR-760-5p
Cdc6	3.169	44	13.8845	mmu-miR-200a; mmu-miR-495; mmu-miR-150; mmu-miR-674; mmu-miR-466b-3p; mmu-miR-669o-5p; mmu-miR-290-3p; mmu-miR-669f-3p; mmu-miR-132; mmu-miR-34a; mmu-miR-467a; mmu-miR-103; mmu-miR-1983; mmu-miR-292-3p; mmu-miR-423-5p; mmu-miR-195; mmu-miR-466a-3p; mmu-miR-350; mmu-miR-125a-5p; mmu-miR-16; mmu-miR-760-5p; mmu-miR-669d; mmu-miR-125b-5p; mmu-miR-741; mmu-miR-141; mmu-miR-466c-3p; mmu-miR-34c; mmu-m…
Cdca2	0.529	17	32.1361	mmu-miR-32; mmu-miR-467e; mmu-miR-1960; mmu-miR-148b; mmu-miR-148a; mmu-miR-363-3p; mmu-miR-762; mmu-miR-296-5p; mmu-miR-323-3p; mmu-miR-152; mmu-miR-367; mmu-miR-760-3p; mmu-miR-1198-5p; mmu-miR-467h; mmu-miR-25; mmu-miR-33; mmu-miR-292-5p
Cdca3	0.561	10	17.8253	mmu-miR-330; mmu-miR-669f-3p; mmu-miR-291b-5p; mmu-miR-1198-3p; mmu-miR-329; mmu-miR-467f; mmu-miR-1935; mmu-miR-291a-5p; mmu-miR-741; mmu-miR-410
Cdca5	1.049	21	20.0191	mmu-miR-195; mmu-let-7g; mmu-miR-16; mmu-miR-760-5p; mmu-miR-340-5p; mmu-let-7c; mmu-miR-741; mmu-miR-28; mmu-let-7a; mmu-miR-15a; mmu-miR-378; mmu-let-7e; mmu-miR-1224; mmu-miR-142-5p; mmu-miR-421; mmu-miR-15b; mmu-miR-410
Cdca7	1.143	39	34.1207	mmu-miR-29b; mmu-miR-145; mmu-miR-93; mmu-miR-466g; mmu-miR-674; mmu-miR-20a; mmu-miR-30d; mmu-miR-30a; mmu-miR-29c; mmu-miR-30b; mmu-miR-106a; mmu-miR-17; mmu-miR-302a; mmu-miR-195; mmu-miR-302d; mmu-miR-433; mmu-miR-124; mmu-miR-350; mmu-miR-16; mmu-miR-20b; mmu-miR-484; mmu-miR-295; mmu-miR-377; mmu-miR-29a; mmu-miR-134; mmu-miR-22; mmu-miR-15a; mmu-miR-106b; mmu-miR-532-5p; mmu-miR-291a-3p; m…
Cdcp1	2.679	52	19.4102	mmu-miR-145; mmu-miR-93; mmu-miR-200b; mmu-miR-466g; mmu-miR-431; mmu-miR-150; mmu-miR-674; mmu-miR-20a; mmu-miR-340-5p; mmu-miR-28; mmu-miR-21; mmu-miR-290-3p; mmu-miR-467a; mmu-miR-106a; mmu-miR-103; mmu-miR-1983; mmu-miR-17; mmu-miR-26b; mmu-miR-672; mmu-miR-292-3p; mmu-miR-433; mmu-miR-297c; mmu-miR-669l; mmu-miR-429; mmu-miR-760-5p; mmu-miR-669d; mmu-miR-669f-5p; mmu-miR-20b; mmu-miR-18b; mm…
Cdh1	1.631	33	20.233	mmu-miR-495; mmu-miR-467e; mmu-miR-145; mmu-miR-124; mmu-miR-669l; mmu-miR-335-5p; mmu-miR-669d; mmu-miR-669f-5p; mmu-miR-150; mmu-miR-466b-3p; mmu-miR-291a-5p; mmu-miR-323-3p; mmu-miR-28; mmu-miR-466c-3p; mmu-miR-330; mmu-miR-291b-5p; mmu-miR-669a-5p; mmu-miR-27a; mmu-miR-467h; mmu-miR-183; mmu-miR-1983; mmu-miR-103; mmu-miR-329; mmu-miR-33; mmu-miR-421; mmu-miR-292-5p; mmu-miR-423-5p
Cdh11	1.319	29	21.9864	mmu-miR-466a-3p; mmu-miR-433; mmu-miR-142-3p; mmu-miR-297c; mmu-miR-429; mmu-miR-96; mmu-miR-374; mmu-miR-200b; mmu-miR-466g; mmu-miR-431; mmu-miR-369-3p; mmu-miR-466b-3p; mmu-miR-30d; mmu-miR-291a-5p; mmu-miR-741; mmu-miR-30a; mmu-miR-466c-3p; mmu-miR-543; mmu-miR-291b-5p; mmu-miR-382; mmu-miR-1198-5p; mmu-miR-30b; mmu-miR-200c; mmu-miR-1224; mmu-miR-297a; mmu-miR-410
Cdh13	1.519	36	23.6998	mmu-miR-495; mmu-miR-200b; mmu-miR-467f; mmu-miR-466b-3p; mmu-miR-30d; mmu-miR-291a-5p; mmu-miR-30a; mmu-miR-181a; mmu-miR-543; mmu-let-7a; mmu-miR-291b-5p; mmu-miR-34a; mmu-miR-30b; mmu-miR-129-2-3p; mmu-miR-202-3p; mmu-miR-381; mmu-miR-129-1-3p; mmu-miR-423-5p; mmu-let-7g; mmu-miR-429; mmu-miR-872; mmu-let-7c; mmu-miR-151-5p; mmu-miR-466c-3p; mmu-miR-34c; mmu-miR-760-3p; mmu-miR-378; mmu-miR-18…
Cdh2	1.27	22	17.3228	mmu-miR-29b; mmu-miR-297c; mmu-miR-669l; mmu-miR-429; mmu-miR-200b; mmu-miR-669f-5p; mmu-miR-466b-3p; mmu-miR-323-3p; mmu-miR-101b; mmu-miR-466c-3p; mmu-miR-29a; mmu-miR-29c; mmu-miR-335-3p; mmu-miR-669a-5p; mmu-miR-193b; mmu-miR-1983; mmu-miR-200c; mmu-miR-329; mmu-miR-297a
Cdk5r2	1.525	20	13.1148	mmu-let-7g; mmu-miR-93; mmu-miR-96; mmu-miR-872; mmu-miR-466g; mmu-miR-484; mmu-miR-20b; mmu-miR-20a; mmu-let-7c; mmu-let-7a; mmu-miR-132; mmu-miR-106b; mmu-miR-106a; mmu-let-7e; mmu-miR-129-2-3p; mmu-miR-17; mmu-miR-1952; mmu-miR-129-1-3p; mmu-miR-410; mmu-miR-423-5p
Cdk6	10.217	216	21.1412	mmu-miR-495; mmu-miR-145; mmu-miR-804; mmu-miR-713; mmu-miR-335-5p; mmu-miR-96; mmu-miR-466g; mmu-miR-467c; mmu-miR-19a; mmu-miR-466b-3p; mmu-miR-323-3p; mmu-miR-434-3p; mmu-miR-21; mmu-miR-29c; mmu-miR-290-3p; mmu-miR-669f-3p; mmu-miR-367; mmu-let-7a; mmu-miR-191; mmu-miR-468; mmu-miR-129-2-3p; mmu-miR-202-3p; mmu-miR-672; mmu-miR-381; mmu-miR-292-3p; mmu-miR-154; mmu-miR-129-1-3p; mmu-miR-302a;…
Cdk9	1.158	24	20.7254	mmu-miR-195; mmu-miR-29b; mmu-miR-335-5p; mmu-miR-872; mmu-miR-16; mmu-miR-762; mmu-miR-434-3p; mmu-miR-330; mmu-miR-29a; mmu-miR-29c; mmu-miR-15a; mmu-miR-378; mmu-miR-423-3p; mmu-miR-193b; mmu-miR-103; mmu-miR-129-2-3p; mmu-miR-1224; mmu-miR-154; mmu-miR-129-1-3p; mmu-miR-1935; mmu-miR-15b
Cdkn2a	0.264	2	7.57576	mmu-miR-466a-3p; mmu-miR-155
Cdkn2b	0.765	9	11.7647	mmu-miR-434-3p; mmu-miR-142-3p; mmu-miR-297c; mmu-miR-132; mmu-miR-713; mmu-miR-872; mmu-miR-1983; mmu-miR-1952; mmu-miR-297a
Cdo1	0.727	14	19.2572	mmu-miR-335-3p; mmu-miR-297c; mmu-miR-145; mmu-miR-22; mmu-miR-125a-5p; mmu-miR-129-2-3p; mmu-miR-672; mmu-miR-125b-5p; mmu-miR-129-1-3p; mmu-miR-297a; mmu-miR-292-5p; mmu-miR-466f
Cds2	6.765	166	24.5381	mmu-miR-495; mmu-miR-93; mmu-miR-804; mmu-miR-713; mmu-miR-335-5p; mmu-miR-466g; mmu-miR-467c; mmu-miR-20a; mmu-miR-340-5p; mmu-miR-296-5p; mmu-miR-28; mmu-miR-290-3p; mmu-miR-669f-3p; mmu-miR-541; mmu-miR-468; mmu-miR-106a; mmu-miR-17; mmu-miR-129-2-3p; mmu-miR-381; mmu-miR-292-3p; mmu-miR-154; mmu-miR-129-1-3p; mmu-miR-302a; mmu-miR-302d; mmu-miR-195; mmu-miR-148b; mmu-miR-669l; mmu-miR-136; mm…
Cdx2	1.037	11	10.6075	mmu-miR-330; mmu-miR-297c; mmu-miR-382; mmu-miR-378; mmu-miR-1224; mmu-miR-674; mmu-miR-1952; mmu-miR-297a
Cdyl2	6.405	125	19.516	mmu-miR-495; mmu-miR-145; mmu-miR-804; mmu-miR-713; mmu-miR-431; mmu-miR-467c; mmu-miR-340-5p; mmu-miR-466b-3p; mmu-miR-296-5p; mmu-miR-323-3p; mmu-miR-28; mmu-miR-290-3p; mmu-miR-669f-3p; mmu-let-7a; mmu-miR-541; mmu-miR-468; mmu-miR-129-2-3p; mmu-miR-202-3p; mmu-miR-381; mmu-miR-292-3p; mmu-miR-129-1-3p; mmu-miR-302a; mmu-miR-466a-3p; mmu-miR-302d; mmu-let-7g; mmu-miR-195; mmu-miR-124; mmu-miR-…
Cecr2	4.773	118	24.7224	mmu-miR-495; mmu-miR-93; mmu-miR-335-5p; mmu-miR-19a; mmu-miR-20a; mmu-miR-30d; mmu-miR-30a; mmu-miR-434-3p; mmu-miR-29c; mmu-miR-669f-3p; mmu-let-7a; mmu-miR-541; mmu-miR-468; mmu-miR-106a; mmu-miR-17; mmu-miR-129-2-3p; mmu-miR-202-3p; mmu-miR-381; mmu-miR-154; mmu-miR-129-1-3p; mmu-miR-302a; mmu-miR-669a-3p; mmu-miR-466a-3p; mmu-miR-302d; mmu-let-7g; mmu-miR-136; mmu-miR-125a-5p; mmu-miR-20b; m…
Celsr1	1.938	40	20.6398	mmu-miR-200a; mmu-miR-495; mmu-miR-93; mmu-miR-19a; mmu-miR-674; mmu-miR-369-3p; mmu-miR-20a; mmu-miR-28; mmu-miR-290-3p; mmu-miR-669o-3p; mmu-miR-467a; mmu-miR-1198-5p; mmu-miR-106a; mmu-miR-1983; mmu-miR-129-2-3p; mmu-miR-17; mmu-miR-292-3p; mmu-miR-1952; mmu-miR-129-1-3p; mmu-miR-19b; mmu-miR-195; mmu-miR-669a-3p; mmu-miR-16; mmu-miR-374; mmu-miR-760-5p; mmu-miR-669d; mmu-miR-20b; mmu-miR-18b;…
Cenpb	2.895	48	16.5803	mmu-miR-200a; mmu-miR-495; mmu-miR-467e; mmu-miR-145; mmu-miR-466g; mmu-miR-19a; mmu-miR-466b-3p; mmu-miR-296-5p; mmu-miR-21; mmu-miR-205; mmu-miR-155; mmu-miR-467h; mmu-miR-129-2-3p; mmu-miR-381; mmu-miR-129-1-3p; mmu-miR-423-5p; mmu-miR-19b; mmu-miR-195; mmu-miR-124; mmu-miR-148b; mmu-miR-1960; mmu-miR-16; mmu-miR-148a; mmu-miR-484; mmu-miR-762; mmu-miR-377; mmu-miR-141; mmu-miR-466c-3p; mmu-mi…
Cep72	1.668	30	17.9856	mmu-miR-466a-3p; mmu-miR-495; mmu-miR-467e; mmu-miR-669l; mmu-miR-804; mmu-miR-429; mmu-miR-200b; mmu-miR-466g; mmu-miR-1198-3p; mmu-miR-669f-5p; mmu-miR-467f; mmu-miR-18b; mmu-miR-741; mmu-miR-101b; mmu-miR-155; mmu-miR-760-3p; mmu-miR-669a-5p; mmu-miR-378; mmu-miR-382; mmu-miR-1198-5p; mmu-miR-191; mmu-miR-467h; mmu-miR-468; mmu-miR-329; mmu-miR-200c; mmu-miR-381
Cfl2	2.308	48	20.7972	mmu-miR-200a; mmu-miR-495; mmu-miR-467e; mmu-miR-804; mmu-miR-713; mmu-miR-466g; mmu-miR-340-5p; mmu-miR-323-3p; mmu-miR-21; mmu-miR-155; mmu-miR-205; mmu-miR-290-3p; mmu-miR-669f-3p; mmu-miR-467a; mmu-miR-467h; mmu-miR-182; mmu-miR-1983; mmu-miR-381; mmu-miR-292-3p; mmu-miR-433; mmu-miR-350; mmu-miR-1198-3p; mmu-miR-23b; mmu-miR-741; mmu-miR-141; mmu-miR-335-3p; mmu-miR-760-3p; mmu-miR-378; mmu-…
Cflar	4.962	60	12.0919	mmu-miR-495; mmu-miR-804; mmu-miR-335-5p; mmu-miR-674; mmu-miR-467f; mmu-miR-340-5p; mmu-miR-466b-3p; mmu-miR-323-3p; mmu-miR-434-3p; mmu-miR-181a; mmu-miR-205; mmu-miR-669f-3p; mmu-let-7a; mmu-miR-132; mmu-miR-669o-3p; mmu-miR-202-3p; mmu-miR-381; mmu-miR-1952; mmu-miR-154; mmu-miR-669a-3p; mmu-let-7g; mmu-miR-195; mmu-miR-466a-3p; mmu-miR-124; mmu-miR-148b; mmu-miR-1960; mmu-miR-136; mmu-miR-87…
Cgn	1.291	24	18.5902	mmu-miR-433; mmu-miR-297c; mmu-miR-1960; mmu-miR-148b; mmu-miR-136; mmu-miR-760-5p; mmu-miR-431; mmu-miR-148a; mmu-miR-669d; mmu-miR-484; mmu-miR-150; mmu-miR-467f; mmu-miR-340-5p; mmu-miR-18b; mmu-miR-296-5p; mmu-miR-152; mmu-miR-181a; mmu-miR-760-3p; mmu-miR-669f-3p; mmu-miR-134; mmu-miR-297a; mmu-miR-466f
Ch25h	0.444	12	27.027	mmu-miR-34c; mmu-miR-181a; mmu-miR-93; mmu-miR-34a; mmu-miR-106b; mmu-miR-106a; mmu-miR-20b; mmu-miR-17; mmu-miR-20a; mmu-miR-154; mmu-miR-741; mmu-miR-410
Chac1	0.791	19	24.0202	mmu-miR-466c-3p; mmu-miR-195; mmu-miR-142-3p; mmu-miR-760-3p; mmu-miR-132; mmu-miR-15a; mmu-miR-16; mmu-miR-760-5p; mmu-miR-532-5p; mmu-miR-26b; mmu-miR-466b-3p; mmu-miR-1935; mmu-miR-26a; mmu-miR-15b; mmu-miR-28
Chchd4	0.739	13	17.5913	mmu-miR-669o-5p; mmu-miR-669f-3p; mmu-miR-134; mmu-miR-713; mmu-miR-22; mmu-miR-382; mmu-miR-1198-5p; mmu-miR-532-5p; mmu-miR-484; mmu-miR-381; mmu-miR-467f; mmu-miR-762; mmu-miR-466f
Chd3	1.078	26	24.1187	mmu-miR-335-5p; mmu-miR-760-5p; mmu-miR-466g; mmu-miR-431; mmu-miR-484; mmu-miR-150; mmu-miR-467f; mmu-miR-291a-5p; mmu-miR-741; mmu-miR-28; mmu-miR-34c; mmu-miR-669f-3p; mmu-miR-291b-5p; mmu-miR-34a; mmu-miR-183; mmu-miR-423-3p; mmu-miR-1983; mmu-miR-129-2-3p; mmu-miR-329; mmu-miR-1952; mmu-miR-154; mmu-miR-129-1-3p; mmu-miR-423-5p
Chga	0.334	14	41.9162	mmu-miR-32; mmu-miR-195; mmu-miR-669o-5p; mmu-miR-181a; mmu-miR-205; mmu-miR-760-3p; mmu-miR-367; mmu-miR-22; mmu-miR-15a; mmu-miR-16; mmu-miR-25; mmu-miR-363-3p; mmu-miR-15b; mmu-miR-423-5p
Chmp4b	0.777	11	14.157	mmu-miR-350; mmu-miR-145; mmu-miR-1198-5p; mmu-miR-466g; mmu-miR-19a; mmu-miR-1224; mmu-miR-421; mmu-miR-340-5p; mmu-miR-296-5p; mmu-miR-19b
Chn2	1.566	32	20.4342	mmu-miR-669a-3p; mmu-miR-466a-3p; mmu-miR-302d; mmu-miR-433; mmu-miR-495; mmu-miR-350; mmu-miR-1960; mmu-miR-93; mmu-miR-20b; mmu-miR-295; mmu-miR-20a; mmu-miR-340-5p; mmu-miR-466b-3p; mmu-miR-28; mmu-miR-151-5p; mmu-miR-466c-3p; mmu-miR-205; mmu-miR-543; mmu-miR-669o-3p; mmu-miR-106b; mmu-miR-1198-5p; mmu-miR-106a; mmu-miR-17; mmu-miR-291a-3p; mmu-miR-202-3p; mmu-miR-421; mmu-miR-33; mmu-miR-193…
Chst7	0.595	18	30.2521	mmu-miR-32; mmu-miR-350; mmu-miR-669l; mmu-miR-713; mmu-miR-335-5p; mmu-miR-669f-5p; mmu-miR-363-3p; mmu-miR-23b; mmu-miR-367; mmu-miR-669a-5p; mmu-miR-27a; mmu-miR-183; mmu-miR-532-5p; mmu-miR-25; mmu-miR-1983; mmu-miR-103; mmu-miR-1952; mmu-miR-23a
Cic	0.624	23	36.859	mmu-miR-32; mmu-miR-93; mmu-miR-335-5p; mmu-miR-363-3p; mmu-miR-20b; mmu-miR-20a; mmu-miR-296-5p; mmu-miR-377; mmu-miR-291b-3p; mmu-miR-330; mmu-miR-669f-3p; mmu-miR-367; mmu-miR-106b; mmu-miR-25; mmu-miR-106a; mmu-miR-17; mmu-miR-154; mmu-miR-142-5p; mmu-miR-381; mmu-miR-1935; mmu-miR-466f; mmu-miR-423-5p
Cited1	0.076	3	39.4737	mmu-miR-290-3p; mmu-miR-292-3p; mmu-miR-467a
Ckap5	0.44	7	15.9091	mmu-miR-466c-3p; mmu-miR-466a-3p; mmu-miR-669o-5p; mmu-miR-155; mmu-miR-340-5p; mmu-miR-466b-3p; mmu-miR-377
Cks2	0.271	12	44.2804	mmu-miR-466a-3p; mmu-miR-495; mmu-miR-669f-3p; mmu-miR-674; mmu-miR-26b; mmu-miR-33; mmu-miR-381; mmu-miR-467f; mmu-miR-26a; mmu-miR-323-3p
Clcn5	5.919	115	19.429	mmu-miR-495; mmu-miR-145; mmu-miR-335-5p; mmu-miR-96; mmu-miR-466g; mmu-miR-431; mmu-miR-19a; mmu-miR-466b-3p; mmu-miR-30d; mmu-miR-296-5p; mmu-miR-323-3p; mmu-miR-30a; mmu-miR-21; mmu-miR-29c; mmu-let-7a; mmu-miR-541; mmu-miR-468; mmu-miR-129-2-3p; mmu-miR-202-3p; mmu-miR-129-1-3p; mmu-miR-466a-3p; mmu-let-7g; mmu-miR-433; mmu-miR-669l; mmu-miR-136; mmu-miR-1198-3p; mmu-miR-669f-5p; mmu-miR-23b;…
Cldn3	0.368	2	5.43478	mmu-miR-22; mmu-miR-762
Cldn6	0.723	12	16.5975	mmu-miR-195; mmu-miR-141; mmu-miR-200a; mmu-miR-495; mmu-miR-804; mmu-miR-15a; mmu-miR-16; mmu-miR-19a; mmu-miR-1983; mmu-miR-762; mmu-miR-15b; mmu-miR-19b
Cldn7	0.168	2	11.9048	mmu-miR-466a-3p; mmu-miR-150
Clec2d	0.523	6	11.4723	mmu-miR-335-3p; mmu-miR-29c; mmu-miR-29b; mmu-miR-29a; mmu-miR-335-5p; mmu-miR-760-5p
Clgn	1.946	33	16.9579	mmu-miR-142-3p; mmu-miR-495; mmu-miR-1960; mmu-miR-148b; mmu-miR-804; mmu-miR-429; mmu-miR-335-5p; mmu-miR-136; mmu-miR-374; mmu-miR-200b; mmu-miR-148a; mmu-miR-340-5p; mmu-miR-30d; mmu-miR-377; mmu-miR-323-3p; mmu-miR-30a; mmu-miR-330; mmu-miR-152; mmu-miR-181a; mmu-miR-760-3p; mmu-miR-543; mmu-miR-378; mmu-miR-30b; mmu-miR-129-2-3p; mmu-miR-200c; mmu-miR-26b; mmu-miR-142-5p; mmu-miR-129-1-3p; m…
Clip1	2.224	53	23.8309	mmu-miR-495; mmu-miR-466g; mmu-miR-467c; mmu-miR-674; mmu-miR-30d; mmu-miR-30a; mmu-miR-28; mmu-miR-290-3p; mmu-miR-467a; mmu-miR-30b; mmu-miR-129-2-3p; mmu-miR-292-3p; mmu-miR-129-1-3p; mmu-miR-302a; mmu-miR-195; mmu-miR-302d; mmu-miR-148b; mmu-miR-1960; mmu-miR-125a-5p; mmu-miR-16; mmu-miR-760-5p; mmu-miR-1198-3p; mmu-miR-148a; mmu-miR-295; mmu-miR-125b-5p; mmu-miR-741; mmu-miR-291b-3p; mmu-miR…
Cln6	1.119	28	25.0223	mmu-miR-495; mmu-miR-1960; mmu-miR-148b; mmu-miR-124; mmu-miR-335-5p; mmu-miR-136; mmu-miR-125a-5p; mmu-miR-148a; mmu-miR-484; mmu-miR-23b; mmu-miR-125b-5p; mmu-miR-762; mmu-miR-741; mmu-miR-323-3p; mmu-miR-669o-5p; mmu-miR-152; mmu-miR-205; mmu-miR-382; mmu-miR-421; mmu-miR-23a
Clstn3	0.833	12	14.4058	mmu-miR-335-3p; mmu-miR-297c; mmu-miR-205; mmu-miR-713; mmu-miR-136; mmu-miR-1198-5p; mmu-miR-103; mmu-miR-421; mmu-miR-762; mmu-miR-297a; mmu-miR-741
Clybl	0.19	3	15.7895	mmu-miR-134; mmu-miR-381; mmu-miR-22
Cmtm3	0.906	30	33.1126	mmu-miR-142-3p; mmu-miR-148b; mmu-miR-872; mmu-miR-466g; mmu-miR-148a; mmu-miR-1198-3p; mmu-miR-150; mmu-miR-23b; mmu-miR-762; mmu-miR-30d; mmu-miR-296-5p; mmu-miR-291a-5p; mmu-miR-741; mmu-miR-30a; mmu-miR-669o-5p; mmu-miR-34c; mmu-miR-330; mmu-miR-152; mmu-miR-760-3p; mmu-miR-134; mmu-miR-291b-5p; mmu-miR-34a; mmu-miR-27a; mmu-miR-30b; mmu-miR-672; mmu-miR-154; mmu-miR-23a
Cmtm8	0.317	2	6.30915	mmu-miR-329; mmu-miR-431
Cnot2	2.61	46	17.6245	mmu-miR-200a; mmu-miR-495; mmu-miR-297c; mmu-miR-124; mmu-miR-136; mmu-miR-760-5p; mmu-miR-340-5p; mmu-miR-23b; mmu-miR-377; mmu-miR-434-3p; mmu-miR-141; mmu-miR-34c; mmu-miR-330; mmu-miR-181a; mmu-miR-21; mmu-miR-335-3p; mmu-miR-543; mmu-miR-34a; mmu-miR-22; mmu-miR-183; mmu-miR-541; mmu-miR-376b; mmu-miR-1983; mmu-miR-1224; mmu-miR-26b; mmu-miR-421; mmu-miR-33; mmu-miR-142-5p; mmu-miR-26a; mmu-…
Cobl	3.177	77	24.2367	mmu-miR-200a; mmu-miR-29b; mmu-miR-145; mmu-miR-93; mmu-miR-466g; mmu-miR-19a; mmu-miR-150; mmu-miR-20a; mmu-miR-296-5p; mmu-miR-291a-5p; mmu-miR-28; mmu-miR-29c; mmu-miR-290-3p; mmu-miR-205; mmu-miR-291b-5p; mmu-miR-132; mmu-miR-467a; mmu-miR-27a; mmu-miR-191; mmu-miR-541; mmu-miR-106a; mmu-miR-103; mmu-miR-17; mmu-miR-26b; mmu-miR-421; mmu-miR-292-3p; mmu-miR-1952; mmu-miR-19b; mmu-miR-195; mmu…
Coch	0.741	14	18.8934	mmu-miR-466c-3p; mmu-miR-434-3p; mmu-miR-21; mmu-miR-335-3p; mmu-miR-1960; mmu-miR-130a; mmu-miR-301a; mmu-miR-130b; mmu-miR-150; mmu-miR-467f; mmu-miR-340-5p; mmu-miR-142-5p; mmu-miR-466b-3p; mmu-miR-376c
Cog4	0.755	19	25.1656	mmu-miR-29b; mmu-miR-1960; mmu-miR-148b; mmu-miR-145; mmu-miR-872; mmu-miR-148a; mmu-miR-741; mmu-miR-1196; mmu-miR-152; mmu-miR-29a; mmu-miR-29c; mmu-miR-27a; mmu-miR-532-5p; mmu-miR-376b; mmu-miR-468; mmu-miR-1224; mmu-miR-154; mmu-miR-421
Col12a1	2.178	39	17.9063	mmu-miR-302d; mmu-miR-195; mmu-miR-433; mmu-miR-1960; mmu-miR-145; mmu-miR-872; mmu-miR-16; mmu-miR-19a; mmu-miR-674; mmu-miR-295; mmu-miR-762; mmu-miR-376c; mmu-miR-291a-5p; mmu-miR-34c; mmu-miR-335-3p; mmu-miR-205; mmu-miR-543; mmu-miR-291b-5p; mmu-miR-134; mmu-miR-34a; mmu-miR-15a; mmu-miR-541; mmu-miR-103; mmu-miR-129-2-3p; mmu-miR-291a-3p; mmu-miR-154; mmu-miR-129-1-3p; mmu-miR-302a; mmu-miR…
Col16a1	1.811	26	14.3567	mmu-miR-495; mmu-miR-350; mmu-miR-29b; mmu-miR-145; mmu-miR-136; mmu-miR-760-5p; mmu-miR-484; mmu-miR-296-5p; mmu-miR-28; mmu-miR-181a; mmu-miR-205; mmu-miR-29a; mmu-miR-29c; mmu-miR-543; mmu-miR-183; mmu-miR-1983; mmu-miR-103; mmu-miR-202-3p; mmu-miR-1224; mmu-miR-423-5p
Col2a1	0.438	4	9.13242	mmu-miR-330; mmu-miR-134; mmu-miR-804; mmu-miR-713
Col4a2	0.971	31	31.9258	mmu-miR-302d; mmu-let-7g; mmu-miR-467e; mmu-miR-29b; mmu-miR-93; mmu-miR-20b; mmu-miR-295; mmu-miR-20a; mmu-let-7c; mmu-miR-741; mmu-miR-28; mmu-miR-34c; mmu-miR-29c; mmu-miR-29a; mmu-miR-760-3p; mmu-let-7a; mmu-miR-34a; mmu-miR-22; mmu-miR-106b; mmu-miR-467h; mmu-miR-106a; mmu-let-7e; mmu-miR-17; mmu-miR-291a-3p; mmu-miR-202-3p; mmu-miR-302a; mmu-miR-294
Col4a4	4.708	75	15.9303	mmu-miR-200a; mmu-miR-29b; mmu-miR-145; mmu-miR-804; mmu-miR-96; mmu-miR-130a; mmu-miR-466g; mmu-miR-130b; mmu-miR-674; mmu-miR-467f; mmu-miR-340-5p; mmu-miR-323-3p; mmu-miR-434-3p; mmu-miR-29c; mmu-miR-205; mmu-miR-669f-3p; mmu-miR-543; mmu-miR-669o-3p; mmu-miR-27a; mmu-miR-1198-5p; mmu-miR-541; mmu-miR-468; mmu-miR-182; mmu-miR-26b; mmu-miR-672; mmu-miR-669a-3p; mmu-miR-466a-3p; mmu-miR-195; mm…
Col5a1	2.498	79	31.6253	mmu-miR-200a; mmu-miR-29b; mmu-miR-93; mmu-miR-713; mmu-miR-96; mmu-miR-200b; mmu-miR-20a; mmu-miR-30d; mmu-miR-291a-5p; mmu-miR-30a; mmu-miR-181a; mmu-miR-29c; mmu-miR-669f-3p; mmu-miR-543; mmu-miR-367; mmu-miR-291b-5p; mmu-miR-30b; mmu-miR-1198-5p; mmu-miR-191; mmu-miR-106a; mmu-miR-103; mmu-miR-182; mmu-miR-129-2-3p; mmu-miR-17; mmu-miR-26b; mmu-miR-672; mmu-miR-381; mmu-miR-129-1-3p; mmu-miR-…
Col8a1	2.653	63	23.7467	mmu-miR-467e; mmu-miR-29b; mmu-miR-335-5p; mmu-miR-130a; mmu-miR-466g; mmu-miR-130b; mmu-miR-369-3p; mmu-miR-340-5p; mmu-miR-466b-3p; mmu-miR-30d; mmu-miR-30a; mmu-miR-28; mmu-miR-669o-5p; mmu-miR-29c; mmu-miR-155; mmu-miR-205; mmu-miR-669o-3p; mmu-miR-30b; mmu-miR-1198-5p; mmu-miR-467h; mmu-miR-468; mmu-miR-1983; mmu-miR-202-3p; mmu-miR-26b; mmu-miR-672; mmu-miR-669a-3p; mmu-miR-142-3p; mmu-miR-…
Colec12	0.988	2	2.02429	mmu-miR-1198-5p; mmu-miR-323-3p
Copg2	1.303	31	23.7913	mmu-miR-466a-3p; mmu-miR-200a; mmu-miR-495; mmu-miR-350; mmu-miR-29b; mmu-miR-145; mmu-miR-760-5p; mmu-miR-762; mmu-miR-377; mmu-miR-28; mmu-miR-141; mmu-miR-34c; mmu-miR-181a; mmu-miR-330; mmu-miR-155; mmu-miR-29a; mmu-miR-29c; mmu-miR-669f-3p; mmu-miR-132; mmu-miR-22; mmu-miR-34a; mmu-miR-27a; mmu-miR-376b; mmu-miR-182; mmu-miR-672; mmu-miR-142-5p; mmu-miR-410
Cotl1	1.02	18	17.6471	mmu-miR-433; mmu-miR-34c; mmu-miR-330; mmu-miR-205; mmu-miR-760-3p; mmu-miR-34a; mmu-miR-1198-5p; mmu-miR-466g; mmu-miR-193b; mmu-miR-129-2-3p; mmu-miR-1224; mmu-miR-762; mmu-miR-129-1-3p; mmu-miR-28
Cpe	0.565	15	26.5487	mmu-miR-1196; mmu-miR-181a; mmu-miR-155; mmu-miR-760-3p; mmu-miR-669l; mmu-miR-543; mmu-miR-669a-5p; mmu-miR-382; mmu-miR-431; mmu-miR-669d; mmu-miR-669f-5p; mmu-miR-33; mmu-miR-423-5p
Cplx2	4.205	63	14.9822	mmu-miR-150; mmu-miR-296-5p; mmu-miR-28; mmu-miR-669o-5p; mmu-miR-669f-3p; mmu-miR-669o-3p; mmu-miR-34a; mmu-miR-27a; mmu-miR-1983; mmu-miR-26b; mmu-miR-381; mmu-miR-1952; mmu-miR-423-5p; mmu-miR-669a-3p; mmu-miR-466a-3p; mmu-miR-148b; mmu-miR-1960; mmu-miR-136; mmu-miR-125a-5p; mmu-miR-760-5p; mmu-miR-1198-3p; mmu-miR-148a; mmu-miR-484; mmu-miR-125b-5p; mmu-miR-762; mmu-miR-376c; mmu-miR-741; mm…
Crb3	0.622	13	20.9003	mmu-let-7g; mmu-let-7a; mmu-miR-27a; mmu-let-7e; mmu-miR-202-3p; mmu-let-7c; mmu-miR-410; mmu-miR-28; mmu-miR-377
Crct1	0.315	2	6.34921	mmu-miR-672; mmu-miR-381
Creb3l2	5.17	102	19.7292	mmu-miR-93; mmu-miR-713; mmu-miR-431; mmu-miR-20a; mmu-miR-340-5p; mmu-miR-30d; mmu-miR-30a; mmu-miR-28; mmu-miR-434-3p; mmu-miR-29c; mmu-miR-290-3p; mmu-miR-106a; mmu-miR-17; mmu-miR-129-2-3p; mmu-miR-381; mmu-miR-292-3p; mmu-miR-129-1-3p; mmu-miR-466a-3p; mmu-miR-195; mmu-miR-124; mmu-miR-148b; mmu-miR-136; mmu-miR-760-5p; mmu-miR-1198-3p; mmu-miR-148a; mmu-miR-20b; mmu-miR-377; mmu-miR-330; mm…
Crem	1.629	43	26.3966	mmu-miR-495; mmu-miR-145; mmu-miR-130a; mmu-miR-200b; mmu-miR-431; mmu-miR-130b; mmu-miR-150; mmu-miR-340-5p; mmu-miR-291a-5p; mmu-miR-323-3p; mmu-miR-28; mmu-miR-21; mmu-miR-543; mmu-miR-291b-5p; mmu-miR-34a; mmu-miR-103; mmu-miR-26b; mmu-miR-148b; mmu-miR-1960; mmu-miR-297c; mmu-miR-429; mmu-miR-136; mmu-miR-374; mmu-miR-148a; mmu-miR-23b; mmu-miR-152; mmu-miR-34c; mmu-miR-335-3p; mmu-miR-301a;…
Crim1	2.36	66	27.9661	mmu-miR-200a; mmu-miR-495; mmu-miR-145; mmu-miR-93; mmu-miR-335-5p; mmu-miR-96; mmu-miR-467c; mmu-miR-150; mmu-miR-369-3p; mmu-miR-20a; mmu-miR-467f; mmu-miR-466b-3p; mmu-miR-28; mmu-miR-669o-5p; mmu-miR-21; mmu-miR-181a; mmu-miR-669f-3p; mmu-miR-543; mmu-miR-132; mmu-miR-106a; mmu-miR-103; mmu-miR-17; mmu-miR-421; mmu-miR-381; mmu-miR-302a; mmu-miR-195; mmu-miR-302d; mmu-miR-350; mmu-miR-1960; m…
Crtac1	0.525	4	7.61905	mmu-miR-434-3p; mmu-miR-669o-5p; mmu-miR-1952; mmu-miR-423-3p
Crtap	0.395	10	25.3165	mmu-miR-290-3p; mmu-miR-467a; mmu-miR-125a-5p; mmu-miR-1198-5p; mmu-miR-26b; mmu-miR-125b-5p; mmu-miR-292-3p; mmu-miR-26a; mmu-miR-377
Cryab	0.138	4	28.9855	mmu-miR-21; mmu-miR-129-2-3p; mmu-miR-674; mmu-miR-129-1-3p
Crym	0.254	5	19.685	mmu-miR-141; mmu-miR-200a; mmu-miR-350; mmu-miR-291b-5p; mmu-miR-291a-5p
Csf1	2.111	47	22.2643	mmu-miR-467e; mmu-miR-713; mmu-miR-200b; mmu-miR-466g; mmu-miR-467c; mmu-miR-150; mmu-miR-674; mmu-miR-296-5p; mmu-miR-205; mmu-miR-290-3p; mmu-miR-367; mmu-miR-467a; mmu-miR-1198-5p; mmu-miR-467h; mmu-miR-1952; mmu-miR-292-3p; mmu-miR-302a; mmu-miR-302d; mmu-miR-32; mmu-miR-466a-3p; mmu-miR-433; mmu-miR-124; mmu-miR-350; mmu-miR-429; mmu-miR-125a-5p; mmu-miR-760-5p; mmu-miR-669d; mmu-miR-363-3p;…
Csgalnact1	1.643	29	17.6506	mmu-miR-32; mmu-miR-200a; mmu-miR-350; mmu-miR-96; mmu-miR-363-3p; mmu-miR-674; mmu-miR-340-5p; mmu-miR-291a-5p; mmu-miR-741; mmu-miR-1196; mmu-miR-141; mmu-miR-330; mmu-miR-34c; mmu-miR-669f-3p; mmu-miR-543; mmu-miR-367; mmu-miR-291b-5p; mmu-miR-34a; mmu-miR-1198-5p; mmu-miR-193b; mmu-miR-25; mmu-miR-182; mmu-miR-129-2-3p; mmu-miR-329; mmu-miR-381; mmu-miR-129-1-3p
Csnk1a1	2.628	57	21.6895	mmu-miR-200a; mmu-miR-495; mmu-miR-93; mmu-miR-713; mmu-miR-466g; mmu-miR-467c; mmu-miR-150; mmu-miR-674; mmu-miR-20a; mmu-miR-467f; mmu-miR-30d; mmu-miR-291a-5p; mmu-miR-30a; mmu-miR-181a; mmu-miR-290-3p; mmu-miR-155; mmu-miR-291b-5p; mmu-miR-467a; mmu-miR-27a; mmu-miR-30b; mmu-miR-541; mmu-miR-106a; mmu-miR-103; mmu-miR-17; mmu-miR-421; mmu-miR-292-3p; mmu-miR-1952; mmu-miR-302a; mmu-miR-302d; …
Cstad	0.474	2	4.21941	mmu-miR-297c; mmu-miR-297a
Ctbp2	1.888	42	22.2458	mmu-miR-195; mmu-miR-200a; mmu-miR-350; mmu-miR-124; mmu-miR-713; mmu-miR-335-5p; mmu-miR-16; mmu-miR-125a-5p; mmu-miR-19a; mmu-miR-150; mmu-miR-674; mmu-miR-23b; mmu-miR-18b; mmu-miR-125b-5p; mmu-miR-762; mmu-miR-28; mmu-miR-151-5p; mmu-miR-141; mmu-miR-330; mmu-miR-335-3p; mmu-miR-127; mmu-miR-760-3p; mmu-miR-22; mmu-miR-15a; mmu-miR-423-3p; mmu-miR-129-2-3p; mmu-miR-1952; mmu-miR-129-1-3p; mmu…
Ctgf	1.608	48	29.8507	mmu-miR-29b; mmu-miR-466g; mmu-miR-431; mmu-miR-19a; mmu-miR-30d; mmu-miR-291a-5p; mmu-miR-30a; mmu-miR-434-3p; mmu-miR-29c; mmu-miR-291b-5p; mmu-miR-30b; mmu-miR-541; mmu-miR-103; mmu-miR-1983; mmu-miR-129-2-3p; mmu-miR-26b; mmu-miR-672; mmu-miR-1952; mmu-miR-129-1-3p; mmu-miR-423-5p; mmu-miR-19b; mmu-miR-466a-3p; mmu-miR-195; mmu-miR-433; mmu-miR-142-3p; mmu-miR-297c; mmu-miR-125a-5p; mmu-miR-1…
Cthrc1	0.354	15	42.3729	mmu-miR-467e; mmu-miR-335-3p; mmu-miR-543; mmu-miR-429; mmu-miR-30b; mmu-miR-200b; mmu-miR-467h; mmu-miR-200c; mmu-miR-30d; mmu-miR-30a
Ctsc	0.986	24	24.3408	mmu-miR-466a-3p; mmu-miR-200a; mmu-miR-804; mmu-miR-136; mmu-miR-467f; mmu-miR-466b-3p; mmu-miR-30d; mmu-miR-376c; mmu-miR-30a; mmu-miR-141; mmu-miR-466c-3p; mmu-miR-335-3p; mmu-miR-134; mmu-miR-99b; mmu-miR-30b; mmu-miR-33; mmu-miR-421
Ctsh	1.1	18	16.3636	mmu-miR-466a-3p; mmu-let-7g; mmu-miR-350; mmu-miR-136; mmu-miR-467f; mmu-miR-376c; mmu-miR-296-5p; mmu-let-7c; mmu-miR-330; mmu-miR-335-3p; mmu-miR-760-3p; mmu-let-7a; mmu-miR-543; mmu-miR-22; mmu-let-7e; mmu-miR-26b; mmu-miR-26a
Cx3cl1	1.867	41	21.9604	mmu-miR-200a; mmu-miR-29b; mmu-miR-130a; mmu-miR-130b; mmu-miR-296-5p; mmu-miR-28; mmu-miR-29c; mmu-miR-205; mmu-miR-34a; mmu-miR-1893; mmu-miR-27a; mmu-miR-103; mmu-miR-1983; mmu-miR-154; mmu-miR-423-5p; mmu-miR-195; mmu-miR-350; mmu-miR-136; mmu-miR-872; mmu-miR-16; mmu-miR-760-5p; mmu-miR-18b; mmu-miR-762; mmu-miR-141; mmu-miR-330; mmu-miR-34c; mmu-miR-29a; mmu-miR-134; mmu-miR-15a; mmu-miR-37…
Cxcl12	5.188	102	19.6608	mmu-miR-93; mmu-miR-431; mmu-miR-19a; mmu-miR-20a; mmu-miR-30d; mmu-miR-296-5p; mmu-miR-30a; mmu-miR-21; mmu-miR-155; mmu-let-7a; mmu-miR-468; mmu-miR-106a; mmu-miR-17; mmu-miR-129-2-3p; mmu-miR-672; mmu-miR-129-1-3p; mmu-let-7g; mmu-miR-195; mmu-miR-124; mmu-miR-148b; mmu-miR-136; mmu-miR-125a-5p; mmu-miR-760-5p; mmu-miR-1198-3p; mmu-miR-148a; mmu-miR-20b; mmu-miR-23b; mmu-miR-125b-5p; mmu-miR-3…
Cxcl14	1.145	23	20.0873	mmu-miR-93; mmu-miR-125a-5p; mmu-miR-760-5p; mmu-miR-484; mmu-miR-20b; mmu-miR-20a; mmu-miR-125b-5p; mmu-miR-741; mmu-miR-28; mmu-miR-291b-3p; mmu-miR-760-3p; mmu-miR-134; mmu-miR-22; mmu-miR-27a; mmu-miR-106b; mmu-miR-106a; mmu-miR-182; mmu-miR-468; mmu-miR-17; mmu-miR-129-2-3p; mmu-miR-129-1-3p
Cycs	2.674	59	22.0643	mmu-miR-200a; mmu-miR-145; mmu-miR-93; mmu-miR-804; mmu-miR-130a; mmu-miR-130b; mmu-miR-20a; mmu-miR-467f; mmu-miR-340-5p; mmu-miR-466b-3p; mmu-miR-291a-5p; mmu-miR-669o-5p; mmu-miR-205; mmu-miR-155; mmu-miR-543; mmu-miR-291b-5p; mmu-miR-1198-5p; mmu-miR-106a; mmu-miR-103; mmu-miR-17; mmu-miR-26b; mmu-miR-381; mmu-miR-466a-3p; mmu-miR-148b; mmu-miR-669l; mmu-miR-148a; mmu-miR-669f-5p; mmu-miR-20b…
Cyp1b1	3.14	61	19.4268	mmu-miR-145; mmu-miR-431; mmu-miR-340-5p; mmu-miR-30d; mmu-miR-291a-5p; mmu-miR-323-3p; mmu-miR-30a; mmu-miR-669o-5p; mmu-miR-21; mmu-miR-367; mmu-miR-291b-5p; mmu-miR-132; mmu-miR-30b; mmu-miR-129-2-3p; mmu-miR-26b; mmu-miR-672; mmu-miR-421; mmu-miR-381; mmu-miR-1952; mmu-miR-129-1-3p; mmu-miR-32; mmu-miR-148b; mmu-miR-1960; mmu-miR-297c; mmu-miR-669l; mmu-miR-760-5p; mmu-miR-148a; mmu-miR-669d;…
Cyp26a1	0.177	4	22.5989	mmu-miR-466a-3p; mmu-miR-669f-3p; mmu-miR-467f; mmu-miR-142-5p
D10Wsu102e	2.913	30	10.2987	mmu-miR-302d; mmu-miR-433; mmu-miR-429; mmu-miR-335-5p; mmu-miR-96; mmu-miR-374; mmu-miR-200b; mmu-miR-150; mmu-miR-369-3p; mmu-miR-295; mmu-miR-467f; mmu-miR-762; mmu-miR-377; mmu-miR-669o-5p; mmu-miR-290-3p; mmu-miR-669f-3p; mmu-miR-467a; mmu-miR-27a; mmu-miR-468; mmu-miR-182; mmu-miR-291a-3p; mmu-miR-26b; mmu-miR-200c; mmu-miR-381; mmu-miR-292-3p; mmu-miR-26a; mmu-miR-302a; mmu-miR-294
D16Ertd472e	1.106	38	34.358	mmu-miR-495; mmu-miR-29b; mmu-miR-713; mmu-miR-96; mmu-miR-200b; mmu-miR-674; mmu-miR-369-3p; mmu-miR-30d; mmu-miR-30a; mmu-miR-29c; mmu-miR-30b; mmu-miR-1198-5p; mmu-miR-182; mmu-miR-1983; mmu-miR-195; mmu-miR-1960; mmu-miR-297c; mmu-miR-669l; mmu-miR-429; mmu-miR-136; mmu-miR-16; mmu-miR-374; mmu-miR-669f-5p; mmu-miR-23b; mmu-miR-1196; mmu-miR-29a; mmu-miR-335-3p; mmu-miR-134; mmu-miR-669a-5p; …
D1Pas1	0.769	10	13.0039	mmu-miR-669a-3p; mmu-miR-142-3p; mmu-miR-495; mmu-miR-669o-3p; mmu-miR-382; mmu-miR-183; mmu-miR-18b; mmu-miR-340-5p; mmu-miR-323-3p
D8Ertd82e	0.37	7	18.9189	mmu-miR-669d; mmu-miR-132; mmu-miR-382; mmu-miR-760-5p; mmu-miR-466f; mmu-miR-151-5p
D930020B18Rik	2.005	42	20.9476	mmu-miR-93; mmu-miR-19a; mmu-miR-20a; mmu-miR-28; mmu-miR-669o-5p; mmu-miR-669f-3p; mmu-miR-543; mmu-miR-34a; mmu-miR-541; mmu-miR-106a; mmu-miR-17; mmu-miR-202-3p; mmu-miR-672; mmu-miR-1952; mmu-miR-302a; mmu-miR-19b; mmu-miR-195; mmu-miR-302d; mmu-miR-433; mmu-miR-16; mmu-miR-374; mmu-miR-20b; mmu-miR-295; mmu-miR-762; mmu-miR-376c; mmu-miR-741; mmu-miR-330; mmu-miR-34c; mmu-miR-760-3p; mmu-miR…
Dab1	3.347	89	26.591	mmu-miR-495; mmu-miR-145; mmu-miR-93; mmu-miR-804; mmu-miR-335-5p; mmu-miR-96; mmu-miR-466g; mmu-miR-20a; mmu-miR-30d; mmu-miR-323-3p; mmu-miR-30a; mmu-miR-28; mmu-miR-29c; mmu-miR-367; mmu-let-7a; mmu-miR-106a; mmu-miR-17; mmu-miR-202-3p; mmu-let-7g; mmu-miR-195; mmu-miR-433; mmu-miR-148b; mmu-miR-760-5p; mmu-miR-148a; mmu-miR-20b; mmu-miR-34c; mmu-miR-152; mmu-miR-335-3p; mmu-miR-22; mmu-miR-15…
Dact2	0.432	14	32.4074	mmu-miR-32; mmu-miR-34c; mmu-miR-495; mmu-miR-335-3p; mmu-miR-297c; mmu-miR-367; mmu-miR-34a; mmu-miR-25; mmu-miR-363-3p; mmu-miR-18b; mmu-miR-23b; mmu-miR-33; mmu-miR-297a; mmu-miR-23a
Dap	1.031	18	17.4588	mmu-miR-335-5p; mmu-miR-374; mmu-miR-760-5p; mmu-miR-291a-5p; mmu-miR-741; mmu-miR-377; mmu-miR-28; mmu-miR-434-3p; mmu-miR-291b-5p; mmu-miR-760-3p; mmu-miR-183; mmu-miR-541; mmu-miR-129-2-3p; mmu-miR-1224; mmu-miR-672; mmu-miR-129-1-3p
Dapk2	0.671	4	5.96125	mmu-miR-350; mmu-miR-150; mmu-miR-291b-5p; mmu-miR-291a-5p
Dctpp1	0.077	2	25.974	mmu-miR-124; mmu-miR-296-5p
Ddah1	2.719	62	22.8025	mmu-miR-200a; mmu-miR-29b; mmu-miR-335-5p; mmu-miR-96; mmu-miR-130a; mmu-miR-200b; mmu-miR-431; mmu-miR-130b; mmu-miR-30d; mmu-miR-323-3p; mmu-miR-30a; mmu-miR-28; mmu-miR-181a; mmu-miR-29c; mmu-miR-669f-3p; mmu-miR-27a; mmu-miR-30b; mmu-miR-182; mmu-miR-672; mmu-miR-381; mmu-miR-423-5p; mmu-miR-433; mmu-miR-124; mmu-miR-350; mmu-miR-669l; mmu-miR-429; mmu-miR-669f-5p; mmu-miR-23b; mmu-miR-762; m…
Ddb1	0.651	11	16.8971	mmu-let-7g; mmu-miR-760-3p; mmu-let-7a; mmu-miR-27a; mmu-let-7e; mmu-miR-202-3p; mmu-miR-1952; mmu-miR-340-5p; mmu-miR-376c; mmu-let-7c; mmu-miR-377
Ddb2	0.345	4	11.5942	mmu-miR-200c; mmu-miR-429; mmu-miR-200b; mmu-miR-28
Ddit4	0.861	18	20.9059	mmu-miR-669o-5p; mmu-miR-433; mmu-miR-297c; mmu-miR-713; mmu-miR-760-5p; mmu-miR-466g; mmu-miR-193b; mmu-miR-26b; mmu-miR-762; mmu-miR-26a; mmu-miR-297a; mmu-miR-377; mmu-miR-423-5p
Ddx19a	1.033	23	22.2652	mmu-miR-433; mmu-miR-297c; mmu-miR-155; mmu-miR-136; mmu-miR-760-5p; mmu-miR-532-5p; mmu-miR-376b; mmu-miR-1983; mmu-miR-129-2-3p; mmu-miR-340-5p; mmu-miR-762; mmu-miR-129-1-3p; mmu-miR-1935; mmu-miR-296-5p; mmu-miR-297a
Ddx21	2.102	46	21.8839	mmu-miR-145; mmu-miR-335-5p; mmu-miR-467c; mmu-miR-467f; mmu-miR-340-5p; mmu-miR-291a-5p; mmu-miR-323-3p; mmu-miR-205; mmu-miR-290-3p; mmu-miR-291b-5p; mmu-miR-467a; mmu-miR-1198-5p; mmu-miR-129-2-3p; mmu-miR-672; mmu-miR-292-3p; mmu-miR-129-1-3p; mmu-miR-302a; mmu-miR-423-5p; mmu-miR-302d; mmu-miR-466a-3p; mmu-miR-297c; mmu-miR-350; mmu-miR-295; mmu-miR-377; mmu-miR-291b-3p; mmu-miR-330; mmu-miR…
Ddx46	2.425	41	16.9072	mmu-miR-200a; mmu-miR-495; mmu-miR-29b; mmu-miR-145; mmu-miR-93; mmu-miR-466g; mmu-miR-20a; mmu-miR-467f; mmu-miR-30d; mmu-miR-30a; mmu-miR-29c; mmu-miR-669f-3p; mmu-miR-367; mmu-miR-669o-3p; mmu-miR-30b; mmu-miR-541; mmu-miR-106a; mmu-miR-17; mmu-miR-302a; mmu-miR-302d; mmu-miR-32; mmu-miR-669a-3p; mmu-miR-20b; mmu-miR-363-3p; mmu-miR-295; mmu-miR-23b; mmu-miR-141; mmu-miR-29a; mmu-miR-106b; mmu…
Ddx58	0.961	12	12.487	mmu-miR-466a-3p; mmu-miR-335-3p; mmu-miR-297c; mmu-miR-713; mmu-miR-293; mmu-miR-22; mmu-miR-484; mmu-miR-129-2-3p; mmu-miR-129-1-3p; mmu-miR-297a; mmu-miR-292-5p
Dennd3	1.588	53	33.3753	mmu-miR-93; mmu-miR-713; mmu-miR-130a; mmu-miR-466g; mmu-miR-130b; mmu-miR-674; mmu-miR-20a; mmu-miR-30d; mmu-miR-30a; mmu-miR-181a; mmu-miR-205; mmu-miR-155; mmu-miR-669f-3p; mmu-let-7a; mmu-miR-27a; mmu-miR-30b; mmu-miR-1983; mmu-miR-106a; mmu-miR-17; mmu-miR-26b; mmu-miR-202-3p; mmu-miR-1952; mmu-miR-154; mmu-let-7g; mmu-miR-350; mmu-miR-148b; mmu-miR-669l; mmu-miR-125a-5p; mmu-miR-148a; mmu-m…
Denr	1.541	30	19.4679	mmu-miR-495; mmu-miR-148b; mmu-miR-124; mmu-miR-96; mmu-miR-148a; mmu-miR-669d; mmu-miR-150; mmu-miR-467f; mmu-miR-23b; mmu-miR-151-5p; mmu-miR-152; mmu-miR-181a; mmu-miR-21; mmu-miR-290-3p; mmu-miR-760-3p; mmu-miR-669f-3p; mmu-miR-543; mmu-miR-99b; mmu-miR-467a; mmu-miR-27a; mmu-miR-182; mmu-miR-329; mmu-miR-1224; mmu-miR-292-3p; mmu-miR-1935; mmu-miR-23a
Depdc1b	0.883	33	37.3726	mmu-miR-32; mmu-miR-495; mmu-miR-148b; mmu-miR-713; mmu-miR-429; mmu-miR-130a; mmu-miR-200b; mmu-miR-148a; mmu-miR-19a; mmu-miR-363-3p; mmu-miR-130b; mmu-miR-291a-5p; mmu-miR-377; mmu-miR-101b; mmu-miR-151-5p; mmu-miR-152; mmu-miR-181a; mmu-miR-335-3p; mmu-miR-367; mmu-miR-291b-5p; mmu-miR-27a; mmu-miR-301a; mmu-miR-25; mmu-miR-329; mmu-miR-200c; mmu-miR-26b; mmu-miR-381; mmu-miR-26a; mmu-miR-292…
Dhfr	4.25	69	16.2353	mmu-miR-200a; mmu-miR-29b; mmu-miR-713; mmu-miR-96; mmu-miR-200b; mmu-miR-19a; mmu-miR-150; mmu-miR-674; mmu-miR-467f; mmu-miR-340-5p; mmu-miR-466b-3p; mmu-miR-29c; mmu-miR-155; mmu-miR-132; mmu-miR-669o-3p; mmu-miR-34a; mmu-miR-182; mmu-miR-1983; mmu-miR-26b; mmu-miR-154; mmu-miR-302a; mmu-miR-423-5p; mmu-miR-19b; mmu-miR-669a-3p; mmu-miR-302d; mmu-miR-195; mmu-miR-124; mmu-miR-297c; mmu-miR-429…
Diablo	2.098	30	14.2993	mmu-miR-433; mmu-miR-200a; mmu-miR-467e; mmu-miR-29b; mmu-miR-1960; mmu-miR-148b; mmu-miR-145; mmu-miR-93; mmu-miR-148a; mmu-miR-20b; mmu-miR-20a; mmu-miR-291a-5p; mmu-miR-141; mmu-miR-669o-5p; mmu-miR-330; mmu-miR-152; mmu-miR-29c; mmu-miR-29a; mmu-miR-291b-5p; mmu-miR-22; mmu-miR-106b; mmu-miR-1198-5p; mmu-miR-467h; mmu-miR-468; mmu-miR-106a; mmu-miR-17; mmu-miR-1952; mmu-miR-1935; mmu-miR-423-…
Dicer1	3.851	76	19.7351	mmu-miR-200a; mmu-miR-713; mmu-miR-19a; mmu-miR-674; mmu-miR-369-3p; mmu-miR-340-5p; mmu-miR-296-5p; mmu-miR-434-3p; mmu-miR-669o-5p; mmu-miR-155; mmu-miR-543; mmu-miR-367; mmu-miR-132; mmu-miR-34a; mmu-miR-27a; mmu-miR-1198-5p; mmu-miR-191; mmu-miR-468; mmu-miR-26b; mmu-miR-19b; mmu-miR-32; mmu-miR-142-3p; mmu-miR-124; mmu-miR-1960; mmu-miR-669l; mmu-miR-374; mmu-miR-125a-5p; mmu-miR-669f-5p; mm…
Dido1	2.491	58	23.2838	mmu-miR-467e; mmu-miR-713; mmu-miR-130a; mmu-miR-130b; mmu-miR-674; mmu-miR-291a-5p; mmu-miR-434-3p; mmu-miR-181a; mmu-miR-205; mmu-miR-543; mmu-miR-291b-5p; mmu-miR-467h; mmu-miR-103; mmu-miR-26b; mmu-miR-302a; mmu-miR-195; mmu-miR-302d; mmu-miR-433; mmu-miR-350; mmu-miR-148b; mmu-miR-1960; mmu-miR-125a-5p; mmu-miR-16; mmu-miR-760-5p; mmu-miR-148a; mmu-miR-295; mmu-miR-125b-5p; mmu-miR-23b; mmu-…
Dio3	0.951	16	16.8244	mmu-miR-195; mmu-miR-16; mmu-miR-1198-3p; mmu-miR-150; mmu-miR-674; mmu-miR-720; mmu-miR-467f; mmu-miR-181a; mmu-miR-21; mmu-miR-205; mmu-miR-543; mmu-miR-1893; mmu-miR-15a; mmu-miR-26b; mmu-miR-26a; mmu-miR-15b
Disc1	0.266	3	11.2782	mmu-miR-34c; mmu-miR-672; mmu-miR-34a
Dkc1	1.016	11	10.8268	mmu-miR-141; mmu-miR-330; mmu-miR-200a; mmu-miR-181a; mmu-miR-155; mmu-miR-22; mmu-miR-760-5p; mmu-miR-183; mmu-miR-376b; mmu-miR-674
Dkk1	1.322	11	8.32073	mmu-miR-141; mmu-miR-200a; mmu-miR-760-3p; mmu-miR-543; mmu-miR-804; mmu-miR-136; mmu-miR-431; mmu-miR-103; mmu-miR-1983; mmu-miR-741
Dkk2	2.184	51	23.3516	mmu-miR-145; mmu-miR-200b; mmu-miR-466b-3p; mmu-miR-323-3p; mmu-miR-21; mmu-miR-205; mmu-miR-543; mmu-miR-367; mmu-miR-34a; mmu-miR-27a; mmu-miR-1198-5p; mmu-miR-191; mmu-miR-182; mmu-miR-1983; mmu-miR-154; mmu-miR-195; mmu-miR-32; mmu-miR-350; mmu-miR-429; mmu-miR-136; mmu-miR-872; mmu-miR-16; mmu-miR-760-5p; mmu-miR-363-3p; mmu-miR-23b; mmu-miR-376c; mmu-miR-741; mmu-miR-466c-3p; mmu-miR-34c; m…
Dkk3	2.192	40	18.2482	mmu-miR-495; mmu-miR-335-5p; mmu-miR-466g; mmu-miR-431; mmu-miR-19a; mmu-miR-467f; mmu-miR-340-5p; mmu-miR-30d; mmu-miR-30a; mmu-miR-205; mmu-miR-34a; mmu-miR-30b; mmu-miR-182; mmu-miR-129-2-3p; mmu-miR-154; mmu-miR-129-1-3p; mmu-miR-19b; mmu-miR-433; mmu-miR-124; mmu-miR-148b; mmu-miR-1960; mmu-miR-669l; mmu-miR-872; mmu-miR-148a; mmu-miR-669d; mmu-miR-669f-5p; mmu-miR-484; mmu-miR-762; mmu-miR-…
Dlgap3	0.654	8	12.2324	mmu-miR-22; mmu-miR-296-5p; mmu-miR-27a; mmu-miR-1935; mmu-miR-423-5p; mmu-miR-101b
Dlgap5	0.237	2	8.43882	mmu-miR-181a; mmu-miR-543
Dll1	0.676	15	22.1893	mmu-miR-32; mmu-miR-433; mmu-miR-335-3p; mmu-miR-124; mmu-miR-367; mmu-miR-134; mmu-miR-378; mmu-miR-1198-5p; mmu-miR-19a; mmu-miR-25; mmu-miR-363-3p; mmu-miR-741; mmu-miR-466f; mmu-miR-410; mmu-miR-19b
Dll3	0.368	3	8.15217	mmu-miR-484; mmu-miR-340-5p; mmu-miR-142-5p
Dna2	0.866	27	31.1778	mmu-let-7g; mmu-miR-29b; mmu-miR-297c; mmu-miR-93; mmu-miR-466g; mmu-miR-20b; mmu-miR-20a; mmu-miR-291a-5p; mmu-let-7c; mmu-miR-323-3p; mmu-miR-101b; mmu-miR-181a; mmu-miR-29c; mmu-miR-29a; mmu-let-7a; mmu-miR-291b-5p; mmu-miR-27a; mmu-miR-106b; mmu-miR-376b; mmu-miR-106a; mmu-let-7e; mmu-miR-1983; mmu-miR-17; mmu-miR-202-3p; mmu-miR-297a
Dnajb4	1.192	27	22.651	mmu-miR-466a-3p; mmu-miR-495; mmu-miR-467e; mmu-miR-429; mmu-miR-200b; mmu-miR-150; mmu-miR-762; mmu-miR-466b-3p; mmu-miR-30d; mmu-miR-291a-5p; mmu-miR-30a; mmu-miR-101b; mmu-miR-466c-3p; mmu-miR-181a; mmu-miR-335-3p; mmu-miR-132; mmu-miR-134; mmu-miR-291b-5p; mmu-miR-30b; mmu-miR-467h; mmu-miR-541; mmu-miR-200c; mmu-miR-33; mmu-miR-410
Dnajb6	1.365	46	33.6996	mmu-miR-200a; mmu-miR-467e; mmu-miR-130a; mmu-miR-466g; mmu-miR-467c; mmu-miR-130b; mmu-miR-30d; mmu-miR-30a; mmu-miR-181a; mmu-miR-290-3p; mmu-let-7a; mmu-miR-132; mmu-miR-34a; mmu-miR-467a; mmu-miR-30b; mmu-miR-467h; mmu-miR-672; mmu-miR-381; mmu-miR-292-3p; mmu-miR-302a; mmu-let-7g; mmu-miR-302d; mmu-miR-350; mmu-miR-124; mmu-miR-148b; mmu-miR-148a; mmu-miR-484; mmu-miR-295; mmu-miR-23b; mmu-m…
Dnajc1	3.508	35	9.97719	mmu-miR-142-3p; mmu-miR-495; mmu-miR-669l; mmu-miR-804; mmu-miR-760-5p; mmu-miR-466g; mmu-miR-669d; mmu-miR-19a; mmu-miR-669f-5p; mmu-miR-340-5p; mmu-miR-23b; mmu-miR-18b; mmu-miR-376c; mmu-miR-760-3p; mmu-miR-134; mmu-miR-669a-5p; mmu-miR-22; mmu-miR-103; mmu-miR-1224; mmu-miR-142-5p; mmu-miR-421; mmu-miR-23a; mmu-miR-19b; mmu-miR-410; mmu-miR-423-5p
Dnajc22	0.242	4	16.5289	mmu-miR-1983; mmu-miR-1224; mmu-miR-421; mmu-miR-151-5p
Dok1	0.317	4	12.6183	mmu-miR-466a-3p; mmu-miR-495; mmu-miR-713; mmu-miR-423-5p
Dpf1	1.037	16	15.4291	mmu-miR-330; mmu-miR-495; mmu-miR-29c; mmu-miR-29b; mmu-miR-29a; mmu-miR-543; mmu-miR-27a; mmu-miR-1224; mmu-miR-421; mmu-miR-1952; mmu-miR-23b; mmu-miR-762; mmu-miR-1935; mmu-miR-23a; mmu-miR-28
Dph3	2.822	55	19.4897	mmu-miR-145; mmu-miR-93; mmu-miR-713; mmu-miR-466g; mmu-miR-467c; mmu-miR-150; mmu-miR-20a; mmu-miR-340-5p; mmu-miR-30d; mmu-miR-30a; mmu-miR-28; mmu-miR-434-3p; mmu-miR-181a; mmu-miR-205; mmu-miR-155; mmu-let-7a; mmu-miR-132; mmu-miR-27a; mmu-miR-30b; mmu-miR-468; mmu-miR-106a; mmu-miR-17; mmu-miR-202-3p; mmu-let-7g; mmu-miR-142-3p; mmu-miR-148b; mmu-miR-148a; mmu-miR-20b; mmu-miR-23b; mmu-let-7…
Dpp8	1.797	51	28.3806	mmu-miR-200a; mmu-miR-495; mmu-miR-93; mmu-miR-96; mmu-miR-200b; mmu-miR-467c; mmu-miR-20a; mmu-miR-340-5p; mmu-miR-291a-5p; mmu-miR-434-3p; mmu-miR-669o-5p; mmu-miR-181a; mmu-miR-205; mmu-miR-290-3p; mmu-miR-291b-5p; mmu-miR-34a; mmu-miR-467a; mmu-miR-468; mmu-miR-1983; mmu-miR-182; mmu-miR-106a; mmu-miR-17; mmu-miR-292-3p; mmu-miR-154; mmu-miR-302a; mmu-miR-302d; mmu-miR-433; mmu-miR-429; mmu-m…
Dppa3	0.267	10	37.4532	mmu-miR-466c-3p; mmu-miR-495; mmu-miR-29c; mmu-miR-29b; mmu-miR-29a; mmu-miR-23b; mmu-miR-466b-3p; mmu-miR-23a
Dppa4	0.56	9	16.0714	mmu-miR-495; mmu-miR-350; mmu-miR-335-3p; mmu-miR-124; mmu-miR-1198-3p; mmu-miR-103; mmu-miR-1935; mmu-miR-292-5p
Dppa5a	0.184	3	16.3043	mmu-miR-669d; mmu-miR-145; mmu-miR-872
Dpys	0.803	12	14.944	mmu-miR-291b-3p; mmu-miR-152; mmu-miR-155; mmu-miR-148b; mmu-miR-130a; mmu-miR-301a; mmu-miR-148a; mmu-miR-103; mmu-miR-130b; mmu-miR-26b; mmu-miR-421; mmu-miR-26a
Dpysl3	3.353	44	13.1226	mmu-miR-713; mmu-miR-19a; mmu-miR-150; mmu-miR-30d; mmu-miR-30a; mmu-miR-434-3p; mmu-miR-34a; mmu-miR-27a; mmu-miR-30b; mmu-miR-541; mmu-miR-103; mmu-miR-182; mmu-miR-1983; mmu-miR-129-2-3p; mmu-miR-26b; mmu-miR-129-1-3p; mmu-miR-19b; mmu-miR-195; mmu-miR-466a-3p; mmu-miR-124; mmu-miR-136; mmu-miR-16; mmu-miR-762; mmu-miR-1196; mmu-miR-34c; mmu-miR-134; mmu-miR-293; mmu-miR-15a; mmu-miR-378; mmu-…
Dscc1	0.058	4	68.9655	mmu-miR-669f-3p; mmu-miR-381; mmu-miR-340-5p; mmu-miR-142-5p
Dsp	0.645	17	26.3566	mmu-miR-669a-3p; mmu-miR-32; mmu-miR-495; mmu-miR-29b; mmu-miR-466g; mmu-miR-363-3p; mmu-miR-376c; mmu-miR-741; mmu-miR-323-3p; mmu-miR-29a; mmu-miR-29c; mmu-miR-367; mmu-miR-669o-3p; mmu-miR-25; mmu-miR-142-5p; mmu-miR-292-5p
Dtl	3.812	84	22.0357	mmu-miR-495; mmu-miR-93; mmu-miR-804; mmu-miR-713; mmu-miR-96; mmu-miR-466g; mmu-miR-20a; mmu-miR-340-5p; mmu-miR-466b-3p; mmu-miR-30d; mmu-miR-323-3p; mmu-miR-30a; mmu-miR-669f-3p; mmu-miR-191; mmu-miR-468; mmu-miR-106a; mmu-miR-129-2-3p; mmu-miR-17; mmu-miR-672; mmu-miR-129-1-3p; mmu-miR-302a; mmu-miR-466a-3p; mmu-miR-302d; mmu-miR-433; mmu-miR-148b; mmu-miR-669l; mmu-miR-136; mmu-miR-760-5p; m…
Dtx1	1.046	15	14.3403	mmu-miR-195; mmu-miR-1196; mmu-miR-335-5p; mmu-miR-15a; mmu-miR-136; mmu-miR-16; mmu-miR-669d; mmu-miR-484; mmu-miR-150; mmu-miR-674; mmu-miR-467f; mmu-miR-1952; mmu-miR-154; mmu-miR-15b; mmu-miR-377
Dtx4	3.135	44	14.0351	mmu-miR-29b; mmu-miR-804; mmu-miR-335-5p; mmu-miR-431; mmu-miR-150; mmu-miR-296-5p; mmu-miR-434-3p; mmu-miR-205; mmu-miR-29c; mmu-miR-669f-3p; mmu-let-7a; mmu-miR-182; mmu-miR-202-3p; mmu-miR-421; mmu-miR-154; mmu-let-7g; mmu-miR-433; mmu-miR-136; mmu-miR-872; mmu-miR-760-5p; mmu-miR-669d; mmu-miR-484; mmu-miR-762; mmu-miR-376c; mmu-let-7c; mmu-miR-330; mmu-miR-29a; mmu-miR-335-3p; mmu-miR-134; m…
Dusp2	0.581	30	51.6351	mmu-miR-302d; mmu-miR-200a; mmu-miR-29b; mmu-miR-93; mmu-miR-20b; mmu-miR-295; mmu-miR-20a; mmu-miR-340-5p; mmu-miR-28; mmu-miR-141; mmu-miR-29c; mmu-miR-29a; mmu-miR-106b; mmu-miR-106a; mmu-miR-17; mmu-miR-129-2-3p; mmu-miR-291a-3p; mmu-miR-142-5p; mmu-miR-129-1-3p; mmu-miR-302a; mmu-miR-410; mmu-miR-294
Dusp26	0.659	19	28.8316	mmu-miR-136; mmu-miR-125a-5p; mmu-miR-674; mmu-miR-23b; mmu-miR-125b-5p; mmu-miR-377; mmu-miR-34c; mmu-miR-205; mmu-miR-335-3p; mmu-miR-760-3p; mmu-miR-34a; mmu-miR-1198-5p; mmu-miR-193b; mmu-miR-1983; mmu-miR-329; mmu-miR-33; mmu-miR-23a; mmu-miR-423-5p
Dusp27	0.477	11	23.0608	mmu-miR-141; mmu-miR-200a; mmu-miR-142-3p; mmu-miR-669l; mmu-miR-669a-5p; mmu-miR-335-5p; mmu-miR-378; mmu-miR-484; mmu-miR-669f-5p; mmu-miR-674; mmu-miR-672
Dusp4	1.111	26	23.4023	mmu-miR-669a-3p; mmu-miR-145; mmu-miR-669l; mmu-miR-804; mmu-miR-429; mmu-miR-374; mmu-miR-200b; mmu-miR-669f-5p; mmu-miR-150; mmu-miR-369-3p; mmu-miR-296-5p; mmu-miR-377; mmu-miR-669o-5p; mmu-miR-330; mmu-miR-669o-3p; mmu-miR-669a-5p; mmu-miR-27a; mmu-miR-1983; mmu-miR-26b; mmu-miR-200c; mmu-miR-329; mmu-miR-672; mmu-miR-1952; mmu-miR-421; mmu-miR-26a
Dusp9	1.105	21	19.0045	mmu-let-7g; mmu-miR-350; mmu-miR-804; mmu-miR-335-5p; mmu-miR-760-5p; mmu-miR-762; mmu-let-7c; mmu-miR-741; mmu-miR-377; mmu-miR-330; mmu-miR-34c; mmu-miR-205; mmu-let-7a; mmu-miR-132; mmu-miR-34a; mmu-miR-27a; mmu-let-7e; mmu-miR-202-3p; mmu-miR-1952
Dut	1.195	26	21.7573	mmu-miR-29b; mmu-miR-148b; mmu-miR-145; mmu-miR-429; mmu-miR-200b; mmu-miR-148a; mmu-miR-369-3p; mmu-miR-377; mmu-miR-152; mmu-miR-29a; mmu-miR-29c; mmu-miR-543; mmu-miR-27a; mmu-miR-532-5p; mmu-miR-200c; mmu-miR-329; mmu-miR-1952; mmu-miR-33; mmu-miR-1935; mmu-miR-423-5p
Dynll2	1.908	38	19.9161	mmu-miR-1960; mmu-miR-148b; mmu-miR-669l; mmu-miR-713; mmu-miR-130a; mmu-miR-431; mmu-miR-148a; mmu-miR-669f-5p; mmu-miR-130b; mmu-miR-23b; mmu-miR-18b; mmu-miR-30d; mmu-miR-291a-5p; mmu-miR-30a; mmu-miR-330; mmu-miR-152; mmu-miR-181a; mmu-miR-760-3p; mmu-miR-543; mmu-miR-291b-5p; mmu-miR-134; mmu-miR-669a-5p; mmu-miR-30b; mmu-miR-301a; mmu-miR-182; mmu-miR-129-2-3p; mmu-miR-1224; mmu-miR-129-1-3…
Dyrk1a	3.316	72	21.7129	mmu-miR-495; mmu-miR-145; mmu-miR-93; mmu-miR-713; mmu-miR-466g; mmu-miR-150; mmu-miR-369-3p; mmu-miR-20a; mmu-miR-467f; mmu-miR-466b-3p; mmu-miR-291a-5p; mmu-miR-205; mmu-miR-669f-3p; mmu-miR-291b-5p; mmu-let-7a; mmu-miR-27a; mmu-miR-182; mmu-miR-106a; mmu-miR-103; mmu-miR-17; mmu-miR-26b; mmu-miR-421; mmu-miR-381; mmu-miR-1952; mmu-miR-154; mmu-miR-466a-3p; mmu-let-7g; mmu-miR-195; mmu-miR-350;…
Ecd	0.865	22	25.4335	mmu-miR-466a-3p; mmu-miR-302d; mmu-miR-93; mmu-miR-136; mmu-miR-20b; mmu-miR-150; mmu-miR-295; mmu-miR-20a; mmu-miR-23b; mmu-miR-335-3p; mmu-miR-669f-3p; mmu-miR-382; mmu-miR-106b; mmu-miR-182; mmu-miR-106a; mmu-miR-17; mmu-miR-291a-3p; mmu-miR-23a; mmu-miR-302a; mmu-miR-294
Echdc2	0.89	15	16.8539	mmu-miR-34c; mmu-miR-330; mmu-miR-152; mmu-miR-148b; mmu-miR-124; mmu-miR-713; mmu-miR-34a; mmu-miR-136; mmu-miR-125a-5p; mmu-miR-466g; mmu-miR-148a; mmu-miR-103; mmu-miR-125b-5p
Edem2	0.418	3	7.17703	mmu-miR-669o-5p; mmu-miR-1224; mmu-miR-467f
Edn1	1.11	27	24.3243	mmu-miR-466a-3p; mmu-let-7g; mmu-miR-433; mmu-miR-200a; mmu-miR-148b; mmu-miR-124; mmu-miR-125a-5p; mmu-miR-431; mmu-miR-148a; mmu-miR-1198-3p; mmu-miR-125b-5p; mmu-miR-466b-3p; mmu-miR-376c; mmu-let-7c; mmu-miR-101b; mmu-miR-466c-3p; mmu-miR-141; mmu-miR-152; mmu-miR-760-3p; mmu-let-7a; mmu-miR-132; mmu-miR-376b; mmu-let-7e; mmu-miR-202-3p; mmu-miR-421; mmu-miR-33; mmu-miR-410
Ednra	1.945	29	14.91	mmu-miR-195; mmu-miR-433; mmu-miR-467e; mmu-miR-350; mmu-miR-297c; mmu-miR-16; mmu-miR-466g; mmu-miR-150; mmu-miR-674; mmu-miR-369-3p; mmu-miR-669o-5p; mmu-miR-335-3p; mmu-miR-22; mmu-miR-15a; mmu-miR-532-5p; mmu-miR-467h; mmu-miR-183; mmu-miR-468; mmu-miR-26b; mmu-miR-672; mmu-miR-26a; mmu-miR-1935; mmu-miR-297a; mmu-miR-15b; mmu-miR-410
Eef2	0.425	7	16.4706	mmu-miR-484; mmu-miR-34c; mmu-miR-330; mmu-miR-103; mmu-miR-124; mmu-miR-34a; mmu-miR-741
Efemp1	0.425	4	9.41176	mmu-miR-466a-3p; mmu-miR-669f-3p; mmu-miR-329; mmu-miR-381
Efemp2	0.524	17	32.4427	mmu-miR-34c; mmu-miR-205; mmu-miR-713; mmu-miR-34a; mmu-miR-335-5p; mmu-miR-183; mmu-miR-484; mmu-miR-129-2-3p; mmu-miR-674; mmu-miR-154; mmu-miR-23b; mmu-miR-129-1-3p; mmu-miR-23a; mmu-miR-377; mmu-miR-28
Efhd1	1.044	19	18.1992	mmu-miR-466a-3p; mmu-miR-302d; mmu-miR-433; mmu-miR-124; mmu-miR-295; mmu-miR-30d; mmu-miR-30a; mmu-miR-1196; mmu-miR-330; mmu-miR-205; mmu-miR-132; mmu-miR-27a; mmu-miR-378; mmu-miR-30b; mmu-miR-291a-3p; mmu-miR-381; mmu-miR-302a; mmu-miR-294; mmu-miR-423-5p
Egfr	6.303	154	24.4328	mmu-miR-495; mmu-miR-93; mmu-miR-804; mmu-miR-713; mmu-miR-335-5p; mmu-miR-96; mmu-miR-431; mmu-miR-20a; mmu-miR-340-5p; mmu-miR-30d; mmu-miR-30a; mmu-miR-28; mmu-miR-434-3p; mmu-miR-21; mmu-miR-29c; mmu-miR-155; mmu-miR-669f-3p; mmu-miR-367; mmu-let-7a; mmu-miR-468; mmu-miR-106a; mmu-miR-17; mmu-miR-202-3p; mmu-miR-381; mmu-miR-669a-3p; mmu-miR-466a-3p; mmu-let-7g; mmu-miR-195; mmu-miR-433; mmu-…
Egln3	1.643	22	13.3901	mmu-miR-669a-3p; mmu-miR-195; mmu-miR-495; mmu-miR-467e; mmu-miR-136; mmu-miR-16; mmu-miR-1198-3p; mmu-miR-669d; mmu-miR-19a; mmu-miR-291b-3p; mmu-miR-669o-5p; mmu-miR-760-3p; mmu-miR-132; mmu-miR-669o-3p; mmu-miR-99b; mmu-miR-15a; mmu-miR-467h; mmu-miR-103; mmu-miR-142-5p; mmu-miR-15b; mmu-miR-19b; mmu-miR-466f
Egr2	1.2	42	35	mmu-miR-200a; mmu-miR-145; mmu-miR-93; mmu-miR-335-5p; mmu-miR-150; mmu-miR-20a; mmu-miR-467f; mmu-miR-291a-5p; mmu-miR-290-3p; mmu-miR-669f-3p; mmu-miR-367; mmu-miR-291b-5p; mmu-miR-34a; mmu-miR-467a; mmu-miR-191; mmu-miR-106a; mmu-miR-103; mmu-miR-1983; mmu-miR-17; mmu-miR-292-3p; mmu-miR-1952; mmu-miR-32; mmu-miR-142-3p; mmu-miR-124; mmu-miR-148b; mmu-miR-350; mmu-miR-136; mmu-miR-148a; mmu-mi…
Ehbp1l1	0.95	10	10.5263	mmu-miR-330; mmu-miR-1945; mmu-miR-495; mmu-miR-297c; mmu-miR-205; mmu-miR-27a; mmu-miR-142-5p; mmu-miR-421; mmu-miR-762; mmu-miR-297a
Ehd2	3.264	39	11.9485	mmu-miR-200a; mmu-miR-145; mmu-miR-713; mmu-miR-150; mmu-miR-467f; mmu-miR-340-5p; mmu-miR-291a-5p; mmu-miR-181a; mmu-miR-21; mmu-miR-205; mmu-miR-291b-5p; mmu-miR-132; mmu-miR-669o-3p; mmu-miR-34a; mmu-miR-541; mmu-miR-103; mmu-miR-1952; mmu-miR-669a-3p; mmu-miR-433; mmu-miR-1960; mmu-miR-350; mmu-miR-669d; mmu-miR-484; mmu-miR-23b; mmu-miR-762; mmu-miR-101b; mmu-miR-377; mmu-miR-141; mmu-miR-34…
Eid1	1.114	8	7.18133	mmu-miR-141; mmu-miR-200a; mmu-miR-335-3p; mmu-miR-155; mmu-miR-132; mmu-miR-27a; mmu-miR-340-5p; mmu-miR-421
Eif2ak2	2.575	9	3.49515	mmu-miR-543; mmu-miR-96; mmu-miR-1198-3p; mmu-miR-182; mmu-miR-484; mmu-miR-150; mmu-miR-33; mmu-miR-423-5p; mmu-miR-741
Eif2s3x	2.152	37	17.1933	mmu-miR-29b; mmu-miR-804; mmu-miR-713; mmu-miR-669o-5p; mmu-miR-29c; mmu-miR-669f-3p; mmu-let-7a; mmu-miR-27a; mmu-miR-26b; mmu-miR-1952; mmu-let-7g; mmu-miR-195; mmu-miR-466a-3p; mmu-miR-433; mmu-miR-669l; mmu-miR-125a-5p; mmu-miR-16; mmu-miR-669d; mmu-miR-669f-5p; mmu-miR-125b-5p; mmu-let-7c; mmu-miR-741; mmu-miR-330; mmu-miR-29a; mmu-miR-669a-5p; mmu-miR-99b; mmu-miR-15a; mmu-miR-382; mmu-miR-…
Eif2s3y	0.343	10	29.1545	mmu-miR-205; mmu-miR-369-3p; mmu-miR-26b; mmu-miR-200c; mmu-miR-429; mmu-miR-26a; mmu-miR-374; mmu-miR-200b; mmu-miR-466g
Eif3c	0.543	5	9.2081	mmu-miR-713; mmu-miR-381; mmu-miR-22; mmu-miR-1952; mmu-miR-296-5p
Eif4a1	0.614	8	13.0293	mmu-miR-484; mmu-miR-103; mmu-miR-421; mmu-miR-33; mmu-miR-741; mmu-miR-532-5p; mmu-miR-183
Eif4b	1.839	57	30.9951	mmu-miR-467e; mmu-miR-29b; mmu-miR-145; mmu-miR-804; mmu-miR-431; mmu-miR-467c; mmu-miR-150; mmu-miR-340-5p; mmu-miR-291a-5p; mmu-miR-323-3p; mmu-miR-29c; mmu-miR-290-3p; mmu-miR-291b-5p; mmu-miR-467a; mmu-miR-27a; mmu-miR-1198-5p; mmu-miR-467h; mmu-miR-103; mmu-miR-292-3p; mmu-miR-302a; mmu-miR-423-5p; mmu-miR-195; mmu-miR-302d; mmu-miR-148b; mmu-miR-1960; mmu-miR-297c; mmu-miR-16; mmu-miR-760-5…
Eif5b	3.866	114	29.4878	mmu-miR-145; mmu-miR-93; mmu-miR-713; mmu-miR-96; mmu-miR-466g; mmu-miR-431; mmu-miR-20a; mmu-miR-340-5p; mmu-miR-323-3p; mmu-miR-28; mmu-miR-434-3p; mmu-miR-29c; mmu-miR-290-3p; mmu-miR-367; mmu-let-7a; mmu-miR-106a; mmu-miR-17; mmu-miR-202-3p; mmu-miR-381; mmu-miR-292-3p; mmu-miR-669a-3p; mmu-let-7g; mmu-miR-195; mmu-miR-125a-5p; mmu-miR-20b; mmu-miR-23b; mmu-miR-125b-5p; mmu-miR-377; mmu-miR-3…
Elavl3	3.498	43	12.2927	mmu-miR-200a; mmu-miR-713; mmu-miR-96; mmu-miR-466g; mmu-miR-431; mmu-miR-674; mmu-miR-467f; mmu-miR-296-5p; mmu-miR-181a; mmu-miR-205; mmu-miR-132; mmu-miR-182; mmu-miR-26b; mmu-miR-381; mmu-miR-423-5p; mmu-miR-195; mmu-miR-433; mmu-miR-125a-5p; mmu-miR-16; mmu-miR-760-5p; mmu-miR-484; mmu-miR-125b-5p; mmu-miR-762; mmu-miR-376c; mmu-miR-741; mmu-miR-141; mmu-miR-335-3p; mmu-miR-760-3p; mmu-miR-1…
Elf3	0.691	24	34.7323	mmu-miR-145; mmu-miR-669l; mmu-miR-93; mmu-miR-669f-5p; mmu-miR-484; mmu-miR-20b; mmu-miR-674; mmu-miR-20a; mmu-miR-762; mmu-miR-291b-3p; mmu-miR-434-3p; mmu-miR-127; mmu-miR-290-3p; mmu-miR-134; mmu-miR-669a-5p; mmu-miR-467a; mmu-miR-378; mmu-miR-106b; mmu-miR-1198-5p; mmu-miR-106a; mmu-miR-17; mmu-miR-142-5p; mmu-miR-1952; mmu-miR-292-3p
Elk3	2.596	47	18.1048	mmu-miR-200a; mmu-miR-495; mmu-miR-93; mmu-miR-335-5p; mmu-miR-200b; mmu-miR-466g; mmu-miR-19a; mmu-miR-150; mmu-miR-674; mmu-miR-20a; mmu-miR-28; mmu-miR-669f-3p; mmu-miR-468; mmu-miR-106a; mmu-miR-103; mmu-miR-129-2-3p; mmu-miR-17; mmu-miR-26b; mmu-miR-672; mmu-miR-129-1-3p; mmu-miR-423-5p; mmu-miR-19b; mmu-miR-124; mmu-miR-297c; mmu-miR-429; mmu-miR-760-5p; mmu-miR-20b; mmu-miR-741; mmu-miR-37…
Elk4	2.797	97	34.68	mmu-miR-93; mmu-miR-713; mmu-miR-466g; mmu-miR-467c; mmu-miR-19a; mmu-miR-20a; mmu-miR-290-3p; mmu-miR-669f-3p; mmu-miR-367; mmu-let-7a; mmu-miR-541; mmu-miR-106a; mmu-miR-17; mmu-miR-672; mmu-miR-292-3p; mmu-miR-154; mmu-miR-302a; mmu-miR-302d; mmu-let-7g; mmu-miR-124; mmu-miR-669l; mmu-miR-125a-5p; mmu-miR-669f-5p; mmu-miR-20b; mmu-miR-295; mmu-miR-125b-5p; mmu-miR-377; mmu-miR-34c; mmu-miR-330…
Ell2	1.56	43	27.5641	mmu-miR-200a; mmu-miR-495; mmu-miR-96; mmu-miR-200b; mmu-miR-431; mmu-miR-19a; mmu-miR-467f; mmu-miR-30d; mmu-miR-323-3p; mmu-miR-30a; mmu-miR-181a; mmu-miR-155; mmu-miR-669f-3p; mmu-miR-669o-3p; mmu-miR-27a; mmu-miR-30b; mmu-miR-182; mmu-miR-1983; mmu-miR-381; mmu-miR-154; mmu-miR-19b; mmu-miR-669a-3p; mmu-miR-195; mmu-miR-466a-3p; mmu-miR-124; mmu-miR-429; mmu-miR-872; mmu-miR-16; mmu-miR-23b; …
Elmo3	0.746	13	17.4263	mmu-let-7g; mmu-miR-297c; mmu-miR-543; mmu-miR-134; mmu-let-7a; mmu-miR-760-5p; mmu-miR-1198-3p; mmu-let-7e; mmu-miR-103; mmu-miR-1983; mmu-miR-421; mmu-miR-297a; mmu-let-7c
Elovl7	4.424	97	21.9259	mmu-miR-495; mmu-miR-145; mmu-miR-713; mmu-miR-96; mmu-miR-431; mmu-miR-340-5p; mmu-miR-466b-3p; mmu-miR-30d; mmu-miR-323-3p; mmu-miR-30a; mmu-miR-434-3p; mmu-miR-21; mmu-miR-669f-3p; mmu-miR-367; mmu-let-7a; mmu-miR-129-2-3p; mmu-miR-202-3p; mmu-miR-381; mmu-miR-129-1-3p; mmu-miR-302a; mmu-miR-669a-3p; mmu-miR-466a-3p; mmu-miR-302d; mmu-let-7g; mmu-miR-148b; mmu-miR-669l; mmu-miR-136; mmu-miR-12…
Eme1	0.433	9	20.7852	mmu-miR-1196; mmu-miR-433; mmu-miR-330; mmu-miR-335-3p; mmu-miR-297c; mmu-miR-22; mmu-miR-674; mmu-miR-1952; mmu-miR-297a
Emilin2	0.58	30	51.7241	mmu-miR-302d; mmu-miR-200a; mmu-miR-713; mmu-miR-130a; mmu-miR-467c; mmu-miR-19a; mmu-miR-484; mmu-miR-130b; mmu-miR-295; mmu-miR-762; mmu-miR-296-5p; mmu-miR-741; mmu-miR-1196; mmu-miR-141; mmu-miR-291b-3p; mmu-miR-290-3p; mmu-miR-293; mmu-miR-467a; mmu-miR-301a; mmu-miR-193b; mmu-miR-291a-3p; mmu-miR-292-3p; mmu-miR-302a; mmu-miR-19b; mmu-miR-294
Eml2	0.767	5	6.5189	mmu-miR-330; mmu-miR-103; mmu-miR-150; mmu-miR-713; mmu-miR-296-5p
Enah	9.476	170	17.9401	mmu-miR-495; mmu-miR-145; mmu-miR-93; mmu-miR-804; mmu-miR-713; mmu-miR-335-5p; mmu-miR-96; mmu-miR-466g; mmu-miR-467c; mmu-miR-20a; mmu-miR-340-5p; mmu-miR-30d; mmu-miR-30a; mmu-miR-434-3p; mmu-miR-290-3p; mmu-miR-155; mmu-miR-669f-3p; mmu-miR-541; mmu-miR-468; mmu-miR-106a; mmu-miR-17; mmu-miR-129-2-3p; mmu-miR-672; mmu-miR-381; mmu-miR-292-3p; mmu-miR-129-1-3p; mmu-miR-302a; mmu-miR-302d; mmu-…
Endod1	2.692	68	25.26	mmu-miR-495; mmu-miR-29b; mmu-miR-145; mmu-miR-93; mmu-miR-713; mmu-miR-150; mmu-miR-20a; mmu-miR-340-5p; mmu-miR-434-3p; mmu-miR-669o-5p; mmu-miR-21; mmu-miR-29c; mmu-miR-205; mmu-miR-155; mmu-miR-543; mmu-miR-132; mmu-miR-27a; mmu-miR-468; mmu-miR-106a; mmu-miR-103; mmu-miR-17; mmu-miR-129-2-3p; mmu-miR-1952; mmu-miR-129-1-3p; mmu-miR-302a; mmu-miR-423-5p; mmu-miR-302d; mmu-miR-195; mmu-miR-124…
Enox1	0.816	21	25.7353	mmu-miR-466a-3p; mmu-miR-195; mmu-miR-124; mmu-miR-16; mmu-miR-674; mmu-miR-466b-3p; mmu-miR-323-3p; mmu-miR-466c-3p; mmu-miR-335-3p; mmu-miR-15a; mmu-miR-103; mmu-miR-376b; mmu-miR-26b; mmu-miR-26a; mmu-miR-1935; mmu-miR-15b; mmu-miR-410
Enpp1	3.892	52	13.3607	mmu-miR-495; mmu-miR-93; mmu-miR-804; mmu-miR-96; mmu-miR-200b; mmu-miR-674; mmu-miR-20a; mmu-miR-30d; mmu-miR-30a; mmu-miR-28; mmu-miR-205; mmu-miR-155; mmu-miR-34a; mmu-miR-30b; mmu-miR-1198-5p; mmu-miR-106a; mmu-miR-1983; mmu-miR-17; mmu-miR-302a; mmu-miR-423-5p; mmu-miR-302d; mmu-miR-297c; mmu-miR-669l; mmu-miR-429; mmu-miR-136; mmu-miR-125a-5p; mmu-miR-669d; mmu-miR-669f-5p; mmu-miR-20b; mmu…
Eomes	1.12	31	27.6786	mmu-miR-32; mmu-miR-467e; mmu-miR-29b; mmu-miR-1198-3p; mmu-miR-484; mmu-miR-363-3p; mmu-miR-18b; mmu-miR-23b; mmu-miR-762; mmu-miR-291a-5p; mmu-miR-323-3p; mmu-miR-434-3p; mmu-miR-669o-5p; mmu-miR-34c; mmu-miR-330; mmu-miR-155; mmu-miR-29a; mmu-miR-29c; mmu-miR-335-3p; mmu-miR-367; mmu-miR-291b-5p; mmu-miR-34a; mmu-miR-467h; mmu-miR-25; mmu-miR-468; mmu-miR-376b; mmu-miR-1935; mmu-miR-23a
Epb4.1l5	5.137	84	16.352	mmu-miR-495; mmu-miR-145; mmu-miR-93; mmu-miR-713; mmu-miR-466g; mmu-miR-467c; mmu-miR-20a; mmu-miR-340-5p; mmu-miR-323-3p; mmu-miR-21; mmu-miR-290-3p; mmu-miR-155; mmu-miR-669f-3p; mmu-miR-541; mmu-miR-106a; mmu-miR-17; mmu-miR-672; mmu-miR-292-3p; mmu-miR-302a; mmu-miR-669a-3p; mmu-miR-466a-3p; mmu-miR-195; mmu-miR-302d; mmu-miR-669l; mmu-miR-669f-5p; mmu-miR-20b; mmu-miR-295; mmu-miR-23b; mmu-…
Epc2	1.95	62	31.7949	mmu-miR-495; mmu-miR-467e; mmu-miR-804; mmu-miR-713; mmu-miR-130a; mmu-miR-19a; mmu-miR-130b; mmu-miR-150; mmu-miR-674; mmu-miR-340-5p; mmu-miR-466b-3p; mmu-miR-30d; mmu-miR-323-3p; mmu-miR-30a; mmu-miR-181a; mmu-miR-669f-3p; mmu-miR-543; mmu-miR-367; mmu-let-7a; mmu-miR-30b; mmu-miR-467h; mmu-miR-468; mmu-miR-103; mmu-miR-26b; mmu-miR-302a; mmu-miR-19b; mmu-miR-466a-3p; mmu-let-7g; mmu-miR-302d;…
Epcam	0.637	7	10.989	mmu-miR-466a-3p; mmu-miR-495; mmu-miR-350; mmu-miR-291b-5p; mmu-miR-467f; mmu-miR-291a-5p
Epha1	0.281	8	28.4698	mmu-miR-466c-3p; mmu-miR-434-3p; mmu-miR-669f-3p; mmu-miR-467f; mmu-miR-340-5p; mmu-miR-142-5p; mmu-miR-466b-3p; mmu-miR-136
Ephx2	0.305	3	9.83607	mmu-miR-335-3p; mmu-miR-145; mmu-miR-532-5p
Eps15	2.352	74	31.4626	mmu-miR-495; mmu-miR-467e; mmu-miR-29b; mmu-miR-145; mmu-miR-335-5p; mmu-miR-96; mmu-miR-130a; mmu-miR-200b; mmu-miR-19a; mmu-miR-130b; mmu-miR-674; mmu-miR-467f; mmu-miR-466b-3p; mmu-miR-181a; mmu-miR-29c; mmu-miR-205; mmu-miR-669f-3p; mmu-let-7a; mmu-miR-467h; mmu-miR-103; mmu-miR-182; mmu-miR-129-2-3p; mmu-miR-26b; mmu-miR-202-3p; mmu-miR-421; mmu-miR-381; mmu-miR-154; mmu-miR-129-1-3p; mmu-mi…
Erap1	1.146	33	28.7958	mmu-miR-495; mmu-miR-467e; mmu-miR-29b; mmu-miR-200b; mmu-miR-467c; mmu-miR-28; mmu-miR-434-3p; mmu-miR-290-3p; mmu-miR-29c; mmu-miR-669f-3p; mmu-miR-467a; mmu-miR-27a; mmu-miR-467h; mmu-miR-468; mmu-miR-182; mmu-miR-26b; mmu-miR-421; mmu-miR-381; mmu-miR-292-3p; mmu-miR-302a; mmu-miR-302d; mmu-miR-429; mmu-miR-760-5p; mmu-miR-295; mmu-miR-291b-3p; mmu-miR-29a; mmu-miR-760-3p; mmu-miR-532-5p; mmu…
Eras	0.216	1	4.62963	mmu-miR-760-5p
Erbb3	1.845	22	11.9241	mmu-miR-350; mmu-miR-297c; mmu-miR-93; mmu-miR-713; mmu-miR-136; mmu-miR-484; mmu-miR-20b; mmu-miR-150; mmu-miR-20a; mmu-miR-340-5p; mmu-miR-376c; mmu-miR-30d; mmu-miR-30a; mmu-miR-106b; mmu-miR-1198-5p; mmu-miR-30b; mmu-miR-106a; mmu-miR-17; mmu-miR-1224; mmu-miR-329; mmu-miR-142-5p; mmu-miR-297a
Ercc6l	1.463	22	15.0376	mmu-miR-200a; mmu-miR-142-3p; mmu-miR-350; mmu-miR-93; mmu-miR-20b; mmu-miR-150; mmu-miR-674; mmu-miR-20a; mmu-miR-101b; mmu-miR-141; mmu-miR-291b-3p; mmu-miR-290-3p; mmu-miR-22; mmu-miR-293; mmu-miR-467a; mmu-miR-378; mmu-miR-106b; mmu-miR-106a; mmu-miR-103; mmu-miR-1983; mmu-miR-17; mmu-miR-292-3p
Espl1	0.141	7	49.6454	mmu-let-7g; mmu-let-7e; mmu-let-7a; mmu-miR-23b; mmu-miR-23a; mmu-let-7c; mmu-miR-377
Etv4	0.624	8	12.8205	mmu-miR-541; mmu-miR-330; mmu-miR-1983; mmu-miR-150; mmu-miR-760-3p; mmu-miR-431; mmu-miR-183
Etv5	2.161	27	12.4942	mmu-miR-495; mmu-miR-467e; mmu-miR-1960; mmu-miR-713; mmu-miR-136; mmu-miR-1198-3p; mmu-miR-467f; mmu-miR-377; mmu-miR-1196; mmu-miR-434-3p; mmu-miR-330; mmu-miR-34c; mmu-miR-760-3p; mmu-miR-34a; mmu-miR-532-5p; mmu-miR-193b; mmu-miR-467h; mmu-miR-1983; mmu-miR-672; mmu-miR-33; mmu-miR-410
Evx1	1.279	30	23.4558	mmu-miR-669a-3p; mmu-miR-466a-3p; mmu-miR-32; mmu-miR-200a; mmu-miR-495; mmu-miR-350; mmu-miR-484; mmu-miR-363-3p; mmu-miR-467f; mmu-miR-762; mmu-miR-466b-3p; mmu-miR-741; mmu-miR-466c-3p; mmu-miR-141; mmu-miR-434-3p; mmu-miR-181a; mmu-miR-543; mmu-miR-367; mmu-miR-669o-3p; mmu-miR-22; mmu-miR-382; mmu-miR-193b; mmu-miR-25; mmu-miR-1952; mmu-miR-33; mmu-miR-421; mmu-miR-292-5p; mmu-miR-423-5p
Ewsr1	0.375	5	13.3333	mmu-miR-142-3p; mmu-miR-340-5p; mmu-miR-33; mmu-miR-374
Exo1	4.924	54	10.9667	mmu-miR-200a; mmu-miR-145; mmu-miR-804; mmu-miR-130a; mmu-miR-130b; mmu-miR-369-3p; mmu-miR-466b-3p; mmu-miR-28; mmu-miR-434-3p; mmu-miR-669o-5p; mmu-miR-669f-3p; mmu-miR-34a; mmu-miR-27a; mmu-miR-103; mmu-miR-381; mmu-miR-1952; mmu-miR-423-5p; mmu-miR-466a-3p; mmu-miR-195; mmu-miR-433; mmu-miR-350; mmu-miR-136; mmu-miR-125a-5p; mmu-miR-16; mmu-miR-374; mmu-miR-669d; mmu-miR-484; mmu-miR-125b-5p;…
Eya2	0.613	9	14.6819	mmu-miR-330; mmu-miR-124; mmu-miR-30b; mmu-miR-532-5p; mmu-miR-1198-3p; mmu-miR-296-5p; mmu-miR-30d; mmu-miR-30a
F2r	1.929	29	15.0337	mmu-miR-466a-3p; mmu-miR-29b; mmu-miR-297c; mmu-miR-145; mmu-miR-429; mmu-miR-335-5p; mmu-miR-200b; mmu-miR-23b; mmu-miR-376c; mmu-miR-155; mmu-miR-29a; mmu-miR-29c; mmu-miR-335-3p; mmu-miR-134; mmu-miR-191; mmu-miR-532-5p; mmu-miR-182; mmu-miR-200c; mmu-miR-329; mmu-miR-297a; mmu-miR-23a
F3	0.809	31	38.3189	mmu-miR-302d; mmu-miR-142-3p; mmu-miR-350; mmu-miR-93; mmu-miR-19a; mmu-miR-484; mmu-miR-20b; mmu-miR-295; mmu-miR-20a; mmu-miR-340-5p; mmu-miR-291a-5p; mmu-miR-434-3p; mmu-miR-34c; mmu-miR-669f-3p; mmu-miR-291b-5p; mmu-miR-34a; mmu-miR-106b; mmu-miR-106a; mmu-miR-17; mmu-miR-291a-3p; mmu-miR-381; mmu-miR-154; mmu-miR-292-5p; mmu-miR-302a; mmu-miR-410; mmu-miR-19b; mmu-miR-294
Fabp3	0.238	7	29.4118	mmu-miR-466a-3p; mmu-miR-103; mmu-miR-467f; mmu-miR-381; mmu-miR-376c; mmu-miR-1935; mmu-miR-423-5p
Faim2	3.143	48	15.272	mmu-miR-29b; mmu-miR-713; mmu-miR-96; mmu-miR-466g; mmu-miR-296-5p; mmu-miR-669o-5p; mmu-miR-29c; mmu-miR-205; mmu-miR-34a; mmu-miR-27a; mmu-miR-1983; mmu-miR-103; mmu-miR-182; mmu-miR-129-2-3p; mmu-miR-26b; mmu-miR-1952; mmu-miR-129-1-3p; mmu-miR-423-5p; mmu-miR-124; mmu-miR-148b; mmu-miR-1960; mmu-miR-136; mmu-miR-125a-5p; mmu-miR-760-5p; mmu-miR-148a; mmu-miR-669d; mmu-miR-125b-5p; mmu-miR-762…
Fam101a	0.942	13	13.8004	mmu-miR-330; mmu-miR-29c; mmu-miR-29b; mmu-miR-29a; mmu-miR-335-5p; mmu-miR-378; mmu-miR-27a; mmu-miR-1198-5p; mmu-miR-669d; mmu-miR-150; mmu-miR-672; mmu-miR-1952; mmu-miR-376c
Fam102b	4.303	82	19.0565	mmu-miR-29b; mmu-miR-145; mmu-miR-804; mmu-miR-713; mmu-miR-130a; mmu-miR-200b; mmu-miR-431; mmu-miR-19a; mmu-miR-130b; mmu-miR-674; mmu-miR-467f; mmu-miR-340-5p; mmu-miR-30d; mmu-miR-291a-5p; mmu-miR-30a; mmu-miR-669o-5p; mmu-miR-21; mmu-miR-181a; mmu-miR-29c; mmu-miR-205; mmu-miR-543; mmu-miR-291b-5p; mmu-let-7a; mmu-miR-132; mmu-miR-34a; mmu-miR-30b; mmu-miR-1198-5p; mmu-miR-103; mmu-miR-26b; …
Fam110a	0.56	15	26.7857	mmu-miR-302d; mmu-miR-34c; mmu-miR-495; mmu-miR-34a; mmu-miR-96; mmu-miR-378; mmu-miR-182; mmu-miR-291a-3p; mmu-miR-674; mmu-miR-295; mmu-miR-672; mmu-miR-302a; mmu-miR-28; mmu-miR-294
Fam115a	2.346	33	14.0665	mmu-miR-466a-3p; mmu-miR-467e; mmu-miR-350; mmu-miR-297c; mmu-miR-429; mmu-miR-136; mmu-miR-200b; mmu-miR-466g; mmu-miR-669d; mmu-miR-340-5p; mmu-miR-23b; mmu-miR-466b-3p; mmu-miR-376c; mmu-miR-101b; mmu-miR-466c-3p; mmu-miR-181a; mmu-miR-335-3p; mmu-miR-543; mmu-miR-378; mmu-miR-467h; mmu-miR-200c; mmu-miR-26b; mmu-miR-142-5p; mmu-miR-1935; mmu-miR-26a; mmu-miR-297a; mmu-miR-23a; mmu-miR-410
Fam120a	1.577	50	31.7058	mmu-miR-93; mmu-miR-335-5p; mmu-miR-96; mmu-miR-130a; mmu-miR-130b; mmu-miR-20a; mmu-miR-340-5p; mmu-miR-291a-5p; mmu-miR-323-3p; mmu-miR-669o-5p; mmu-miR-21; mmu-miR-205; mmu-miR-291b-5p; mmu-miR-34a; mmu-miR-1198-5p; mmu-miR-106a; mmu-miR-182; mmu-miR-17; mmu-miR-124; mmu-miR-350; mmu-miR-669l; mmu-miR-669f-5p; mmu-miR-20b; mmu-miR-23b; mmu-miR-741; mmu-miR-101b; mmu-miR-291b-3p; mmu-miR-34c; m…
Fam13b	0.29	19	65.5172	mmu-miR-302d; mmu-miR-145; mmu-miR-93; mmu-miR-125a-5p; mmu-miR-669d; mmu-miR-484; mmu-miR-20b; mmu-miR-295; mmu-miR-20a; mmu-miR-125b-5p; mmu-miR-205; mmu-miR-106b; mmu-miR-106a; mmu-miR-17; mmu-miR-291a-3p; mmu-miR-1952; mmu-miR-142-5p; mmu-miR-302a; mmu-miR-294
Fam160a2	7.56	144	19.0476	mmu-miR-145; mmu-miR-804; mmu-miR-713; mmu-miR-96; mmu-miR-466g; mmu-miR-431; mmu-miR-340-5p; mmu-miR-30d; mmu-miR-296-5p; mmu-miR-30a; mmu-miR-290-3p; mmu-miR-155; mmu-miR-669f-3p; mmu-miR-367; mmu-miR-129-2-3p; mmu-miR-672; mmu-miR-292-3p; mmu-miR-154; mmu-miR-129-1-3p; mmu-miR-302a; mmu-miR-302d; mmu-miR-195; mmu-miR-433; mmu-miR-124; mmu-miR-148b; mmu-miR-125a-5p; mmu-miR-760-5p; mmu-miR-148a…
Fam161a	1.887	46	24.3773	mmu-miR-495; mmu-miR-29b; mmu-miR-96; mmu-miR-130a; mmu-miR-200b; mmu-miR-130b; mmu-miR-369-3p; mmu-miR-291a-5p; mmu-miR-29c; mmu-miR-669f-3p; mmu-miR-291b-5p; mmu-miR-27a; mmu-miR-1198-5p; mmu-miR-182; mmu-miR-381; mmu-miR-1952; mmu-miR-466a-3p; mmu-miR-297c; mmu-miR-429; mmu-miR-136; mmu-miR-374; mmu-miR-669d; mmu-miR-484; mmu-miR-1196; mmu-miR-29a; mmu-miR-760-3p; mmu-miR-301a; mmu-miR-183; mm…
Fam168a	5.623	129	22.9415	mmu-miR-495; mmu-miR-145; mmu-miR-93; mmu-miR-804; mmu-miR-713; mmu-miR-335-5p; mmu-miR-96; mmu-miR-466g; mmu-miR-431; mmu-miR-467c; mmu-miR-19a; mmu-miR-20a; mmu-miR-340-5p; mmu-miR-28; mmu-miR-434-3p; mmu-miR-290-3p; mmu-miR-541; mmu-miR-468; mmu-miR-106a; mmu-miR-17; mmu-miR-292-3p; mmu-miR-154; mmu-miR-302a; mmu-miR-302d; mmu-miR-195; mmu-miR-669l; mmu-miR-136; mmu-miR-125a-5p; mmu-miR-760-5p…
Fam169a	2.483	70	28.1917	mmu-miR-495; mmu-miR-145; mmu-miR-96; mmu-miR-130a; mmu-miR-200b; mmu-miR-467c; mmu-miR-130b; mmu-miR-467f; mmu-miR-466b-3p; mmu-miR-291a-5p; mmu-miR-28; mmu-miR-181a; mmu-miR-205; mmu-miR-290-3p; mmu-miR-669f-3p; mmu-miR-543; mmu-miR-291b-5p; mmu-miR-132; mmu-miR-669o-3p; mmu-miR-467a; mmu-miR-27a; mmu-miR-468; mmu-miR-182; mmu-miR-381; mmu-miR-292-3p; mmu-miR-1952; mmu-miR-302a; mmu-miR-423-5p;…
Fam20a	0.41	6	14.6341	mmu-miR-495; mmu-miR-124; mmu-miR-291b-5p; mmu-miR-713; mmu-miR-378; mmu-miR-291a-5p
Fam20c	1.174	24	20.4429	mmu-miR-433; mmu-miR-124; mmu-miR-669l; mmu-miR-804; mmu-miR-713; mmu-miR-136; mmu-miR-669f-5p; mmu-miR-484; mmu-miR-291a-5p; mmu-miR-205; mmu-miR-760-3p; mmu-miR-291b-5p; mmu-miR-22; mmu-miR-669a-5p; mmu-miR-27a; mmu-miR-423-3p; mmu-miR-1983; mmu-miR-103; mmu-miR-1952; mmu-miR-292-5p; mmu-miR-466f
Fam3c	1.929	32	16.5889	mmu-miR-200a; mmu-miR-200b; mmu-miR-431; mmu-miR-674; mmu-miR-30d; mmu-miR-30a; mmu-miR-669o-5p; mmu-miR-132; mmu-miR-34a; mmu-miR-27a; mmu-miR-30b; mmu-miR-541; mmu-miR-421; mmu-miR-195; mmu-miR-433; mmu-miR-1960; mmu-miR-429; mmu-miR-125a-5p; mmu-miR-16; mmu-miR-125b-5p; mmu-miR-23b; mmu-miR-151-5p; mmu-miR-377; mmu-miR-741; mmu-miR-141; mmu-miR-34c; mmu-miR-335-3p; mmu-miR-15a; mmu-miR-183; mm…
Fam46a	4.018	103	25.6346	mmu-miR-495; mmu-miR-145; mmu-miR-93; mmu-miR-804; mmu-miR-96; mmu-miR-431; mmu-miR-20a; mmu-miR-340-5p; mmu-miR-466b-3p; mmu-miR-29c; mmu-miR-290-3p; mmu-miR-155; mmu-miR-541; mmu-miR-468; mmu-miR-106a; mmu-miR-17; mmu-miR-292-3p; mmu-miR-154; mmu-miR-302a; mmu-miR-302d; mmu-miR-195; mmu-miR-148b; mmu-miR-669l; mmu-miR-125a-5p; mmu-miR-148a; mmu-miR-669f-5p; mmu-miR-20b; mmu-miR-295; mmu-miR-125…
Fam60a	1.836	50	27.2331	mmu-miR-495; mmu-miR-29b; mmu-miR-93; mmu-miR-804; mmu-miR-674; mmu-miR-20a; mmu-miR-669o-5p; mmu-miR-21; mmu-miR-29c; mmu-miR-205; mmu-miR-669o-3p; mmu-miR-34a; mmu-miR-541; mmu-miR-106a; mmu-miR-17; mmu-miR-202-3p; mmu-miR-672; mmu-miR-1952; mmu-miR-302a; mmu-miR-302d; mmu-miR-669a-3p; mmu-miR-433; mmu-miR-297c; mmu-miR-350; mmu-miR-669l; mmu-miR-374; mmu-miR-760-5p; mmu-miR-669f-5p; mmu-miR-20…
Fam69b	0.146	6	41.0959	mmu-miR-466c-3p; mmu-miR-142-3p; mmu-miR-466b-3p; mmu-miR-296-5p; mmu-miR-423-5p
Fam89a	0.787	24	30.4956	mmu-miR-466a-3p; mmu-miR-195; mmu-miR-29b; mmu-miR-1960; mmu-miR-148b; mmu-miR-669l; mmu-miR-16; mmu-miR-466g; mmu-miR-148a; mmu-miR-669f-5p; mmu-miR-674; mmu-miR-30d; mmu-miR-30a; mmu-miR-152; mmu-miR-181a; mmu-miR-205; mmu-miR-29a; mmu-miR-29c; mmu-miR-669f-3p; mmu-miR-669a-5p; mmu-miR-15a; mmu-miR-30b; mmu-miR-103; mmu-miR-15b
Fancd2	1.667	30	17.9964	mmu-miR-302d; mmu-miR-1960; mmu-miR-145; mmu-miR-93; mmu-miR-466g; mmu-miR-20b; mmu-miR-295; mmu-miR-20a; mmu-miR-340-5p; mmu-miR-23b; mmu-miR-330; mmu-miR-106b; mmu-miR-1983; mmu-miR-106a; mmu-miR-17; mmu-miR-291a-3p; mmu-miR-33; mmu-miR-1935; mmu-miR-23a; mmu-miR-292-5p; mmu-miR-302a; mmu-miR-294
Fanci	3.249	81	24.9307	mmu-miR-93; mmu-miR-713; mmu-miR-20a; mmu-miR-30d; mmu-miR-30a; mmu-miR-28; mmu-miR-29c; mmu-let-7a; mmu-miR-191; mmu-miR-541; mmu-miR-106a; mmu-miR-17; mmu-miR-129-2-3p; mmu-miR-129-1-3p; mmu-let-7g; mmu-miR-195; mmu-miR-433; mmu-miR-124; mmu-miR-148b; mmu-miR-760-5p; mmu-miR-148a; mmu-miR-20b; mmu-miR-23b; mmu-miR-377; mmu-miR-152; mmu-miR-1945; mmu-miR-335-3p; mmu-miR-22; mmu-miR-15a; mmu-let-…
Fas	0.446	17	38.1166	mmu-miR-466a-3p; mmu-let-7g; mmu-miR-200a; mmu-miR-374; mmu-miR-484; mmu-miR-674; mmu-miR-467f; mmu-miR-23b; mmu-miR-376c; mmu-let-7c; mmu-miR-141; mmu-let-7a; mmu-let-7e; mmu-miR-376b; mmu-miR-202-3p; mmu-miR-329; mmu-miR-23a
Fbln2	0.661	11	16.6415	mmu-miR-152; mmu-miR-1960; mmu-miR-148b; mmu-miR-145; mmu-miR-22; mmu-miR-466g; mmu-miR-148a; mmu-miR-541; mmu-miR-1983; mmu-miR-1224
Fbln5	4.177	91	21.786	mmu-miR-93; mmu-miR-96; mmu-miR-467c; mmu-miR-369-3p; mmu-miR-20a; mmu-miR-340-5p; mmu-miR-466b-3p; mmu-miR-30d; mmu-miR-30a; mmu-miR-28; mmu-miR-669o-5p; mmu-miR-205; mmu-miR-290-3p; mmu-miR-543; mmu-miR-367; mmu-miR-132; mmu-miR-669o-3p; mmu-miR-467a; mmu-miR-27a; mmu-miR-30b; mmu-miR-1198-5p; mmu-miR-468; mmu-miR-106a; mmu-miR-17; mmu-miR-202-3p; mmu-miR-672; mmu-miR-292-3p; mmu-miR-302a; mmu-…
Fbn2	1.635	31	18.9602	mmu-miR-200a; mmu-miR-495; mmu-miR-335-5p; mmu-miR-130a; mmu-miR-431; mmu-miR-19a; mmu-miR-130b; mmu-miR-674; mmu-miR-467f; mmu-miR-340-5p; mmu-miR-23b; mmu-miR-30d; mmu-miR-296-5p; mmu-miR-291a-5p; mmu-miR-30a; mmu-miR-141; mmu-miR-181a; mmu-miR-21; mmu-miR-291b-5p; mmu-miR-376a; mmu-miR-30b; mmu-miR-301a; mmu-miR-532-5p; mmu-miR-183; mmu-miR-329; mmu-miR-23a; mmu-miR-19b
Fbxo5	0.411	12	29.1971	mmu-miR-350; mmu-miR-335-3p; mmu-miR-145; mmu-miR-429; mmu-miR-96; mmu-miR-27a; mmu-miR-200b; mmu-miR-1198-5p; mmu-miR-182; mmu-miR-200c; mmu-miR-23b; mmu-miR-23a
Fem1b	4.261	106	24.8768	mmu-miR-145; mmu-miR-93; mmu-miR-20a; mmu-miR-466b-3p; mmu-miR-28; mmu-miR-669f-3p; mmu-miR-367; mmu-miR-191; mmu-miR-541; mmu-miR-106a; mmu-miR-17; mmu-miR-129-2-3p; mmu-miR-672; mmu-miR-129-1-3p; mmu-miR-466a-3p; mmu-miR-195; mmu-miR-433; mmu-miR-148b; mmu-miR-669l; mmu-miR-136; mmu-miR-1198-3p; mmu-miR-148a; mmu-miR-669f-5p; mmu-miR-20b; mmu-miR-466c-3p; mmu-miR-152; mmu-miR-335-3p; mmu-miR-13…
Fes	0.174	6	34.4828	mmu-miR-669o-5p; mmu-miR-669f-5p; mmu-miR-669l; mmu-miR-669a-5p; mmu-miR-382; mmu-miR-136
Fez1	1.358	30	22.0913	mmu-miR-669a-3p; mmu-miR-142-3p; mmu-miR-297c; mmu-miR-713; mmu-miR-96; mmu-miR-872; mmu-miR-125a-5p; mmu-miR-466g; mmu-miR-674; mmu-miR-467f; mmu-miR-340-5p; mmu-miR-125b-5p; mmu-miR-762; mmu-miR-741; mmu-miR-323-3p; mmu-miR-330; mmu-miR-669o-3p; mmu-miR-27a; mmu-miR-532-5p; mmu-miR-182; mmu-miR-468; mmu-miR-1224; mmu-miR-672; mmu-miR-1952; mmu-miR-297a
Fgd2	1.705	18	10.5572	mmu-miR-433; mmu-miR-145; mmu-miR-96; mmu-miR-125a-5p; mmu-miR-760-5p; mmu-miR-484; mmu-miR-674; mmu-miR-125b-5p; mmu-miR-376c; mmu-miR-377; mmu-miR-34c; mmu-miR-205; mmu-miR-132; mmu-miR-34a; mmu-miR-193b; mmu-miR-423-3p; mmu-miR-1983; mmu-miR-329
Fgf10	2.799	67	23.9371	mmu-miR-495; mmu-miR-145; mmu-miR-130a; mmu-miR-200b; mmu-miR-466g; mmu-miR-431; mmu-miR-19a; mmu-miR-130b; mmu-miR-674; mmu-miR-467f; mmu-miR-466b-3p; mmu-miR-30d; mmu-miR-291a-5p; mmu-miR-323-3p; mmu-miR-30a; mmu-miR-669o-5p; mmu-miR-181a; mmu-miR-669f-3p; mmu-miR-543; mmu-miR-367; mmu-miR-291b-5p; mmu-miR-132; mmu-miR-30b; mmu-miR-1198-5p; mmu-miR-468; mmu-miR-103; mmu-miR-421; mmu-miR-302a; m…
Fgf15	1.005	24	23.8806	mmu-miR-466a-3p; mmu-miR-302d; mmu-miR-433; mmu-miR-350; mmu-miR-136; mmu-miR-467c; mmu-miR-150; mmu-miR-295; mmu-miR-340-5p; mmu-miR-28; mmu-miR-291b-3p; mmu-miR-330; mmu-miR-205; mmu-miR-290-3p; mmu-miR-22; mmu-miR-467a; mmu-miR-27a; mmu-miR-291a-3p; mmu-miR-142-5p; mmu-miR-292-3p; mmu-miR-302a; mmu-miR-423-5p; mmu-miR-294
Fgf17	0.525	8	15.2381	mmu-miR-669d; mmu-miR-142-3p; mmu-miR-720; mmu-miR-125b-5p; mmu-miR-762; mmu-miR-125a-5p; mmu-miR-760-5p; mmu-miR-101b
Fgf5	1.478	38	25.7104	mmu-miR-32; mmu-let-7g; mmu-miR-297c; mmu-miR-145; mmu-miR-136; mmu-miR-374; mmu-miR-669d; mmu-miR-363-3p; mmu-miR-340-5p; mmu-miR-23b; mmu-miR-18b; mmu-miR-466b-3p; mmu-miR-376c; mmu-miR-291a-5p; mmu-let-7c; mmu-miR-101b; mmu-miR-466c-3p; mmu-miR-205; mmu-miR-367; mmu-miR-291b-5p; mmu-let-7a; mmu-miR-25; mmu-miR-376b; mmu-miR-103; mmu-let-7e; mmu-miR-202-3p; mmu-miR-142-5p; mmu-miR-297a; mmu-miR…
Fgf8	0.192	4	20.8333	mmu-miR-669o-5p; mmu-miR-22; mmu-miR-762; mmu-miR-423-5p
Fhl2	0.44	26	59.0909	mmu-miR-669a-3p; mmu-miR-302d; mmu-miR-467e; mmu-miR-130a; mmu-miR-374; mmu-miR-467c; mmu-miR-130b; mmu-miR-295; mmu-miR-23b; mmu-miR-291b-3p; mmu-miR-205; mmu-miR-290-3p; mmu-miR-134; mmu-miR-669o-3p; mmu-miR-467a; mmu-miR-1198-5p; mmu-miR-301a; mmu-miR-467h; mmu-miR-291a-3p; mmu-miR-292-3p; mmu-miR-23a; mmu-miR-302a; mmu-miR-294
Fjx1	0.87	12	13.7931	mmu-miR-34c; mmu-miR-21; mmu-miR-495; mmu-miR-335-3p; mmu-miR-543; mmu-miR-34a; mmu-miR-669d; mmu-miR-150; mmu-miR-1952; mmu-miR-340-5p; mmu-miR-762
Fkbp1b	0.492	4	8.13008	mmu-miR-760-3p; mmu-miR-329; mmu-miR-381; mmu-miR-18b
Fkbp5	1.952	23	11.7828	mmu-let-7g; mmu-miR-495; mmu-miR-145; mmu-miR-713; mmu-miR-467c; mmu-miR-150; mmu-miR-18b; mmu-miR-762; mmu-let-7c; mmu-miR-377; mmu-miR-291b-3p; mmu-miR-155; mmu-miR-205; mmu-let-7a; mmu-miR-134; mmu-miR-193b; mmu-let-7e; mmu-miR-329; mmu-miR-1952; mmu-miR-33; mmu-miR-292-5p
Fkbp7	0.209	7	33.4928	mmu-miR-291b-3p; mmu-miR-20b; mmu-miR-106a; mmu-miR-17; mmu-miR-20a; mmu-miR-93; mmu-miR-106b
Flnb	1.096	26	23.7226	mmu-miR-195; mmu-miR-433; mmu-miR-29b; mmu-miR-145; mmu-miR-124; mmu-miR-713; mmu-miR-96; mmu-miR-16; mmu-miR-431; mmu-miR-23b; mmu-miR-296-5p; mmu-miR-330; mmu-miR-181a; mmu-miR-29c; mmu-miR-29a; mmu-miR-760-3p; mmu-miR-15a; mmu-miR-532-5p; mmu-miR-182; mmu-miR-1224; mmu-miR-1952; mmu-miR-1935; mmu-miR-15b; mmu-miR-23a
Flrt2	4.343	96	22.1045	mmu-miR-495; mmu-miR-93; mmu-miR-713; mmu-miR-335-5p; mmu-miR-466g; mmu-miR-19a; mmu-miR-20a; mmu-miR-340-5p; mmu-miR-323-3p; mmu-miR-434-3p; mmu-miR-155; mmu-miR-669f-3p; mmu-miR-468; mmu-miR-106a; mmu-miR-129-2-3p; mmu-miR-17; mmu-miR-202-3p; mmu-miR-381; mmu-miR-129-1-3p; mmu-miR-669a-3p; mmu-miR-433; mmu-miR-148b; mmu-miR-669l; mmu-miR-136; mmu-miR-760-5p; mmu-miR-148a; mmu-miR-669f-5p; mmu-m…
Flt1	3.971	93	23.4198	mmu-miR-495; mmu-miR-93; mmu-miR-804; mmu-miR-713; mmu-miR-335-5p; mmu-miR-467c; mmu-miR-20a; mmu-miR-340-5p; mmu-miR-30d; mmu-miR-296-5p; mmu-miR-30a; mmu-miR-434-3p; mmu-miR-290-3p; mmu-miR-155; mmu-miR-106a; mmu-miR-17; mmu-miR-129-2-3p; mmu-miR-292-3p; mmu-miR-129-1-3p; mmu-miR-302a; mmu-miR-302d; mmu-miR-195; mmu-miR-433; mmu-miR-148b; mmu-miR-669l; mmu-miR-136; mmu-miR-148a; mmu-miR-669f-5p…
Flywch2	0.279	7	25.0896	mmu-miR-376b; mmu-miR-182; mmu-miR-26b; mmu-miR-125b-5p; mmu-miR-26a; mmu-miR-125a-5p; mmu-miR-760-5p
Fn1	0.692	4	5.78035	mmu-miR-181a; mmu-miR-103; mmu-miR-297c; mmu-miR-297a
Fndc4	1.196	30	25.0836	mmu-miR-32; mmu-miR-145; mmu-miR-713; mmu-miR-96; mmu-miR-760-5p; mmu-miR-363-3p; mmu-miR-150; mmu-miR-296-5p; mmu-miR-291a-5p; mmu-miR-28; mmu-miR-330; mmu-miR-205; mmu-miR-335-3p; mmu-miR-367; mmu-miR-291b-5p; mmu-miR-22; mmu-miR-378; mmu-miR-27a; mmu-miR-1198-5p; mmu-miR-25; mmu-miR-1983; mmu-miR-1952; mmu-miR-33; mmu-miR-423-5p; mmu-miR-410
Fndc5	2.053	29	14.1257	mmu-let-7g; mmu-miR-148b; mmu-miR-145; mmu-miR-124; mmu-miR-804; mmu-miR-335-5p; mmu-miR-96; mmu-miR-148a; mmu-miR-19a; mmu-miR-18b; mmu-miR-30d; mmu-let-7c; mmu-miR-377; mmu-miR-30a; mmu-miR-330; mmu-miR-152; mmu-miR-335-3p; mmu-let-7a; mmu-miR-27a; mmu-miR-30b; mmu-let-7e; mmu-miR-129-2-3p; mmu-miR-202-3p; mmu-miR-129-1-3p; mmu-miR-1935; mmu-miR-19b
Fosl1	0.637	18	28.2575	mmu-miR-195; mmu-miR-29b; mmu-miR-804; mmu-miR-16; mmu-miR-19a; mmu-miR-762; mmu-miR-291a-5p; mmu-miR-330; mmu-miR-29a; mmu-miR-29c; mmu-miR-291b-5p; mmu-miR-760-3p; mmu-miR-22; mmu-miR-15a; mmu-miR-1198-5p; mmu-miR-1935; mmu-miR-15b; mmu-miR-19b
Fosl2	4.642	88	18.9573	mmu-miR-495; mmu-miR-467e; mmu-miR-145; mmu-miR-804; mmu-miR-713; mmu-miR-96; mmu-miR-130a; mmu-miR-466g; mmu-miR-431; mmu-miR-19a; mmu-miR-130b; mmu-miR-150; mmu-miR-674; mmu-miR-467f; mmu-miR-340-5p; mmu-miR-30d; mmu-miR-296-5p; mmu-miR-30a; mmu-miR-155; mmu-miR-669f-3p; mmu-miR-367; mmu-miR-27a; mmu-miR-30b; mmu-miR-467h; mmu-miR-468; mmu-miR-1983; mmu-miR-182; mmu-miR-26b; mmu-miR-381; mmu-mi…
Foxa2	0.637	15	23.5479	mmu-miR-466a-3p; mmu-miR-495; mmu-miR-93; mmu-miR-804; mmu-miR-378; mmu-miR-106b; mmu-miR-106a; mmu-miR-1983; mmu-miR-20b; mmu-miR-17; mmu-miR-1224; mmu-miR-20a; mmu-miR-340-5p
Foxa3	0.854	21	24.5902	mmu-miR-302d; mmu-miR-467e; mmu-miR-124; mmu-miR-429; mmu-miR-96; mmu-miR-200b; mmu-miR-295; mmu-miR-762; mmu-miR-760-3p; mmu-miR-22; mmu-miR-1198-5p; mmu-miR-467h; mmu-miR-182; mmu-miR-291a-3p; mmu-miR-200c; mmu-miR-672; mmu-miR-1935; mmu-miR-302a; mmu-miR-294; mmu-miR-423-5p
Foxc1	1.774	38	21.4205	mmu-miR-200a; mmu-miR-495; mmu-miR-467e; mmu-miR-804; mmu-miR-96; mmu-miR-200b; mmu-miR-369-3p; mmu-miR-466b-3p; mmu-miR-28; mmu-miR-669f-3p; mmu-miR-467h; mmu-miR-182; mmu-miR-103; mmu-miR-1952; mmu-miR-423-5p; mmu-miR-466a-3p; mmu-miR-124; mmu-miR-297c; mmu-miR-429; mmu-miR-136; mmu-miR-374; mmu-miR-741; mmu-miR-141; mmu-miR-1196; mmu-miR-466c-3p; mmu-miR-330; mmu-miR-335-3p; mmu-miR-760-3p; mm…
Foxd3	0.588	13	22.1088	mmu-miR-466a-3p; mmu-miR-1196; mmu-miR-181a; mmu-miR-126-3p; mmu-miR-374; mmu-miR-150; mmu-miR-369-3p; mmu-miR-467f; mmu-miR-381; mmu-miR-423-5p; mmu-miR-410; mmu-miR-101b
Foxf2	0.758	27	35.6201	mmu-miR-466a-3p; mmu-miR-302d; mmu-miR-350; mmu-miR-804; mmu-miR-429; mmu-miR-96; mmu-miR-130a; mmu-miR-200b; mmu-miR-467c; mmu-miR-19a; mmu-miR-130b; mmu-miR-295; mmu-miR-467f; mmu-miR-291b-3p; mmu-miR-290-3p; mmu-miR-467a; mmu-miR-301a; mmu-miR-182; mmu-miR-291a-3p; mmu-miR-200c; mmu-miR-381; mmu-miR-292-3p; mmu-miR-302a; mmu-miR-19b; mmu-miR-294
Foxg1	0.93	35	37.6344	mmu-miR-32; mmu-miR-495; mmu-miR-429; mmu-miR-872; mmu-miR-374; mmu-miR-200b; mmu-miR-363-3p; mmu-miR-150; mmu-miR-369-3p; mmu-miR-467f; mmu-miR-466b-3p; mmu-miR-30d; mmu-miR-30a; mmu-miR-466c-3p; mmu-miR-291b-3p; mmu-miR-34c; mmu-miR-669f-3p; mmu-miR-543; mmu-miR-367; mmu-miR-34a; mmu-miR-378; mmu-miR-30b; mmu-miR-25; mmu-miR-376b; mmu-miR-200c
Foxj1	1.006	15	14.9105	mmu-miR-141; mmu-miR-1196; mmu-miR-330; mmu-miR-200a; mmu-miR-495; mmu-miR-335-3p; mmu-miR-1960; mmu-miR-760-5p; mmu-miR-182; mmu-miR-1983; mmu-miR-150; mmu-miR-329; mmu-miR-1952; mmu-miR-1935
Foxq1	0.857	21	24.5041	mmu-miR-124; mmu-miR-93; mmu-miR-96; mmu-miR-125a-5p; mmu-miR-20b; mmu-miR-20a; mmu-miR-467f; mmu-miR-125b-5p; mmu-miR-291b-3p; mmu-miR-155; mmu-miR-669f-3p; mmu-miR-378; mmu-miR-106b; mmu-miR-532-5p; mmu-miR-182; mmu-miR-106a; mmu-miR-17; mmu-miR-1952; mmu-miR-381; mmu-miR-292-5p
Foxred1	1.897	17	8.96152	mmu-miR-142-3p; mmu-miR-124; mmu-miR-335-5p; mmu-miR-96; mmu-miR-762; mmu-miR-296-5p; mmu-miR-330; mmu-miR-669o-5p; mmu-miR-543; mmu-miR-378; mmu-miR-183; mmu-miR-193b; mmu-miR-182; mmu-miR-468; mmu-miR-202-3p; mmu-miR-1935
Frat2	1.238	19	15.3473	mmu-miR-29b; mmu-miR-669l; mmu-miR-431; mmu-miR-669d; mmu-miR-669f-5p; mmu-miR-741; mmu-miR-28; mmu-miR-29a; mmu-miR-29c; mmu-miR-134; mmu-miR-669a-5p; mmu-miR-382; mmu-miR-423-3p; mmu-miR-129-2-3p; mmu-miR-1935; mmu-miR-129-1-3p; mmu-miR-423-5p; mmu-miR-466f
Frem2	2.594	53	20.4318	mmu-miR-29b; mmu-miR-804; mmu-miR-713; mmu-miR-335-5p; mmu-miR-150; mmu-miR-674; mmu-miR-291a-5p; mmu-miR-434-3p; mmu-miR-181a; mmu-miR-21; mmu-miR-29c; mmu-miR-543; mmu-miR-291b-5p; mmu-miR-129-2-3p; mmu-miR-672; mmu-miR-129-1-3p; mmu-miR-195; mmu-miR-297c; mmu-miR-136; mmu-miR-16; mmu-miR-760-5p; mmu-miR-484; mmu-miR-18b; mmu-miR-23b; mmu-miR-376c; mmu-miR-101b; mmu-miR-330; mmu-miR-29a; mmu-mi…
Frmd5	2.42	31	12.8099	mmu-miR-195; mmu-miR-495; mmu-miR-1960; mmu-miR-335-5p; mmu-miR-872; mmu-miR-16; mmu-miR-760-5p; mmu-miR-431; mmu-miR-669d; mmu-miR-467f; mmu-miR-340-5p; mmu-miR-466b-3p; mmu-miR-741; mmu-miR-101b; mmu-miR-466c-3p; mmu-miR-181a; mmu-miR-205; mmu-miR-335-3p; mmu-miR-132; mmu-miR-15a; mmu-miR-103; mmu-miR-376b; mmu-miR-1935; mmu-miR-15b; mmu-miR-466f; mmu-miR-423-5p
Fst	1.161	36	31.0078	mmu-miR-495; mmu-miR-467e; mmu-miR-200b; mmu-miR-466g; mmu-miR-19a; mmu-miR-150; mmu-miR-369-3p; mmu-miR-467f; mmu-miR-466b-3p; mmu-miR-30d; mmu-miR-291a-5p; mmu-miR-323-3p; mmu-miR-30a; mmu-miR-291b-5p; mmu-miR-30b; mmu-miR-467h; mmu-miR-26b; mmu-miR-1952; mmu-miR-19b; mmu-miR-466a-3p; mmu-miR-124; mmu-miR-429; mmu-miR-374; mmu-miR-376c; mmu-miR-101b; mmu-miR-741; mmu-miR-466c-3p; mmu-miR-335-3p…
Fstl1	2.588	60	23.1839	mmu-miR-495; mmu-miR-467e; mmu-miR-29b; mmu-miR-145; mmu-miR-466g; mmu-miR-431; mmu-miR-150; mmu-miR-669o-5p; mmu-miR-29c; mmu-miR-205; mmu-miR-543; mmu-miR-367; mmu-miR-132; mmu-miR-467h; mmu-miR-1983; mmu-miR-421; mmu-miR-381; mmu-miR-423-5p; mmu-miR-195; mmu-miR-32; mmu-miR-433; mmu-miR-124; mmu-miR-1960; mmu-miR-297c; mmu-miR-136; mmu-miR-16; mmu-miR-669d; mmu-miR-363-3p; mmu-miR-762; mmu-miR…
Fxyd6	1.197	11	9.18964	mmu-miR-495; mmu-miR-804; mmu-miR-27a; mmu-miR-760-5p; mmu-miR-423-3p; mmu-miR-103; mmu-miR-484; mmu-miR-154; mmu-miR-1952; mmu-miR-1935; mmu-miR-28
Fzd1	1.813	52	28.6817	mmu-miR-495; mmu-miR-467c; mmu-miR-340-5p; mmu-miR-466b-3p; mmu-miR-296-5p; mmu-miR-205; mmu-miR-290-3p; mmu-miR-132; mmu-miR-34a; mmu-miR-467a; mmu-miR-1198-5p; mmu-miR-129-2-3p; mmu-miR-672; mmu-miR-292-3p; mmu-miR-154; mmu-miR-129-1-3p; mmu-miR-302a; mmu-miR-466a-3p; mmu-miR-195; mmu-miR-302d; mmu-miR-142-3p; mmu-miR-297c; mmu-miR-350; mmu-miR-16; mmu-miR-669d; mmu-miR-295; mmu-miR-18b; mmu-mi…
Fzd10	1.127	23	20.4082	mmu-miR-32; mmu-miR-302d; mmu-miR-495; mmu-miR-125a-5p; mmu-miR-466g; mmu-miR-484; mmu-miR-363-3p; mmu-miR-295; mmu-miR-125b-5p; mmu-miR-762; mmu-miR-28; mmu-miR-181a; mmu-miR-21; mmu-miR-760-3p; mmu-miR-669f-3p; mmu-miR-367; mmu-miR-22; mmu-miR-25; mmu-miR-291a-3p; mmu-miR-1952; mmu-miR-302a; mmu-miR-294
Fzd5	4.285	88	20.5368	mmu-miR-495; mmu-miR-145; mmu-miR-804; mmu-miR-335-5p; mmu-miR-96; mmu-miR-431; mmu-miR-467c; mmu-miR-434-3p; mmu-miR-290-3p; mmu-let-7a; mmu-miR-541; mmu-miR-468; mmu-miR-202-3p; mmu-miR-672; mmu-miR-292-3p; mmu-miR-302a; mmu-miR-302d; mmu-let-7g; mmu-miR-148b; mmu-miR-125a-5p; mmu-miR-760-5p; mmu-miR-148a; mmu-miR-295; mmu-miR-125b-5p; mmu-miR-23b; mmu-miR-1196; mmu-miR-34c; mmu-miR-152; mmu-mi…
Fzd8	1.224	45	36.7647	mmu-miR-200a; mmu-miR-495; mmu-miR-467e; mmu-miR-93; mmu-miR-130a; mmu-miR-467c; mmu-miR-19a; mmu-miR-130b; mmu-miR-20a; mmu-miR-291a-5p; mmu-miR-290-3p; mmu-miR-669f-3p; mmu-miR-291b-5p; mmu-miR-132; mmu-miR-467a; mmu-miR-467h; mmu-miR-106a; mmu-miR-17; mmu-miR-421; mmu-miR-292-3p; mmu-miR-302a; mmu-miR-423-5p; mmu-miR-19b; mmu-miR-466a-3p; mmu-miR-302d; mmu-miR-142-3p; mmu-miR-124; mmu-miR-1960…
Gabpb1	2.788	37	13.2712	mmu-miR-297c; mmu-miR-1960; mmu-miR-148b; mmu-miR-145; mmu-miR-124; mmu-miR-96; mmu-miR-148a; mmu-miR-1198-3p; mmu-miR-484; mmu-miR-340-5p; mmu-miR-151-5p; mmu-miR-34c; mmu-miR-21; mmu-miR-152; mmu-miR-181a; mmu-miR-335-3p; mmu-miR-155; mmu-miR-132; mmu-miR-34a; mmu-miR-382; mmu-miR-532-5p; mmu-miR-423-3p; mmu-miR-193b; mmu-miR-182; mmu-miR-1983; mmu-miR-1224; mmu-miR-142-5p; mmu-miR-297a; mmu-mi…
Gadd45b	0.558	5	8.96057	mmu-miR-541; mmu-miR-760-3p; mmu-miR-22; mmu-miR-431; mmu-miR-423-5p
Gadd45g	0.489	9	18.4049	mmu-miR-195; mmu-miR-152; mmu-miR-148b; mmu-miR-1952; mmu-miR-1935; mmu-miR-15a; mmu-miR-16; mmu-miR-15b; mmu-miR-148a
Galnt10	2.786	61	21.8952	mmu-miR-200a; mmu-miR-467e; mmu-miR-29b; mmu-miR-804; mmu-miR-150; mmu-miR-296-5p; mmu-miR-434-3p; mmu-miR-29c; mmu-miR-205; mmu-miR-367; mmu-miR-467h; mmu-miR-541; mmu-miR-103; mmu-miR-129-2-3p; mmu-miR-26b; mmu-miR-672; mmu-miR-421; mmu-miR-1952; mmu-miR-129-1-3p; mmu-miR-302a; mmu-miR-423-5p; mmu-miR-302d; mmu-miR-32; mmu-miR-433; mmu-miR-350; mmu-miR-124; mmu-miR-148b; mmu-miR-1960; mmu-miR-1…
Gar1	0.284	10	35.2113	mmu-miR-195; mmu-miR-335-3p; mmu-miR-145; mmu-miR-15a; mmu-miR-16; mmu-miR-669d; mmu-miR-103; mmu-miR-1224; mmu-miR-1935; mmu-miR-15b
Gars	0.159	6	37.7358	mmu-miR-142-3p; mmu-miR-205; mmu-miR-674; mmu-miR-340-5p; mmu-miR-22; mmu-miR-1198-5p
Gart	2.28	34	14.9123	mmu-miR-433; mmu-miR-350; mmu-miR-29b; mmu-miR-1960; mmu-miR-148b; mmu-miR-335-5p; mmu-miR-760-5p; mmu-miR-431; mmu-miR-148a; mmu-miR-19a; mmu-miR-762; mmu-miR-296-5p; mmu-miR-741; mmu-miR-34c; mmu-miR-330; mmu-miR-152; mmu-miR-181a; mmu-miR-1945; mmu-miR-335-3p; mmu-miR-29c; mmu-miR-29a; mmu-miR-34a; mmu-miR-22; mmu-miR-27a; mmu-miR-376b; mmu-miR-129-2-3p; mmu-miR-1935; mmu-miR-129-1-3p; mmu-miR…
Gas1	1.382	19	13.7482	mmu-miR-200a; mmu-miR-297c; mmu-miR-335-5p; mmu-miR-466g; mmu-miR-674; mmu-miR-340-5p; mmu-miR-141; mmu-miR-155; mmu-miR-126-3p; mmu-miR-423-3p; mmu-miR-468; mmu-miR-1983; mmu-miR-26b; mmu-miR-329; mmu-miR-1952; mmu-miR-297a; mmu-miR-26a; mmu-miR-410; mmu-miR-423-5p
Gas2l3	4.38	45	10.274	mmu-miR-200a; mmu-miR-145; mmu-miR-804; mmu-miR-200b; mmu-miR-466g; mmu-miR-150; mmu-miR-674; mmu-miR-369-3p; mmu-miR-340-5p; mmu-miR-466b-3p; mmu-miR-291a-5p; mmu-miR-28; mmu-miR-434-3p; mmu-miR-291b-5p; mmu-miR-1198-5p; mmu-miR-541; mmu-miR-468; mmu-miR-26b; mmu-miR-154; mmu-miR-433; mmu-miR-297c; mmu-miR-669l; mmu-miR-429; mmu-miR-374; mmu-miR-760-5p; mmu-miR-669f-5p; mmu-miR-762; mmu-miR-141;…
Gata6	1.153	28	24.2845	mmu-miR-32; mmu-miR-433; mmu-miR-200a; mmu-miR-29b; mmu-miR-1960; mmu-miR-124; mmu-miR-804; mmu-miR-335-5p; mmu-miR-466g; mmu-miR-363-3p; mmu-miR-150; mmu-miR-340-5p; mmu-miR-762; mmu-miR-30d; mmu-miR-741; mmu-miR-30a; mmu-miR-141; mmu-miR-181a; mmu-miR-29a; mmu-miR-29c; mmu-miR-367; mmu-miR-378; mmu-miR-27a; mmu-miR-30b; mmu-miR-25; mmu-miR-672; mmu-miR-1952; mmu-miR-1935
Gatad2a	2.775	63	22.7027	mmu-miR-495; mmu-miR-93; mmu-miR-713; mmu-miR-130a; mmu-miR-130b; mmu-miR-150; mmu-miR-674; mmu-miR-20a; mmu-miR-669o-5p; mmu-miR-21; mmu-miR-290-3p; mmu-miR-467a; mmu-miR-1983; mmu-miR-106a; mmu-miR-103; mmu-miR-129-2-3p; mmu-miR-17; mmu-miR-292-3p; mmu-miR-1952; mmu-miR-129-1-3p; mmu-miR-302a; mmu-miR-302d; mmu-miR-433; mmu-miR-148b; mmu-miR-1960; mmu-miR-669l; mmu-miR-374; mmu-miR-148a; mmu-mi…
Gcat	1.054	42	39.8482	mmu-miR-195; mmu-miR-93; mmu-miR-335-5p; mmu-miR-96; mmu-miR-16; mmu-miR-1198-3p; mmu-miR-484; mmu-miR-20b; mmu-miR-674; mmu-miR-20a; mmu-miR-18b; mmu-miR-762; mmu-miR-34c; mmu-miR-205; mmu-miR-760-3p; mmu-miR-376a; mmu-miR-34a; mmu-miR-15a; mmu-miR-106b; mmu-miR-106a; mmu-miR-182; mmu-miR-129-2-3p; mmu-miR-17; mmu-miR-33; mmu-miR-1952; mmu-miR-129-1-3p; mmu-miR-15b
Gcsh	0.819	12	14.652	mmu-miR-141; mmu-miR-200a; mmu-miR-181a; mmu-miR-1960; mmu-miR-145; mmu-miR-543; mmu-miR-134; mmu-miR-429; mmu-miR-200b; mmu-miR-183; mmu-miR-674; mmu-miR-200c
Gen1	0.329	1	3.03951	mmu-miR-1198-5p
Gga2	2.969	42	14.1462	mmu-miR-495; mmu-miR-713; mmu-miR-96; mmu-miR-130a; mmu-miR-200b; mmu-miR-431; mmu-miR-130b; mmu-miR-467f; mmu-miR-296-5p; mmu-miR-28; mmu-miR-205; mmu-miR-669f-3p; mmu-miR-27a; mmu-miR-1198-5p; mmu-miR-182; mmu-miR-421; mmu-miR-154; mmu-miR-142-3p; mmu-miR-297c; mmu-miR-350; mmu-miR-669l; mmu-miR-429; mmu-miR-125a-5p; mmu-miR-669f-5p; mmu-miR-125b-5p; mmu-miR-762; mmu-miR-741; mmu-miR-335-3p; mm…
Ggct	3.278	44	13.4228	mmu-miR-200a; mmu-miR-495; mmu-miR-93; mmu-miR-335-5p; mmu-miR-19a; mmu-miR-674; mmu-miR-20a; mmu-miR-296-5p; mmu-miR-669o-5p; mmu-miR-543; mmu-miR-1198-5p; mmu-miR-106a; mmu-miR-17; mmu-miR-421; mmu-miR-1952; mmu-miR-302a; mmu-miR-423-5p; mmu-miR-19b; mmu-miR-195; mmu-miR-302d; mmu-miR-433; mmu-miR-1960; mmu-miR-16; mmu-miR-374; mmu-miR-20b; mmu-miR-295; mmu-miR-376c; mmu-miR-141; mmu-miR-291b-3…
Ghr	1.982	50	25.227	mmu-miR-29b; mmu-miR-93; mmu-miR-369-3p; mmu-miR-20a; mmu-miR-340-5p; mmu-miR-30d; mmu-miR-30a; mmu-miR-669o-5p; mmu-miR-29c; mmu-miR-34a; mmu-miR-27a; mmu-miR-30b; mmu-miR-106a; mmu-miR-129-2-3p; mmu-miR-17; mmu-miR-381; mmu-miR-1952; mmu-miR-129-1-3p; mmu-miR-302a; mmu-miR-195; mmu-miR-302d; mmu-miR-350; mmu-miR-148b; mmu-miR-297c; mmu-miR-669l; mmu-miR-374; mmu-miR-16; mmu-miR-148a; mmu-miR-66…
Gins1	0.371	9	24.2588	mmu-miR-21; mmu-miR-495; mmu-miR-155; mmu-miR-804; mmu-miR-431; mmu-miR-1224; mmu-miR-23b; mmu-miR-23a; mmu-miR-410
Gipc2	0.308	8	25.974	mmu-miR-20b; mmu-miR-142-3p; mmu-miR-106a; mmu-miR-17; mmu-miR-20a; mmu-miR-93; mmu-miR-376c; mmu-miR-106b
Gja1	1.724	42	24.3619	mmu-miR-200a; mmu-miR-495; mmu-miR-804; mmu-miR-713; mmu-miR-130a; mmu-miR-19a; mmu-miR-130b; mmu-miR-674; mmu-miR-466b-3p; mmu-miR-30d; mmu-miR-323-3p; mmu-miR-30a; mmu-miR-434-3p; mmu-miR-181a; mmu-miR-21; mmu-miR-205; mmu-miR-30b; mmu-miR-672; mmu-miR-381; mmu-miR-19b; mmu-miR-125a-5p; mmu-miR-669d; mmu-miR-125b-5p; mmu-miR-23b; mmu-miR-376c; mmu-miR-101b; mmu-miR-141; mmu-miR-466c-3p; mmu-miR…
Gjb2	1.469	37	25.1872	mmu-miR-200b; mmu-miR-19a; mmu-miR-150; mmu-miR-674; mmu-miR-467f; mmu-miR-30d; mmu-miR-30a; mmu-miR-434-3p; mmu-miR-669o-5p; mmu-miR-181a; mmu-miR-543; mmu-miR-27a; mmu-miR-30b; mmu-miR-1198-5p; mmu-miR-26b; mmu-miR-302a; mmu-miR-19b; mmu-miR-302d; mmu-miR-466a-3p; mmu-miR-429; mmu-miR-295; mmu-miR-18b; mmu-miR-23b; mmu-miR-532-5p; mmu-miR-291a-3p; mmu-miR-200c; mmu-miR-1224; mmu-miR-33; mmu-miR…
Gjb3	0.69	21	30.4348	mmu-miR-669a-3p; mmu-miR-302d; mmu-miR-669l; mmu-miR-96; mmu-miR-136; mmu-miR-1198-3p; mmu-miR-669f-5p; mmu-miR-295; mmu-miR-467f; mmu-miR-669o-5p; mmu-miR-760-3p; mmu-miR-669o-3p; mmu-miR-669a-5p; mmu-miR-382; mmu-miR-182; mmu-miR-291a-3p; mmu-miR-329; mmu-miR-142-5p; mmu-miR-381; mmu-miR-302a; mmu-miR-294
Gldc	0.518	9	17.3745	mmu-miR-34c; mmu-miR-467e; mmu-miR-543; mmu-miR-34a; mmu-miR-374; mmu-miR-467h; mmu-miR-103; mmu-miR-467f; mmu-miR-377
Gli2	1.653	33	19.9637	mmu-let-7g; mmu-miR-148b; mmu-miR-96; mmu-miR-136; mmu-miR-125a-5p; mmu-miR-431; mmu-miR-148a; mmu-miR-669d; mmu-miR-23b; mmu-miR-125b-5p; mmu-miR-376c; mmu-let-7c; mmu-miR-741; mmu-miR-323-3p; mmu-miR-28; mmu-miR-330; mmu-miR-152; mmu-miR-335-3p; mmu-miR-760-3p; mmu-let-7a; mmu-miR-378; mmu-miR-532-5p; mmu-miR-541; mmu-let-7e; mmu-miR-182; mmu-miR-1224; mmu-miR-202-3p; mmu-miR-154; mmu-miR-1952;…
Glipr2	1.495	32	21.4047	mmu-miR-200a; mmu-miR-495; mmu-miR-148b; mmu-miR-335-5p; mmu-miR-96; mmu-miR-136; mmu-miR-148a; mmu-miR-1198-3p; mmu-miR-30d; mmu-miR-741; mmu-miR-377; mmu-miR-30a; mmu-miR-434-3p; mmu-miR-141; mmu-miR-34c; mmu-miR-152; mmu-miR-335-3p; mmu-miR-205; mmu-miR-34a; mmu-miR-22; mmu-miR-378; mmu-miR-27a; mmu-miR-30b; mmu-miR-468; mmu-miR-182; mmu-miR-129-2-3p; mmu-miR-329; mmu-miR-129-1-3p; mmu-miR-1935
Gls2	1.987	41	20.6341	mmu-miR-200a; mmu-miR-713; mmu-miR-96; mmu-miR-434-3p; mmu-miR-669o-5p; mmu-let-7a; mmu-miR-103; mmu-miR-182; mmu-miR-202-3p; mmu-miR-1952; mmu-miR-423-5p; mmu-let-7g; mmu-miR-195; mmu-miR-466a-3p; mmu-miR-148b; mmu-miR-1960; mmu-miR-16; mmu-miR-1198-3p; mmu-miR-148a; mmu-miR-18b; mmu-let-7c; mmu-miR-377; mmu-miR-141; mmu-miR-152; mmu-miR-760-3p; mmu-miR-22; mmu-miR-293; mmu-miR-15a; mmu-miR-193b…
Gltp	1.004	9	8.96414	mmu-miR-297c; mmu-miR-145; mmu-miR-760-3p; mmu-miR-134; mmu-miR-431; mmu-miR-33; mmu-miR-297a; mmu-miR-377
Glul	1.541	22	14.2764	mmu-miR-466a-3p; mmu-miR-495; mmu-miR-804; mmu-miR-96; mmu-miR-340-5p; mmu-miR-291a-5p; mmu-miR-377; mmu-miR-34c; mmu-miR-205; mmu-miR-335-3p; mmu-miR-132; mmu-miR-291b-5p; mmu-miR-34a; mmu-miR-27a; mmu-miR-532-5p; mmu-miR-26b; mmu-miR-672; mmu-miR-26a; mmu-miR-1935; mmu-miR-292-5p; mmu-miR-466f
Gm2a	3.496	48	13.73	mmu-miR-96; mmu-miR-130a; mmu-miR-19a; mmu-miR-130b; mmu-miR-150; mmu-miR-674; mmu-miR-296-5p; mmu-miR-290-3p; mmu-miR-205; mmu-miR-155; mmu-miR-669f-3p; mmu-miR-132; mmu-miR-467a; mmu-miR-27a; mmu-miR-541; mmu-miR-1983; mmu-miR-129-2-3p; mmu-miR-26b; mmu-miR-292-3p; mmu-miR-129-1-3p; mmu-miR-19b; mmu-miR-142-3p; mmu-miR-124; mmu-miR-148b; mmu-miR-350; mmu-miR-136; mmu-miR-760-5p; mmu-miR-148a; m…
Gmnn	0.224	6	26.7857	mmu-miR-302d; mmu-miR-335-3p; mmu-miR-291a-3p; mmu-miR-295; mmu-miR-302a; mmu-miR-294
Gmps	5.845	157	26.8606	mmu-miR-495; mmu-miR-145; mmu-miR-93; mmu-miR-713; mmu-miR-466g; mmu-miR-467c; mmu-miR-20a; mmu-miR-466b-3p; mmu-miR-30d; mmu-miR-296-5p; mmu-miR-30a; mmu-miR-434-3p; mmu-miR-290-3p; mmu-miR-669f-3p; mmu-miR-367; mmu-let-7a; mmu-miR-541; mmu-miR-106a; mmu-miR-17; mmu-miR-202-3p; mmu-miR-672; mmu-miR-292-3p; mmu-miR-302a; mmu-miR-466a-3p; mmu-miR-302d; mmu-let-7g; mmu-miR-195; mmu-miR-124; mmu-miR…
Gna14	1.288	24	18.6335	mmu-miR-32; mmu-miR-495; mmu-miR-124; mmu-miR-669l; mmu-miR-96; mmu-miR-19a; mmu-miR-669f-5p; mmu-miR-363-3p; mmu-miR-23b; mmu-miR-291a-5p; mmu-miR-434-3p; mmu-miR-155; mmu-miR-335-3p; mmu-miR-291b-5p; mmu-miR-367; mmu-miR-669a-5p; mmu-miR-382; mmu-miR-25; mmu-miR-182; mmu-miR-329; mmu-miR-421; mmu-miR-23a; mmu-miR-19b
Gng11	0.285	5	17.5439	mmu-miR-205; mmu-miR-421; mmu-miR-741; mmu-miR-532-5p; mmu-miR-377
Gng12	3.761	78	20.7392	mmu-miR-495; mmu-miR-29b; mmu-miR-145; mmu-miR-93; mmu-miR-713; mmu-miR-335-5p; mmu-miR-96; mmu-miR-130a; mmu-miR-466g; mmu-miR-19a; mmu-miR-130b; mmu-miR-20a; mmu-miR-467f; mmu-miR-340-5p; mmu-miR-30d; mmu-miR-291a-5p; mmu-miR-30a; mmu-miR-21; mmu-miR-29c; mmu-miR-205; mmu-miR-291b-5p; mmu-miR-34a; mmu-miR-27a; mmu-miR-30b; mmu-miR-1198-5p; mmu-miR-468; mmu-miR-106a; mmu-miR-182; mmu-miR-17; mmu…
Gnmt	0.136	8	58.8235	mmu-miR-32; mmu-miR-25; mmu-miR-363-3p; mmu-miR-367; mmu-miR-33; mmu-miR-30d; mmu-miR-30b; mmu-miR-30a
Golim4	2.947	52	17.6451	mmu-miR-200a; mmu-miR-145; mmu-miR-431; mmu-miR-674; mmu-miR-369-3p; mmu-miR-467f; mmu-miR-340-5p; mmu-miR-466b-3p; mmu-miR-28; mmu-miR-21; mmu-miR-205; mmu-miR-367; mmu-miR-27a; mmu-miR-182; mmu-miR-1952; mmu-miR-302a; mmu-miR-466a-3p; mmu-miR-302d; mmu-miR-32; mmu-miR-297c; mmu-miR-350; mmu-miR-669l; mmu-miR-125a-5p; mmu-miR-1198-3p; mmu-miR-669f-5p; mmu-miR-363-3p; mmu-miR-295; mmu-miR-125b-5p…
Golph3	1.473	32	21.7244	mmu-miR-466a-3p; mmu-let-7g; mmu-miR-804; mmu-miR-335-5p; mmu-miR-374; mmu-miR-369-3p; mmu-miR-23b; mmu-miR-762; mmu-miR-466b-3p; mmu-let-7c; mmu-miR-377; mmu-miR-323-3p; mmu-miR-101b; mmu-miR-466c-3p; mmu-miR-205; mmu-miR-669f-3p; mmu-let-7a; mmu-miR-134; mmu-miR-126-3p; mmu-miR-27a; mmu-let-7e; mmu-miR-1224; mmu-miR-202-3p; mmu-miR-672; mmu-miR-1935; mmu-miR-23a; mmu-miR-423-5p; mmu-miR-410
Gosr1	3.507	67	19.1046	mmu-miR-200a; mmu-miR-495; mmu-miR-467e; mmu-miR-29b; mmu-miR-145; mmu-miR-713; mmu-miR-200b; mmu-miR-431; mmu-miR-150; mmu-miR-674; mmu-miR-296-5p; mmu-miR-323-3p; mmu-miR-434-3p; mmu-miR-181a; mmu-miR-29c; mmu-miR-205; mmu-miR-669f-3p; mmu-let-7a; mmu-miR-132; mmu-miR-34a; mmu-miR-27a; mmu-miR-1198-5p; mmu-miR-467h; mmu-miR-103; mmu-miR-26b; mmu-miR-202-3p; mmu-miR-423-5p; mmu-let-7g; mmu-miR-3…
Gpa33	1.231	22	17.8716	mmu-miR-302d; mmu-miR-804; mmu-miR-125a-5p; mmu-miR-760-5p; mmu-miR-484; mmu-miR-295; mmu-miR-125b-5p; mmu-miR-762; mmu-miR-296-5p; mmu-miR-205; mmu-miR-1198-5p; mmu-miR-541; mmu-miR-291a-3p; mmu-miR-1952; mmu-miR-421; mmu-miR-1935; mmu-miR-302a; mmu-miR-294; mmu-miR-410
Gpc4	0.5	4	8	mmu-miR-669o-5p; mmu-miR-124; mmu-miR-33; mmu-miR-423-5p
Gpd1l	3.065	34	11.093	mmu-miR-195; mmu-miR-495; mmu-miR-804; mmu-miR-16; mmu-miR-125a-5p; mmu-miR-466g; mmu-miR-484; mmu-miR-340-5p; mmu-miR-23b; mmu-miR-125b-5p; mmu-miR-377; mmu-miR-34c; mmu-miR-330; mmu-miR-181a; mmu-miR-335-3p; mmu-miR-669f-3p; mmu-miR-134; mmu-miR-34a; mmu-miR-22; mmu-miR-15a; mmu-miR-1198-5p; mmu-miR-376b; mmu-miR-103; mmu-miR-1983; mmu-miR-381; mmu-miR-142-5p; mmu-miR-1952; mmu-miR-1935; mmu-mi…
Gpr124	1.401	44	31.4061	mmu-miR-32; mmu-miR-195; mmu-miR-1960; mmu-miR-124; mmu-miR-96; mmu-miR-374; mmu-miR-16; mmu-miR-760-5p; mmu-miR-363-3p; mmu-miR-762; mmu-miR-466b-3p; mmu-miR-30d; mmu-miR-30a; mmu-miR-466c-3p; mmu-miR-34c; mmu-miR-543; mmu-miR-367; mmu-miR-34a; mmu-miR-22; mmu-miR-378; mmu-miR-15a; mmu-miR-1198-5p; mmu-miR-30b; mmu-miR-532-5p; mmu-miR-541; mmu-miR-25; mmu-miR-182; mmu-miR-103; mmu-miR-1983; mmu-…
Gpr126	2.886	54	18.711	mmu-miR-145; mmu-miR-335-5p; mmu-miR-96; mmu-miR-340-5p; mmu-miR-323-3p; mmu-miR-205; mmu-miR-34a; mmu-miR-1198-5p; mmu-miR-1983; mmu-miR-103; mmu-miR-182; mmu-miR-26b; mmu-miR-421; mmu-miR-381; mmu-miR-154; mmu-miR-466a-3p; mmu-miR-195; mmu-miR-433; mmu-miR-142-3p; mmu-miR-350; mmu-miR-148b; mmu-miR-1960; mmu-miR-136; mmu-miR-872; mmu-miR-16; mmu-miR-148a; mmu-miR-484; mmu-miR-18b; mmu-miR-762; …
Gpr176	2.119	47	22.1803	mmu-miR-495; mmu-miR-29b; mmu-miR-713; mmu-miR-431; mmu-miR-30d; mmu-miR-296-5p; mmu-miR-30a; mmu-miR-181a; mmu-miR-29c; mmu-miR-155; mmu-miR-543; mmu-miR-34a; mmu-miR-30b; mmu-miR-468; mmu-miR-182; mmu-miR-129-2-3p; mmu-miR-129-1-3p; mmu-miR-195; mmu-miR-297c; mmu-miR-669l; mmu-miR-16; mmu-miR-669d; mmu-miR-669f-5p; mmu-miR-18b; mmu-miR-23b; mmu-miR-330; mmu-miR-34c; mmu-miR-29a; mmu-miR-760-3p;…
Gpr56	1.221	26	21.294	mmu-miR-195; mmu-miR-16; mmu-miR-125a-5p; mmu-miR-431; mmu-miR-150; mmu-miR-340-5p; mmu-miR-18b; mmu-miR-125b-5p; mmu-miR-291a-5p; mmu-miR-741; mmu-miR-377; mmu-miR-28; mmu-miR-34c; mmu-miR-543; mmu-miR-291b-5p; mmu-miR-34a; mmu-miR-15a; mmu-miR-129-2-3p; mmu-miR-1224; mmu-miR-142-5p; mmu-miR-129-1-3p; mmu-miR-15b
Gprc5c	2.264	52	22.9682	mmu-miR-29b; mmu-miR-96; mmu-miR-19a; mmu-miR-150; mmu-miR-28; mmu-miR-181a; mmu-miR-29c; mmu-let-7a; mmu-miR-34a; mmu-miR-27a; mmu-miR-1198-5p; mmu-miR-541; mmu-miR-1983; mmu-miR-103; mmu-miR-202-3p; mmu-miR-672; mmu-miR-421; mmu-miR-423-5p; mmu-miR-19b; mmu-let-7g; mmu-miR-195; mmu-miR-124; mmu-miR-350; mmu-miR-669l; mmu-miR-125a-5p; mmu-miR-16; mmu-miR-760-5p; mmu-miR-1198-3p; mmu-miR-669d; mm…
Gpx8	0.373	5	13.4048	mmu-miR-141; mmu-miR-200a; mmu-miR-669f-3p; mmu-miR-329; mmu-miR-381
Gramd1b	4.757	72	15.1356	mmu-miR-29b; mmu-miR-145; mmu-miR-804; mmu-miR-713; mmu-miR-335-5p; mmu-miR-96; mmu-miR-431; mmu-miR-19a; mmu-miR-150; mmu-miR-674; mmu-miR-466b-3p; mmu-miR-434-3p; mmu-miR-181a; mmu-miR-29c; mmu-miR-543; mmu-miR-132; mmu-miR-34a; mmu-miR-1198-5p; mmu-miR-182; mmu-miR-421; mmu-miR-19b; mmu-miR-195; mmu-miR-124; mmu-miR-1960; mmu-miR-669l; mmu-miR-136; mmu-miR-16; mmu-miR-760-5p; mmu-miR-1198-3p; …
Grb14	0.374	5	13.369	mmu-miR-1983; mmu-miR-421; mmu-miR-27a; mmu-miR-741; mmu-miR-377
Grem1	3.436	37	10.7683	mmu-miR-142-3p; mmu-miR-350; mmu-miR-1960; mmu-miR-148b; mmu-miR-124; mmu-miR-804; mmu-miR-96; mmu-miR-136; mmu-miR-125a-5p; mmu-miR-431; mmu-miR-148a; mmu-miR-1198-3p; mmu-miR-669d; mmu-miR-484; mmu-miR-125b-5p; mmu-miR-291a-5p; mmu-miR-741; mmu-miR-28; mmu-miR-152; mmu-miR-181a; mmu-miR-205; mmu-miR-543; mmu-miR-291b-5p; mmu-miR-132; mmu-miR-382; mmu-miR-1198-5p; mmu-miR-532-5p; mmu-miR-541; mm…
Grem2	2.99	66	22.0736	mmu-miR-200a; mmu-miR-713; mmu-miR-466g; mmu-miR-431; mmu-miR-19a; mmu-miR-340-5p; mmu-miR-21; mmu-miR-205; mmu-miR-543; mmu-miR-367; mmu-let-7a; mmu-miR-27a; mmu-miR-103; mmu-miR-421; mmu-miR-1952; mmu-miR-19b; mmu-let-7g; mmu-miR-195; mmu-miR-32; mmu-miR-433; mmu-miR-350; mmu-miR-124; mmu-miR-148b; mmu-miR-297c; mmu-miR-669l; mmu-miR-374; mmu-miR-125a-5p; mmu-miR-16; mmu-miR-148a; mmu-miR-669d;…
Grhl2	2.718	81	29.8013	mmu-miR-93; mmu-miR-335-5p; mmu-miR-96; mmu-miR-20a; mmu-miR-30d; mmu-miR-296-5p; mmu-miR-30a; mmu-miR-367; mmu-miR-468; mmu-miR-106a; mmu-miR-17; mmu-miR-202-3p; mmu-miR-302a; mmu-miR-302d; mmu-miR-124; mmu-miR-669l; mmu-miR-760-5p; mmu-miR-1198-3p; mmu-miR-669f-5p; mmu-miR-20b; mmu-miR-295; mmu-miR-34c; mmu-miR-330; mmu-miR-134; mmu-miR-329; mmu-miR-1224; mmu-miR-200a; mmu-miR-130a; mmu-miR-130…
Grin2d	0.897	13	14.4928	mmu-miR-205; mmu-miR-760-3p; mmu-miR-134; mmu-miR-1983; mmu-miR-129-2-3p; mmu-miR-329; mmu-miR-26b; mmu-miR-1952; mmu-miR-762; mmu-miR-296-5p; mmu-miR-129-1-3p; mmu-miR-26a
Grrp1	0.24	8	33.3333	mmu-miR-20b; mmu-miR-106a; mmu-miR-17; mmu-miR-20a; mmu-miR-93; mmu-miR-106b; mmu-miR-741; mmu-miR-1198-3p
Grtp1	0.184	2	10.8696	mmu-miR-330; mmu-miR-136
Gsc	0.282	11	39.0071	mmu-miR-93; mmu-miR-106b; mmu-miR-1198-3p; mmu-miR-106a; mmu-miR-20b; mmu-miR-17; mmu-miR-329; mmu-miR-20a; mmu-miR-142-5p; mmu-miR-28; mmu-miR-151-5p
Gsto1	0.34	9	26.4706	mmu-miR-34c; mmu-miR-291b-5p; mmu-miR-429; mmu-miR-34a; mmu-miR-27a; mmu-miR-200b; mmu-miR-200c; mmu-miR-291a-5p; mmu-miR-423-5p
Gsx1	0.793	6	7.5662	mmu-miR-434-3p; mmu-miR-205; mmu-miR-26b; mmu-miR-672; mmu-miR-26a; mmu-miR-466g
Gtf2a1	3.828	85	22.2048	mmu-miR-495; mmu-miR-29b; mmu-miR-93; mmu-miR-96; mmu-miR-466g; mmu-miR-431; mmu-miR-19a; mmu-miR-20a; mmu-miR-340-5p; mmu-miR-181a; mmu-miR-29c; mmu-miR-155; mmu-miR-543; mmu-miR-669o-3p; mmu-miR-1198-5p; mmu-miR-541; mmu-miR-106a; mmu-miR-182; mmu-miR-17; mmu-miR-26b; mmu-miR-423-5p; mmu-miR-19b; mmu-miR-669a-3p; mmu-miR-142-3p; mmu-miR-1960; mmu-miR-297c; mmu-miR-350; mmu-miR-669l; mmu-miR-760…
Gtf2a2	0.429	3	6.99301	mmu-miR-297c; mmu-miR-421; mmu-miR-297a
Gtf2h1	1.295	42	32.4324	mmu-miR-713; mmu-miR-96; mmu-miR-130a; mmu-miR-200b; mmu-miR-130b; mmu-miR-27a; mmu-miR-103; mmu-miR-182; mmu-miR-129-2-3p; mmu-miR-381; mmu-miR-129-1-3p; mmu-miR-195; mmu-miR-148b; mmu-miR-1960; mmu-miR-669l; mmu-miR-429; mmu-miR-16; mmu-miR-148a; mmu-miR-669f-5p; mmu-miR-23b; mmu-miR-741; mmu-miR-152; mmu-miR-335-3p; mmu-miR-134; mmu-miR-669a-5p; mmu-miR-15a; mmu-miR-301a; mmu-miR-183; mmu-miR-…
Gtf3c6	0.33	2	6.06061	mmu-miR-297c; mmu-miR-297a
Guf1	1.383	8	5.78453	mmu-miR-335-3p; mmu-miR-291b-5p; mmu-miR-376a; mmu-miR-183; mmu-miR-381; mmu-miR-1935; mmu-miR-291a-5p; mmu-miR-741
Gulo	0.779	20	25.6739	mmu-miR-669a-3p; mmu-miR-466a-3p; mmu-let-7g; mmu-miR-762; mmu-let-7c; mmu-miR-741; mmu-miR-34c; mmu-miR-760-3p; mmu-let-7a; mmu-miR-22; mmu-miR-34a; mmu-miR-669o-3p; mmu-miR-27a; mmu-miR-1983; mmu-miR-182; mmu-let-7e; mmu-miR-1952; mmu-miR-423-5p
Gusb	1.236	20	16.1812	mmu-miR-93; mmu-miR-130a; mmu-miR-431; mmu-miR-20b; mmu-miR-130b; mmu-miR-150; mmu-miR-20a; mmu-miR-762; mmu-miR-291b-3p; mmu-miR-34c; mmu-miR-335-3p; mmu-miR-34a; mmu-miR-106b; mmu-miR-301a; mmu-miR-106a; mmu-miR-129-2-3p; mmu-miR-17; mmu-miR-1224; mmu-miR-129-1-3p
Gyltl1b	2.11	20	9.47867	mmu-miR-142-3p; mmu-miR-495; mmu-miR-1960; mmu-miR-124; mmu-miR-374; mmu-miR-484; mmu-miR-369-3p; mmu-miR-741; mmu-miR-377; mmu-miR-330; mmu-miR-134; mmu-miR-193b; mmu-miR-103; mmu-miR-376b; mmu-miR-1952; mmu-miR-1935; mmu-miR-410; mmu-miR-466f
Gypc	1.683	40	23.7671	mmu-miR-200a; mmu-miR-467e; mmu-miR-29b; mmu-miR-713; mmu-miR-130a; mmu-miR-19a; mmu-miR-130b; mmu-miR-150; mmu-miR-291a-5p; mmu-miR-28; mmu-miR-669o-5p; mmu-miR-29c; mmu-miR-291b-5p; mmu-miR-467h; mmu-miR-26b; mmu-miR-1952; mmu-miR-19b; mmu-miR-195; mmu-miR-148b; mmu-miR-125a-5p; mmu-miR-16; mmu-miR-760-5p; mmu-miR-148a; mmu-miR-125b-5p; mmu-miR-141; mmu-miR-1196; mmu-miR-152; mmu-miR-330; mmu-m…
H13	3.946	43	10.8971	mmu-miR-195; mmu-miR-1960; mmu-miR-148b; mmu-miR-124; mmu-miR-713; mmu-miR-96; mmu-miR-16; mmu-miR-760-5p; mmu-miR-148a; mmu-miR-19a; mmu-miR-484; mmu-miR-674; mmu-miR-23b; mmu-miR-762; mmu-miR-296-5p; mmu-miR-34c; mmu-miR-330; mmu-miR-152; mmu-miR-181a; mmu-miR-760-3p; mmu-miR-34a; mmu-miR-22; mmu-miR-378; mmu-miR-15a; mmu-miR-183; mmu-miR-329; mmu-miR-1952; mmu-miR-1935; mmu-miR-15b; mmu-miR-23…
H2-D1	0.629	18	28.6169	mmu-miR-195; mmu-miR-495; mmu-miR-148b; mmu-miR-669l; mmu-miR-16; mmu-miR-148a; mmu-miR-669f-5p; mmu-miR-377; mmu-miR-28; mmu-miR-152; mmu-miR-181a; mmu-miR-34c; mmu-miR-205; mmu-miR-760-3p; mmu-miR-34a; mmu-miR-669a-5p; mmu-miR-15a; mmu-miR-15b
H2-K1	0.455	7	15.3846	mmu-miR-141; mmu-miR-200a; mmu-miR-674; mmu-miR-713; mmu-miR-22; mmu-miR-760-5p
H2-Q1	0.913	31	33.954	mmu-miR-350; mmu-miR-1960; mmu-miR-148b; mmu-miR-429; mmu-miR-96; mmu-miR-872; mmu-miR-374; mmu-miR-200b; mmu-miR-148a; mmu-miR-19a; mmu-miR-369-3p; mmu-miR-23b; mmu-miR-323-3p; mmu-miR-669o-5p; mmu-miR-152; mmu-miR-335-3p; mmu-miR-382; mmu-miR-1198-5p; mmu-miR-193b; mmu-miR-541; mmu-miR-182; mmu-miR-200c; mmu-miR-154; mmu-miR-1935; mmu-miR-23a; mmu-miR-410; mmu-miR-19b
H2-Q10	0.995	20	20.1005	mmu-miR-136; mmu-miR-872; mmu-miR-125a-5p; mmu-miR-760-5p; mmu-miR-150; mmu-miR-125b-5p; mmu-miR-23b; mmu-miR-741; mmu-miR-377; mmu-miR-28; mmu-miR-330; mmu-miR-760-3p; mmu-miR-376b; mmu-miR-154; mmu-miR-142-5p; mmu-miR-23a
H2afy	0.608	7	11.5132	mmu-miR-195; mmu-miR-713; mmu-miR-125b-5p; mmu-miR-15a; mmu-miR-16; mmu-miR-15b; mmu-miR-125a-5p
H2afz	0.475	10	21.0526	mmu-miR-141; mmu-miR-468; mmu-miR-21; mmu-miR-200a; mmu-miR-335-3p; mmu-miR-132; mmu-miR-713; mmu-miR-27a
Hadhb	0.592	14	23.6486	mmu-miR-291b-3p; mmu-miR-152; mmu-miR-495; mmu-miR-205; mmu-miR-148b; mmu-miR-93; mmu-miR-106b; mmu-miR-193b; mmu-miR-148a; mmu-miR-20b; mmu-miR-106a; mmu-miR-17; mmu-miR-20a; mmu-miR-381
Haghl	0.221	3	13.5747	mmu-miR-669d; mmu-miR-431; mmu-miR-28
Hap1	1.378	26	18.8679	mmu-miR-297c; mmu-miR-1960; mmu-miR-669l; mmu-miR-93; mmu-miR-804; mmu-miR-96; mmu-miR-760-5p; mmu-miR-1198-3p; mmu-miR-669f-5p; mmu-miR-20b; mmu-miR-20a; mmu-miR-377; mmu-miR-28; mmu-miR-434-3p; mmu-miR-127; mmu-miR-205; mmu-miR-669a-5p; mmu-miR-106b; mmu-miR-182; mmu-miR-106a; mmu-miR-376b; mmu-miR-17; mmu-miR-297a
Has2	2.032	45	22.1457	mmu-miR-495; mmu-miR-29b; mmu-miR-145; mmu-miR-93; mmu-miR-804; mmu-miR-335-5p; mmu-miR-130a; mmu-miR-431; mmu-miR-130b; mmu-miR-369-3p; mmu-miR-20a; mmu-miR-467f; mmu-miR-340-5p; mmu-miR-466b-3p; mmu-miR-181a; mmu-miR-29c; mmu-miR-543; mmu-miR-34a; mmu-miR-106a; mmu-miR-17; mmu-miR-26b; mmu-miR-1952; mmu-miR-466a-3p; mmu-miR-433; mmu-miR-136; mmu-miR-374; mmu-miR-20b; mmu-miR-23b; mmu-miR-741; m…
Hat1	0.287	10	34.8432	mmu-miR-350; mmu-miR-29c; mmu-miR-29b; mmu-miR-29a; mmu-miR-155; mmu-miR-669f-3p; mmu-miR-27a; mmu-miR-381; mmu-miR-376c; mmu-miR-292-5p
Hbp1	1.236	20	16.1812	mmu-miR-669a-3p; mmu-miR-466a-3p; mmu-miR-433; mmu-miR-148b; mmu-miR-136; mmu-miR-125a-5p; mmu-miR-148a; mmu-miR-669d; mmu-miR-467f; mmu-miR-125b-5p; mmu-miR-18b; mmu-miR-30d; mmu-miR-30a; mmu-miR-101b; mmu-miR-152; mmu-miR-330; mmu-miR-669o-3p; mmu-miR-30b; mmu-miR-468; mmu-miR-1935
Hcfc1	1.646	15	9.113	mmu-miR-434-3p; mmu-miR-34c; mmu-miR-155; mmu-miR-543; mmu-miR-134; mmu-miR-34a; mmu-miR-382; mmu-miR-1198-5p; mmu-miR-760-5p; mmu-miR-466g; mmu-miR-193b; mmu-miR-1983; mmu-miR-150; mmu-miR-1224; mmu-miR-101b
Hdlbp	2.233	43	19.2566	mmu-miR-467c; mmu-miR-150; mmu-miR-674; mmu-miR-340-5p; mmu-miR-290-3p; mmu-miR-367; mmu-let-7a; mmu-miR-467a; mmu-miR-27a; mmu-miR-292-3p; mmu-miR-302a; mmu-let-7g; mmu-miR-302d; mmu-miR-32; mmu-miR-433; mmu-miR-1960; mmu-miR-760-5p; mmu-miR-1198-3p; mmu-miR-669d; mmu-miR-363-3p; mmu-miR-484; mmu-miR-295; mmu-miR-762; mmu-let-7c; mmu-miR-377; mmu-miR-291b-3p; mmu-miR-330; mmu-miR-760-3p; mmu-miR…
Helb	1.376	28	20.3488	mmu-miR-669a-3p; mmu-miR-32; mmu-miR-195; mmu-miR-136; mmu-miR-16; mmu-miR-125a-5p; mmu-miR-19a; mmu-miR-363-3p; mmu-miR-125b-5p; mmu-miR-323-3p; mmu-miR-151-5p; mmu-miR-34c; mmu-miR-330; mmu-miR-335-3p; mmu-miR-669f-3p; mmu-miR-367; mmu-miR-134; mmu-miR-669o-3p; mmu-miR-34a; mmu-miR-15a; mmu-miR-25; mmu-miR-468; mmu-miR-672; mmu-miR-421; mmu-miR-1952; mmu-miR-33; mmu-miR-15b; mmu-miR-19b
Hells	3.224	59	18.3002	mmu-miR-200a; mmu-miR-495; mmu-miR-93; mmu-miR-713; mmu-miR-335-5p; mmu-miR-467c; mmu-miR-150; mmu-miR-674; mmu-miR-369-3p; mmu-miR-20a; mmu-miR-340-5p; mmu-miR-466b-3p; mmu-miR-30d; mmu-miR-323-3p; mmu-miR-30a; mmu-miR-290-3p; mmu-miR-669f-3p; mmu-miR-467a; mmu-miR-30b; mmu-miR-468; mmu-miR-106a; mmu-miR-103; mmu-miR-182; mmu-miR-17; mmu-miR-26b; mmu-miR-381; mmu-miR-292-3p; mmu-miR-302a; mmu-mi…
Herc3	1.477	31	20.9885	mmu-miR-195; mmu-miR-297c; mmu-miR-1960; mmu-miR-145; mmu-miR-335-5p; mmu-miR-16; mmu-miR-431; mmu-miR-669d; mmu-miR-467f; mmu-miR-340-5p; mmu-miR-23b; mmu-miR-762; mmu-miR-376c; mmu-miR-434-3p; mmu-miR-1196; mmu-miR-181a; mmu-miR-335-3p; mmu-miR-205; mmu-miR-15a; mmu-miR-27a; mmu-miR-1198-5p; mmu-miR-33; mmu-miR-142-5p; mmu-miR-297a; mmu-miR-15b; mmu-miR-23a; mmu-miR-410
Hes6	0.575	5	8.69565	mmu-miR-1983; mmu-miR-674; mmu-miR-804; mmu-miR-22; mmu-miR-18b
Hhat	1.056	23	21.7803	mmu-miR-330; mmu-miR-760-3p; mmu-miR-378; mmu-miR-27a; mmu-miR-125a-5p; mmu-miR-541; mmu-miR-26b; mmu-miR-125b-5p; mmu-miR-23b; mmu-miR-376c; mmu-miR-1935; mmu-miR-26a; mmu-miR-292-5p; mmu-miR-23a
Hic2	4.262	128	30.0328	mmu-miR-145; mmu-miR-713; mmu-miR-335-5p; mmu-miR-431; mmu-miR-467c; mmu-miR-30d; mmu-miR-296-5p; mmu-miR-323-3p; mmu-miR-30a; mmu-miR-29c; mmu-miR-290-3p; mmu-let-7a; mmu-miR-129-2-3p; mmu-miR-202-3p; mmu-miR-672; mmu-miR-292-3p; mmu-miR-154; mmu-miR-129-1-3p; mmu-miR-302a; mmu-miR-302d; mmu-let-7g; mmu-miR-195; mmu-miR-433; mmu-miR-125a-5p; mmu-miR-760-5p; mmu-miR-1198-3p; mmu-miR-295; mmu-miR-…
Hipk2	3.745	73	19.4927	mmu-miR-495; mmu-miR-804; mmu-miR-713; mmu-miR-96; mmu-miR-150; mmu-miR-674; mmu-miR-296-5p; mmu-miR-291a-5p; mmu-miR-28; mmu-miR-205; mmu-miR-367; mmu-miR-291b-5p; mmu-miR-541; mmu-miR-103; mmu-miR-182; mmu-miR-129-2-3p; mmu-miR-1952; mmu-miR-129-1-3p; mmu-miR-423-5p; mmu-miR-466a-3p; mmu-miR-32; mmu-miR-433; mmu-miR-148b; mmu-miR-1960; mmu-miR-297c; mmu-miR-136; mmu-miR-125a-5p; mmu-miR-760-5p;…
Hirip3	0.48	5	10.4167	mmu-miR-484; mmu-miR-142-3p; mmu-miR-495; mmu-miR-132; mmu-miR-101b
Hist1h1c	0.88	14	15.9091	mmu-miR-1196; mmu-miR-495; mmu-miR-467e; mmu-miR-124; mmu-miR-760-3p; mmu-miR-543; mmu-miR-467h; mmu-miR-150; mmu-miR-421; mmu-miR-142-5p; mmu-miR-340-5p; mmu-miR-381; mmu-miR-292-5p; mmu-miR-377
Hist1h4i	0.376	3	7.97872	mmu-miR-762; mmu-miR-292-5p; mmu-miR-323-3p
Hist3h2a	1.7	18	10.5882	mmu-miR-467e; mmu-miR-145; mmu-miR-760-5p; mmu-miR-466g; mmu-miR-669d; mmu-miR-484; mmu-miR-23b; mmu-miR-323-3p; mmu-miR-1196; mmu-miR-330; mmu-miR-760-3p; mmu-miR-543; mmu-miR-382; mmu-miR-193b; mmu-miR-467h; mmu-miR-672; mmu-miR-23a; mmu-miR-410
Hist3h2ba	0.213	3	14.0845	mmu-miR-434-3p; mmu-miR-760-3p; mmu-miR-202-3p
Hmga2	3.014	68	22.5614	mmu-miR-495; mmu-miR-467e; mmu-miR-804; mmu-miR-200b; mmu-miR-466g; mmu-miR-340-5p; mmu-miR-466b-3p; mmu-miR-30d; mmu-miR-323-3p; mmu-miR-30a; mmu-miR-28; mmu-miR-181a; mmu-let-7a; mmu-miR-132; mmu-miR-669o-3p; mmu-miR-27a; mmu-miR-30b; mmu-miR-467h; mmu-miR-468; mmu-miR-421; mmu-miR-154; mmu-miR-669a-3p; mmu-let-7g; mmu-miR-195; mmu-miR-142-3p; mmu-miR-297c; mmu-miR-669l; mmu-miR-429; mmu-miR-13…
Hmgb2	1.872	33	17.6282	mmu-miR-466a-3p; mmu-miR-495; mmu-miR-1960; mmu-miR-148b; mmu-miR-429; mmu-miR-200b; mmu-miR-148a; mmu-miR-23b; mmu-miR-323-3p; mmu-miR-669o-5p; mmu-miR-152; mmu-miR-181a; mmu-miR-330; mmu-miR-335-3p; mmu-miR-669f-3p; mmu-miR-543; mmu-miR-200c; mmu-miR-26b; mmu-miR-421; mmu-miR-381; mmu-miR-26a; mmu-miR-23a; mmu-miR-410
Hmgb3	0.872	29	33.2569	mmu-miR-200a; mmu-miR-350; mmu-miR-148b; mmu-miR-93; mmu-miR-713; mmu-miR-429; mmu-miR-200b; mmu-miR-125a-5p; mmu-miR-148a; mmu-miR-20b; mmu-miR-674; mmu-miR-20a; mmu-miR-125b-5p; mmu-miR-30d; mmu-miR-30a; mmu-miR-141; mmu-miR-291b-3p; mmu-miR-152; mmu-miR-335-3p; mmu-miR-669f-3p; mmu-miR-27a; mmu-miR-30b; mmu-miR-106b; mmu-miR-532-5p; mmu-miR-106a; mmu-miR-17; mmu-miR-200c; mmu-miR-421; mmu-miR-…
Hmgn1	1.758	38	21.6155	mmu-miR-467e; mmu-miR-713; mmu-miR-130a; mmu-miR-130b; mmu-miR-369-3p; mmu-miR-669o-5p; mmu-miR-543; mmu-miR-367; mmu-miR-132; mmu-miR-669o-3p; mmu-miR-34a; mmu-miR-467h; mmu-miR-129-2-3p; mmu-miR-129-1-3p; mmu-miR-423-5p; mmu-miR-32; mmu-miR-669a-3p; mmu-miR-148b; mmu-miR-669l; mmu-miR-374; mmu-miR-148a; mmu-miR-363-3p; mmu-miR-669f-5p; mmu-miR-34c; mmu-miR-330; mmu-miR-152; mmu-miR-134; mmu-miR…
Hmgn2	0.8	16	20	mmu-miR-495; mmu-miR-124; mmu-miR-134; mmu-miR-382; mmu-miR-125a-5p; mmu-miR-532-5p; mmu-miR-150; mmu-miR-1224; mmu-miR-381; mmu-miR-125b-5p; mmu-miR-340-5p; mmu-miR-376c; mmu-miR-296-5p; mmu-miR-292-5p; mmu-miR-741
Hmox1	0.577	14	24.2634	mmu-miR-32; mmu-miR-760-3p; mmu-miR-367; mmu-miR-291b-5p; mmu-miR-134; mmu-miR-27a; mmu-miR-136; mmu-miR-872; mmu-miR-466g; mmu-miR-183; mmu-miR-25; mmu-miR-363-3p; mmu-miR-291a-5p; mmu-miR-377
Hnf1a	1.327	19	14.318	mmu-miR-29b; mmu-miR-145; mmu-miR-150; mmu-miR-467f; mmu-miR-296-5p; mmu-miR-205; mmu-miR-29a; mmu-miR-29c; mmu-miR-22; mmu-miR-27a; mmu-miR-191; mmu-miR-1983; mmu-miR-26b; mmu-miR-1952; mmu-miR-421; mmu-miR-26a
Hnrnpa0	1.517	28	18.4575	mmu-miR-200a; mmu-miR-350; mmu-miR-29b; mmu-miR-466g; mmu-miR-431; mmu-miR-669d; mmu-miR-340-5p; mmu-miR-376c; mmu-miR-30d; mmu-miR-30a; mmu-miR-434-3p; mmu-miR-141; mmu-miR-34c; mmu-miR-205; mmu-miR-29a; mmu-miR-29c; mmu-miR-543; mmu-miR-22; mmu-miR-34a; mmu-miR-382; mmu-miR-1198-5p; mmu-miR-30b; mmu-miR-532-5p; mmu-miR-129-2-3p; mmu-miR-26b; mmu-miR-26a; mmu-miR-129-1-3p
Hnrnpa1	0.714	25	35.014	mmu-miR-466a-3p; mmu-miR-32; mmu-miR-195; mmu-miR-433; mmu-miR-350; mmu-miR-297c; mmu-miR-96; mmu-miR-16; mmu-miR-363-3p; mmu-miR-467f; mmu-miR-377; mmu-miR-101b; mmu-miR-330; mmu-miR-34c; mmu-miR-760-3p; mmu-miR-367; mmu-miR-34a; mmu-miR-15a; mmu-miR-25; mmu-miR-421; mmu-miR-381; mmu-miR-1952; mmu-miR-297a; mmu-miR-15b
Hnrnpa2b1	2.842	87	30.6122	mmu-miR-200a; mmu-miR-467e; mmu-miR-93; mmu-miR-804; mmu-miR-713; mmu-miR-96; mmu-miR-431; mmu-miR-467c; mmu-miR-19a; mmu-miR-20a; mmu-miR-467f; mmu-miR-340-5p; mmu-miR-323-3p; mmu-miR-21; mmu-miR-290-3p; mmu-miR-205; mmu-miR-155; mmu-miR-669f-3p; mmu-miR-543; mmu-miR-132; mmu-miR-467a; mmu-miR-467h; mmu-miR-1983; mmu-miR-106a; mmu-miR-182; mmu-miR-17; mmu-miR-421; mmu-miR-381; mmu-miR-292-3p; mm…
Hnrpdl	1.429	24	16.795	mmu-miR-142-3p; mmu-miR-495; mmu-miR-1960; mmu-miR-148b; mmu-miR-669l; mmu-miR-148a; mmu-miR-669f-5p; mmu-miR-340-5p; mmu-miR-23b; mmu-miR-762; mmu-miR-669o-5p; mmu-miR-152; mmu-miR-21; mmu-miR-155; mmu-miR-669a-5p; mmu-miR-22; mmu-miR-27a; mmu-miR-532-5p; mmu-miR-672; mmu-miR-1952; mmu-miR-142-5p; mmu-miR-1935; mmu-miR-23a
Hoxa1	1.53	31	20.2614	mmu-miR-669l; mmu-miR-804; mmu-miR-713; mmu-miR-136; mmu-miR-125a-5p; mmu-miR-466g; mmu-miR-431; mmu-miR-669f-5p; mmu-miR-150; mmu-miR-674; mmu-miR-467f; mmu-miR-125b-5p; mmu-miR-762; mmu-miR-376c; mmu-miR-21; mmu-miR-330; mmu-miR-205; mmu-miR-669a-5p; mmu-miR-191; mmu-miR-183; mmu-miR-129-2-3p; mmu-miR-26b; mmu-miR-421; mmu-miR-1952; mmu-miR-129-1-3p; mmu-miR-26a; mmu-miR-292-5p; mmu-miR-423-5p
Hoxa7	1.635	39	23.8532	mmu-miR-200a; mmu-miR-93; mmu-miR-200b; mmu-miR-431; mmu-miR-150; mmu-miR-674; mmu-miR-20a; mmu-miR-296-5p; mmu-miR-434-3p; mmu-miR-205; mmu-miR-106a; mmu-miR-1983; mmu-miR-129-2-3p; mmu-miR-17; mmu-miR-672; mmu-miR-129-1-3p; mmu-miR-302a; mmu-miR-302d; mmu-miR-142-3p; mmu-miR-124; mmu-miR-669l; mmu-miR-429; mmu-miR-20b; mmu-miR-484; mmu-miR-669f-5p; mmu-miR-295; mmu-miR-377; mmu-miR-141; mmu-miR…
Hoxb2	0.383	5	13.0548	mmu-miR-1196; mmu-miR-495; mmu-miR-150; mmu-miR-340-5p; mmu-miR-142-5p
Hoxb7	0.532	4	7.5188	mmu-miR-350; mmu-miR-205; mmu-miR-669f-3p; mmu-miR-376c
Hoxb9	1.839	29	15.7694	mmu-miR-466a-3p; mmu-miR-195; mmu-miR-495; mmu-miR-350; mmu-miR-872; mmu-miR-16; mmu-miR-431; mmu-miR-1198-3p; mmu-miR-484; mmu-miR-762; mmu-miR-28; mmu-miR-181a; mmu-miR-205; mmu-miR-335-3p; mmu-miR-22; mmu-miR-378; mmu-miR-15a; mmu-miR-541; mmu-miR-103; mmu-miR-129-2-3p; mmu-miR-1224; mmu-miR-154; mmu-miR-1952; mmu-miR-129-1-3p; mmu-miR-15b; mmu-miR-423-5p
Hoxc9	0.96	19	19.7917	mmu-miR-200a; mmu-miR-495; mmu-miR-297c; mmu-miR-145; mmu-miR-429; mmu-miR-200b; mmu-miR-760-5p; mmu-miR-23b; mmu-miR-323-3p; mmu-miR-141; mmu-miR-330; mmu-miR-335-3p; mmu-miR-293; mmu-miR-378; mmu-miR-193b; mmu-miR-200c; mmu-miR-1952; mmu-miR-297a; mmu-miR-23a
Hpdl	0.243	3	12.3457	mmu-miR-124; mmu-miR-760-5p; mmu-miR-28
Hpn	0.371	3	8.08625	mmu-miR-330; mmu-miR-760-3p; mmu-miR-720
Hs2st1	4.782	110	23.0029	mmu-miR-145; mmu-miR-93; mmu-miR-96; mmu-miR-466g; mmu-miR-20a; mmu-miR-28; mmu-miR-21; mmu-miR-29c; mmu-miR-155; mmu-miR-367; mmu-let-7a; mmu-miR-541; mmu-miR-106a; mmu-miR-17; mmu-miR-672; mmu-miR-381; mmu-miR-154; mmu-miR-302a; mmu-miR-302d; mmu-let-7g; mmu-miR-433; mmu-miR-124; mmu-miR-148b; mmu-miR-1198-3p; mmu-miR-148a; mmu-miR-20b; mmu-miR-295; mmu-miR-23b; mmu-miR-377; mmu-miR-34c; mmu-mi…
Hs6st2	2.258	53	23.4721	mmu-miR-495; mmu-miR-467e; mmu-miR-145; mmu-miR-335-5p; mmu-miR-96; mmu-miR-466g; mmu-miR-431; mmu-miR-467c; mmu-miR-674; mmu-miR-467f; mmu-miR-340-5p; mmu-miR-30d; mmu-miR-323-3p; mmu-miR-30a; mmu-miR-669o-5p; mmu-miR-205; mmu-miR-290-3p; mmu-miR-669f-3p; mmu-miR-34a; mmu-miR-467a; mmu-miR-30b; mmu-miR-467h; mmu-miR-182; mmu-miR-292-3p; mmu-miR-302a; mmu-miR-423-5p; mmu-miR-302d; mmu-miR-466a-3p…
Hsd17b7	3.498	55	15.7233	mmu-miR-200a; mmu-miR-145; mmu-miR-804; mmu-miR-335-5p; mmu-miR-369-3p; mmu-miR-296-5p; mmu-miR-21; mmu-miR-181a; mmu-miR-205; mmu-miR-669o-3p; mmu-miR-27a; mmu-miR-1198-5p; mmu-miR-182; mmu-miR-1983; mmu-miR-672; mmu-miR-423-5p; mmu-miR-669a-3p; mmu-miR-466a-3p; mmu-miR-433; mmu-miR-1960; mmu-miR-669l; mmu-miR-136; mmu-miR-125a-5p; mmu-miR-374; mmu-miR-669d; mmu-miR-669f-5p; mmu-miR-720; mmu-miR…
Hspa4	1.798	55	30.5895	mmu-miR-200a; mmu-miR-495; mmu-miR-713; mmu-miR-335-5p; mmu-miR-200b; mmu-miR-431; mmu-miR-19a; mmu-miR-467f; mmu-miR-340-5p; mmu-miR-291a-5p; mmu-miR-181a; mmu-miR-669f-3p; mmu-miR-367; mmu-miR-291b-5p; mmu-miR-302a; mmu-miR-19b; mmu-miR-466a-3p; mmu-miR-302d; mmu-miR-32; mmu-miR-297c; mmu-miR-429; mmu-miR-136; mmu-miR-669d; mmu-miR-363-3p; mmu-miR-295; mmu-miR-18b; mmu-miR-23b; mmu-miR-762; mmu…
Hus1	3.713	72	19.3913	mmu-miR-495; mmu-miR-145; mmu-miR-93; mmu-miR-200b; mmu-miR-431; mmu-miR-150; mmu-miR-20a; mmu-miR-340-5p; mmu-miR-291a-5p; mmu-miR-28; mmu-miR-21; mmu-miR-205; mmu-miR-155; mmu-miR-291b-5p; mmu-miR-34a; mmu-miR-27a; mmu-miR-1198-5p; mmu-miR-541; mmu-miR-468; mmu-miR-106a; mmu-miR-103; mmu-miR-17; mmu-miR-672; mmu-miR-421; mmu-miR-381; mmu-miR-154; mmu-miR-302a; mmu-miR-466a-3p; mmu-miR-302d; mmu…
Ick	4.353	107	24.5807	mmu-miR-495; mmu-miR-145; mmu-miR-804; mmu-miR-466g; mmu-miR-431; mmu-miR-466b-3p; mmu-miR-30d; mmu-miR-296-5p; mmu-miR-323-3p; mmu-miR-30a; mmu-miR-669f-3p; mmu-miR-367; mmu-let-7a; mmu-miR-129-2-3p; mmu-miR-202-3p; mmu-miR-672; mmu-miR-381; mmu-miR-129-1-3p; mmu-miR-669a-3p; mmu-miR-466a-3p; mmu-let-7g; mmu-miR-195; mmu-miR-760-5p; mmu-miR-1198-3p; mmu-miR-377; mmu-miR-466c-3p; mmu-miR-34c; mmu…
Id1	0.563	18	31.9716	mmu-miR-142-3p; mmu-miR-1960; mmu-miR-148b; mmu-miR-93; mmu-miR-760-5p; mmu-miR-148a; mmu-miR-20b; mmu-miR-20a; mmu-miR-762; mmu-miR-152; mmu-miR-330; mmu-miR-335-3p; mmu-miR-669f-3p; mmu-miR-760-3p; mmu-miR-106b; mmu-miR-106a; mmu-miR-17; mmu-miR-381
Id3	0.536	9	16.791	mmu-miR-466a-3p; mmu-miR-669f-3p; mmu-miR-760-5p; mmu-miR-466g; mmu-miR-484; mmu-miR-340-5p; mmu-miR-1935; mmu-miR-762
Idh2	0.849	9	10.6007	mmu-miR-466c-3p; mmu-miR-484; mmu-miR-330; mmu-miR-1945; mmu-miR-124; mmu-miR-466b-3p; mmu-miR-1935; mmu-miR-760-5p
Ifih1	2.111	25	11.8427	mmu-miR-669a-3p; mmu-miR-195; mmu-miR-433; mmu-miR-200a; mmu-miR-297c; mmu-miR-16; mmu-miR-484; mmu-miR-674; mmu-miR-30d; mmu-miR-323-3p; mmu-miR-30a; mmu-miR-28; mmu-miR-101b; mmu-miR-1196; mmu-miR-141; mmu-miR-34c; mmu-miR-669o-3p; mmu-miR-34a; mmu-miR-15a; mmu-miR-30b; mmu-miR-129-2-3p; mmu-miR-129-1-3p; mmu-miR-297a; mmu-miR-15b
Ifngr2	2.164	21	9.70425	mmu-miR-200a; mmu-miR-495; mmu-miR-350; mmu-miR-29b; mmu-miR-804; mmu-miR-713; mmu-miR-150; mmu-miR-18b; mmu-miR-23b; mmu-miR-762; mmu-miR-296-5p; mmu-miR-141; mmu-miR-34c; mmu-miR-155; mmu-miR-29a; mmu-miR-29c; mmu-miR-34a; mmu-miR-23a; mmu-miR-423-5p
Igf2bp1	6.337	118	18.6208	mmu-miR-495; mmu-miR-145; mmu-miR-96; mmu-miR-431; mmu-miR-467c; mmu-miR-340-5p; mmu-miR-28; mmu-miR-29c; mmu-miR-290-3p; mmu-miR-367; mmu-miR-129-2-3p; mmu-miR-292-3p; mmu-miR-154; mmu-miR-129-1-3p; mmu-miR-302a; mmu-miR-466a-3p; mmu-miR-302d; mmu-miR-195; mmu-miR-669l; mmu-miR-125a-5p; mmu-miR-669f-5p; mmu-miR-295; mmu-miR-720; mmu-miR-125b-5p; mmu-miR-23b; mmu-miR-377; mmu-miR-1196; mmu-miR-34…
Igfbp4	2.813	52	18.4856	mmu-miR-200a; mmu-miR-495; mmu-miR-29b; mmu-miR-93; mmu-miR-804; mmu-miR-713; mmu-miR-466g; mmu-miR-19a; mmu-miR-674; mmu-miR-20a; mmu-miR-466b-3p; mmu-miR-296-5p; mmu-miR-29c; mmu-miR-1198-5p; mmu-miR-106a; mmu-miR-103; mmu-miR-17; mmu-miR-202-3p; mmu-miR-672; mmu-miR-1952; mmu-miR-423-5p; mmu-miR-19b; mmu-miR-195; mmu-miR-433; mmu-miR-297c; mmu-miR-136; mmu-miR-16; mmu-miR-760-5p; mmu-miR-484; …
Igsf9	2.139	43	20.1029	mmu-miR-335-5p; mmu-miR-150; mmu-miR-674; mmu-miR-296-5p; mmu-miR-181a; mmu-let-7a; mmu-miR-34a; mmu-miR-1983; mmu-miR-103; mmu-miR-129-2-3p; mmu-miR-202-3p; mmu-miR-1952; mmu-miR-129-1-3p; mmu-miR-423-5p; mmu-let-7g; mmu-miR-195; mmu-miR-350; mmu-miR-125a-5p; mmu-miR-16; mmu-miR-760-5p; mmu-miR-669d; mmu-miR-484; mmu-miR-125b-5p; mmu-let-7c; mmu-miR-377; mmu-miR-34c; mmu-miR-127; mmu-miR-760-3p;…
Ihh	0.774	13	16.7959	mmu-miR-205; mmu-miR-124; mmu-miR-760-3p; mmu-miR-134; mmu-miR-382; mmu-miR-378; mmu-miR-27a; mmu-miR-1198-3p; mmu-miR-182; mmu-miR-672; mmu-miR-296-5p; mmu-miR-377
Il17d	0.525	11	20.9524	mmu-miR-669o-5p; mmu-miR-21; mmu-miR-152; mmu-miR-142-3p; mmu-miR-148b; mmu-miR-291b-5p; mmu-miR-148a; mmu-miR-103; mmu-miR-142-5p; mmu-miR-340-5p; mmu-miR-291a-5p
Il4ra	2.418	52	21.5054	mmu-miR-804; mmu-miR-713; mmu-miR-335-5p; mmu-miR-466g; mmu-miR-150; mmu-miR-296-5p; mmu-miR-181a; mmu-miR-290-3p; mmu-miR-205; mmu-let-7a; mmu-miR-34a; mmu-miR-467a; mmu-miR-26b; mmu-miR-202-3p; mmu-miR-421; mmu-miR-292-3p; mmu-let-7g; mmu-miR-195; mmu-miR-124; mmu-miR-1960; mmu-miR-125a-5p; mmu-miR-16; mmu-miR-760-5p; mmu-miR-484; mmu-miR-125b-5p; mmu-miR-762; mmu-miR-376c; mmu-let-7c; mmu-miR-…
Ilf3	1.302	20	15.361	mmu-miR-433; mmu-miR-19a; mmu-miR-674; mmu-miR-23b; mmu-miR-377; mmu-miR-323-3p; mmu-miR-34c; mmu-miR-760-3p; mmu-miR-132; mmu-miR-669f-3p; mmu-miR-34a; mmu-miR-191; mmu-miR-532-5p; mmu-miR-103; mmu-miR-329; mmu-miR-381; mmu-miR-23a; mmu-miR-19b
Immp2l	0.488	20	40.9836	mmu-miR-195; mmu-miR-34c; mmu-miR-290-3p; mmu-miR-669f-3p; mmu-miR-429; mmu-miR-34a; mmu-miR-467a; mmu-miR-27a; mmu-miR-15a; mmu-miR-200b; mmu-miR-16; mmu-miR-669d; mmu-miR-369-3p; mmu-miR-200c; mmu-miR-292-3p; mmu-miR-15b
Impact	2.39	55	23.0126	mmu-miR-200a; mmu-miR-495; mmu-miR-467e; mmu-miR-804; mmu-miR-96; mmu-miR-200b; mmu-miR-150; mmu-miR-674; mmu-miR-467f; mmu-miR-30d; mmu-miR-291a-5p; mmu-miR-30a; mmu-miR-28; mmu-miR-291b-5p; mmu-miR-27a; mmu-miR-30b; mmu-miR-1198-5p; mmu-miR-467h; mmu-miR-1983; mmu-miR-103; mmu-miR-182; mmu-miR-672; mmu-miR-466a-3p; mmu-miR-195; mmu-miR-124; mmu-miR-148b; mmu-miR-1960; mmu-miR-429; mmu-miR-16; m…
Ing5	4.392	92	20.9472	mmu-miR-145; mmu-miR-713; mmu-miR-335-5p; mmu-miR-466g; mmu-miR-431; mmu-miR-19a; mmu-miR-340-5p; mmu-miR-323-3p; mmu-miR-29c; mmu-miR-669f-3p; mmu-miR-367; mmu-miR-191; mmu-miR-672; mmu-miR-466a-3p; mmu-miR-433; mmu-miR-124; mmu-miR-148b; mmu-miR-125a-5p; mmu-miR-760-5p; mmu-miR-148a; mmu-miR-125b-5p; mmu-miR-377; mmu-miR-1196; mmu-miR-34c; mmu-miR-330; mmu-miR-152; mmu-miR-335-3p; mmu-miR-127; …
Inhba	0.082	3	36.5854	mmu-miR-330; mmu-miR-378
Inhbb	1.857	34	18.3091	mmu-miR-713; mmu-miR-467f; mmu-miR-28; mmu-miR-290-3p; mmu-let-7a; mmu-miR-34a; mmu-miR-467a; mmu-miR-1198-5p; mmu-miR-468; mmu-miR-1983; mmu-miR-202-3p; mmu-miR-292-3p; mmu-let-7g; mmu-miR-466a-3p; mmu-miR-297c; mmu-miR-125a-5p; mmu-miR-125b-5p; mmu-miR-376c; mmu-miR-762; mmu-let-7c; mmu-miR-101b; mmu-miR-330; mmu-miR-34c; mmu-miR-134; mmu-miR-22; mmu-miR-378; mmu-miR-382; mmu-miR-183; mmu-let-7…
Inpp5a	1.306	29	22.2052	mmu-let-7g; mmu-miR-142-3p; mmu-miR-495; mmu-miR-1960; mmu-miR-148b; mmu-miR-96; mmu-miR-148a; mmu-miR-484; mmu-miR-150; mmu-miR-23b; mmu-miR-296-5p; mmu-let-7c; mmu-miR-151-5p; mmu-miR-34c; mmu-miR-152; mmu-miR-181a; mmu-let-7a; mmu-miR-34a; mmu-miR-183; mmu-let-7e; mmu-miR-182; mmu-miR-329; mmu-miR-202-3p; mmu-miR-1935; mmu-miR-23a
Ip6k1	2.81	74	26.3345	mmu-miR-200a; mmu-miR-29b; mmu-miR-93; mmu-miR-200b; mmu-miR-150; mmu-miR-20a; mmu-miR-30d; mmu-miR-291a-5p; mmu-miR-30a; mmu-miR-669o-5p; mmu-miR-29c; mmu-miR-205; mmu-miR-669f-3p; mmu-miR-291b-5p; mmu-miR-132; mmu-miR-30b; mmu-miR-1983; mmu-miR-106a; mmu-miR-182; mmu-miR-129-2-3p; mmu-miR-17; mmu-miR-1952; mmu-miR-129-1-3p; mmu-miR-302a; mmu-miR-423-5p; mmu-miR-302d; mmu-miR-195; mmu-miR-142-3p…
Irf1	0.877	31	35.3478	mmu-miR-466a-3p; mmu-miR-1960; mmu-miR-124; mmu-miR-93; mmu-miR-335-5p; mmu-miR-130a; mmu-miR-125a-5p; mmu-miR-760-5p; mmu-miR-20b; mmu-miR-130b; mmu-miR-20a; mmu-miR-340-5p; mmu-miR-23b; mmu-miR-125b-5p; mmu-miR-30d; mmu-miR-30a; mmu-miR-290-3p; mmu-miR-669f-3p; mmu-miR-467a; mmu-miR-27a; mmu-miR-30b; mmu-miR-301a; mmu-miR-106b; mmu-miR-423-3p; mmu-miR-106a; mmu-miR-1983; mmu-miR-17; mmu-miR-122…
Irf6	2.517	39	15.4946	mmu-miR-433; mmu-miR-142-3p; mmu-miR-804; mmu-miR-713; mmu-miR-429; mmu-miR-335-5p; mmu-miR-96; mmu-miR-136; mmu-miR-200b; mmu-miR-760-5p; mmu-miR-150; mmu-miR-23b; mmu-miR-18b; mmu-miR-376c; mmu-miR-741; mmu-miR-377; mmu-miR-34c; mmu-miR-335-3p; mmu-miR-543; mmu-miR-34a; mmu-miR-378; mmu-miR-27a; mmu-miR-129-2-3p; mmu-miR-200c; mmu-miR-672; mmu-miR-421; mmu-miR-154; mmu-miR-142-5p; mmu-miR-33; m…
Irgm1	0.556	6	10.7914	mmu-miR-674; mmu-miR-335-5p; mmu-miR-33; mmu-miR-1952; mmu-miR-142-5p; mmu-miR-872
Irs4	2.578	51	19.7828	mmu-miR-200a; mmu-miR-145; mmu-miR-93; mmu-miR-200b; mmu-miR-466g; mmu-miR-674; mmu-miR-369-3p; mmu-miR-20a; mmu-miR-323-3p; mmu-miR-434-3p; mmu-miR-181a; mmu-miR-543; mmu-miR-132; mmu-miR-669o-3p; mmu-miR-126-3p; mmu-miR-27a; mmu-miR-1198-5p; mmu-miR-106a; mmu-miR-17; mmu-miR-26b; mmu-miR-669a-3p; mmu-miR-466a-3p; mmu-miR-148b; mmu-miR-1960; mmu-miR-350; mmu-miR-429; mmu-miR-125a-5p; mmu-miR-374…
Irx2	0.958	22	22.9645	mmu-let-7g; mmu-miR-148b; mmu-miR-713; mmu-miR-148a; mmu-miR-467f; mmu-miR-340-5p; mmu-miR-291a-5p; mmu-let-7c; mmu-miR-377; mmu-miR-323-3p; mmu-miR-152; mmu-miR-34c; mmu-miR-335-3p; mmu-miR-760-3p; mmu-miR-669f-3p; mmu-let-7a; mmu-miR-291b-5p; mmu-miR-34a; mmu-miR-541; mmu-let-7e; mmu-miR-202-3p; mmu-miR-466f
Itga11	1.283	31	24.1621	mmu-miR-29b; mmu-miR-1960; mmu-miR-148b; mmu-miR-145; mmu-miR-124; mmu-miR-335-5p; mmu-miR-96; mmu-miR-148a; mmu-miR-484; mmu-miR-150; mmu-miR-762; mmu-miR-296-5p; mmu-miR-28; mmu-miR-330; mmu-miR-152; mmu-miR-29c; mmu-miR-29a; mmu-miR-126-3p; mmu-miR-27a; mmu-miR-1198-5p; mmu-miR-193b; mmu-miR-541; mmu-miR-376b; mmu-miR-182; mmu-miR-129-2-3p; mmu-miR-672; mmu-miR-154; mmu-miR-129-1-3p
Itga3	1.321	18	13.626	mmu-miR-1960; mmu-miR-148b; mmu-miR-335-5p; mmu-miR-125a-5p; mmu-miR-148a; mmu-miR-484; mmu-miR-125b-5p; mmu-miR-152; mmu-miR-205; mmu-miR-134; mmu-miR-22; mmu-miR-468; mmu-miR-129-2-3p; mmu-miR-1952; mmu-miR-1935; mmu-miR-129-1-3p
Itga7	0.426	10	23.4742	mmu-miR-297c; mmu-miR-124; mmu-miR-378; mmu-miR-136; mmu-miR-125a-5p; mmu-miR-125b-5p; mmu-miR-297a; mmu-miR-762
Itga8	3.064	89	29.047	mmu-miR-200a; mmu-miR-29b; mmu-miR-145; mmu-miR-93; mmu-miR-804; mmu-miR-96; mmu-miR-200b; mmu-miR-19a; mmu-miR-369-3p; mmu-miR-20a; mmu-miR-467f; mmu-miR-340-5p; mmu-miR-296-5p; mmu-miR-28; mmu-miR-434-3p; mmu-miR-669o-5p; mmu-miR-29c; mmu-miR-155; mmu-miR-1198-5p; mmu-miR-468; mmu-miR-106a; mmu-miR-182; mmu-miR-17; mmu-miR-421; mmu-miR-381; mmu-miR-302a; mmu-miR-19b; mmu-miR-302d; mmu-miR-148b;…
Itgb3	3.331	70	21.0147	mmu-miR-495; mmu-miR-29b; mmu-miR-713; mmu-miR-467c; mmu-miR-369-3p; mmu-miR-467f; mmu-miR-340-5p; mmu-miR-30d; mmu-miR-296-5p; mmu-miR-30a; mmu-miR-181a; mmu-miR-29c; mmu-miR-290-3p; mmu-miR-205; mmu-miR-669f-3p; mmu-miR-543; mmu-miR-367; mmu-let-7a; mmu-miR-132; mmu-miR-467a; mmu-miR-30b; mmu-miR-468; mmu-miR-672; mmu-miR-421; mmu-miR-292-3p; mmu-miR-1952; mmu-miR-302a; mmu-miR-32; mmu-let-7g; …
Itpa	0.533	8	15.0094	mmu-miR-669o-5p; mmu-miR-495; mmu-miR-669l; mmu-miR-669a-5p; mmu-miR-382; mmu-miR-669f-5p; mmu-miR-329; mmu-miR-1935
Itpka	0.396	12	30.303	mmu-miR-330; mmu-miR-142-3p; mmu-miR-145; mmu-miR-669f-3p; mmu-miR-130a; mmu-miR-301a; mmu-miR-183; mmu-miR-669d; mmu-miR-19a; mmu-miR-130b; mmu-miR-762; mmu-miR-19b
Jam2	3.109	85	27.34	mmu-miR-495; mmu-miR-467e; mmu-miR-93; mmu-miR-804; mmu-miR-335-5p; mmu-miR-96; mmu-miR-130a; mmu-miR-19a; mmu-miR-130b; mmu-miR-369-3p; mmu-miR-20a; mmu-miR-467f; mmu-miR-340-5p; mmu-miR-466b-3p; mmu-miR-291a-5p; mmu-miR-323-3p; mmu-miR-28; mmu-miR-669o-5p; mmu-miR-21; mmu-miR-181a; mmu-miR-205; mmu-miR-669f-3p; mmu-miR-291b-5p; mmu-miR-34a; mmu-miR-27a; mmu-miR-1198-5p; mmu-miR-467h; mmu-miR-10…
Jun	1.233	25	20.2758	mmu-miR-302d; mmu-miR-142-3p; mmu-miR-495; mmu-miR-297c; mmu-miR-374; mmu-miR-1198-3p; mmu-miR-467c; mmu-miR-369-3p; mmu-miR-295; mmu-miR-762; mmu-miR-291b-3p; mmu-miR-290-3p; mmu-miR-543; mmu-miR-467a; mmu-miR-291a-3p; mmu-miR-292-3p; mmu-miR-142-5p; mmu-miR-297a; mmu-miR-292-5p; mmu-miR-302a; mmu-miR-423-5p; mmu-miR-294; mmu-miR-410
Kbtbd2	1.354	22	16.2482	mmu-miR-200a; mmu-miR-297c; mmu-miR-713; mmu-miR-136; mmu-miR-872; mmu-miR-374; mmu-miR-760-5p; mmu-miR-369-3p; mmu-miR-323-3p; mmu-miR-141; mmu-miR-155; mmu-miR-543; mmu-miR-134; mmu-miR-129-2-3p; mmu-miR-1952; mmu-miR-154; mmu-miR-129-1-3p; mmu-miR-297a; mmu-miR-292-5p; mmu-miR-410
Kcna6	3.499	58	16.5762	mmu-miR-200a; mmu-miR-804; mmu-miR-335-5p; mmu-miR-96; mmu-miR-466g; mmu-miR-19a; mmu-miR-150; mmu-miR-340-5p; mmu-miR-291a-5p; mmu-miR-323-3p; mmu-miR-28; mmu-miR-669o-5p; mmu-miR-543; mmu-miR-291b-5p; mmu-miR-468; mmu-miR-103; mmu-miR-182; mmu-miR-26b; mmu-miR-421; mmu-miR-1952; mmu-miR-19b; mmu-miR-297c; mmu-miR-136; mmu-miR-125a-5p; mmu-miR-760-5p; mmu-miR-484; mmu-miR-125b-5p; mmu-miR-18b; m…
Kcnk1	0.932	18	19.3133	mmu-miR-466c-3p; mmu-miR-145; mmu-miR-760-3p; mmu-miR-132; mmu-miR-126-3p; mmu-miR-532-5p; mmu-miR-183; mmu-miR-541; mmu-miR-1983; mmu-miR-26b; mmu-miR-340-5p; mmu-miR-142-5p; mmu-miR-466b-3p; mmu-miR-26a; mmu-miR-487b
Kcnk6	3.108	50	16.0875	mmu-miR-29b; mmu-miR-93; mmu-miR-804; mmu-miR-713; mmu-miR-335-5p; mmu-miR-130a; mmu-miR-431; mmu-miR-130b; mmu-miR-20a; mmu-miR-467f; mmu-miR-434-3p; mmu-miR-29c; mmu-miR-290-3p; mmu-miR-155; mmu-miR-669f-3p; mmu-let-7a; mmu-miR-467a; mmu-miR-27a; mmu-miR-1198-5p; mmu-miR-106a; mmu-miR-17; mmu-miR-202-3p; mmu-miR-381; mmu-miR-292-3p; mmu-let-7g; mmu-miR-872; mmu-miR-760-5p; mmu-miR-20b; mmu-miR-…
Kcns3	1.019	16	15.7017	mmu-miR-466c-3p; mmu-miR-434-3p; mmu-miR-181a; mmu-miR-335-3p; mmu-miR-872; mmu-miR-532-5p; mmu-miR-484; mmu-miR-150; mmu-miR-26b; mmu-miR-340-5p; mmu-miR-154; mmu-miR-23b; mmu-miR-466b-3p; mmu-miR-26a; mmu-miR-23a; mmu-miR-28
Kctd3	1.913	38	19.8641	mmu-miR-29b; mmu-miR-145; mmu-miR-93; mmu-miR-431; mmu-miR-150; mmu-miR-674; mmu-miR-20a; mmu-miR-466b-3p; mmu-miR-296-5p; mmu-miR-28; mmu-miR-434-3p; mmu-miR-669o-5p; mmu-miR-181a; mmu-miR-29c; mmu-miR-205; mmu-miR-106a; mmu-miR-103; mmu-miR-129-2-3p; mmu-miR-17; mmu-miR-421; mmu-miR-129-1-3p; mmu-miR-466a-3p; mmu-miR-125a-5p; mmu-miR-20b; mmu-miR-125b-5p; mmu-miR-377; mmu-miR-466c-3p; mmu-miR-1…
Kif11	1.469	26	17.6991	mmu-miR-466a-3p; mmu-let-7g; mmu-miR-467e; mmu-miR-466g; mmu-miR-340-5p; mmu-miR-376c; mmu-let-7c; mmu-miR-377; mmu-miR-28; mmu-miR-335-3p; mmu-miR-669f-3p; mmu-let-7a; mmu-miR-467h; mmu-miR-541; mmu-let-7e; mmu-miR-142-5p; mmu-miR-381; mmu-miR-421; mmu-miR-410
Kif15	0.598	10	16.7224	mmu-miR-669a-3p; mmu-miR-495; mmu-miR-291b-5p; mmu-miR-132; mmu-miR-669o-3p; mmu-miR-27a; mmu-miR-466g; mmu-miR-376b; mmu-miR-33; mmu-miR-291a-5p
Kif1a	2.993	58	19.3785	mmu-miR-200a; mmu-miR-495; mmu-miR-145; mmu-miR-804; mmu-miR-713; mmu-miR-466g; mmu-miR-19a; mmu-miR-296-5p; mmu-miR-291a-5p; mmu-miR-323-3p; mmu-miR-290-3p; mmu-miR-669f-3p; mmu-miR-291b-5p; mmu-miR-132; mmu-miR-669o-3p; mmu-miR-467a; mmu-miR-27a; mmu-miR-541; mmu-miR-129-2-3p; mmu-miR-672; mmu-miR-292-3p; mmu-miR-1952; mmu-miR-129-1-3p; mmu-miR-423-5p; mmu-miR-19b; mmu-miR-669a-3p; mmu-miR-466a…
Kif20a	0.65	9	13.8462	mmu-miR-466c-3p; mmu-miR-369-3p; mmu-miR-466b-3p; mmu-miR-376c; mmu-miR-374; mmu-miR-28; mmu-miR-1198-3p
Kif23	0.384	8	20.8333	mmu-miR-495; mmu-miR-335-3p; mmu-miR-297c; mmu-miR-124; mmu-miR-134; mmu-miR-22; mmu-miR-193b; mmu-miR-297a
Kif24	1.367	16	11.7045	mmu-miR-195; mmu-miR-330; mmu-miR-495; mmu-miR-205; mmu-miR-760-3p; mmu-miR-15a; mmu-miR-16; mmu-miR-431; mmu-miR-669d; mmu-miR-468; mmu-miR-150; mmu-miR-1224; mmu-miR-340-5p; mmu-miR-762; mmu-miR-15b
Kif26a	1.115	19	17.0404	mmu-miR-669a-3p; mmu-miR-466a-3p; mmu-miR-495; mmu-miR-350; mmu-miR-29b; mmu-miR-124; mmu-miR-335-5p; mmu-miR-431; mmu-miR-1198-3p; mmu-miR-484; mmu-miR-376c; mmu-miR-741; mmu-miR-323-3p; mmu-miR-29a; mmu-miR-29c; mmu-miR-132; mmu-miR-669o-3p; mmu-miR-22; mmu-miR-378
Kif26b	6.972	159	22.8055	mmu-miR-495; mmu-miR-93; mmu-miR-804; mmu-miR-713; mmu-miR-96; mmu-miR-466g; mmu-miR-431; mmu-miR-19a; mmu-miR-20a; mmu-miR-466b-3p; mmu-miR-30d; mmu-miR-296-5p; mmu-miR-30a; mmu-miR-28; mmu-miR-434-3p; mmu-miR-29c; mmu-miR-155; mmu-miR-669f-3p; mmu-miR-367; mmu-miR-541; mmu-miR-106a; mmu-miR-17; mmu-miR-129-2-3p; mmu-miR-672; mmu-miR-129-1-3p; mmu-miR-302a; mmu-miR-466a-3p; mmu-miR-302d; mmu-miR…
Kifc1	0.167	1	5.98802	mmu-miR-127
Kit	2.177	56	25.7235	mmu-miR-145; mmu-miR-93; mmu-miR-713; mmu-miR-130a; mmu-miR-431; mmu-miR-19a; mmu-miR-130b; mmu-miR-150; mmu-miR-20a; mmu-miR-340-5p; mmu-miR-466b-3p; mmu-miR-296-5p; mmu-miR-28; mmu-miR-205; mmu-miR-669f-3p; mmu-miR-27a; mmu-miR-106a; mmu-miR-103; mmu-miR-17; mmu-miR-26b; mmu-miR-421; mmu-miR-381; mmu-miR-19b; mmu-miR-466a-3p; mmu-miR-195; mmu-miR-136; mmu-miR-16; mmu-miR-760-5p; mmu-miR-20b; mm…
Klf2	0.737	14	18.9959	mmu-miR-32; mmu-miR-760-3p; mmu-miR-669f-3p; mmu-miR-543; mmu-miR-367; mmu-miR-713; mmu-miR-27a; mmu-miR-760-5p; mmu-miR-25; mmu-miR-363-3p; mmu-miR-340-5p; mmu-miR-381; mmu-miR-1935
Klf6	3.11	70	22.508	mmu-miR-200a; mmu-miR-93; mmu-miR-200b; mmu-miR-431; mmu-miR-19a; mmu-miR-20a; mmu-miR-467f; mmu-miR-466b-3p; mmu-miR-669o-5p; mmu-miR-21; mmu-miR-181a; mmu-miR-543; mmu-miR-367; mmu-miR-27a; mmu-miR-1198-5p; mmu-miR-1983; mmu-miR-106a; mmu-miR-129-2-3p; mmu-miR-17; mmu-miR-421; mmu-miR-381; mmu-miR-154; mmu-miR-129-1-3p; mmu-miR-302a; mmu-miR-19b; mmu-miR-466a-3p; mmu-miR-32; mmu-miR-302d; mmu-m…
Klhdc8a	2.565	55	21.4425	mmu-miR-713; mmu-miR-335-5p; mmu-miR-130a; mmu-miR-130b; mmu-miR-674; mmu-miR-28; mmu-miR-205; mmu-let-7a; mmu-miR-34a; mmu-miR-27a; mmu-miR-1198-5p; mmu-miR-541; mmu-miR-468; mmu-miR-1983; mmu-miR-202-3p; mmu-miR-26b; mmu-miR-672; mmu-miR-1952; mmu-miR-423-5p; mmu-let-7g; mmu-miR-433; mmu-miR-124; mmu-miR-297c; mmu-miR-669l; mmu-miR-760-5p; mmu-miR-669f-5p; mmu-miR-18b; mmu-miR-762; mmu-let-7c; …
Klhl15	4.259	109	25.5929	mmu-miR-495; mmu-miR-145; mmu-miR-93; mmu-miR-335-5p; mmu-miR-466g; mmu-miR-467c; mmu-miR-19a; mmu-miR-20a; mmu-miR-340-5p; mmu-miR-30d; mmu-miR-323-3p; mmu-miR-30a; mmu-miR-21; mmu-miR-155; mmu-miR-669f-3p; mmu-miR-367; mmu-let-7a; mmu-miR-106a; mmu-miR-17; mmu-miR-129-2-3p; mmu-miR-202-3p; mmu-miR-672; mmu-miR-381; mmu-miR-154; mmu-miR-129-1-3p; mmu-miR-466a-3p; mmu-let-7g; mmu-miR-195; mmu-miR…
Klhl20	2.052	26	12.6706	mmu-miR-466a-3p; mmu-miR-29b; mmu-miR-145; mmu-miR-467f; mmu-miR-340-5p; mmu-miR-30d; mmu-miR-30a; mmu-miR-28; mmu-miR-669o-5p; mmu-miR-181a; mmu-miR-29a; mmu-miR-29c; mmu-miR-335-3p; mmu-miR-669f-3p; mmu-miR-543; mmu-miR-293; mmu-miR-99b; mmu-miR-382; mmu-miR-1198-5p; mmu-miR-30b; mmu-miR-532-5p; mmu-miR-1983; mmu-miR-376b; mmu-miR-33
Klhl25	1.457	28	19.2176	mmu-miR-29b; mmu-miR-124; mmu-miR-335-5p; mmu-miR-130a; mmu-miR-125a-5p; mmu-miR-19a; mmu-miR-484; mmu-miR-130b; mmu-miR-340-5p; mmu-miR-18b; mmu-miR-125b-5p; mmu-miR-762; mmu-miR-29c; mmu-miR-127; mmu-miR-29a; mmu-miR-760-3p; mmu-miR-543; mmu-miR-134; mmu-miR-293; mmu-miR-378; mmu-miR-301a; mmu-miR-193b; mmu-miR-468; mmu-miR-1224; mmu-miR-1952; mmu-miR-19b
Kndc1	1.579	38	24.0659	mmu-miR-495; mmu-miR-350; mmu-miR-29b; mmu-miR-1960; mmu-miR-124; mmu-miR-93; mmu-miR-130a; mmu-miR-872; mmu-miR-19a; mmu-miR-484; mmu-miR-20b; mmu-miR-130b; mmu-miR-20a; mmu-miR-340-5p; mmu-miR-330; mmu-miR-29c; mmu-miR-29a; mmu-miR-132; mmu-miR-22; mmu-miR-382; mmu-miR-301a; mmu-miR-106b; mmu-miR-1198-5p; mmu-miR-106a; mmu-miR-129-2-3p; mmu-miR-17; mmu-miR-1224; mmu-miR-421; mmu-miR-154; mmu-mi…
Kpna1	3.223	92	28.5448	mmu-miR-467c; mmu-miR-19a; mmu-miR-340-5p; mmu-miR-466b-3p; mmu-miR-323-3p; mmu-miR-434-3p; mmu-miR-29c; mmu-miR-290-3p; mmu-miR-155; mmu-let-7a; mmu-miR-541; mmu-miR-202-3p; mmu-miR-672; mmu-miR-292-3p; mmu-miR-154; mmu-miR-302a; mmu-miR-466a-3p; mmu-miR-302d; mmu-let-7g; mmu-miR-195; mmu-miR-433; mmu-miR-148b; mmu-miR-669l; mmu-miR-136; mmu-miR-148a; mmu-miR-669f-5p; mmu-miR-295; mmu-miR-23b; m…
Kpna4	6.94	143	20.6052	mmu-miR-93; mmu-miR-804; mmu-miR-713; mmu-miR-335-5p; mmu-miR-466g; mmu-miR-431; mmu-miR-20a; mmu-miR-340-5p; mmu-miR-466b-3p; mmu-miR-30d; mmu-miR-30a; mmu-miR-28; mmu-miR-434-3p; mmu-miR-290-3p; mmu-miR-669f-3p; mmu-miR-367; mmu-miR-468; mmu-miR-106a; mmu-miR-17; mmu-miR-129-2-3p; mmu-miR-672; mmu-miR-381; mmu-miR-292-3p; mmu-miR-154; mmu-miR-129-1-3p; mmu-miR-669a-3p; mmu-miR-466a-3p; mmu-miR-…
Ksr2	9.44	148	15.678	mmu-miR-145; mmu-miR-804; mmu-miR-335-5p; mmu-miR-466g; mmu-miR-431; mmu-miR-467c; mmu-miR-340-5p; mmu-miR-30d; mmu-miR-323-3p; mmu-miR-30a; mmu-miR-29c; mmu-miR-290-3p; mmu-miR-669f-3p; mmu-miR-367; mmu-miR-541; mmu-miR-468; mmu-miR-381; mmu-miR-292-3p; mmu-miR-302a; mmu-miR-669a-3p; mmu-miR-466a-3p; mmu-miR-302d; mmu-miR-124; mmu-miR-136; mmu-miR-125a-5p; mmu-miR-760-5p; mmu-miR-1198-3p; mmu-mi…
L3mbtl2	1.263	11	8.70942	mmu-miR-145; mmu-miR-125a-5p; mmu-miR-760-5p; mmu-miR-193b; mmu-miR-468; mmu-miR-1224; mmu-miR-125b-5p; mmu-miR-762; mmu-miR-1935; mmu-miR-296-5p
Lactb	0.282	3	10.6383	mmu-miR-466a-3p; mmu-miR-132
Lad1	1.025	19	18.5366	mmu-miR-350; mmu-miR-148b; mmu-miR-145; mmu-miR-124; mmu-miR-130a; mmu-miR-125a-5p; mmu-miR-148a; mmu-miR-130b; mmu-miR-125b-5p; mmu-miR-762; mmu-miR-323-3p; mmu-miR-152; mmu-miR-34c; mmu-miR-34a; mmu-miR-301a; mmu-miR-182; mmu-miR-1224; mmu-miR-423-5p
Lama1	0.196	4	20.4082	mmu-miR-350; mmu-miR-202-3p; mmu-miR-421; mmu-miR-1935
Lamc2	1.274	24	18.8383	mmu-miR-466a-3p; mmu-miR-32; mmu-miR-429; mmu-miR-374; mmu-miR-200b; mmu-miR-125a-5p; mmu-miR-484; mmu-miR-363-3p; mmu-miR-369-3p; mmu-miR-125b-5p; mmu-miR-762; mmu-miR-34c; mmu-miR-205; mmu-miR-335-3p; mmu-miR-669f-3p; mmu-miR-367; mmu-miR-34a; mmu-miR-1198-5p; mmu-miR-532-5p; mmu-miR-25; mmu-miR-376b; mmu-miR-200c; mmu-miR-1952; mmu-miR-466f
Lamp2	2.205	49	22.2222	mmu-miR-467e; mmu-miR-145; mmu-miR-93; mmu-miR-431; mmu-miR-20a; mmu-miR-340-5p; mmu-miR-466b-3p; mmu-miR-323-3p; mmu-miR-434-3p; mmu-miR-155; mmu-miR-669f-3p; mmu-miR-34a; mmu-miR-467h; mmu-miR-106a; mmu-miR-103; mmu-miR-17; mmu-miR-302a; mmu-miR-302d; mmu-miR-466a-3p; mmu-miR-350; mmu-miR-20b; mmu-miR-295; mmu-miR-720; mmu-miR-291b-3p; mmu-miR-466c-3p; mmu-miR-330; mmu-miR-34c; mmu-miR-335-3p; …
Laptm4a	0.551	25	45.3721	mmu-miR-200a; mmu-miR-495; mmu-miR-350; mmu-miR-93; mmu-miR-130a; mmu-miR-760-5p; mmu-miR-19a; mmu-miR-20b; mmu-miR-130b; mmu-miR-20a; mmu-miR-467f; mmu-miR-291a-5p; mmu-miR-1196; mmu-miR-141; mmu-miR-291b-3p; mmu-miR-760-3p; mmu-miR-291b-5p; mmu-miR-106b; mmu-miR-301a; mmu-miR-183; mmu-miR-376b; mmu-miR-106a; mmu-miR-17; mmu-miR-381; mmu-miR-19b
Laptm4b	0.915	24	26.2295	mmu-miR-495; mmu-miR-350; mmu-miR-1960; mmu-miR-148b; mmu-miR-804; mmu-miR-429; mmu-miR-200b; mmu-miR-148a; mmu-miR-23b; mmu-miR-377; mmu-miR-152; mmu-miR-181a; mmu-miR-330; mmu-miR-760-3p; mmu-miR-468; mmu-miR-200c; mmu-miR-421; mmu-miR-23a; mmu-miR-292-5p
Larp6	0.744	10	13.4409	mmu-miR-145; mmu-miR-22; mmu-miR-1893; mmu-miR-136; mmu-miR-431; mmu-miR-129-2-3p; mmu-miR-129-1-3p; mmu-miR-410
Las1l	0.185	6	32.4324	mmu-miR-669f-5p; mmu-miR-669l; mmu-miR-669a-5p; mmu-miR-96; mmu-miR-741; mmu-miR-466g
Lasp1	2.519	38	15.0854	mmu-miR-669a-3p; mmu-miR-495; mmu-miR-29b; mmu-miR-124; mmu-miR-335-5p; mmu-miR-760-5p; mmu-miR-466g; mmu-miR-484; mmu-miR-150; mmu-miR-18b; mmu-miR-762; mmu-miR-291a-5p; mmu-miR-151-5p; mmu-miR-29a; mmu-miR-29c; mmu-miR-760-3p; mmu-miR-291b-5p; mmu-miR-669o-3p; mmu-miR-293; mmu-miR-378; mmu-miR-27a; mmu-miR-541; mmu-miR-1983; mmu-miR-202-3p; mmu-miR-26b; mmu-miR-33; mmu-miR-26a; mmu-miR-1935; mm…
Lbh	2.498	62	24.8199	mmu-miR-495; mmu-miR-93; mmu-miR-804; mmu-miR-335-5p; mmu-miR-19a; mmu-miR-150; mmu-miR-674; mmu-miR-20a; mmu-miR-467f; mmu-miR-466b-3p; mmu-miR-28; mmu-miR-669f-3p; mmu-let-7a; mmu-miR-27a; mmu-miR-191; mmu-miR-541; mmu-miR-468; mmu-miR-106a; mmu-miR-17; mmu-miR-202-3p; mmu-miR-421; mmu-miR-1952; mmu-miR-302a; mmu-miR-423-5p; mmu-miR-19b; mmu-let-7g; mmu-miR-195; mmu-miR-302d; mmu-miR-350; mmu-m…
Lcp1	1.504	30	19.9468	mmu-miR-29b; mmu-miR-124; mmu-miR-429; mmu-miR-335-5p; mmu-miR-96; mmu-miR-200b; mmu-miR-125a-5p; mmu-miR-760-5p; mmu-miR-431; mmu-miR-484; mmu-miR-125b-5p; mmu-miR-376c; mmu-miR-296-5p; mmu-miR-741; mmu-miR-323-3p; mmu-miR-330; mmu-miR-205; mmu-miR-29a; mmu-miR-29c; mmu-miR-335-3p; mmu-miR-543; mmu-miR-132; mmu-miR-200c; mmu-miR-421; mmu-miR-33; mmu-miR-423-5p
Lef1	1.287	21	16.317	mmu-miR-302d; mmu-miR-1198-3p; mmu-miR-295; mmu-miR-28; mmu-miR-34c; mmu-miR-335-3p; mmu-miR-134; mmu-miR-293; mmu-miR-34a; mmu-miR-27a; mmu-miR-291a-3p; mmu-miR-26b; mmu-miR-421; mmu-miR-26a; mmu-miR-1935; mmu-miR-292-5p; mmu-miR-302a; mmu-miR-294
Lefty1	0.425	22	51.7647	mmu-miR-466a-3p; mmu-miR-302d; mmu-miR-148b; mmu-miR-124; mmu-miR-148a; mmu-miR-467c; mmu-miR-150; mmu-miR-295; mmu-miR-23b; mmu-miR-291b-3p; mmu-miR-152; mmu-miR-290-3p; mmu-miR-467a; mmu-miR-541; mmu-miR-291a-3p; mmu-miR-292-3p; mmu-miR-23a; mmu-miR-302a; mmu-miR-294
Lepre1	1.602	42	26.2172	mmu-miR-29b; mmu-miR-713; mmu-miR-466g; mmu-miR-150; mmu-miR-29c; mmu-miR-205; mmu-miR-367; mmu-let-7a; mmu-miR-27a; mmu-miR-129-2-3p; mmu-miR-202-3p; mmu-miR-129-1-3p; mmu-miR-302a; mmu-miR-423-5p; mmu-let-7g; mmu-miR-302d; mmu-miR-32; mmu-miR-148b; mmu-miR-1960; mmu-miR-148a; mmu-miR-484; mmu-miR-363-3p; mmu-miR-295; mmu-miR-762; mmu-miR-376c; mmu-let-7c; mmu-miR-152; mmu-miR-127; mmu-miR-29a; …
Leprel2	1.845	28	15.1762	mmu-miR-124; mmu-miR-713; mmu-miR-335-5p; mmu-miR-125a-5p; mmu-miR-484; mmu-miR-674; mmu-miR-125b-5p; mmu-miR-762; mmu-miR-741; mmu-miR-28; mmu-miR-205; mmu-miR-290-3p; mmu-miR-760-3p; mmu-miR-134; mmu-miR-293; mmu-miR-467a; mmu-miR-378; mmu-miR-532-5p; mmu-miR-193b; mmu-miR-541; mmu-miR-103; mmu-miR-129-2-3p; mmu-miR-292-3p; mmu-miR-129-1-3p; mmu-miR-423-5p
Lgals1	0.321	7	21.8069	mmu-miR-150; mmu-miR-674; mmu-miR-22; mmu-miR-762; mmu-miR-376c; mmu-miR-296-5p; mmu-miR-27a
Lgr5	1.703	33	19.3776	mmu-miR-669a-3p; mmu-miR-1960; mmu-miR-148b; mmu-miR-669l; mmu-miR-431; mmu-miR-148a; mmu-miR-669f-5p; mmu-miR-484; mmu-miR-150; mmu-miR-741; mmu-miR-377; mmu-miR-323-3p; mmu-miR-28; mmu-miR-101b; mmu-miR-152; mmu-miR-1945; mmu-miR-330; mmu-miR-127; mmu-miR-134; mmu-miR-669o-3p; mmu-miR-669a-5p; mmu-miR-193b; mmu-miR-329; mmu-miR-421; mmu-miR-1952; mmu-miR-292-5p; mmu-miR-410
Lhfp	1.07	28	26.1682	mmu-miR-466a-3p; mmu-miR-200a; mmu-miR-429; mmu-miR-136; mmu-miR-200b; mmu-miR-484; mmu-miR-369-3p; mmu-miR-23b; mmu-miR-291a-5p; mmu-miR-323-3p; mmu-miR-101b; mmu-miR-141; mmu-miR-669f-3p; mmu-miR-543; mmu-miR-291b-5p; mmu-miR-27a; mmu-miR-129-2-3p; mmu-miR-200c; mmu-miR-672; mmu-miR-1952; mmu-miR-129-1-3p; mmu-miR-23a; mmu-miR-292-5p
Lhx1	1.265	18	14.2292	mmu-miR-466a-3p; mmu-miR-433; mmu-miR-330; mmu-miR-495; mmu-miR-205; mmu-miR-669f-3p; mmu-miR-132; mmu-miR-429; mmu-miR-27a; mmu-miR-200b; mmu-miR-760-5p; mmu-miR-200c; mmu-miR-1952; mmu-miR-23b; mmu-miR-23a
Lhx9	3.468	65	18.7428	mmu-miR-200a; mmu-miR-495; mmu-miR-467e; mmu-miR-29b; mmu-miR-804; mmu-miR-96; mmu-miR-466g; mmu-miR-467c; mmu-miR-150; mmu-miR-369-3p; mmu-miR-467f; mmu-miR-340-5p; mmu-miR-466b-3p; mmu-miR-29c; mmu-miR-155; mmu-miR-543; mmu-miR-132; mmu-miR-34a; mmu-miR-467h; mmu-miR-541; mmu-miR-182; mmu-miR-672; mmu-miR-381; mmu-miR-154; mmu-miR-302a; mmu-miR-466a-3p; mmu-miR-302d; mmu-miR-136; mmu-miR-872; m…
Lims2	0.629	7	11.1288	mmu-miR-205; mmu-miR-145; mmu-miR-672; mmu-miR-762; mmu-miR-376c; mmu-miR-296-5p
Lin7c	3.602	49	13.6036	mmu-miR-145; mmu-miR-804; mmu-miR-713; mmu-miR-466g; mmu-miR-674; mmu-miR-467f; mmu-miR-340-5p; mmu-miR-30d; mmu-miR-291a-5p; mmu-miR-323-3p; mmu-miR-30a; mmu-miR-181a; mmu-miR-155; mmu-miR-669f-3p; mmu-miR-291b-5p; mmu-miR-669o-3p; mmu-miR-27a; mmu-miR-30b; mmu-miR-421; mmu-miR-466a-3p; mmu-miR-669a-3p; mmu-miR-350; mmu-miR-136; mmu-miR-484; mmu-miR-23b; mmu-miR-101b; mmu-miR-335-3p; mmu-miR-760…
Llgl2	0.307	17	55.3746	mmu-miR-195; mmu-miR-142-3p; mmu-miR-93; mmu-miR-15a; mmu-miR-374; mmu-miR-16; mmu-miR-106b; mmu-miR-760-5p; mmu-miR-19a; mmu-miR-20b; mmu-miR-106a; mmu-miR-17; mmu-miR-20a; mmu-miR-762; mmu-miR-15b; mmu-miR-423-5p; mmu-miR-19b
Lmna	0.926	7	7.5594	mmu-miR-669o-5p; mmu-miR-468; mmu-miR-760-3p; mmu-miR-762; mmu-miR-1935; mmu-miR-28
Lmnb2	1.656	29	17.5121	mmu-miR-466a-3p; mmu-miR-195; mmu-miR-297c; mmu-miR-713; mmu-miR-429; mmu-miR-335-5p; mmu-miR-200b; mmu-miR-16; mmu-miR-1198-3p; mmu-miR-377; mmu-miR-28; mmu-miR-330; mmu-miR-760-3p; mmu-miR-669f-3p; mmu-miR-132; mmu-miR-134; mmu-miR-22; mmu-miR-15a; mmu-miR-27a; mmu-miR-183; mmu-miR-468; mmu-miR-1983; mmu-miR-1224; mmu-miR-200c; mmu-miR-297a; mmu-miR-15b; mmu-miR-466f
Lmod1	1.957	51	26.0603	mmu-miR-96; mmu-miR-150; mmu-miR-467f; mmu-miR-291a-5p; mmu-miR-28; mmu-miR-291b-5p; mmu-let-7a; mmu-miR-34a; mmu-miR-541; mmu-miR-182; mmu-miR-103; mmu-miR-129-2-3p; mmu-miR-202-3p; mmu-miR-129-1-3p; mmu-let-7g; mmu-miR-195; mmu-miR-142-3p; mmu-miR-125a-5p; mmu-miR-16; mmu-miR-1198-3p; mmu-miR-125b-5p; mmu-let-7c; mmu-miR-101b; mmu-miR-330; mmu-miR-34c; mmu-miR-335-3p; mmu-miR-134; mmu-miR-760-3…
Lnpep	2.026	50	24.6792	mmu-miR-200a; mmu-miR-145; mmu-miR-713; mmu-miR-130a; mmu-miR-200b; mmu-miR-466g; mmu-miR-130b; mmu-miR-150; mmu-miR-369-3p; mmu-miR-434-3p; mmu-miR-669o-5p; mmu-miR-669f-3p; mmu-miR-543; mmu-miR-132; mmu-miR-1983; mmu-miR-381; mmu-miR-433; mmu-miR-148b; mmu-miR-297c; mmu-miR-669l; mmu-miR-429; mmu-miR-148a; mmu-miR-669d; mmu-miR-484; mmu-miR-669f-5p; mmu-miR-141; mmu-miR-152; mmu-miR-335-3p; mmu…
Lox	3.158	100	31.6656	mmu-miR-93; mmu-miR-96; mmu-miR-19a; mmu-miR-20a; mmu-miR-466b-3p; mmu-miR-30d; mmu-miR-30a; mmu-miR-434-3p; mmu-miR-21; mmu-miR-29c; mmu-miR-669f-3p; mmu-miR-468; mmu-miR-106a; mmu-miR-129-2-3p; mmu-miR-17; mmu-miR-202-3p; mmu-miR-672; mmu-miR-381; mmu-miR-129-1-3p; mmu-miR-302a; mmu-miR-466a-3p; mmu-miR-302d; mmu-miR-195; mmu-miR-124; mmu-miR-1198-3p; mmu-miR-20b; mmu-miR-295; mmu-miR-720; mmu-…
Loxl1	1.188	13	10.9428	mmu-miR-1960; mmu-miR-22; mmu-miR-378; mmu-miR-27a; mmu-miR-760-5p; mmu-miR-431; mmu-miR-541; mmu-miR-376b; mmu-miR-150; mmu-miR-1224; mmu-miR-1935; mmu-miR-296-5p
Loxl2	2.715	26	9.57643	mmu-miR-467e; mmu-miR-350; mmu-miR-29b; mmu-miR-297c; mmu-miR-429; mmu-miR-200b; mmu-miR-466g; mmu-miR-484; mmu-miR-18b; mmu-miR-762; mmu-miR-34c; mmu-miR-29a; mmu-miR-29c; mmu-miR-760-3p; mmu-miR-34a; mmu-miR-382; mmu-miR-532-5p; mmu-miR-467h; mmu-miR-26b; mmu-miR-200c; mmu-miR-329; mmu-miR-297a; mmu-miR-26a; mmu-miR-410
Lpar1	2.078	40	19.2493	mmu-miR-200a; mmu-miR-495; mmu-miR-145; mmu-miR-96; mmu-miR-369-3p; mmu-miR-467f; mmu-miR-340-5p; mmu-miR-466b-3p; mmu-miR-434-3p; mmu-miR-669f-3p; mmu-miR-34a; mmu-miR-1198-5p; mmu-miR-182; mmu-miR-381; mmu-miR-466a-3p; mmu-miR-148b; mmu-miR-1960; mmu-miR-350; mmu-miR-760-5p; mmu-miR-148a; mmu-miR-669d; mmu-miR-376c; mmu-miR-151-5p; mmu-miR-741; mmu-miR-141; mmu-miR-466c-3p; mmu-miR-34c; mmu-miR…
Lpp	13.255	255	19.238	mmu-miR-145; mmu-miR-804; mmu-miR-713; mmu-miR-96; mmu-miR-19a; mmu-miR-20a; mmu-miR-466b-3p; mmu-miR-30d; mmu-miR-323-3p; mmu-miR-30a; mmu-miR-29c; mmu-miR-290-3p; mmu-miR-155; mmu-miR-367; mmu-miR-106a; mmu-miR-202-3p; mmu-miR-292-3p; mmu-miR-669a-3p; mmu-miR-466a-3p; mmu-miR-195; mmu-miR-433; mmu-miR-124; mmu-miR-669l; mmu-miR-136; mmu-miR-1198-3p; mmu-miR-148a; mmu-miR-669f-5p; mmu-miR-1945; …
Lrdd	2.452	56	22.8385	mmu-miR-713; mmu-miR-130a; mmu-miR-466g; mmu-miR-130b; mmu-miR-466b-3p; mmu-miR-669o-5p; mmu-miR-21; mmu-miR-367; mmu-let-7a; mmu-miR-27a; mmu-miR-202-3p; mmu-let-7g; mmu-miR-32; mmu-miR-466a-3p; mmu-miR-142-3p; mmu-miR-148b; mmu-miR-1960; mmu-miR-136; mmu-miR-125a-5p; mmu-miR-148a; mmu-miR-363-3p; mmu-miR-125b-5p; mmu-miR-762; mmu-let-7c; mmu-miR-151-5p; mmu-miR-377; mmu-miR-466c-3p; mmu-miR-152…
Lrp1	0.789	10	12.6743	mmu-miR-330; mmu-miR-760-3p; mmu-miR-125a-5p; mmu-miR-19a; mmu-miR-125b-5p; mmu-miR-33; mmu-miR-340-5p; mmu-miR-19b; mmu-miR-423-5p
Lrp2	1.305	34	26.0536	mmu-miR-467e; mmu-miR-713; mmu-miR-466g; mmu-miR-19a; mmu-miR-674; mmu-miR-323-3p; mmu-miR-181a; mmu-miR-543; mmu-miR-367; mmu-let-7a; mmu-miR-467h; mmu-miR-129-2-3p; mmu-miR-202-3p; mmu-miR-421; mmu-miR-129-1-3p; mmu-miR-19b; mmu-let-7g; mmu-miR-32; mmu-miR-297c; mmu-miR-669d; mmu-miR-363-3p; mmu-let-7c; mmu-miR-330; mmu-miR-335-3p; mmu-miR-134; mmu-miR-760-3p; mmu-miR-183; mmu-miR-25; mmu-let-7…
Lrrc15	3.478	68	19.5515	mmu-miR-200a; mmu-miR-145; mmu-miR-804; mmu-miR-713; mmu-miR-96; mmu-miR-466g; mmu-miR-19a; mmu-miR-150; mmu-miR-674; mmu-miR-28; mmu-miR-205; mmu-let-7a; mmu-miR-669o-3p; mmu-miR-34a; mmu-miR-541; mmu-miR-182; mmu-miR-103; mmu-miR-381; mmu-miR-423-5p; mmu-miR-19b; mmu-miR-669a-3p; mmu-let-7g; mmu-miR-142-3p; mmu-miR-124; mmu-miR-148b; mmu-miR-1960; mmu-miR-136; mmu-miR-125a-5p; mmu-miR-1198-3p; …
Lrrc34	0.432	15	34.7222	mmu-miR-181a; mmu-miR-350; mmu-miR-335-3p; mmu-miR-291b-5p; mmu-miR-466g; mmu-miR-183; mmu-miR-376c; mmu-miR-1935; mmu-miR-291a-5p; mmu-miR-741; mmu-miR-323-3p
Lrrc8b	3.999	83	20.7552	mmu-miR-495; mmu-miR-467e; mmu-miR-145; mmu-miR-335-5p; mmu-miR-200b; mmu-miR-466g; mmu-miR-674; mmu-miR-340-5p; mmu-miR-466b-3p; mmu-miR-291a-5p; mmu-miR-205; mmu-miR-669f-3p; mmu-miR-367; mmu-miR-291b-5p; mmu-let-7a; mmu-miR-1198-5p; mmu-miR-467h; mmu-miR-541; mmu-miR-103; mmu-miR-421; mmu-miR-381; mmu-miR-154; mmu-miR-423-5p; mmu-miR-466a-3p; mmu-let-7g; mmu-miR-32; mmu-miR-433; mmu-miR-350; m…
Lrrn4	1.395	18	12.9032	mmu-miR-466a-3p; mmu-miR-669o-5p; mmu-miR-495; mmu-miR-1960; mmu-miR-543; mmu-miR-291b-5p; mmu-miR-382; mmu-miR-125a-5p; mmu-miR-760-5p; mmu-miR-193b; mmu-miR-484; mmu-miR-125b-5p; mmu-miR-421; mmu-miR-291a-5p; mmu-miR-377
Lsm12	1.578	17	10.7731	mmu-miR-495; mmu-miR-297c; mmu-miR-134; mmu-miR-132; mmu-miR-713; mmu-miR-378; mmu-miR-27a; mmu-miR-1198-5p; mmu-miR-183; mmu-miR-150; mmu-miR-674; mmu-miR-1952; mmu-miR-297a; mmu-miR-1935
Lss	2.411	44	18.2497	mmu-miR-200a; mmu-miR-93; mmu-miR-674; mmu-miR-20a; mmu-miR-28; mmu-miR-290-3p; mmu-miR-467a; mmu-miR-1983; mmu-miR-106a; mmu-miR-103; mmu-miR-129-2-3p; mmu-miR-17; mmu-miR-672; mmu-miR-292-3p; mmu-miR-129-1-3p; mmu-miR-124; mmu-miR-148b; mmu-miR-1960; mmu-miR-350; mmu-miR-125a-5p; mmu-miR-760-5p; mmu-miR-148a; mmu-miR-20b; mmu-miR-484; mmu-miR-125b-5p; mmu-miR-23b; mmu-miR-762; mmu-miR-141; mmu-…
Ltbp1	1.214	21	17.2982	mmu-miR-466a-3p; mmu-miR-148b; mmu-miR-804; mmu-miR-136; mmu-miR-872; mmu-miR-374; mmu-miR-466g; mmu-miR-148a; mmu-miR-369-3p; mmu-miR-466b-3p; mmu-miR-291a-5p; mmu-miR-466c-3p; mmu-miR-152; mmu-miR-669f-3p; mmu-miR-132; mmu-miR-291b-5p; mmu-miR-382; mmu-miR-26b; mmu-miR-154; mmu-miR-26a
Luc7l2	2.892	36	12.4481	mmu-miR-142-3p; mmu-miR-495; mmu-miR-713; mmu-miR-335-5p; mmu-miR-96; mmu-miR-136; mmu-miR-374; mmu-miR-125a-5p; mmu-miR-150; mmu-miR-674; mmu-miR-467f; mmu-miR-18b; mmu-miR-125b-5p; mmu-miR-376c; mmu-miR-434-3p; mmu-miR-1196; mmu-miR-291b-3p; mmu-miR-669o-5p; mmu-miR-669f-3p; mmu-miR-543; mmu-miR-134; mmu-miR-27a; mmu-miR-183; mmu-miR-193b; mmu-miR-182; mmu-miR-1224; mmu-miR-329; mmu-miR-381; mm…
Ly6g6c	0.516	6	11.6279	mmu-let-7g; mmu-miR-484; mmu-let-7e; mmu-miR-1224; mmu-let-7a; mmu-let-7c
Ly6g6e	0.519	11	21.1946	mmu-miR-335-3p; mmu-miR-134; mmu-miR-129-2-3p; mmu-miR-1952; mmu-miR-381; mmu-miR-467f; mmu-miR-672; mmu-miR-129-1-3p
Ly96	0.074	2	27.027	mmu-miR-466a-3p; mmu-miR-669f-3p
Lyar	0.619	11	17.7706	mmu-miR-335-3p; mmu-miR-145; mmu-miR-291b-5p; mmu-miR-713; mmu-miR-760-5p; mmu-miR-431; mmu-miR-103; mmu-miR-484; mmu-miR-720; mmu-miR-296-5p; mmu-miR-291a-5p
Lynx1	3.379	84	24.8594	mmu-miR-200a; mmu-miR-29b; mmu-miR-804; mmu-miR-713; mmu-miR-130a; mmu-miR-19a; mmu-miR-130b; mmu-miR-150; mmu-miR-674; mmu-miR-296-5p; mmu-miR-28; mmu-miR-181a; mmu-miR-29c; mmu-miR-205; mmu-miR-155; mmu-miR-669f-3p; mmu-miR-34a; mmu-miR-468; mmu-miR-1983; mmu-miR-129-2-3p; mmu-miR-1952; mmu-miR-129-1-3p; mmu-miR-423-5p; mmu-miR-19b; mmu-miR-195; mmu-miR-350; mmu-miR-148b; mmu-miR-1960; mmu-miR-…
Lypd6b	1.256	35	27.8662	mmu-miR-302d; mmu-miR-200a; mmu-miR-495; mmu-miR-467e; mmu-miR-1960; mmu-miR-148b; mmu-miR-130a; mmu-miR-148a; mmu-miR-467c; mmu-miR-130b; mmu-miR-150; mmu-miR-295; mmu-miR-141; mmu-miR-291b-3p; mmu-miR-330; mmu-miR-152; mmu-miR-290-3p; mmu-miR-760-3p; mmu-miR-467a; mmu-miR-378; mmu-miR-27a; mmu-miR-301a; mmu-miR-467h; mmu-miR-103; mmu-miR-291a-3p; mmu-miR-26b; mmu-miR-292-3p; mmu-miR-26a; mmu-mi…
Lypla1	1.723	47	27.278	mmu-miR-200a; mmu-miR-467e; mmu-miR-29b; mmu-miR-200b; mmu-miR-466g; mmu-miR-150; mmu-miR-369-3p; mmu-miR-340-5p; mmu-miR-466b-3p; mmu-miR-30d; mmu-miR-291a-5p; mmu-miR-323-3p; mmu-miR-30a; mmu-miR-434-3p; mmu-miR-29c; mmu-miR-132; mmu-miR-291b-5p; mmu-miR-669o-3p; mmu-miR-27a; mmu-miR-30b; mmu-miR-467h; mmu-miR-541; mmu-miR-669a-3p; mmu-miR-297c; mmu-miR-429; mmu-miR-374; mmu-miR-18b; mmu-miR-23…
Lztfl1	3.589	78	21.7331	mmu-miR-495; mmu-miR-713; mmu-miR-335-5p; mmu-miR-200b; mmu-miR-467c; mmu-miR-369-3p; mmu-miR-340-5p; mmu-miR-30d; mmu-miR-291a-5p; mmu-miR-323-3p; mmu-miR-30a; mmu-miR-434-3p; mmu-miR-21; mmu-miR-290-3p; mmu-miR-155; mmu-miR-291b-5p; mmu-miR-126-3p; mmu-miR-467a; mmu-miR-27a; mmu-miR-30b; mmu-miR-1198-5p; mmu-miR-103; mmu-miR-1983; mmu-miR-421; mmu-miR-381; mmu-miR-292-3p; mmu-miR-1952; mmu-miR-…
Mad2l1	1.048	17	16.2214	mmu-miR-495; mmu-miR-145; mmu-miR-127; mmu-miR-669f-3p; mmu-miR-543; mmu-miR-382; mmu-miR-1198-5p; mmu-miR-760-5p; mmu-miR-466g; mmu-miR-103; mmu-miR-182; mmu-miR-142-5p; mmu-miR-340-5p; mmu-miR-381; mmu-miR-410
Mageh1	0.516	25	48.4496	mmu-miR-200a; mmu-miR-142-3p; mmu-miR-1960; mmu-miR-669l; mmu-miR-93; mmu-miR-804; mmu-miR-466g; mmu-miR-431; mmu-miR-669d; mmu-miR-19a; mmu-miR-669f-5p; mmu-miR-20b; mmu-miR-674; mmu-miR-20a; mmu-miR-30d; mmu-miR-30a; mmu-miR-141; mmu-miR-669f-3p; mmu-miR-669a-5p; mmu-miR-106b; mmu-miR-30b; mmu-miR-106a; mmu-miR-17; mmu-miR-1224; mmu-miR-19b
Mal2	2.104	56	26.616	mmu-miR-200a; mmu-miR-495; mmu-miR-145; mmu-miR-804; mmu-miR-713; mmu-miR-466g; mmu-miR-674; mmu-miR-369-3p; mmu-miR-340-5p; mmu-miR-466b-3p; mmu-miR-291a-5p; mmu-miR-669f-3p; mmu-miR-291b-5p; mmu-miR-669o-3p; mmu-miR-27a; mmu-miR-26b; mmu-miR-672; mmu-miR-381; mmu-miR-154; mmu-miR-302a; mmu-miR-669a-3p; mmu-miR-302d; mmu-miR-466a-3p; mmu-miR-433; mmu-miR-136; mmu-miR-669d; mmu-miR-295; mmu-miR-3…
Man1a	2.649	56	21.1401	mmu-miR-29b; mmu-miR-150; mmu-miR-369-3p; mmu-miR-467f; mmu-miR-466b-3p; mmu-miR-181a; mmu-miR-21; mmu-miR-29c; mmu-miR-367; mmu-miR-132; mmu-miR-1198-5p; mmu-miR-191; mmu-miR-541; mmu-miR-468; mmu-miR-103; mmu-miR-182; mmu-miR-1983; mmu-miR-26b; mmu-miR-421; mmu-miR-154; mmu-miR-466a-3p; mmu-miR-32; mmu-miR-297c; mmu-miR-350; mmu-miR-872; mmu-miR-374; mmu-miR-760-5p; mmu-miR-669d; mmu-miR-363-3p…
Map4k5	1.514	37	24.4386	mmu-miR-467e; mmu-miR-804; mmu-miR-200b; mmu-miR-369-3p; mmu-miR-291a-5p; mmu-miR-323-3p; mmu-miR-155; mmu-miR-291b-5p; mmu-let-7a; mmu-miR-1198-5p; mmu-miR-467h; mmu-miR-541; mmu-miR-202-3p; mmu-let-7g; mmu-miR-466a-3p; mmu-miR-142-3p; mmu-miR-433; mmu-miR-148b; mmu-miR-1960; mmu-miR-297c; mmu-miR-429; mmu-miR-374; mmu-miR-148a; mmu-miR-18b; mmu-miR-23b; mmu-miR-376c; mmu-let-7c; mmu-miR-152; mm…
Mapk14	2.066	46	22.2652	mmu-miR-200a; mmu-miR-93; mmu-miR-713; mmu-miR-335-5p; mmu-miR-19a; mmu-miR-674; mmu-miR-20a; mmu-miR-340-5p; mmu-miR-28; mmu-miR-434-3p; mmu-miR-27a; mmu-miR-106a; mmu-miR-103; mmu-miR-17; mmu-miR-421; mmu-miR-302a; mmu-miR-19b; mmu-miR-302d; mmu-miR-124; mmu-miR-350; mmu-miR-125a-5p; mmu-miR-20b; mmu-miR-295; mmu-miR-125b-5p; mmu-miR-151-5p; mmu-miR-377; mmu-miR-141; mmu-miR-335-3p; mmu-miR-22;…
Mapk6	1.15	44	38.2609	mmu-miR-495; mmu-miR-93; mmu-miR-804; mmu-miR-96; mmu-miR-20a; mmu-miR-467f; mmu-miR-340-5p; mmu-miR-434-3p; mmu-miR-1198-5p; mmu-miR-106a; mmu-miR-182; mmu-miR-17; mmu-miR-26b; mmu-miR-154; mmu-miR-302a; mmu-miR-195; mmu-miR-302d; mmu-miR-466a-3p; mmu-miR-433; mmu-miR-148b; mmu-miR-297c; mmu-miR-669l; mmu-miR-872; mmu-miR-16; mmu-miR-148a; mmu-miR-669d; mmu-miR-669f-5p; mmu-miR-20b; mmu-miR-295;…
Mapk8ip2	2.757	51	18.4984	mmu-miR-200a; mmu-miR-495; mmu-miR-145; mmu-miR-804; mmu-miR-335-5p; mmu-miR-96; mmu-miR-130a; mmu-miR-130b; mmu-miR-150; mmu-miR-340-5p; mmu-miR-296-5p; mmu-miR-291a-5p; mmu-miR-205; mmu-miR-155; mmu-miR-291b-5p; mmu-let-7a; mmu-miR-103; mmu-miR-672; mmu-miR-421; mmu-let-7g; mmu-miR-195; mmu-miR-148b; mmu-miR-125a-5p; mmu-miR-16; mmu-miR-760-5p; mmu-miR-148a; mmu-miR-484; mmu-miR-125b-5p; mmu-mi…
Marcks	2.733	61	22.3198	mmu-miR-200a; mmu-miR-495; mmu-miR-145; mmu-miR-93; mmu-miR-200b; mmu-miR-20a; mmu-miR-30d; mmu-miR-30a; mmu-miR-28; mmu-miR-434-3p; mmu-miR-669o-5p; mmu-miR-205; mmu-miR-543; mmu-miR-669o-3p; mmu-miR-30b; mmu-miR-541; mmu-miR-106a; mmu-miR-17; mmu-miR-672; mmu-miR-1952; mmu-miR-669a-3p; mmu-miR-195; mmu-miR-148b; mmu-miR-669l; mmu-miR-429; mmu-miR-374; mmu-miR-125a-5p; mmu-miR-16; mmu-miR-148a; …
Mars	0.073	2	27.3973	mmu-miR-19a; mmu-miR-19b
Marveld2	1.332	21	15.7658	mmu-miR-195; mmu-miR-200a; mmu-miR-142-3p; mmu-miR-467e; mmu-miR-145; mmu-miR-872; mmu-miR-16; mmu-miR-466b-3p; mmu-miR-296-5p; mmu-miR-466c-3p; mmu-miR-141; mmu-miR-155; mmu-miR-134; mmu-miR-15a; mmu-miR-467h; mmu-miR-154; mmu-miR-1935; mmu-miR-15b; mmu-miR-292-5p; mmu-miR-466f; mmu-miR-423-5p
Marveld3	1.22	18	14.7541	mmu-miR-141; mmu-miR-433; mmu-miR-200a; mmu-miR-1945; mmu-miR-350; mmu-miR-297c; mmu-miR-291b-5p; mmu-miR-193b; mmu-miR-468; mmu-miR-674; mmu-miR-421; mmu-miR-1952; mmu-miR-1935; mmu-miR-297a; mmu-miR-291a-5p
Mbnl1	3.395	89	26.215	mmu-miR-495; mmu-miR-335-5p; mmu-miR-96; mmu-miR-466g; mmu-miR-431; mmu-miR-467c; mmu-miR-19a; mmu-miR-466b-3p; mmu-miR-30d; mmu-miR-30a; mmu-miR-434-3p; mmu-miR-21; mmu-miR-290-3p; mmu-miR-155; mmu-miR-669f-3p; mmu-miR-541; mmu-miR-468; mmu-miR-381; mmu-miR-292-3p; mmu-miR-154; mmu-miR-302a; mmu-miR-466a-3p; mmu-miR-302d; mmu-miR-433; mmu-miR-669l; mmu-miR-760-5p; mmu-miR-669f-5p; mmu-miR-295; m…
Mbtps1	0.623	16	25.6822	mmu-let-7g; mmu-miR-148b; mmu-miR-124; mmu-miR-148a; mmu-let-7c; mmu-miR-434-3p; mmu-miR-152; mmu-miR-290-3p; mmu-let-7a; mmu-miR-760-3p; mmu-miR-1893; mmu-miR-467a; mmu-let-7e; mmu-miR-202-3p; mmu-miR-292-3p; mmu-miR-1935
Mchr1	0.851	9	10.5758	mmu-miR-22; mmu-miR-27a; mmu-miR-466g; mmu-miR-129-2-3p; mmu-miR-1952; mmu-miR-129-1-3p; mmu-miR-296-5p; mmu-miR-741
Mcm10	1.679	17	10.1251	mmu-miR-302d; mmu-miR-330; mmu-miR-205; mmu-miR-760-3p; mmu-miR-134; mmu-miR-1198-5p; mmu-miR-466g; mmu-miR-1198-3p; mmu-miR-291a-3p; mmu-miR-295; mmu-miR-142-5p; mmu-miR-1952; mmu-miR-762; mmu-miR-302a; mmu-miR-294
Mcm2	0.525	17	32.381	mmu-miR-669o-5p; mmu-miR-205; mmu-miR-155; mmu-miR-669l; mmu-miR-543; mmu-miR-291b-5p; mmu-miR-669a-5p; mmu-miR-96; mmu-miR-378; mmu-miR-423-3p; mmu-miR-669f-5p; mmu-miR-182; mmu-miR-291a-5p; mmu-miR-292-5p
Mcm3	0.488	7	14.3443	mmu-miR-669d; mmu-miR-468; mmu-miR-433; mmu-miR-181a; mmu-miR-150; mmu-miR-335-5p; mmu-miR-410
Mcm5	1.115	31	27.8027	mmu-miR-669a-3p; mmu-miR-195; mmu-miR-495; mmu-miR-297c; mmu-miR-713; mmu-miR-16; mmu-miR-466g; mmu-miR-484; mmu-miR-674; mmu-miR-340-5p; mmu-miR-466b-3p; mmu-miR-377; mmu-miR-101b; mmu-miR-466c-3p; mmu-miR-181a; mmu-miR-34c; mmu-miR-669f-3p; mmu-miR-134; mmu-miR-669o-3p; mmu-miR-34a; mmu-miR-15a; mmu-miR-103; mmu-miR-297a; mmu-miR-292-5p; mmu-miR-15b
Mcm9	0.995	33	33.1658	mmu-miR-302d; mmu-miR-200a; mmu-miR-350; mmu-miR-125a-5p; mmu-miR-466g; mmu-miR-467c; mmu-miR-295; mmu-miR-340-5p; mmu-miR-125b-5p; mmu-miR-762; mmu-miR-466b-3p; mmu-miR-323-3p; mmu-miR-466c-3p; mmu-miR-141; mmu-miR-291b-3p; mmu-miR-21; mmu-miR-155; mmu-miR-290-3p; mmu-miR-543; mmu-miR-467a; mmu-miR-27a; mmu-miR-193b; mmu-miR-129-2-3p; mmu-miR-291a-3p; mmu-miR-381; mmu-miR-33; mmu-miR-292-3p; mmu…
Mdfi	0.58	11	18.9655	mmu-miR-669d; mmu-miR-141; mmu-miR-200a; mmu-miR-1224; mmu-miR-22; mmu-miR-760-5p; mmu-miR-423-5p
Mdfic	2.304	86	37.3264	mmu-miR-145; mmu-miR-93; mmu-miR-713; mmu-miR-335-5p; mmu-miR-466g; mmu-miR-467c; mmu-miR-19a; mmu-miR-20a; mmu-miR-466b-3p; mmu-miR-30d; mmu-miR-323-3p; mmu-miR-30a; mmu-miR-155; mmu-miR-669f-3p; mmu-miR-367; mmu-miR-106a; mmu-miR-17; mmu-miR-381; mmu-miR-466a-3p; mmu-miR-433; mmu-miR-124; mmu-miR-148b; mmu-miR-669l; mmu-miR-148a; mmu-miR-669f-5p; mmu-miR-20b; mmu-miR-23b; mmu-miR-377; mmu-miR-4…
Mdk	0.285	5	17.5439	mmu-miR-290-3p; mmu-miR-150; mmu-miR-292-3p; mmu-miR-467a; mmu-miR-410
Me1	1.366	20	14.6413	mmu-miR-433; mmu-miR-495; mmu-miR-297c; mmu-miR-466g; mmu-miR-669d; mmu-miR-484; mmu-miR-674; mmu-miR-18b; mmu-miR-377; mmu-miR-101b; mmu-miR-669o-5p; mmu-miR-34c; mmu-miR-155; mmu-miR-335-3p; mmu-miR-543; mmu-miR-134; mmu-miR-34a; mmu-miR-1983; mmu-miR-376b; mmu-miR-297a
Med14	2.209	40	18.1077	mmu-miR-467e; mmu-miR-29b; mmu-miR-145; mmu-miR-200b; mmu-miR-431; mmu-miR-467f; mmu-miR-291a-5p; mmu-miR-21; mmu-miR-29c; mmu-miR-205; mmu-miR-669f-3p; mmu-miR-543; mmu-miR-291b-5p; mmu-miR-27a; mmu-miR-1198-5p; mmu-miR-467h; mmu-miR-26b; mmu-miR-381; mmu-miR-466a-3p; mmu-miR-148b; mmu-miR-297c; mmu-miR-429; mmu-miR-148a; mmu-miR-669d; mmu-miR-18b; mmu-miR-101b; mmu-miR-1196; mmu-miR-152; mmu-mi…
Mef2a	3.705	71	19.1633	mmu-miR-200a; mmu-miR-495; mmu-miR-467e; mmu-miR-713; mmu-miR-200b; mmu-miR-19a; mmu-miR-150; mmu-miR-674; mmu-miR-467f; mmu-miR-30d; mmu-miR-296-5p; mmu-miR-291a-5p; mmu-miR-30a; mmu-miR-434-3p; mmu-miR-181a; mmu-miR-205; mmu-miR-367; mmu-miR-291b-5p; mmu-miR-30b; mmu-miR-1198-5p; mmu-miR-467h; mmu-miR-672; mmu-miR-421; mmu-miR-381; mmu-miR-19b; mmu-miR-466a-3p; mmu-miR-32; mmu-miR-433; mmu-miR-…
Meis2	1.486	23	15.4778	mmu-miR-495; mmu-miR-350; mmu-miR-297c; mmu-miR-429; mmu-miR-200b; mmu-miR-431; mmu-miR-323-3p; mmu-miR-181a; mmu-miR-335-3p; mmu-miR-382; mmu-miR-1198-5p; mmu-miR-468; mmu-miR-26b; mmu-miR-200c; mmu-miR-1224; mmu-miR-154; mmu-miR-26a; mmu-miR-297a
Mesp1	0.282	3	10.6383	mmu-miR-34c; mmu-miR-34a; mmu-miR-96
Mex3a	4.215	84	19.9288	mmu-miR-495; mmu-miR-713; mmu-miR-200b; mmu-miR-466g; mmu-miR-19a; mmu-miR-150; mmu-miR-674; mmu-miR-369-3p; mmu-miR-467f; mmu-miR-296-5p; mmu-miR-291a-5p; mmu-miR-323-3p; mmu-miR-434-3p; mmu-miR-669o-5p; mmu-miR-181a; mmu-miR-669f-3p; mmu-miR-291b-5p; mmu-let-7a; mmu-miR-132; mmu-miR-27a; mmu-miR-129-2-3p; mmu-miR-202-3p; mmu-miR-381; mmu-miR-1952; mmu-miR-129-1-3p; mmu-miR-302a; mmu-miR-423-5p;…
Mfsd7c	1.466	46	31.3779	mmu-miR-200a; mmu-miR-29b; mmu-miR-713; mmu-miR-130a; mmu-miR-130b; mmu-miR-150; mmu-miR-30d; mmu-miR-30a; mmu-miR-434-3p; mmu-miR-29c; mmu-miR-367; mmu-miR-132; mmu-miR-34a; mmu-miR-27a; mmu-miR-30b; mmu-miR-1198-5p; mmu-miR-672; mmu-miR-421; mmu-miR-1952; mmu-miR-302a; mmu-miR-302d; mmu-miR-32; mmu-miR-124; mmu-miR-148b; mmu-miR-760-5p; mmu-miR-148a; mmu-miR-363-3p; mmu-miR-295; mmu-miR-720; mm…
Mgll	2.584	75	29.0248	mmu-miR-93; mmu-miR-130a; mmu-miR-130b; mmu-miR-20a; mmu-miR-466b-3p; mmu-miR-296-5p; mmu-miR-323-3p; mmu-miR-28; mmu-miR-669o-5p; mmu-miR-290-3p; mmu-miR-205; mmu-miR-367; mmu-let-7a; mmu-miR-467a; mmu-miR-106a; mmu-miR-17; mmu-miR-202-3p; mmu-miR-292-3p; mmu-miR-1952; mmu-miR-302a; mmu-miR-423-5p; mmu-miR-466a-3p; mmu-miR-32; mmu-miR-302d; mmu-let-7g; mmu-miR-142-3p; mmu-miR-350; mmu-miR-1960; …
Mical2	3.471	88	25.3529	mmu-miR-200a; mmu-miR-495; mmu-miR-29b; mmu-miR-145; mmu-miR-713; mmu-miR-335-5p; mmu-miR-466g; mmu-miR-431; mmu-miR-467c; mmu-miR-674; mmu-miR-340-5p; mmu-miR-466b-3p; mmu-miR-30d; mmu-miR-30a; mmu-miR-29c; mmu-miR-290-3p; mmu-miR-205; mmu-miR-669f-3p; mmu-miR-1893; mmu-miR-467a; mmu-miR-27a; mmu-miR-30b; mmu-miR-468; mmu-miR-1983; mmu-miR-421; mmu-miR-381; mmu-miR-292-3p; mmu-miR-423-5p; mmu-mi…
Mink1	0.771	23	29.8314	mmu-miR-302d; mmu-miR-195; mmu-miR-495; mmu-miR-124; mmu-miR-93; mmu-miR-136; mmu-miR-16; mmu-miR-19a; mmu-miR-484; mmu-miR-20b; mmu-miR-295; mmu-miR-20a; mmu-miR-181a; mmu-miR-669f-3p; mmu-miR-15a; mmu-miR-106b; mmu-miR-106a; mmu-miR-17; mmu-miR-291a-3p; mmu-miR-302a; mmu-miR-15b; mmu-miR-19b; mmu-miR-294
Mkrn1	1.421	29	20.4082	mmu-miR-669l; mmu-miR-713; mmu-miR-125a-5p; mmu-miR-19a; mmu-miR-669f-5p; mmu-miR-150; mmu-miR-125b-5p; mmu-miR-669o-5p; mmu-miR-34c; mmu-miR-205; mmu-miR-760-3p; mmu-miR-669a-5p; mmu-miR-1893; mmu-miR-22; mmu-miR-34a; mmu-miR-382; mmu-miR-1198-5p; mmu-miR-1983; mmu-miR-202-3p; mmu-miR-672; mmu-miR-33; mmu-miR-292-5p; mmu-miR-19b; mmu-miR-423-5p
Mlec	4.934	94	19.0515	mmu-miR-495; mmu-miR-804; mmu-miR-713; mmu-miR-335-5p; mmu-miR-431; mmu-miR-340-5p; mmu-miR-30d; mmu-miR-30a; mmu-miR-28; mmu-miR-434-3p; mmu-miR-669f-3p; mmu-let-7a; mmu-miR-541; mmu-miR-129-2-3p; mmu-miR-202-3p; mmu-miR-672; mmu-miR-381; mmu-miR-154; mmu-miR-129-1-3p; mmu-let-7g; mmu-miR-195; mmu-miR-136; mmu-miR-125a-5p; mmu-miR-760-5p; mmu-miR-125b-5p; mmu-miR-330; mmu-miR-1945; mmu-miR-335-3…
Mlf1ip	2.782	29	10.4242	mmu-miR-466a-3p; mmu-miR-200a; mmu-miR-467e; mmu-miR-713; mmu-miR-335-5p; mmu-miR-466g; mmu-miR-674; mmu-miR-369-3p; mmu-miR-467f; mmu-miR-1196; mmu-miR-141; mmu-miR-669o-5p; mmu-miR-21; mmu-miR-205; mmu-miR-669f-3p; mmu-miR-378; mmu-miR-532-5p; mmu-miR-467h; mmu-miR-182; mmu-miR-329; mmu-miR-33; mmu-miR-381; mmu-miR-292-5p
Mlkl	0.228	6	26.3158	mmu-miR-195; mmu-miR-103; mmu-miR-205; mmu-miR-15a; mmu-miR-16; mmu-miR-15b
Mllt1	1.85	43	23.2432	mmu-miR-93; mmu-miR-130a; mmu-miR-19a; mmu-miR-130b; mmu-miR-150; mmu-miR-674; mmu-miR-20a; mmu-miR-434-3p; mmu-miR-27a; mmu-miR-1198-5p; mmu-miR-106a; mmu-miR-129-2-3p; mmu-miR-17; mmu-miR-129-1-3p; mmu-miR-423-5p; mmu-miR-19b; mmu-miR-195; mmu-miR-433; mmu-miR-350; mmu-miR-136; mmu-miR-16; mmu-miR-760-5p; mmu-miR-20b; mmu-miR-762; mmu-miR-377; mmu-miR-330; mmu-miR-335-3p; mmu-miR-15a; mmu-miR-3…
Mme	5.698	147	25.7985	mmu-miR-495; mmu-miR-93; mmu-miR-335-5p; mmu-miR-96; mmu-miR-466g; mmu-miR-431; mmu-miR-20a; mmu-miR-340-5p; mmu-miR-466b-3p; mmu-miR-30d; mmu-miR-323-3p; mmu-miR-30a; mmu-miR-28; mmu-miR-434-3p; mmu-miR-21; mmu-miR-155; mmu-miR-669f-3p; mmu-miR-468; mmu-miR-106a; mmu-miR-17; mmu-miR-381; mmu-miR-302a; mmu-miR-466a-3p; mmu-miR-302d; mmu-miR-433; mmu-miR-124; mmu-miR-1198-3p; mmu-miR-20b; mmu-miR-…
Mmp17	4.561	72	15.786	mmu-miR-200a; mmu-miR-29b; mmu-miR-145; mmu-miR-804; mmu-miR-335-5p; mmu-miR-96; mmu-miR-467c; mmu-miR-150; mmu-miR-674; mmu-miR-296-5p; mmu-miR-28; mmu-miR-29c; mmu-miR-290-3p; mmu-miR-205; mmu-miR-543; mmu-miR-34a; mmu-miR-467a; mmu-miR-27a; mmu-miR-1198-5p; mmu-miR-182; mmu-miR-103; mmu-miR-129-2-3p; mmu-miR-26b; mmu-miR-672; mmu-miR-421; mmu-miR-292-3p; mmu-miR-129-1-3p; mmu-miR-302a; mmu-miR…
Mmp25	1.11	20	18.018	mmu-let-7g; mmu-miR-136; mmu-miR-760-5p; mmu-miR-674; mmu-let-7c; mmu-miR-741; mmu-miR-434-3p; mmu-miR-205; mmu-let-7a; mmu-miR-134; mmu-miR-27a; mmu-let-7e; mmu-miR-376b; mmu-miR-202-3p; mmu-miR-154; mmu-miR-292-5p; mmu-miR-410; mmu-miR-423-5p
Mnd1	0.135	2	14.8148	mmu-miR-381; mmu-miR-142-5p
Mphosph10	0.079	2	25.3165	mmu-miR-369-3p; mmu-miR-374
Mprip	5.372	112	20.8488	mmu-miR-495; mmu-miR-804; mmu-miR-713; mmu-miR-19a; mmu-miR-466b-3p; mmu-miR-28; mmu-miR-434-3p; mmu-miR-21; mmu-miR-155; mmu-miR-669f-3p; mmu-miR-129-2-3p; mmu-miR-129-1-3p; mmu-miR-195; mmu-miR-148b; mmu-miR-136; mmu-miR-125a-5p; mmu-miR-760-5p; mmu-miR-148a; mmu-miR-125b-5p; mmu-miR-377; mmu-miR-466c-3p; mmu-miR-34c; mmu-miR-330; mmu-miR-152; mmu-miR-134; mmu-miR-22; mmu-miR-15a; mmu-miR-532-5…
Mpst	0.325	8	24.6154	mmu-miR-330; mmu-miR-182; mmu-miR-29c; mmu-miR-29b; mmu-miR-29a; mmu-miR-713; mmu-miR-296-5p; mmu-miR-760-5p
Mpzl2	2.147	25	11.6442	mmu-miR-32; mmu-miR-350; mmu-miR-145; mmu-miR-804; mmu-miR-669d; mmu-miR-363-3p; mmu-miR-467f; mmu-miR-18b; mmu-miR-291a-5p; mmu-miR-741; mmu-miR-377; mmu-miR-101b; mmu-miR-669f-3p; mmu-miR-134; mmu-miR-291b-5p; mmu-miR-367; mmu-miR-22; mmu-miR-25; mmu-miR-468; mmu-miR-329; mmu-miR-1935
Mras	2.985	87	29.1457	mmu-miR-495; mmu-miR-29b; mmu-miR-93; mmu-miR-713; mmu-miR-96; mmu-miR-200b; mmu-miR-431; mmu-miR-150; mmu-miR-674; mmu-miR-20a; mmu-miR-28; mmu-miR-29c; mmu-let-7a; mmu-miR-34a; mmu-miR-468; mmu-miR-182; mmu-miR-106a; mmu-miR-17; mmu-miR-129-2-3p; mmu-miR-202-3p; mmu-miR-421; mmu-miR-129-1-3p; mmu-miR-302a; mmu-miR-423-5p; mmu-miR-302d; mmu-let-7g; mmu-miR-195; mmu-miR-148b; mmu-miR-1960; mmu-mi…
Mrc2	1.214	19	15.6507	mmu-miR-29c; mmu-miR-29b; mmu-miR-29a; mmu-miR-145; mmu-miR-124; mmu-miR-804; mmu-miR-713; mmu-miR-136; mmu-miR-872; mmu-miR-150; mmu-miR-18b; mmu-miR-1952; mmu-miR-23b; mmu-miR-762; mmu-miR-296-5p; mmu-miR-23a
Mrpl15	3.253	32	9.83707	mmu-miR-195; mmu-miR-350; mmu-miR-29b; mmu-miR-804; mmu-miR-96; mmu-miR-16; mmu-miR-669d; mmu-miR-340-5p; mmu-miR-466b-3p; mmu-miR-376c; mmu-miR-296-5p; mmu-miR-741; mmu-miR-28; mmu-miR-466c-3p; mmu-miR-669o-5p; mmu-miR-29a; mmu-miR-29c; mmu-miR-335-3p; mmu-miR-376a; mmu-miR-15a; mmu-miR-103; mmu-miR-129-2-3p; mmu-miR-672; mmu-miR-1935; mmu-miR-129-1-3p; mmu-miR-15b
Msh2	0.305	12	39.3443	mmu-miR-291b-3p; mmu-miR-335-3p; mmu-miR-760-3p; mmu-miR-93; mmu-miR-106b; mmu-miR-468; mmu-miR-106a; mmu-miR-20b; mmu-miR-17; mmu-miR-20a; mmu-miR-421; mmu-miR-33
Msh6	0.078	2	25.641	mmu-miR-335-3p; mmu-miR-142-5p
Msn	1.918	44	22.9406	mmu-miR-467e; mmu-miR-713; mmu-miR-335-5p; mmu-miR-96; mmu-miR-130a; mmu-miR-200b; mmu-miR-130b; mmu-miR-369-3p; mmu-miR-466b-3p; mmu-miR-155; mmu-let-7a; mmu-miR-27a; mmu-miR-467h; mmu-miR-182; mmu-miR-129-2-3p; mmu-miR-129-1-3p; mmu-let-7g; mmu-miR-297c; mmu-miR-429; mmu-miR-125a-5p; mmu-miR-374; mmu-miR-1198-3p; mmu-miR-125b-5p; mmu-miR-762; mmu-let-7c; mmu-miR-377; mmu-miR-466c-3p; mmu-miR-33…
Msrb3	2.972	67	22.5437	mmu-miR-495; mmu-miR-467e; mmu-miR-29b; mmu-miR-431; mmu-miR-19a; mmu-miR-340-5p; mmu-miR-466b-3p; mmu-miR-323-3p; mmu-miR-29c; mmu-miR-155; mmu-miR-205; mmu-miR-367; mmu-miR-34a; mmu-miR-467h; mmu-miR-129-2-3p; mmu-miR-26b; mmu-miR-672; mmu-miR-129-1-3p; mmu-miR-19b; mmu-miR-195; mmu-miR-32; mmu-miR-142-3p; mmu-miR-350; mmu-miR-297c; mmu-miR-669l; mmu-miR-136; mmu-miR-16; mmu-miR-669f-5p; mmu-mi…
Mthfd1	0.244	5	20.4918	mmu-miR-466a-3p; mmu-miR-467f; mmu-miR-421; mmu-miR-378; mmu-miR-193b
Mthfr	3.963	83	20.9437	mmu-miR-200a; mmu-miR-335-5p; mmu-miR-466g; mmu-miR-431; mmu-miR-150; mmu-miR-674; mmu-miR-467f; mmu-miR-296-5p; mmu-miR-291a-5p; mmu-miR-21; mmu-miR-205; mmu-miR-543; mmu-miR-367; mmu-miR-291b-5p; mmu-miR-34a; mmu-miR-27a; mmu-miR-541; mmu-miR-1983; mmu-miR-129-2-3p; mmu-miR-672; mmu-miR-421; mmu-miR-1952; mmu-miR-129-1-3p; mmu-miR-423-5p; mmu-miR-195; mmu-miR-32; mmu-miR-350; mmu-miR-124; mmu-m…
Mtmr7	1.291	25	19.3648	mmu-miR-145; mmu-miR-93; mmu-miR-335-5p; mmu-miR-130a; mmu-miR-760-5p; mmu-miR-466g; mmu-miR-20b; mmu-miR-130b; mmu-miR-150; mmu-miR-20a; mmu-miR-340-5p; mmu-miR-762; mmu-miR-291a-5p; mmu-miR-291b-3p; mmu-miR-205; mmu-miR-335-3p; mmu-miR-291b-5p; mmu-miR-376a; mmu-miR-106b; mmu-miR-301a; mmu-miR-1983; mmu-miR-106a; mmu-miR-17; mmu-miR-33
Mtrr	1.508	22	14.5889	mmu-miR-32; mmu-miR-142-3p; mmu-miR-145; mmu-miR-669l; mmu-miR-136; mmu-miR-374; mmu-miR-466g; mmu-miR-669f-5p; mmu-miR-363-3p; mmu-miR-369-3p; mmu-miR-290-3p; mmu-miR-335-3p; mmu-miR-367; mmu-miR-669a-5p; mmu-miR-467a; mmu-miR-25; mmu-miR-1983; mmu-miR-292-3p; mmu-miR-142-5p; mmu-miR-33; mmu-miR-410
Mutyh	1.066	18	16.8856	mmu-miR-1960; mmu-miR-18b; mmu-miR-762; mmu-miR-741; mmu-miR-151-5p; mmu-miR-28; mmu-miR-434-3p; mmu-miR-34c; mmu-miR-335-3p; mmu-miR-669f-3p; mmu-miR-34a; mmu-miR-99b; mmu-miR-329; mmu-miR-1224; mmu-miR-33; mmu-miR-1935; mmu-miR-423-5p
Mxd4	3.105	52	16.7472	mmu-miR-93; mmu-miR-467c; mmu-miR-20a; mmu-miR-340-5p; mmu-miR-466b-3p; mmu-miR-30d; mmu-miR-30a; mmu-miR-434-3p; mmu-miR-669o-5p; mmu-miR-21; mmu-miR-669o-3p; mmu-miR-30b; mmu-miR-1198-5p; mmu-miR-106a; mmu-miR-1983; mmu-miR-129-2-3p; mmu-miR-17; mmu-miR-672; mmu-miR-1952; mmu-miR-129-1-3p; mmu-miR-423-5p; mmu-miR-195; mmu-miR-669a-3p; mmu-miR-297c; mmu-miR-669l; mmu-miR-16; mmu-miR-669d; mmu-mi…
Mxra7	1.478	27	18.2679	mmu-miR-466a-3p; mmu-miR-302d; mmu-miR-29b; mmu-miR-96; mmu-miR-125a-5p; mmu-miR-466g; mmu-miR-467c; mmu-miR-295; mmu-miR-340-5p; mmu-miR-125b-5p; mmu-miR-376c; mmu-miR-377; mmu-miR-291b-3p; mmu-miR-669o-5p; mmu-miR-290-3p; mmu-miR-29a; mmu-miR-29c; mmu-miR-134; mmu-miR-467a; mmu-miR-193b; mmu-miR-376b; mmu-miR-182; mmu-miR-291a-3p; mmu-miR-154; mmu-miR-292-3p; mmu-miR-302a; mmu-miR-294
Myb	1.237	34	27.4859	mmu-miR-467e; mmu-miR-29b; mmu-miR-200b; mmu-miR-340-5p; mmu-miR-28; mmu-miR-29c; mmu-miR-155; mmu-miR-543; mmu-miR-367; mmu-miR-132; mmu-miR-1198-5p; mmu-miR-191; mmu-miR-467h; mmu-miR-421; mmu-miR-195; mmu-miR-32; mmu-miR-433; mmu-miR-669l; mmu-miR-429; mmu-miR-16; mmu-miR-1198-3p; mmu-miR-363-3p; mmu-miR-669f-5p; mmu-miR-377; mmu-miR-741; mmu-miR-291b-3p; mmu-miR-29a; mmu-miR-669a-5p; mmu-miR-…
Myc	0.466	3	6.43777	mmu-miR-672; mmu-miR-340-5p; mmu-miR-741
Mycl1	1.97	48	24.3655	mmu-miR-495; mmu-miR-93; mmu-miR-713; mmu-miR-19a; mmu-miR-150; mmu-miR-20a; mmu-miR-467f; mmu-miR-340-5p; mmu-miR-28; mmu-miR-21; mmu-miR-205; mmu-miR-155; mmu-let-7a; mmu-miR-669o-3p; mmu-miR-27a; mmu-miR-106a; mmu-miR-103; mmu-miR-17; mmu-miR-129-2-3p; mmu-miR-202-3p; mmu-miR-381; mmu-miR-129-1-3p; mmu-miR-19b; mmu-miR-669a-3p; mmu-let-7g; mmu-miR-195; mmu-miR-872; mmu-miR-16; mmu-miR-669d; mm…
Mycn	0.91	11	12.0879	mmu-miR-466a-3p; mmu-miR-434-3p; mmu-miR-669o-5p; mmu-miR-495; mmu-miR-760-3p; mmu-miR-669d; mmu-miR-1983; mmu-miR-381; mmu-miR-28; mmu-miR-377; mmu-miR-423-5p
Myh14	0.407	7	17.199	mmu-miR-155; mmu-miR-145; mmu-miR-129-2-3p; mmu-miR-296-5p; mmu-miR-129-1-3p; mmu-miR-28; mmu-miR-183
Myl4	0.374	8	21.3904	mmu-miR-293; mmu-miR-1198-5p; mmu-miR-431; mmu-miR-376b; mmu-miR-468; mmu-miR-484; mmu-miR-150; mmu-miR-1952
Myl9	0.496	11	22.1774	mmu-let-7g; mmu-miR-297c; mmu-miR-134; mmu-let-7a; mmu-miR-1198-5p; mmu-miR-760-5p; mmu-let-7e; mmu-miR-296-5p; mmu-miR-297a; mmu-let-7c
Myo1b	1.408	31	22.017	mmu-miR-142-3p; mmu-miR-297c; mmu-miR-148b; mmu-miR-96; mmu-miR-136; mmu-miR-130a; mmu-miR-374; mmu-miR-148a; mmu-miR-669d; mmu-miR-19a; mmu-miR-130b; mmu-miR-674; mmu-miR-369-3p; mmu-miR-30d; mmu-miR-741; mmu-miR-30a; mmu-miR-101b; mmu-miR-330; mmu-miR-152; mmu-miR-335-3p; mmu-miR-132; mmu-miR-30b; mmu-miR-1198-5p; mmu-miR-301a; mmu-miR-1935; mmu-miR-297a; mmu-miR-19b
Myo1c	1.274	29	22.763	mmu-miR-466a-3p; mmu-miR-195; mmu-miR-297c; mmu-miR-124; mmu-miR-96; mmu-miR-16; mmu-miR-760-5p; mmu-miR-150; mmu-miR-340-5p; mmu-miR-18b; mmu-miR-762; mmu-miR-34c; mmu-miR-181a; mmu-miR-330; mmu-miR-34a; mmu-miR-15a; mmu-miR-1198-5p; mmu-miR-541; mmu-miR-182; mmu-miR-672; mmu-miR-142-5p; mmu-miR-1935; mmu-miR-297a; mmu-miR-15b
Myof	0.693	23	33.189	mmu-miR-297c; mmu-miR-145; mmu-miR-124; mmu-miR-669l; mmu-miR-335-5p; mmu-miR-431; mmu-miR-669f-5p; mmu-miR-340-5p; mmu-miR-18b; mmu-miR-377; mmu-miR-323-3p; mmu-miR-330; mmu-miR-669a-5p; mmu-miR-382; mmu-miR-468; mmu-miR-129-2-3p; mmu-miR-26b; mmu-miR-297a; mmu-miR-26a; mmu-miR-129-1-3p; mmu-miR-423-5p
N28178	5.151	110	21.3551	mmu-miR-495; mmu-miR-335-5p; mmu-miR-96; mmu-miR-466g; mmu-miR-431; mmu-miR-466b-3p; mmu-miR-296-5p; mmu-miR-434-3p; mmu-miR-155; mmu-miR-202-3p; mmu-miR-672; mmu-miR-154; mmu-miR-302a; mmu-miR-466a-3p; mmu-miR-302d; mmu-miR-195; mmu-miR-124; mmu-miR-148b; mmu-miR-669l; mmu-miR-125a-5p; mmu-miR-148a; mmu-miR-669f-5p; mmu-miR-295; mmu-miR-125b-5p; mmu-miR-377; mmu-miR-466c-3p; mmu-miR-34c; mmu-miR…
Nadsyn1	1.888	37	19.5975	mmu-miR-145; mmu-miR-431; mmu-miR-467f; mmu-miR-28; mmu-miR-34a; mmu-miR-129-2-3p; mmu-miR-421; mmu-miR-129-1-3p; mmu-miR-302a; mmu-miR-195; mmu-miR-302d; mmu-miR-148b; mmu-miR-136; mmu-miR-125a-5p; mmu-miR-16; mmu-miR-760-5p; mmu-miR-148a; mmu-miR-669d; mmu-miR-484; mmu-miR-295; mmu-miR-125b-5p; mmu-miR-151-5p; mmu-miR-741; mmu-miR-152; mmu-miR-330; mmu-miR-34c; mmu-miR-760-3p; mmu-miR-15a; mmu-…
Nanog	1.078	9	8.34879	mmu-miR-32; mmu-miR-141; mmu-miR-200a; mmu-miR-669f-3p; mmu-miR-367; mmu-miR-25; mmu-miR-363-3p; mmu-miR-329; mmu-miR-292-5p
Napa	1.41	27	19.1489	mmu-miR-32; mmu-miR-195; mmu-miR-297c; mmu-miR-124; mmu-miR-335-5p; mmu-miR-872; mmu-miR-16; mmu-miR-669d; mmu-miR-363-3p; mmu-miR-467f; mmu-miR-762; mmu-miR-34c; mmu-miR-330; mmu-miR-205; mmu-miR-669f-3p; mmu-miR-367; mmu-miR-34a; mmu-miR-382; mmu-miR-15a; mmu-miR-25; mmu-miR-182; mmu-miR-672; mmu-miR-1952; mmu-miR-1935; mmu-miR-297a; mmu-miR-15b
Nasp	0.664	11	16.5663	mmu-miR-32; mmu-miR-335-3p; mmu-miR-205; mmu-miR-367; mmu-miR-872; mmu-miR-669d; mmu-miR-25; mmu-miR-363-3p; mmu-miR-484; mmu-miR-129-2-3p; mmu-miR-129-1-3p
Nat8l	4.769	102	21.3881	mmu-miR-495; mmu-miR-93; mmu-miR-96; mmu-miR-19a; mmu-miR-20a; mmu-miR-466b-3p; mmu-miR-296-5p; mmu-miR-29c; mmu-miR-290-3p; mmu-let-7a; mmu-miR-106a; mmu-miR-17; mmu-miR-129-2-3p; mmu-miR-381; mmu-miR-292-3p; mmu-miR-129-1-3p; mmu-let-7g; mmu-miR-195; mmu-miR-124; mmu-miR-148b; mmu-miR-669l; mmu-miR-125a-5p; mmu-miR-760-5p; mmu-miR-148a; mmu-miR-669f-5p; mmu-miR-20b; mmu-miR-23b; mmu-miR-125b-5p…
Nbea	1.709	48	28.0866	mmu-miR-495; mmu-miR-804; mmu-miR-713; mmu-miR-96; mmu-miR-467f; mmu-miR-340-5p; mmu-miR-28; mmu-miR-434-3p; mmu-miR-181a; mmu-miR-21; mmu-miR-367; mmu-miR-26b; mmu-miR-672; mmu-miR-381; mmu-miR-302a; mmu-miR-195; mmu-miR-302d; mmu-miR-32; mmu-miR-124; mmu-miR-350; mmu-miR-16; mmu-miR-363-3p; mmu-miR-295; mmu-miR-1196; mmu-miR-330; mmu-miR-335-3p; mmu-miR-760-3p; mmu-miR-134; mmu-miR-15a; mmu-miR…
Ncam1	3.307	68	20.5624	mmu-miR-200a; mmu-miR-495; mmu-miR-29b; mmu-miR-145; mmu-miR-93; mmu-miR-713; mmu-miR-96; mmu-miR-200b; mmu-miR-150; mmu-miR-369-3p; mmu-miR-20a; mmu-miR-467f; mmu-miR-340-5p; mmu-miR-466b-3p; mmu-miR-296-5p; mmu-miR-291a-5p; mmu-miR-434-3p; mmu-miR-21; mmu-miR-29c; mmu-miR-669f-3p; mmu-miR-291b-5p; mmu-miR-191; mmu-miR-106a; mmu-miR-129-2-3p; mmu-miR-17; mmu-miR-202-3p; mmu-miR-421; mmu-miR-154;…
Ncapd2	0.467	7	14.9893	mmu-miR-152; mmu-miR-103; mmu-miR-1960; mmu-miR-148b; mmu-miR-1952; mmu-miR-193b; mmu-miR-148a
Ncapg	0.584	12	20.5479	mmu-miR-1196; mmu-miR-433; mmu-miR-291b-5p; mmu-miR-429; mmu-miR-27a; mmu-miR-200b; mmu-miR-183; mmu-miR-200c; mmu-miR-376c; mmu-miR-1935; mmu-miR-292-5p; mmu-miR-291a-5p
Ncaph	2.082	41	19.6926	mmu-miR-29b; mmu-miR-145; mmu-miR-713; mmu-miR-130a; mmu-miR-466g; mmu-miR-19a; mmu-miR-130b; mmu-miR-296-5p; mmu-miR-28; mmu-miR-29c; mmu-miR-103; mmu-miR-1983; mmu-miR-129-2-3p; mmu-miR-26b; mmu-miR-1952; mmu-miR-129-1-3p; mmu-miR-19b; mmu-miR-124; mmu-miR-350; mmu-miR-136; mmu-miR-125a-5p; mmu-miR-484; mmu-miR-125b-5p; mmu-miR-18b; mmu-miR-23b; mmu-miR-762; mmu-miR-151-5p; mmu-miR-127; mmu-miR…
Ncdn	1.085	23	21.1982	mmu-miR-32; mmu-miR-467e; mmu-miR-125a-5p; mmu-miR-466g; mmu-miR-484; mmu-miR-363-3p; mmu-miR-125b-5p; mmu-miR-762; mmu-miR-28; mmu-miR-367; mmu-miR-27a; mmu-miR-467h; mmu-miR-541; mmu-miR-25; mmu-miR-103; mmu-miR-129-2-3p; mmu-miR-26b; mmu-miR-672; mmu-miR-26a; mmu-miR-129-1-3p; mmu-miR-423-5p
Ncl	5.901	103	17.4547	mmu-miR-495; mmu-miR-145; mmu-miR-804; mmu-miR-335-5p; mmu-miR-96; mmu-miR-467c; mmu-miR-30d; mmu-miR-30a; mmu-miR-434-3p; mmu-miR-29c; mmu-miR-290-3p; mmu-let-7a; mmu-miR-541; mmu-miR-129-2-3p; mmu-miR-202-3p; mmu-miR-381; mmu-miR-292-3p; mmu-miR-129-1-3p; mmu-miR-302a; mmu-miR-302d; mmu-let-7g; mmu-miR-195; mmu-miR-433; mmu-miR-124; mmu-miR-148b; mmu-miR-669l; mmu-miR-136; mmu-miR-1198-3p; mmu-…
Ncoa4	3.619	75	20.724	mmu-miR-200a; mmu-miR-29b; mmu-miR-145; mmu-miR-713; mmu-miR-96; mmu-miR-200b; mmu-miR-466g; mmu-miR-19a; mmu-miR-369-3p; mmu-miR-467f; mmu-miR-291a-5p; mmu-miR-28; mmu-miR-21; mmu-miR-181a; mmu-miR-29c; mmu-miR-205; mmu-miR-155; mmu-miR-291b-5p; mmu-miR-132; mmu-miR-669o-3p; mmu-miR-34a; mmu-miR-27a; mmu-miR-1198-5p; mmu-miR-541; mmu-miR-468; mmu-miR-182; mmu-miR-129-2-3p; mmu-miR-26b; mmu-miR-6…
Ncor1	1.417	30	21.1715	mmu-miR-466a-3p; mmu-miR-200a; mmu-miR-142-3p; mmu-miR-495; mmu-miR-1960; mmu-miR-148b; mmu-miR-145; mmu-miR-93; mmu-miR-804; mmu-miR-713; mmu-miR-148a; mmu-miR-669d; mmu-miR-20b; mmu-miR-20a; mmu-miR-18b; mmu-miR-377; mmu-miR-101b; mmu-miR-141; mmu-miR-152; mmu-miR-132; mmu-miR-106b; mmu-miR-183; mmu-miR-106a; mmu-miR-17; mmu-miR-410
Ndrg2	0.869	19	21.8642	mmu-miR-297c; mmu-miR-93; mmu-miR-125a-5p; mmu-miR-484; mmu-miR-20b; mmu-miR-20a; mmu-miR-125b-5p; mmu-miR-30d; mmu-miR-296-5p; mmu-miR-741; mmu-miR-377; mmu-miR-30a; mmu-miR-760-3p; mmu-miR-106b; mmu-miR-30b; mmu-miR-106a; mmu-miR-17; mmu-miR-297a; mmu-miR-423-5p
Necap2	1.052	20	19.0114	mmu-miR-1960; mmu-miR-96; mmu-miR-125a-5p; mmu-miR-466g; mmu-miR-669d; mmu-miR-720; mmu-miR-125b-5p; mmu-miR-762; mmu-miR-296-5p; mmu-miR-323-3p; mmu-miR-28; mmu-miR-330; mmu-miR-205; mmu-miR-335-3p; mmu-miR-22; mmu-miR-382; mmu-miR-1198-5p; mmu-miR-329; mmu-miR-1952; mmu-miR-1935
Nefh	0.591	24	40.6091	mmu-miR-302d; mmu-miR-200a; mmu-miR-297c; mmu-miR-125a-5p; mmu-miR-467c; mmu-miR-295; mmu-miR-125b-5p; mmu-miR-141; mmu-miR-291b-3p; mmu-miR-290-3p; mmu-miR-467a; mmu-miR-532-5p; mmu-miR-103; mmu-miR-291a-3p; mmu-miR-1952; mmu-miR-292-3p; mmu-miR-297a; mmu-miR-302a; mmu-miR-294
Nefl	1.648	51	30.9466	mmu-miR-495; mmu-miR-335-5p; mmu-miR-130a; mmu-miR-130b; mmu-miR-369-3p; mmu-miR-467f; mmu-miR-340-5p; mmu-miR-30d; mmu-miR-291a-5p; mmu-miR-30a; mmu-miR-205; mmu-miR-367; mmu-miR-291b-5p; mmu-miR-30b; mmu-miR-468; mmu-miR-103; mmu-miR-26b; mmu-miR-672; mmu-miR-466a-3p; mmu-miR-32; mmu-miR-142-3p; mmu-miR-433; mmu-miR-669l; mmu-miR-374; mmu-miR-760-5p; mmu-miR-1198-3p; mmu-miR-669d; mmu-miR-669f-…
Nefm	0.754	12	15.9151	mmu-miR-330; mmu-miR-297c; mmu-miR-335-5p; mmu-miR-1198-5p; mmu-miR-431; mmu-miR-1198-3p; mmu-miR-19a; mmu-miR-150; mmu-miR-297a; mmu-miR-19b; mmu-miR-423-5p
Nes	0.421	14	33.2542	mmu-miR-330; mmu-miR-152; mmu-miR-1960; mmu-miR-148b; mmu-miR-291b-5p; mmu-miR-148a; mmu-miR-541; mmu-miR-1983; mmu-miR-1952; mmu-miR-296-5p; mmu-miR-291a-5p; mmu-miR-741; mmu-miR-423-5p
Neu1	1.09	26	23.8532	mmu-miR-669a-3p; mmu-miR-302d; mmu-miR-195; mmu-miR-124; mmu-miR-93; mmu-miR-16; mmu-miR-125a-5p; mmu-miR-20b; mmu-miR-150; mmu-miR-295; mmu-miR-20a; mmu-miR-18b; mmu-miR-125b-5p; mmu-miR-291a-5p; mmu-miR-291b-5p; mmu-miR-669o-3p; mmu-miR-22; mmu-miR-15a; mmu-miR-106b; mmu-miR-106a; mmu-miR-103; mmu-miR-17; mmu-miR-291a-3p; mmu-miR-302a; mmu-miR-15b; mmu-miR-294
Nfatc2ip	2.127	54	25.3879	mmu-miR-29b; mmu-miR-145; mmu-miR-96; mmu-miR-19a; mmu-miR-150; mmu-miR-467f; mmu-miR-340-5p; mmu-miR-28; mmu-miR-669o-5p; mmu-miR-181a; mmu-miR-29c; mmu-miR-205; mmu-miR-543; mmu-miR-132; mmu-miR-34a; mmu-miR-182; mmu-miR-19b; mmu-miR-466a-3p; mmu-miR-142-3p; mmu-miR-297c; mmu-miR-350; mmu-miR-669l; mmu-miR-760-5p; mmu-miR-669d; mmu-miR-669f-5p; mmu-miR-376c; mmu-miR-34c; mmu-miR-29a; mmu-miR-33…
Nfic	4.868	91	18.6935	mmu-miR-200a; mmu-miR-495; mmu-miR-29b; mmu-miR-335-5p; mmu-miR-466g; mmu-miR-467c; mmu-miR-150; mmu-miR-674; mmu-miR-466b-3p; mmu-miR-296-5p; mmu-miR-291a-5p; mmu-miR-29c; mmu-miR-290-3p; mmu-miR-205; mmu-miR-291b-5p; mmu-let-7a; mmu-miR-669o-3p; mmu-miR-467a; mmu-miR-468; mmu-miR-103; mmu-miR-129-2-3p; mmu-miR-672; mmu-miR-292-3p; mmu-miR-129-1-3p; mmu-miR-302a; mmu-miR-423-5p; mmu-miR-669a-3p;…
Nfil3	0.269	14	52.0446	mmu-miR-466c-3p; mmu-miR-142-3p; mmu-miR-297c; mmu-miR-93; mmu-miR-106b; mmu-miR-669d; mmu-miR-106a; mmu-miR-20b; mmu-miR-17; mmu-miR-20a; mmu-miR-340-5p; mmu-miR-142-5p; mmu-miR-466b-3p; mmu-miR-297a
Nfix	3.951	71	17.9701	mmu-miR-495; mmu-miR-29b; mmu-miR-93; mmu-miR-713; mmu-miR-130a; mmu-miR-130b; mmu-miR-674; mmu-miR-20a; mmu-miR-467f; mmu-miR-340-5p; mmu-miR-466b-3p; mmu-miR-296-5p; mmu-miR-323-3p; mmu-miR-434-3p; mmu-miR-29c; mmu-miR-669f-3p; mmu-miR-367; mmu-miR-34a; mmu-miR-191; mmu-miR-106a; mmu-miR-129-2-3p; mmu-miR-17; mmu-miR-1952; mmu-miR-129-1-3p; mmu-miR-423-5p; mmu-miR-466a-3p; mmu-miR-32; mmu-miR-2…
Nfx1	1.763	17	9.64265	mmu-miR-466a-3p; mmu-miR-467e; mmu-miR-350; mmu-miR-713; mmu-miR-335-5p; mmu-miR-466g; mmu-miR-150; mmu-miR-762; mmu-miR-291a-5p; mmu-miR-205; mmu-miR-291b-5p; mmu-miR-669f-3p; mmu-miR-193b; mmu-miR-467h; mmu-miR-129-2-3p; mmu-miR-129-1-3p
Ngb	0.881	11	12.4858	mmu-miR-34c; mmu-miR-155; mmu-miR-760-3p; mmu-miR-34a; mmu-miR-1198-5p; mmu-miR-760-5p; mmu-miR-193b; mmu-miR-669d; mmu-miR-762; mmu-miR-296-5p
Ngf	0.165	7	42.4242	mmu-let-7g; mmu-let-7e; mmu-miR-202-3p; mmu-let-7a; mmu-miR-374; mmu-let-7c; mmu-miR-423-5p
Nhp2l1	0.787	13	16.5184	mmu-miR-335-3p; mmu-miR-297c; mmu-miR-1960; mmu-miR-760-5p; mmu-miR-183; mmu-miR-1198-3p; mmu-miR-541; mmu-miR-129-2-3p; mmu-miR-150; mmu-miR-674; mmu-miR-154; mmu-miR-129-1-3p; mmu-miR-297a
Nkiras2	1.374	31	22.5619	mmu-miR-195; mmu-let-7g; mmu-miR-467e; mmu-miR-29b; mmu-miR-297c; mmu-miR-713; mmu-miR-16; mmu-miR-125a-5p; mmu-miR-431; mmu-miR-674; mmu-miR-340-5p; mmu-miR-125b-5p; mmu-miR-762; mmu-let-7c; mmu-miR-101b; mmu-miR-669o-5p; mmu-miR-29c; mmu-miR-29a; mmu-miR-760-3p; mmu-let-7a; mmu-miR-99b; mmu-miR-378; mmu-miR-15a; mmu-miR-467h; mmu-miR-193b; mmu-let-7e; mmu-miR-202-3p; mmu-miR-142-5p; mmu-miR-297…
Nkx1-2	2.235	40	17.8971	mmu-miR-495; mmu-miR-29b; mmu-miR-804; mmu-miR-713; mmu-miR-150; mmu-miR-674; mmu-miR-340-5p; mmu-miR-466b-3p; mmu-miR-30d; mmu-miR-30a; mmu-miR-29c; mmu-miR-669o-3p; mmu-miR-34a; mmu-miR-27a; mmu-miR-30b; mmu-miR-1983; mmu-miR-423-5p; mmu-miR-669a-3p; mmu-miR-433; mmu-miR-1960; mmu-miR-136; mmu-miR-376c; mmu-miR-762; mmu-miR-151-5p; mmu-miR-377; mmu-miR-466c-3p; mmu-miR-34c; mmu-miR-29a; mmu-miR…
Nlrp4f	0.588	13	22.1088	mmu-miR-141; mmu-miR-34c; mmu-miR-200a; mmu-miR-155; mmu-miR-93; mmu-miR-34a; mmu-miR-1198-5p; mmu-miR-106b; mmu-miR-106a; mmu-miR-20b; mmu-miR-17; mmu-miR-20a; mmu-miR-381
Nosip	1.12	19	16.9643	mmu-miR-466a-3p; mmu-let-7g; mmu-miR-467f; mmu-miR-23b; mmu-miR-340-5p; mmu-miR-762; mmu-let-7c; mmu-miR-741; mmu-miR-323-3p; mmu-miR-760-3p; mmu-let-7a; mmu-miR-134; mmu-miR-669f-3p; mmu-miR-541; mmu-miR-103; mmu-let-7e; mmu-miR-23a; mmu-miR-410; mmu-miR-423-5p
Notch4	3.292	77	23.39	mmu-miR-29b; mmu-miR-467c; mmu-miR-150; mmu-miR-674; mmu-miR-296-5p; mmu-miR-291a-5p; mmu-miR-28; mmu-miR-181a; mmu-miR-29c; mmu-miR-367; mmu-miR-291b-5p; mmu-miR-132; mmu-miR-34a; mmu-miR-1893; mmu-miR-27a; mmu-miR-541; mmu-miR-129-2-3p; mmu-miR-26b; mmu-miR-1952; mmu-miR-129-1-3p; mmu-miR-423-5p; mmu-miR-32; mmu-miR-148b; mmu-miR-1960; mmu-miR-669l; mmu-miR-136; mmu-miR-760-5p; mmu-miR-148a; mm…
Npm1	0.527	13	24.6679	mmu-miR-466c-3p; mmu-miR-466a-3p; mmu-miR-141; mmu-miR-200a; mmu-miR-181a; mmu-miR-669f-3p; mmu-miR-374; mmu-miR-1198-5p; mmu-miR-329; mmu-miR-142-5p; mmu-miR-1952; mmu-miR-466b-3p
Nqo1	0.594	11	18.5185	mmu-miR-669a-3p; mmu-miR-760-3p; mmu-miR-134; mmu-miR-669o-3p; mmu-miR-30b; mmu-miR-431; mmu-miR-18b; mmu-miR-30d; mmu-miR-28; mmu-miR-30a; mmu-miR-377
Nr0b1	0.352	8	22.7273	mmu-miR-541; mmu-miR-350; mmu-miR-205; mmu-miR-669f-3p; mmu-miR-381; mmu-miR-136; mmu-miR-532-5p
Nr2f2	2.711	82	30.2471	mmu-miR-200a; mmu-miR-467e; mmu-miR-93; mmu-miR-804; mmu-miR-96; mmu-miR-130a; mmu-miR-466g; mmu-miR-467c; mmu-miR-130b; mmu-miR-369-3p; mmu-miR-20a; mmu-miR-30d; mmu-miR-296-5p; mmu-miR-30a; mmu-miR-669o-5p; mmu-miR-21; mmu-miR-290-3p; mmu-miR-669f-3p; mmu-miR-467a; mmu-miR-30b; mmu-miR-467h; mmu-miR-106a; mmu-miR-1983; mmu-miR-129-2-3p; mmu-miR-17; mmu-miR-672; mmu-miR-292-3p; mmu-miR-129-1-3p;…
Nr4a1	0.54	6	11.1111	mmu-miR-21; mmu-miR-150; mmu-miR-124; mmu-miR-329; mmu-miR-1198-5p; mmu-miR-101b
Nr4a2	1.634	30	18.3599	mmu-miR-466a-3p; mmu-miR-467e; mmu-miR-297c; mmu-miR-145; mmu-miR-374; mmu-miR-150; mmu-miR-369-3p; mmu-miR-340-5p; mmu-miR-762; mmu-miR-101b; mmu-miR-434-3p; mmu-miR-669f-3p; mmu-miR-543; mmu-miR-134; mmu-miR-22; mmu-miR-467h; mmu-miR-103; mmu-miR-1983; mmu-miR-129-2-3p; mmu-miR-142-5p; mmu-miR-33; mmu-miR-129-1-3p; mmu-miR-1935; mmu-miR-297a; mmu-miR-410
Nrcam	3.259	57	17.49	mmu-miR-200a; mmu-miR-713; mmu-miR-96; mmu-miR-200b; mmu-miR-431; mmu-miR-674; mmu-miR-369-3p; mmu-miR-340-5p; mmu-miR-291a-5p; mmu-miR-181a; mmu-miR-669f-3p; mmu-miR-543; mmu-miR-291b-5p; mmu-miR-191; mmu-miR-541; mmu-miR-1983; mmu-miR-103; mmu-miR-182; mmu-miR-129-2-3p; mmu-miR-421; mmu-miR-129-1-3p; mmu-miR-433; mmu-miR-350; mmu-miR-124; mmu-miR-297c; mmu-miR-429; mmu-miR-136; mmu-miR-125a-5p;…
Nrf1	1.781	35	19.6519	mmu-miR-32; mmu-miR-200a; mmu-miR-350; mmu-miR-1960; mmu-miR-148b; mmu-miR-136; mmu-miR-130a; mmu-miR-872; mmu-miR-148a; mmu-miR-363-3p; mmu-miR-130b; mmu-miR-467f; mmu-miR-762; mmu-miR-141; mmu-miR-330; mmu-miR-152; mmu-miR-367; mmu-miR-134; mmu-miR-22; mmu-miR-293; mmu-miR-378; mmu-miR-27a; mmu-miR-301a; mmu-miR-25; mmu-miR-468; mmu-miR-182; mmu-miR-1983; mmu-miR-329; mmu-miR-292-5p; mmu-miR-46…
Nrn1	1.003	11	10.9671	mmu-miR-335-5p; mmu-miR-1893; mmu-miR-27a; mmu-miR-669d; mmu-miR-1983; mmu-miR-1224; mmu-miR-672; mmu-miR-741; mmu-miR-101b; mmu-miR-423-5p
Nrp1	2.648	45	16.994	mmu-miR-200a; mmu-miR-495; mmu-miR-467e; mmu-miR-335-5p; mmu-miR-130a; mmu-miR-431; mmu-miR-130b; mmu-miR-467f; mmu-miR-30d; mmu-miR-291a-5p; mmu-miR-30a; mmu-miR-181a; mmu-miR-155; mmu-miR-669f-3p; mmu-miR-543; mmu-miR-291b-5p; mmu-miR-30b; mmu-miR-467h; mmu-miR-1983; mmu-miR-129-2-3p; mmu-miR-26b; mmu-miR-381; mmu-miR-1952; mmu-miR-129-1-3p; mmu-miR-466a-3p; mmu-miR-124; mmu-miR-148b; mmu-miR-3…
Nrxn2	1.069	8	7.48363	mmu-miR-34c; mmu-miR-330; mmu-miR-495; mmu-miR-34a; mmu-miR-378; mmu-miR-1198-3p; mmu-miR-150; mmu-miR-1935
Nsg1	1.479	20	13.5227	mmu-miR-1960; mmu-miR-713; mmu-miR-335-5p; mmu-miR-125a-5p; mmu-miR-150; mmu-miR-125b-5p; mmu-miR-762; mmu-miR-1196; mmu-miR-291b-3p; mmu-miR-330; mmu-miR-34c; mmu-miR-155; mmu-miR-760-3p; mmu-miR-134; mmu-miR-34a; mmu-miR-1198-5p; mmu-miR-129-2-3p; mmu-miR-33; mmu-miR-129-1-3p; mmu-miR-423-5p
Nsl1	4.025	70	17.3913	mmu-miR-200a; mmu-miR-495; mmu-miR-29b; mmu-miR-145; mmu-miR-713; mmu-miR-335-5p; mmu-miR-200b; mmu-miR-467c; mmu-miR-150; mmu-miR-674; mmu-miR-369-3p; mmu-miR-467f; mmu-miR-323-3p; mmu-miR-434-3p; mmu-miR-181a; mmu-miR-29c; mmu-miR-290-3p; mmu-miR-155; mmu-miR-543; mmu-miR-467a; mmu-miR-27a; mmu-miR-1983; mmu-miR-129-2-3p; mmu-miR-292-3p; mmu-miR-1952; mmu-miR-129-1-3p; mmu-miR-302a; mmu-miR-466…
Nt5e	1.775	51	28.7324	mmu-miR-495; mmu-miR-335-5p; mmu-miR-200b; mmu-miR-431; mmu-miR-674; mmu-miR-467f; mmu-miR-30d; mmu-miR-30a; mmu-miR-669o-5p; mmu-miR-181a; mmu-miR-669f-3p; mmu-miR-30b; mmu-miR-1198-5p; mmu-miR-468; mmu-miR-381; mmu-miR-466a-3p; mmu-miR-124; mmu-miR-1960; mmu-miR-297c; mmu-miR-669l; mmu-miR-429; mmu-miR-125a-5p; mmu-miR-374; mmu-miR-669f-5p; mmu-miR-125b-5p; mmu-miR-741; mmu-miR-1196; mmu-miR-13…
Nub1	1.211	25	20.6441	mmu-miR-195; mmu-miR-200a; mmu-miR-297c; mmu-miR-145; mmu-miR-93; mmu-miR-16; mmu-miR-1198-3p; mmu-miR-467c; mmu-miR-20b; mmu-miR-20a; mmu-miR-741; mmu-miR-141; mmu-miR-291b-3p; mmu-miR-34c; mmu-miR-34a; mmu-miR-15a; mmu-miR-106b; mmu-miR-106a; mmu-miR-17; mmu-miR-26b; mmu-miR-297a; mmu-miR-26a; mmu-miR-15b
Nubpl	1.98	35	17.6768	mmu-miR-195; mmu-miR-433; mmu-miR-148b; mmu-miR-335-5p; mmu-miR-130a; mmu-miR-374; mmu-miR-16; mmu-miR-148a; mmu-miR-130b; mmu-miR-150; mmu-miR-369-3p; mmu-miR-291a-5p; mmu-miR-152; mmu-miR-335-3p; mmu-miR-760-3p; mmu-miR-291b-5p; mmu-miR-22; mmu-miR-15a; mmu-miR-27a; mmu-miR-301a; mmu-miR-376b; mmu-miR-103; mmu-miR-129-2-3p; mmu-miR-381; mmu-miR-129-1-3p; mmu-miR-15b; mmu-miR-466f
Nucks1	5.115	137	26.784	mmu-miR-495; mmu-miR-145; mmu-miR-93; mmu-miR-804; mmu-miR-713; mmu-miR-335-5p; mmu-miR-96; mmu-miR-466g; mmu-miR-467c; mmu-miR-20a; mmu-miR-340-5p; mmu-miR-296-5p; mmu-miR-434-3p; mmu-miR-21; mmu-miR-290-3p; mmu-miR-669f-3p; mmu-miR-367; mmu-miR-106a; mmu-miR-17; mmu-miR-129-2-3p; mmu-miR-672; mmu-miR-381; mmu-miR-292-3p; mmu-miR-129-1-3p; mmu-miR-302a; mmu-miR-466a-3p; mmu-miR-302d; mmu-miR-195…
Nudcd2	0.804	15	18.6567	mmu-miR-335-3p; mmu-miR-29c; mmu-miR-29b; mmu-miR-29a; mmu-miR-145; mmu-miR-124; mmu-miR-382; mmu-miR-19a; mmu-miR-182; mmu-miR-381; mmu-miR-377; mmu-miR-19b
Nudt16l1	0.608	8	13.1579	mmu-miR-484; mmu-miR-330; mmu-miR-124; mmu-miR-760-3p; mmu-miR-22; mmu-miR-27a; mmu-miR-1935; mmu-miR-1198-3p
Nufip2	3.006	70	23.2868	mmu-miR-495; mmu-miR-145; mmu-miR-96; mmu-miR-200b; mmu-miR-466g; mmu-miR-467c; mmu-miR-19a; mmu-miR-674; mmu-miR-467f; mmu-miR-466b-3p; mmu-miR-30d; mmu-miR-291a-5p; mmu-miR-30a; mmu-miR-28; mmu-miR-155; mmu-miR-290-3p; mmu-miR-669f-3p; mmu-miR-291b-5p; mmu-miR-467a; mmu-miR-30b; mmu-miR-1198-5p; mmu-miR-541; mmu-miR-182; mmu-miR-103; mmu-miR-292-3p; mmu-miR-302a; mmu-miR-19b; mmu-miR-466a-3p; m…
Nup205	0.148	7	47.2973	mmu-miR-350; mmu-miR-340-5p; mmu-miR-142-5p; mmu-miR-741; mmu-miR-466g; mmu-miR-410
Nup210	1.331	15	11.2697	mmu-miR-330; mmu-miR-142-3p; mmu-miR-134; mmu-miR-378; mmu-miR-125a-5p; mmu-miR-532-5p; mmu-miR-541; mmu-miR-720; mmu-miR-125b-5p; mmu-miR-142-5p; mmu-miR-762; mmu-miR-296-5p; mmu-miR-377; mmu-miR-151-5p
Nup43	0.084	2	23.8095	mmu-miR-495; mmu-miR-335-3p
Nup54	0.67	7	10.4478	mmu-miR-495; mmu-miR-129-2-3p; mmu-miR-136; mmu-miR-129-1-3p; mmu-miR-872; mmu-miR-466g
Nusap1	2.255	24	10.643	mmu-miR-195; mmu-miR-495; mmu-miR-148b; mmu-miR-124; mmu-miR-374; mmu-miR-16; mmu-miR-466g; mmu-miR-148a; mmu-miR-150; mmu-miR-18b; mmu-miR-487b; mmu-miR-669o-5p; mmu-miR-152; mmu-miR-669f-3p; mmu-miR-382; mmu-miR-15a; mmu-miR-27a; mmu-miR-1224; mmu-miR-329; mmu-miR-672; mmu-miR-381; mmu-miR-1935; mmu-miR-15b
Oas1c	0.84	18	21.4286	mmu-miR-495; mmu-miR-148b; mmu-miR-713; mmu-miR-125a-5p; mmu-miR-148a; mmu-miR-669d; mmu-miR-19a; mmu-miR-125b-5p; mmu-miR-296-5p; mmu-miR-741; mmu-miR-152; mmu-miR-330; mmu-miR-183; mmu-miR-103; mmu-miR-19b; mmu-miR-423-5p
Obsl1	0.643	30	46.6563	mmu-miR-302d; mmu-miR-195; mmu-let-7g; mmu-miR-93; mmu-miR-16; mmu-miR-125a-5p; mmu-miR-760-5p; mmu-miR-1198-3p; mmu-miR-484; mmu-miR-20b; mmu-miR-295; mmu-miR-20a; mmu-miR-125b-5p; mmu-let-7c; mmu-miR-330; mmu-let-7a; mmu-miR-378; mmu-miR-15a; mmu-miR-106b; mmu-miR-106a; mmu-miR-103; mmu-let-7e; mmu-miR-1983; mmu-miR-291a-3p; mmu-miR-17; mmu-miR-202-3p; mmu-miR-302a; mmu-miR-292-5p; mmu-miR-15b;…
Ocln	2.307	56	24.2739	mmu-miR-200a; mmu-miR-495; mmu-miR-93; mmu-miR-200b; mmu-miR-19a; mmu-miR-369-3p; mmu-miR-20a; mmu-miR-467f; mmu-miR-340-5p; mmu-miR-323-3p; mmu-miR-669o-5p; mmu-miR-181a; mmu-miR-669f-3p; mmu-miR-34a; mmu-miR-27a; mmu-miR-468; mmu-miR-106a; mmu-miR-103; mmu-miR-17; mmu-miR-421; mmu-miR-381; mmu-miR-302a; mmu-miR-19b; mmu-miR-302d; mmu-miR-124; mmu-miR-350; mmu-miR-669l; mmu-miR-429; mmu-miR-374;…
Odc1	0.751	19	25.2996	mmu-miR-467e; mmu-miR-350; mmu-miR-297c; mmu-miR-335-5p; mmu-miR-136; mmu-miR-125a-5p; mmu-miR-150; mmu-miR-125b-5p; mmu-miR-330; mmu-miR-34c; mmu-miR-543; mmu-miR-132; mmu-miR-34a; mmu-miR-467h; mmu-miR-532-5p; mmu-miR-33; mmu-miR-297a; mmu-miR-423-5p
Odf2	1.085	20	18.4332	mmu-miR-433; mmu-miR-200a; mmu-miR-297c; mmu-miR-136; mmu-miR-125a-5p; mmu-miR-125b-5p; mmu-miR-762; mmu-miR-741; mmu-miR-28; mmu-miR-141; mmu-miR-335-3p; mmu-miR-132; mmu-miR-543; mmu-miR-376a; mmu-miR-541; mmu-miR-329; mmu-miR-142-5p; mmu-miR-297a
Ogfr	0.311	13	41.8006	mmu-let-7g; mmu-miR-34c; mmu-miR-330; mmu-miR-350; mmu-let-7a; mmu-miR-34a; mmu-miR-96; mmu-miR-125a-5p; mmu-let-7e; mmu-miR-202-3p; mmu-miR-125b-5p; mmu-let-7c; mmu-miR-423-5p
Olfml2b	0.464	4	8.62069	mmu-miR-466a-3p; mmu-miR-129-2-3p; mmu-miR-18b; mmu-miR-129-1-3p
Olig1	1.274	12	9.41915	mmu-miR-669o-5p; mmu-miR-330; mmu-miR-290-3p; mmu-miR-760-3p; mmu-miR-291b-5p; mmu-miR-804; mmu-miR-1893; mmu-miR-467a; mmu-miR-1952; mmu-miR-292-3p; mmu-miR-291a-5p; mmu-miR-292-5p
Os9	1.988	39	19.6177	mmu-miR-804; mmu-miR-713; mmu-miR-96; mmu-miR-674; mmu-miR-296-5p; mmu-miR-28; mmu-miR-669o-5p; mmu-miR-181a; mmu-miR-27a; mmu-miR-103; mmu-miR-182; mmu-miR-1952; mmu-miR-423-5p; mmu-miR-195; mmu-miR-148b; mmu-miR-1960; mmu-miR-350; mmu-miR-136; mmu-miR-16; mmu-miR-148a; mmu-miR-760-5p; mmu-miR-484; mmu-miR-151-5p; mmu-miR-101b; mmu-miR-741; mmu-miR-152; mmu-miR-760-3p; mmu-miR-15a; mmu-miR-378; …
Osbpl5	1.057	31	29.3283	mmu-miR-195; mmu-miR-804; mmu-miR-429; mmu-miR-136; mmu-miR-200b; mmu-miR-16; mmu-miR-125a-5p; mmu-miR-150; mmu-miR-23b; mmu-miR-125b-5p; mmu-miR-376c; mmu-miR-377; mmu-miR-34c; mmu-miR-290-3p; mmu-miR-134; mmu-miR-34a; mmu-miR-467a; mmu-miR-378; mmu-miR-15a; mmu-miR-532-5p; mmu-miR-193b; mmu-miR-1983; mmu-miR-129-2-3p; mmu-miR-200c; mmu-miR-1224; mmu-miR-672; mmu-miR-292-3p; mmu-miR-1952; mmu-mi…
Osbpl7	0.854	18	21.0773	mmu-miR-669a-3p; mmu-miR-195; mmu-miR-205; mmu-miR-124; mmu-miR-713; mmu-miR-669o-3p; mmu-miR-15a; mmu-miR-16; mmu-miR-193b; mmu-miR-1983; mmu-miR-150; mmu-miR-15b; mmu-miR-323-3p; mmu-miR-28
Osmr	1.794	56	31.2152	mmu-miR-467e; mmu-miR-29b; mmu-miR-466g; mmu-miR-467c; mmu-miR-19a; mmu-miR-674; mmu-miR-369-3p; mmu-miR-467f; mmu-miR-466b-3p; mmu-miR-30d; mmu-miR-30a; mmu-miR-28; mmu-miR-669o-5p; mmu-miR-29c; mmu-miR-155; mmu-miR-290-3p; mmu-miR-669f-3p; mmu-miR-367; mmu-miR-467a; mmu-miR-30b; mmu-miR-467h; mmu-miR-421; mmu-miR-292-3p; mmu-miR-302a; mmu-miR-423-5p; mmu-miR-19b; mmu-miR-302d; mmu-miR-32; mmu-m…
Osr1	0.874	22	25.1716	mmu-miR-93; mmu-miR-804; mmu-miR-429; mmu-miR-200b; mmu-miR-484; mmu-miR-20b; mmu-miR-20a; mmu-miR-21; mmu-miR-155; mmu-miR-290-3p; mmu-miR-760-3p; mmu-miR-467a; mmu-miR-106b; mmu-miR-541; mmu-miR-106a; mmu-miR-17; mmu-miR-200c; mmu-miR-142-5p; mmu-miR-292-3p; mmu-miR-381; mmu-miR-1935
Ostf1	1.942	18	9.2688	mmu-miR-466a-3p; mmu-miR-200a; mmu-miR-93; mmu-miR-713; mmu-miR-484; mmu-miR-20b; mmu-miR-20a; mmu-miR-23b; mmu-miR-141; mmu-miR-335-3p; mmu-miR-22; mmu-miR-106b; mmu-miR-106a; mmu-miR-468; mmu-miR-17; mmu-miR-421; mmu-miR-23a
Otud6b	2.185	70	32.0366	mmu-miR-200a; mmu-miR-495; mmu-miR-93; mmu-miR-19a; mmu-miR-369-3p; mmu-miR-20a; mmu-miR-340-5p; mmu-miR-30d; mmu-miR-30a; mmu-miR-434-3p; mmu-miR-290-3p; mmu-miR-34a; mmu-miR-467a; mmu-miR-30b; mmu-miR-1198-5p; mmu-miR-106a; mmu-miR-1983; mmu-miR-17; mmu-miR-292-3p; mmu-miR-302a; mmu-miR-19b; mmu-miR-302d; mmu-miR-1960; mmu-miR-297c; mmu-miR-374; mmu-miR-125a-5p; mmu-miR-20b; mmu-miR-295; mmu-mi…
Otud7a	0.381	6	15.748	mmu-miR-195; mmu-miR-96; mmu-miR-1935; mmu-miR-15a; mmu-miR-16; mmu-miR-15b
Otx2	1.027	28	27.2639	mmu-miR-433; mmu-miR-297c; mmu-miR-145; mmu-miR-713; mmu-miR-96; mmu-miR-872; mmu-miR-374; mmu-miR-484; mmu-miR-762; mmu-miR-291a-5p; mmu-miR-1196; mmu-miR-669o-5p; mmu-miR-330; mmu-miR-34c; mmu-miR-543; mmu-miR-291b-5p; mmu-miR-22; mmu-miR-34a; mmu-miR-99b; mmu-miR-378; mmu-miR-182; mmu-miR-1952; mmu-miR-154; mmu-miR-297a; mmu-miR-1935; mmu-miR-410
Ovol2	0.428	6	14.0187	mmu-miR-335-3p; mmu-miR-18b; mmu-miR-382; mmu-miR-1198-5p; mmu-miR-466g; mmu-miR-466f
P2ry2	1.403	15	10.6914	mmu-miR-433; mmu-miR-34c; mmu-miR-330; mmu-miR-142-3p; mmu-miR-350; mmu-miR-205; mmu-miR-134; mmu-miR-804; mmu-miR-34a; mmu-miR-22; mmu-miR-760-5p; mmu-miR-484; mmu-miR-672; mmu-miR-421; mmu-miR-762
Pa2g4	1.14	24	21.0526	mmu-miR-350; mmu-miR-148b; mmu-miR-136; mmu-miR-760-5p; mmu-miR-148a; mmu-miR-484; mmu-miR-674; mmu-miR-18b; mmu-miR-762; mmu-miR-1196; mmu-miR-291b-3p; mmu-miR-152; mmu-miR-760-3p; mmu-miR-132; mmu-miR-378; mmu-miR-26b; mmu-miR-672; mmu-miR-154; mmu-miR-1952; mmu-miR-421; mmu-miR-1935; mmu-miR-26a
Pacsin1	2.571	38	14.7802	mmu-miR-195; mmu-miR-350; mmu-miR-145; mmu-miR-713; mmu-miR-335-5p; mmu-miR-96; mmu-miR-16; mmu-miR-125a-5p; mmu-miR-760-5p; mmu-miR-484; mmu-miR-150; mmu-miR-674; mmu-miR-18b; mmu-miR-125b-5p; mmu-miR-762; mmu-miR-335-3p; mmu-miR-205; mmu-miR-760-3p; mmu-miR-378; mmu-miR-15a; mmu-miR-183; mmu-miR-103; mmu-miR-1983; mmu-miR-1224; mmu-miR-672; mmu-miR-33; mmu-miR-1935; mmu-miR-15b; mmu-miR-292-5p;…
Pacsin2	2.011	46	22.8742	mmu-miR-145; mmu-miR-96; mmu-miR-19a; mmu-miR-323-3p; mmu-miR-28; mmu-miR-290-3p; mmu-miR-132; mmu-miR-34a; mmu-miR-467a; mmu-miR-27a; mmu-miR-182; mmu-miR-129-2-3p; mmu-miR-672; mmu-miR-421; mmu-miR-292-3p; mmu-miR-1952; mmu-miR-129-1-3p; mmu-miR-19b; mmu-miR-148b; mmu-miR-669l; mmu-miR-125a-5p; mmu-miR-148a; mmu-miR-669d; mmu-miR-669f-5p; mmu-miR-720; mmu-miR-125b-5p; mmu-miR-377; mmu-miR-152; …
Padi4	0.259	2	7.72201	mmu-miR-103; mmu-miR-151-5p
Paics	0.695	11	15.8273	mmu-miR-466c-3p; mmu-miR-141; mmu-miR-200a; mmu-miR-142-3p; mmu-miR-145; mmu-miR-543; mmu-miR-1198-3p; mmu-miR-376b; mmu-miR-674; mmu-miR-467f; mmu-miR-466b-3p
Pak6	1.446	38	26.2794	mmu-miR-200a; mmu-miR-495; mmu-miR-29b; mmu-miR-335-5p; mmu-miR-130a; mmu-miR-19a; mmu-miR-130b; mmu-miR-674; mmu-miR-296-5p; mmu-miR-29c; mmu-miR-205; mmu-miR-34a; mmu-miR-27a; mmu-miR-1198-5p; mmu-miR-103; mmu-miR-1983; mmu-miR-421; mmu-miR-19b; mmu-miR-350; mmu-miR-125a-5p; mmu-miR-484; mmu-miR-18b; mmu-miR-125b-5p; mmu-miR-23b; mmu-miR-141; mmu-miR-291b-3p; mmu-miR-330; mmu-miR-34c; mmu-miR-2…
Pam	0.716	27	37.7095	mmu-miR-32; mmu-miR-142-3p; mmu-miR-93; mmu-miR-669d; mmu-miR-363-3p; mmu-miR-20b; mmu-miR-150; mmu-miR-20a; mmu-miR-30d; mmu-miR-741; mmu-miR-30a; mmu-miR-34c; mmu-miR-335-3p; mmu-miR-543; mmu-miR-367; mmu-miR-34a; mmu-miR-22; mmu-miR-106b; mmu-miR-30b; mmu-miR-25; mmu-miR-106a; mmu-miR-17; mmu-miR-129-2-3p; mmu-miR-329; mmu-miR-672; mmu-miR-142-5p; mmu-miR-129-1-3p
Pard6b	1.993	61	30.6071	mmu-miR-495; mmu-miR-93; mmu-miR-200b; mmu-miR-369-3p; mmu-miR-20a; mmu-miR-467f; mmu-miR-466b-3p; mmu-miR-291a-5p; mmu-miR-205; mmu-miR-291b-5p; mmu-let-7a; mmu-miR-132; mmu-miR-27a; mmu-miR-106a; mmu-miR-17; mmu-miR-421; mmu-miR-381; mmu-miR-1952; mmu-let-7g; mmu-miR-195; mmu-miR-350; mmu-miR-148b; mmu-miR-1960; mmu-miR-297c; mmu-miR-669l; mmu-miR-429; mmu-miR-374; mmu-miR-16; mmu-miR-760-5p; m…
Parp1	0.723	22	30.4288	mmu-miR-148b; mmu-miR-124; mmu-miR-760-5p; mmu-miR-466g; mmu-miR-148a; mmu-miR-484; mmu-miR-674; mmu-miR-376c; mmu-miR-434-3p; mmu-miR-152; mmu-miR-134; mmu-miR-543; mmu-miR-103; mmu-miR-129-2-3p; mmu-miR-672; mmu-miR-33; mmu-miR-381; mmu-miR-129-1-3p; mmu-miR-423-5p
Parp12	0.905	21	23.2044	mmu-miR-466a-3p; mmu-miR-302d; mmu-miR-145; mmu-miR-96; mmu-miR-374; mmu-miR-669d; mmu-miR-467c; mmu-miR-295; mmu-miR-467f; mmu-miR-466b-3p; mmu-miR-323-3p; mmu-miR-291b-3p; mmu-miR-466c-3p; mmu-miR-290-3p; mmu-miR-132; mmu-miR-467a; mmu-miR-182; mmu-miR-291a-3p; mmu-miR-292-3p; mmu-miR-302a; mmu-miR-294
Parp14	1.772	27	15.237	mmu-miR-433; mmu-miR-200a; mmu-miR-467e; mmu-miR-29b; mmu-miR-1960; mmu-miR-148b; mmu-miR-466g; mmu-miR-148a; mmu-miR-669d; mmu-miR-484; mmu-miR-674; mmu-miR-466b-3p; mmu-miR-296-5p; mmu-miR-466c-3p; mmu-miR-1196; mmu-miR-141; mmu-miR-152; mmu-miR-1945; mmu-miR-29a; mmu-miR-29c; mmu-miR-760-3p; mmu-miR-132; mmu-miR-467h; mmu-miR-1983; mmu-miR-1935
Parp2	0.106	3	28.3019	mmu-miR-330; mmu-miR-291b-5p; mmu-miR-291a-5p
Parp8	0.366	5	13.6612	mmu-miR-434-3p; mmu-miR-200c; mmu-miR-429; mmu-miR-340-5p; mmu-miR-200b
Parva	5.58	70	12.5448	mmu-miR-200a; mmu-miR-29b; mmu-miR-804; mmu-miR-335-5p; mmu-miR-96; mmu-miR-130a; mmu-miR-200b; mmu-miR-466g; mmu-miR-431; mmu-miR-130b; mmu-miR-150; mmu-miR-674; mmu-miR-28; mmu-miR-181a; mmu-miR-29c; mmu-miR-205; mmu-miR-34a; mmu-miR-191; mmu-miR-468; mmu-miR-1983; mmu-miR-182; mmu-miR-129-2-3p; mmu-miR-129-1-3p; mmu-miR-423-5p; mmu-miR-195; mmu-miR-433; mmu-miR-124; mmu-miR-669l; mmu-miR-429; …
Patl2	0.366	5	13.6612	mmu-miR-1983; mmu-miR-124; mmu-miR-291b-5p; mmu-miR-291a-5p; mmu-miR-191
Patz1	1.402	38	27.1041	mmu-miR-142-3p; mmu-miR-29b; mmu-miR-297c; mmu-miR-429; mmu-miR-96; mmu-miR-136; mmu-miR-200b; mmu-miR-150; mmu-miR-23b; mmu-miR-762; mmu-miR-34c; mmu-miR-330; mmu-miR-181a; mmu-miR-29c; mmu-miR-29a; mmu-miR-760-3p; mmu-miR-134; mmu-miR-34a; mmu-miR-27a; mmu-miR-1198-5p; mmu-miR-191; mmu-miR-1983; mmu-miR-1224; mmu-miR-200c; mmu-miR-26b; mmu-miR-672; mmu-miR-142-5p; mmu-miR-297a; mmu-miR-26a; mmu…
Pawr	0.637	20	31.3972	mmu-miR-142-3p; mmu-miR-467e; mmu-miR-124; mmu-miR-429; mmu-miR-374; mmu-miR-200b; mmu-miR-30d; mmu-miR-377; mmu-miR-30a; mmu-miR-434-3p; mmu-miR-181a; mmu-miR-335-3p; mmu-miR-669f-3p; mmu-miR-30b; mmu-miR-467h; mmu-miR-468; mmu-miR-26b; mmu-miR-200c; mmu-miR-381; mmu-miR-26a
Pbx4	0.792	10	12.6263	mmu-miR-103; mmu-miR-134; mmu-miR-132; mmu-miR-713; mmu-miR-22; mmu-miR-762; mmu-miR-183
Pcdh18	1.971	36	18.2648	mmu-miR-495; mmu-miR-1960; mmu-miR-148b; mmu-miR-145; mmu-miR-124; mmu-miR-429; mmu-miR-200b; mmu-miR-125a-5p; mmu-miR-148a; mmu-miR-669d; mmu-miR-340-5p; mmu-miR-125b-5p; mmu-miR-30d; mmu-miR-30a; mmu-miR-1196; mmu-miR-34c; mmu-miR-330; mmu-miR-152; mmu-miR-543; mmu-miR-34a; mmu-miR-27a; mmu-miR-1198-5p; mmu-miR-30b; mmu-miR-532-5p; mmu-miR-468; mmu-miR-1983; mmu-miR-200c; mmu-miR-33; mmu-miR-14…
Pcdh19	5.128	112	21.8409	mmu-miR-495; mmu-miR-93; mmu-miR-335-5p; mmu-miR-466g; mmu-miR-19a; mmu-miR-20a; mmu-miR-340-5p; mmu-miR-323-3p; mmu-miR-29c; mmu-miR-290-3p; mmu-miR-155; mmu-miR-367; mmu-miR-468; mmu-miR-106a; mmu-miR-17; mmu-miR-292-3p; mmu-miR-466a-3p; mmu-miR-195; mmu-miR-433; mmu-miR-124; mmu-miR-669l; mmu-miR-1198-3p; mmu-miR-669f-5p; mmu-miR-20b; mmu-miR-23b; mmu-miR-1196; mmu-miR-335-3p; mmu-miR-378; mmu…
Pcdh7	1.316	40	30.3951	mmu-miR-200a; mmu-miR-495; mmu-miR-467e; mmu-miR-93; mmu-miR-96; mmu-miR-200b; mmu-miR-466g; mmu-miR-19a; mmu-miR-369-3p; mmu-miR-20a; mmu-miR-323-3p; mmu-miR-669o-5p; mmu-miR-181a; mmu-miR-669f-3p; mmu-miR-543; mmu-miR-467h; mmu-miR-182; mmu-miR-106a; mmu-miR-17; mmu-miR-381; mmu-miR-302a; mmu-miR-19b; mmu-miR-302d; mmu-miR-297c; mmu-miR-429; mmu-miR-20b; mmu-miR-484; mmu-miR-295; mmu-miR-141; m…
Pcdh8	0.596	11	18.4564	mmu-miR-181a; mmu-miR-669f-3p; mmu-miR-382; mmu-miR-1198-5p; mmu-miR-26b; mmu-miR-23b; mmu-miR-26a; mmu-miR-23a; mmu-miR-410; mmu-miR-377
Pcdhb22	3.614	40	11.0681	mmu-miR-466a-3p; mmu-miR-200a; mmu-miR-495; mmu-miR-429; mmu-miR-200b; mmu-miR-125a-5p; mmu-miR-466g; mmu-miR-484; mmu-miR-150; mmu-miR-674; mmu-miR-369-3p; mmu-miR-467f; mmu-miR-340-5p; mmu-miR-23b; mmu-miR-125b-5p; mmu-miR-466b-3p; mmu-miR-30d; mmu-miR-323-3p; mmu-miR-30a; mmu-miR-466c-3p; mmu-miR-1196; mmu-miR-141; mmu-miR-330; mmu-miR-30b; mmu-miR-183; mmu-miR-1224; mmu-miR-200c; mmu-miR-672;…
Pcid2	1.87	28	14.9733	mmu-miR-466a-3p; mmu-miR-200a; mmu-miR-495; mmu-miR-148b; mmu-miR-145; mmu-miR-124; mmu-miR-136; mmu-miR-148a; mmu-miR-150; mmu-miR-467f; mmu-miR-23b; mmu-miR-30d; mmu-miR-30a; mmu-miR-434-3p; mmu-miR-1196; mmu-miR-141; mmu-miR-152; mmu-miR-335-3p; mmu-miR-760-3p; mmu-miR-669f-3p; mmu-miR-22; mmu-miR-30b; mmu-miR-381; mmu-miR-23a
Pcnt	0.485	5	10.3093	mmu-miR-182; mmu-miR-1224; mmu-miR-142-5p; mmu-miR-376c; mmu-miR-28
Pcsk1n	1.307	27	20.658	mmu-miR-302d; mmu-miR-495; mmu-miR-1960; mmu-miR-130a; mmu-miR-760-5p; mmu-miR-467c; mmu-miR-19a; mmu-miR-130b; mmu-miR-295; mmu-miR-101b; mmu-miR-291b-3p; mmu-miR-34c; mmu-miR-290-3p; mmu-miR-34a; mmu-miR-467a; mmu-miR-301a; mmu-miR-103; mmu-miR-291a-3p; mmu-miR-672; mmu-miR-292-3p; mmu-miR-1935; mmu-miR-302a; mmu-miR-19b; mmu-miR-294
Pcsk6	1.337	27	20.1945	mmu-miR-124; mmu-miR-669l; mmu-miR-669f-5p; mmu-miR-484; mmu-miR-674; mmu-miR-720; mmu-miR-340-5p; mmu-miR-762; mmu-miR-376c; mmu-miR-28; mmu-miR-323-3p; mmu-miR-669o-5p; mmu-miR-21; mmu-miR-330; mmu-miR-205; mmu-miR-760-3p; mmu-miR-543; mmu-miR-669a-5p; mmu-miR-27a; mmu-miR-103; mmu-miR-672; mmu-miR-1952; mmu-miR-421; mmu-miR-1935
Pcsk9	1.017	12	11.7994	mmu-miR-142-3p; mmu-miR-205; mmu-miR-760-3p; mmu-miR-134; mmu-miR-713; mmu-miR-125a-5p; mmu-miR-532-5p; mmu-miR-125b-5p; mmu-miR-1952; mmu-miR-23b; mmu-miR-23a
Pde1b	1.258	31	24.6423	mmu-miR-350; mmu-miR-429; mmu-miR-335-5p; mmu-miR-130a; mmu-miR-200b; mmu-miR-125a-5p; mmu-miR-760-5p; mmu-miR-466g; mmu-miR-130b; mmu-miR-150; mmu-miR-674; mmu-miR-125b-5p; mmu-miR-762; mmu-miR-296-5p; mmu-miR-323-3p; mmu-miR-291b-3p; mmu-miR-330; mmu-miR-760-3p; mmu-miR-22; mmu-miR-378; mmu-miR-301a; mmu-miR-1983; mmu-miR-1224; mmu-miR-200c; mmu-miR-423-5p
Pde4dip	2.417	31	12.8258	mmu-miR-195; mmu-miR-495; mmu-miR-350; mmu-miR-124; mmu-miR-130a; mmu-miR-872; mmu-miR-374; mmu-miR-16; mmu-miR-125a-5p; mmu-miR-19a; mmu-miR-130b; mmu-miR-674; mmu-miR-369-3p; mmu-miR-125b-5p; mmu-miR-762; mmu-miR-205; mmu-miR-134; mmu-miR-27a; mmu-miR-15a; mmu-miR-301a; mmu-miR-1198-5p; mmu-miR-193b; mmu-miR-26b; mmu-miR-381; mmu-miR-142-5p; mmu-miR-26a; mmu-miR-15b; mmu-miR-19b
Pde9a	1.539	28	18.1936	mmu-miR-142-3p; mmu-miR-145; mmu-miR-136; mmu-miR-125a-5p; mmu-miR-431; mmu-miR-669d; mmu-miR-125b-5p; mmu-miR-762; mmu-miR-30d; mmu-miR-296-5p; mmu-miR-291a-5p; mmu-miR-377; mmu-miR-30a; mmu-miR-669o-5p; mmu-miR-330; mmu-miR-205; mmu-miR-760-3p; mmu-miR-132; mmu-miR-291b-5p; mmu-miR-22; mmu-miR-382; mmu-miR-30b; mmu-miR-532-5p; mmu-miR-103; mmu-miR-33; mmu-miR-1952; mmu-miR-1935
Pdgfb	1.382	18	13.0246	mmu-miR-669o-5p; mmu-miR-330; mmu-miR-335-3p; mmu-miR-205; mmu-miR-127; mmu-miR-382; mmu-miR-760-5p; mmu-miR-193b; mmu-miR-183; mmu-miR-1198-3p; mmu-miR-129-2-3p; mmu-miR-329; mmu-miR-1952; mmu-miR-129-1-3p; mmu-miR-423-5p
Pdgfc	2.379	50	21.0172	mmu-miR-200a; mmu-miR-29b; mmu-miR-145; mmu-miR-200b; mmu-miR-674; mmu-miR-369-3p; mmu-miR-467f; mmu-miR-291a-5p; mmu-miR-181a; mmu-miR-29c; mmu-miR-669f-3p; mmu-miR-291b-5p; mmu-miR-34a; mmu-miR-103; mmu-miR-381; mmu-miR-154; mmu-miR-1952; mmu-miR-466a-3p; mmu-miR-142-3p; mmu-miR-1960; mmu-miR-350; mmu-miR-429; mmu-miR-872; mmu-miR-374; mmu-miR-669d; mmu-miR-23b; mmu-miR-141; mmu-miR-34c; mmu-mi…
Pdgfra	3.104	79	25.451	mmu-miR-200a; mmu-miR-495; mmu-miR-29b; mmu-miR-145; mmu-miR-93; mmu-miR-335-5p; mmu-miR-96; mmu-miR-130a; mmu-miR-19a; mmu-miR-130b; mmu-miR-150; mmu-miR-369-3p; mmu-miR-20a; mmu-miR-340-5p; mmu-miR-466b-3p; mmu-miR-30d; mmu-miR-30a; mmu-miR-181a; mmu-miR-29c; mmu-miR-205; mmu-miR-669f-3p; mmu-miR-34a; mmu-miR-27a; mmu-miR-30b; mmu-miR-1983; mmu-miR-106a; mmu-miR-182; mmu-miR-17; mmu-miR-26b; mm…
Pdgfrl	0.282	6	21.2766	mmu-miR-466c-3p; mmu-miR-466a-3p; mmu-miR-340-5p; mmu-miR-142-5p; mmu-miR-466b-3p; mmu-miR-382
Pdia6	0.764	36	47.1204	mmu-miR-145; mmu-miR-93; mmu-miR-335-5p; mmu-miR-150; mmu-miR-20a; mmu-miR-181a; mmu-miR-543; mmu-miR-34a; mmu-miR-27a; mmu-miR-106a; mmu-miR-182; mmu-miR-17; mmu-miR-672; mmu-miR-302a; mmu-miR-195; mmu-miR-302d; mmu-miR-466a-3p; mmu-miR-1960; mmu-miR-125a-5p; mmu-miR-16; mmu-miR-374; mmu-miR-669d; mmu-miR-20b; mmu-miR-295; mmu-miR-125b-5p; mmu-miR-23b; mmu-miR-34c; mmu-miR-22; mmu-miR-15a; mmu-m…
Pdk1	3.734	84	22.496	mmu-miR-93; mmu-miR-335-5p; mmu-miR-466g; mmu-miR-431; mmu-miR-467c; mmu-miR-20a; mmu-miR-340-5p; mmu-miR-30d; mmu-miR-30a; mmu-miR-28; mmu-miR-434-3p; mmu-miR-290-3p; mmu-miR-155; mmu-miR-191; mmu-miR-106a; mmu-miR-17; mmu-miR-292-3p; mmu-miR-154; mmu-miR-302a; mmu-miR-302d; mmu-miR-148b; mmu-miR-136; mmu-miR-148a; mmu-miR-20b; mmu-miR-295; mmu-miR-720; mmu-miR-23b; mmu-miR-377; mmu-miR-34c; mmu…
Pdlim3	0.532	9	16.9173	mmu-miR-466c-3p; mmu-miR-134; mmu-miR-429; mmu-miR-96; mmu-miR-200b; mmu-miR-182; mmu-miR-200c; mmu-miR-369-3p; mmu-miR-466b-3p
Pdlim5	3.09	81	26.2136	mmu-miR-93; mmu-miR-804; mmu-miR-96; mmu-miR-130a; mmu-miR-200b; mmu-miR-130b; mmu-miR-150; mmu-miR-369-3p; mmu-miR-20a; mmu-miR-340-5p; mmu-miR-30d; mmu-miR-291a-5p; mmu-miR-30a; mmu-miR-434-3p; mmu-miR-290-3p; mmu-miR-155; mmu-miR-291b-5p; mmu-miR-467a; mmu-miR-30b; mmu-miR-1198-5p; mmu-miR-1983; mmu-miR-182; mmu-miR-106a; mmu-miR-17; mmu-miR-129-2-3p; mmu-miR-292-3p; mmu-miR-129-1-3p; mmu-miR-…
Pdrg1	1.072	26	24.2537	mmu-let-7g; mmu-miR-142-3p; mmu-miR-495; mmu-miR-145; mmu-miR-93; mmu-miR-335-5p; mmu-miR-760-5p; mmu-miR-19a; mmu-miR-20b; mmu-miR-20a; mmu-miR-23b; mmu-miR-762; mmu-let-7c; mmu-miR-34c; mmu-let-7a; mmu-miR-134; mmu-miR-34a; mmu-miR-106b; mmu-miR-106a; mmu-let-7e; mmu-miR-17; mmu-miR-202-3p; mmu-miR-672; mmu-miR-421; mmu-miR-23a; mmu-miR-19b
Pdxk	4.057	58	14.2963	mmu-miR-713; mmu-miR-467c; mmu-miR-19a; mmu-miR-674; mmu-miR-467f; mmu-miR-434-3p; mmu-miR-543; mmu-miR-34a; mmu-miR-1198-5p; mmu-miR-468; mmu-miR-1983; mmu-miR-672; mmu-miR-1952; mmu-miR-423-5p; mmu-miR-19b; mmu-miR-148b; mmu-miR-1960; mmu-miR-297c; mmu-miR-350; mmu-miR-136; mmu-miR-872; mmu-miR-125a-5p; mmu-miR-760-5p; mmu-miR-148a; mmu-miR-669d; mmu-miR-484; mmu-miR-125b-5p; mmu-miR-762; mmu-m…
Pdyn	1.436	30	20.8914	mmu-miR-669a-3p; mmu-miR-32; mmu-miR-200a; mmu-miR-713; mmu-miR-136; mmu-miR-374; mmu-miR-669d; mmu-miR-363-3p; mmu-miR-674; mmu-miR-369-3p; mmu-miR-23b; mmu-miR-762; mmu-miR-141; mmu-miR-330; mmu-miR-205; mmu-miR-367; mmu-miR-669o-3p; mmu-miR-1198-5p; mmu-miR-541; mmu-miR-25; mmu-miR-1983; mmu-miR-129-2-3p; mmu-miR-26b; mmu-miR-1952; mmu-miR-142-5p; mmu-miR-129-1-3p; mmu-miR-26a; mmu-miR-23a; mm…
Pdzrn3	0.903	41	45.4042	mmu-miR-467e; mmu-miR-93; mmu-miR-467c; mmu-miR-20a; mmu-miR-466b-3p; mmu-miR-21; mmu-miR-290-3p; mmu-miR-543; mmu-miR-467a; mmu-miR-27a; mmu-miR-1198-5p; mmu-miR-467h; mmu-miR-106a; mmu-miR-103; mmu-miR-17; mmu-miR-26b; mmu-miR-421; mmu-miR-381; mmu-miR-292-3p; mmu-miR-302a; mmu-miR-195; mmu-miR-302d; mmu-miR-433; mmu-miR-16; mmu-miR-669d; mmu-miR-20b; mmu-miR-295; mmu-miR-291b-3p; mmu-miR-466c-…
Pea15a	1.898	28	14.7524	mmu-let-7g; mmu-miR-145; mmu-miR-124; mmu-miR-713; mmu-miR-96; mmu-miR-760-5p; mmu-miR-466g; mmu-miR-431; mmu-miR-674; mmu-miR-30d; mmu-let-7c; mmu-miR-741; mmu-miR-30a; mmu-miR-28; mmu-miR-330; mmu-let-7a; mmu-miR-134; mmu-miR-27a; mmu-miR-30b; mmu-let-7e; mmu-miR-202-3p; mmu-miR-672; mmu-miR-1935; mmu-miR-466f; mmu-miR-423-5p
Pex1	0.431	10	23.2019	mmu-miR-141; mmu-miR-200a; mmu-miR-495; mmu-miR-350; mmu-miR-713; mmu-miR-423-3p; mmu-miR-18b; mmu-miR-23b; mmu-miR-23a; mmu-miR-28
Pex11c	2.095	19	9.06921	mmu-miR-291b-3p; mmu-miR-330; mmu-miR-21; mmu-miR-467e; mmu-miR-335-3p; mmu-miR-291b-5p; mmu-miR-713; mmu-miR-467h; mmu-miR-431; mmu-miR-193b; mmu-miR-669d; mmu-miR-541; mmu-miR-674; mmu-miR-421; mmu-miR-23b; mmu-miR-23a; mmu-miR-291a-5p
Pex14	0.806	19	23.5732	mmu-miR-1960; mmu-miR-148b; mmu-miR-125a-5p; mmu-miR-431; mmu-miR-148a; mmu-miR-150; mmu-miR-674; mmu-miR-720; mmu-miR-125b-5p; mmu-miR-762; mmu-miR-377; mmu-miR-28; mmu-miR-152; mmu-miR-760-3p; mmu-miR-468; mmu-miR-1935
Pfas	2.266	35	15.4457	mmu-miR-495; mmu-miR-29b; mmu-miR-713; mmu-miR-335-5p; mmu-miR-340-5p; mmu-miR-434-3p; mmu-miR-669o-5p; mmu-miR-29c; mmu-miR-205; mmu-miR-543; mmu-miR-1198-5p; mmu-miR-302a; mmu-miR-195; mmu-miR-302d; mmu-miR-433; mmu-miR-297c; mmu-miR-16; mmu-miR-484; mmu-miR-295; mmu-miR-23b; mmu-miR-101b; mmu-miR-127; mmu-miR-29a; mmu-miR-15a; mmu-miR-193b; mmu-miR-291a-3p; mmu-miR-33; mmu-miR-297a; mmu-miR-19…
Pfn2	1.322	25	18.9107	mmu-miR-142-3p; mmu-miR-145; mmu-miR-124; mmu-miR-93; mmu-miR-872; mmu-miR-466g; mmu-miR-431; mmu-miR-669d; mmu-miR-20b; mmu-miR-20a; mmu-miR-18b; mmu-miR-291b-3p; mmu-miR-335-3p; mmu-miR-134; mmu-miR-106b; mmu-miR-183; mmu-miR-376b; mmu-miR-106a; mmu-miR-103; mmu-miR-17; mmu-miR-154; mmu-miR-33
Phc1	3.21	87	27.1028	mmu-miR-29b; mmu-miR-145; mmu-miR-93; mmu-miR-804; mmu-miR-335-5p; mmu-miR-466g; mmu-miR-19a; mmu-miR-150; mmu-miR-674; mmu-miR-20a; mmu-miR-291a-5p; mmu-miR-28; mmu-miR-669o-5p; mmu-miR-29c; mmu-miR-205; mmu-miR-367; mmu-miR-291b-5p; mmu-miR-34a; mmu-miR-106a; mmu-miR-103; mmu-miR-129-2-3p; mmu-miR-17; mmu-miR-154; mmu-miR-129-1-3p; mmu-miR-19b; mmu-miR-195; mmu-miR-32; mmu-miR-124; mmu-miR-1960…
Phf19	1.962	26	13.2518	mmu-miR-200a; mmu-miR-136; mmu-miR-872; mmu-miR-374; mmu-miR-125a-5p; mmu-miR-760-5p; mmu-miR-674; mmu-miR-18b; mmu-miR-125b-5p; mmu-miR-296-5p; mmu-miR-377; mmu-miR-141; mmu-miR-330; mmu-miR-22; mmu-miR-378; mmu-miR-376b; mmu-miR-103; mmu-miR-129-2-3p; mmu-miR-1224; mmu-miR-154; mmu-miR-129-1-3p; mmu-miR-292-5p; mmu-miR-423-5p
Phlda2	0.271	1	3.69004	mmu-miR-335-3p
Pik3r3	3.224	79	24.5037	mmu-miR-495; mmu-miR-29b; mmu-miR-713; mmu-miR-96; mmu-miR-466g; mmu-miR-19a; mmu-miR-466b-3p; mmu-miR-296-5p; mmu-miR-291a-5p; mmu-miR-323-3p; mmu-miR-434-3p; mmu-miR-181a; mmu-miR-29c; mmu-miR-367; mmu-miR-291b-5p; mmu-miR-34a; mmu-miR-27a; mmu-miR-541; mmu-miR-468; mmu-miR-103; mmu-miR-182; mmu-miR-26b; mmu-miR-421; mmu-miR-302a; mmu-miR-19b; mmu-miR-32; mmu-miR-302d; mmu-miR-195; mmu-miR-142-…
Pipox	0.509	5	9.82318	mmu-miR-484; mmu-miR-150; mmu-miR-340-5p; mmu-miR-762; mmu-miR-423-5p
Pitpna	2.709	78	28.7929	mmu-miR-29b; mmu-miR-93; mmu-miR-431; mmu-miR-150; mmu-miR-369-3p; mmu-miR-20a; mmu-miR-340-5p; mmu-miR-466b-3p; mmu-miR-30d; mmu-miR-30a; mmu-miR-28; mmu-miR-21; mmu-miR-29c; mmu-miR-367; mmu-miR-34a; mmu-miR-30b; mmu-miR-541; mmu-miR-106a; mmu-miR-103; mmu-miR-17; mmu-miR-421; mmu-miR-1952; mmu-miR-302a; mmu-miR-423-5p; mmu-miR-32; mmu-miR-302d; mmu-miR-195; mmu-miR-350; mmu-miR-124; mmu-miR-19…
Pitpnm2	2.573	54	20.9872	mmu-miR-145; mmu-miR-93; mmu-miR-713; mmu-miR-130a; mmu-miR-431; mmu-miR-130b; mmu-miR-150; mmu-miR-20a; mmu-miR-340-5p; mmu-miR-30d; mmu-miR-296-5p; mmu-miR-323-3p; mmu-miR-30a; mmu-miR-155; mmu-miR-34a; mmu-miR-27a; mmu-miR-30b; mmu-miR-1983; mmu-miR-106a; mmu-miR-17; mmu-miR-1952; mmu-miR-148b; mmu-miR-1960; mmu-miR-136; mmu-miR-760-5p; mmu-miR-1198-3p; mmu-miR-148a; mmu-miR-20b; mmu-miR-18b; …
Pitrm1	0.396	6	15.1515	mmu-miR-669d; mmu-miR-466a-3p; mmu-miR-467e; mmu-miR-205; mmu-miR-155; mmu-miR-467h
Pitx1	1.018	20	19.6464	mmu-miR-195; mmu-miR-330; mmu-miR-297c; mmu-miR-713; mmu-miR-1893; mmu-miR-382; mmu-miR-15a; mmu-miR-16; mmu-miR-674; mmu-miR-340-5p; mmu-miR-1952; mmu-miR-296-5p; mmu-miR-297a; mmu-miR-15b; mmu-miR-423-5p
Pitx2	1.129	29	25.6864	mmu-miR-466a-3p; mmu-miR-200a; mmu-miR-374; mmu-miR-484; mmu-miR-150; mmu-miR-369-3p; mmu-miR-467f; mmu-miR-340-5p; mmu-miR-376c; mmu-miR-291a-5p; mmu-miR-487b; mmu-miR-377; mmu-miR-141; mmu-miR-181a; mmu-miR-21; mmu-miR-127; mmu-miR-335-3p; mmu-miR-669f-3p; mmu-miR-291b-5p; mmu-miR-193b; mmu-miR-376b; mmu-miR-26b; mmu-miR-1935; mmu-miR-26a
Pkdcc	0.793	26	32.7869	mmu-miR-32; mmu-miR-195; mmu-miR-350; mmu-miR-1960; mmu-miR-136; mmu-miR-16; mmu-miR-1198-3p; mmu-miR-363-3p; mmu-miR-674; mmu-miR-23b; mmu-miR-762; mmu-miR-741; mmu-miR-28; mmu-miR-330; mmu-miR-181a; mmu-miR-543; mmu-miR-367; mmu-miR-15a; mmu-miR-25; mmu-miR-103; mmu-miR-1935; mmu-miR-15b; mmu-miR-23a; mmu-miR-292-5p
Pkmyt1	0.123	3	24.3902	mmu-miR-29c; mmu-miR-29b; mmu-miR-29a
Pla2g10	0.497	17	34.2052	mmu-miR-302d; mmu-miR-136; mmu-miR-130a; mmu-miR-484; mmu-miR-130b; mmu-miR-150; mmu-miR-295; mmu-miR-467f; mmu-miR-151-5p; mmu-miR-28; mmu-miR-291b-3p; mmu-miR-543; mmu-miR-301a; mmu-miR-291a-3p; mmu-miR-381; mmu-miR-302a; mmu-miR-294
Pla2g2c	2.37	23	9.70464	mmu-miR-1960; mmu-miR-148b; mmu-miR-335-5p; mmu-miR-136; mmu-miR-130a; mmu-miR-125a-5p; mmu-miR-431; mmu-miR-148a; mmu-miR-19a; mmu-miR-130b; mmu-miR-125b-5p; mmu-miR-762; mmu-miR-296-5p; mmu-miR-323-3p; mmu-miR-152; mmu-miR-293; mmu-miR-301a; mmu-miR-468; mmu-miR-1952; mmu-miR-292-5p; mmu-miR-19b
Pla2g4a	0.443	11	24.8307	mmu-miR-669o-5p; mmu-miR-669f-3p; mmu-miR-543; mmu-miR-429; mmu-miR-382; mmu-miR-200b; mmu-miR-1198-5p; mmu-miR-200c; mmu-miR-23b; mmu-miR-23a; mmu-miR-410
Pla2g4b	4.34	74	17.0507	mmu-miR-29b; mmu-miR-145; mmu-miR-93; mmu-miR-713; mmu-miR-200b; mmu-miR-431; mmu-miR-20a; mmu-miR-296-5p; mmu-miR-291a-5p; mmu-miR-28; mmu-miR-669o-5p; mmu-miR-181a; mmu-miR-29c; mmu-miR-290-3p; mmu-miR-543; mmu-miR-291b-5p; mmu-miR-669o-3p; mmu-miR-467a; mmu-miR-27a; mmu-miR-106a; mmu-miR-103; mmu-miR-1983; mmu-miR-17; mmu-miR-672; mmu-miR-292-3p; mmu-miR-669a-3p; mmu-miR-142-3p; mmu-miR-429; m…
Pla2g5	1.296	20	15.4321	mmu-miR-29b; mmu-miR-431; mmu-miR-340-5p; mmu-miR-762; mmu-miR-296-5p; mmu-miR-330; mmu-miR-34c; mmu-miR-205; mmu-miR-29a; mmu-miR-29c; mmu-miR-335-3p; mmu-miR-760-3p; mmu-miR-34a; mmu-miR-382; mmu-miR-532-5p; mmu-miR-421; mmu-miR-1935
Plagl1	2.59	69	26.6409	mmu-miR-195; mmu-miR-142-3p; mmu-miR-145; mmu-miR-96; mmu-miR-872; mmu-miR-16; mmu-miR-125a-5p; mmu-miR-466g; mmu-miR-150; mmu-miR-369-3p; mmu-miR-340-5p; mmu-miR-23b; mmu-miR-125b-5p; mmu-miR-466b-3p; mmu-miR-376c; mmu-miR-291a-5p; mmu-miR-101b; mmu-miR-466c-3p; mmu-miR-669f-3p; mmu-miR-291b-5p; mmu-miR-15a; mmu-miR-27a; mmu-miR-468; mmu-miR-329; mmu-miR-381; mmu-miR-154; mmu-miR-142-5p; mmu-miR…
Plcg1	2.702	47	17.3945	mmu-miR-804; mmu-miR-674; mmu-miR-291a-5p; mmu-miR-669o-5p; mmu-miR-181a; mmu-miR-291b-5p; mmu-miR-34a; mmu-miR-541; mmu-miR-103; mmu-miR-154; mmu-miR-1952; mmu-miR-423-5p; mmu-miR-466a-3p; mmu-miR-124; mmu-miR-1960; mmu-miR-136; mmu-miR-760-5p; mmu-miR-484; mmu-miR-23b; mmu-miR-720; mmu-miR-376c; mmu-miR-762; mmu-miR-101b; mmu-miR-330; mmu-miR-34c; mmu-miR-335-3p; mmu-miR-760-3p; mmu-miR-293; mm…
Plekhb2	2.533	64	25.2665	mmu-miR-200a; mmu-miR-495; mmu-miR-713; mmu-miR-431; mmu-miR-467c; mmu-miR-674; mmu-miR-340-5p; mmu-miR-466b-3p; mmu-miR-296-5p; mmu-miR-291a-5p; mmu-miR-28; mmu-miR-181a; mmu-miR-290-3p; mmu-miR-543; mmu-miR-291b-5p; mmu-let-7a; mmu-miR-669o-3p; mmu-miR-34a; mmu-miR-467a; mmu-miR-541; mmu-miR-182; mmu-miR-202-3p; mmu-miR-421; mmu-miR-292-3p; mmu-miR-1952; mmu-miR-302a; mmu-miR-669a-3p; mmu-let-7…
Plekhn1	0.323	10	30.9598	mmu-miR-195; mmu-miR-760-3p; mmu-miR-134; mmu-miR-378; mmu-miR-15a; mmu-miR-16; mmu-miR-484; mmu-miR-15b; mmu-miR-323-3p; mmu-miR-423-5p
Plekho2	1.692	33	19.5035	mmu-miR-142-3p; mmu-miR-148b; mmu-miR-335-5p; mmu-miR-96; mmu-miR-125a-5p; mmu-miR-431; mmu-miR-148a; mmu-miR-484; mmu-miR-125b-5p; mmu-miR-762; mmu-miR-30d; mmu-miR-30a; mmu-miR-669o-5p; mmu-miR-330; mmu-miR-152; mmu-miR-181a; mmu-miR-205; mmu-miR-760-3p; mmu-miR-132; mmu-miR-30b; mmu-miR-532-5p; mmu-miR-183; mmu-miR-193b; mmu-miR-103; mmu-miR-182; mmu-miR-1983; mmu-miR-1935; mmu-miR-292-5p; mmu…
Plk1	0.285	17	59.6491	mmu-miR-148b; mmu-miR-713; mmu-miR-148a; mmu-miR-1198-3p; mmu-miR-484; mmu-miR-467f; mmu-miR-340-5p; mmu-miR-762; mmu-miR-30d; mmu-miR-741; mmu-miR-30a; mmu-miR-152; mmu-miR-30b; mmu-miR-329; mmu-miR-142-5p; mmu-miR-381; mmu-miR-410
Plk2	0.62	8	12.9032	mmu-miR-200c; mmu-miR-429; mmu-miR-421; mmu-miR-126-3p; mmu-miR-27a; mmu-miR-200b
Plxdc1	1.25	25	20	mmu-miR-200a; mmu-miR-1960; mmu-miR-148b; mmu-miR-145; mmu-miR-335-5p; mmu-miR-125a-5p; mmu-miR-760-5p; mmu-miR-431; mmu-miR-148a; mmu-miR-674; mmu-miR-125b-5p; mmu-miR-141; mmu-miR-152; mmu-miR-205; mmu-miR-129-2-3p; mmu-miR-1952; mmu-miR-33; mmu-miR-129-1-3p; mmu-miR-1935
Plxdc2	4.532	110	24.2718	mmu-miR-495; mmu-miR-145; mmu-miR-93; mmu-miR-335-5p; mmu-miR-96; mmu-miR-466g; mmu-miR-431; mmu-miR-19a; mmu-miR-20a; mmu-miR-340-5p; mmu-miR-30d; mmu-miR-323-3p; mmu-miR-30a; mmu-miR-434-3p; mmu-miR-21; mmu-miR-367; mmu-miR-191; mmu-miR-541; mmu-miR-468; mmu-miR-106a; mmu-miR-17; mmu-miR-302a; mmu-miR-466a-3p; mmu-miR-302d; mmu-miR-195; mmu-miR-669l; mmu-miR-1198-3p; mmu-miR-669f-5p; mmu-miR-20…
Plxna1	3.06	62	20.2614	mmu-miR-200a; mmu-miR-29b; mmu-miR-145; mmu-miR-335-5p; mmu-miR-296-5p; mmu-miR-29c; mmu-miR-290-3p; mmu-miR-155; mmu-miR-34a; mmu-miR-1893; mmu-miR-467a; mmu-miR-468; mmu-miR-1983; mmu-miR-182; mmu-miR-129-2-3p; mmu-miR-26b; mmu-miR-292-3p; mmu-miR-129-1-3p; mmu-miR-423-5p; mmu-miR-195; mmu-miR-148b; mmu-miR-1960; mmu-miR-374; mmu-miR-16; mmu-miR-760-5p; mmu-miR-148a; mmu-miR-669d; mmu-miR-484; …
Plxna2	4.708	118	25.0637	mmu-miR-495; mmu-miR-145; mmu-miR-804; mmu-miR-96; mmu-miR-466g; mmu-miR-431; mmu-miR-19a; mmu-miR-340-5p; mmu-miR-30d; mmu-miR-296-5p; mmu-miR-30a; mmu-miR-21; mmu-miR-290-3p; mmu-miR-669f-3p; mmu-let-7a; mmu-miR-468; mmu-miR-672; mmu-miR-292-3p; mmu-miR-669a-3p; mmu-miR-466a-3p; mmu-let-7g; mmu-miR-195; mmu-miR-433; mmu-miR-669l; mmu-miR-136; mmu-miR-125a-5p; mmu-miR-760-5p; mmu-miR-1198-3p; mm…
Pmaip1	2.177	29	13.3211	mmu-miR-466a-3p; mmu-let-7g; mmu-miR-142-3p; mmu-miR-145; mmu-miR-96; mmu-miR-872; mmu-miR-23b; mmu-miR-30d; mmu-let-7c; mmu-miR-30a; mmu-miR-181a; mmu-miR-155; mmu-miR-205; mmu-miR-335-3p; mmu-miR-543; mmu-let-7a; mmu-miR-30b; mmu-let-7e; mmu-miR-182; mmu-miR-202-3p; mmu-miR-23a; mmu-miR-292-5p; mmu-miR-410
Pnma2	2.828	43	15.2051	mmu-miR-200a; mmu-miR-495; mmu-miR-335-5p; mmu-miR-130a; mmu-miR-130b; mmu-miR-674; mmu-miR-340-5p; mmu-miR-30d; mmu-miR-323-3p; mmu-miR-30a; mmu-miR-543; mmu-let-7a; mmu-miR-132; mmu-miR-30b; mmu-miR-1198-5p; mmu-miR-129-2-3p; mmu-miR-26b; mmu-miR-672; mmu-miR-129-1-3p; mmu-miR-423-5p; mmu-let-7g; mmu-miR-142-3p; mmu-miR-350; mmu-miR-669l; mmu-miR-669f-5p; mmu-miR-484; mmu-miR-23b; mmu-let-7c; m…
Pno1	0.736	20	27.1739	mmu-miR-467e; mmu-miR-429; mmu-miR-872; mmu-miR-374; mmu-miR-200b; mmu-miR-466g; mmu-miR-150; mmu-miR-369-3p; mmu-miR-340-5p; mmu-miR-23b; mmu-miR-181a; mmu-miR-335-3p; mmu-miR-134; mmu-miR-467h; mmu-miR-200c; mmu-miR-1935; mmu-miR-292-5p; mmu-miR-23a; mmu-miR-410
Podxl	3.534	78	22.0713	mmu-miR-495; mmu-miR-93; mmu-miR-804; mmu-miR-713; mmu-miR-335-5p; mmu-miR-466g; mmu-miR-150; mmu-miR-674; mmu-miR-20a; mmu-miR-340-5p; mmu-miR-28; mmu-miR-434-3p; mmu-miR-21; mmu-miR-181a; mmu-miR-290-3p; mmu-miR-367; mmu-miR-467a; mmu-miR-27a; mmu-miR-106a; mmu-miR-182; mmu-miR-17; mmu-miR-26b; mmu-miR-421; mmu-miR-381; mmu-miR-292-3p; mmu-miR-154; mmu-miR-423-5p; mmu-miR-32; mmu-miR-195; mmu-m…
Pofut2	0.906	13	14.3488	mmu-miR-669o-5p; mmu-miR-34c; mmu-miR-330; mmu-miR-152; mmu-miR-1960; mmu-miR-148b; mmu-miR-713; mmu-miR-34a; mmu-miR-378; mmu-miR-1198-5p; mmu-miR-148a; mmu-miR-1935; mmu-miR-741
Pola1	0.904	29	32.0796	mmu-miR-350; mmu-miR-1960; mmu-miR-148b; mmu-miR-148a; mmu-miR-467f; mmu-miR-340-5p; mmu-miR-23b; mmu-miR-291a-5p; mmu-miR-101b; mmu-miR-152; mmu-miR-181a; mmu-miR-335-3p; mmu-miR-543; mmu-miR-291b-5p; mmu-miR-22; mmu-miR-183; mmu-miR-193b; mmu-miR-541; mmu-miR-1224; mmu-miR-672; mmu-miR-421; mmu-miR-142-5p; mmu-miR-23a
Pold1	0.272	8	29.4118	mmu-miR-134; mmu-miR-378; mmu-miR-125a-5p; mmu-miR-532-5p; mmu-miR-1224; mmu-miR-125b-5p; mmu-miR-18b; mmu-miR-466f
Pold2	0.078	2	25.641	mmu-miR-335-3p; mmu-miR-27a
Pold3	1.541	28	18.17	mmu-miR-195; mmu-miR-142-3p; mmu-miR-669l; mmu-miR-16; mmu-miR-760-5p; mmu-miR-669d; mmu-miR-669f-5p; mmu-miR-484; mmu-miR-674; mmu-miR-340-5p; mmu-miR-762; mmu-miR-34c; mmu-miR-34a; mmu-miR-669a-5p; mmu-miR-15a; mmu-miR-378; mmu-miR-1198-5p; mmu-miR-1983; mmu-miR-672; mmu-miR-1952; mmu-miR-142-5p; mmu-miR-15b
Pole3	1.581	41	25.933	mmu-miR-29b; mmu-miR-93; mmu-miR-130a; mmu-miR-466g; mmu-miR-130b; mmu-miR-150; mmu-miR-20a; mmu-miR-28; mmu-miR-669o-5p; mmu-miR-29c; mmu-miR-155; mmu-miR-543; mmu-miR-669o-3p; mmu-miR-1983; mmu-miR-106a; mmu-miR-17; mmu-miR-669a-3p; mmu-miR-148b; mmu-miR-1960; mmu-miR-136; mmu-miR-125a-5p; mmu-miR-1198-3p; mmu-miR-148a; mmu-miR-484; mmu-miR-20b; mmu-miR-125b-5p; mmu-miR-18b; mmu-miR-376c; mmu-m…
Polr3g	2.193	55	25.0798	mmu-miR-495; mmu-miR-29b; mmu-miR-145; mmu-miR-804; mmu-miR-200b; mmu-miR-30d; mmu-miR-291a-5p; mmu-miR-30a; mmu-miR-28; mmu-miR-29c; mmu-miR-132; mmu-miR-291b-5p; mmu-miR-34a; mmu-miR-27a; mmu-miR-30b; mmu-miR-1983; mmu-miR-1952; mmu-miR-433; mmu-miR-1960; mmu-miR-297c; mmu-miR-350; mmu-miR-669l; mmu-miR-429; mmu-miR-125a-5p; mmu-miR-374; mmu-miR-669d; mmu-miR-669f-5p; mmu-miR-125b-5p; mmu-miR-7…
Pon3	1.782	37	20.7632	mmu-miR-200a; mmu-miR-467e; mmu-miR-350; mmu-miR-29b; mmu-miR-297c; mmu-miR-145; mmu-miR-335-5p; mmu-miR-96; mmu-miR-125a-5p; mmu-miR-1198-3p; mmu-miR-23b; mmu-miR-125b-5p; mmu-miR-762; mmu-miR-141; mmu-miR-669o-5p; mmu-miR-330; mmu-miR-181a; mmu-miR-29c; mmu-miR-29a; mmu-miR-760-3p; mmu-miR-543; mmu-miR-382; mmu-miR-378; mmu-miR-27a; mmu-miR-191; mmu-miR-467h; mmu-miR-541; mmu-miR-182; mmu-miR-2…
Porcn	2.205	25	11.3379	mmu-miR-200a; mmu-miR-1960; mmu-miR-148b; mmu-miR-136; mmu-miR-148a; mmu-miR-669d; mmu-miR-150; mmu-miR-23b; mmu-miR-762; mmu-miR-296-5p; mmu-miR-434-3p; mmu-miR-141; mmu-miR-152; mmu-miR-330; mmu-miR-335-3p; mmu-miR-22; mmu-miR-382; mmu-miR-532-5p; mmu-miR-183; mmu-miR-1983; mmu-miR-23a
Pou4f1	2.913	56	19.2242	mmu-miR-804; mmu-miR-335-5p; mmu-miR-19a; mmu-miR-674; mmu-miR-369-3p; mmu-miR-30d; mmu-miR-291a-5p; mmu-miR-30a; mmu-miR-543; mmu-miR-291b-5p; mmu-miR-34a; mmu-miR-27a; mmu-miR-30b; mmu-miR-1198-5p; mmu-miR-191; mmu-miR-541; mmu-miR-468; mmu-miR-103; mmu-miR-202-3p; mmu-miR-26b; mmu-miR-19b; mmu-miR-297c; mmu-miR-350; mmu-miR-669l; mmu-miR-374; mmu-miR-1198-3p; mmu-miR-669f-5p; mmu-miR-18b; mmu-…
Pou5f1	0.221	7	31.6742	mmu-miR-669f-5p; mmu-miR-484; mmu-miR-674; mmu-miR-669l; mmu-miR-669a-5p; mmu-miR-421; mmu-miR-762
Ppap2b	1.742	44	25.2583	mmu-miR-200b; mmu-miR-19a; mmu-miR-467f; mmu-miR-466b-3p; mmu-miR-291a-5p; mmu-miR-669o-5p; mmu-miR-181a; mmu-miR-290-3p; mmu-miR-291b-5p; mmu-miR-34a; mmu-miR-467a; mmu-miR-27a; mmu-miR-1198-5p; mmu-miR-191; mmu-miR-103; mmu-miR-129-2-3p; mmu-miR-292-3p; mmu-miR-1952; mmu-miR-129-1-3p; mmu-miR-423-5p; mmu-miR-19b; mmu-miR-195; mmu-miR-297c; mmu-miR-350; mmu-miR-669l; mmu-miR-429; mmu-miR-16; mmu…
Ppat	3.386	90	26.58	mmu-miR-200b; mmu-miR-431; mmu-miR-19a; mmu-miR-467f; mmu-miR-340-5p; mmu-miR-466b-3p; mmu-miR-30d; mmu-miR-30a; mmu-miR-434-3p; mmu-miR-205; mmu-miR-669f-3p; mmu-miR-543; mmu-miR-367; mmu-miR-34a; mmu-miR-27a; mmu-miR-30b; mmu-miR-1198-5p; mmu-miR-191; mmu-miR-468; mmu-miR-103; mmu-miR-672; mmu-miR-154; mmu-miR-302a; mmu-miR-423-5p; mmu-miR-19b; mmu-miR-466a-3p; mmu-miR-302d; mmu-miR-32; mmu-miR…
Ppfibp1	1.625	45	27.6923	mmu-miR-200a; mmu-miR-495; mmu-miR-93; mmu-miR-96; mmu-miR-200b; mmu-miR-369-3p; mmu-miR-20a; mmu-miR-467f; mmu-miR-340-5p; mmu-miR-30d; mmu-miR-296-5p; mmu-miR-323-3p; mmu-miR-30a; mmu-miR-669f-3p; mmu-miR-132; mmu-miR-30b; mmu-miR-106a; mmu-miR-182; mmu-miR-1983; mmu-miR-17; mmu-miR-129-2-3p; mmu-miR-26b; mmu-miR-421; mmu-miR-129-1-3p; mmu-miR-350; mmu-miR-429; mmu-miR-669d; mmu-miR-20b; mmu-mi…
Ppig	3.63	77	21.2121	mmu-miR-200a; mmu-miR-495; mmu-miR-467e; mmu-miR-200b; mmu-miR-466g; mmu-miR-19a; mmu-miR-150; mmu-miR-467f; mmu-miR-340-5p; mmu-miR-466b-3p; mmu-miR-30d; mmu-miR-291a-5p; mmu-miR-323-3p; mmu-miR-30a; mmu-miR-28; mmu-miR-21; mmu-miR-155; mmu-miR-669f-3p; mmu-miR-291b-5p; mmu-miR-132; mmu-miR-27a; mmu-miR-30b; mmu-miR-1198-5p; mmu-miR-467h; mmu-miR-541; mmu-miR-103; mmu-miR-26b; mmu-miR-421; mmu-m…
Ppm1a	1.199	24	20.0167	mmu-miR-195; mmu-miR-433; mmu-miR-350; mmu-miR-145; mmu-miR-669l; mmu-miR-16; mmu-miR-431; mmu-miR-669f-5p; mmu-miR-674; mmu-miR-466b-3p; mmu-miR-377; mmu-miR-151-5p; mmu-miR-466c-3p; mmu-miR-181a; mmu-miR-34c; mmu-miR-669f-3p; mmu-miR-132; mmu-miR-669a-5p; mmu-miR-34a; mmu-miR-15a; mmu-miR-421; mmu-miR-292-5p; mmu-miR-15b; mmu-miR-466f
Ppm1f	3.342	59	17.6541	mmu-miR-467e; mmu-miR-713; mmu-miR-335-5p; mmu-miR-96; mmu-miR-200b; mmu-miR-466g; mmu-miR-431; mmu-miR-674; mmu-miR-369-3p; mmu-miR-296-5p; mmu-miR-205; mmu-miR-155; mmu-let-7a; mmu-miR-34a; mmu-miR-467h; mmu-miR-541; mmu-miR-182; mmu-miR-1983; mmu-miR-26b; mmu-miR-202-3p; mmu-miR-421; mmu-miR-1952; mmu-let-7g; mmu-miR-124; mmu-miR-429; mmu-miR-125a-5p; mmu-miR-760-5p; mmu-miR-669d; mmu-miR-125b…
Ppp1r13l	0.528	15	28.4091	mmu-miR-205; mmu-miR-124; mmu-miR-130a; mmu-miR-30b; mmu-miR-301a; mmu-miR-1198-3p; mmu-miR-130b; mmu-miR-340-5p; mmu-miR-142-5p; mmu-miR-762; mmu-miR-30d; mmu-miR-377; mmu-miR-30a
Ppp1r1a	0.665	8	12.0301	mmu-miR-291b-3p; mmu-miR-141; mmu-miR-200a; mmu-miR-205; mmu-miR-150; mmu-miR-125b-5p; mmu-miR-125a-5p; mmu-miR-760-5p
Ppp2r2c	2.436	71	29.1461	mmu-miR-495; mmu-miR-29b; mmu-miR-93; mmu-miR-713; mmu-miR-200b; mmu-miR-466g; mmu-miR-19a; mmu-miR-674; mmu-miR-369-3p; mmu-miR-20a; mmu-miR-30d; mmu-miR-291a-5p; mmu-miR-30a; mmu-miR-29c; mmu-miR-543; mmu-miR-291b-5p; mmu-miR-34a; mmu-miR-30b; mmu-miR-1198-5p; mmu-miR-468; mmu-miR-106a; mmu-miR-1983; mmu-miR-17; mmu-miR-421; mmu-miR-19b; mmu-miR-195; mmu-miR-350; mmu-miR-429; mmu-miR-136; mmu-m…
Ppp3r1	2.069	65	31.4161	mmu-miR-200a; mmu-miR-495; mmu-miR-93; mmu-miR-713; mmu-miR-96; mmu-miR-466g; mmu-miR-674; mmu-miR-369-3p; mmu-miR-20a; mmu-miR-340-5p; mmu-miR-466b-3p; mmu-miR-30d; mmu-miR-30a; mmu-miR-669o-5p; mmu-miR-181a; mmu-miR-205; mmu-miR-543; mmu-miR-132; mmu-miR-27a; mmu-miR-30b; mmu-miR-468; mmu-miR-106a; mmu-miR-103; mmu-miR-182; mmu-miR-17; mmu-miR-26b; mmu-miR-421; mmu-miR-154; mmu-miR-1952; mmu-mi…
Ppp4r4	0.999	19	19.019	mmu-miR-350; mmu-miR-335-3p; mmu-miR-205; mmu-miR-713; mmu-miR-30b; mmu-miR-329; mmu-miR-340-5p; mmu-miR-23b; mmu-miR-33; mmu-miR-30d; mmu-miR-23a; mmu-miR-101b; mmu-miR-30a
Ppp6c	2.987	81	27.1175	mmu-miR-145; mmu-miR-93; mmu-miR-467c; mmu-miR-20a; mmu-miR-30d; mmu-miR-323-3p; mmu-miR-30a; mmu-miR-434-3p; mmu-miR-21; mmu-miR-290-3p; mmu-miR-669f-3p; mmu-miR-468; mmu-miR-106a; mmu-miR-17; mmu-miR-292-3p; mmu-miR-154; mmu-miR-302a; mmu-miR-302d; mmu-miR-195; mmu-miR-669l; mmu-miR-125a-5p; mmu-miR-669f-5p; mmu-miR-20b; mmu-miR-295; mmu-miR-125b-5p; mmu-miR-23b; mmu-miR-377; mmu-miR-335-3p; mm…
Ppt1	2.34	65	27.7778	mmu-miR-467e; mmu-miR-93; mmu-miR-200b; mmu-miR-369-3p; mmu-miR-20a; mmu-miR-467f; mmu-miR-340-5p; mmu-miR-291a-5p; mmu-miR-181a; mmu-miR-290-3p; mmu-miR-543; mmu-miR-291b-5p; mmu-miR-132; mmu-miR-34a; mmu-miR-467a; mmu-miR-467h; mmu-miR-1983; mmu-miR-106a; mmu-miR-17; mmu-miR-381; mmu-miR-292-3p; mmu-miR-1952; mmu-miR-195; mmu-miR-433; mmu-miR-350; mmu-miR-148b; mmu-miR-297c; mmu-miR-429; mmu-mi…
Prdm1	2.49	48	19.2771	mmu-miR-495; mmu-miR-467e; mmu-miR-335-5p; mmu-miR-96; mmu-miR-19a; mmu-miR-150; mmu-miR-467f; mmu-miR-291a-5p; mmu-miR-434-3p; mmu-miR-155; mmu-miR-543; mmu-miR-367; mmu-miR-291b-5p; mmu-miR-467h; mmu-miR-468; mmu-miR-182; mmu-miR-672; mmu-miR-421; mmu-miR-381; mmu-miR-154; mmu-miR-423-5p; mmu-miR-19b; mmu-miR-32; mmu-miR-148b; mmu-miR-1960; mmu-miR-669l; mmu-miR-872; mmu-miR-1198-3p; mmu-miR-14…
Preb	3.975	84	21.1321	mmu-miR-200a; mmu-miR-495; mmu-miR-29b; mmu-miR-93; mmu-miR-804; mmu-miR-335-5p; mmu-miR-150; mmu-miR-674; mmu-miR-369-3p; mmu-miR-20a; mmu-miR-340-5p; mmu-miR-434-3p; mmu-miR-29c; mmu-miR-205; mmu-miR-367; mmu-miR-132; mmu-miR-1198-5p; mmu-miR-1983; mmu-miR-106a; mmu-miR-103; mmu-miR-17; mmu-miR-129-2-3p; mmu-miR-672; mmu-miR-1952; mmu-miR-129-1-3p; mmu-miR-466a-3p; mmu-miR-32; mmu-miR-195; mmu-…
Prickle1	1.333	28	21.0053	mmu-miR-200a; mmu-miR-467e; mmu-miR-145; mmu-miR-125a-5p; mmu-miR-431; mmu-miR-669d; mmu-miR-19a; mmu-miR-150; mmu-miR-125b-5p; mmu-miR-466b-3p; mmu-miR-30d; mmu-miR-30a; mmu-miR-466c-3p; mmu-miR-434-3p; mmu-miR-141; mmu-miR-21; mmu-miR-330; mmu-miR-205; mmu-miR-760-3p; mmu-miR-669f-3p; mmu-miR-134; mmu-miR-378; mmu-miR-30b; mmu-miR-467h; mmu-miR-376b; mmu-miR-33; mmu-miR-19b
Prkab2	4.007	100	24.9563	mmu-miR-495; mmu-miR-145; mmu-miR-93; mmu-miR-804; mmu-miR-713; mmu-miR-19a; mmu-miR-20a; mmu-miR-30d; mmu-miR-323-3p; mmu-miR-30a; mmu-miR-29c; mmu-miR-155; mmu-miR-669f-3p; mmu-miR-367; mmu-let-7a; mmu-miR-106a; mmu-miR-17; mmu-miR-129-2-3p; mmu-miR-129-1-3p; mmu-miR-302a; mmu-miR-669a-3p; mmu-miR-302d; mmu-let-7g; mmu-miR-433; mmu-miR-148b; mmu-miR-669l; mmu-miR-125a-5p; mmu-miR-1198-3p; mmu-m…
Prkcd	0.511	11	21.5264	mmu-miR-141; mmu-miR-200a; mmu-miR-134; mmu-miR-27a; mmu-miR-374; mmu-miR-1198-5p; mmu-miR-369-3p; mmu-miR-1935; mmu-miR-410; mmu-miR-101b
Prkcdbp	0.214	3	14.0187	mmu-miR-103; mmu-miR-145; mmu-miR-28
Prkch	1.127	16	14.197	mmu-miR-141; mmu-miR-669o-5p; mmu-miR-200a; mmu-miR-152; mmu-miR-148b; mmu-miR-291b-5p; mmu-miR-374; mmu-miR-532-5p; mmu-miR-183; mmu-miR-148a; mmu-miR-329; mmu-miR-291a-5p; mmu-miR-741
Prkrir	1.159	27	23.2959	mmu-miR-195; mmu-miR-350; mmu-miR-335-5p; mmu-miR-96; mmu-miR-136; mmu-miR-16; mmu-miR-340-5p; mmu-miR-23b; mmu-miR-762; mmu-miR-330; mmu-miR-335-3p; mmu-miR-760-3p; mmu-miR-134; mmu-miR-22; mmu-miR-15a; mmu-miR-541; mmu-miR-182; mmu-miR-202-3p; mmu-miR-672; mmu-miR-381; mmu-miR-1952; mmu-miR-15b; mmu-miR-23a
Prmt6	1.895	36	18.9974	mmu-miR-466a-3p; mmu-miR-433; mmu-miR-200a; mmu-miR-124; mmu-miR-136; mmu-miR-19a; mmu-miR-674; mmu-miR-466b-3p; mmu-miR-30d; mmu-miR-30a; mmu-miR-466c-3p; mmu-miR-141; mmu-miR-34c; mmu-miR-335-3p; mmu-miR-134; mmu-miR-34a; mmu-miR-22; mmu-miR-30b; mmu-miR-1198-5p; mmu-miR-129-2-3p; mmu-miR-1224; mmu-miR-142-5p; mmu-miR-1952; mmu-miR-1935; mmu-miR-129-1-3p; mmu-miR-19b
Prmt7	1.145	20	17.4672	mmu-miR-350; mmu-miR-1960; mmu-miR-713; mmu-miR-760-5p; mmu-miR-674; mmu-miR-291b-3p; mmu-miR-34c; mmu-miR-22; mmu-miR-34a; mmu-miR-532-5p; mmu-miR-468; mmu-miR-26b; mmu-miR-1224; mmu-miR-33; mmu-miR-26a; mmu-miR-1935; mmu-miR-292-5p
Proc	0.101	2	19.802	mmu-miR-495; mmu-miR-378
Procr	0.587	12	20.4429	mmu-miR-466c-3p; mmu-miR-335-3p; mmu-miR-145; mmu-miR-96; mmu-miR-466g; mmu-miR-182; mmu-miR-129-2-3p; mmu-miR-129-1-3p; mmu-miR-466b-3p; mmu-miR-101b
Pros1	1.153	23	19.948	mmu-miR-32; mmu-miR-495; mmu-miR-467e; mmu-miR-130a; mmu-miR-669d; mmu-miR-363-3p; mmu-miR-130b; mmu-miR-23b; mmu-miR-377; mmu-miR-28; mmu-miR-1196; mmu-miR-181a; mmu-miR-543; mmu-miR-367; mmu-miR-27a; mmu-miR-1198-5p; mmu-miR-301a; mmu-miR-467h; mmu-miR-25; mmu-miR-1983; mmu-miR-23a; mmu-miR-410
Prpf4b	1.281	33	25.7611	mmu-miR-669a-3p; mmu-miR-466a-3p; mmu-miR-200a; mmu-miR-495; mmu-miR-350; mmu-miR-713; mmu-miR-335-5p; mmu-miR-760-5p; mmu-miR-484; mmu-miR-340-5p; mmu-miR-23b; mmu-miR-377; mmu-miR-323-3p; mmu-miR-101b; mmu-miR-141; mmu-miR-21; mmu-miR-669f-3p; mmu-miR-543; mmu-miR-669o-3p; mmu-miR-532-5p; mmu-miR-182; mmu-miR-1224; mmu-miR-329; mmu-miR-142-5p; mmu-miR-23a; mmu-miR-292-5p
Prrx1	4.891	85	17.3789	mmu-miR-467e; mmu-miR-200b; mmu-miR-150; mmu-miR-369-3p; mmu-miR-467f; mmu-miR-30d; mmu-miR-296-5p; mmu-miR-30a; mmu-miR-181a; mmu-miR-155; mmu-miR-543; mmu-let-7a; mmu-miR-669o-3p; mmu-miR-34a; mmu-miR-30b; mmu-miR-191; mmu-miR-467h; mmu-miR-541; mmu-miR-468; mmu-miR-26b; mmu-miR-672; mmu-miR-302a; mmu-miR-423-5p; mmu-miR-669a-3p; mmu-let-7g; mmu-miR-302d; mmu-miR-433; mmu-miR-350; mmu-miR-124; …
Prss23	1.926	35	18.1724	mmu-miR-200a; mmu-miR-29b; mmu-miR-804; mmu-miR-713; mmu-miR-30d; mmu-miR-291a-5p; mmu-miR-30a; mmu-miR-181a; mmu-miR-21; mmu-miR-29c; mmu-miR-543; mmu-miR-132; mmu-miR-291b-5p; mmu-miR-27a; mmu-miR-30b; mmu-miR-182; mmu-miR-423-5p; mmu-miR-148b; mmu-miR-669l; mmu-miR-374; mmu-miR-1198-3p; mmu-miR-148a; mmu-miR-669d; mmu-miR-669f-5p; mmu-miR-762; mmu-miR-151-5p; mmu-miR-141; mmu-miR-152; mmu-miR-…
Psmb8	0.188	6	31.9149	mmu-miR-129-2-3p; mmu-miR-804; mmu-miR-30d; mmu-miR-129-1-3p; mmu-miR-30b; mmu-miR-30a
Psme3	1.665	37	22.2222	mmu-miR-669a-3p; mmu-miR-195; mmu-miR-433; mmu-miR-200a; mmu-miR-495; mmu-miR-350; mmu-miR-297c; mmu-miR-124; mmu-miR-713; mmu-miR-335-5p; mmu-miR-16; mmu-miR-467c; mmu-miR-484; mmu-miR-674; mmu-miR-340-5p; mmu-miR-30d; mmu-miR-323-3p; mmu-miR-30a; mmu-miR-151-5p; mmu-miR-141; mmu-miR-205; mmu-miR-669o-3p; mmu-miR-15a; mmu-miR-30b; mmu-miR-423-3p; mmu-miR-103; mmu-miR-1983; mmu-miR-1935; mmu-miR-…
Ptar1	0.729	22	30.1783	mmu-miR-32; mmu-miR-302d; mmu-miR-495; mmu-miR-713; mmu-miR-335-5p; mmu-miR-96; mmu-miR-363-3p; mmu-miR-674; mmu-miR-295; mmu-miR-466b-3p; mmu-miR-291a-5p; mmu-miR-466c-3p; mmu-miR-335-3p; mmu-miR-291b-5p; mmu-miR-367; mmu-miR-183; mmu-miR-25; mmu-miR-182; mmu-miR-291a-3p; mmu-miR-302a; mmu-miR-294; mmu-miR-410
Ptbp1	1.494	23	15.3949	mmu-miR-466a-3p; mmu-miR-124; mmu-miR-93; mmu-miR-804; mmu-miR-429; mmu-miR-200b; mmu-miR-20b; mmu-miR-20a; mmu-miR-340-5p; mmu-miR-762; mmu-miR-376c; mmu-miR-296-5p; mmu-miR-28; mmu-miR-330; mmu-miR-669f-3p; mmu-miR-106b; mmu-miR-1983; mmu-miR-106a; mmu-miR-17; mmu-miR-200c; mmu-miR-329; mmu-miR-154
Pten	6.132	218	35.5512	mmu-miR-495; mmu-miR-93; mmu-miR-804; mmu-miR-335-5p; mmu-miR-466g; mmu-miR-431; mmu-miR-19a; mmu-miR-20a; mmu-miR-340-5p; mmu-miR-466b-3p; mmu-miR-30d; mmu-miR-323-3p; mmu-miR-30a; mmu-miR-28; mmu-miR-434-3p; mmu-miR-29c; mmu-miR-290-3p; mmu-miR-155; mmu-miR-669f-3p; mmu-miR-367; mmu-let-7a; mmu-miR-191; mmu-miR-468; mmu-miR-106a; mmu-miR-17; mmu-miR-202-3p; mmu-miR-672; mmu-miR-381; mmu-miR-292…
Ptgs2	2.445	57	23.3129	mmu-miR-93; mmu-miR-19a; mmu-miR-150; mmu-miR-20a; mmu-miR-340-5p; mmu-miR-466b-3p; mmu-miR-291a-5p; mmu-miR-323-3p; mmu-miR-669f-3p; mmu-miR-543; mmu-miR-367; mmu-miR-291b-5p; mmu-miR-132; mmu-miR-191; mmu-miR-106a; mmu-miR-103; mmu-miR-17; mmu-miR-26b; mmu-miR-672; mmu-miR-381; mmu-miR-1952; mmu-miR-19b; mmu-miR-195; mmu-miR-32; mmu-miR-433; mmu-miR-350; mmu-miR-374; mmu-miR-125a-5p; mmu-miR-16…
Ptpn11	3.635	76	20.9078	mmu-miR-29b; mmu-miR-145; mmu-miR-335-5p; mmu-miR-96; mmu-miR-467c; mmu-miR-369-3p; mmu-miR-30d; mmu-miR-296-5p; mmu-miR-323-3p; mmu-miR-30a; mmu-miR-434-3p; mmu-miR-29c; mmu-miR-290-3p; mmu-miR-155; mmu-miR-543; mmu-let-7a; mmu-miR-34a; mmu-miR-467a; mmu-miR-27a; mmu-miR-30b; mmu-miR-1198-5p; mmu-miR-182; mmu-miR-103; mmu-miR-202-3p; mmu-miR-672; mmu-miR-292-3p; mmu-miR-1952; mmu-miR-302a; mmu-m…
Ptpn14	6.64	161	24.247	mmu-miR-495; mmu-miR-804; mmu-miR-713; mmu-miR-466g; mmu-miR-467c; mmu-miR-19a; mmu-miR-296-5p; mmu-miR-28; mmu-miR-21; mmu-miR-29c; mmu-miR-290-3p; mmu-miR-367; mmu-let-7a; mmu-miR-541; mmu-miR-129-2-3p; mmu-miR-672; mmu-miR-381; mmu-miR-292-3p; mmu-miR-154; mmu-miR-129-1-3p; mmu-miR-302a; mmu-miR-669a-3p; mmu-miR-302d; mmu-let-7g; mmu-miR-195; mmu-miR-124; mmu-miR-148b; mmu-miR-669l; mmu-miR-13…
Ptprb	5.663	130	22.956	mmu-miR-495; mmu-miR-804; mmu-miR-335-5p; mmu-miR-96; mmu-miR-466g; mmu-miR-431; mmu-miR-19a; mmu-miR-340-5p; mmu-miR-466b-3p; mmu-miR-30d; mmu-miR-323-3p; mmu-miR-30a; mmu-miR-434-3p; mmu-miR-21; mmu-miR-367; mmu-miR-129-2-3p; mmu-miR-202-3p; mmu-miR-672; mmu-miR-381; mmu-miR-154; mmu-miR-129-1-3p; mmu-miR-302a; mmu-miR-669a-3p; mmu-miR-466a-3p; mmu-miR-302d; mmu-miR-195; mmu-miR-124; mmu-miR-14…
Ptpre	2.988	61	20.415	mmu-miR-495; mmu-miR-335-5p; mmu-miR-130a; mmu-miR-466g; mmu-miR-19a; mmu-miR-130b; mmu-miR-340-5p; mmu-miR-669f-3p; mmu-miR-367; mmu-miR-669o-3p; mmu-miR-34a; mmu-miR-541; mmu-miR-468; mmu-miR-1983; mmu-miR-381; mmu-miR-1952; mmu-miR-302a; mmu-miR-19b; mmu-miR-669a-3p; mmu-miR-466a-3p; mmu-miR-302d; mmu-miR-32; mmu-miR-124; mmu-miR-148b; mmu-miR-350; mmu-miR-148a; mmu-miR-484; mmu-miR-363-3p; mm…
Ptprj	3.521	58	16.4726	mmu-miR-96; mmu-miR-466g; mmu-miR-19a; mmu-miR-674; mmu-miR-30d; mmu-miR-296-5p; mmu-miR-291a-5p; mmu-miR-30a; mmu-miR-434-3p; mmu-miR-669o-5p; mmu-miR-21; mmu-miR-669f-3p; mmu-miR-543; mmu-miR-291b-5p; mmu-miR-30b; mmu-miR-1983; mmu-miR-182; mmu-miR-26b; mmu-miR-1952; mmu-miR-154; mmu-miR-423-5p; mmu-miR-19b; mmu-miR-142-3p; mmu-miR-297c; mmu-miR-760-5p; mmu-miR-669d; mmu-miR-18b; mmu-miR-23b; m…
Ptprk	1.542	37	23.9948	mmu-miR-200a; mmu-miR-29b; mmu-miR-93; mmu-miR-713; mmu-miR-20a; mmu-miR-340-5p; mmu-miR-466b-3p; mmu-miR-323-3p; mmu-miR-29c; mmu-miR-155; mmu-miR-367; mmu-miR-34a; mmu-miR-27a; mmu-miR-106a; mmu-miR-17; mmu-miR-421; mmu-miR-195; mmu-miR-32; mmu-miR-350; mmu-miR-16; mmu-miR-20b; mmu-miR-363-3p; mmu-miR-741; mmu-miR-141; mmu-miR-1196; mmu-miR-291b-3p; mmu-miR-466c-3p; mmu-miR-34c; mmu-miR-29a; mm…
Ptrf	1.891	28	14.807	mmu-miR-195; mmu-let-7g; mmu-miR-495; mmu-miR-467e; mmu-miR-124; mmu-miR-669l; mmu-miR-335-5p; mmu-miR-16; mmu-miR-431; mmu-miR-669f-5p; mmu-miR-674; mmu-miR-18b; mmu-miR-296-5p; mmu-let-7c; mmu-miR-669o-5p; mmu-miR-760-3p; mmu-let-7a; mmu-miR-669a-5p; mmu-miR-15a; mmu-miR-467h; mmu-let-7e; mmu-miR-129-2-3p; mmu-miR-202-3p; mmu-miR-33; mmu-miR-129-1-3p; mmu-miR-1935; mmu-miR-15b; mmu-miR-423-5p
Purb	7.313	145	19.8277	mmu-miR-495; mmu-miR-93; mmu-miR-713; mmu-miR-96; mmu-miR-466g; mmu-miR-20a; mmu-miR-323-3p; mmu-miR-28; mmu-miR-434-3p; mmu-miR-21; mmu-miR-155; mmu-miR-669f-3p; mmu-miR-367; mmu-let-7a; mmu-miR-468; mmu-miR-106a; mmu-miR-17; mmu-miR-672; mmu-miR-381; mmu-miR-302a; mmu-miR-302d; mmu-let-7g; mmu-miR-195; mmu-miR-124; mmu-miR-148b; mmu-miR-760-5p; mmu-miR-1198-3p; mmu-miR-148a; mmu-miR-20b; mmu-mi…
Pus10	1.517	30	19.7759	mmu-let-7g; mmu-miR-297c; mmu-miR-124; mmu-miR-374; mmu-miR-19a; mmu-miR-369-3p; mmu-miR-18b; mmu-miR-466b-3p; mmu-miR-376c; mmu-miR-30d; mmu-let-7c; mmu-miR-377; mmu-miR-323-3p; mmu-miR-30a; mmu-miR-466c-3p; mmu-miR-669o-5p; mmu-miR-34c; mmu-miR-330; mmu-miR-335-3p; mmu-miR-543; mmu-let-7a; mmu-miR-132; mmu-miR-34a; mmu-miR-30b; mmu-let-7e; mmu-miR-297a; mmu-miR-19b
Pycard	0.609	13	21.3465	mmu-miR-330; mmu-miR-495; mmu-miR-124; mmu-miR-543; mmu-miR-136; mmu-miR-130a; mmu-miR-301a; mmu-miR-19a; mmu-miR-130b; mmu-miR-467f; mmu-miR-292-5p; mmu-miR-323-3p; mmu-miR-19b
Pycr2	0.446	6	13.4529	mmu-miR-1983; mmu-miR-127; mmu-miR-1952; mmu-miR-423-5p
Qpctl	0.937	30	32.0171	mmu-miR-669a-3p; mmu-miR-200a; mmu-miR-29b; mmu-miR-148b; mmu-miR-669l; mmu-miR-429; mmu-miR-335-5p; mmu-miR-96; mmu-miR-200b; mmu-miR-148a; mmu-miR-19a; mmu-miR-669f-5p; mmu-miR-674; mmu-miR-467f; mmu-miR-762; mmu-miR-141; mmu-miR-152; mmu-miR-29c; mmu-miR-29a; mmu-miR-669o-3p; mmu-miR-669a-5p; mmu-miR-22; mmu-miR-191; mmu-miR-182; mmu-miR-200c; mmu-miR-26b; mmu-miR-1952; mmu-miR-26a; mmu-miR-29…
Qprt	0.909	6	6.60066	mmu-miR-302d; mmu-miR-291a-3p; mmu-miR-295; mmu-miR-713; mmu-miR-302a; mmu-miR-294
Qsox1	1.011	25	24.728	mmu-miR-142-3p; mmu-miR-29b; mmu-miR-297c; mmu-miR-804; mmu-miR-713; mmu-miR-96; mmu-miR-760-5p; mmu-miR-669d; mmu-miR-18b; mmu-miR-762; mmu-miR-28; mmu-miR-21; mmu-miR-330; mmu-miR-34c; mmu-miR-29a; mmu-miR-29c; mmu-miR-335-3p; mmu-miR-34a; mmu-miR-193b; mmu-miR-182; mmu-miR-297a; mmu-miR-1935
Rab11fip1	4.403	90	20.4406	mmu-miR-200a; mmu-miR-713; mmu-miR-335-5p; mmu-miR-200b; mmu-miR-431; mmu-miR-467c; mmu-miR-150; mmu-miR-369-3p; mmu-miR-340-5p; mmu-miR-466b-3p; mmu-miR-669o-5p; mmu-miR-290-3p; mmu-miR-205; mmu-miR-34a; mmu-miR-467a; mmu-miR-1198-5p; mmu-miR-191; mmu-miR-103; mmu-miR-1983; mmu-miR-129-2-3p; mmu-miR-292-3p; mmu-miR-129-1-3p; mmu-miR-302a; mmu-miR-423-5p; mmu-miR-466a-3p; mmu-miR-302d; mmu-miR-43…
Rab11fip4	5.184	118	22.7623	mmu-miR-495; mmu-miR-93; mmu-miR-713; mmu-miR-96; mmu-miR-20a; mmu-miR-340-5p; mmu-miR-296-5p; mmu-miR-28; mmu-miR-434-3p; mmu-miR-29c; mmu-let-7a; mmu-miR-468; mmu-miR-106a; mmu-miR-17; mmu-miR-381; mmu-let-7g; mmu-miR-124; mmu-miR-148b; mmu-miR-125a-5p; mmu-miR-760-5p; mmu-miR-148a; mmu-miR-20b; mmu-miR-125b-5p; mmu-miR-23b; mmu-miR-34c; mmu-miR-330; mmu-miR-152; mmu-miR-22; mmu-miR-378; mmu-mi…
Rab19	0.574	11	19.1638	mmu-miR-34c; mmu-miR-335-3p; mmu-miR-134; mmu-miR-34a; mmu-miR-96; mmu-miR-484; mmu-miR-182; mmu-miR-376b; mmu-miR-129-2-3p; mmu-miR-762; mmu-miR-129-1-3p
Rab30	1.178	32	27.1647	mmu-miR-302d; mmu-miR-200a; mmu-miR-467e; mmu-miR-29b; mmu-miR-145; mmu-miR-93; mmu-miR-429; mmu-miR-335-5p; mmu-miR-136; mmu-miR-130a; mmu-miR-200b; mmu-miR-20b; mmu-miR-130b; mmu-miR-295; mmu-miR-20a; mmu-miR-101b; mmu-miR-141; mmu-miR-335-3p; mmu-miR-29c; mmu-miR-29a; mmu-miR-155; mmu-miR-301a; mmu-miR-106b; mmu-miR-1198-5p; mmu-miR-467h; mmu-miR-106a; mmu-miR-291a-3p; mmu-miR-17; mmu-miR-200c…
Rab32	1.291	24	18.5902	mmu-miR-669a-3p; mmu-miR-466a-3p; mmu-miR-142-3p; mmu-miR-29b; mmu-miR-804; mmu-miR-429; mmu-miR-200b; mmu-miR-760-5p; mmu-miR-484; mmu-miR-18b; mmu-miR-741; mmu-miR-29a; mmu-miR-29c; mmu-miR-335-3p; mmu-miR-134; mmu-miR-669o-3p; mmu-miR-1198-5p; mmu-miR-376b; mmu-miR-200c; mmu-miR-410
Rab38	0.706	14	19.83	mmu-miR-141; mmu-miR-433; mmu-miR-200a; mmu-miR-335-3p; mmu-miR-124; mmu-miR-374; mmu-miR-30b; mmu-miR-125a-5p; mmu-miR-369-3p; mmu-miR-329; mmu-miR-125b-5p; mmu-miR-30d; mmu-miR-410; mmu-miR-30a
Rab3ip	1.252	36	28.754	mmu-miR-302d; mmu-miR-200a; mmu-miR-142-3p; mmu-miR-1960; mmu-miR-148b; mmu-miR-713; mmu-miR-130a; mmu-miR-148a; mmu-miR-669d; mmu-miR-467c; mmu-miR-130b; mmu-miR-674; mmu-miR-295; mmu-miR-23b; mmu-miR-141; mmu-miR-291b-3p; mmu-miR-152; mmu-miR-290-3p; mmu-miR-467a; mmu-miR-301a; mmu-miR-291a-3p; mmu-miR-421; mmu-miR-1952; mmu-miR-292-3p; mmu-miR-302a; mmu-miR-292-5p; mmu-miR-23a; mmu-miR-466f; m…
Rab6b	4.03	80	19.8511	mmu-miR-495; mmu-miR-29b; mmu-miR-145; mmu-miR-804; mmu-miR-713; mmu-miR-96; mmu-miR-466g; mmu-miR-150; mmu-miR-674; mmu-miR-467f; mmu-miR-434-3p; mmu-miR-669o-5p; mmu-miR-181a; mmu-miR-29c; mmu-miR-669f-3p; mmu-let-7a; mmu-miR-34a; mmu-miR-27a; mmu-miR-1198-5p; mmu-miR-182; mmu-miR-26b; mmu-miR-381; mmu-miR-154; mmu-let-7g; mmu-miR-195; mmu-miR-350; mmu-miR-148b; mmu-miR-1960; mmu-miR-297c; mmu-…
Racgap1	0.893	27	30.2352	mmu-miR-29b; mmu-miR-145; mmu-miR-93; mmu-miR-429; mmu-miR-200b; mmu-miR-760-5p; mmu-miR-1198-3p; mmu-miR-484; mmu-miR-20b; mmu-miR-20a; mmu-miR-377; mmu-miR-669o-5p; mmu-miR-335-3p; mmu-miR-290-3p; mmu-miR-29a; mmu-miR-29c; mmu-miR-760-3p; mmu-miR-22; mmu-miR-467a; mmu-miR-382; mmu-miR-106b; mmu-miR-106a; mmu-miR-17; mmu-miR-200c; mmu-miR-142-5p; mmu-miR-292-3p
Rad21	1.451	33	22.7429	mmu-miR-467e; mmu-miR-29b; mmu-miR-1960; mmu-miR-145; mmu-miR-124; mmu-miR-669l; mmu-miR-96; mmu-miR-19a; mmu-miR-669f-5p; mmu-miR-674; mmu-miR-340-5p; mmu-miR-466b-3p; mmu-miR-291a-5p; mmu-miR-741; mmu-miR-466c-3p; mmu-miR-669o-5p; mmu-miR-21; mmu-miR-29a; mmu-miR-29c; mmu-miR-132; mmu-miR-134; mmu-miR-291b-5p; mmu-miR-669a-5p; mmu-miR-382; mmu-miR-1198-5p; mmu-miR-467h; mmu-miR-541; mmu-miR-672…
Rad51	2.118	42	19.83	mmu-miR-195; mmu-miR-467e; mmu-miR-1960; mmu-miR-145; mmu-miR-136; mmu-miR-374; mmu-miR-16; mmu-miR-466g; mmu-miR-19a; mmu-miR-369-3p; mmu-miR-467f; mmu-miR-762; mmu-miR-30d; mmu-miR-377; mmu-miR-30a; mmu-miR-101b; mmu-miR-669o-5p; mmu-miR-127; mmu-miR-543; mmu-miR-15a; mmu-miR-27a; mmu-miR-1198-5p; mmu-miR-30b; mmu-miR-467h; mmu-miR-103; mmu-miR-421; mmu-miR-381; mmu-miR-15b; mmu-miR-410; mmu-mi…
Raf1	0.697	9	12.9125	mmu-miR-205; mmu-miR-22; mmu-miR-96; mmu-miR-182; mmu-miR-202-3p; mmu-miR-18b; mmu-miR-1952; mmu-miR-381; mmu-miR-28
Ralgps2	4.998	113	22.609	mmu-miR-495; mmu-miR-145; mmu-miR-93; mmu-miR-804; mmu-miR-713; mmu-miR-466g; mmu-miR-431; mmu-miR-19a; mmu-miR-20a; mmu-miR-466b-3p; mmu-miR-30d; mmu-miR-296-5p; mmu-miR-30a; mmu-miR-28; mmu-miR-21; mmu-miR-29c; mmu-let-7a; mmu-miR-541; mmu-miR-468; mmu-miR-106a; mmu-miR-17; mmu-miR-202-3p; mmu-miR-672; mmu-miR-381; mmu-miR-669a-3p; mmu-miR-466a-3p; mmu-let-7g; mmu-miR-124; mmu-miR-669l; mmu-miR…
Raly	0.372	5	13.4409	mmu-miR-34c; mmu-miR-152; mmu-miR-148b; mmu-miR-34a; mmu-miR-148a
Ranbp17	1.607	45	28.0025	mmu-miR-200a; mmu-miR-495; mmu-miR-29b; mmu-miR-93; mmu-miR-713; mmu-miR-335-5p; mmu-miR-19a; mmu-miR-20a; mmu-miR-28; mmu-miR-29c; mmu-miR-1198-5p; mmu-miR-106a; mmu-miR-17; mmu-miR-26b; mmu-miR-421; mmu-miR-19b; mmu-miR-195; mmu-miR-350; mmu-miR-136; mmu-miR-16; mmu-miR-20b; mmu-miR-484; mmu-miR-762; mmu-miR-741; mmu-miR-141; mmu-miR-29a; mmu-miR-335-3p; mmu-miR-134; mmu-miR-22; mmu-miR-15a; mm…
Rap1b	1.34	43	32.0896	mmu-miR-29b; mmu-miR-145; mmu-miR-93; mmu-miR-369-3p; mmu-miR-20a; mmu-miR-467f; mmu-miR-466b-3p; mmu-miR-30d; mmu-miR-30a; mmu-miR-669o-5p; mmu-miR-21; mmu-miR-29c; mmu-miR-669f-3p; mmu-miR-132; mmu-miR-30b; mmu-miR-1198-5p; mmu-miR-106a; mmu-miR-17; mmu-miR-381; mmu-miR-1960; mmu-miR-297c; mmu-miR-669l; mmu-miR-125a-5p; mmu-miR-374; mmu-miR-669f-5p; mmu-miR-484; mmu-miR-20b; mmu-miR-125b-5p; mm…
Rap2a	3.356	95	28.3075	mmu-miR-200a; mmu-miR-495; mmu-miR-467e; mmu-miR-29b; mmu-miR-804; mmu-miR-431; mmu-miR-467c; mmu-miR-674; mmu-miR-369-3p; mmu-miR-467f; mmu-miR-466b-3p; mmu-miR-30d; mmu-miR-323-3p; mmu-miR-30a; mmu-miR-29c; mmu-miR-290-3p; mmu-miR-132; mmu-miR-34a; mmu-miR-467a; mmu-miR-27a; mmu-miR-30b; mmu-miR-467h; mmu-miR-421; mmu-miR-292-3p; mmu-miR-302a; mmu-miR-466a-3p; mmu-miR-195; mmu-miR-302d; mmu-miR…
Rapgef6	3.18	72	22.6415	mmu-miR-495; mmu-miR-145; mmu-miR-93; mmu-miR-713; mmu-miR-335-5p; mmu-miR-96; mmu-miR-200b; mmu-miR-466g; mmu-miR-431; mmu-miR-19a; mmu-miR-674; mmu-miR-369-3p; mmu-miR-20a; mmu-miR-340-5p; mmu-miR-323-3p; mmu-miR-21; mmu-miR-669f-3p; mmu-miR-367; mmu-miR-541; mmu-miR-468; mmu-miR-106a; mmu-miR-182; mmu-miR-17; mmu-miR-381; mmu-miR-19b; mmu-miR-32; mmu-miR-433; mmu-miR-148b; mmu-miR-1960; mmu-mi…
Rasa4	0.308	3	9.74026	mmu-miR-150; mmu-miR-335-5p; mmu-miR-466g
Rasgrp2	1.75	31	17.7143	mmu-miR-350; mmu-miR-669l; mmu-miR-136; mmu-miR-467c; mmu-miR-669f-5p; mmu-miR-484; mmu-miR-674; mmu-miR-720; mmu-miR-762; mmu-miR-296-5p; mmu-miR-741; mmu-miR-377; mmu-miR-669o-5p; mmu-miR-330; mmu-miR-34c; mmu-miR-760-3p; mmu-miR-669a-5p; mmu-miR-22; mmu-miR-34a; mmu-miR-27a; mmu-miR-382; mmu-miR-1198-5p; mmu-miR-1983; mmu-miR-182; mmu-miR-103; mmu-miR-1952; mmu-miR-33; mmu-miR-1935
Rasl2-9	0.341	5	14.6628	mmu-miR-34c; mmu-miR-205; mmu-miR-34a; mmu-miR-142-5p; mmu-miR-382
Rassf1	1.379	40	29.0065	mmu-miR-713; mmu-miR-96; mmu-miR-130a; mmu-miR-19a; mmu-miR-130b; mmu-miR-466b-3p; mmu-miR-296-5p; mmu-miR-323-3p; mmu-miR-28; mmu-miR-669o-5p; mmu-miR-181a; mmu-miR-205; mmu-miR-468; mmu-miR-182; mmu-miR-1983; mmu-miR-202-3p; mmu-miR-672; mmu-miR-19b; mmu-miR-433; mmu-miR-124; mmu-miR-136; mmu-miR-484; mmu-miR-466c-3p; mmu-miR-330; mmu-miR-335-3p; mmu-miR-134; mmu-miR-760-3p; mmu-miR-376a; mmu-m…
Rassf3	2.586	56	21.6551	mmu-miR-200a; mmu-miR-93; mmu-miR-96; mmu-miR-19a; mmu-miR-20a; mmu-miR-340-5p; mmu-miR-296-5p; mmu-miR-28; mmu-miR-155; mmu-miR-367; mmu-let-7a; mmu-miR-1983; mmu-miR-182; mmu-miR-106a; mmu-miR-103; mmu-miR-17; mmu-miR-672; mmu-miR-423-5p; mmu-miR-19b; mmu-let-7g; mmu-miR-195; mmu-miR-32; mmu-miR-142-3p; mmu-miR-124; mmu-miR-374; mmu-miR-16; mmu-miR-760-5p; mmu-miR-1198-3p; mmu-miR-363-3p; mmu-m…
Rbm3	0.764	13	17.0157	mmu-miR-141; mmu-miR-433; mmu-miR-34c; mmu-miR-200a; mmu-miR-34a; mmu-miR-30b; mmu-miR-1198-5p; mmu-miR-466g; mmu-miR-150; mmu-miR-142-5p; mmu-miR-340-5p; mmu-miR-30d; mmu-miR-30a
Rbm5	2.388	66	27.6382	mmu-miR-93; mmu-miR-335-5p; mmu-miR-466g; mmu-miR-674; mmu-miR-20a; mmu-miR-467f; mmu-miR-30d; mmu-miR-30a; mmu-miR-28; mmu-miR-290-3p; mmu-miR-543; mmu-miR-34a; mmu-miR-467a; mmu-miR-30b; mmu-miR-106a; mmu-miR-182; mmu-miR-17; mmu-miR-292-3p; mmu-miR-423-5p; mmu-miR-195; mmu-miR-466a-3p; mmu-miR-669l; mmu-miR-136; mmu-miR-125a-5p; mmu-miR-16; mmu-miR-1198-3p; mmu-miR-669d; mmu-miR-669f-5p; mmu-m…
Rbmx	1.99	33	16.5829	mmu-miR-433; mmu-miR-142-3p; mmu-miR-495; mmu-miR-467e; mmu-miR-29b; mmu-miR-125a-5p; mmu-miR-1198-3p; mmu-miR-669d; mmu-miR-674; mmu-miR-125b-5p; mmu-miR-296-5p; mmu-miR-1196; mmu-miR-1945; mmu-miR-34c; mmu-miR-29a; mmu-miR-29c; mmu-miR-669f-3p; mmu-miR-34a; mmu-miR-1198-5p; mmu-miR-532-5p; mmu-miR-467h; mmu-miR-193b; mmu-miR-468; mmu-miR-421; mmu-miR-1952; mmu-miR-381
Rbmxl2	0.249	1	4.01606	mmu-miR-292-5p
Rbp4	0.252	6	23.8095	mmu-miR-297c; mmu-miR-674; mmu-miR-125b-5p; mmu-miR-297a; mmu-miR-125a-5p; mmu-miR-377
Rbpms2	1.098	36	32.7869	mmu-miR-495; mmu-miR-145; mmu-miR-713; mmu-miR-335-5p; mmu-miR-150; mmu-miR-674; mmu-miR-30d; mmu-miR-30a; mmu-miR-28; mmu-miR-205; mmu-miR-367; mmu-miR-34a; mmu-miR-27a; mmu-miR-30b; mmu-miR-191; mmu-miR-672; mmu-miR-381; mmu-miR-195; mmu-miR-32; mmu-miR-297c; mmu-miR-16; mmu-miR-363-3p; mmu-miR-484; mmu-miR-23b; mmu-miR-34c; mmu-miR-760-3p; mmu-miR-15a; mmu-miR-25; mmu-miR-329; mmu-miR-33; mmu-…
Rbx1	1.271	4	3.14713	mmu-miR-142-3p; mmu-miR-1952; mmu-miR-27a; mmu-miR-101b
Rcc2	2.016	32	15.873	mmu-miR-29b; mmu-miR-148b; mmu-miR-124; mmu-miR-713; mmu-miR-335-5p; mmu-miR-96; mmu-miR-148a; mmu-miR-376c; mmu-miR-30d; mmu-miR-30a; mmu-miR-151-5p; mmu-miR-330; mmu-miR-152; mmu-miR-127; mmu-miR-29a; mmu-miR-29c; mmu-miR-376a; mmu-miR-22; mmu-miR-378; mmu-miR-30b; mmu-miR-193b; mmu-miR-541; mmu-miR-182; mmu-miR-1224; mmu-miR-1935; mmu-miR-292-5p; mmu-miR-423-5p
Rcor2	0.568	10	17.6056	mmu-miR-330; mmu-miR-181a; mmu-miR-145; mmu-miR-543; mmu-miR-335-5p; mmu-miR-22; mmu-miR-125a-5p; mmu-miR-125b-5p; mmu-miR-33; mmu-miR-741
Rdh12	0.6	18	30	mmu-miR-195; mmu-let-7g; mmu-miR-350; mmu-miR-669l; mmu-miR-16; mmu-miR-669f-5p; mmu-let-7c; mmu-miR-1196; mmu-miR-760-3p; mmu-let-7a; mmu-miR-134; mmu-miR-543; mmu-miR-669a-5p; mmu-miR-15a; mmu-let-7e; mmu-miR-202-3p; mmu-miR-15b
Relt	1.382	19	13.7482	mmu-miR-1960; mmu-miR-148b; mmu-miR-335-5p; mmu-miR-148a; mmu-miR-674; mmu-miR-762; mmu-miR-28; mmu-miR-101b; mmu-miR-152; mmu-miR-330; mmu-miR-155; mmu-miR-205; mmu-miR-134; mmu-miR-1893; mmu-miR-532-5p; mmu-miR-1224; mmu-miR-1935
Rfc5	1.707	31	18.1605	mmu-miR-302d; mmu-miR-195; mmu-miR-200a; mmu-miR-124; mmu-miR-93; mmu-miR-713; mmu-miR-16; mmu-miR-20b; mmu-miR-150; mmu-miR-295; mmu-miR-20a; mmu-miR-762; mmu-miR-741; mmu-miR-141; mmu-miR-205; mmu-miR-134; mmu-miR-22; mmu-miR-27a; mmu-miR-15a; mmu-miR-106b; mmu-miR-106a; mmu-miR-103; mmu-miR-291a-3p; mmu-miR-17; mmu-miR-33; mmu-miR-302a; mmu-miR-15b; mmu-miR-466f; mmu-miR-423-5p; mmu-miR-294
Rftn1	1.898	46	24.236	mmu-miR-495; mmu-miR-130a; mmu-miR-200b; mmu-miR-466g; mmu-miR-19a; mmu-miR-130b; mmu-miR-466b-3p; mmu-miR-291a-5p; mmu-miR-323-3p; mmu-miR-155; mmu-miR-669f-3p; mmu-miR-543; mmu-miR-291b-5p; mmu-miR-1893; mmu-miR-1983; mmu-miR-421; mmu-miR-19b; mmu-miR-195; mmu-miR-297c; mmu-miR-350; mmu-miR-669l; mmu-miR-429; mmu-miR-16; mmu-miR-669d; mmu-miR-669f-5p; mmu-miR-484; mmu-miR-762; mmu-miR-376c; mmu…
Rfx6	0.623	35	56.1798	mmu-miR-32; mmu-let-7g; mmu-miR-297c; mmu-miR-136; mmu-miR-130a; mmu-miR-363-3p; mmu-miR-130b; mmu-miR-340-5p; mmu-miR-23b; mmu-miR-466b-3p; mmu-miR-376c; mmu-miR-30d; mmu-let-7c; mmu-miR-30a; mmu-miR-466c-3p; mmu-miR-181a; mmu-miR-335-3p; mmu-miR-543; mmu-miR-367; mmu-let-7a; mmu-miR-301a; mmu-miR-30b; mmu-miR-183; mmu-miR-25; mmu-let-7e; mmu-miR-1983; mmu-miR-142-5p; mmu-miR-297a; mmu-miR-23a
Rgag4	2.519	68	26.9948	mmu-miR-29b; mmu-miR-93; mmu-miR-804; mmu-miR-96; mmu-miR-130a; mmu-miR-200b; mmu-miR-431; mmu-miR-130b; mmu-miR-20a; mmu-miR-28; mmu-miR-434-3p; mmu-miR-669o-5p; mmu-miR-21; mmu-miR-29c; mmu-miR-290-3p; mmu-miR-205; mmu-miR-155; mmu-miR-132; mmu-miR-467a; mmu-miR-1198-5p; mmu-miR-1983; mmu-miR-106a; mmu-miR-103; mmu-miR-129-2-3p; mmu-miR-17; mmu-miR-672; mmu-miR-421; mmu-miR-292-3p; mmu-miR-129-…
Rgl1	2.249	48	21.3428	mmu-miR-431; mmu-miR-150; mmu-miR-674; mmu-miR-467f; mmu-miR-30d; mmu-miR-30a; mmu-miR-28; mmu-miR-181a; mmu-miR-155; mmu-miR-669f-3p; mmu-let-7a; mmu-miR-132; mmu-miR-34a; mmu-miR-30b; mmu-miR-202-3p; mmu-miR-1952; mmu-miR-154; mmu-let-7g; mmu-miR-195; mmu-miR-124; mmu-miR-148b; mmu-miR-1960; mmu-miR-669l; mmu-miR-16; mmu-miR-760-5p; mmu-miR-148a; mmu-miR-669f-5p; mmu-miR-484; mmu-let-7c; mmu-mi…
Rgs2	2.342	48	20.4953	mmu-miR-200a; mmu-miR-495; mmu-miR-804; mmu-miR-335-5p; mmu-miR-200b; mmu-miR-431; mmu-miR-19a; mmu-miR-150; mmu-miR-674; mmu-miR-467f; mmu-miR-296-5p; mmu-miR-323-3p; mmu-miR-205; mmu-miR-669f-3p; mmu-miR-543; mmu-miR-1198-5p; mmu-miR-468; mmu-miR-103; mmu-miR-202-3p; mmu-miR-421; mmu-miR-302a; mmu-miR-19b; mmu-miR-195; mmu-miR-302d; mmu-miR-429; mmu-miR-16; mmu-miR-760-5p; mmu-miR-1198-3p; mmu-…
Rgs8	7.416	172	23.1931	mmu-miR-495; mmu-miR-145; mmu-miR-93; mmu-miR-335-5p; mmu-miR-96; mmu-miR-466g; mmu-miR-467c; mmu-miR-20a; mmu-miR-340-5p; mmu-miR-30d; mmu-miR-296-5p; mmu-miR-323-3p; mmu-miR-30a; mmu-miR-28; mmu-miR-29c; mmu-miR-290-3p; mmu-miR-367; mmu-let-7a; mmu-miR-541; mmu-miR-468; mmu-miR-106a; mmu-miR-17; mmu-miR-129-2-3p; mmu-miR-202-3p; mmu-miR-672; mmu-miR-292-3p; mmu-miR-129-1-3p; mmu-miR-302a; mmu-m…
Rhebl1	0.427	10	23.4192	mmu-miR-34c; mmu-miR-330; mmu-miR-34a; mmu-miR-760-5p; mmu-miR-183; mmu-miR-541; mmu-miR-669d; mmu-miR-33; mmu-miR-101b; mmu-miR-410
Rhob	1.279	15	11.7279	mmu-miR-466c-3p; mmu-miR-297c; mmu-miR-760-3p; mmu-miR-669l; mmu-miR-669a-5p; mmu-miR-335-5p; mmu-miR-378; mmu-miR-431; mmu-miR-669f-5p; mmu-miR-421; mmu-miR-762; mmu-miR-1935; mmu-miR-297a; mmu-miR-376c; mmu-miR-466b-3p
Rhoj	1.203	15	12.4688	mmu-miR-34c; mmu-miR-330; mmu-miR-152; mmu-miR-148b; mmu-miR-760-3p; mmu-miR-134; mmu-miR-132; mmu-miR-34a; mmu-miR-335-5p; mmu-miR-136; mmu-miR-148a; mmu-miR-340-5p; mmu-miR-142-5p; mmu-miR-18b; mmu-miR-1935
Rhot2	0.911	7	7.68386	mmu-let-7g; mmu-let-7e; mmu-let-7a; mmu-miR-762; mmu-miR-296-5p; mmu-let-7c
Rhpn1	0.862	14	16.2413	mmu-miR-34c; mmu-miR-330; mmu-miR-205; mmu-miR-1960; mmu-miR-145; mmu-miR-34a; mmu-miR-431; mmu-miR-484; mmu-miR-1983; mmu-miR-1224; mmu-miR-762; mmu-miR-376c; mmu-miR-292-5p
Rhpn2	1.274	35	27.4725	mmu-miR-32; mmu-miR-195; mmu-miR-200a; mmu-miR-350; mmu-miR-124; mmu-miR-335-5p; mmu-miR-96; mmu-miR-16; mmu-miR-484; mmu-miR-363-3p; mmu-miR-467f; mmu-miR-466b-3p; mmu-miR-30d; mmu-miR-291a-5p; mmu-miR-323-3p; mmu-miR-30a; mmu-miR-466c-3p; mmu-miR-141; mmu-miR-335-3p; mmu-miR-367; mmu-miR-132; mmu-miR-291b-5p; mmu-miR-15a; mmu-miR-27a; mmu-miR-30b; mmu-miR-25; mmu-miR-103; mmu-miR-381; mmu-miR-1…
Rif1	1.18	30	25.4237	mmu-miR-466a-3p; mmu-miR-350; mmu-miR-93; mmu-miR-136; mmu-miR-466g; mmu-miR-20b; mmu-miR-20a; mmu-miR-340-5p; mmu-miR-101b; mmu-miR-34c; mmu-miR-205; mmu-miR-669f-3p; mmu-miR-543; mmu-miR-34a; mmu-miR-378; mmu-miR-106b; mmu-miR-1198-5p; mmu-miR-193b; mmu-miR-106a; mmu-miR-17; mmu-miR-26b; mmu-miR-381; mmu-miR-142-5p; mmu-miR-26a
Rims2	0.176	4	22.7273	mmu-miR-669f-5p; mmu-miR-760-3p; mmu-miR-669l; mmu-miR-669a-5p
Rims3	5.072	91	17.9416	mmu-miR-804; mmu-miR-713; mmu-miR-335-5p; mmu-miR-96; mmu-miR-200b; mmu-miR-150; mmu-miR-674; mmu-miR-323-3p; mmu-miR-181a; mmu-miR-290-3p; mmu-miR-669f-3p; mmu-let-7a; mmu-miR-34a; mmu-miR-467a; mmu-miR-27a; mmu-miR-1198-5p; mmu-miR-1983; mmu-miR-182; mmu-miR-103; mmu-miR-129-2-3p; mmu-miR-202-3p; mmu-miR-421; mmu-miR-292-3p; mmu-miR-1952; mmu-miR-154; mmu-miR-129-1-3p; mmu-miR-423-5p; mmu-miR-4…
Ripk3	0.201	4	19.9005	mmu-miR-543; mmu-miR-1224; mmu-miR-335-5p; mmu-miR-378
Ripk4	1.152	23	19.9653	mmu-miR-433; mmu-miR-200a; mmu-miR-145; mmu-miR-431; mmu-miR-669d; mmu-miR-19a; mmu-miR-484; mmu-miR-340-5p; mmu-miR-101b; mmu-miR-141; mmu-miR-34c; mmu-miR-34a; mmu-miR-378; mmu-miR-382; mmu-miR-532-5p; mmu-miR-142-5p; mmu-miR-381; mmu-miR-1935; mmu-miR-19b; mmu-miR-410
Rnf114	1.798	36	20.0222	mmu-miR-195; mmu-miR-200a; mmu-miR-1960; mmu-miR-124; mmu-miR-804; mmu-miR-713; mmu-miR-429; mmu-miR-335-5p; mmu-miR-96; mmu-miR-200b; mmu-miR-16; mmu-miR-760-5p; mmu-miR-484; mmu-miR-150; mmu-miR-762; mmu-miR-296-5p; mmu-miR-291a-5p; mmu-miR-741; mmu-miR-434-3p; mmu-miR-141; mmu-miR-291b-5p; mmu-miR-22; mmu-miR-15a; mmu-miR-27a; mmu-miR-423-3p; mmu-miR-468; mmu-miR-329; mmu-miR-200c; mmu-miR-193…
Rnf157	2.353	62	26.3493	mmu-miR-96; mmu-miR-130a; mmu-miR-130b; mmu-miR-674; mmu-miR-30d; mmu-miR-296-5p; mmu-miR-323-3p; mmu-miR-30a; mmu-miR-28; mmu-miR-434-3p; mmu-miR-181a; mmu-miR-27a; mmu-miR-30b; mmu-miR-182; mmu-miR-129-2-3p; mmu-miR-421; mmu-miR-1952; mmu-miR-129-1-3p; mmu-miR-302a; mmu-miR-423-5p; mmu-miR-302d; mmu-miR-195; mmu-miR-350; mmu-miR-148b; mmu-miR-1960; mmu-miR-297c; mmu-miR-374; mmu-miR-125a-5p; mm…
Rnf213	1.26	48	38.0952	mmu-miR-93; mmu-miR-130a; mmu-miR-200b; mmu-miR-130b; mmu-miR-20a; mmu-miR-30d; mmu-miR-30a; mmu-miR-28; mmu-miR-205; mmu-let-7a; mmu-miR-34a; mmu-miR-27a; mmu-miR-30b; mmu-miR-468; mmu-miR-106a; mmu-miR-182; mmu-miR-17; mmu-miR-26b; mmu-miR-202-3p; mmu-miR-1952; mmu-miR-466a-3p; mmu-let-7g; mmu-miR-433; mmu-miR-429; mmu-miR-125a-5p; mmu-miR-20b; mmu-miR-125b-5p; mmu-miR-23b; mmu-let-7c; mmu-miR-…
Rnf220	0.841	24	28.5375	mmu-miR-297c; mmu-miR-669l; mmu-miR-669f-5p; mmu-miR-150; mmu-miR-762; mmu-miR-466b-3p; mmu-miR-376c; mmu-miR-30d; mmu-miR-377; mmu-miR-28; mmu-miR-30a; mmu-miR-466c-3p; mmu-miR-760-3p; mmu-miR-669a-5p; mmu-miR-1198-5p; mmu-miR-30b; mmu-miR-423-3p; mmu-miR-329; mmu-miR-381; mmu-miR-297a
Rnf41	3.004	51	16.9774	mmu-miR-495; mmu-miR-467e; mmu-miR-130a; mmu-miR-466g; mmu-miR-467c; mmu-miR-19a; mmu-miR-130b; mmu-miR-323-3p; mmu-miR-181a; mmu-miR-290-3p; mmu-miR-205; mmu-miR-34a; mmu-miR-467a; mmu-miR-27a; mmu-miR-467h; mmu-miR-129-2-3p; mmu-miR-421; mmu-miR-292-3p; mmu-miR-1952; mmu-miR-129-1-3p; mmu-miR-302a; mmu-miR-423-5p; mmu-miR-19b; mmu-miR-195; mmu-miR-302d; mmu-miR-350; mmu-miR-1960; mmu-miR-297c; …
Rnf6	1.011	27	26.7062	mmu-miR-297c; mmu-miR-1960; mmu-miR-148b; mmu-miR-145; mmu-miR-429; mmu-miR-200b; mmu-miR-466g; mmu-miR-148a; mmu-miR-340-5p; mmu-miR-376c; mmu-miR-30d; mmu-miR-30a; mmu-miR-152; mmu-miR-335-3p; mmu-miR-1198-5p; mmu-miR-30b; mmu-miR-541; mmu-miR-376b; mmu-miR-200c; mmu-miR-1952; mmu-miR-142-5p; mmu-miR-297a; mmu-miR-410
Rnf7	0.797	13	16.3112	mmu-miR-141; mmu-miR-200a; mmu-miR-495; mmu-miR-297c; mmu-miR-669f-3p; mmu-miR-27a; mmu-miR-136; mmu-miR-33; mmu-miR-297a; mmu-miR-741; mmu-miR-101b
Robo3	0.343	11	32.07	mmu-miR-669o-5p; mmu-miR-21; mmu-miR-152; mmu-miR-148b; mmu-miR-134; mmu-miR-130a; mmu-miR-301a; mmu-miR-431; mmu-miR-148a; mmu-miR-130b; mmu-miR-674
Rora	9.285	223	24.0172	mmu-miR-495; mmu-miR-93; mmu-miR-713; mmu-miR-466g; mmu-miR-19a; mmu-miR-20a; mmu-miR-340-5p; mmu-miR-466b-3p; mmu-miR-30d; mmu-miR-323-3p; mmu-miR-30a; mmu-miR-29c; mmu-miR-290-3p; mmu-miR-155; mmu-miR-367; mmu-miR-191; mmu-miR-541; mmu-miR-468; mmu-miR-106a; mmu-miR-17; mmu-miR-381; mmu-miR-292-3p; mmu-miR-302a; mmu-miR-669a-3p; mmu-miR-302d; mmu-miR-195; mmu-miR-433; mmu-miR-124; mmu-miR-669l;…
Rpl11	0.256	9	35.1562	mmu-miR-669o-5p; mmu-miR-467e; mmu-miR-669l; mmu-miR-669a-5p; mmu-miR-378; mmu-miR-467h; mmu-miR-669f-5p; mmu-miR-202-3p; mmu-miR-762
Rpl21	1.079	25	23.1696	mmu-miR-669a-3p; mmu-miR-1960; mmu-miR-148b; mmu-miR-429; mmu-miR-335-5p; mmu-miR-136; mmu-miR-872; mmu-miR-200b; mmu-miR-760-5p; mmu-miR-148a; mmu-miR-674; mmu-miR-377; mmu-miR-152; mmu-miR-181a; mmu-miR-155; mmu-miR-669o-3p; mmu-miR-22; mmu-miR-27a; mmu-miR-200c; mmu-miR-154; mmu-miR-410
Rpl27a	0.638	8	12.5392	mmu-miR-466c-3p; mmu-miR-467e; mmu-miR-335-3p; mmu-miR-27a; mmu-miR-467h; mmu-miR-329; mmu-miR-466b-3p; mmu-miR-101b
Rpl29	0.119	1	8.40336	mmu-miR-377
Rpl6	0.307	8	26.0586	mmu-miR-34c; mmu-miR-495; mmu-miR-297c; mmu-miR-34a; mmu-miR-154; mmu-miR-297a; mmu-miR-1935; mmu-miR-872
Rpn2	0.596	14	23.4899	mmu-miR-141; mmu-miR-200a; mmu-miR-669l; mmu-miR-669a-5p; mmu-miR-27a; mmu-miR-30b; mmu-miR-466g; mmu-miR-669f-5p; mmu-miR-329; mmu-miR-296-5p; mmu-miR-30d; mmu-miR-30a; mmu-miR-377
Rprd1a	3.22	79	24.5342	mmu-miR-200a; mmu-miR-495; mmu-miR-804; mmu-miR-335-5p; mmu-miR-96; mmu-miR-200b; mmu-miR-467c; mmu-miR-150; mmu-miR-467f; mmu-miR-340-5p; mmu-miR-466b-3p; mmu-miR-30d; mmu-miR-323-3p; mmu-miR-30a; mmu-miR-28; mmu-miR-434-3p; mmu-miR-669o-5p; mmu-miR-290-3p; mmu-miR-205; mmu-miR-155; mmu-let-7a; mmu-miR-467a; mmu-miR-27a; mmu-miR-30b; mmu-miR-1983; mmu-miR-103; mmu-miR-182; mmu-miR-292-3p; mmu-mi…
Rprd2	3.339	46	13.7766	mmu-miR-467e; mmu-miR-804; mmu-miR-431; mmu-miR-369-3p; mmu-miR-30d; mmu-miR-291a-5p; mmu-miR-30a; mmu-miR-434-3p; mmu-miR-669o-5p; mmu-miR-205; mmu-miR-669f-3p; mmu-miR-291b-5p; mmu-let-7a; mmu-miR-132; mmu-miR-34a; mmu-miR-27a; mmu-miR-30b; mmu-miR-467h; mmu-miR-129-2-3p; mmu-miR-202-3p; mmu-miR-1952; mmu-miR-129-1-3p; mmu-let-7g; mmu-miR-142-3p; mmu-miR-350; mmu-miR-374; mmu-miR-760-5p; mmu-mi…
Rps20	3.167	37	11.683	mmu-miR-32; mmu-miR-297c; mmu-miR-713; mmu-miR-429; mmu-miR-130a; mmu-miR-200b; mmu-miR-363-3p; mmu-miR-130b; mmu-miR-150; mmu-miR-369-3p; mmu-miR-23b; mmu-miR-291a-5p; mmu-miR-377; mmu-miR-335-3p; mmu-miR-367; mmu-miR-291b-5p; mmu-miR-382; mmu-miR-1198-5p; mmu-miR-301a; mmu-miR-532-5p; mmu-miR-183; mmu-miR-193b; mmu-miR-25; mmu-miR-468; mmu-miR-1224; mmu-miR-200c; mmu-miR-672; mmu-miR-33; mmu-mi…
Rps24	0.36	9	25	mmu-miR-195; mmu-miR-152; mmu-miR-148b; mmu-miR-15a; mmu-miR-136; mmu-miR-16; mmu-miR-148a; mmu-miR-15b; mmu-miR-28
Rrbp1	0.496	11	22.1774	mmu-miR-152; mmu-miR-1960; mmu-miR-148b; mmu-miR-145; mmu-miR-134; mmu-miR-804; mmu-miR-130a; mmu-miR-301a; mmu-miR-532-5p; mmu-miR-148a; mmu-miR-130b
Rrp12	0.355	7	19.7183	mmu-miR-468; mmu-miR-330; mmu-miR-467e; mmu-miR-296-5p; mmu-miR-741; mmu-miR-467h; mmu-miR-466f
Rrp1b	2.324	37	15.9208	mmu-miR-713; mmu-miR-335-5p; mmu-miR-431; mmu-miR-674; mmu-miR-466b-3p; mmu-miR-30d; mmu-miR-30a; mmu-miR-28; mmu-miR-205; mmu-let-7a; mmu-miR-34a; mmu-miR-27a; mmu-miR-30b; mmu-miR-103; mmu-miR-672; mmu-miR-1952; mmu-miR-423-5p; mmu-let-7g; mmu-miR-466a-3p; mmu-miR-350; mmu-miR-136; mmu-miR-374; mmu-miR-762; mmu-let-7c; mmu-miR-466c-3p; mmu-miR-330; mmu-miR-34c; mmu-miR-134; mmu-miR-22; mmu-miR-…
Rspo2	1.716	46	26.8065	mmu-miR-93; mmu-miR-713; mmu-miR-20a; mmu-miR-467f; mmu-miR-28; mmu-miR-181a; mmu-miR-155; mmu-miR-1198-5p; mmu-miR-468; mmu-miR-1983; mmu-miR-182; mmu-miR-106a; mmu-miR-103; mmu-miR-17; mmu-miR-672; mmu-miR-381; mmu-miR-195; mmu-miR-148b; mmu-miR-1960; mmu-miR-136; mmu-miR-16; mmu-miR-1198-3p; mmu-miR-148a; mmu-miR-669d; mmu-miR-20b; mmu-miR-741; mmu-miR-291b-3p; mmu-miR-152; mmu-miR-335-3p; mmu…
Rtkn2	1.951	31	15.8893	mmu-miR-669a-3p; mmu-miR-195; mmu-miR-374; mmu-miR-16; mmu-miR-125a-5p; mmu-miR-340-5p; mmu-miR-125b-5p; mmu-miR-18b; mmu-miR-466b-3p; mmu-miR-376c; mmu-miR-323-3p; mmu-miR-466c-3p; mmu-miR-21; mmu-miR-330; mmu-miR-205; mmu-miR-543; mmu-miR-669o-3p; mmu-miR-15a; mmu-miR-27a; mmu-miR-468; mmu-miR-103; mmu-miR-26b; mmu-miR-672; mmu-miR-381; mmu-miR-1952; mmu-miR-26a; mmu-miR-15b; mmu-miR-292-5p
Runx1t1	3.762	86	22.8602	mmu-miR-495; mmu-miR-804; mmu-miR-713; mmu-miR-335-5p; mmu-miR-19a; mmu-miR-340-5p; mmu-miR-466b-3p; mmu-miR-323-3p; mmu-miR-29c; mmu-miR-669f-3p; mmu-miR-367; mmu-let-7a; mmu-miR-541; mmu-miR-468; mmu-miR-466a-3p; mmu-let-7g; mmu-miR-195; mmu-miR-148b; mmu-miR-760-5p; mmu-miR-148a; mmu-miR-23b; mmu-miR-377; mmu-miR-466c-3p; mmu-miR-152; mmu-miR-335-3p; mmu-miR-134; mmu-miR-22; mmu-miR-378; mmu-m…
Rxrg	0.35	4	11.4286	mmu-miR-329; mmu-miR-23b; mmu-miR-1952; mmu-miR-23a
S100a1	0.294	7	23.8095	mmu-miR-669f-5p; mmu-miR-34c; mmu-miR-150; mmu-miR-669l; mmu-miR-669a-5p; mmu-miR-34a; mmu-miR-27a
S1pr1	1.362	29	21.2922	mmu-miR-495; mmu-miR-669l; mmu-miR-713; mmu-miR-335-5p; mmu-miR-96; mmu-miR-130a; mmu-miR-466g; mmu-miR-669f-5p; mmu-miR-130b; mmu-miR-674; mmu-miR-720; mmu-miR-340-5p; mmu-miR-30d; mmu-miR-741; mmu-miR-487b; mmu-miR-30a; mmu-miR-1196; mmu-miR-669a-5p; mmu-miR-382; mmu-miR-1198-5p; mmu-miR-301a; mmu-miR-30b; mmu-miR-182; mmu-miR-672; mmu-miR-1952
S1pr2	1.52	19	12.5	mmu-miR-195; mmu-miR-433; mmu-miR-1960; mmu-miR-148b; mmu-miR-124; mmu-miR-713; mmu-miR-16; mmu-miR-760-5p; mmu-miR-148a; mmu-miR-150; mmu-miR-23b; mmu-miR-152; mmu-miR-134; mmu-miR-15a; mmu-miR-1198-5p; mmu-miR-193b; mmu-miR-1224; mmu-miR-15b; mmu-miR-23a
S1pr3	2.876	53	18.4284	mmu-miR-495; mmu-miR-335-5p; mmu-miR-130a; mmu-miR-130b; mmu-miR-674; mmu-miR-467f; mmu-miR-181a; mmu-miR-155; mmu-miR-669f-3p; mmu-miR-132; mmu-miR-34a; mmu-miR-27a; mmu-miR-103; mmu-miR-423-5p; mmu-miR-466a-3p; mmu-miR-142-3p; mmu-miR-124; mmu-miR-148b; mmu-miR-1960; mmu-miR-297c; mmu-miR-669l; mmu-miR-374; mmu-miR-1198-3p; mmu-miR-148a; mmu-miR-669f-5p; mmu-miR-762; mmu-miR-376c; mmu-miR-741; …
Sacm1l	1.661	32	19.2655	mmu-miR-302d; mmu-miR-433; mmu-miR-200a; mmu-miR-495; mmu-miR-145; mmu-miR-804; mmu-miR-130a; mmu-miR-130b; mmu-miR-295; mmu-miR-340-5p; mmu-miR-291a-5p; mmu-miR-101b; mmu-miR-1196; mmu-miR-141; mmu-miR-181a; mmu-miR-335-3p; mmu-miR-760-3p; mmu-miR-669f-3p; mmu-miR-132; mmu-miR-134; mmu-miR-291b-5p; mmu-miR-301a; mmu-miR-423-3p; mmu-miR-183; mmu-miR-468; mmu-miR-291a-3p; mmu-miR-302a; mmu-miR-410…
Sae1	0.784	21	26.7857	mmu-miR-433; mmu-miR-1960; mmu-miR-93; mmu-miR-374; mmu-miR-431; mmu-miR-484; mmu-miR-20b; mmu-miR-369-3p; mmu-miR-20a; mmu-miR-762; mmu-miR-296-5p; mmu-miR-741; mmu-miR-434-3p; mmu-miR-34c; mmu-miR-155; mmu-miR-34a; mmu-miR-106b; mmu-miR-1983; mmu-miR-106a; mmu-miR-17; mmu-miR-142-5p
Sall1	1.13	24	21.2389	mmu-miR-350; mmu-miR-297c; mmu-miR-145; mmu-miR-429; mmu-miR-335-5p; mmu-miR-200b; mmu-miR-101b; mmu-miR-434-3p; mmu-miR-21; mmu-miR-669f-3p; mmu-miR-543; mmu-miR-22; mmu-miR-27a; mmu-miR-183; mmu-miR-200c; mmu-miR-26b; mmu-miR-672; mmu-miR-142-5p; mmu-miR-381; mmu-miR-26a; mmu-miR-297a; mmu-miR-410
Sall4	1.697	30	17.6783	mmu-let-7g; mmu-miR-1960; mmu-miR-148b; mmu-miR-93; mmu-miR-148a; mmu-miR-20b; mmu-miR-150; mmu-miR-20a; mmu-let-7c; mmu-miR-741; mmu-miR-377; mmu-miR-330; mmu-miR-152; mmu-miR-205; mmu-let-7a; mmu-miR-132; mmu-miR-106b; mmu-miR-532-5p; mmu-miR-1983; mmu-miR-106a; mmu-let-7e; mmu-miR-129-2-3p; mmu-miR-17; mmu-miR-329; mmu-miR-202-3p; mmu-miR-672; mmu-miR-142-5p; mmu-miR-154; mmu-miR-129-1-3p
Samd10	1.844	30	16.269	mmu-miR-195; mmu-miR-200a; mmu-miR-1960; mmu-miR-145; mmu-miR-335-5p; mmu-miR-16; mmu-miR-431; mmu-miR-669d; mmu-miR-150; mmu-miR-674; mmu-miR-720; mmu-miR-141; mmu-miR-330; mmu-miR-205; mmu-miR-760-3p; mmu-miR-669f-3p; mmu-miR-22; mmu-miR-15a; mmu-miR-103; mmu-miR-129-2-3p; mmu-miR-26b; mmu-miR-672; mmu-miR-421; mmu-miR-381; mmu-miR-1952; mmu-miR-129-1-3p; mmu-miR-26a; mmu-miR-15b; mmu-miR-423-5p
Samd14	1.354	32	23.6337	mmu-miR-32; mmu-miR-145; mmu-miR-125a-5p; mmu-miR-466g; mmu-miR-467c; mmu-miR-484; mmu-miR-363-3p; mmu-miR-150; mmu-miR-23b; mmu-miR-125b-5p; mmu-miR-762; mmu-miR-296-5p; mmu-miR-330; mmu-miR-21; mmu-miR-290-3p; mmu-miR-760-3p; mmu-miR-367; mmu-miR-134; mmu-miR-467a; mmu-miR-423-3p; mmu-miR-193b; mmu-miR-25; mmu-miR-103; mmu-miR-1983; mmu-miR-329; mmu-miR-26b; mmu-miR-292-3p; mmu-miR-1952; mmu-mi…
Samd5	1.728	41	23.7269	mmu-miR-200a; mmu-miR-93; mmu-miR-804; mmu-miR-335-5p; mmu-miR-200b; mmu-miR-19a; mmu-miR-20a; mmu-miR-323-3p; mmu-miR-28; mmu-miR-669o-3p; mmu-miR-34a; mmu-miR-27a; mmu-miR-541; mmu-miR-468; mmu-miR-106a; mmu-miR-17; mmu-miR-19b; mmu-miR-669a-3p; mmu-miR-124; mmu-miR-350; mmu-miR-429; mmu-miR-760-5p; mmu-miR-20b; mmu-miR-23b; mmu-miR-141; mmu-miR-34c; mmu-miR-335-3p; mmu-miR-22; mmu-miR-293; mmu…
Sar1b	0.482	27	56.0166	mmu-miR-32; mmu-miR-302d; mmu-miR-124; mmu-miR-93; mmu-miR-363-3p; mmu-miR-20b; mmu-miR-674; mmu-miR-295; mmu-miR-20a; mmu-miR-340-5p; mmu-miR-23b; mmu-miR-762; mmu-miR-1196; mmu-miR-543; mmu-miR-367; mmu-miR-106b; mmu-miR-25; mmu-miR-106a; mmu-miR-17; mmu-miR-291a-3p; mmu-miR-26b; mmu-miR-26a; mmu-miR-23a; mmu-miR-302a; mmu-miR-294
Sat1	0.679	21	30.9278	mmu-miR-142-3p; mmu-miR-297c; mmu-miR-93; mmu-miR-804; mmu-miR-136; mmu-miR-466g; mmu-miR-669d; mmu-miR-20b; mmu-miR-20a; mmu-miR-34c; mmu-miR-127; mmu-miR-34a; mmu-miR-106b; mmu-miR-182; mmu-miR-106a; mmu-miR-103; mmu-miR-17; mmu-miR-329; mmu-miR-297a; mmu-miR-410
Sbf2	1.385	21	15.1625	mmu-miR-200a; mmu-miR-148b; mmu-miR-713; mmu-miR-148a; mmu-miR-150; mmu-miR-340-5p; mmu-miR-18b; mmu-miR-377; mmu-miR-323-3p; mmu-miR-141; mmu-miR-152; mmu-miR-335-3p; mmu-miR-378; mmu-miR-103; mmu-miR-1224; mmu-miR-329; mmu-miR-672; mmu-miR-421; mmu-miR-1935; mmu-miR-292-5p; mmu-miR-410
Scara3	1.342	24	17.8838	mmu-miR-669a-3p; mmu-miR-195; mmu-miR-433; mmu-miR-145; mmu-miR-335-5p; mmu-miR-16; mmu-miR-19a; mmu-miR-340-5p; mmu-miR-23b; mmu-miR-762; mmu-miR-205; mmu-miR-760-3p; mmu-miR-132; mmu-miR-669o-3p; mmu-miR-22; mmu-miR-15a; mmu-miR-468; mmu-miR-1935; mmu-miR-15b; mmu-miR-23a; mmu-miR-292-5p; mmu-miR-19b
Scmh1	0.925	29	31.3514	mmu-miR-195; mmu-miR-495; mmu-miR-29b; mmu-miR-1960; mmu-miR-16; mmu-miR-1198-3p; mmu-miR-340-5p; mmu-miR-18b; mmu-miR-762; mmu-miR-296-5p; mmu-miR-28; mmu-miR-34c; mmu-miR-330; mmu-miR-205; mmu-miR-290-3p; mmu-miR-29a; mmu-miR-29c; mmu-miR-34a; mmu-miR-467a; mmu-miR-378; mmu-miR-15a; mmu-miR-103; mmu-miR-33; mmu-miR-292-3p; mmu-miR-15b
Scpep1	0.642	7	10.9034	mmu-miR-468; mmu-miR-330; mmu-miR-674; mmu-miR-291b-5p; mmu-miR-22; mmu-miR-126-3p; mmu-miR-291a-5p
Scrt2	1.938	40	20.6398	mmu-miR-93; mmu-miR-804; mmu-miR-200b; mmu-miR-150; mmu-miR-20a; mmu-let-7a; mmu-miR-34a; mmu-miR-541; mmu-miR-106a; mmu-miR-1983; mmu-miR-17; mmu-miR-1952; mmu-miR-302a; mmu-miR-423-5p; mmu-let-7g; mmu-miR-302d; mmu-miR-429; mmu-miR-125a-5p; mmu-miR-20b; mmu-miR-484; mmu-miR-295; mmu-miR-125b-5p; mmu-miR-762; mmu-let-7c; mmu-miR-34c; mmu-miR-760-3p; mmu-miR-106b; mmu-let-7e; mmu-miR-291a-3p; mmu…
Scx	0.348	3	8.62069	mmu-miR-376b; mmu-miR-467f; mmu-miR-381
Sdc2	2.19	63	28.7671	mmu-miR-200a; mmu-miR-495; mmu-miR-93; mmu-miR-96; mmu-miR-200b; mmu-miR-150; mmu-miR-20a; mmu-miR-467f; mmu-miR-340-5p; mmu-miR-466b-3p; mmu-miR-291a-5p; mmu-miR-434-3p; mmu-miR-181a; mmu-miR-669f-3p; mmu-miR-367; mmu-miR-291b-5p; mmu-miR-132; mmu-miR-669o-3p; mmu-miR-34a; mmu-miR-126-3p; mmu-miR-27a; mmu-miR-1198-5p; mmu-miR-106a; mmu-miR-103; mmu-miR-182; mmu-miR-17; mmu-miR-26b; mmu-miR-202-3…
Sdcbp	1.72	42	24.4186	mmu-miR-495; mmu-miR-467e; mmu-miR-93; mmu-miR-674; mmu-miR-20a; mmu-miR-467f; mmu-miR-466b-3p; mmu-miR-291a-5p; mmu-miR-323-3p; mmu-miR-181a; mmu-miR-155; mmu-miR-205; mmu-miR-543; mmu-miR-291b-5p; mmu-miR-27a; mmu-miR-467h; mmu-miR-106a; mmu-miR-103; mmu-miR-17; mmu-miR-381; mmu-miR-466a-3p; mmu-miR-124; mmu-miR-148b; mmu-miR-1960; mmu-miR-136; mmu-miR-148a; mmu-miR-20b; mmu-miR-23b; mmu-miR-74…
Sdr39u1	0.317	2	6.30915	mmu-miR-1983; mmu-miR-183
Sec14l1	2.362	62	26.2489	mmu-miR-804; mmu-miR-713; mmu-miR-335-5p; mmu-miR-96; mmu-miR-466g; mmu-miR-296-5p; mmu-miR-291a-5p; mmu-miR-669o-5p; mmu-miR-543; mmu-miR-291b-5p; mmu-let-7a; mmu-miR-34a; mmu-miR-103; mmu-miR-182; mmu-miR-129-2-3p; mmu-miR-202-3p; mmu-miR-421; mmu-miR-381; mmu-miR-1952; mmu-miR-129-1-3p; mmu-let-7g; mmu-miR-195; mmu-miR-669l; mmu-miR-136; mmu-miR-16; mmu-miR-760-5p; mmu-miR-669f-5p; mmu-miR-484…
Sec14l2	1.266	25	19.7472	mmu-miR-195; mmu-miR-93; mmu-miR-713; mmu-miR-872; mmu-miR-16; mmu-miR-1198-3p; mmu-miR-20b; mmu-miR-150; mmu-miR-674; mmu-miR-20a; mmu-miR-762; mmu-miR-296-5p; mmu-miR-377; mmu-miR-323-3p; mmu-miR-330; mmu-miR-15a; mmu-miR-106b; mmu-miR-106a; mmu-miR-103; mmu-miR-1983; mmu-miR-376b; mmu-miR-17; mmu-miR-142-5p; mmu-miR-15b
Sec14l4	1.681	43	25.58	mmu-miR-145; mmu-miR-93; mmu-miR-20a; mmu-miR-296-5p; mmu-miR-27a; mmu-miR-1198-5p; mmu-miR-106a; mmu-miR-103; mmu-miR-1983; mmu-miR-17; mmu-miR-1952; mmu-miR-302a; mmu-miR-195; mmu-miR-302d; mmu-miR-148b; mmu-miR-297c; mmu-miR-136; mmu-miR-16; mmu-miR-760-5p; mmu-miR-148a; mmu-miR-20b; mmu-miR-295; mmu-miR-377; mmu-miR-152; mmu-miR-330; mmu-miR-22; mmu-miR-15a; mmu-miR-106b; mmu-miR-183; mmu-miR…
Selm	0.191	2	10.4712	mmu-miR-329; mmu-miR-760-5p
Sema3e	3.899	73	18.7227	mmu-miR-467e; mmu-miR-466g; mmu-miR-431; mmu-miR-369-3p; mmu-miR-467f; mmu-miR-340-5p; mmu-miR-466b-3p; mmu-miR-21; mmu-miR-543; mmu-miR-367; mmu-miR-191; mmu-miR-467h; mmu-miR-129-2-3p; mmu-miR-26b; mmu-miR-154; mmu-miR-129-1-3p; mmu-miR-32; mmu-miR-433; mmu-miR-350; mmu-miR-669l; mmu-miR-136; mmu-miR-872; mmu-miR-125a-5p; mmu-miR-374; mmu-miR-669f-5p; mmu-miR-363-3p; mmu-miR-125b-5p; mmu-miR-23…
Sema4d	1.363	21	15.4072	mmu-miR-195; mmu-miR-433; mmu-miR-145; mmu-miR-669l; mmu-miR-16; mmu-miR-669f-5p; mmu-miR-150; mmu-miR-720; mmu-miR-762; mmu-miR-30d; mmu-miR-741; mmu-miR-30a; mmu-miR-669f-3p; mmu-miR-669a-5p; mmu-miR-15a; mmu-miR-30b; mmu-miR-183; mmu-miR-129-2-3p; mmu-miR-129-1-3p; mmu-miR-15b; mmu-miR-466f
Sema7a	1.263	29	22.9612	mmu-miR-466a-3p; mmu-miR-93; mmu-miR-760-5p; mmu-miR-20b; mmu-miR-20a; mmu-miR-762; mmu-miR-296-5p; mmu-miR-323-3p; mmu-miR-28; mmu-miR-291b-3p; mmu-miR-1945; mmu-miR-335-3p; mmu-miR-205; mmu-miR-378; mmu-miR-27a; mmu-miR-106b; mmu-miR-193b; mmu-miR-106a; mmu-miR-17; mmu-miR-33; mmu-miR-1952; mmu-miR-142-5p; mmu-miR-1935; mmu-miR-423-5p
Senp2	2.574	69	26.8065	mmu-miR-495; mmu-miR-29b; mmu-miR-145; mmu-miR-335-5p; mmu-miR-466g; mmu-miR-340-5p; mmu-miR-30d; mmu-miR-291a-5p; mmu-miR-323-3p; mmu-miR-30a; mmu-miR-21; mmu-miR-181a; mmu-miR-29c; mmu-miR-205; mmu-miR-543; mmu-miR-291b-5p; mmu-let-7a; mmu-miR-132; mmu-miR-34a; mmu-miR-27a; mmu-miR-30b; mmu-miR-1983; mmu-miR-103; mmu-miR-129-2-3p; mmu-miR-26b; mmu-miR-202-3p; mmu-miR-421; mmu-miR-129-1-3p; mmu-…
Senp5	0.921	11	11.9435	mmu-miR-181a; mmu-miR-205; mmu-miR-374; mmu-miR-760-5p; mmu-miR-466g; mmu-miR-183; mmu-miR-369-3p; mmu-miR-23b; mmu-miR-762; mmu-miR-23a; mmu-miR-423-5p
Sepsecs	4.889	109	22.2949	mmu-miR-145; mmu-miR-93; mmu-miR-804; mmu-miR-466g; mmu-miR-467c; mmu-miR-19a; mmu-miR-20a; mmu-miR-466b-3p; mmu-miR-28; mmu-miR-434-3p; mmu-miR-290-3p; mmu-miR-155; mmu-miR-468; mmu-miR-106a; mmu-miR-17; mmu-miR-129-2-3p; mmu-miR-672; mmu-miR-381; mmu-miR-292-3p; mmu-miR-129-1-3p; mmu-miR-302a; mmu-miR-302d; mmu-miR-148b; mmu-miR-669l; mmu-miR-760-5p; mmu-miR-148a; mmu-miR-669f-5p; mmu-miR-20b; …
Sepw1	0.347	3	8.64553	mmu-miR-1196; mmu-miR-433; mmu-miR-99b
Serinc1	1.383	31	22.415	mmu-miR-466a-3p; mmu-miR-200a; mmu-miR-467e; mmu-miR-350; mmu-miR-297c; mmu-miR-145; mmu-miR-669l; mmu-miR-429; mmu-miR-200b; mmu-miR-466g; mmu-miR-19a; mmu-miR-669f-5p; mmu-miR-467f; mmu-miR-340-5p; mmu-miR-323-3p; mmu-miR-101b; mmu-miR-141; mmu-miR-181a; mmu-miR-132; mmu-miR-669a-5p; mmu-miR-382; mmu-miR-1198-5p; mmu-miR-467h; mmu-miR-1224; mmu-miR-200c; mmu-miR-142-5p; mmu-miR-297a; mmu-miR-19b
Serinc5	3.807	83	21.8019	mmu-miR-200a; mmu-miR-495; mmu-miR-29b; mmu-miR-145; mmu-miR-713; mmu-miR-96; mmu-miR-466g; mmu-miR-431; mmu-miR-150; mmu-miR-674; mmu-miR-340-5p; mmu-miR-434-3p; mmu-miR-29c; mmu-miR-205; mmu-miR-543; mmu-miR-367; mmu-miR-132; mmu-miR-34a; mmu-miR-27a; mmu-miR-1198-5p; mmu-miR-468; mmu-miR-182; mmu-miR-129-2-3p; mmu-miR-421; mmu-miR-381; mmu-miR-1952; mmu-miR-129-1-3p; mmu-miR-423-5p; mmu-miR-32…
Sertad4	1.885	23	12.2016	mmu-miR-32; mmu-miR-433; mmu-miR-136; mmu-miR-669d; mmu-miR-363-3p; mmu-miR-150; mmu-miR-762; mmu-miR-30d; mmu-miR-101b; mmu-miR-30a; mmu-miR-434-3p; mmu-miR-181a; mmu-miR-367; mmu-miR-27a; mmu-miR-30b; mmu-miR-541; mmu-miR-25; mmu-miR-468; mmu-miR-182; mmu-miR-376b; mmu-miR-672; mmu-miR-410
Setd1b	2.623	65	24.7808	mmu-miR-96; mmu-miR-674; mmu-miR-369-3p; mmu-miR-467f; mmu-miR-340-5p; mmu-miR-466b-3p; mmu-miR-30d; mmu-miR-296-5p; mmu-miR-30a; mmu-miR-28; mmu-miR-434-3p; mmu-miR-21; mmu-miR-155; mmu-miR-367; mmu-let-7a; mmu-miR-132; mmu-miR-34a; mmu-miR-30b; mmu-miR-191; mmu-miR-541; mmu-miR-468; mmu-miR-103; mmu-miR-182; mmu-miR-129-2-3p; mmu-miR-202-3p; mmu-miR-672; mmu-miR-1952; mmu-miR-129-1-3p; mmu-miR-…
Setd5	1.965	59	30.0254	mmu-miR-200a; mmu-miR-467e; mmu-miR-29b; mmu-miR-713; mmu-miR-467c; mmu-miR-150; mmu-miR-369-3p; mmu-miR-466b-3p; mmu-miR-30d; mmu-miR-291a-5p; mmu-miR-30a; mmu-miR-28; mmu-miR-669o-5p; mmu-miR-29c; mmu-miR-290-3p; mmu-miR-669f-3p; mmu-miR-367; mmu-miR-291b-5p; mmu-miR-132; mmu-miR-467a; mmu-miR-27a; mmu-miR-30b; mmu-miR-467h; mmu-miR-1983; mmu-miR-103; mmu-miR-421; mmu-miR-381; mmu-miR-292-3p; m…
Sf3a1	2.406	62	25.7689	mmu-miR-495; mmu-miR-804; mmu-miR-335-5p; mmu-miR-96; mmu-miR-130a; mmu-miR-200b; mmu-miR-466g; mmu-miR-431; mmu-miR-19a; mmu-miR-130b; mmu-miR-369-3p; mmu-miR-467f; mmu-miR-340-5p; mmu-miR-291a-5p; mmu-miR-28; mmu-miR-21; mmu-miR-291b-5p; mmu-let-7a; mmu-miR-182; mmu-miR-202-3p; mmu-miR-421; mmu-miR-381; mmu-miR-1952; mmu-miR-302a; mmu-miR-423-5p; mmu-miR-19b; mmu-miR-466a-3p; mmu-let-7g; mmu-mi…
Sfrp1	3.144	45	14.313	mmu-miR-93; mmu-miR-804; mmu-miR-713; mmu-miR-335-5p; mmu-miR-96; mmu-miR-20a; mmu-miR-340-5p; mmu-miR-296-5p; mmu-miR-291a-5p; mmu-miR-434-3p; mmu-miR-205; mmu-miR-543; mmu-miR-291b-5p; mmu-miR-669o-3p; mmu-miR-34a; mmu-miR-27a; mmu-miR-106a; mmu-miR-182; mmu-miR-129-2-3p; mmu-miR-17; mmu-miR-672; mmu-miR-129-1-3p; mmu-miR-669a-3p; mmu-miR-466a-3p; mmu-miR-124; mmu-miR-136; mmu-miR-125a-5p; mmu-…
Sfrp5	0.714	8	11.2045	mmu-miR-484; mmu-miR-150; mmu-miR-760-3p; mmu-miR-296-5p; mmu-miR-27a; mmu-miR-1935; mmu-miR-423-5p
Sgk3	2.429	68	27.9951	mmu-miR-200a; mmu-miR-495; mmu-miR-145; mmu-miR-335-5p; mmu-miR-96; mmu-miR-130a; mmu-miR-200b; mmu-miR-431; mmu-miR-130b; mmu-miR-467f; mmu-miR-340-5p; mmu-miR-466b-3p; mmu-miR-30d; mmu-miR-291a-5p; mmu-miR-30a; mmu-miR-669o-5p; mmu-miR-181a; mmu-miR-155; mmu-miR-291b-5p; mmu-let-7a; mmu-miR-132; mmu-miR-30b; mmu-miR-1198-5p; mmu-miR-182; mmu-miR-26b; mmu-miR-202-3p; mmu-miR-672; mmu-miR-154; mm…
Sgol1	1.814	43	23.7045	mmu-miR-142-3p; mmu-miR-495; mmu-miR-297c; mmu-miR-148b; mmu-miR-145; mmu-miR-669l; mmu-miR-804; mmu-miR-136; mmu-miR-374; mmu-miR-148a; mmu-miR-669f-5p; mmu-miR-484; mmu-miR-150; mmu-miR-369-3p; mmu-miR-18b; mmu-miR-466b-3p; mmu-miR-376c; mmu-miR-30d; mmu-miR-30a; mmu-miR-466c-3p; mmu-miR-152; mmu-miR-335-3p; mmu-miR-760-3p; mmu-miR-669a-5p; mmu-miR-376a; mmu-miR-22; mmu-miR-27a; mmu-miR-30b; mm…
Sgol2	1.1	15	13.6364	mmu-miR-466a-3p; mmu-miR-495; mmu-miR-467e; mmu-miR-350; mmu-miR-669f-3p; mmu-miR-467h; mmu-miR-669d; mmu-miR-541; mmu-miR-1952; mmu-miR-23b; mmu-miR-381; mmu-miR-376c; mmu-miR-23a; mmu-miR-292-5p; mmu-miR-410
Sgsh	3.819	76	19.9005	mmu-miR-804; mmu-miR-713; mmu-miR-96; mmu-miR-466g; mmu-miR-674; mmu-miR-466b-3p; mmu-miR-296-5p; mmu-miR-28; mmu-miR-181a; mmu-miR-205; mmu-let-7a; mmu-miR-34a; mmu-miR-27a; mmu-miR-103; mmu-miR-182; mmu-miR-129-2-3p; mmu-miR-202-3p; mmu-miR-672; mmu-miR-1952; mmu-miR-129-1-3p; mmu-miR-302a; mmu-miR-423-5p; mmu-let-7g; mmu-miR-195; mmu-miR-302d; mmu-miR-433; mmu-miR-350; mmu-miR-136; mmu-miR-125…
Sh3bgrl	2.309	53	22.9537	mmu-miR-495; mmu-miR-93; mmu-miR-804; mmu-miR-335-5p; mmu-miR-200b; mmu-miR-466g; mmu-miR-431; mmu-miR-19a; mmu-miR-150; mmu-miR-369-3p; mmu-miR-20a; mmu-miR-340-5p; mmu-miR-466b-3p; mmu-miR-669f-3p; mmu-miR-543; mmu-miR-132; mmu-miR-1198-5p; mmu-miR-106a; mmu-miR-17; mmu-miR-26b; mmu-miR-421; mmu-miR-19b; mmu-miR-429; mmu-miR-136; mmu-miR-872; mmu-miR-374; mmu-miR-20b; mmu-miR-23b; mmu-miR-1196;…
Sh3bp5	1.199	16	13.3445	mmu-miR-466a-3p; mmu-miR-434-3p; mmu-miR-291b-3p; mmu-miR-1196; mmu-miR-152; mmu-miR-142-3p; mmu-miR-205; mmu-miR-148b; mmu-miR-134; mmu-miR-136; mmu-miR-148a; mmu-miR-376b; mmu-miR-467f; mmu-miR-154; mmu-miR-762; mmu-miR-423-5p
Sh3gl2	1.627	51	31.346	mmu-miR-200a; mmu-miR-93; mmu-miR-804; mmu-miR-335-5p; mmu-miR-130a; mmu-miR-200b; mmu-miR-431; mmu-miR-130b; mmu-miR-20a; mmu-miR-467f; mmu-miR-30d; mmu-miR-323-3p; mmu-miR-30a; mmu-miR-669f-3p; mmu-miR-27a; mmu-miR-30b; mmu-miR-468; mmu-miR-106a; mmu-miR-103; mmu-miR-17; mmu-miR-302a; mmu-miR-423-5p; mmu-miR-466a-3p; mmu-miR-195; mmu-miR-302d; mmu-miR-1960; mmu-miR-429; mmu-miR-16; mmu-miR-20b;…
Sh3kbp1	4.903	97	19.7838	mmu-miR-145; mmu-miR-804; mmu-miR-335-5p; mmu-miR-96; mmu-miR-467c; mmu-miR-340-5p; mmu-miR-466b-3p; mmu-miR-296-5p; mmu-miR-323-3p; mmu-miR-28; mmu-miR-434-3p; mmu-miR-21; mmu-miR-290-3p; mmu-miR-468; mmu-miR-381; mmu-miR-292-3p; mmu-miR-154; mmu-miR-302a; mmu-miR-466a-3p; mmu-miR-302d; mmu-miR-195; mmu-miR-124; mmu-miR-148b; mmu-miR-669l; mmu-miR-136; mmu-miR-148a; mmu-miR-669f-5p; mmu-miR-295;…
Sh3pxd2b	4.612	76	16.4788	mmu-miR-200a; mmu-miR-495; mmu-miR-29b; mmu-miR-804; mmu-miR-96; mmu-miR-130a; mmu-miR-130b; mmu-miR-150; mmu-miR-296-5p; mmu-miR-28; mmu-miR-29c; mmu-miR-205; mmu-miR-543; mmu-miR-669o-3p; mmu-miR-27a; mmu-miR-468; mmu-miR-182; mmu-miR-421; mmu-miR-302a; mmu-miR-423-5p; mmu-miR-669a-3p; mmu-miR-302d; mmu-miR-195; mmu-miR-148b; mmu-miR-1960; mmu-miR-136; mmu-miR-16; mmu-miR-148a; mmu-miR-669d; mm…
Shcbp1	0.114	15	131.579	mmu-miR-434-3p; mmu-miR-350; mmu-miR-669f-3p; mmu-miR-93; mmu-miR-429; mmu-miR-200b; mmu-miR-106b; mmu-miR-106a; mmu-miR-20b; mmu-miR-17; mmu-miR-200c; mmu-miR-20a; mmu-miR-340-5p; mmu-miR-142-5p; mmu-miR-410
Shisa2	1.47	35	23.8095	mmu-miR-200a; mmu-miR-495; mmu-miR-467e; mmu-miR-335-5p; mmu-miR-467c; mmu-miR-205; mmu-miR-290-3p; mmu-miR-543; mmu-miR-34a; mmu-miR-467a; mmu-miR-27a; mmu-miR-467h; mmu-miR-672; mmu-miR-1952; mmu-miR-154; mmu-miR-292-3p; mmu-miR-302a; mmu-miR-195; mmu-miR-302d; mmu-miR-872; mmu-miR-16; mmu-miR-295; mmu-miR-291b-3p; mmu-miR-141; mmu-miR-330; mmu-miR-34c; mmu-miR-335-3p; mmu-miR-293; mmu-miR-15a;…
Shisa5	1.069	26	24.3218	mmu-miR-195; mmu-miR-148b; mmu-miR-124; mmu-miR-16; mmu-miR-148a; mmu-miR-1198-3p; mmu-miR-674; mmu-miR-23b; mmu-miR-377; mmu-miR-152; mmu-miR-132; mmu-miR-22; mmu-miR-378; mmu-miR-15a; mmu-miR-541; mmu-miR-1983; mmu-miR-329; mmu-miR-26b; mmu-miR-202-3p; mmu-miR-421; mmu-miR-33; mmu-miR-1952; mmu-miR-26a; mmu-miR-15b; mmu-miR-23a
Shmt1	1.04	8	7.69231	mmu-miR-467e; mmu-miR-136; mmu-miR-467h; mmu-miR-669d; mmu-miR-674; mmu-miR-154; mmu-miR-672; mmu-miR-762
Shroom1	0.671	8	11.9225	mmu-miR-669o-5p; mmu-miR-329; mmu-miR-200c; mmu-miR-429; mmu-miR-340-5p; mmu-miR-142-5p; mmu-miR-200b; mmu-miR-760-5p
Six1	1.708	36	21.0773	mmu-miR-195; mmu-miR-495; mmu-miR-467e; mmu-miR-350; mmu-miR-669l; mmu-miR-804; mmu-miR-872; mmu-miR-16; mmu-miR-669f-5p; mmu-miR-376c; mmu-miR-741; mmu-miR-101b; mmu-miR-669o-5p; mmu-miR-155; mmu-miR-205; mmu-miR-290-3p; mmu-miR-335-3p; mmu-miR-760-3p; mmu-miR-669a-5p; mmu-miR-467a; mmu-miR-15a; mmu-miR-1198-5p; mmu-miR-467h; mmu-miR-1952; mmu-miR-154; mmu-miR-292-3p; mmu-miR-33; mmu-miR-15b; mm…
Slc12a8	1.048	17	16.2214	mmu-miR-466a-3p; mmu-miR-142-3p; mmu-miR-804; mmu-miR-130a; mmu-miR-30b; mmu-miR-301a; mmu-miR-431; mmu-miR-183; mmu-miR-130b; mmu-miR-1983; mmu-miR-33; mmu-miR-1952; mmu-miR-30d; mmu-miR-1935; mmu-miR-323-3p; mmu-miR-30a
Slc16a1	2.74	80	29.1971	mmu-miR-200a; mmu-miR-495; mmu-miR-467e; mmu-miR-29b; mmu-miR-145; mmu-miR-713; mmu-miR-200b; mmu-miR-467c; mmu-miR-674; mmu-miR-340-5p; mmu-miR-466b-3p; mmu-miR-30d; mmu-miR-291a-5p; mmu-miR-323-3p; mmu-miR-30a; mmu-miR-28; mmu-miR-669o-5p; mmu-miR-29c; mmu-miR-155; mmu-miR-290-3p; mmu-miR-669f-3p; mmu-miR-367; mmu-miR-291b-5p; mmu-miR-467a; mmu-miR-27a; mmu-miR-30b; mmu-miR-467h; mmu-miR-421; m…
Slc16a3	2.736	46	16.8129	mmu-miR-200a; mmu-miR-495; mmu-miR-467e; mmu-miR-335-5p; mmu-miR-340-5p; mmu-miR-30d; mmu-miR-296-5p; mmu-miR-30a; mmu-miR-28; mmu-miR-21; mmu-miR-34a; mmu-miR-27a; mmu-miR-30b; mmu-miR-1198-5p; mmu-miR-467h; mmu-miR-468; mmu-miR-103; mmu-miR-182; mmu-miR-1983; mmu-miR-1952; mmu-miR-423-5p; mmu-miR-195; mmu-miR-136; mmu-miR-16; mmu-miR-760-5p; mmu-miR-484; mmu-miR-18b; mmu-miR-762; mmu-miR-376c; …
Slc22a7	0.296	5	16.8919	mmu-miR-669d; mmu-miR-484; mmu-miR-103; mmu-miR-134; mmu-miR-762
Slc25a24	1.947	26	13.3539	mmu-let-7g; mmu-miR-142-3p; mmu-miR-713; mmu-miR-136; mmu-miR-374; mmu-miR-466g; mmu-miR-19a; mmu-miR-291a-5p; mmu-let-7c; mmu-miR-101b; mmu-miR-434-3p; mmu-miR-335-3p; mmu-miR-669f-3p; mmu-let-7a; mmu-miR-132; mmu-miR-291b-5p; mmu-miR-293; mmu-miR-27a; mmu-miR-376b; mmu-let-7e; mmu-miR-26b; mmu-miR-421; mmu-miR-381; mmu-miR-1935; mmu-miR-26a; mmu-miR-19b
Slc25a3	0.98	36	36.7347	mmu-miR-93; mmu-miR-96; mmu-miR-130a; mmu-miR-19a; mmu-miR-130b; mmu-miR-150; mmu-miR-20a; mmu-miR-340-5p; mmu-miR-466b-3p; mmu-miR-296-5p; mmu-miR-291a-5p; mmu-miR-434-3p; mmu-miR-155; mmu-miR-291b-5p; mmu-miR-106a; mmu-miR-17; mmu-miR-19b; mmu-miR-433; mmu-miR-1960; mmu-miR-136; mmu-miR-125a-5p; mmu-miR-872; mmu-miR-760-5p; mmu-miR-20b; mmu-miR-484; mmu-miR-125b-5p; mmu-miR-376c; mmu-miR-291b-3…
Slc25a33	0.702	5	7.12251	mmu-miR-1983; mmu-miR-1224; mmu-miR-762; mmu-miR-136
Slc25a39	0.435	7	16.092	mmu-miR-142-3p; mmu-miR-290-3p; mmu-miR-292-3p; mmu-miR-467a; mmu-miR-431; mmu-miR-28; mmu-miR-151-5p
Slc26a10	0.112	1	8.92857	mmu-miR-132
Slc26a2	5.219	115	22.0349	mmu-miR-495; mmu-miR-145; mmu-miR-335-5p; mmu-miR-466g; mmu-miR-431; mmu-miR-467c; mmu-miR-19a; mmu-miR-340-5p; mmu-miR-466b-3p; mmu-miR-28; mmu-miR-434-3p; mmu-miR-290-3p; mmu-miR-155; mmu-miR-541; mmu-miR-468; mmu-miR-292-3p; mmu-miR-302a; mmu-miR-302d; mmu-miR-433; mmu-miR-148b; mmu-miR-669l; mmu-miR-1198-3p; mmu-miR-148a; mmu-miR-669f-5p; mmu-miR-295; mmu-miR-466c-3p; mmu-miR-34c; mmu-miR-330…
Slc2a1	0.884	23	26.0181	mmu-miR-195; mmu-miR-1960; mmu-miR-148b; mmu-miR-16; mmu-miR-760-5p; mmu-miR-431; mmu-miR-148a; mmu-miR-467f; mmu-miR-762; mmu-miR-291a-5p; mmu-miR-741; mmu-miR-152; mmu-miR-291b-5p; mmu-miR-22; mmu-miR-15a; mmu-miR-378; mmu-miR-182; mmu-miR-15b; mmu-miR-410
Slc2a3	2.122	48	22.6202	mmu-miR-467e; mmu-miR-93; mmu-miR-804; mmu-miR-20a; mmu-miR-466b-3p; mmu-miR-669o-5p; mmu-miR-205; mmu-miR-1198-5p; mmu-miR-467h; mmu-miR-541; mmu-miR-1983; mmu-miR-106a; mmu-miR-103; mmu-miR-17; mmu-miR-672; mmu-miR-1952; mmu-miR-195; mmu-miR-466a-3p; mmu-miR-142-3p; mmu-miR-148b; mmu-miR-1960; mmu-miR-297c; mmu-miR-872; mmu-miR-16; mmu-miR-148a; mmu-miR-669d; mmu-miR-484; mmu-miR-20b; mmu-miR-4…
Slc30a1	3.492	85	24.3414	mmu-miR-200a; mmu-miR-495; mmu-miR-145; mmu-miR-93; mmu-miR-804; mmu-miR-19a; mmu-miR-20a; mmu-miR-467f; mmu-miR-466b-3p; mmu-miR-291a-5p; mmu-miR-181a; mmu-miR-205; mmu-miR-155; mmu-miR-669f-3p; mmu-miR-543; mmu-miR-291b-5p; mmu-let-7a; mmu-miR-669o-3p; mmu-miR-191; mmu-miR-468; mmu-miR-182; mmu-miR-106a; mmu-miR-103; mmu-miR-17; mmu-miR-26b; mmu-miR-202-3p; mmu-miR-381; mmu-miR-1952; mmu-miR-19…
Slc30a4	3.946	92	23.3147	mmu-miR-467e; mmu-miR-29b; mmu-miR-145; mmu-miR-93; mmu-miR-804; mmu-miR-713; mmu-miR-130a; mmu-miR-466g; mmu-miR-431; mmu-miR-130b; mmu-miR-20a; mmu-miR-340-5p; mmu-miR-30d; mmu-miR-30a; mmu-miR-669o-5p; mmu-miR-181a; mmu-miR-29c; mmu-miR-155; mmu-miR-543; mmu-miR-132; mmu-miR-27a; mmu-miR-30b; mmu-miR-1198-5p; mmu-miR-467h; mmu-miR-182; mmu-miR-106a; mmu-miR-103; mmu-miR-17; mmu-miR-129-2-3p; m…
Slc35a4	0.768	24	31.25	mmu-miR-302d; mmu-miR-29b; mmu-miR-124; mmu-miR-125a-5p; mmu-miR-467c; mmu-miR-150; mmu-miR-295; mmu-miR-125b-5p; mmu-miR-762; mmu-miR-1196; mmu-miR-291b-3p; mmu-miR-290-3p; mmu-miR-29a; mmu-miR-29c; mmu-miR-467a; mmu-miR-378; mmu-miR-532-5p; mmu-miR-291a-3p; mmu-miR-421; mmu-miR-33; mmu-miR-292-3p; mmu-miR-302a; mmu-miR-423-5p; mmu-miR-294
Slc35e4	0.53	12	22.6415	mmu-let-7g; mmu-miR-124; mmu-let-7a; mmu-miR-423-3p; mmu-let-7e; mmu-miR-329; mmu-miR-202-3p; mmu-miR-142-5p; mmu-miR-1952; mmu-let-7c; mmu-miR-741; mmu-miR-377
Slc35f2	1.19	44	36.9748	mmu-miR-29b; mmu-miR-713; mmu-miR-369-3p; mmu-miR-467f; mmu-miR-340-5p; mmu-miR-466b-3p; mmu-miR-30d; mmu-miR-323-3p; mmu-miR-30a; mmu-miR-29c; mmu-miR-367; mmu-miR-34a; mmu-miR-27a; mmu-miR-30b; mmu-miR-468; mmu-miR-103; mmu-miR-129-2-3p; mmu-miR-381; mmu-miR-129-1-3p; mmu-miR-302a; mmu-miR-195; mmu-miR-302d; mmu-miR-32; mmu-miR-350; mmu-miR-148b; mmu-miR-1960; mmu-miR-16; mmu-miR-148a; mmu-miR-…
Slc39a8	1.618	34	21.0136	mmu-miR-495; mmu-miR-93; mmu-miR-713; mmu-miR-431; mmu-miR-150; mmu-miR-369-3p; mmu-miR-20a; mmu-miR-291a-5p; mmu-miR-181a; mmu-miR-21; mmu-miR-291b-5p; mmu-miR-669o-3p; mmu-miR-1198-5p; mmu-miR-106a; mmu-miR-1983; mmu-miR-17; mmu-miR-672; mmu-miR-1952; mmu-miR-669a-3p; mmu-miR-433; mmu-miR-124; mmu-miR-297c; mmu-miR-125a-5p; mmu-miR-20b; mmu-miR-125b-5p; mmu-miR-330; mmu-miR-106b; mmu-miR-532-5p…
Slc3a2	0.841	8	9.51249	mmu-miR-669d; mmu-miR-466c-3p; mmu-miR-297c; mmu-miR-134; mmu-miR-804; mmu-miR-466b-3p; mmu-miR-297a; mmu-miR-431
Slc40a1	1.338	33	24.6637	mmu-miR-350; mmu-miR-297c; mmu-miR-669l; mmu-miR-125a-5p; mmu-miR-466g; mmu-miR-669f-5p; mmu-miR-150; mmu-miR-674; mmu-miR-125b-5p; mmu-miR-30d; mmu-miR-741; mmu-miR-323-3p; mmu-miR-30a; mmu-miR-28; mmu-miR-101b; mmu-miR-669o-5p; mmu-miR-330; mmu-miR-205; mmu-miR-760-3p; mmu-miR-669a-5p; mmu-miR-382; mmu-miR-1198-5p; mmu-miR-30b; mmu-miR-1983; mmu-miR-1224; mmu-miR-33; mmu-miR-154; mmu-miR-297a; …
Slc43a3	0.725	11	15.1724	mmu-miR-34c; mmu-miR-291b-5p; mmu-miR-34a; mmu-miR-22; mmu-miR-669d; mmu-miR-468; mmu-miR-129-2-3p; mmu-miR-129-1-3p; mmu-miR-376c; mmu-miR-291a-5p; mmu-miR-410
Slc4a2	0.198	5	25.2525	mmu-miR-378; mmu-miR-296-5p; mmu-miR-760-5p; mmu-miR-423-5p
Slc4a7	3.785	99	26.1559	mmu-miR-495; mmu-miR-93; mmu-miR-431; mmu-miR-19a; mmu-miR-20a; mmu-miR-340-5p; mmu-miR-466b-3p; mmu-miR-30d; mmu-miR-323-3p; mmu-miR-30a; mmu-miR-28; mmu-miR-434-3p; mmu-miR-29c; mmu-miR-669f-3p; mmu-miR-367; mmu-let-7a; mmu-miR-468; mmu-miR-106a; mmu-miR-17; mmu-miR-202-3p; mmu-miR-381; mmu-miR-669a-3p; mmu-miR-466a-3p; mmu-let-7g; mmu-miR-195; mmu-miR-433; mmu-miR-124; mmu-miR-20b; mmu-miR-23b…
Slc7a8	1.878	46	24.4941	mmu-miR-467e; mmu-miR-93; mmu-miR-713; mmu-miR-150; mmu-miR-674; mmu-miR-20a; mmu-miR-296-5p; mmu-miR-205; mmu-miR-669f-3p; mmu-miR-467h; mmu-miR-106a; mmu-miR-129-2-3p; mmu-miR-17; mmu-miR-1952; mmu-miR-129-1-3p; mmu-miR-302a; mmu-miR-302d; mmu-miR-124; mmu-miR-1960; mmu-miR-125a-5p; mmu-miR-1198-3p; mmu-miR-20b; mmu-miR-295; mmu-miR-125b-5p; mmu-miR-18b; mmu-miR-762; mmu-miR-330; mmu-miR-335-3p…
Slco3a1	2.432	48	19.7368	mmu-miR-495; mmu-miR-96; mmu-miR-200b; mmu-miR-466g; mmu-miR-340-5p; mmu-miR-466b-3p; mmu-miR-323-3p; mmu-miR-155; mmu-miR-205; mmu-miR-1198-5p; mmu-miR-541; mmu-miR-468; mmu-miR-1983; mmu-miR-129-2-3p; mmu-miR-26b; mmu-miR-421; mmu-miR-129-1-3p; mmu-miR-423-5p; mmu-miR-466a-3p; mmu-miR-433; mmu-miR-124; mmu-miR-297c; mmu-miR-669l; mmu-miR-429; mmu-miR-136; mmu-miR-669f-5p; mmu-miR-18b; mmu-miR-7…
Slit2	3.492	72	20.6186	mmu-miR-495; mmu-miR-145; mmu-miR-200b; mmu-miR-466g; mmu-miR-19a; mmu-miR-150; mmu-miR-466b-3p; mmu-miR-21; mmu-miR-669f-3p; mmu-miR-132; mmu-miR-669o-3p; mmu-miR-34a; mmu-miR-1198-5p; mmu-miR-541; mmu-miR-468; mmu-miR-129-2-3p; mmu-miR-26b; mmu-miR-1952; mmu-miR-129-1-3p; mmu-miR-19b; mmu-miR-669a-3p; mmu-miR-195; mmu-miR-142-3p; mmu-miR-297c; mmu-miR-124; mmu-miR-148b; mmu-miR-1960; mmu-miR-42…
Slit3	0.365	4	10.9589	mmu-miR-340-5p; mmu-miR-1935; mmu-miR-292-5p
Slpi	0.244	5	20.4918	mmu-miR-760-3p; mmu-miR-125b-5p; mmu-miR-378; mmu-miR-125a-5p; mmu-miR-423-3p
Sltm	0.55	21	38.1818	mmu-miR-200a; mmu-miR-1960; mmu-miR-148b; mmu-miR-429; mmu-miR-872; mmu-miR-200b; mmu-miR-148a; mmu-miR-369-3p; mmu-miR-340-5p; mmu-miR-466b-3p; mmu-miR-377; mmu-miR-101b; mmu-miR-466c-3p; mmu-miR-141; mmu-miR-152; mmu-miR-132; mmu-miR-200c; mmu-miR-154; mmu-miR-142-5p; mmu-miR-421
Slu7	1.79	32	17.8771	mmu-miR-195; mmu-let-7g; mmu-miR-495; mmu-miR-467e; mmu-miR-297c; mmu-miR-335-5p; mmu-miR-16; mmu-miR-376c; mmu-let-7c; mmu-miR-377; mmu-miR-28; mmu-miR-434-3p; mmu-miR-181a; mmu-miR-205; mmu-miR-760-3p; mmu-let-7a; mmu-miR-15a; mmu-miR-27a; mmu-miR-1198-5p; mmu-miR-467h; mmu-miR-103; mmu-let-7e; mmu-miR-33; mmu-miR-297a; mmu-miR-15b; mmu-miR-292-5p; mmu-miR-466f
Smarca5	2.556	68	26.6041	mmu-miR-200a; mmu-miR-467e; mmu-miR-145; mmu-miR-93; mmu-miR-200b; mmu-miR-431; mmu-miR-19a; mmu-miR-150; mmu-miR-674; mmu-miR-369-3p; mmu-miR-20a; mmu-miR-340-5p; mmu-miR-466b-3p; mmu-miR-323-3p; mmu-miR-669o-5p; mmu-miR-543; mmu-miR-34a; mmu-miR-1198-5p; mmu-miR-467h; mmu-miR-106a; mmu-miR-103; mmu-miR-17; mmu-miR-672; mmu-miR-381; mmu-miR-1952; mmu-miR-19b; mmu-miR-195; mmu-miR-350; mmu-miR-19…
Smarcd3	0.129	3	23.2558	mmu-miR-760-3p; mmu-miR-762; mmu-miR-378
Smc1b	0.271	8	29.5203	mmu-let-7g; mmu-let-7a; mmu-miR-183; mmu-let-7e; mmu-miR-376b; mmu-miR-202-3p; mmu-miR-340-5p; mmu-let-7c
Smc2	1.605	46	28.6604	mmu-miR-93; mmu-miR-200b; mmu-miR-20a; mmu-miR-340-5p; mmu-miR-466b-3p; mmu-miR-296-5p; mmu-miR-181a; mmu-miR-669f-3p; mmu-miR-543; mmu-miR-1198-5p; mmu-miR-106a; mmu-miR-17; mmu-miR-26b; mmu-miR-381; mmu-miR-1952; mmu-miR-302a; mmu-miR-302d; mmu-miR-466a-3p; mmu-miR-124; mmu-miR-429; mmu-miR-374; mmu-miR-20b; mmu-miR-295; mmu-miR-23b; mmu-miR-377; mmu-miR-466c-3p; mmu-miR-335-3p; mmu-miR-106b; m…
Smek2	2.246	63	28.0499	mmu-miR-495; mmu-miR-467e; mmu-miR-29b; mmu-miR-466g; mmu-miR-431; mmu-miR-467c; mmu-miR-467f; mmu-miR-466b-3p; mmu-miR-30d; mmu-miR-30a; mmu-miR-669o-5p; mmu-miR-181a; mmu-miR-29c; mmu-miR-155; mmu-miR-290-3p; mmu-miR-543; mmu-miR-669o-3p; mmu-miR-467a; mmu-miR-30b; mmu-miR-467h; mmu-miR-468; mmu-miR-103; mmu-miR-381; mmu-miR-292-3p; mmu-miR-302a; mmu-miR-669a-3p; mmu-miR-302d; mmu-miR-124; mmu-…
Smpd2	0.619	15	24.2326	mmu-miR-195; mmu-miR-297c; mmu-miR-760-3p; mmu-miR-27a; mmu-miR-15a; mmu-miR-16; mmu-miR-760-5p; mmu-miR-193b; mmu-miR-103; mmu-miR-129-2-3p; mmu-miR-1224; mmu-miR-762; mmu-miR-297a; mmu-miR-129-1-3p; mmu-miR-15b
Smpdl3b	0.428	9	21.028	mmu-miR-93; mmu-miR-106b; mmu-miR-19a; mmu-miR-106a; mmu-miR-20b; mmu-miR-17; mmu-miR-20a; mmu-miR-19b; mmu-miR-741
Smtnl2	2.123	31	14.602	mmu-miR-96; mmu-miR-760-5p; mmu-miR-466g; mmu-miR-669d; mmu-miR-484; mmu-miR-674; mmu-miR-291a-5p; mmu-miR-741; mmu-miR-323-3p; mmu-miR-1945; mmu-miR-330; mmu-miR-34c; mmu-miR-760-3p; mmu-miR-132; mmu-miR-291b-5p; mmu-miR-22; mmu-miR-34a; mmu-miR-27a; mmu-miR-541; mmu-miR-182; mmu-miR-103; mmu-miR-672; mmu-miR-381; mmu-miR-1935
Snai1	0.731	29	39.6717	mmu-miR-32; mmu-let-7g; mmu-miR-124; mmu-miR-429; mmu-miR-200b; mmu-miR-125a-5p; mmu-miR-363-3p; mmu-miR-125b-5p; mmu-miR-30d; mmu-miR-296-5p; mmu-let-7c; mmu-miR-30a; mmu-miR-330; mmu-miR-34c; mmu-miR-760-3p; mmu-miR-367; mmu-let-7a; mmu-miR-34a; mmu-miR-30b; mmu-miR-25; mmu-let-7e; mmu-miR-200c; mmu-miR-381; mmu-miR-423-5p; mmu-miR-410
Snai2	1.099	30	27.2975	mmu-miR-466a-3p; mmu-miR-200a; mmu-miR-142-3p; mmu-miR-350; mmu-miR-124; mmu-miR-429; mmu-miR-96; mmu-miR-200b; mmu-miR-669d; mmu-miR-674; mmu-miR-467f; mmu-miR-340-5p; mmu-miR-23b; mmu-miR-466b-3p; mmu-miR-376c; mmu-miR-30d; mmu-miR-323-3p; mmu-miR-30a; mmu-miR-466c-3p; mmu-miR-141; mmu-miR-181a; mmu-miR-335-3p; mmu-miR-30b; mmu-miR-182; mmu-miR-200c; mmu-miR-1935; mmu-miR-23a; mmu-miR-423-5p
Snrk	2.299	74	32.1879	mmu-miR-200a; mmu-miR-467e; mmu-miR-93; mmu-miR-713; mmu-miR-467c; mmu-miR-674; mmu-miR-20a; mmu-miR-467f; mmu-miR-323-3p; mmu-miR-28; mmu-miR-21; mmu-miR-290-3p; mmu-miR-669f-3p; mmu-miR-367; mmu-miR-467a; mmu-miR-27a; mmu-miR-467h; mmu-miR-106a; mmu-miR-103; mmu-miR-1983; mmu-miR-17; mmu-miR-421; mmu-miR-381; mmu-miR-292-3p; mmu-miR-1952; mmu-miR-302a; mmu-miR-195; mmu-miR-302d; mmu-miR-32; mmu…
Snx30	5.77	153	26.5165	mmu-miR-495; mmu-miR-145; mmu-miR-93; mmu-miR-713; mmu-miR-96; mmu-miR-19a; mmu-miR-20a; mmu-miR-340-5p; mmu-miR-466b-3p; mmu-miR-30d; mmu-miR-296-5p; mmu-miR-30a; mmu-miR-155; mmu-miR-669f-3p; mmu-miR-367; mmu-let-7a; mmu-miR-106a; mmu-miR-17; mmu-miR-202-3p; mmu-miR-672; mmu-miR-302a; mmu-miR-302d; mmu-let-7g; mmu-miR-433; mmu-miR-124; mmu-miR-148b; mmu-miR-669l; mmu-miR-136; mmu-miR-125a-5p; m…
Snx5	1.059	26	24.5515	mmu-miR-200a; mmu-miR-350; mmu-miR-1960; mmu-miR-136; mmu-miR-374; mmu-miR-125a-5p; mmu-miR-760-5p; mmu-miR-466g; mmu-miR-19a; mmu-miR-369-3p; mmu-miR-340-5p; mmu-miR-125b-5p; mmu-miR-741; mmu-miR-141; mmu-miR-335-3p; mmu-miR-760-3p; mmu-miR-134; mmu-miR-22; mmu-miR-541; mmu-miR-129-2-3p; mmu-miR-142-5p; mmu-miR-129-1-3p; mmu-miR-1935; mmu-miR-410; mmu-miR-19b
Snx7	0.652	11	16.8712	mmu-miR-466c-3p; mmu-miR-467e; mmu-miR-335-3p; mmu-miR-713; mmu-miR-1198-5p; mmu-miR-467h; mmu-miR-421; mmu-miR-466b-3p; mmu-miR-741
Snx9	0.416	3	7.21154	mmu-miR-669d; mmu-miR-335-3p; mmu-miR-410
Soat2	0.775	29	37.4194	mmu-miR-195; mmu-let-7g; mmu-miR-148b; mmu-miR-335-5p; mmu-miR-16; mmu-miR-125a-5p; mmu-miR-148a; mmu-miR-19a; mmu-miR-125b-5p; mmu-let-7c; mmu-miR-34c; mmu-miR-152; mmu-miR-330; mmu-miR-760-3p; mmu-let-7a; mmu-miR-34a; mmu-miR-15a; mmu-miR-541; mmu-miR-103; mmu-let-7e; mmu-miR-202-3p; mmu-miR-1935; mmu-miR-15b; mmu-miR-19b
Socs2	1.163	12	10.3181	mmu-miR-495; mmu-miR-335-3p; mmu-miR-291b-5p; mmu-miR-804; mmu-miR-713; mmu-miR-22; mmu-miR-1198-3p; mmu-miR-19a; mmu-miR-468; mmu-miR-421; mmu-miR-291a-5p; mmu-miR-19b
Socs5	2.339	78	33.3476	mmu-miR-466g; mmu-miR-467c; mmu-miR-19a; mmu-miR-466b-3p; mmu-miR-30d; mmu-miR-30a; mmu-miR-434-3p; mmu-miR-21; mmu-miR-290-3p; mmu-miR-669f-3p; mmu-miR-367; mmu-miR-381; mmu-miR-292-3p; mmu-miR-154; mmu-miR-302a; mmu-miR-669a-3p; mmu-miR-302d; mmu-miR-195; mmu-miR-124; mmu-miR-148b; mmu-miR-760-5p; mmu-miR-148a; mmu-miR-295; mmu-miR-720; mmu-miR-466c-3p; mmu-miR-330; mmu-miR-152; mmu-miR-15a; mm…
Sox13	1.622	34	20.9618	mmu-miR-433; mmu-miR-29b; mmu-miR-136; mmu-miR-125a-5p; mmu-miR-431; mmu-miR-125b-5p; mmu-miR-376c; mmu-miR-30d; mmu-miR-296-5p; mmu-miR-741; mmu-miR-30a; mmu-miR-28; mmu-miR-434-3p; mmu-miR-34c; mmu-miR-330; mmu-miR-181a; mmu-miR-29a; mmu-miR-29c; mmu-miR-760-3p; mmu-miR-34a; mmu-miR-1893; mmu-miR-22; mmu-miR-293; mmu-miR-30b; mmu-miR-468; mmu-miR-129-2-3p; mmu-miR-329; mmu-miR-1935; mmu-miR-129…
Sox17	0.785	20	25.4777	mmu-miR-145; mmu-miR-669l; mmu-miR-669f-5p; mmu-miR-674; mmu-miR-467f; mmu-miR-291a-5p; mmu-miR-181a; mmu-miR-335-3p; mmu-miR-134; mmu-miR-291b-5p; mmu-miR-669a-5p; mmu-miR-382; mmu-miR-532-5p; mmu-miR-329; mmu-miR-142-5p; mmu-miR-381; mmu-miR-421; mmu-miR-292-5p; mmu-miR-410; mmu-miR-423-5p
Sox18	0.367	6	16.3488	mmu-miR-297c; mmu-miR-329; mmu-miR-22; mmu-miR-1952; mmu-miR-297a; mmu-miR-1935
Sox2	1.086	19	17.4954	mmu-miR-466a-3p; mmu-miR-145; mmu-miR-429; mmu-miR-200b; mmu-miR-760-5p; mmu-miR-466g; mmu-miR-431; mmu-miR-150; mmu-miR-340-5p; mmu-miR-21; mmu-miR-335-3p; mmu-miR-132; mmu-miR-669f-3p; mmu-miR-382; mmu-miR-182; mmu-miR-200c; mmu-miR-292-5p
Sox21	1.573	29	18.4361	mmu-miR-297c; mmu-miR-145; mmu-miR-669d; mmu-miR-19a; mmu-miR-150; mmu-miR-340-5p; mmu-miR-376c; mmu-miR-291a-5p; mmu-miR-741; mmu-miR-434-3p; mmu-miR-21; mmu-miR-330; mmu-miR-335-3p; mmu-miR-760-3p; mmu-miR-291b-5p; mmu-miR-1893; mmu-miR-382; mmu-miR-1198-5p; mmu-miR-423-3p; mmu-miR-1983; mmu-miR-103; mmu-miR-142-5p; mmu-miR-1935; mmu-miR-297a; mmu-miR-423-5p; mmu-miR-19b
Sox4	2.78	65	23.3813	mmu-miR-29b; mmu-miR-93; mmu-miR-96; mmu-miR-19a; mmu-miR-674; mmu-miR-369-3p; mmu-miR-20a; mmu-miR-340-5p; mmu-miR-30d; mmu-miR-30a; mmu-miR-29c; mmu-miR-205; mmu-miR-669f-3p; mmu-miR-1893; mmu-miR-27a; mmu-miR-30b; mmu-miR-1198-5p; mmu-miR-541; mmu-miR-182; mmu-miR-106a; mmu-miR-17; mmu-miR-19b; mmu-miR-297c; mmu-miR-669l; mmu-miR-136; mmu-miR-374; mmu-miR-760-5p; mmu-miR-669f-5p; mmu-miR-20b; …
Sp5	0.56	11	19.6429	mmu-miR-495; mmu-miR-335-3p; mmu-miR-335-5p; mmu-miR-374; mmu-miR-466g; mmu-miR-431; mmu-miR-150; mmu-miR-18b; mmu-miR-762; mmu-miR-151-5p
Sp8	2.706	58	21.4339	mmu-miR-200a; mmu-miR-145; mmu-miR-93; mmu-miR-96; mmu-miR-466g; mmu-miR-467c; mmu-miR-20a; mmu-miR-466b-3p; mmu-miR-30d; mmu-miR-291a-5p; mmu-miR-30a; mmu-miR-434-3p; mmu-miR-155; mmu-miR-291b-5p; mmu-let-7a; mmu-miR-669o-3p; mmu-miR-30b; mmu-miR-191; mmu-miR-182; mmu-miR-106a; mmu-miR-103; mmu-miR-17; mmu-miR-421; mmu-miR-381; mmu-miR-669a-3p; mmu-let-7g; mmu-miR-195; mmu-miR-142-3p; mmu-miR-19…
Sparc	1.085	18	16.5899	mmu-miR-433; mmu-miR-200a; mmu-miR-335-5p; mmu-miR-466g; mmu-miR-23b; mmu-miR-18b; mmu-miR-376c; mmu-miR-323-3p; mmu-miR-151-5p; mmu-miR-141; mmu-miR-335-3p; mmu-miR-191; mmu-miR-1224; mmu-miR-142-5p; mmu-miR-33; mmu-miR-1935; mmu-miR-23a
Specc1	3.655	80	21.8878	mmu-miR-804; mmu-miR-713; mmu-miR-96; mmu-miR-466g; mmu-miR-466b-3p; mmu-miR-30d; mmu-miR-30a; mmu-miR-28; mmu-miR-434-3p; mmu-miR-21; mmu-miR-669f-3p; mmu-let-7a; mmu-miR-191; mmu-miR-541; mmu-miR-468; mmu-miR-129-2-3p; mmu-miR-202-3p; mmu-miR-129-1-3p; mmu-miR-466a-3p; mmu-let-7g; mmu-miR-124; mmu-miR-136; mmu-miR-125a-5p; mmu-miR-1198-3p; mmu-miR-125b-5p; mmu-miR-23b; mmu-miR-466c-3p; mmu-miR-…
Spint1	0.565	16	28.3186	mmu-miR-434-3p; mmu-let-7g; mmu-miR-34c; mmu-miR-205; mmu-miR-669f-3p; mmu-let-7a; mmu-miR-34a; mmu-miR-431; mmu-miR-193b; mmu-let-7e; mmu-miR-182; mmu-miR-674; mmu-miR-296-5p; mmu-let-7c; mmu-miR-101b
Spint2	0.34	11	32.3529	mmu-miR-1960; mmu-miR-93; mmu-miR-1198-5p; mmu-miR-106b; mmu-miR-106a; mmu-miR-20b; mmu-miR-17; mmu-miR-20a; mmu-miR-142-5p; mmu-miR-762
Spn	2.444	49	20.0491	mmu-miR-467e; mmu-miR-29b; mmu-miR-804; mmu-miR-467c; mmu-miR-19a; mmu-miR-150; mmu-miR-296-5p; mmu-miR-28; mmu-miR-29c; mmu-miR-205; mmu-let-7a; mmu-miR-27a; mmu-miR-467h; mmu-miR-541; mmu-miR-1983; mmu-miR-202-3p; mmu-miR-19b; mmu-let-7g; mmu-miR-124; mmu-miR-669l; mmu-miR-760-5p; mmu-miR-669d; mmu-miR-669f-5p; mmu-miR-484; mmu-miR-18b; mmu-miR-762; mmu-let-7c; mmu-miR-101b; mmu-miR-127; mmu-mi…
Spp1	0.432	18	41.6667	mmu-miR-466c-3p; mmu-miR-466a-3p; mmu-miR-291b-3p; mmu-miR-141; mmu-miR-200a; mmu-miR-181a; mmu-miR-93; mmu-miR-106b; mmu-miR-106a; mmu-miR-20b; mmu-miR-17; mmu-miR-20a; mmu-miR-340-5p; mmu-miR-33; mmu-miR-466b-3p; mmu-miR-377
Spry2	0.854	19	22.2482	mmu-miR-32; mmu-miR-350; mmu-miR-96; mmu-miR-872; mmu-miR-466g; mmu-miR-363-3p; mmu-miR-101b; mmu-miR-181a; mmu-miR-669o-5p; mmu-miR-335-3p; mmu-miR-367; mmu-miR-669f-3p; mmu-miR-376a; mmu-miR-382; mmu-miR-183; mmu-miR-25; mmu-miR-541; mmu-miR-421
Spry4	3.538	58	16.3934	mmu-miR-145; mmu-miR-93; mmu-miR-713; mmu-miR-150; mmu-miR-369-3p; mmu-miR-20a; mmu-miR-466b-3p; mmu-miR-30d; mmu-miR-296-5p; mmu-miR-30a; mmu-miR-669o-5p; mmu-miR-290-3p; mmu-miR-34a; mmu-miR-467a; mmu-miR-27a; mmu-miR-30b; mmu-miR-191; mmu-miR-106a; mmu-miR-182; mmu-miR-17; mmu-miR-421; mmu-miR-292-3p; mmu-miR-1952; mmu-miR-423-5p; mmu-miR-466a-3p; mmu-miR-195; mmu-miR-1960; mmu-miR-350; mmu-mi…
Sqrdl	0.266	4	15.0376	mmu-miR-205; mmu-miR-145; mmu-miR-202-3p; mmu-miR-376c
Srgap3	4.817	66	13.7015	mmu-miR-495; mmu-miR-713; mmu-miR-335-5p; mmu-miR-96; mmu-miR-19a; mmu-miR-150; mmu-miR-674; mmu-miR-340-5p; mmu-miR-296-5p; mmu-miR-323-3p; mmu-miR-290-3p; mmu-miR-205; mmu-miR-367; mmu-miR-132; mmu-miR-34a; mmu-miR-467a; mmu-miR-191; mmu-miR-103; mmu-miR-182; mmu-miR-292-3p; mmu-miR-1952; mmu-miR-19b; mmu-miR-32; mmu-miR-142-3p; mmu-miR-350; mmu-miR-124; mmu-miR-148b; mmu-miR-1960; mmu-miR-297c…
Srm	0.312	5	16.0256	mmu-miR-141; mmu-miR-468; mmu-miR-200a; mmu-miR-340-5p; mmu-miR-27a
Srp68	0.537	9	16.7598	mmu-miR-669o-5p; mmu-miR-145; mmu-miR-134; mmu-miR-760-5p; mmu-miR-669d; mmu-miR-468; mmu-miR-484; mmu-miR-1935; mmu-miR-296-5p
Srpr	0.948	27	28.481	mmu-miR-32; mmu-miR-195; mmu-let-7g; mmu-miR-335-5p; mmu-miR-374; mmu-miR-16; mmu-miR-363-3p; mmu-miR-150; mmu-let-7c; mmu-miR-741; mmu-miR-28; mmu-miR-34c; mmu-miR-330; mmu-miR-335-3p; mmu-miR-760-3p; mmu-miR-367; mmu-let-7a; mmu-miR-34a; mmu-miR-15a; mmu-miR-25; mmu-let-7e; mmu-miR-1983; mmu-miR-1935; mmu-miR-15b; mmu-miR-292-5p; mmu-miR-410
Srxn1	2.184	36	16.4835	mmu-miR-29b; mmu-miR-96; mmu-miR-130a; mmu-miR-200b; mmu-miR-19a; mmu-miR-130b; mmu-miR-674; mmu-miR-434-3p; mmu-miR-29c; mmu-miR-205; mmu-miR-367; mmu-miR-1198-5p; mmu-miR-672; mmu-miR-423-5p; mmu-miR-19b; mmu-miR-32; mmu-miR-148b; mmu-miR-1960; mmu-miR-429; mmu-miR-1198-3p; mmu-miR-148a; mmu-miR-669d; mmu-miR-363-3p; mmu-miR-484; mmu-miR-376c; mmu-miR-762; mmu-miR-101b; mmu-miR-152; mmu-miR-29a…
Ss18l1	2.843	67	23.5667	mmu-miR-467e; mmu-miR-29b; mmu-miR-93; mmu-miR-713; mmu-miR-200b; mmu-miR-466g; mmu-miR-150; mmu-miR-674; mmu-miR-369-3p; mmu-miR-20a; mmu-miR-467f; mmu-miR-340-5p; mmu-miR-28; mmu-miR-434-3p; mmu-miR-181a; mmu-miR-29c; mmu-miR-669f-3p; mmu-miR-543; mmu-miR-126-3p; mmu-miR-27a; mmu-miR-467h; mmu-miR-106a; mmu-miR-103; mmu-miR-182; mmu-miR-129-2-3p; mmu-miR-17; mmu-miR-381; mmu-miR-129-1-3p; mmu-m…
Ssbp2	2.734	73	26.7008	mmu-miR-495; mmu-miR-29b; mmu-miR-93; mmu-miR-804; mmu-miR-335-5p; mmu-miR-130a; mmu-miR-130b; mmu-miR-20a; mmu-miR-340-5p; mmu-miR-30d; mmu-miR-30a; mmu-miR-29c; mmu-miR-155; mmu-miR-669f-3p; mmu-miR-543; mmu-miR-367; mmu-miR-669o-3p; mmu-miR-27a; mmu-miR-30b; mmu-miR-191; mmu-miR-468; mmu-miR-1983; mmu-miR-106a; mmu-miR-103; mmu-miR-17; mmu-miR-26b; mmu-miR-381; mmu-miR-423-5p; mmu-miR-669a-3p;…
St13	1.781	50	28.0741	mmu-miR-495; mmu-miR-93; mmu-miR-804; mmu-miR-200b; mmu-miR-369-3p; mmu-miR-20a; mmu-miR-340-5p; mmu-miR-466b-3p; mmu-miR-434-3p; mmu-miR-155; mmu-miR-669f-3p; mmu-miR-106a; mmu-miR-129-2-3p; mmu-miR-17; mmu-miR-129-1-3p; mmu-miR-466a-3p; mmu-miR-195; mmu-miR-142-3p; mmu-miR-433; mmu-miR-350; mmu-miR-429; mmu-miR-136; mmu-miR-16; mmu-miR-374; mmu-miR-760-5p; mmu-miR-20b; mmu-miR-376c; mmu-miR-101…
St3gal5	0.901	33	36.626	mmu-miR-195; mmu-miR-200a; mmu-miR-495; mmu-miR-93; mmu-miR-16; mmu-miR-19a; mmu-miR-20b; mmu-miR-20a; mmu-miR-141; mmu-miR-290-3p; mmu-miR-22; mmu-miR-467a; mmu-miR-15a; mmu-miR-106b; mmu-miR-106a; mmu-miR-129-2-3p; mmu-miR-17; mmu-miR-672; mmu-miR-381; mmu-miR-292-3p; mmu-miR-129-1-3p; mmu-miR-1935; mmu-miR-15b; mmu-miR-466f; mmu-miR-19b
St6gal1	2.48	52	20.9677	mmu-miR-495; mmu-miR-145; mmu-miR-335-5p; mmu-miR-96; mmu-miR-130a; mmu-miR-466g; mmu-miR-130b; mmu-miR-674; mmu-miR-30d; mmu-miR-30a; mmu-miR-205; mmu-miR-132; mmu-miR-30b; mmu-miR-103; mmu-miR-182; mmu-miR-26b; mmu-miR-433; mmu-miR-124; mmu-miR-148b; mmu-miR-1960; mmu-miR-136; mmu-miR-125a-5p; mmu-miR-374; mmu-miR-148a; mmu-miR-125b-5p; mmu-miR-18b; mmu-miR-762; mmu-miR-741; mmu-miR-377; mmu-mi…
Stag3	0.423	13	30.7329	mmu-miR-34c; mmu-miR-152; mmu-miR-29c; mmu-miR-29b; mmu-miR-29a; mmu-miR-1960; mmu-miR-148b; mmu-miR-291b-5p; mmu-miR-34a; mmu-miR-96; mmu-miR-148a; mmu-miR-182; mmu-miR-291a-5p
Stat1	2.568	66	25.7009	mmu-miR-200a; mmu-miR-495; mmu-miR-467e; mmu-miR-145; mmu-miR-93; mmu-miR-713; mmu-miR-96; mmu-miR-200b; mmu-miR-466g; mmu-miR-431; mmu-miR-19a; mmu-miR-20a; mmu-miR-466b-3p; mmu-miR-434-3p; mmu-miR-669o-5p; mmu-miR-21; mmu-miR-181a; mmu-miR-290-3p; mmu-miR-205; mmu-miR-543; mmu-miR-132; mmu-miR-669o-3p; mmu-miR-467a; mmu-miR-467h; mmu-miR-106a; mmu-miR-103; mmu-miR-182; mmu-miR-1983; mmu-miR-17;…
Stat3	3.701	87	23.5072	mmu-miR-200a; mmu-miR-495; mmu-miR-145; mmu-miR-713; mmu-miR-150; mmu-miR-674; mmu-miR-467f; mmu-miR-340-5p; mmu-miR-466b-3p; mmu-miR-30d; mmu-miR-296-5p; mmu-miR-30a; mmu-miR-28; mmu-miR-434-3p; mmu-miR-290-3p; mmu-let-7a; mmu-miR-34a; mmu-miR-467a; mmu-miR-30b; mmu-miR-541; mmu-miR-1983; mmu-miR-129-2-3p; mmu-miR-202-3p; mmu-miR-381; mmu-miR-292-3p; mmu-miR-1952; mmu-miR-129-1-3p; mmu-let-7g; m…
Stbd1	0.91	12	13.1868	mmu-miR-330; mmu-miR-290-3p; mmu-miR-99b; mmu-miR-467a; mmu-miR-27a; mmu-miR-30b; mmu-miR-760-5p; mmu-miR-129-2-3p; mmu-miR-292-3p; mmu-miR-129-1-3p; mmu-miR-30d; mmu-miR-30a
Stc2	2.837	53	18.6817	mmu-miR-195; mmu-miR-350; mmu-miR-96; mmu-miR-136; mmu-miR-16; mmu-miR-125a-5p; mmu-miR-431; mmu-miR-669d; mmu-miR-19a; mmu-miR-340-5p; mmu-miR-125b-5p; mmu-miR-762; mmu-miR-296-5p; mmu-miR-377; mmu-miR-323-3p; mmu-miR-434-3p; mmu-miR-21; mmu-miR-335-3p; mmu-miR-543; mmu-miR-15a; mmu-miR-27a; mmu-miR-1198-5p; mmu-miR-182; mmu-miR-329; mmu-miR-26b; mmu-miR-142-5p; mmu-miR-1935; mmu-miR-26a; mmu-mi…
Stk38	1.661	43	25.888	mmu-miR-200a; mmu-miR-467e; mmu-miR-93; mmu-miR-431; mmu-miR-150; mmu-miR-674; mmu-miR-20a; mmu-miR-290-3p; mmu-miR-34a; mmu-miR-467a; mmu-miR-467h; mmu-miR-106a; mmu-miR-17; mmu-miR-381; mmu-miR-292-3p; mmu-miR-1952; mmu-miR-302a; mmu-miR-302d; mmu-miR-433; mmu-miR-124; mmu-miR-20b; mmu-miR-295; mmu-miR-23b; mmu-miR-762; mmu-miR-141; mmu-miR-330; mmu-miR-34c; mmu-miR-335-3p; mmu-miR-22; mmu-miR-…
Stmn2	1.281	36	28.103	mmu-miR-495; mmu-miR-29b; mmu-miR-713; mmu-miR-96; mmu-miR-467c; mmu-miR-369-3p; mmu-miR-434-3p; mmu-miR-29c; mmu-miR-155; mmu-miR-290-3p; mmu-miR-543; mmu-miR-467a; mmu-miR-27a; mmu-miR-468; mmu-miR-103; mmu-miR-381; mmu-miR-292-3p; mmu-miR-302a; mmu-miR-423-5p; mmu-miR-302d; mmu-miR-433; mmu-miR-1960; mmu-miR-374; mmu-miR-295; mmu-miR-23b; mmu-miR-101b; mmu-miR-741; mmu-miR-291b-3p; mmu-miR-29a…
Stra8	0.174	1	5.74713	mmu-miR-434-3p
Stx3	1.717	40	23.2964	mmu-miR-495; mmu-miR-713; mmu-miR-130a; mmu-miR-130b; mmu-miR-30d; mmu-miR-323-3p; mmu-miR-30a; mmu-miR-205; mmu-miR-30b; mmu-miR-541; mmu-miR-182; mmu-miR-154; mmu-miR-423-5p; mmu-miR-195; mmu-miR-124; mmu-miR-297c; mmu-miR-872; mmu-miR-125a-5p; mmu-miR-16; mmu-miR-484; mmu-miR-125b-5p; mmu-miR-18b; mmu-miR-23b; mmu-miR-741; mmu-miR-1196; mmu-miR-760-3p; mmu-miR-15a; mmu-miR-378; mmu-miR-301a; m…
Susd4	1.364	17	12.4633	mmu-miR-195; mmu-miR-433; mmu-miR-378; mmu-miR-15a; mmu-miR-872; mmu-miR-16; mmu-miR-466g; mmu-miR-467f; mmu-miR-381; mmu-miR-762; mmu-miR-1935; mmu-miR-15b; mmu-miR-292-5p; mmu-miR-741; mmu-miR-423-5p
Svep1	0.705	12	17.0213	mmu-miR-466c-3p; mmu-miR-195; mmu-miR-15a; mmu-miR-16; mmu-miR-431; mmu-miR-468; mmu-miR-103; mmu-miR-672; mmu-miR-33; mmu-miR-466b-3p; mmu-miR-15b; mmu-miR-410
Svop	1.348	37	27.4481	mmu-miR-145; mmu-miR-93; mmu-miR-431; mmu-miR-20a; mmu-miR-466b-3p; mmu-miR-296-5p; mmu-miR-323-3p; mmu-miR-106a; mmu-miR-103; mmu-miR-17; mmu-miR-1952; mmu-miR-302a; mmu-miR-302d; mmu-miR-124; mmu-miR-136; mmu-miR-125a-5p; mmu-miR-1198-3p; mmu-miR-760-5p; mmu-miR-20b; mmu-miR-484; mmu-miR-295; mmu-miR-125b-5p; mmu-miR-23b; mmu-miR-762; mmu-miR-466c-3p; mmu-miR-330; mmu-miR-382; mmu-miR-106b; mmu…
Syap1	0.827	28	33.8573	mmu-miR-466a-3p; mmu-miR-195; mmu-miR-433; mmu-miR-297c; mmu-miR-1960; mmu-miR-124; mmu-miR-93; mmu-miR-130a; mmu-miR-16; mmu-miR-20b; mmu-miR-130b; mmu-miR-20a; mmu-miR-291a-5p; mmu-miR-291b-3p; mmu-miR-543; mmu-miR-291b-5p; mmu-miR-15a; mmu-miR-27a; mmu-miR-301a; mmu-miR-106b; mmu-miR-532-5p; mmu-miR-106a; mmu-miR-182; mmu-miR-17; mmu-miR-142-5p; mmu-miR-297a; mmu-miR-15b
Syce2	1.042	21	20.1536	mmu-miR-29b; mmu-miR-124; mmu-miR-125a-5p; mmu-miR-466g; mmu-miR-340-5p; mmu-miR-125b-5p; mmu-miR-23b; mmu-miR-30d; mmu-miR-30a; mmu-miR-434-3p; mmu-miR-29a; mmu-miR-29c; mmu-miR-30b; mmu-miR-183; mmu-miR-1224; mmu-miR-329; mmu-miR-142-5p; mmu-miR-23a; mmu-miR-292-5p; mmu-miR-423-5p
Syn1	1.033	19	18.393	mmu-miR-145; mmu-miR-136; mmu-miR-125a-5p; mmu-miR-760-5p; mmu-miR-150; mmu-miR-23b; mmu-miR-125b-5p; mmu-miR-330; mmu-miR-134; mmu-miR-760-3p; mmu-miR-378; mmu-miR-1198-5p; mmu-miR-1983; mmu-miR-329; mmu-miR-1952; mmu-miR-1935; mmu-miR-23a
Syt13	2.391	44	18.4023	mmu-miR-200a; mmu-miR-495; mmu-miR-335-5p; mmu-miR-466g; mmu-miR-674; mmu-miR-467f; mmu-miR-340-5p; mmu-miR-466b-3p; mmu-miR-296-5p; mmu-miR-669o-5p; mmu-miR-290-3p; mmu-miR-132; mmu-miR-669o-3p; mmu-miR-467a; mmu-miR-27a; mmu-miR-468; mmu-miR-103; mmu-miR-421; mmu-miR-292-3p; mmu-miR-466a-3p; mmu-miR-669a-3p; mmu-miR-350; mmu-miR-1198-3p; mmu-miR-669d; mmu-miR-18b; mmu-miR-762; mmu-miR-376c; mmu…
Syt7	4.737	60	12.6662	mmu-miR-29b; mmu-miR-93; mmu-miR-130a; mmu-miR-19a; mmu-miR-130b; mmu-miR-150; mmu-miR-674; mmu-miR-20a; mmu-miR-340-5p; mmu-miR-296-5p; mmu-miR-323-3p; mmu-miR-29c; mmu-miR-205; mmu-miR-669f-3p; mmu-miR-1198-5p; mmu-miR-541; mmu-miR-106a; mmu-miR-1983; mmu-miR-17; mmu-miR-381; mmu-miR-1952; mmu-miR-423-5p; mmu-miR-19b; mmu-miR-297c; mmu-miR-125a-5p; mmu-miR-20b; mmu-miR-125b-5p; mmu-miR-18b; mmu…
T	0.627	8	12.7592	mmu-miR-669d; mmu-miR-350; mmu-miR-145; mmu-miR-124; mmu-miR-291b-5p; mmu-miR-421; mmu-miR-335-5p; mmu-miR-291a-5p
Tacc3	0.27	2	7.40741	mmu-miR-142-5p; mmu-miR-136
Taf9	0.215	1	4.65116	mmu-miR-872
Tagln	0.743	20	26.9179	mmu-miR-350; mmu-miR-429; mmu-miR-96; mmu-miR-200b; mmu-miR-125a-5p; mmu-miR-484; mmu-miR-125b-5p; mmu-miR-762; mmu-miR-34c; mmu-miR-34a; mmu-miR-182; mmu-miR-103; mmu-miR-468; mmu-miR-129-2-3p; mmu-miR-200c; mmu-miR-421; mmu-miR-1935; mmu-miR-129-1-3p
Tap2	0.228	1	4.38596	mmu-miR-423-5p
Tapbpl	0.733	17	23.1924	mmu-miR-141; mmu-let-7g; mmu-miR-200a; mmu-miR-291b-5p; mmu-miR-134; mmu-let-7a; mmu-miR-378; mmu-miR-193b; mmu-let-7e; mmu-miR-202-3p; mmu-miR-18b; mmu-miR-762; mmu-miR-1935; mmu-miR-291a-5p; mmu-let-7c
Tars	0.348	2	5.74713	mmu-miR-297c; mmu-miR-297a
Tasp1	0.875	38	43.4286	mmu-miR-32; mmu-miR-302d; mmu-miR-200a; mmu-miR-467e; mmu-miR-335-5p; mmu-miR-130a; mmu-miR-760-5p; mmu-miR-467c; mmu-miR-363-3p; mmu-miR-130b; mmu-miR-295; mmu-miR-762; mmu-miR-141; mmu-miR-291b-3p; mmu-miR-290-3p; mmu-miR-367; mmu-miR-132; mmu-miR-467a; mmu-miR-382; mmu-miR-301a; mmu-miR-467h; mmu-miR-25; mmu-miR-291a-3p; mmu-miR-292-3p; mmu-miR-302a; mmu-miR-466f; mmu-miR-294
Tatdn2	0.369	6	16.2602	mmu-miR-468; mmu-miR-1983; mmu-miR-205; mmu-miR-674; mmu-miR-193b; mmu-miR-101b
Tax1bp3	0.927	25	26.9687	mmu-miR-195; mmu-miR-713; mmu-miR-96; mmu-miR-16; mmu-miR-466g; mmu-miR-674; mmu-miR-762; mmu-miR-296-5p; mmu-miR-330; mmu-miR-669o-5p; mmu-miR-134; mmu-miR-22; mmu-miR-15a; mmu-miR-382; mmu-miR-1198-5p; mmu-miR-182; mmu-miR-129-2-3p; mmu-miR-672; mmu-miR-1935; mmu-miR-129-1-3p; mmu-miR-15b
Tbc1d20	2.031	40	19.6947	mmu-miR-302d; mmu-miR-495; mmu-miR-350; mmu-miR-124; mmu-miR-93; mmu-miR-125a-5p; mmu-miR-760-5p; mmu-miR-466g; mmu-miR-20b; mmu-miR-295; mmu-miR-20a; mmu-miR-125b-5p; mmu-miR-296-5p; mmu-miR-291a-5p; mmu-miR-34c; mmu-miR-330; mmu-miR-335-3p; mmu-miR-760-3p; mmu-miR-543; mmu-miR-291b-5p; mmu-miR-34a; mmu-miR-22; mmu-miR-106b; mmu-miR-106a; mmu-miR-17; mmu-miR-291a-3p; mmu-miR-329; mmu-miR-421; mm…
Tbc1d8b	1.564	53	33.8875	mmu-miR-93; mmu-miR-130a; mmu-miR-130b; mmu-miR-674; mmu-miR-369-3p; mmu-miR-20a; mmu-miR-367; mmu-miR-669o-3p; mmu-miR-27a; mmu-miR-106a; mmu-miR-182; mmu-miR-17; mmu-miR-302a; mmu-miR-302d; mmu-miR-32; mmu-miR-669a-3p; mmu-miR-125a-5p; mmu-miR-374; mmu-miR-669d; mmu-miR-20b; mmu-miR-363-3p; mmu-miR-484; mmu-miR-295; mmu-miR-125b-5p; mmu-miR-101b; mmu-miR-291b-3p; mmu-miR-134; mmu-miR-106b; mmu-…
Tceb1	1.563	52	33.2694	mmu-miR-467e; mmu-miR-29b; mmu-miR-93; mmu-miR-713; mmu-miR-130a; mmu-miR-467c; mmu-miR-130b; mmu-miR-674; mmu-miR-20a; mmu-miR-340-5p; mmu-miR-21; mmu-miR-29c; mmu-miR-290-3p; mmu-let-7a; mmu-miR-669o-3p; mmu-miR-467a; mmu-miR-1198-5p; mmu-miR-467h; mmu-miR-106a; mmu-miR-103; mmu-miR-17; mmu-miR-202-3p; mmu-miR-292-3p; mmu-miR-154; mmu-miR-302a; mmu-miR-669a-3p; mmu-let-7g; mmu-miR-302d; mmu-miR…
Tcerg1	0.832	21	25.2404	mmu-miR-466a-3p; mmu-miR-200a; mmu-miR-495; mmu-miR-297c; mmu-miR-374; mmu-miR-431; mmu-miR-369-3p; mmu-miR-340-5p; mmu-miR-30d; mmu-miR-291a-5p; mmu-miR-30a; mmu-miR-141; mmu-miR-181a; mmu-miR-330; mmu-miR-543; mmu-miR-291b-5p; mmu-miR-30b; mmu-miR-421; mmu-miR-297a
Tcf12	3.884	63	16.2204	mmu-miR-29b; mmu-miR-145; mmu-miR-93; mmu-miR-804; mmu-miR-335-5p; mmu-miR-96; mmu-miR-674; mmu-miR-369-3p; mmu-miR-20a; mmu-miR-467f; mmu-miR-340-5p; mmu-miR-291a-5p; mmu-miR-29c; mmu-miR-205; mmu-miR-543; mmu-miR-367; mmu-miR-291b-5p; mmu-miR-34a; mmu-miR-27a; mmu-miR-1983; mmu-miR-106a; mmu-miR-103; mmu-miR-182; mmu-miR-17; mmu-miR-381; mmu-miR-1952; mmu-miR-195; mmu-miR-32; mmu-miR-124; mmu-m…
Tcf15	0.327	3	9.17431	mmu-miR-330; mmu-miR-760-3p; mmu-miR-762
Tcf4	4.895	128	26.1491	mmu-miR-495; mmu-miR-145; mmu-miR-93; mmu-miR-713; mmu-miR-335-5p; mmu-miR-96; mmu-miR-466g; mmu-miR-431; mmu-miR-20a; mmu-miR-340-5p; mmu-miR-466b-3p; mmu-miR-30d; mmu-miR-323-3p; mmu-miR-30a; mmu-miR-434-3p; mmu-miR-29c; mmu-miR-290-3p; mmu-miR-155; mmu-miR-367; mmu-miR-541; mmu-miR-106a; mmu-miR-17; mmu-miR-381; mmu-miR-292-3p; mmu-miR-669a-3p; mmu-miR-124; mmu-miR-148b; mmu-miR-669l; mmu-miR-…
Tcf7	1.512	18	11.9048	mmu-miR-142-3p; mmu-miR-335-3p; mmu-miR-29c; mmu-miR-29b; mmu-miR-29a; mmu-miR-155; mmu-miR-543; mmu-miR-335-5p; mmu-miR-22; mmu-miR-96; mmu-miR-125a-5p; mmu-miR-484; mmu-miR-720; mmu-miR-125b-5p; mmu-miR-18b; mmu-miR-377
Tcl1	0.962	17	17.6715	mmu-miR-669l; mmu-miR-760-5p; mmu-miR-669f-5p; mmu-miR-150; mmu-miR-466b-3p; mmu-miR-296-5p; mmu-miR-30d; mmu-miR-30a; mmu-miR-466c-3p; mmu-miR-330; mmu-miR-34c; mmu-miR-34a; mmu-miR-669a-5p; mmu-miR-382; mmu-miR-30b; mmu-miR-423-3p
Tdg	2.079	52	25.012	mmu-miR-200a; mmu-miR-29b; mmu-miR-145; mmu-miR-466g; mmu-miR-674; mmu-miR-466b-3p; mmu-miR-30d; mmu-miR-291a-5p; mmu-miR-30a; mmu-miR-29c; mmu-miR-291b-5p; mmu-miR-27a; mmu-miR-30b; mmu-miR-103; mmu-miR-26b; mmu-miR-421; mmu-miR-124; mmu-miR-148b; mmu-miR-136; mmu-miR-125a-5p; mmu-miR-374; mmu-miR-148a; mmu-miR-760-5p; mmu-miR-125b-5p; mmu-miR-376c; mmu-miR-141; mmu-miR-466c-3p; mmu-miR-152; mmu…
Tdgf1	1.101	20	18.1653	mmu-miR-195; mmu-miR-433; mmu-miR-669l; mmu-miR-374; mmu-miR-16; mmu-miR-19a; mmu-miR-669f-5p; mmu-miR-369-3p; mmu-miR-340-5p; mmu-miR-181a; mmu-miR-669f-3p; mmu-miR-669a-5p; mmu-miR-15a; mmu-miR-27a; mmu-miR-1224; mmu-miR-154; mmu-miR-381; mmu-miR-15b; mmu-miR-19b; mmu-miR-466f
Tdh	0.381	15	39.3701	mmu-miR-291b-3p; mmu-miR-467e; mmu-miR-29c; mmu-miR-29b; mmu-miR-29a; mmu-miR-134; mmu-miR-93; mmu-miR-106b; mmu-miR-467h; mmu-miR-423-3p; mmu-miR-106a; mmu-miR-20b; mmu-miR-17; mmu-miR-20a; mmu-miR-762
Tdrd12	0.188	2	10.6383	mmu-miR-129-2-3p; mmu-miR-129-1-3p
Tdrd5	0.278	3	10.7914	mmu-miR-468; mmu-miR-433; mmu-miR-1983
Tekt1	0.042	1	23.8095	mmu-miR-28
Terf1	0.97	20	20.6186	mmu-miR-32; mmu-miR-142-3p; mmu-miR-495; mmu-miR-124; mmu-miR-335-5p; mmu-miR-363-3p; mmu-miR-376c; mmu-miR-30d; mmu-miR-741; mmu-miR-323-3p; mmu-miR-30a; mmu-miR-155; mmu-miR-367; mmu-miR-30b; mmu-miR-183; mmu-miR-25; mmu-miR-672; mmu-miR-421; mmu-miR-410
Tes	1.047	40	38.2044	mmu-miR-466a-3p; mmu-let-7g; mmu-miR-467e; mmu-miR-93; mmu-miR-96; mmu-miR-130a; mmu-miR-20b; mmu-miR-130b; mmu-miR-150; mmu-miR-20a; mmu-miR-376c; mmu-miR-30d; mmu-let-7c; mmu-miR-741; mmu-miR-30a; mmu-miR-291b-3p; mmu-miR-335-3p; mmu-let-7a; mmu-miR-30b; mmu-miR-301a; mmu-miR-106b; mmu-miR-467h; mmu-miR-106a; mmu-let-7e; mmu-miR-182; mmu-miR-17; mmu-miR-202-3p; mmu-miR-381; mmu-miR-1935
Tet1	7.962	145	18.2115	mmu-miR-495; mmu-miR-145; mmu-miR-804; mmu-miR-96; mmu-miR-431; mmu-miR-19a; mmu-miR-340-5p; mmu-miR-30d; mmu-miR-30a; mmu-miR-28; mmu-miR-434-3p; mmu-miR-669f-3p; mmu-miR-367; mmu-let-7a; mmu-miR-468; mmu-miR-129-2-3p; mmu-miR-202-3p; mmu-miR-672; mmu-miR-381; mmu-miR-154; mmu-miR-129-1-3p; mmu-miR-669a-3p; mmu-miR-466a-3p; mmu-let-7g; mmu-miR-433; mmu-miR-124; mmu-miR-148b; mmu-miR-136; mmu-miR…
Tex19.1	0.446	14	31.3901	mmu-miR-669a-3p; mmu-miR-466c-3p; mmu-miR-466a-3p; mmu-miR-141; mmu-miR-200a; mmu-miR-669o-3p; mmu-miR-27a; mmu-miR-125a-5p; mmu-miR-672; mmu-miR-125b-5p; mmu-miR-421; mmu-miR-466b-3p
Tfam	3.095	81	26.1712	mmu-miR-495; mmu-miR-467e; mmu-miR-145; mmu-miR-93; mmu-miR-130a; mmu-miR-200b; mmu-miR-19a; mmu-miR-130b; mmu-miR-150; mmu-miR-674; mmu-miR-369-3p; mmu-miR-20a; mmu-miR-340-5p; mmu-miR-466b-3p; mmu-miR-28; mmu-miR-669o-5p; mmu-miR-21; mmu-miR-181a; mmu-miR-155; mmu-miR-543; mmu-miR-467h; mmu-miR-106a; mmu-miR-17; mmu-miR-129-2-3p; mmu-miR-129-1-3p; mmu-miR-19b; mmu-miR-195; mmu-miR-350; mmu-miR-…
Tfb2m	1.122	7	6.23886	mmu-miR-141; mmu-miR-1196; mmu-miR-200a; mmu-miR-182; mmu-miR-145; mmu-miR-96; mmu-miR-760-5p
Tfrc	2.458	67	27.2579	mmu-miR-200a; mmu-miR-495; mmu-miR-145; mmu-miR-804; mmu-miR-130a; mmu-miR-467c; mmu-miR-19a; mmu-miR-130b; mmu-miR-150; mmu-miR-674; mmu-miR-340-5p; mmu-miR-466b-3p; mmu-miR-30d; mmu-miR-30a; mmu-miR-28; mmu-miR-434-3p; mmu-miR-290-3p; mmu-miR-205; mmu-miR-155; mmu-miR-543; mmu-miR-34a; mmu-miR-467a; mmu-miR-27a; mmu-miR-30b; mmu-miR-182; mmu-miR-26b; mmu-miR-292-3p; mmu-miR-154; mmu-miR-302a; m…
Tgfb1i1	1.096	23	20.9854	mmu-miR-32; mmu-miR-302d; mmu-miR-145; mmu-miR-125a-5p; mmu-miR-466g; mmu-miR-484; mmu-miR-363-3p; mmu-miR-295; mmu-miR-125b-5p; mmu-miR-762; mmu-miR-377; mmu-miR-34c; mmu-miR-205; mmu-miR-760-3p; mmu-miR-367; mmu-miR-22; mmu-miR-34a; mmu-miR-25; mmu-miR-103; mmu-miR-291a-3p; mmu-miR-302a; mmu-miR-423-5p; mmu-miR-294
Tgfb2	2.656	26	9.78916	mmu-miR-200a; mmu-miR-495; mmu-miR-297c; mmu-miR-804; mmu-miR-713; mmu-miR-125a-5p; mmu-miR-431; mmu-miR-1198-3p; mmu-miR-669d; mmu-miR-674; mmu-miR-125b-5p; mmu-miR-291a-5p; mmu-miR-101b; mmu-miR-28; mmu-miR-434-3p; mmu-miR-141; mmu-miR-335-3p; mmu-miR-760-3p; mmu-miR-669f-3p; mmu-miR-543; mmu-miR-132; mmu-miR-134; mmu-miR-291b-5p; mmu-miR-297a; mmu-miR-410
Tgfb3	1.036	10	9.65251	mmu-miR-124; mmu-miR-804; mmu-miR-713; mmu-miR-378; mmu-miR-1983; mmu-miR-142-5p; mmu-miR-18b; mmu-miR-340-5p; mmu-miR-1935; mmu-miR-296-5p
Tgfbi	0.582	16	27.4914	mmu-miR-21; mmu-miR-181a; mmu-miR-297c; mmu-miR-543; mmu-miR-335-5p; mmu-miR-99b; mmu-miR-96; mmu-miR-760-5p; mmu-miR-466g; mmu-miR-468; mmu-miR-182; mmu-miR-23b; mmu-miR-297a; mmu-miR-23a; mmu-miR-741
Tgfbr2	2.68	51	19.0299	mmu-miR-29b; mmu-miR-145; mmu-miR-93; mmu-miR-713; mmu-miR-466g; mmu-miR-431; mmu-miR-467c; mmu-miR-150; mmu-miR-674; mmu-miR-20a; mmu-miR-291a-5p; mmu-miR-28; mmu-miR-434-3p; mmu-miR-181a; mmu-miR-29c; mmu-miR-155; mmu-miR-367; mmu-miR-291b-5p; mmu-miR-1198-5p; mmu-miR-106a; mmu-miR-17; mmu-miR-672; mmu-miR-32; mmu-miR-124; mmu-miR-1960; mmu-miR-297c; mmu-miR-760-5p; mmu-miR-20b; mmu-miR-363-3p;…
Tgm1	0.194	2	10.3093	mmu-miR-484; mmu-miR-296-5p
Tgoln1	3.673	58	15.7909	mmu-miR-495; mmu-miR-467e; mmu-miR-145; mmu-miR-804; mmu-miR-713; mmu-miR-96; mmu-miR-130a; mmu-miR-431; mmu-miR-19a; mmu-miR-130b; mmu-miR-669o-5p; mmu-miR-21; mmu-miR-181a; mmu-miR-205; mmu-let-7a; mmu-miR-27a; mmu-miR-191; mmu-miR-467h; mmu-miR-541; mmu-miR-103; mmu-miR-182; mmu-miR-26b; mmu-miR-202-3p; mmu-miR-672; mmu-miR-154; mmu-miR-19b; mmu-let-7g; mmu-miR-1960; mmu-miR-297c; mmu-miR-374;…
Thbd	1.747	24	13.7378	mmu-miR-669a-3p; mmu-miR-495; mmu-miR-145; mmu-miR-669l; mmu-miR-136; mmu-miR-374; mmu-miR-760-5p; mmu-miR-669f-5p; mmu-miR-484; mmu-miR-369-3p; mmu-miR-762; mmu-miR-669o-5p; mmu-miR-330; mmu-miR-335-3p; mmu-miR-760-3p; mmu-miR-669o-3p; mmu-miR-669a-5p; mmu-miR-1198-5p; mmu-miR-193b; mmu-miR-129-2-3p; mmu-miR-329; mmu-miR-381; mmu-miR-129-1-3p
Thbs1	2.104	47	22.3384	mmu-miR-804; mmu-miR-19a; mmu-miR-674; mmu-miR-467f; mmu-miR-323-3p; mmu-miR-290-3p; mmu-miR-669f-3p; mmu-miR-543; mmu-let-7a; mmu-miR-132; mmu-miR-467a; mmu-miR-103; mmu-miR-182; mmu-miR-129-2-3p; mmu-miR-202-3p; mmu-miR-672; mmu-miR-381; mmu-miR-292-3p; mmu-miR-129-1-3p; mmu-miR-19b; mmu-let-7g; mmu-miR-195; mmu-miR-466a-3p; mmu-miR-124; mmu-miR-16; mmu-miR-484; mmu-miR-18b; mmu-miR-376c; mmu-l…
Thbs2	2.013	41	20.3676	mmu-miR-29b; mmu-miR-804; mmu-miR-335-5p; mmu-miR-96; mmu-miR-466g; mmu-miR-150; mmu-miR-340-5p; mmu-miR-181a; mmu-miR-29c; mmu-miR-155; mmu-miR-205; mmu-miR-367; mmu-miR-34a; mmu-miR-27a; mmu-miR-1198-5p; mmu-miR-182; mmu-miR-421; mmu-miR-381; mmu-miR-32; mmu-miR-433; mmu-miR-148b; mmu-miR-1960; mmu-miR-760-5p; mmu-miR-1198-3p; mmu-miR-148a; mmu-miR-484; mmu-miR-363-3p; mmu-miR-377; mmu-miR-152;…
Thy1	1.128	25	22.1631	mmu-miR-466a-3p; mmu-miR-495; mmu-miR-335-5p; mmu-miR-125a-5p; mmu-miR-760-5p; mmu-miR-669d; mmu-miR-484; mmu-miR-150; mmu-miR-720; mmu-miR-467f; mmu-miR-125b-5p; mmu-miR-762; mmu-miR-296-5p; mmu-miR-22; mmu-miR-103; mmu-miR-468; mmu-miR-1952; mmu-miR-421; mmu-miR-1935; mmu-miR-423-5p
Tia1	3.515	96	27.3115	mmu-miR-93; mmu-miR-335-5p; mmu-miR-466g; mmu-miR-19a; mmu-miR-20a; mmu-miR-340-5p; mmu-miR-466b-3p; mmu-miR-30d; mmu-miR-30a; mmu-miR-434-3p; mmu-miR-29c; mmu-miR-367; mmu-let-7a; mmu-miR-106a; mmu-miR-129-2-3p; mmu-miR-17; mmu-miR-154; mmu-miR-129-1-3p; mmu-let-7g; mmu-miR-433; mmu-miR-124; mmu-miR-148b; mmu-miR-669l; mmu-miR-148a; mmu-miR-669f-5p; mmu-miR-20b; mmu-miR-23b; mmu-miR-377; mmu-miR…
[truncated: 147 more rows]
